# Supplementary material for: Global and context-specific transcriptional consequences of oncogenic Fbw7 mutations
Source: eLife. 2022 Feb 28;11:e74338. doi: 10.7554/eLife.74338 (PMC8926403; doi:10.7554/eLife.74338)
Supplement: Figure 1—source data 1. — This Excel file contains the differential analysis output of Hct116 RNA-Seq data from WT, Fbw7−/− (Del), and Fbw7R/+ (R). DE=0, not differentially expressed (DE) in the mutant compared to WT; DE=1, DE in the mutant compared to WT. WT, wild-type. [file elife-74338-fig1-data1.xlsx]

## Sheet: Hct116 RNA-Seq DGE output
gene_id	gene_type	gene_name	Del_vs_WT.log2FC	Del_vs_WT.PValue	Del_vs_WT.FDR	Del_vs_WT.is.DE	R_vs_WT.log2FC	R_vs_WT.PValue	R_vs_WT.FDR	R_vs_WT.is.DE	CPM.TMMnormalized.1_mut_del_051018	CPM.TMMnormalized.1_mut_r_051018	CPM.TMMnormalized.1_WT_051018	CPM.TMMnormalized.2_mut_del_051018	CPM.TMMnormalized.2_mut_r_051018	CPM.TMMnormalized.2_WT_051018	CPM.TMMnormalized.3_mut_del_051018	CPM.TMMnormalized.3_mut_r_051018	CPM.TMMnormalized.3_WT_051018	FPKM.TMMnormalized.1_mut_del_051018	FPKM.TMMnormalized.1_mut_r_051018	FPKM.TMMnormalized.1_WT_051018	FPKM.TMMnormalized.2_mut_del_051018	FPKM.TMMnormalized.2_mut_r_051018	FPKM.TMMnormalized.2_WT_051018	FPKM.TMMnormalized.3_mut_del_051018	FPKM.TMMnormalized.3_mut_r_051018	FPKM.TMMnormalized.3_WT_051018
ENSG00000227232.5_2	unprocessed_pseudogene	WASH7P	-0.029681	0.888542	0.924834	0	-0.176681	0.413791	0.632651	0	3.23284	2.69881	4.17335	3.23159	3.46683	3.10122	4.50483	3.66729	3.87556	2.39292	1.99764	3.08908	2.392	2.56612	2.2955	3.33444	2.7145	2.86866
ENSG00000237683.5	protein_coding	AL627309.1	0.223519	0.191189	0.308929	0	0.292162	0.0904895	0.246388	0	6.78366	5.74747	5.80197	7.54037	6.98782	4.42379	5.48666	8.1549	6.90645	2.54929	2.15989	2.18037	2.83366	2.62601	1.66245	2.06188	3.0646	2.59543
ENSG00000237973.1_4	unprocessed_pseudogene	MTCO1P12	0.224184	0.527243	0.647984	0	0.00771224	0.982579	0.992748	0	272.406	82.9135	225.768	357.988	343.703	184.157	226.224	311.671	324.355	176.543	53.7353	146.317	232.008	222.75	119.35	146.613	201.991	210.21
ENSG00000198744.5_4	unprocessed_pseudogene	MTCO3P12	0.285107	0.426269	0.555439	0	-0.201188	0.575975	0.75984	0	160.423	37.9333	129.272	216.92	167.708	103.389	124.287	153.495	180.114	293.278	69.3479	236.329	396.564	306.595	189.011	227.216	280.613	329.276
ENSG00000228327.3_6	transcribed_unprocessed_pseudogene	AL669831.1	0.330181	0.0778618	0.154386	0	0.0702529	0.701913	0.845307	0	6.20069	3.89829	4.78408	6.01435	5.25441	3.23803	4.85136	5.16316	5.66428	0.964037	0.606077	0.743794	0.935066	0.816917	0.503426	0.754254	0.80273	0.880641
ENSG00000106609.16_4	protein_coding	TMEM248	0.209705	0.000406096	0.00220066	0	0.141928	0.00912027	0.0499865	0	113.414	111.351	99.855	117.459	110.343	103.845	117.703	110.887	97.684	22.2993	21.8936	19.6333	23.0946	21.6954	20.4178	23.1426	21.8025	19.2065
ENSG00000230937.12_4	lncRNA	MIR205HG	8.66352	1.31895e-08	3.50529e-07	1	0	1	1	0	2.33188	0	0	2.51346	0	0	2.88771	0	0	0.661903	0	0	0.713443	0	0	0.819675	0	0
ENSG00000223764.2_6	lncRNA	LINC02593	-0.517783	0.085409	0.165887	0	-0.395244	0.175684	0.375933	0	1.9079	1.49934	1.78131	1.79533	2.54595	2.05227	1.21284	1.39936	3.27932	0.459514	0.361113	0.429024	0.432401	0.613187	0.494286	0.29211	0.337033	0.789817
ENSG00000185760.15_5	protein_coding	KCNQ5	8.76379	1.03931e-08	2.87876e-07	1	0	1	1	0	2.49087	0	0	3.14182	0	0	2.59894	0	0	0.329046	0	0	0.415036	0	0	0.343321	0	0
ENSG00000129682.16_5	protein_coding	FGF13	9.13301	6.88905e-10	2.67247e-08	1	0	1	1	0	3.44483	0	0	4.17414	0	0	3.00322	0	0	0.16612	0	0	0.201289	0	0	0.144824	0	0
ENSG00000187961.14_5	protein_coding	KLHL17	0.19145	0.103683	0.193165	0	-0.0736513	0.521957	0.721421	0	66.5117	41.5317	51.9124	59.2907	50.7565	47.4303	52.0366	55.7814	56.5931	19.5508	12.208	15.2594	17.4282	14.9196	13.9419	15.2959	16.3967	16.6353
ENSG00000187583.10_3	protein_coding	PLEKHN1	0.144745	0.249698	0.377358	0	-0.0458132	0.714986	0.852725	0	9.64551	7.79657	8.2958	11.6696	9.37126	8.84758	8.89416	9.45775	10.3348	3.4047	2.75205	2.92827	4.11918	3.30789	3.12304	3.13948	3.33842	3.64802
ENSG00000187642.9_2	protein_coding	PERM1	0.19972	0.318593	0.451322	0	-0.000606975	0.997617	0.99907	0	2.91485	2.29899	2.39204	3.36624	2.2751	2.32591	2.36793	2.99174	2.88183	0.851301	0.671434	0.69861	0.98313	0.664458	0.679297	0.691567	0.873755	0.841655
ENSG00000272512.1_6	lncRNA	AL645608.7	0.324744	0.181407	0.297183	0	0.0435463	0.857745	0.93177	0	4.50477	2.44892	2.69741	5.25133	4.76689	3.55728	4.50483	4.58411	5.16742	2.15953	1.17398	1.2931	2.51742	2.28518	1.70531	2.15956	2.19756	2.47719
ENSG00000188290.10_3	protein_coding	HES4	0.091038	0.432779	0.561842	0	-0.0567705	0.625928	0.79374	0	20.139	14.9434	16.897	18.5368	15.5465	17.5584	14.7851	17.8539	15.8501	18.0134	13.3662	15.1136	16.5803	13.9057	15.7051	13.2246	15.9695	14.1771
ENSG00000134330.18_4	protein_coding	IAH1	0.349199	0.00105567	0.00484247	0	0.000143002	0.998773	0.999644	0	17.0651	13.544	13.7415	17.1005	12.3506	14.0923	18.1348	15.0552	13.167	2.88848	2.29249	2.32592	2.89446	2.09048	2.38529	3.06954	2.54827	2.22867
ENSG00000188157.15_5	protein_coding	AGRN	0.162362	0.129512	0.229832	0	-0.0069797	0.946469	0.97498	0	155.653	117.748	132.885	154.937	122.043	110.732	121.226	144.424	142.75	14.4646	10.9421	12.3488	14.398	11.3412	10.2901	11.2653	13.421	13.2655
ENSG00000156650.14_5	protein_coding	KAT6B	0.385049	0.000297927	0.0017034	0	-0.000124726	0.998882	0.999644	0	57.6081	44.4305	45.4997	60.5025	45.4479	42.4137	56.9457	44.2488	46.2583	1.77283	1.3673	1.4002	1.8619	1.39861	1.30524	1.75245	1.36171	1.42355
ENSG00000273443.1_6	lncRNA	AL645608.8	0.594593	0.0291096	0.0708996	0	0.0143326	0.95794	0.981263	0	2.0669	1.09952	1.17057	1.75044	1.08338	0.957728	1.15509	1.15809	1.19248	2.49324	1.32632	1.41203	2.11151	1.30686	1.15528	1.39335	1.39697	1.43846
ENSG00000247708.8_6	lncRNA	STX18-AS1	0.604327	3.25656e-05	0.000269933	1	0.000251992	0.998302	0.999271	0	8.63857	4.9978	5.5475	7.98921	6.06695	5.33591	8.7209	5.59744	5.76366	0.40589	0.234826	0.260654	0.37538	0.285061	0.250713	0.409759	0.263001	0.27081
ENSG00000131591.17_7	protein_coding	C1orf159	0.190955	0.053562	0.115126	0	0.0982308	0.304175	0.52797	0	30.4735	25.4388	25.0401	28.4111	24.8095	22.6662	25.2386	28.6628	26.1352	4.82023	4.02385	3.96078	4.494	3.92431	3.58529	3.99219	4.53381	4.13401
ENSG00000272141.1_6	lncRNA	AL390719.2	0.656364	0.0204111	0.0533126	0	0.0376403	0.892224	0.948508	0	3.9748	1.64927	1.8322	4.21902	2.65429	2.14349	3.75403	3.47428	3.62713	4.02715	1.671	1.85633	4.27459	2.68925	2.17172	3.80347	3.52004	3.6749
ENSG00000160055.19_2	protein_coding	TMEM234	0.447003	0.0180227	0.0483222	0	0.000431858	0.998085	0.999243	0	9.16854	5.09776	4.83498	6.86713	4.71272	5.51834	6.93051	6.94855	6.45927	2.5675	1.42754	1.35396	1.92303	1.31972	1.54532	1.94078	1.94583	1.80881
ENSG00000078808.17_4	protein_coding	SDF4	0.057009	0.352909	0.486004	0	0.0634018	0.302645	0.526455	0	168.797	161.729	155.584	154.443	162.67	156.611	151.778	152.772	144.389	35.5736	34.0841	32.7891	32.5486	34.2824	33.0056	31.987	32.1963	30.4298
ENSG00000181222.16_5	protein_coding	POLR2A	0.321757	0.0043375	0.0154554	0	0.000252446	0.997991	0.999243	0	648.952	568.65	561.061	703.544	471.163	425.961	615.487	535.087	587.893	77.7468	68.1263	67.217	84.287	56.447	51.0316	73.7376	64.1053	70.4316
ENSG00000184163.3_2	protein_coding	C1QTNF12	0.648828	0.0535308	0.11511	0	-0.144571	0.680982	0.832606	0	1.37793	0.649714	1.32326	1.84021	1.19172	0.866516	1.32835	0.820315	0.7453	0.768077	0.36216	0.737601	1.02576	0.664282	0.483008	0.74044	0.457255	0.41544
ENSG00000160087.20_5	protein_coding	UBE2J2	0.117259	0.082102	0.160897	0	0.0426097	0.512748	0.714718	0	69.7445	66.4208	61.9386	65.0357	60.7778	65.5816	69.0741	66.2043	60.2699	14.8015	14.0961	13.1449	13.8022	12.8985	13.918	14.6592	14.0501	12.7907
ENSG00000081026.19_4	protein_coding	MAGI3	-0.405517	0.000224924	0.00133851	0	-0.000203922	0.998135	0.999243	0	13.7263	17.5923	18.4238	13.4201	18.3092	17.7408	15.0739	19.8806	19.6759	1.63137	2.09083	2.18966	1.59497	2.17604	2.10848	1.79152	2.3628	2.33847
ENSG00000131584.19_3	protein_coding	ACAP3	0.141457	0.146883	0.253005	0	-0.122194	0.211043	0.42194	0	59.569	40.6821	48.7569	58.4828	48.6981	48.2057	49.1489	50.0875	54.8541	6.84151	4.67234	5.59974	6.71676	5.59298	5.53642	5.64476	5.75255	6.3
ENSG00000150967.18_7	protein_coding	ABCB9	0.476273	1.29315e-05	0.000122854	0	-0.000300561	0.997163	0.998755	0	22.1529	16.0429	15.4719	19.5242	13.8131	15.3237	22.1776	15.8755	15.0054	1.66676	1.20705	1.16409	1.46898	1.03928	1.15293	1.66862	1.19446	1.12899
ENSG00000127054.20_3	protein_coding	INTS11	0.0545202	0.406858	0.537425	0	-0.0928298	0.166158	0.363638	0	135.673	111.901	133.242	129.712	117.33	118.348	124.865	123.144	124.316	16.5053	13.6132	16.2095	15.7801	14.2738	14.3975	15.1904	14.981	15.1236
ENSG00000240731.1_7	lncRNA	AL139287.1	0.00232475	0.99218	0.995107	0	0.117627	0.619944	0.789203	0	4.0278	3.59842	4.12245	5.16157	4.65855	3.01	2.71445	4.82538	4.96867	10.4347	9.32232	10.6799	13.3719	12.0688	7.79793	7.03226	12.501	12.8722
ENSG00000228506.2_7	lncRNA	AL513550.1	0.564334	0.0105681	0.0315555	0	0.000816581	0.996961	0.998691	0	2.11989	1.84919	1.42505	2.42369	1.46257	1.73303	2.42568	1.39936	1.54029	0.819124	0.714523	0.550636	0.936512	0.565134	0.669641	0.93728	0.540711	0.595165
ENSG00000107404.20_5	protein_coding	DVL1	-0.154408	0.0409202	0.0931124	0	-0.150165	0.0460564	0.15756	0	179.184	171.575	190.6	164.766	156.657	177.271	150.219	167.441	182.3	46.1576	44.1975	49.0984	42.4436	40.3548	45.6648	38.6963	43.1326	46.9604
ENSG00000162576.16_2	protein_coding	MXRA8	0.160276	0.267487	0.396722	0	-0.14172	0.336336	0.561117	0	8.58557	5.89741	6.51449	7.04666	5.63359	5.60955	6.58399	6.46601	7.80081	2.37039	1.62822	1.79859	1.94552	1.55538	1.54874	1.81778	1.78521	2.15373
ENSG00000103024.7_3	protein_coding	NME3	0.237335	0.00580272	0.0194425	0	-0.000461924	0.995261	0.998024	0	53.0503	44.6304	42.446	48.8329	39.1101	43.1434	47.8205	43.1389	41.389	36.713	30.8861	29.3744	33.7944	27.0658	29.857	33.0938	29.8539	28.6429
ENSG00000108349.17_4	protein_coding	CASC3	0.320461	5.56229e-06	5.96355e-05	0	-0.000303179	0.995326	0.998024	0	154.169	127.894	126.32	151.571	119.66	123.41	157.496	123.24	121.186	24.21	20.0838	19.8367	23.8019	18.7908	19.3797	24.7324	19.3531	19.0304
ENSG00000114654.7_2	protein_coding	EFCC1	0.530667	0.00170278	0.00718605	0	0.000941673	0.995107	0.998012	0	5.82971	3.34853	3.61351	4.75762	3.57516	3.83091	5.25564	4.00507	3.47807	1.97953	1.13702	1.227	1.61549	1.21398	1.30082	1.7846	1.35996	1.18101
ENSG00000242485.6_3	protein_coding	MRPL20	-0.0509497	0.425393	0.554688	0	-0.133896	0.0460965	0.15756	0	84.3188	78.2156	88.251	80.7897	80.8204	88.6583	88.9993	80.7287	86.1567	30.473	28.2673	31.8941	29.1976	29.2087	32.0413	32.1646	29.1755	31.1372
ENSG00000272455.1_7	lncRNA	AL391244.2	-0.301209	0.0859986	0.166832	0	-0.1171	0.480246	0.688507	0	3.02085	3.74835	4.32603	2.78276	3.79184	3.69409	3.86954	3.37777	3.82587	1.98349	2.46116	2.84047	1.82716	2.48972	2.42554	2.54073	2.21784	2.51206
ENSG00000225285.1_5	lncRNA	LINC01770	0.325305	0.318828	0.451611	0	-0.180994	0.598945	0.774982	0	0.953952	0.549758	1.17057	1.66068	1.02921	0.638485	0.924068	0.965077	1.09311	1.12098	0.646014	1.37553	1.95144	1.20942	0.750277	1.08586	1.13405	1.2845
ENSG00000179403.12_5	protein_coding	VWA1	-0.078309	0.36173	0.494533	0	-0.126487	0.148183	0.338258	0	51.9374	54.0262	54.0499	51.6605	49.6189	59.9264	51.7478	46.6132	49.9351	10.2542	10.6666	10.6713	10.1995	9.79644	11.8315	10.2167	9.203	9.85886
ENSG00000121743.4_3	protein_coding	GJA3	0.0159171	0.852977	0.900725	0	0.242966	0.00911381	0.0499701	0	23.7958	25.7387	21.681	21.8132	24.322	21.8453	20.1562	26.9256	21.564	4.56383	4.93646	4.15824	4.18359	4.66474	4.18974	3.86579	5.1641	4.13579
ENSG00000197785.13_5	protein_coding	ATAD3A	-0.0878901	0.241673	0.36851	0	-0.201961	0.0123782	0.0630534	0	92.9043	90.6101	95.9361	94.12	80.6037	99.1933	89.1149	83.9617	98.4293	30.2719	29.5243	31.2597	30.668	26.2638	32.321	29.0371	27.358	32.0721
ENSG00000160075.12_3	protein_coding	SSU72	0.082765	0.229845	0.355204	0	0.0407889	0.548119	0.740758	0	97.1441	96.3076	90.2868	101.436	95.5002	96.3657	94.4282	92.9369	90.082	14.0402	13.9193	13.0491	14.6605	13.8026	13.9277	13.6477	13.4321	13.0195
ENSG00000212123.4_4	protein_coding	PRR22	0.476327	0.00470944	0.0164996	0	-0.00100776	0.994852	0.997895	0	12.6664	8.04646	10.0262	12.4775	7.58368	7.29698	9.87598	9.55426	7.99956	7.08806	4.50278	5.61064	6.98239	4.24381	4.08337	5.52657	5.34653	4.47653
ENSG00000286989.1_1	lncRNA	AL691432.4	0.601858	0.0342162	0.0807293	0	0.369	0.187275	0.389874	0	1.9609	1.29943	1.27236	1.43626	1.35423	1.00333	1.50161	1.49587	0.944047	1.07153	0.71007	0.69528	0.784843	0.740016	0.54827	0.820553	0.817415	0.515873
ENSG00000272106.1_6	lncRNA	AL691432.2	0.0460818	0.85117	0.899476	0	0.0303962	0.901242	0.952874	0	2.0139	2.09908	2.13757	1.88509	1.4084	2.05227	2.25242	2.5092	1.73903	0.988174	1.02997	1.04886	0.924972	0.691069	1.007	1.10521	1.23121	0.853304
ENSG00000155265.11_3	protein_coding	GOLGA7B	-0.777481	0.00188996	0.0078008	-1	-0.00128458	0.994852	0.997895	0	1.53692	2.59886	2.13757	1.70556	3.19598	3.14682	1.79038	2.84698	3.32901	0.224237	0.379174	0.311872	0.248842	0.466294	0.459122	0.261217	0.415374	0.485703
ENSG00000248333.8_3	protein_coding	CDK11B	0.00191082	0.980359	0.987407	0	0.0720532	0.356641	0.579959	0	37.5751	37.8334	34.252	34.7396	34.3432	34.615	31.9959	37.3485	35.3769	11.7166	11.7971	10.6804	10.8324	10.7088	10.7936	9.97689	11.6459	11.0312
ENSG00000167325.15_4	protein_coding	RRM1	-0.195053	0.00147895	0.00640731	0	0.000413241	0.993757	0.99742	0	202.45	248.591	240.833	212.342	239.59	254.345	228.938	248.797	241.577	47.8266	58.7268	56.8941	50.1636	56.6006	60.0863	54.0841	58.7755	57.0698
ENSG00000197386.12_6	protein_coding	HTT	0.368258	0.000287981	0.00165177	0	0.000674556	0.99361	0.997367	0	112.619	87.1117	93.2896	123.474	89.0541	76.9831	115.451	96.3629	102.355	5.68899	4.40047	4.71255	6.2373	4.49859	3.88882	5.83203	4.8678	5.17047
ENSG00000008128.23_5	protein_coding	CDK11A	0.256083	0.105674	0.195938	0	0.162631	0.296971	0.520113	0	6.30668	5.69749	4.93676	5.8797	5.25441	4.37819	4.79361	5.0184	4.96867	1.24025	1.12045	0.970848	1.15628	1.03332	0.861	0.942695	0.986902	0.977123
ENSG00000110880.10_4	protein_coding	CORO1C	-0.333189	2.85592e-06	3.35404e-05	0	-0.000403592	0.993635	0.997367	0	150.141	194.265	186.019	144.255	185.584	197.064	156.745	188.142	185.033	22.9855	29.7404	28.4782	22.0843	28.4114	30.169	23.9965	28.8031	28.3272
ENSG00000186908.14_5	protein_coding	ZDHHC17	-0.663638	4.29224e-06	4.75375e-05	-1	-0.000963896	0.992344	0.996904	0	19.079	35.8342	35.219	27.2441	38.5143	37.6706	22.1776	34.6462	36.0725	2.16807	4.07207	4.00216	3.09592	4.37662	4.28075	2.52019	3.93707	4.09915
ENSG00000158106.14_4	protein_coding	RHPN1	0.356252	0.00385711	0.0139924	0	-0.00110197	0.99204	0.996875	0	75.4682	46.9294	57.1545	77.1991	55.8484	51.6261	61.8548	64.8531	59.1272	18.0373	11.2164	13.6603	18.451	13.3481	12.3389	14.7837	15.5003	14.1317
ENSG00000078369.18_3	protein_coding	GNB1	-0.0101012	0.837148	0.889022	0	0.0571089	0.253397	0.470852	0	463.78	509.276	478.663	469.972	489.256	493.458	492.413	495.567	463.974	72.2736	79.3636	74.5929	73.2386	76.2437	76.8986	76.7357	77.2272	72.3039
ENSG00000178821.13_4	protein_coding	TMEM52	0.222194	0.0230058	0.0586551	0	-0.1848	0.0598067	0.187706	0	18.4961	13.594	15.3701	17.1454	13.5423	15.0956	17.8461	13.1733	15.3532	11.56	8.49626	9.60633	10.7159	8.46393	9.43476	11.1538	8.23331	9.59574
ENSG00000142609.18_4	protein_coding	CFAP74	-0.20037	0.396099	0.52649	0	-0.028638	0.90057	0.952718	0	1.69591	3.04866	2.23936	2.64811	2.05843	2.50834	2.0214	2.12317	2.63339	0.162724	0.292521	0.214868	0.254088	0.197508	0.240677	0.193955	0.20372	0.252676
ENSG00000187730.9_3	protein_coding	GABRD	-0.132263	0.220945	0.345034	0	-0.139161	0.198173	0.403994	0	12.2954	12.3446	15.1666	12.6571	11.5922	12.7241	11.7819	12.6425	12.4714	2.22541	2.23431	2.74508	2.29087	2.09814	2.30301	2.13247	2.28824	2.25726
ENSG00000067606.17_5	protein_coding	PRKCZ	0.078124	0.383161	0.514794	0	0.0152258	0.863889	0.934892	0	27.9826	24.939	26.1089	24.2369	24.647	26.4059	28.1841	27.1669	23.4521	3.63646	3.24094	3.39296	3.1497	3.20298	3.43157	3.66265	3.53046	3.04771
ENSG00000148218.16_4	protein_coding	ALAD	0.55076	1.1722e-07	2.21414e-06	0	0.000712116	0.991774	0.996747	0	28.6716	19.3415	19.8488	28.5008	20.4218	19.2002	29.9745	19.7358	20.4212	5.79809	3.91132	4.01392	5.76356	4.12978	3.88274	6.06157	3.99106	4.12967
ENSG00000162585.17_4	protein_coding	FAAP20	0.117538	0.149957	0.257245	0	-0.0291868	0.714696	0.852634	0	50.1885	45.2801	47.1283	50.4038	42.7395	44.2379	47.3008	45.5999	45.0658	4.5977	4.14805	4.31736	4.61743	3.9153	4.05258	4.33316	4.17734	4.12842
ENSG00000157933.10_3	protein_coding	SKI	0.0989566	0.0723542	0.145789	0	0.0903377	0.0983986	0.26036	0	132.493	133.091	122.35	133.258	125.943	117.162	123.421	127.921	124.018	20.228	20.3193	18.6794	20.3448	19.228	17.8873	18.8429	19.5299	18.934
ENSG00000133641.18_3	protein_coding	C12orf29	-0.379817	0.00010423	0.000705511	0	-0.000802759	0.991619	0.996661	0	25.5977	33.7851	32.0635	26.8401	34.8308	37.9443	28.1263	36.0939	34.6813	4.00277	5.28306	5.01384	4.19705	5.44656	5.93343	4.39818	5.64408	5.42319
ENSG00000211584.14_4	protein_coding	SLC48A1	0.336924	0.000526096	0.00272802	0	-0.000942668	0.990928	0.996412	0	31.4274	23.1898	25.2437	29.5331	24.8636	25.129	29.5124	23.5479	21.2162	6.39809	4.72105	5.13918	6.01245	5.06182	5.11583	6.00823	4.79395	4.31926
ENSG00000158887.16_6	protein_coding	MPZ	0.933208	0.00141073	0.00617102	1	-0.00324936	0.99059	0.996251	0	3.49782	1.99912	2.39204	3.50089	2.16677	1.55061	4.33157	1.73714	1.98747	1.62689	0.929824	1.11258	1.62832	1.0078	0.721213	2.01468	0.807971	0.924403
ENSG00000157916.20_5	protein_coding	RER1	0.0982005	0.077648	0.154089	0	0.0353107	0.510131	0.712307	0	134.348	121.047	119.602	131.283	126.16	128.199	130.467	131.974	122.18	23.6154	21.2773	21.0234	23.0767	22.1761	22.5345	22.9332	23.1981	21.4765
ENSG00000241316.8_6	lncRNA	SUCLG2-AS1	0.801175	0.00242213	0.00953456	1	0.00303612	0.990413	0.996142	0	2.91485	1.64927	1.37415	2.46858	1.84175	1.68743	2.59894	1.10984	1.4906	0.26208	0.148289	0.123552	0.221954	0.165595	0.15172	0.233676	0.0997876	0.134023
ENSG00000163006.12_6	protein_coding	CCDC138	0.202398	0.0092108	0.0282811	0	-0.000942559	0.989454	0.995574	0	22.8419	20.7909	21.4266	25.9874	21.3968	21.1612	24.1413	21.2799	20.9181	3.94097	3.5871	3.69679	4.48367	3.69165	3.65101	4.16516	3.67149	3.60906
ENSG00000007541.16_4	protein_coding	PIGQ	0.46338	0.000451178	0.00239991	0	-0.00161712	0.988645	0.995127	0	19.45	13.1442	13.3852	19.3895	13.9215	13.2714	18.4814	14.4761	14.9557	2.46078	1.66298	1.69348	2.45313	1.76132	1.67907	2.33823	1.8315	1.89217
ENSG00000100036.13_4	protein_coding	SLC35E4	0.459743	0.000578289	0.00295408	0	-0.00180526	0.987618	0.994953	0	10.3345	7.99648	7.88864	10.7271	7.58368	7.75304	11.8396	8.2514	8.24799	1.91308	1.48028	1.46032	1.98576	1.40387	1.43522	2.19171	1.52747	1.52684
ENSG00000157870.16_5	protein_coding	PRXL2B	0.0896804	0.22221	0.346558	0	0.150302	0.0474477	0.16062	0	49.8175	57.8246	48.6551	52.648	53.1941	51.3981	52.1521	50.2805	45.2149	14.7783	17.1535	14.4334	15.6179	15.7799	15.2471	15.4708	14.9156	13.4129
ENSG00000183864.5_4	protein_coding	TOB2	0.2408	0.000133984	0.000867441	0	0.000788898	0.987654	0.994953	0	127.141	105.354	106.115	121.274	102.759	101.2	118.743	102.781	103.448	29.2883	24.2694	24.4448	27.937	23.6717	23.3126	27.3538	23.6767	23.8304
ENSG00000184992.11_4	protein_coding	BRI3BP	0.206431	0.00243952	0.00958257	0	-0.00097059	0.987047	0.994768	0	144.206	137.789	125.404	143.402	119.01	126.831	147.042	119.573	124.415	21.5136	20.5564	18.7086	21.3937	17.7547	18.9215	21.9368	17.8387	18.5612
ENSG00000241990.5_7	lncRNA	PRR34-AS1	0.405086	0.0140616	0.0396258	0	-0.00259403	0.986815	0.994718	0	5.40573	3.79833	4.5805	5.43087	3.95435	3.83091	4.44708	3.81205	3.17995	4.94577	3.47514	4.19076	4.96877	3.61789	3.50495	4.06869	3.4877	2.90938
ENSG00000162591.16_3	protein_coding	MEGF6	0.0815944	0.449113	0.577214	0	0.141643	0.19424	0.398968	0	47.3796	38.8829	41.8862	43.5816	43.3895	34.9343	34.6526	48.8811	42.2337	5.25215	4.31026	4.64318	4.83112	4.80983	3.87255	3.84132	5.41859	4.68171
ENSG00000123992.19_5	protein_coding	DNPEP	-0.0265787	0.669217	0.763196	0	0.17717	0.00910958	0.049966	0	66.7766	75.2669	69.8781	65.0806	76.541	67.6339	68.7276	79.088	66.7292	14.0494	15.8357	14.7019	13.6925	16.1037	14.2297	14.4598	16.6396	14.0394
ENSG00000116213.16_3	protein_coding	WRAP73	-0.027848	0.680927	0.772399	0	0.141698	0.046119	0.1576	0	72.3944	79.9648	69.929	66.2027	72.2617	72.4681	67.0527	78.9433	67.1764	9.48315	10.4748	9.16021	8.67208	9.46577	9.49281	8.78343	10.341	8.79963
ENSG00000114861.20_6	protein_coding	FOXP1	-1.03065	0.000330544	0.00185532	-1	-0.00345786	0.986849	0.994718	0	1.16594	2.24901	1.8322	1.21185	2.65429	2.91879	0.981823	2.02666	2.13653	0.0317574	0.0612576	0.0499047	0.0330077	0.0722964	0.0795008	0.0267425	0.0552013	0.0581938
ENSG00000235169.8_6	protein_coding	SMIM1	0.158443	0.575949	0.68741	0	0.0359086	0.906101	0.95468	0	0.900955	1.09952	0.661628	0.98743	0.812537	1.09455	1.03958	0.772061	0.844674	0.918404	1.12081	0.674443	1.00655	0.828275	1.11575	1.05971	0.787015	0.861033
ENSG00000130764.10_3	protein_coding	LRRC47	-0.113194	0.100349	0.18845	0	0.0227238	0.731154	0.864009	0	94.2293	102.355	95.6816	84.6497	92.8459	96.913	81.087	90.4759	88.5914	20.898	22.7001	21.2201	18.7735	20.5912	21.4932	17.9834	20.0656	19.6477
ENSG00000272153.1_6	lncRNA	AL365330.1	0.599524	0.0541909	0.1162	0	0.0909447	0.772956	0.887508	0	1.05995	0.599736	0.610734	1.39138	0.975045	0.729698	0.981823	0.868569	0.944047	1.99613	1.12945	1.15016	2.6203	1.83624	1.3742	1.84901	1.63572	1.77787
ENSG00000116198.13_4	protein_coding	CEP104	0.0738555	0.220836	0.344926	0	-0.129569	0.0401817	0.143216	0	55.4882	47.9789	54.6098	54.8473	48.2647	50.3035	55.3286	47.6265	52.5188	7.0497	6.09565	6.9381	6.96827	6.13197	6.391	7.02942	6.05089	6.67245
ENSG00000169598.15_3	protein_coding	DFFB	-0.148412	0.0613415	0.127866	0	-0.165156	0.0392837	0.141056	0	21.3049	20.2911	22.19	19.5691	21.1801	23.5327	20.7338	19.398	22.4584	5.50515	5.24317	5.73385	5.05661	5.4729	6.08081	5.35757	5.01241	5.8032
ENSG00000198912.11_3	protein_coding	C1orf174	0.0282406	0.669683	0.763545	0	-0.0421683	0.52614	0.724124	0	49.8175	47.1293	48.248	46.2297	44.7437	47.932	47.243	44.5383	44.2708	11.3531	10.7405	10.9954	10.5355	10.1968	10.9234	10.7664	10.15	10.0891
ENSG00000131697.18_5	protein_coding	NPHP4	-0.0959652	0.222417	0.346769	0	-0.105013	0.183197	0.385896	0	24.4848	24.5392	29.1625	27.9173	26.2179	25.6306	26.2204	27.4564	29.4145	1.85956	1.86369	2.21482	2.12025	1.99118	1.94658	1.99138	2.08525	2.23396
ENSG00000111817.17_7	protein_coding	DSE	0.4135	4.28969e-06	4.75375e-05	0	0.00109732	0.986789	0.994718	0	50.7184	34.8847	34.8118	48.025	37.5392	37.2146	48.3403	38.0723	38.3581	2.64255	1.81757	1.81378	2.50221	1.95588	1.93897	2.51864	1.98365	1.99855
ENSG00000116254.18_4	protein_coding	CHD5	0.138402	0.169706	0.282545	0	-0.262868	0.0165259	0.0770801	0	15.1042	11.295	14.454	15.7989	10.238	12.5417	14.3808	12.739	14.2601	1.49636	1.11898	1.43194	1.56518	1.01426	1.24249	1.42469	1.26204	1.41273
ENSG00000139289.13_3	protein_coding	PHLDA1	-2.58277	1.32333e-19	2.67176e-16	-1	-0.000978698	0.986596	0.994718	0	72.8713	453.7	447.006	79.6677	477.989	488.989	80.625	464.395	460.943	9.03102	56.2276	55.398	9.8733	59.2377	60.6009	9.99194	57.553	57.1252
ENSG00000177728.17_7	protein_coding	TMEM94	0.18989	0.00836163	0.026107	0	-0.00113543	0.986155	0.994424	0	97.3031	76.3664	79.3445	90.4845	86.3998	79.4458	88.4796	79.3293	83.4239	10.7577	8.44294	8.77219	10.0038	9.55222	8.7834	9.78215	8.77051	9.22321
ENSG00000172508.10_3	protein_coding	CARNS1	2.13536	1.13292e-07	2.14839e-06	1	0.00568228	0.986069	0.994406	0	3.44483	0.74967	0.814312	4.84738	0.65003	1.09455	3.63852	1.30285	0.794987	0.607553	0.132217	0.143618	0.854918	0.114644	0.193042	0.641714	0.22978	0.140209
ENSG00000225077.3_4	lncRNA	LINC00337	0.259353	0.266516	0.395635	0	0.217794	0.349314	0.572965	0	1.9079	2.19903	1.47594	2.06463	2.16677	2.18909	2.31017	1.73714	1.54029	0.80912	0.932584	0.625929	0.875584	0.9189	0.928369	0.979716	0.7367	0.653218
ENSG00000158292.7_3	protein_coding	GPR153	0.00428304	0.975732	0.983845	0	0.0957844	0.494426	0.699859	0	7.15464	7.4967	6.26002	5.65528	6.01278	6.33925	5.94869	6.41776	6.06178	1.7043	1.78578	1.49119	1.34714	1.4323	1.51006	1.41703	1.52877	1.44397
ENSG00000097021.19_3	protein_coding	ACOT7	-0.118742	0.158034	0.267944	0	0.0596281	0.467125	0.67804	0	101.119	110.751	106.624	98.743	112.13	112.647	92.0603	107.606	97.7337	24.5196	26.8553	25.8545	23.9435	27.1897	27.315	22.3231	26.0926	23.6988
ENSG00000178988.11_3	protein_coding	MRFAP1L1	0.237271	0.000889473	0.00420026	0	-0.00108478	0.985836	0.99431	0	77.3761	66.4208	65.4503	81.0141	70.7449	73.289	84.7255	68.9065	67.3751	35.7395	30.6793	30.2311	37.4199	32.6766	33.8517	39.1342	31.8275	31.1202
ENSG00000187017.17_6	protein_coding	ESPN	0.111036	0.150309	0.257705	0	0.0281638	0.708285	0.848369	0	70.4865	66.7706	66.7227	76.9747	65.7072	62.8908	63.7607	67.2176	66.282	10.139	9.60452	9.59762	11.0723	9.45155	9.04644	9.17157	9.66881	9.53424
ENSG00000215788.10_6	protein_coding	TNFRSF25	0.277994	0.0635659	0.131508	0	0.178696	0.222326	0.435547	0	23.9018	19.3415	17.8131	22.7109	20.0426	14.3203	19.9252	22.7758	22.9552	5.58062	4.51587	4.15902	5.30257	4.67957	3.34352	4.65217	5.31772	5.35962
ENSG00000171680.21_3	protein_coding	PLEKHG5	-0.0805784	0.374212	0.506401	0	0.120323	0.186056	0.388434	0	40.7549	41.9815	41.5808	41.2925	45.6646	36.8041	36.5585	48.8329	47.3017	5.77838	5.95229	5.89548	5.8546	6.47449	5.21822	5.18339	6.9237	6.70661
ENSG00000162408.11_3	protein_coding	NOL9	0.090246	0.153611	0.262246	0	0.00953781	0.876894	0.941902	0	87.0746	80.9644	81.0749	85.5025	80.5495	73.289	82.5309	79.7636	85.4114	11.9756	11.1352	11.1504	11.7594	11.0782	10.0796	11.3507	10.9701	11.7469
ENSG00000204859.13_4	protein_coding	ZBTB48	0.132052	0.130251	0.230716	0	0.0474103	0.577831	0.761001	0	25.1207	20.9908	21.681	24.2369	21.5052	21.1156	21.7156	24.5612	22.1603	5.57001	4.65427	4.80733	5.37404	4.76833	4.68196	4.81499	5.44594	4.91358
ENSG00000137857.17_3	protein_coding	DUOX1	0.249104	0.00825606	0.0258333	0	-0.00156655	0.985577	0.994188	0	17.9661	16.1429	14.6576	18.8958	15.3299	14.4115	18.6546	15.2	17.6885	2.04532	1.83776	1.66867	2.15116	1.7452	1.64066	2.12371	1.73041	2.01371
ENSG00000116273.6_3	protein_coding	PHF13	-0.0809952	0.202913	0.323706	0	-0.0363403	0.559694	0.748419	0	49.2875	52.227	54.4062	53.411	54.8734	56.5972	53.8847	54.4303	54.6057	13.5704	14.3797	14.9797	14.7057	15.1083	15.5829	14.8361	14.9863	15.0346
ENSG00000041988.15_5	protein_coding	THAP3	0.0804205	0.388203	0.519198	0	0.0435421	0.638175	0.802221	0	16.9591	16.7926	16.6425	15.8438	14.734	13.773	15.1894	15.2482	15.0551	4.16482	4.12392	4.08706	3.8909	3.61837	3.38238	3.7302	3.74465	3.69722
ENSG00000007923.16_4	protein_coding	DNAJC11	0.0164406	0.768381	0.83845	0	-0.0808288	0.159343	0.353983	0	95.5542	80.6645	91.6101	89.4522	86.6707	91.8507	91.4828	91.055	89.8335	18.7988	15.8695	18.0228	17.5983	17.0511	18.0702	17.9978	17.9136	17.6733
ENSG00000171735.19_4	protein_coding	CAMTA1	0.085533	0.394135	0.524749	0	0.197104	0.0572873	0.182618	0	16.2172	18.192	15.2174	19.7037	21.7218	18.3337	18.3659	18.9155	17.6388	1.6376	1.83702	1.53665	1.98967	2.19346	1.85132	1.85458	1.91008	1.78115
ENSG00000049245.13_4	protein_coding	VAMP3	-0.105984	0.0828997	0.16215	0	0.0154052	0.79208	0.897637	0	101.384	110.601	111.306	108.707	124.752	120.035	112.332	115.423	115.571	37.0962	40.4688	40.7268	39.7757	45.6464	43.9207	41.1021	42.2331	42.2873
ENSG00000132467.4_3	protein_coding	UTP3	-0.190478	0.00241562	0.00952099	0	-0.157711	0.0090748	0.0497941	0	64.1798	62.8723	71.7103	60.7269	67.0072	74.0643	66.1287	65.4322	72.0457	31.7722	31.1249	35.5002	30.0628	33.1719	36.6655	32.737	32.3922	35.6662
ENSG00000116288.13_4	protein_coding	PARK7	-0.0306219	0.601092	0.708434	0	-0.019556	0.737768	0.867137	0	203.934	213.956	205.715	204.802	205.843	223.287	209.244	202.907	202.125	85.0787	89.2599	85.8221	85.441	85.8752	93.1529	87.294	84.6505	84.3243
ENSG00000284747.1_4	lncRNA	AL034417.4	0.204422	0.481181	0.605347	0	-0.431969	0.173925	0.373666	0	2.64987	1.04954	1.52683	1.84021	1.19172	1.14015	1.15509	1.39936	2.28559	0.643797	0.25499	0.370951	0.447087	0.289534	0.277005	0.280633	0.339981	0.555293
ENSG00000167333.13_5	protein_coding	TRIM68	0.275441	0.0170756	0.0462414	0	-0.00198103	0.985442	0.994122	0	12.8784	12.9443	12.4691	15.0807	9.85879	11.3103	14.2076	11.9669	11.1298	3.02735	3.04286	2.93116	3.54508	2.31753	2.65875	3.33981	2.81311	2.61632
ENSG00000162426.14_3	protein_coding	SLC45A1	-0.179471	0.231812	0.357479	0	0.137804	0.339579	0.563831	0	4.55777	5.59754	5.39481	4.5332	5.41692	5.1991	4.56259	5.98347	4.86929	1.57818	1.93821	1.86801	1.56967	1.87566	1.80024	1.57984	2.07184	1.68604
ENSG00000215067.10_7	lncRNA	ALOX12-AS1	0.636487	0.00589714	0.0196995	1	-0.00416734	0.984952	0.993824	0	2.75586	1.94914	1.62862	3.00717	2.05843	1.55061	2.94547	1.59238	2.43465	0.425747	0.301119	0.251603	0.464572	0.318002	0.23955	0.455039	0.246003	0.376124
ENSG00000074800.16_7	protein_coding	ENO1	-0.128573	0.037521	0.0869545	0	-0.0672389	0.255866	0.473325	0	2633.01	2784.87	2839.25	2509.24	2668.32	2884.63	2621.18	2647.35	2763.13	504.796	533.91	544.335	481.066	511.564	553.035	502.526	507.544	529.74
ENSG00000261655.1_6	lncRNA	AC100803.2	1.06386	0.0103792	0.0311075	1	0.00829475	0.984463	0.993626	0	2.49087	0.549758	1.62862	2.01974	1.4084	0.592879	1.61712	1.01333	0.7453	1.26891	0.28006	0.82966	1.02891	0.717472	0.302027	0.8238	0.516215	0.379674
ENSG00000180758.12_4	protein_coding	GPR157	-0.108576	0.206523	0.328195	0	-0.0422571	0.614124	0.784772	0	17.9131	18.4919	16.6934	17.1903	16.9008	19.5194	15.4204	17.5644	18.2847	3.37728	3.4864	3.14732	3.241	3.18642	3.68013	2.90731	3.31154	3.44734
ENSG00000249492.2_7	lncRNA	AC114956.3	0.880458	0.0045708	0.0161315	1	0.00611353	0.984136	0.993626	0	1.80191	0.799648	0.559839	1.66068	0.975045	0.82091	1.27059	0.820315	1.19248	0.569504	0.252733	0.17694	0.524867	0.308168	0.259453	0.401578	0.259265	0.37689
ENSG00000234546.4_5	lncRNA	LNCTAM34A	0.934068	0.0275021	0.0676698	0	1.05396	0.0131601	0.0658052	0	0.741963	1.44936	0.356261	1.43626	1.08338	0.547273	0.635297	0.6273	0.59624	0.34655	0.676956	0.166399	0.670837	0.506017	0.255616	0.296729	0.292994	0.278487
ENSG00000100836.10_5	protein_coding	PABPN1	0.205131	0.00232889	0.00926357	0	0.0011443	0.984549	0.993626	0	125.021	103.804	107.896	125.269	111.643	106.262	124.229	109.729	110.752	32.2551	26.7813	27.837	32.3191	28.8036	27.4154	32.0509	28.3099	28.5737
ENSG00000171621.14_3	protein_coding	SPSB1	-0.211889	0.043685	0.0979307	0	0.0300744	0.757344	0.878062	0	11.3944	16.2429	13.9451	13.6445	15.384	16.2358	13.9188	14.4761	14.906	3.36218	4.79282	4.11481	4.02611	4.5394	4.79073	4.10705	4.27151	4.39835
ENSG00000138801.9_3	protein_coding	PAPSS1	-0.208917	0.002045	0.0083084	0	0.00113859	0.984503	0.993626	0	75.7862	95.2581	91.1011	83.0788	93.7668	96.6849	80.5672	88.0632	88.9888	23.2473	29.2203	27.9451	25.4843	28.7628	29.658	24.7139	27.0133	27.2972
ENSG00000188807.13_4	protein_coding	TMEM201	-0.00748115	0.911555	0.940155	0	-0.0389319	0.565074	0.752407	0	70.5395	66.4208	65.1449	68.9855	65.9239	70.5982	61.5083	64.5154	66.4311	10.1045	9.51451	9.33175	9.88189	9.44333	10.1129	8.81082	9.24157	9.51599
ENSG00000184445.12_4	protein_coding	KNTC1	0.10319	0.220168	0.344304	0	-0.238913	0.00906858	0.0497789	0	117.018	86.0621	107.998	126.122	99.1837	105.396	117.761	99.5959	122.776	10.3327	7.59931	9.53625	11.1366	8.75795	9.30646	10.3983	8.79434	10.8411
ENSG00000231789.2_6	lncRNA	PIK3CD-AS2	-0.179056	0.241366	0.368175	0	0.258818	0.084011	0.234908	0	4.29278	6.5971	4.47871	3.9946	4.60438	5.2447	4.62034	6.17649	4.81961	4.57165	7.02566	4.76966	4.2541	4.90349	5.58541	4.92049	6.57773	5.1327
ENSG00000171603.17_3	protein_coding	CLSTN1	0.070428	0.210509	0.333061	0	-0.0827142	0.144992	0.333022	0	273.042	261.285	269.028	267.1	235.365	254.801	281.032	241.703	258.172	48.0454	45.9766	47.3391	46.9998	41.4156	44.8357	49.4514	42.531	45.4288
ENSG00000178585.15_3	protein_coding	CTNNBIP1	0.0345922	0.727285	0.807777	0	0.0730975	0.46192	0.673262	0	18.0191	17.5923	18.0675	18.5368	19.2842	17.7864	17.153	18.3847	16.645	5.39655	5.26872	5.41106	5.55159	5.77545	5.32686	5.13717	5.50605	4.98504
ENSG00000162441.12_3	protein_coding	LZIC	-0.00260603	0.961728	0.974491	0	-0.0632746	0.253239	0.470781	0	58.827	57.5247	59.9028	59.3805	57.2568	58.9687	57.6388	53.8995	57.3384	10.7762	10.5376	10.9732	10.8775	10.4885	10.8021	10.5585	9.87352	10.5035
ENSG00000114503.11_5	protein_coding	NCBP2	-0.20342	0.000455575	0.00241884	0	-0.000960149	0.984094	0.993626	0	97.7271	110.451	111.662	95.9154	114.405	110.732	96.9117	109.488	112.143	19.1209	21.6105	21.8475	18.7665	22.3841	21.6654	18.9614	21.422	21.9415
ENSG00000162444.12_3	protein_coding	RBP7	-0.0240218	0.788513	0.853307	0	0.0344053	0.699425	0.843548	0	19.185	19.0916	17.1514	17.0107	19.6092	19.4738	19.2899	18.9638	19.6262	22.2564	22.148	19.8973	19.734	22.7485	22.5914	22.3781	21.9997	22.7683
ENSG00000130939.19_5	protein_coding	UBE4B	0.0817929	0.203772	0.324789	0	-0.0570897	0.370808	0.592858	0	97.5151	101.655	98.4808	104.219	88.4582	91.8507	107.885	91.0067	102.255	10.6831	11.1366	10.7889	11.4175	9.69087	10.0625	11.8191	9.97006	11.2024
ENSG00000104147.9_3	protein_coding	OIP5	0.36151	0.0011744	0.00529451	0	-0.00215875	0.982379	0.992748	0	18.2841	14.1938	14.1996	16.2477	15.2215	14.9588	20.7338	13.4146	13.6638	15.224	11.8183	11.8231	13.5285	12.674	12.4553	17.2638	11.1695	11.3771
ENSG00000142657.21_4	protein_coding	PGD	-0.0917117	0.0982756	0.185291	0	0.0962926	0.0833187	0.233788	0	330.067	377.584	347.864	317.504	372.142	361.018	335.957	370.589	339.062	99.0301	113.287	104.37	95.2606	111.654	108.316	100.797	111.188	101.729
ENSG00000175279.22_4	protein_coding	CENPS	0.11676	0.485427	0.609456	0	0.0775396	0.642195	0.80517	0	5.03475	4.19815	4.32603	4.03949	5.68776	4.05894	5.65992	4.3911	5.11773	2.88029	2.40169	2.47485	2.31092	3.25387	2.32205	3.23794	2.51207	2.92776
ENSG00000160049.12_3	protein_coding	DFFA	-0.0568521	0.320876	0.453638	0	0.0305986	0.588761	0.767725	0	139.595	149.384	142.148	129.129	136.019	140.923	131.969	140.226	133.657	21.0709	22.5486	21.4563	19.4912	20.5311	21.2714	19.9198	21.1661	20.1747
ENSG00000142655.13_3	protein_coding	PEX14	0.0920442	0.21067	0.333244	0	0.0869221	0.235554	0.451567	0	29.7315	27.9377	26.3124	26.7953	27.3013	25.8131	25.8162	26.8291	25.1415	10.1403	9.52855	8.97423	9.1389	9.31148	8.80391	8.80497	9.15045	8.57485
ENSG00000131115.16_4	protein_coding	ZNF227	-0.280959	0.00641491	0.0210634	0	-0.00224156	0.98025	0.991727	0	13.8853	16.2429	15.7264	13.7343	15.7091	17.3759	13.63	18.0469	16.9928	2.73926	3.20435	3.10246	2.70946	3.09904	3.42788	2.6889	3.56025	3.35231
ENSG00000120948.17_6	protein_coding	TARDBP	-0.0274037	0.599121	0.70729	0	-0.0974887	0.0730466	0.214429	0	147.598	143.387	147.34	152.827	149.074	158.253	155.186	141.577	158.699	24.3119	23.6183	24.2694	25.1733	24.555	26.0671	25.5618	23.3202	26.1405
ENSG00000009724.16_2	protein_coding	MASP2	0.55145	0.0197374	0.0519669	0	-0.115043	0.624926	0.793028	0	2.33188	1.54932	2.03578	3.63554	1.78758	1.64182	2.13691	1.83365	1.93778	0.548549	0.36446	0.478894	0.855219	0.420509	0.38622	0.502684	0.431344	0.455841
ENSG00000271895.2_8	lncRNA	AL109811.2	0.663712	0.0517292	0.111987	0	0.208952	0.542771	0.736504	0	1.21894	0.449802	0.661628	1.03231	1.08338	0.775304	1.32835	1.06158	0.794987	1.40108	0.517014	0.760492	1.18657	1.24527	0.891154	1.52684	1.22021	0.913778
ENSG00000174460.4_3	protein_coding	ZCCHC12	0.761845	0.00349614	0.0129374	1	0.00643262	0.979479	0.991266	0	2.27889	1.64927	1.22147	2.42369	1.30006	1.23136	2.13691	1.10984	1.58997	1.03727	0.750694	0.555971	1.10318	0.591743	0.560476	0.972648	0.505161	0.723702
ENSG00000171824.14_4	protein_coding	EXOSC10	-0.00617707	0.898155	0.932063	0	-0.0785008	0.116402	0.290724	0	138.535	130.143	137.11	141.427	133.581	138.871	136.82	132.746	142.65	23.1239	21.723	22.8859	23.6066	22.297	23.1799	22.8376	22.1576	23.8108
ENSG00000198793.12_5	protein_coding	MTOR	-0.0656373	0.344015	0.477079	0	-0.0411819	0.549382	0.74156	0	172.93	185.219	192.686	166.786	164.512	162.859	173.783	172.411	181.903	14.2694	15.2833	15.8995	13.7623	13.5747	13.4384	14.3397	14.2265	15.0097
ENSG00000120942.13_5	protein_coding	UBIAD1	0.0591049	0.358128	0.490997	0	0.100598	0.124513	0.302499	0	40.172	41.0819	36.8476	37.5672	39.381	39.9966	39.7927	40.3885	35.8241	7.90476	8.08381	7.25061	7.39221	7.74911	7.87024	7.83013	7.94735	7.04921
ENSG00000117305.15_5	protein_coding	HMGCL	-0.329031	0.000420581	0.00226569	0	-0.00195857	0.97941	0.991266	0	18.6021	21.5905	23.7677	19.21	26.272	24.4905	19.4054	23.9822	23.6012	3.30527	3.83627	4.22312	3.41329	4.6681	4.35154	3.44802	4.26122	4.19353
ENSG00000138771.16_5	protein_coding	SHROOM3	-0.594111	2.49385e-07	4.19939e-06	-1	-0.00192979	0.979224	0.991245	0	41.7089	68.0201	66.3664	40.1704	60.1278	60.7017	43.951	61.3306	62.7543	3.01605	4.91865	4.79907	2.9048	4.34795	4.38945	3.17818	4.43493	4.53788
ENSG00000283445.1_6	lncRNA	AL136985.3	5.80227	7.79019e-08	1.56434e-06	1	0.0436716	0.977947	0.990647	0	1.53692	0	0	1.03231	0.0541692	0	1.21284	0	0.0496867	0.324314	0	0	0.217834	0.0114305	0	0.255927	0	0.0104846
ENSG00000116663.11_3	protein_coding	FBXO6	-0.0900242	0.352322	0.485566	0	0.13491	0.163095	0.359387	0	20.775	25.6387	23.6659	21.2746	24.972	21.5261	20.5028	22.5828	21.4646	11.974	14.7774	13.6403	12.262	14.3931	12.407	11.8172	13.016	12.3716
ENSG00000072952.18_5	protein_coding	MRVI1	1.05429	5.99207e-10	2.38872e-08	1	-0.00271775	0.97778	0.990616	0	26.8696	12.4445	12.3674	27.4236	13.5423	13.2258	28.6461	13.8488	14.3098	3.48956	1.61617	1.60615	3.56151	1.75874	1.71763	3.72028	1.79855	1.85841
ENSG00000246985.8_6	lncRNA	SOCS2-AS1	0.837547	0.00805479	0.0253188	1	0.822043	0.00906482	0.0497772	1	0.953952	1.14949	0.712523	1.30161	1.51674	0.775304	1.50161	1.06158	0.59624	0.214806	0.258837	0.160442	0.29309	0.34153	0.174579	0.338125	0.239042	0.134258
ENSG00000177674.16_6	protein_coding	AGTRAP	-0.0966456	0.298724	0.430787	0	0.0501514	0.582147	0.763794	0	30.3675	38.2332	33.5904	32.271	31.4181	35.9376	30.9563	33.9707	30.5573	12.4712	15.7015	13.7948	13.253	12.9027	14.7588	12.7131	13.951	12.5492
ENSG00000177000.12_6	protein_coding	MTHFR	0.116918	0.145114	0.250435	0	0.0719705	0.361507	0.584396	0	22.6299	21.1407	21.0194	19.973	21.6135	18.8353	22.4087	20.1701	20.0237	1.88929	1.76496	1.75484	1.66748	1.80443	1.57249	1.87082	1.68393	1.67171
ENSG00000011021.23_5	protein_coding	CLCN6	0.0327945	0.793011	0.856327	0	0.0921453	0.461685	0.673123	0	24.5378	20.6409	24.3785	25.8078	25.7304	20.1123	23.5637	30.6894	27.9736	3.0023	2.5255	2.9828	3.15769	3.14821	2.46082	2.88312	3.75498	3.42268
ENSG00000285646.2_2	lncRNA	AL021155.2	-0.519788	0.092312	0.176234	0	-0.386133	0.194236	0.398968	0	0.900955	0.849626	0.966995	0.628365	0.866707	1.23136	0.750806	0.772061	1.04342	0.293375	0.276661	0.31488	0.204612	0.282223	0.400965	0.244482	0.251404	0.339766
ENSG00000116685.16_3	protein_coding	KIAA2013	-0.0199502	0.724527	0.805519	0	0.112244	0.0580708	0.18414	0	95.1302	102.305	95.8852	88.3301	100.538	92.8996	90.1544	96.9902	88.5914	28.9943	31.181	29.2244	26.9217	30.6425	28.3144	27.4777	29.5612	27.0013
ENSG00000143353.12_3	protein_coding	LYPLAL1	-0.272285	0.0118691	0.0346307	0	-0.00285633	0.976415	0.990209	0	12.1364	15.3433	15.1157	12.4326	16.0882	15.0956	11.8974	12.6425	13.8626	4.12662	5.21702	5.13963	4.22735	5.47033	5.13282	4.04535	4.29871	4.71356
ENSG00000116688.16_6	protein_coding	MFN2	0.0158524	0.753949	0.827143	0	0.0620627	0.228219	0.442605	0	242.463	247.441	236.15	223.788	237.261	229.034	238.525	242.862	231.788	48.7558	49.7569	47.4865	45.0005	47.7098	46.0555	47.964	48.836	46.6094
ENSG00000082269.16_4	protein_coding	FAM135A	-0.361049	0.000717893	0.00352926	0	0.00267808	0.975732	0.989949	0	20.351	26.3384	26.058	19.2549	25.7304	24.9465	19.6942	24.2234	25.1415	1.9219	2.48734	2.46085	1.81839	2.42991	2.35589	1.85987	2.2876	2.3743
ENSG00000048707.15_6	protein_coding	VPS13D	0.035975	0.714627	0.79808	0	-0.0578221	0.558622	0.747472	0	74.7792	75.7667	84.892	85.7269	74.1576	65.6728	85.1876	80.2944	89.3367	3.60104	3.64859	4.08803	4.12823	3.57111	3.16252	4.10226	3.86663	4.30206
ENSG00000213199.8_5	protein_coding	ASIC3	0.674576	0.00182991	0.00761022	1	-0.00629796	0.974971	0.989792	0	4.50477	2.44892	2.64651	4.84738	2.70846	2.14349	3.4075	2.84698	3.27932	1.63929	0.891165	0.963069	1.76397	0.985611	0.780017	1.23999	1.03602	1.19335
ENSG00000272482.1_6	lncRNA	AC254633.1	0.384645	0.189124	0.306657	0	0.326956	0.263309	0.481781	0	1.21894	0.949582	0.966995	1.25673	1.24589	0.775304	1.21284	1.35111	1.09311	3.53316	2.75241	2.80288	3.64269	3.61128	2.24726	3.51548	3.91625	3.16843
ENSG00000116731.22_4	protein_coding	PRDM2	-0.0677094	0.492021	0.615923	0	-0.144368	0.15318	0.345349	0	23.4778	20.7409	22.8007	24.7306	22.426	23.852	23.3905	24.7542	28.4705	2.14939	1.89883	2.0874	2.26409	2.0531	2.18365	2.1414	2.26625	2.60647
ENSG00000175084.11_3	protein_coding	DES	-2.1808	1.36925e-06	1.76741e-05	-1	-0.00761099	0.974977	0.989792	0	0.317984	2.99868	2.08667	0.583481	2.92513	3.60288	0.981823	2.5092	2.73277	0.129052	1.217	0.846864	0.236803	1.18715	1.46221	0.398467	1.01834	1.10908
ENSG00000175147.13_6	lncRNA	TMEM51-AS1	0.520866	0.144364	0.249512	0	0.10375	0.774963	0.888778	0	1.74891	1.64927	1.67952	1.84021	0.704199	0.456061	1.44386	1.39936	1.44091	0.146071	0.137749	0.140275	0.153697	0.0588156	0.0380908	0.120593	0.116876	0.120347
ENSG00000171729.14_4	protein_coding	TMEM51	-0.155579	0.0536989	0.115368	0	0.148267	0.0596429	0.187314	0	19.344	24.0394	21.8337	18.6265	24.1053	21.4805	20.214	23.5961	21.415	8.64344	10.7415	9.75591	8.32284	10.7709	9.59807	9.03217	10.5434	9.56879
ENSG00000151917.18_4	protein_coding	BEND6	-0.994562	0.000115912	0.000769424	-1	-0.00607254	0.973785	0.989138	0	1.32493	2.84875	2.49383	1.25673	2.92513	3.01	1.44386	2.21968	2.48433	0.236131	0.507708	0.444454	0.223976	0.521321	0.536447	0.257326	0.395594	0.442761
ENSG00000262766.1_7	lncRNA	AC135050.5	1.86949	1.19396e-06	1.57952e-05	1	-0.0126031	0.97368	0.989116	0	2.64987	0.49978	0.916101	2.60322	0.758368	0.547273	2.25242	0.772061	0.59624	4.88005	0.920405	1.68711	4.79415	1.39663	1.00787	4.1481	1.42184	1.09805
ENSG00000132906.18_5	protein_coding	CASP9	0.255249	0.0215741	0.0557549	0	0.188346	0.0807838	0.22917	0	15.1572	13.594	11.7057	12.298	12.5672	10.8086	13.2257	12.5942	11.5273	2.87668	2.58	2.22162	2.33403	2.38513	2.05137	2.5101	2.39025	2.18776
ENSG00000116138.13_3	protein_coding	DNAJC16	0.0602789	0.419288	0.549165	0	0.023842	0.747555	0.872728	0	73.0303	72.0683	69.7763	67.4594	65.8697	63.8485	69.7672	66.9763	68.0211	8.52859	8.41624	8.14858	7.87801	7.69236	7.45633	8.14752	7.82159	7.9436
ENSG00000197312.12_4	protein_coding	DDI2	-0.0632587	0.415661	0.545806	0	-0.0322651	0.675464	0.828294	0	86.1737	94.1086	95.8343	91.3822	93.7668	88.7951	95.2368	90.8137	100.417	7.07618	7.72776	7.86946	7.50387	7.69969	7.29143	7.8204	7.45719	8.24575
ENSG00000116786.13_5	protein_coding	PLEKHM2	-0.123448	0.112434	0.205618	0	0.0343249	0.646419	0.807975	0	70.3805	81.0643	75.1202	64.4523	70.1491	75.6605	66.7639	73.5388	68.7167	17.0248	19.6092	18.1713	15.5908	16.9688	18.302	16.15	17.7888	16.6223
ENSG00000139505.11_2	protein_coding	MTMR6	-0.265533	0.0073997	0.0235677	0	-0.00297073	0.973159	0.988872	0	40.9669	49.3783	48.706	41.6965	52.9233	52.8575	41.9296	47.2405	48.1464	7.08893	8.54443	8.4281	7.21517	9.15786	9.14647	7.25551	8.17451	8.33127
ENSG00000198081.11_4	protein_coding	ZBTB14	-0.325734	0.00413802	0.0148695	0	0.00334016	0.972862	0.988688	0	11.3944	14.6935	12.5709	12.298	14.2465	15.7341	10.2803	13.8971	14.3595	2.74962	3.54574	3.03353	2.96766	3.43786	3.79684	2.48076	3.35355	3.46512
ENSG00000233954.6_2	protein_coding	UQCRHL	0.152216	0.410114	0.540489	0	0.280545	0.131752	0.313465	0	2.22589	2.9487	2.34115	3.00717	2.87097	2.82758	2.6567	2.84698	1.93778	1.02105	1.35262	1.07392	1.37944	1.31696	1.29705	1.21867	1.30595	0.88889
ENSG00000129055.12_2	protein_coding	ANAPC13	-0.319933	8.54314e-05	0.000598767	0	-0.00229709	0.971165	0.987953	0	30.3145	38.8829	37.4074	32.4954	39.3268	39.0844	29.6857	37.252	39.1034	12.8506	16.4828	15.8573	13.7751	16.671	16.5682	12.584	15.7914	16.5763
ENSG00000187866.9_5	protein_coding	FAM122A	0.671397	1.82789e-05	0.000164453	1	0.00451259	0.971174	0.987953	0	12.5604	7.99648	8.65206	14.4524	9.85879	8.52834	13.5145	7.76887	8.29768	2.74544	1.74787	1.89116	3.15899	2.15493	1.86412	2.95399	1.69811	1.8137
ENSG00000116809.11_2	protein_coding	ZBTB17	0.0549548	0.511169	0.633736	0	0.0828287	0.324144	0.548642	0	30.4735	26.7882	26.3633	25.359	28.7097	26.4515	26.1049	27.9872	25.9861	7.18714	6.31798	6.21777	5.9809	6.77114	6.23857	6.15682	6.60076	6.12881
ENSG00000185519.9_3	protein_coding	FAM131C	0.00200365	0.989153	0.993099	0	0.221991	0.136302	0.320719	0	4.92875	5.74747	4.68229	5.6104	5.52525	5.42713	4.50483	6.32125	4.96867	2.86555	3.34155	2.72226	3.26186	3.21236	3.15531	2.61909	3.67515	2.88876
ENSG00000185924.7_4	protein_coding	RTN4RL1	-1.15011	2.3898e-07	4.05437e-06	-1	0.00475791	0.971097	0.987953	0	3.9218	8.89609	8.60117	3.7253	8.55873	10.6262	4.33157	9.11997	7.20457	1.08517	2.46156	2.37996	1.0308	2.36821	2.94029	1.19855	2.52351	1.99352
ENSG00000171295.12_4	protein_coding	ZNF440	-0.715107	6.42587e-07	9.30108e-06	-1	0.0034414	0.970402	0.987927	0	12.2954	19.1916	20.4596	12.0736	22.751	20.4315	12.9947	19.5428	20.3715	1.91308	2.98608	3.18338	1.87857	3.53992	3.17902	2.02189	3.04073	3.16968
ENSG00000237276.8_4	transcribed_unprocessed_pseudogene	ANO7L1	0.120361	0.649158	0.748282	0	0.366625	0.162688	0.358763	0	0.847957	1.39938	0.966995	1.21185	1.35423	0.912122	1.03958	0.965077	0.993734	0.426109	0.703208	0.485927	0.608968	0.680517	0.458353	0.522401	0.484963	0.499364
ENSG00000204377.3	protein_coding	C1orf134	-0.117802	0.649858	0.748631	0	-0.160736	0.537446	0.732027	0	1.74891	1.14949	1.27236	0.98743	1.13755	1.55061	1.03958	1.35111	1.24217	6.94013	4.56149	5.04906	3.91837	4.5141	6.1532	4.12531	5.36154	4.92923
ENSG00000051382.8_2	protein_coding	PIK3CB	-0.17954	0.00736087	0.0234765	0	0.00224977	0.970106	0.987696	0	71.4934	83.2134	86.0117	74.1919	84.7747	84.052	78.7768	86.5191	84.0699	9.10744	10.6004	10.9569	9.4512	10.7993	10.7073	10.0353	11.0215	10.7095
ENSG00000037637.11_4	protein_coding	FBXO42	-0.102821	0.13607	0.238421	0	-0.146789	0.0389246	0.14043	0	34.3953	33.8851	36.1351	32.8545	32.2306	37.7619	34.9413	32.9091	35.7247	3.81788	3.76125	4.011	3.64685	3.57761	4.19157	3.87849	3.65291	3.96545
ENSG00000122218.16_4	protein_coding	COPA	-0.150962	0.00819798	0.0256794	0	0.00195485	0.969746	0.987407	0	232.499	277.078	265.211	241.965	268.083	267.206	252.848	263.418	275.065	30.2418	36.0403	34.4968	31.4731	34.8703	34.7563	32.8887	34.2635	35.7785
ENSG00000157191.20_3	protein_coding	NECAP2	-0.0235327	0.703309	0.789349	0	-0.0858598	0.175399	0.375547	0	50.3475	49.6282	51.0472	47.8455	46.5855	50.0299	49.8997	45.5516	49.3886	9.13747	9.00693	9.26446	8.68339	8.45471	9.07984	9.05621	8.26708	8.96344
ENSG00000071462.11_6	protein_coding	BUD23	-0.272575	8.21407e-05	0.000579644	0	0.00212205	0.968969	0.987165	0	105.2	127.094	124.488	105.341	129.735	131.391	106.095	126.232	126.552	13.2427	15.9988	15.6707	13.2604	16.3312	16.5397	13.3553	15.8902	15.9305
ENSG00000047230.15_4	protein_coding	CTPS2	-0.290976	0.00416154	0.0149354	0	0.00349997	0.968368	0.986991	0	19.132	21.2407	20.5614	17.4147	23.1844	24.8553	18.0771	22.5345	21.2659	3.45906	3.84029	3.71748	3.14856	4.19172	4.49382	3.26832	4.07422	3.84486
ENSG00000198015.13_5	protein_coding	MRPL42	-0.235171	0.000517696	0.00269345	0	-0.00223378	0.968388	0.986991	0	84.3188	99.0064	102.298	89.9908	108.88	108.086	89.2881	102.009	99.8702	5.14327	6.03919	6.23996	5.48925	6.64145	6.59305	5.44639	6.22231	6.09188
ENSG00000077585.14_5	protein_coding	GPR137B	-0.583157	0.000486869	0.0025605	0	0.00535771	0.967585	0.986591	0	3.70981	6.24725	6.4127	4.30879	6.06695	7.25137	4.96687	7.14157	5.71397	1.60807	2.70795	2.77967	1.8677	2.6298	3.1432	2.15296	3.09561	2.4768
ENSG00000186301.8_2	unprocessed_pseudogene	MST1P2	0.260436	0.165365	0.277036	0	-0.0209319	0.910801	0.956954	0	8.58557	5.59754	6.4636	8.7971	6.22945	6.47607	7.68132	8.7822	8.04924	3.74752	2.44327	2.8213	3.83985	2.7191	2.82674	3.35282	3.83335	3.51342
ENSG00000267980.1_6	lncRNA	AC007292.1	1.22323	0.00183841	0.00764336	1	0.0166931	0.966731	0.985967	0	1.48393	0.399824	0.407156	0.942547	0.812537	0.410455	1.27059	0.386031	0.7453	1.98918	0.535957	0.545785	1.26347	1.08919	0.550208	1.70321	0.517467	0.999062
ENSG00000205363.5_3	protein_coding	INSYN1	-1.10189	0.000504146	0.00263756	-1	0.00984061	0.965912	0.985303	0	0.529973	1.39938	1.62862	0.85278	1.4084	1.4594	0.693051	1.73714	1.44091	0.0806288	0.212899	0.247775	0.12974	0.21427	0.222029	0.105439	0.264284	0.219217
ENSG00000116691.11_3	protein_coding	MIIP	-0.376377	0.000824559	0.00394798	0	0.00404163	0.965514	0.985152	0	33.7063	37.1836	39.4941	28.0071	39.2185	36.6673	26.1049	37.9758	37.9109	11.9484	13.181	14	9.92808	13.9023	12.998	9.25379	13.4618	13.4388
ENSG00000128590.5_3	protein_coding	DNAJB9	-0.331395	0.00212945	0.00859825	0	0.00401187	0.965084	0.985084	0	15.6872	18.3919	19.4926	13.6445	18.2008	18.8353	14.092	18.1434	16.2475	6.18093	7.24662	7.68029	5.37608	7.17133	7.42132	5.55242	7.14872	6.40171
ENSG00000228549.4_7	lncRNA	BX284668.2	-0.283771	0.290114	0.421275	0	-0.22866	0.386743	0.608757	0	0.847957	1.29943	1.11968	0.98743	0.758368	1.09455	1.03958	0.916823	1.29185	0.257503	0.394603	0.340018	0.299857	0.230297	0.332386	0.315693	0.278416	0.392303
ENSG00000117122.13_5	protein_coding	MFAP2	-0.062057	0.46485	0.591751	0	0.0520217	0.536075	0.73044	0	30.9504	34.7347	32.4198	29.7576	31.2556	32.8364	29.6279	31.751	29.017	10.6176	11.9159	11.1217	10.2084	10.7223	11.2646	10.164	10.8923	9.95438
ENSG00000160305.18_5	protein_coding	DIP2A	0.174723	0.0170243	0.0461192	0	-0.00300864	0.964633	0.984833	0	59.622	53.9763	58.3251	65.1704	55.7942	53.0399	64.6848	57.7598	56.5931	4.33362	3.92326	4.23936	4.73691	4.0554	3.8552	4.70161	4.19827	4.11347
ENSG00000117118.9_2	protein_coding	SDHB	-0.0849503	0.130979	0.231523	0	-0.0637162	0.250333	0.467645	0	112.089	113.85	119.602	109.784	114.189	122.133	112.217	110.984	112.54	45.5278	46.2429	48.5792	44.5915	46.3804	49.6073	45.5794	45.0787	45.7109
ENSG00000164294.14_3	protein_coding	GPX8	-0.301099	0.000794653	0.00382765	0	-0.0033604	0.964377	0.984833	0	63.3318	75.8666	76.0872	53.8598	69.8782	71.1455	56.5992	67.7484	66.7789	15.6568	18.7557	18.8102	13.3152	17.2752	17.5885	13.9924	16.7487	16.509
ENSG00000197079.8_2	protein_coding	KRT35	4.25008	4.19759e-06	4.66682e-05	1	0.0565458	0.964087	0.984763	0	2.0139	0	0	1.30161	0.108338	0.136818	0.693051	0.0965077	0.0496867	1.13268	0	0	0.732065	0.0609327	0.0769507	0.389793	0.0542788	0.0279453
ENSG00000105287.12_4	protein_coding	PRKD2	-0.245189	0.00355169	0.0131052	0	-0.00342106	0.962966	0.984036	0	63.1728	73.5177	76.3417	59.2907	69.7699	68.0443	60.411	72.8633	72.3935	11.5999	13.4994	14.0179	10.887	12.8112	12.4944	11.0927	13.3792	13.293
ENSG00000091073.19_3	protein_coding	DTX2	-0.339774	0.00802763	0.0252444	0	-0.00529515	0.962617	0.98382	0	17.7541	20.6409	20.2051	15.6193	17.0633	19.337	14.092	22.1003	20.62	3.52124	4.0938	4.00736	3.09785	3.38423	3.83518	2.79493	4.38323	4.08964
ENSG00000179051.14_4	protein_coding	RCC2	-0.000682704	0.988758	0.992886	0	-0.0347074	0.476912	0.685832	0	356.566	366.339	369.545	361.489	350.908	370.595	374.305	349.599	352.676	87.4151	89.8109	90.5969	88.622	86.0279	90.8544	91.764	85.707	86.4614
ENSG00000173992.9_4	protein_coding	CCS	0.524807	0.000129878	0.000845024	0	0.00548377	0.961638	0.983433	0	23.3188	14.1938	15.93	24.7306	17.605	15.3693	21.7734	17.0336	17.3407	10.8865	6.6264	7.43696	11.5456	8.21894	7.17519	10.165	7.95219	8.09554
ENSG00000260401.1_6	lncRNA	AP002761.4	0.559087	0.0198378	0.0521769	0	-0.72605	0.00906114	0.0497759	-1	3.70981	1.79921	3.25725	3.27647	1.30006	2.73637	4.33157	1.49587	1.63966	1.10378	0.535319	0.96913	0.97485	0.386807	0.814152	1.28877	0.445067	0.487849
ENSG00000177570.14_4	protein_coding	SAMD12	0.593617	6.4434e-06	6.76745e-05	1	-0.00486229	0.961065	0.983068	0	32.4874	26.6883	24.3276	37.253	23.1302	23.1223	38.1178	21.4247	24.0484	2.11259	1.73548	1.58197	2.42249	1.50411	1.5036	2.47872	1.3932	1.56382
ENSG00000159423.17_5	protein_coding	ALDH4A1	-0.109762	0.194674	0.313368	0	0.204256	0.019233	0.0858759	0	16.0052	19.5914	17.0496	14.5422	17.3883	15.5061	15.2471	19.8323	16.8438	4.40672	5.3941	4.69429	4.0039	4.78753	4.26929	4.198	5.46044	4.63761
ENSG00000158286.13_3	protein_coding	RNF207	0.43087	0.00473702	0.0165717	0	-0.0068058	0.960726	0.982861	0	61.9539	34.3349	41.7335	61.4451	41.2227	35.892	44.9906	48.9776	47.6992	9.39407	5.2062	6.32805	9.31692	6.2506	5.44231	6.82192	7.42648	7.23263
ENSG00000127481.15_4	protein_coding	UBR4	0.214274	0.184855	0.301224	0	0.0219373	0.889469	0.946942	0	296.573	303.766	295.442	348.877	236.448	179.004	298.994	286.435	340.304	12.026	12.3177	11.9801	14.1469	9.58795	7.25858	12.1242	11.6149	13.7993
ENSG00000127463.15_7	protein_coding	EMC1	0.0592497	0.234853	0.360972	0	-0.0642639	0.199604	0.405932	0	196.408	189.067	194.722	196.184	179.083	184.34	197.924	173.907	187.716	20.4549	19.6904	20.2793	20.4316	18.6506	19.1981	20.6128	18.1115	19.5497
ENSG00000053372.5_4	protein_coding	MRTO4	-0.0643503	0.248496	0.376005	0	-0.00453919	0.933801	0.968614	0	140.178	150.084	148.612	135.053	144.632	153.465	147.678	145.92	139.918	54.8427	58.7183	58.1424	52.8378	56.5852	60.0409	57.7769	57.089	54.7409
ENSG00000270728.1_6	processed_pseudogene	AL035413.1	0.040225	0.863256	0.907001	0	-0.103927	0.661289	0.818132	0	2.49087	2.44892	2.23936	2.46858	2.1126	1.82424	2.13691	1.8819	2.88183	4.74452	4.66461	4.26544	4.70205	4.02399	3.47475	4.0703	3.58457	5.4892
ENSG00000053371.12_6	protein_coding	AKR7A2	-0.145749	0.0843751	0.164202	0	0.195938	0.0227231	0.0969307	0	51.9904	69.8193	56.0348	49.1471	60.7236	59.4704	50.304	61.2824	51.9226	29.1917	39.2023	31.4626	27.5952	34.0952	33.3916	28.2448	34.409	29.1536
ENSG00000040487.13_4	protein_coding	PQLC2	0.101278	0.39239	0.523151	0	0.326122	0.00992037	0.0533187	0	13.3023	13.644	13.2326	10.5475	14.7882	10.9911	12.3017	13.7041	9.39078	4.95247	5.07967	4.92649	3.92686	5.50565	4.09198	4.57992	5.10204	3.4962
ENSG00000077549.18_5	protein_coding	CAPZB	-0.0355076	0.558607	0.673793	0	0.0324114	0.592308	0.770731	0	104.723	115.199	110.39	104.129	110.343	111.644	107.538	106.062	102.156	32.3318	35.5663	34.0815	32.1485	34.0669	34.4686	33.2011	32.7453	31.5393
ENSG00000173436.15_5	protein_coding	MICOS10	0.0465083	0.658474	0.755001	0	-0.0931155	0.384145	0.606985	0	13.7263	12.0947	12.062	14.1382	14.2465	13.9555	14.4386	12.1117	14.906	2.5048	2.20706	2.20109	2.57996	2.59972	2.54662	2.63478	2.21017	2.72007
ENSG00000158747.14_4	protein_coding	NBL1	-0.14274	0.0383846	0.0885997	0	-0.104639	0.118152	0.292964	0	69.7445	71.4686	72.2702	60.0537	65.003	71.8296	65.6089	63.9846	71.4494	19.395	19.8745	20.0974	16.7001	18.0765	19.9749	18.245	17.7933	19.8691
ENSG00000158748.4_3	protein_coding	HTR6	0.42714	0.126635	0.226033	0	-0.461051	0.136027	0.320229	0	1.9079	1.14949	1.06878	2.01974	0.65003	1.32258	1.67487	1.20635	1.78872	0.50208	0.302499	0.281259	0.531511	0.17106	0.348047	0.440756	0.317459	0.470716
ENSG00000162542.13_3	protein_coding	TMCO4	0.136686	0.0829133	0.16215	0	0.137952	0.0798529	0.227313	0	18.8671	19.7413	16.4389	19.6588	20.1509	17.9688	19.8097	18.5295	18.6325	4.65393	4.86959	4.05499	4.84924	4.97063	4.43236	4.88646	4.57066	4.59608
ENSG00000169914.6_3	protein_coding	OTUD3	0.189953	0.0372953	0.0865982	0	-0.0857668	0.328556	0.553015	0	54.6932	39.5826	48.9096	58.5726	49.6189	44.6028	53.827	48.9776	53.1648	7.94383	5.74911	7.10379	8.50727	7.20682	6.47825	7.81801	7.11367	7.72182
ENSG00000254973.2_7	lncRNA	AC105219.4	0.740702	0.0166669	0.0453983	1	-0.0154644	0.960378	0.982718	0	1.64292	0.799648	1.22147	1.21185	1.24589	0.866516	1.84814	0.723807	0.695614	0.884716	0.430613	0.657764	0.652583	0.670916	0.466621	0.995227	0.389772	0.37459
ENSG00000164932.13_3	protein_coding	CTHRC1	0.494497	0.00646237	0.0211855	0	-0.0084943	0.960274	0.982718	0	5.51172	4.548	3.6644	7.45061	5.14607	4.74303	6.46848	4.10158	5.41585	3.15858	2.6063	2.09994	4.26969	2.94904	2.71807	3.70687	2.35047	3.10364
ENSG00000134909.18_3	protein_coding	ARHGAP32	-0.296446	0.00415096	0.0149085	0	0.00475139	0.958138	0.981326	0	43.5108	52.277	54.966	41.3823	46.5313	44.4203	38.9841	53.803	52.966	3.38843	4.0711	4.28051	3.22267	3.62365	3.45926	3.03591	4.18994	4.12476
ENSG00000158828.8_4	protein_coding	PINK1	-0.00953014	0.936546	0.957377	0	-0.0123646	0.917577	0.960437	0	13.9913	15.0934	13.5888	12.7917	12.1339	15.5061	13.8033	13.1733	11.6267	2.89495	3.12298	2.81167	2.64674	2.51063	3.20837	2.85605	2.7257	2.40569
ENSG00000117242.7_7	lncRNA	PINK1-AS	-0.0906219	0.399234	0.529682	0	-0.0992579	0.356202	0.579758	0	12.0304	12.6444	11.3495	12.298	12.2964	13.4082	12.2439	11.4362	14.1607	2.70772	2.84592	2.55446	2.76795	2.76759	3.01782	2.75577	2.57397	3.18719
ENSG00000244038.9_5	protein_coding	DDOST	-0.11769	0.0561028	0.119413	0	-0.0476447	0.419401	0.637118	0	428.006	474.741	460.086	402.961	427.557	478.636	438.702	430.376	438.684	157.297	174.473	169.087	148.093	157.132	175.904	161.228	158.168	161.222
ENSG00000117245.12_3	protein_coding	KIF17	0.372214	0.221596	0.34581	0	0.44799	0.140884	0.327338	0	1.00695	1.14949	0.916101	1.57091	0.975045	0.82091	0.750806	1.44761	0.89436	0.225268	0.257158	0.204944	0.351434	0.218131	0.183649	0.167965	0.323851	0.200081
ENSG00000247679.3_6	lncRNA	AC139795.2	0.546119	0.00665942	0.0216739	0	0.0100843	0.957761	0.981149	0	4.08079	3.34853	3.7153	4.5332	3.19598	2.50834	4.33157	2.41269	2.68308	1.42685	1.17081	1.29905	1.58504	1.11748	0.87704	1.51454	0.843598	0.93814
ENSG00000115568.15_5	protein_coding	ZNF142	-0.302933	0.000868635	0.00412074	0	-0.00409699	0.957238	0.980823	0	56.0712	65.971	69.4201	51.3464	64.4613	58.6951	50.304	63.5985	66.5802	8.01704	9.43251	9.92566	7.34149	9.21666	8.3922	7.19245	9.0933	9.51961
ENSG00000075151.20_3	protein_coding	EIF4G3	0.144229	0.0311563	0.074936	0	-0.0377709	0.550274	0.74215	0	81.5099	69.4694	73.3898	81.822	76.9202	73.1978	86.9779	74.2144	79.8465	8.49415	7.23942	7.64796	8.52668	8.01586	7.62795	9.06398	7.73389	8.32081
ENSG00000123384.13_3	protein_coding	LRP1	0.587953	0.000401453	0.00218124	1	-0.00773356	0.957224	0.980823	0	16.4822	10.3954	12.5709	17.7737	9.37126	8.43713	14.092	12.2565	11.3783	0.790929	0.498845	0.603241	0.852908	0.449698	0.404872	0.676234	0.588151	0.546008
ENSG00000187952.9_4	processed_pseudogene	HS6ST1P1	0.619846	0.0270413	0.0667863	0	0.665834	0.0178005	0.081549	0	2.91485	2.59886	1.57773	1.3465	2.38344	1.41379	2.42568	1.83365	1.29185	2.36212	2.10604	1.27855	1.09116	1.93148	1.1457	1.9657	1.48594	1.04688
ENSG00000142794.18_3	protein_coding	NBPF3	0.070738	0.40764	0.538211	0	0.100654	0.241566	0.457294	0	17.1711	19.7913	16.9988	19.3447	18.3633	18.1512	18.4236	17.9987	17.1916	2.52072	2.90536	2.49541	2.83979	2.69573	2.6646	2.70458	2.6422	2.52372
ENSG00000076864.19_5	protein_coding	RAP1GAP	-0.194014	0.0192533	0.0509713	0	-0.156409	0.052093	0.170961	0	20.139	21.3406	23.7677	21.5888	20.0426	24.8097	21.1381	23.1136	23.3527	3.49939	3.70819	4.12993	3.75131	3.48264	4.31099	3.67299	4.01626	4.05782
ENSG00000147164.12_4	protein_coding	SNX12	-0.306607	0.00053658	0.00277541	0	-0.00395273	0.95688	0.980664	0	34.3423	46.5795	46.4158	36.9837	41.3852	47.6584	39.6194	48.6881	43.0287	13.234	17.9497	17.8866	14.2519	15.9481	18.3655	15.2676	18.7623	16.5814
ENSG00000161551.14_2	protein_coding	ZNF577	0.470539	0.0183411	0.0489966	0	0.0107085	0.955554	0.979862	0	3.81581	2.39894	2.39204	4.03949	3.03347	2.82758	4.50483	3.52253	3.67681	0.508097	0.319433	0.318514	0.537881	0.403924	0.376508	0.599845	0.469045	0.489589
ENSG00000198648.11_4	protein_coding	STK39	-0.4019	4.84705e-07	7.30144e-06	0	0.00299522	0.955302	0.979782	0	110.605	146.586	141.232	115.709	155.411	159.348	115.74	150.938	151.296	29.8853	39.607	38.1605	31.2642	41.9917	43.0553	31.2725	40.783	40.8797
ENSG00000070831.17_7	protein_coding	CDC42	-0.0281255	0.598256	0.7065	0	-0.00454055	0.931916	0.967913	0	213.049	226.45	222.103	224.865	225.019	239.432	224.144	221.533	213.504	13.0882	13.9114	13.6444	13.814	13.8235	14.7089	13.7698	13.6094	13.1161
ENSG00000159958.6_3	protein_coding	TNFRSF13C	0.71598	0.00181017	0.00754989	1	0.0123909	0.953412	0.978709	0	7.36663	3.69837	4.17335	9.15617	5.14607	4.01334	6.52623	5.40443	5.9624	1.86781	0.937721	1.05815	2.32154	1.30478	1.01758	1.65472	1.37029	1.51177
ENSG00000162552.15_3	protein_coding	WNT4	0.576928	0.116165	0.210865	0	-0.542176	0.196463	0.401809	0	1.00695	0.49978	0.610734	1.61579	0.758368	1.04894	1.09733	0.482538	0.844674	0.216548	0.10748	0.131341	0.347483	0.16309	0.225579	0.235985	0.103772	0.18165
ENSG00000184677.18_5	protein_coding	ZBTB40	0.0546495	0.398838	0.529303	0	-0.0757137	0.248092	0.465169	0	76.1042	72.4181	78.4284	82.5851	70.0949	67.7251	75.6004	71.6569	79.6974	8.30016	7.89815	8.55365	9.00699	7.64477	7.38631	8.24521	7.81513	8.69205
ENSG00000167359.8_4	protein_coding	OR51I1	1.07304	0.00551227	0.0186731	1	0.0232772	0.952804	0.978396	0	1.53692	0.49978	1.06878	1.25673	0.975045	0.364849	1.79038	0.723807	0.7453	1.62637	0.528868	1.13099	1.32987	1.03179	0.386083	1.89458	0.765934	0.788678
ENSG00000135144.7_2	protein_coding	DTX1	0.899615	0.00407277	0.0146642	1	-0.0183304	0.952836	0.978396	0	1.9609	0.949582	0.661628	1.75044	0.920876	1.04894	1.15509	0.723807	0.89436	0.44698	0.216454	0.150816	0.399007	0.20991	0.239102	0.263297	0.164989	0.203866
ENSG00000169641.13_4	protein_coding	LUZP1	-0.0914605	0.2297	0.355093	0	-0.123505	0.110414	0.280921	0	83.5768	83.6132	94.9691	96.1847	92.7376	94.1766	92.8689	90.4277	101.46	8.65363	8.65741	9.8332	9.95907	9.60215	9.75115	9.61575	9.36298	10.5053
ENSG00000136715.18_5	protein_coding	SAP130	-0.199512	0.00715606	0.0229589	0	-0.00405595	0.95116	0.977579	0	47.2206	55.1258	53.999	43.3572	48.5356	49.6194	45.3371	51.8246	52.4195	10.7982	12.6059	12.3483	9.91474	11.0989	11.3468	10.3675	11.851	11.9871
ENSG00000143882.12_6	protein_coding	ATP6V1C2	-0.792624	0.00212717	0.00859382	-1	-0.0127955	0.950504	0.977097	0	1.48393	2.09908	2.13757	1.66068	2.87097	2.55394	1.21284	2.60571	2.93151	0.423737	0.599394	0.610385	0.474208	0.819807	0.729281	0.346328	0.744062	0.837097
ENSG00000125944.20_5	protein_coding	HNRNPR	0.0223338	0.661533	0.757124	0	-0.0548618	0.288632	0.511513	0	365.576	356.393	367.662	360.547	364.342	376.843	395.963	342.795	360.179	42.1364	41.0781	42.3769	41.5568	41.9942	43.4351	45.6389	39.5107	41.5144
ENSG00000125945.15_3	protein_coding	ZNF436	-0.0538878	0.485753	0.609716	0	0.0760422	0.324012	0.548482	0	22.5239	25.2889	22.4954	22.9802	24.9178	23.0767	22.2932	24.0304	24.8433	4.7062	5.28393	4.70024	4.80154	5.2064	4.82171	4.65799	5.02098	5.19084
ENSG00000249087.7_6	lncRNA	ZNF436-AS1	0.492808	0.0685469	0.139757	0	0.282076	0.291968	0.51477	0	1.9079	1.5993	1.32326	2.15439	1.67924	1.41379	2.0214	1.97841	1.58997	0.713502	0.598091	0.49486	0.805682	0.627989	0.528717	0.755946	0.739868	0.594605
ENSG00000101546.13_4	protein_coding	RBFA	-0.200746	0.0123966	0.0358076	0	0.00452969	0.9502	0.97687	0	29.2545	35.8842	36.4404	34.6049	37.16	35.7552	32.2269	37.8793	38.4078	3.68213	4.51658	4.58659	4.35556	4.67716	4.50034	4.05625	4.76768	4.83421
ENSG00000185504.17_6	protein_coding	FAAP100	0.184487	0.00927984	0.0284507	0	0.00417636	0.948448	0.976109	0	95.2362	81.9639	82.1437	93.2224	79.6287	80.9964	90.9052	84.9267	82.7283	17.7912	15.3118	15.3454	17.415	14.8755	15.131	16.9821	15.8653	15.4546
ENSG00000170873.18_4	protein_coding	MTSS1	-0.422599	0.00704122	0.0226711	0	-0.00870429	0.948772	0.976109	0	5.19374	5.54756	6.20913	4.03949	6.22945	5.60955	4.50483	6.46601	6.55864	0.672155	0.717945	0.803562	0.522776	0.806193	0.725967	0.582999	0.836808	0.848795
ENSG00000117318.9_3	protein_coding	ID3	0.132389	0.0493947	0.108051	0	-0.113371	0.0900201	0.245341	0	74.0373	64.1718	67.4352	74.3714	61.3195	73.3802	76.9865	64.5154	64.6921	49.4902	42.8956	45.077	49.7135	40.989	49.051	51.4615	43.1252	43.2434
ENSG00000142676.14_5	protein_coding	RPL11	0.143605	0.0308486	0.07432	0	0.117607	0.0711474	0.211061	0	746.944	716.635	685.192	731.551	778.682	720.576	784.014	726.751	642.25	280.912	269.513	257.688	275.123	292.848	270.995	294.853	273.317	241.538
ENSG00000236810.6_6	lncRNA	ELOA-AS1	-0.571651	0.0496297	0.108419	0	-0.46084	0.101262	0.264488	0	0.847957	0.74967	1.06878	0.673248	0.704199	0.912122	0.635297	0.868569	1.24217	0.274776	0.242926	0.346333	0.218162	0.228192	0.295568	0.205864	0.281455	0.402517
ENSG00000110455.13_5	protein_coding	ACCS	0.423009	0.00683398	0.0221471	0	0.0093241	0.948918	0.976109	0	8.74456	6.44716	5.95465	10.7271	7.47534	6.61289	8.43213	7.14157	8.34736	1.50095	1.10662	1.02208	1.84124	1.2831	1.13506	1.44733	1.22581	1.43278
ENSG00000057757.10_5	protein_coding	PITHD1	-0.0842056	0.201656	0.32202	0	-0.163847	0.0189908	0.0852429	0	67.4126	62.9223	68.1477	63.5995	61.9153	74.7028	66.4174	61.9097	66.282	31.0228	28.9564	31.3611	29.268	28.493	34.3777	30.5649	28.4904	30.5025
ENSG00000011009.11_3	protein_coding	LYPLA2	-0.104118	0.136322	0.238687	0	-0.183409	0.0132868	0.0663006	0	76.8991	71.9184	79.9552	69.3445	66.6281	82.5014	75.5426	71.1744	75.7225	38.05	35.5855	39.5622	34.312	32.9679	40.8221	37.3788	35.2174	37.4678
ENSG00000117308.15_5	protein_coding	GALE	0.153167	0.0321157	0.0766939	0	0.123051	0.0785229	0.224923	0	92.7453	84.9126	78.0721	82.6299	86.5623	79.7651	86.5737	84.975	77.6106	23.4501	21.4697	19.7401	20.8925	21.8868	20.1682	21.8897	21.4855	19.6234
ENSG00000035681.9_5	protein_coding	NSMAF	-0.182889	0.00532582	0.0181959	0	-0.00374379	0.948729	0.976109	0	54.0043	60.8232	62.5493	51.9298	65.0572	61.3402	58.1586	59.7865	62.2077	8.75272	9.8579	10.1377	8.41651	10.5441	9.94169	9.42602	9.68987	10.0823
ENSG00000117407.17_6	protein_coding	ARTN	0.386659	0.00214859	0.00866098	0	0.00728624	0.948621	0.976109	0	19.821	13.8439	13.0799	17.3249	11.5922	13.6818	14.3231	14.1384	12.6701	7.45992	5.21035	4.9228	6.52048	4.36289	5.14935	5.39069	5.32118	4.76858
ENSG00000095380.11_3	protein_coding	NANS	0.191278	0.0117216	0.034325	0	0.199048	0.00905691	0.0497716	0	37.3631	37.7334	34.0484	37.9712	38.0809	34.7519	40.9478	40.9675	32.9423	7.57719	7.65228	6.90497	7.7005	7.72276	7.04763	8.30415	8.30815	6.68065
ENSG00000188529.14_3	protein_coding	SRSF10	-0.0281539	0.590645	0.699287	0	-0.0882671	0.103059	0.267787	0	212.148	199.312	219.559	214.856	204.434	209.56	204.104	201.701	214.547	20.643	19.394	21.3641	20.9065	19.8924	20.3912	19.8602	19.6264	20.8764
ENSG00000137040.9_3	protein_coding	RANBP6	0.0478957	0.567598	0.681278	0	-0.243706	0.00900334	0.0494961	0	38.1051	28.6874	34.8627	39.9012	28.9805	35.0255	34.2483	34.1155	38.9047	8.31444	6.25952	7.60696	8.70634	6.32348	7.64248	7.4729	7.44391	8.48891
ENSG00000224715.1_6	lncRNA	Z82186.1	2.291	3.2959e-06	3.75994e-05	1	-0.0314118	0.948897	0.976109	0	1.21894	0.24989	0.254472	1.48115	0.379184	0.182424	1.15509	0.144761	0.347807	0.279317	0.0572617	0.0583117	0.339401	0.0868891	0.0418021	0.264685	0.0331717	0.0796991
ENSG00000185436.12_3	protein_coding	IFNLR1	-0.195218	0.0311164	0.0748775	0	0.110307	0.193295	0.397867	0	15.8992	19.5414	18.1693	14.3626	20.0968	17.5127	17.4995	19.205	18.8313	3.21846	3.95575	3.678	2.90741	4.06817	3.54509	3.54242	3.88766	3.81199
ENSG00000119922.10_4	protein_coding	IFIT2	0.989851	6.30463e-05	0.00046562	1	-0.0139164	0.948203	0.976035	0	3.44483	1.94914	1.67952	3.45601	1.67924	2.09788	4.96687	2.21968	2.13653	0.845564	0.478435	0.412253	0.848308	0.412186	0.514944	1.21916	0.544839	0.52443
ENSG00000167757.14_5	protein_coding	KLK11	8.67062	5.4048e-20	1.49453e-16	1	0.0557024	0.947683	0.975859	0	37.0981	0.049978	0.101789	35.5026	0.108338	0.0912122	34.1905	0.0965077	0.0496867	11.9172	0.0160546	0.032698	11.4046	0.0348019	0.0293004	10.9831	0.0310015	0.015961
ENSG00000189241.7_4	protein_coding	TSPYL1	0.163715	0.00795798	0.0250582	0	0.00375659	0.946425	0.97498	0	112.513	102.855	100.567	108.348	95.121	104.392	112.159	99.9819	92.2185	15.3246	14.0091	13.6976	14.7573	12.9557	14.2185	15.2763	13.6178	12.5604
ENSG00000184454.7_4	protein_coding	NCMAP	-0.686419	0.073349	0.147362	0	0.0730055	0.826151	0.914479	0	0.953952	2.0491	1.42505	0.538598	0.758368	1.68743	1.15509	1.54412	1.04342	0.23009	0.494235	0.343716	0.129908	0.182916	0.407001	0.278602	0.372437	0.251669
ENSG00000164181.14_4	protein_coding	ELOVL7	-0.220287	0.00408252	0.014692	0	-0.00459516	0.945502	0.974688	0	31.1624	36.1841	35.1681	30.7899	36.6184	37.8531	31.7649	35.9974	36.0725	6.98553	8.1112	7.88345	6.90201	8.20855	8.48533	7.12057	8.06935	8.0862
ENSG00000166813.15_3	protein_coding	KIF7	0.465797	0.0131654	0.0375921	0	0.0127243	0.943321	0.973753	0	5.45873	3.14861	4.02066	4.98203	3.35849	2.82758	3.92729	4.00507	3.62713	1.08805	0.627589	0.801408	0.99303	0.669422	0.563599	0.782797	0.798299	0.722967
ENSG00000020633.18_2	protein_coding	RUNX3	0.122253	0.0700121	0.142022	0	0.0113038	0.861225	0.933408	0	50.5595	48.5786	46.6193	49.955	47.1272	47.3847	50.1307	43.8145	44.3702	11.1783	10.7404	10.3072	11.0447	10.4194	10.4764	11.0835	9.68704	9.80991
ENSG00000101843.19_3	protein_coding	PSMD10	-0.225692	0.00057205	0.0029326	0	-0.00401026	0.941362	0.972635	0	50.4535	59.9736	60.6153	49.8652	60.1278	59.4704	53.5382	59.2074	59.7234	21.1102	25.0936	25.3621	20.8641	25.1581	24.883	22.4009	24.773	24.9889
ENSG00000196659.9_2	protein_coding	TTC30B	0.965759	0.00612666	0.0202924	1	0.0269668	0.939628	0.971261	0	1.27194	0.699692	0.305367	1.43626	0.541692	0.912122	1.27059	0.820315	0.794987	0.316638	0.174183	0.0760186	0.357546	0.13485	0.227065	0.316304	0.204211	0.197906
ENSG00000183726.11_3	protein_coding	TMEM50A	0.0031792	0.956387	0.970851	0	-0.0201238	0.729585	0.862718	0	70.0625	69.4694	69.6745	69.8831	69.824	76.1622	72.0773	69.2925	65.5864	23.2766	23.0795	23.1477	23.217	23.1974	25.3031	23.946	23.0208	21.7895
ENSG00000147454.14_3	protein_coding	SLC25A37	0.110749	0.0830753	0.162293	0	-0.177519	0.0089769	0.0493695	0	138.058	101.705	118.228	130.565	103.896	114.973	118.858	111.756	125.807	17.2659	12.7195	14.7859	16.3288	12.9936	14.3788	14.8647	13.9765	15.7337
ENSG00000105700.11_4	protein_coding	KXD1	-0.247549	0.000691653	0.00343352	0	0.00467509	0.939029	0.970977	0	75.3622	89.3607	89.9814	72.0375	89.65	88.7039	73.81	84.4442	83.8711	18.3274	21.7317	21.8826	17.5188	21.802	21.572	17.9499	20.536	20.3967
ENSG00000117643.14_3	protein_coding	MAN1C1	-0.0289348	0.904863	0.936479	0	0.0277504	0.910743	0.956954	0	1.43093	1.44936	1.42505	1.39138	1.35423	1.64182	1.15509	1.35111	0.993734	0.158534	0.160576	0.157882	0.154152	0.150036	0.181899	0.127973	0.149691	0.110097
ENSG00000169955.7_3	protein_coding	ZNF747	0.633594	0.000152914	0.000970406	1	0.0109368	0.938903	0.970977	0	5.8827	3.94826	3.81709	5.65528	4.06269	3.69409	6.64174	3.7638	4.17368	1.49459	1.00312	0.969788	1.43681	1.03219	0.93854	1.68743	0.95625	1.06039
ENSG00000117640.18_4	protein_coding	MTFR1L	-0.0929546	0.166805	0.278995	0	-0.154017	0.0282817	0.112837	0	32.5404	31.1363	31.5546	30.745	30.0639	35.9832	31.8804	29.9656	33.8366	5.61331	5.37111	5.44326	5.3036	5.18611	6.20721	5.49946	5.16916	5.83692
ENSG00000127423.10_3	protein_coding	AUNIP	-0.0767276	0.354442	0.487417	0	-0.0981933	0.239259	0.455626	0	21.3579	22.9899	21.8846	21.1849	22.751	25.0834	24.0835	19.8323	23.1043	8.86957	9.5473	9.0883	8.7977	9.44811	10.4167	10.0015	8.23601	9.59481
ENSG00000198208.11_3	protein_coding	RPS6KL1	0.364409	0.000695907	0.00345037	0	0.00723166	0.938123	0.970539	0	14.2563	10.3454	10.2807	14.6319	11.538	11.2191	13.8033	11.4844	11.6764	1.87164	1.35821	1.3497	1.92096	1.51477	1.4729	1.81217	1.50773	1.53294
ENSG00000117632.23_4	protein_coding	STMN1	0.0101078	0.856139	0.902743	0	-0.0102398	0.854276	0.930397	0	444.86	446.104	457.592	460.726	476.58	484.656	489.237	452.573	442.708	71.2117	71.4109	73.2499	73.7515	76.2895	77.5822	78.3154	72.4464	70.8674
ENSG00000182986.13_4	protein_coding	ZNF320	-0.784623	0.00219251	0.00880604	-1	0.0159987	0.93778	0.970268	0	1.80191	2.89872	3.51172	1.66068	2.9793	2.59955	1.55937	2.89523	2.58371	0.216836	0.348824	0.42259	0.199841	0.35852	0.312822	0.187649	0.348403	0.310915
ENSG00000175087.10_5	protein_coding	PDIK1L	0.108005	0.307009	0.438918	0	0.0851447	0.418132	0.635968	0	19.503	18.5418	18.0166	23.07	23.7803	20.7964	22.9284	22.245	21.9615	4.27698	4.06619	3.95102	5.0592	5.21497	4.56061	5.02817	4.87829	4.81612
ENSG00000142675.18_3	protein_coding	CNKSR1	-0.0207733	0.810474	0.869393	0	-0.0243472	0.778437	0.890533	0	28.6186	29.9868	27.8902	29.3087	27.3554	28.2302	28.5884	28.9523	31.7001	7.22691	7.57243	7.04297	7.40119	6.90794	7.12883	7.21929	7.31119	8.00508
ENSG00000076554.15_5	protein_coding	TPD52	-0.173727	0.00640847	0.0210518	0	-0.00448769	0.937198	0.970139	0	80.291	94.3085	91.3047	84.9639	100.43	97.8707	88.8838	91.055	97.3859	9.79516	11.5052	11.1388	10.3652	12.252	11.9398	10.8435	11.1083	11.8807
ENSG00000142669.15_4	protein_coding	SH3BGRL3	0.107577	0.195814	0.314921	0	0.104617	0.207502	0.417696	0	85.2197	80.9644	79.1409	78.9046	83.6913	78.3969	82.7041	81.5972	71.4494	97.2828	92.4251	90.3435	90.0738	95.5381	89.4942	94.4111	93.1475	81.5633
ENSG00000158062.20_4	protein_coding	UBXN11	0.175904	0.12187	0.219318	0	-0.0196744	0.85966	0.932623	0	22.9478	15.843	18.7292	22.3967	19.7717	18.9721	18.6546	20.4114	19.0797	4.87837	3.36799	3.98154	4.76121	4.20318	4.03319	3.9657	4.33915	4.05606
ENSG00000102007.11_3	protein_coding	PLP2	0.192107	0.00672999	0.0218606	0	-0.00504989	0.937098	0.970105	0	126.823	110.152	107.947	117.1	103.788	112.237	123.248	106.207	101.063	97.3312	84.5369	82.8451	89.8697	79.6532	86.1371	94.5876	81.5093	77.5616
ENSG00000117682.17_4	protein_coding	DHDDS	-0.0504078	0.388241	0.519202	0	-0.0967601	0.106979	0.274403	0	43.1398	42.7812	46.3649	45.6462	42.6311	44.694	45.0483	44.2005	47.5998	7.69255	7.6286	8.26763	8.13948	7.60184	7.96968	8.03287	7.88169	8.48785
ENSG00000198830.11_3	protein_coding	HMGN2	0.0564108	0.257824	0.386397	0	-0.0262033	0.594126	0.771583	0	375.062	358.292	363.488	362.656	358.546	373.651	391.112	349.068	348.254	117.611	112.353	113.982	113.721	112.432	117.169	122.644	109.46	109.205
ENSG00000134824.14_5	protein_coding	FADS2	0.594511	4.09729e-07	6.36469e-06	1	0.230896	0.0089713	0.0493575	0	40.225	33.7851	27.4321	37.2979	32.0681	27.4093	43.0269	27.746	24.8433	3.81171	3.20147	2.59946	3.53434	3.03877	2.5973	4.07722	2.6292	2.35415
ENSG00000117713.20_6	protein_coding	ARID1A	-0.169818	0.0399225	0.0914044	0	-0.0402838	0.605162	0.777916	0	144.206	173.474	177.673	149.596	146.907	141.06	143.75	158.273	173.754	9.04735	10.8836	11.147	9.38551	9.21681	8.84997	9.01878	9.92989	10.9012
ENSG00000197892.13_3	protein_coding	KIF13B	0.434442	2.43742e-05	0.000209996	0	0.22932	0.0089678	0.0493571	0	24.8028	23.7895	20.5105	27.9622	25.0262	18.9265	29.1659	22.2933	21.2162	2.23187	2.14069	1.84563	2.51617	2.25197	1.7031	2.62449	2.00605	1.90913
ENSG00000204160.12_5	protein_coding	ZDHHC18	-0.0687179	0.363362	0.495971	0	0.0732015	0.330241	0.55499	0	42.0269	48.8285	46.2631	44.1651	49.6731	45.7429	45.8569	47.1922	46.457	7.69723	8.94295	8.47309	8.08884	9.09764	8.37782	8.3987	8.64327	8.50862
ENSG00000255026.1_6	lncRNA	AC136475.3	3.77443	5.37275e-13	5.78613e-11	1	0.0259331	0.936991	0.970105	0	10.7055	0.849626	0.559839	10.8617	0.704199	0.592879	7.85458	0.6273	0.993734	12.4482	0.987938	0.650976	12.6299	0.818836	0.689395	9.13324	0.729418	1.1555
ENSG00000142751.15_3	protein_coding	GPN2	0.161712	0.022675	0.0579977	0	0.134198	0.0534164	0.174046	0	45.5777	42.0315	41.0718	43.3123	45.8813	39.4949	43.2002	41.7396	37.5134	9.17795	8.46386	8.27061	8.72176	9.23908	7.95306	8.69919	8.40507	7.55406
ENSG00000198746.13_4	protein_coding	GPATCH3	0.0821899	0.363221	0.495945	0	-0.0179953	0.841234	0.922902	0	18.973	17.3424	18.1693	19.1651	19.2842	19.2458	21.3113	18.7707	18.6325	8.52338	7.79082	8.16232	8.60967	8.66317	8.6459	9.57382	8.4325	8.3704
ENSG00000065361.15_4	protein_coding	ERBB3	0.25527	0.000535213	0.00276933	0	-0.00497809	0.936398	0.969895	0	54.9052	46.5795	47.6881	57.1812	47.7772	44.2835	55.2708	45.4551	48.3451	6.07426	5.15317	5.27582	6.32605	5.28567	4.89916	6.11471	5.02878	5.34851
ENSG00000185305.11_4	protein_coding	ARL15	-0.445034	0.000347733	0.0019331	0	0.0079549	0.936012	0.969732	0	7.8966	10.9452	11.095	9.20105	12.1881	11.7664	8.0856	11.4844	11.5273	2.07805	2.88031	2.91974	2.42133	3.20738	3.09641	2.12779	3.02221	3.0335
ENSG00000006757.12_4	protein_coding	PNPLA4	-0.301	0.00731939	0.0233893	0	-0.00796474	0.935611	0.969539	0	11.3414	14.4436	13.3344	10.3231	12.6214	14.7308	11.0888	12.9803	12.1732	3.32496	4.23443	3.90922	3.02642	3.70021	4.31861	3.2509	3.80542	3.56882
ENSG00000158246.8_4	protein_coding	TENT5B	-0.16208	0.152537	0.260689	0	0.227229	0.0442705	0.153096	0	11.8714	17.7922	12.8254	10.6822	13.9215	13.0433	12.0706	13.5111	12.7695	4.9838	7.46943	5.3843	4.48455	5.84445	5.4758	5.06744	5.67215	5.36082
ENSG00000115107.20_4	protein_coding	STEAP3	0.0432575	0.464439	0.591294	0	0.168412	0.00895548	0.0493081	0	63.1198	67.4703	60.8698	65.1255	70.8533	60.5649	59.7757	66.9281	61.1643	13.836	14.7896	13.3428	14.2756	15.5312	13.276	13.103	14.6708	13.4073
ENSG00000135245.10_4	protein_coding	HILPDA	0.267885	0.0172537	0.0466532	0	-0.00868726	0.934497	0.968877	0	14.7863	11.445	12.1129	16.4272	14.7882	14.7308	15.9979	12.8355	12.3223	7.14312	5.52897	5.85164	7.93587	7.14405	7.11631	7.72847	6.20073	5.9528
ENSG00000186501.14_4	protein_coding	TMEM222	0.174314	0.0618504	0.128741	0	0.0124367	0.889526	0.946942	0	37.2041	30.1367	32.9287	37.0286	33.8557	31.6962	32.2846	31.4132	29.9114	8.31191	6.73296	7.35673	8.2727	7.56383	7.08138	7.21283	7.01815	6.68261
ENSG00000142765.18_5	protein_coding	SYTL1	-0.0218209	0.869315	0.911309	0	0.0211116	0.873168	0.939579	0	44.6768	32.6856	40.6138	42.5941	43.4978	36.9866	31.9381	46.951	43.8237	8.00085	5.85344	7.27324	7.62789	7.78973	6.62367	5.71958	8.40813	7.84808
ENSG00000142733.17_6	protein_coding	MAP3K6	-0.0815549	0.362119	0.494768	0	0.134368	0.135903	0.320093	0	31.2684	33.7352	28.6027	29.8473	32.339	28.9143	26.6247	35.9008	35.4763	5.44177	5.87107	4.97784	5.19445	5.62809	5.03207	4.63361	6.24797	6.17408
ENSG00000174950.11_3	protein_coding	CD164L2	0.163274	0.466606	0.593262	0	-0.0065337	0.976913	0.990489	0	2.86186	2.64883	2.54472	3.81507	3.30432	3.23803	4.10055	3.61904	3.82587	1.43667	1.32974	1.27747	1.9152	1.65879	1.62552	2.05851	1.81679	1.92062
ENSG00000196357.11_5	protein_coding	ZNF565	0.458901	0.0152105	0.0421229	0	0.0149203	0.934306	0.968813	0	4.45178	3.34853	3.81709	4.48832	3.35849	3.10122	4.15831	2.94348	2.63339	1.12618	0.847085	0.965617	1.13542	0.849605	0.784522	1.05194	0.74462	0.666176
ENSG00000135476.11_3	protein_coding	ESPL1	0.201099	0.00205305	0.0083317	0	0.00472464	0.933915	0.968614	0	153.957	140.188	136.194	157.001	133.039	123.091	151.663	130.575	143.296	17.318	15.7692	15.3199	17.6604	14.9651	13.846	17.0599	14.6878	16.1188
ENSG00000075239.13_2	protein_coding	ACAT1	-0.269866	0.000241221	0.0014199	0	0.00494615	0.934015	0.968614	0	87.9756	104.954	100.313	82.0913	105.467	113.787	89.3459	103.263	98.3796	15.7549	18.7955	17.9644	14.7012	18.8874	20.3774	16.0003	18.4927	17.6181
ENSG00000126709.15_3	protein_coding	IFI6	0.00112025	0.993098	0.995512	0	0.0692043	0.592276	0.770731	0	8.79756	10.6453	10.1789	10.8168	10.7255	10.307	9.87598	9.65077	9.04298	10.4484	12.6429	12.0889	12.8466	12.7381	12.2411	11.7292	11.4617	10.7399
ENSG00000009780.15_4	protein_coding	FAM76A	-0.049075	0.662551	0.757795	0	0.231385	0.0460946	0.15756	0	12.1364	14.5936	11.4513	11.894	17.6591	14.1379	13.2257	13.0285	12.8192	3.00852	3.61765	2.83869	2.94845	4.37758	3.50468	3.27856	3.22968	3.17778
ENSG00000185475.11_5	protein_coding	TMEM179B	0.386913	0.000162975	0.00102338	0	0.0070044	0.934047	0.968614	0	37.5751	27.6378	27.1268	34.964	28.3846	27.7741	39.1574	29.6761	30.4082	24.9835	18.3762	18.0364	23.2473	18.8728	18.4668	26.0355	19.7315	20.2183
ENSG00000117751.18_4	protein_coding	PPP1R8	-0.0250117	0.650594	0.749239	0	0.0266614	0.62865	0.795863	0	87.0216	91.4598	91.4574	89.7664	96.3669	95.9552	94.8903	93.7089	88.8895	30.9135	32.4901	32.4893	31.8886	34.2334	34.0871	33.7088	33.2891	31.5771
ENSG00000130775.16_3	protein_coding	THEMIS2	-0.225755	0.0822489	0.161137	0	-0.0460743	0.706842	0.847812	0	8.21459	9.39587	9.72084	6.95689	8.93791	9.80531	8.66314	8.54093	8.1983	1.77766	2.0333	2.10362	1.5055	1.93419	2.1219	1.87473	1.84829	1.77414
ENSG00000153140.8_2	protein_coding	CETN3	-0.390413	7.68842e-05	0.000547909	0	-0.0063756	0.933499	0.968614	0	24.5908	32.9855	33.285	27.7378	35.86	38.7652	28.7616	36.9624	34.1348	7.91718	10.6199	10.7164	8.9304	11.5454	12.4807	9.26002	11.9003	10.9899
ENSG00000130768.15_4	protein_coding	SMPDL3B	-0.201232	0.0247833	0.0622645	0	0.0544796	0.508261	0.710797	0	20.139	23.9894	20.8667	17.7289	21.5593	24.2624	19.4054	22.6793	20.5206	7.56252	9.00843	7.8358	6.65748	8.09588	9.11095	7.28706	8.51645	7.70582
ENSG00000158156.7_2	protein_coding	XKR8	-0.0424362	0.656985	0.754372	0	0.0269538	0.776045	0.889312	0	15.8992	18.6418	16.6425	15.2603	16.1966	17.3759	16.691	15.2965	15.1544	5.79628	6.79614	6.06726	5.56335	5.90469	6.33464	6.08494	5.57655	5.52477
ENSG00000158161.16_5	protein_coding	EYA3	0.0219946	0.698103	0.785522	0	-0.0526478	0.358406	0.581467	0	82.6228	75.7167	77.6141	75.8526	73.4534	77.804	81.8956	78.895	81.188	12.8616	11.7865	12.0819	11.8077	11.4342	12.1115	12.7484	12.2813	12.6382
ENSG00000169403.12_3	protein_coding	PTAFR	0.264113	0.17122	0.28436	0	0.502639	0.0122413	0.0626518	0	4.18679	4.19815	2.95188	3.54577	4.55021	3.10122	2.54119	3.47428	2.53402	0.994959	0.99766	0.701492	0.842626	1.08132	0.736981	0.603895	0.825636	0.602191
ENSG00000126698.11_3	protein_coding	DNAJC8	0.108847	0.0745489	0.149232	0	0.0074824	0.898126	0.951704	0	128.36	127.394	123.775	136.355	125.943	135.678	140.805	124.64	116.466	44.3844	44.0505	42.7992	47.1491	43.5489	46.915	48.6877	43.0981	40.2716
ENSG00000130770.18_4	protein_coding	ATP5IF1	-0.0521765	0.420867	0.550638	0	0.1127	0.0903375	0.24602	0	82.0929	86.412	81.5329	78.9944	87.1582	78.7617	70.98	86.7604	80.4924	36.8957	38.8368	36.644	35.5031	39.1722	35.3985	31.9011	38.9934	36.1764
ENSG00000008710.19_4	protein_coding	PKD1	0.435245	0.000472966	0.00249922	0	-0.00884131	0.932881	0.968449	0	132.546	89.3607	93.6967	116.068	75.4035	72.3769	94.8903	87.7737	88.3429	7.15229	4.82197	5.05594	6.26311	4.06883	3.90551	5.12035	4.73633	4.76705
ENSG00000130772.14_3	protein_coding	MED18	-0.050246	0.557761	0.673339	0	0.0449653	0.596748	0.77311	0	26.1277	25.9386	24.8365	22.1274	24.647	26.4515	23.044	25.478	22.4087	12.9537	12.86	12.3136	10.9705	12.2196	13.1143	11.4249	12.6316	11.1099
ENSG00000204138.13_4	protein_coding	PHACTR4	0.140746	0.0497196	0.108532	0	0.121347	0.0863998	0.238949	0	84.1598	87.4115	78.123	83.9316	80.0078	73.6539	84.4368	81.6937	77.3125	11.5019	11.9464	10.6769	11.4708	10.9345	10.0661	11.5398	11.1649	10.5661
ENSG00000180198.16_5	protein_coding	RCC1	-0.0326419	0.517843	0.639537	0	-0.11977	0.0262061	0.107059	0	303.251	285.674	308.777	282.674	270.358	305.15	296.395	274.468	288.481	77.9966	73.4759	79.4179	72.7043	69.5366	78.4852	76.2333	70.5936	74.1978
ENSG00000242125.3_5	lncRNA	SNHG3	0.0255135	0.82826	0.882959	0	-0.153173	0.204922	0.413829	0	76.9521	58.9741	71.3032	86.2206	72.8575	72.5593	67.8035	72.622	83.4736	18.8239	14.4261	17.4421	21.0911	17.8223	17.7493	16.586	17.7647	20.4192
ENSG00000200087.1	snoRNA	SNORA73B	-0.013968	0.954628	0.969475	0	0.0874175	0.718978	0.855929	0	2.0669	2.44892	2.29025	3.77019	3.25015	2.50834	1.96365	2.84698	3.22963	10.1318	12.0045	11.2267	18.4813	15.9321	12.2958	9.62571	13.9558	15.8315
ENSG00000279443.1_5	TEC	AL513497.1	-0.230965	0.251476	0.379013	0	-0.319381	0.121162	0.297615	0	1.53692	1.79921	2.03578	1.92998	1.4084	1.91546	1.73263	1.68888	2.18621	0.737841	0.863758	0.97733	0.926537	0.676139	0.919566	0.831795	0.810794	1.04955
ENSG00000180098.9_3	protein_coding	TRNAU1AP	0.0104692	0.910284	0.939919	0	-0.141499	0.142635	0.329506	0	20.616	17.1924	20.0015	16.6965	15.7091	18.8809	20.0985	18.5295	17.9369	4.78218	3.98804	4.63965	3.87301	3.64395	4.37971	4.66214	4.29818	4.16073
ENSG00000197989.14_6	lncRNA	SNHG12	0.257279	0.0606446	0.126798	0	-0.155968	0.247355	0.464124	0	62.4839	38.2332	52.7776	73.6982	52.9233	52.9487	62.4324	58.1941	60.7171	14.6469	8.9623	12.3717	17.2757	12.4058	12.4118	14.6349	13.6414	14.2328
ENSG00000120656.11_2	protein_coding	TAF12	-0.12908	0.107734	0.198609	0	0.127146	0.108043	0.276204	0	34.6603	39.6825	37.0003	31.8671	43.9854	37.1234	33.5552	35.9008	35.2279	14.8311	16.9801	15.8324	13.6359	18.8213	15.8851	14.3583	15.3619	15.074
ENSG00000162419.12_2	protein_coding	GMEB1	-0.14874	0.0370088	0.0860685	0	-0.101765	0.139321	0.325518	0	28.1946	29.9368	33.743	29.2638	29.3597	31.9699	30.6098	31.6063	31.8989	4.36516	4.6349	5.22419	4.53071	4.54555	4.94966	4.73909	4.89337	4.93867
ENSG00000198492.16_6	protein_coding	YTHDF2	-0.122183	0.0235902	0.0598077	0	-0.0422504	0.403377	0.623776	0	139.012	144.886	152.073	137.926	150.157	156.155	140.863	146.547	146.427	37.2786	38.8539	40.7811	36.9874	40.2673	41.8759	37.7749	39.2992	39.267
ENSG00000111665.11_2	protein_coding	CDCA3	0.196954	0.00599237	0.0199529	0	0.00547926	0.932485	0.968246	0	59.887	47.4791	50.4364	59.8742	51.0815	49.0266	54.1158	53.803	52.3698	10.5938	8.39892	8.92206	10.5916	9.03618	8.67266	9.57293	9.5176	9.26407
ENSG00000253304.2_3	protein_coding	TMEM200B	-0.169948	0.0986572	0.185816	0	-0.0839165	0.39702	0.618192	0	10.9704	12.4445	11.9093	10.1436	10.0213	11.9944	11.6086	12.1117	12.8192	4.20969	4.77534	4.56996	3.8924	3.84547	4.60261	4.45457	4.64763	4.9191
ENSG00000136718.9_5	protein_coding	IMP4	-0.28408	0.000183929	0.00113479	0	-0.00521026	0.93226	0.968083	0	103.292	130.293	125.608	100.359	119.768	127.788	101.128	119.669	117.658	26.7526	33.7458	32.5324	25.993	31.0199	33.0972	26.1921	30.9944	30.4735
ENSG00000116353.15_3	protein_coding	MECR	0.0334158	0.654025	0.751991	0	-0.0468737	0.531968	0.727785	0	28.8305	25.2389	26.3124	25.9425	23.7261	26.634	24.8921	26.3466	24.893	7.35098	6.43521	6.70894	6.6146	6.04949	6.79091	6.34679	6.71764	6.34702
ENSG00000069424.15_3	protein_coding	KCNAB2	0.313373	0.00166342	0.00705401	0	-0.00747943	0.932034	0.967918	0	35.8262	24.6891	28.6027	35.3231	28.5471	27.09	33.2087	30.3517	28.3711	2.06741	1.42473	1.65057	2.03838	1.64736	1.56328	1.91637	1.7515	1.6372
ENSG00000186056.10_6	lncRNA	MATN1-AS1	0.718466	0.09641	0.182317	0	0.753374	0.0809476	0.22941	0	1.37793	0.599736	0.661628	1.61579	1.24589	0.957728	0.519789	1.83365	0.546554	0.342428	0.14904	0.164421	0.401539	0.309615	0.238004	0.129172	0.455677	0.135823
ENSG00000108219.15_3	protein_coding	TSPAN14	-0.62099	2.7328e-09	8.98337e-08	-1	0.00497267	0.931829	0.967913	0	91.7914	150.584	149.884	91.2026	140.136	140.832	94.4282	137.33	135.893	5.13116	8.41767	8.37857	5.09825	7.83362	7.87253	5.27857	7.67681	7.59646
ENSG00000134644.15_4	protein_coding	PUM1	0.101111	0.151154	0.258909	0	-0.0800299	0.252276	0.46939	0	130.214	120.647	125.455	132.271	109.855	110.276	128.965	114.748	129.384	19.6669	18.2219	18.948	19.9775	16.5919	16.6554	19.4782	17.3309	19.5415
ENSG00000084628.10_3	protein_coding	NKAIN1	-0.460344	0.0241601	0.0609962	0	0.115188	0.519984	0.719383	0	1.9079	2.89872	2.29025	1.61579	2.87097	2.41712	2.0214	2.46095	2.88183	0.57467	0.87311	0.689835	0.486685	0.864749	0.728049	0.608855	0.741249	0.86802
ENSG00000139625.13_4	protein_coding	MAP3K12	0.251227	0.00793194	0.024993	0	-0.00745826	0.931434	0.967712	0	31.5334	24.7391	24.582	31.9119	25.4053	23.2135	25.8739	24.706	27.4767	3.95602	3.10364	3.08393	4.00351	3.18722	2.91225	3.24601	3.09948	3.44709
ENSG00000121766.15_4	protein_coding	ZCCHC17	0.0594413	0.347141	0.480352	0	0.00657141	0.91632	0.959551	0	31.1624	29.8869	29.2134	29.5331	29.143	30.5561	30.783	29.0971	27.9239	16.222	15.558	15.2074	15.3738	15.1707	15.9063	16.0245	15.1468	14.5361
ENSG00000121769.7_3	protein_coding	FABP3	0.169268	0.567239	0.681073	0	-0.182233	0.555256	0.745691	0	0.953952	0.99956	1.11968	1.21185	0.704199	1.04894	0.981823	0.772061	0.645927	0.929778	0.97423	1.0913	1.18114	0.686354	1.02236	0.956942	0.752496	0.629558
ENSG00000182796.14_5	transcribed_unitary_pseudogene	TMEM198B	0.802897	0.00105414	0.00483697	1	0.612601	0.00895255	0.0493081	1	10.4405	5.89741	5.80197	11.4901	9.15459	5.01667	7.79683	11.1466	6.3599	2.3853	1.34736	1.32556	2.62511	2.09152	1.14614	1.78132	2.54664	1.45303
ENSG00000229167.2_6	lncRNA	AC114488.1	0.3707	0.131209	0.231787	0	0.029599	0.904634	0.954079	0	2.0139	1.19947	1.47594	1.97486	1.89592	1.32258	1.3861	1.20635	1.39123	2.47712	1.47537	1.81542	2.4291	2.33201	1.62679	1.70492	1.48382	1.71123
ENSG00000113734.17_4	protein_coding	BNIP1	-0.30357	0.00763365	0.0241919	0	-0.0086528	0.931196	0.967578	0	11.9774	13.9938	14.3013	12.0287	14.6257	17.3759	12.4172	16.0203	13.167	4.90877	5.73518	5.86121	4.92979	5.99413	7.12128	5.089	6.56568	5.3963
ENSG00000162517.13_3	protein_coding	PEF1	-0.0162195	0.836977	0.888969	0	0.174332	0.0361263	0.133642	0	58.933	65.2713	59.5465	50.4038	62.132	57.7829	56.7147	61.8614	50.3823	26.5106	29.3618	26.7866	22.6738	27.9496	25.9932	25.5127	27.8279	22.6641
ENSG00000084636.18_5	protein_coding	COL16A1	0.276246	0.135121	0.237045	0	0.0713577	0.696461	0.84169	0	4.13379	2.74879	2.85009	4.2639	3.95435	3.32925	3.06098	3.32951	3.32901	0.446752	0.29707	0.308018	0.460813	0.427359	0.359802	0.330809	0.359831	0.359776
ENSG00000104154.7_3	protein_coding	SLC30A4	-0.400072	0.0126352	0.0364167	0	0.0123095	0.930576	0.967306	0	6.09469	8.39631	7.17612	5.47575	8.28788	9.44046	7.27704	8.2514	8.04924	0.759369	1.04614	0.894109	0.682251	1.03263	1.17624	0.906683	1.02808	1.0029
ENSG00000134668.12_4	protein_coding	SPOCD1	0.008943	0.970044	0.979684	0	0.520109	0.0312028	0.121078	0	1.80191	2.14905	2.08667	2.46858	3.57516	1.59621	1.90589	3.18475	2.53402	0.254327	0.303325	0.29452	0.348423	0.50461	0.225295	0.269004	0.449506	0.35766
ENSG00000184007.21_6	protein_coding	PTP4A2	-0.0946123	0.069139	0.140666	0	0.0411267	0.411511	0.630772	0	266.471	299.118	282.973	273.877	304.431	305.971	275.488	292.804	282.121	39.7243	44.5913	42.1844	40.8284	45.3832	45.6129	41.0686	43.65	42.0574
ENSG00000128512.15	protein_coding	DOCK4	1.1502	3.03927e-08	6.93982e-07	1	-0.0124204	0.929908	0.966823	0	9.00955	3.59842	3.96977	9.02152	4.82106	4.10455	9.76047	4.00507	4.42211	0.793723	0.317013	0.349729	0.794778	0.424725	0.361602	0.859878	0.352838	0.389579
ENSG00000144908.13_3	protein_coding	ALDH1L1	8.36016	1.00549e-20	3.62755e-17	1	0.0571691	0.92985	0.966823	0	50.2945	0.199912	0.152683	48.8329	0.0541692	0.182424	50.9393	0.193015	0.0993734	3.66792	0.0145794	0.011135	3.56133	0.00395049	0.013304	3.71494	0.0140764	0.00724718
ENSG00000025800.14_4	protein_coding	KPNA6	0.0205072	0.657936	0.754896	0	0.0161982	0.726167	0.860531	0	161.43	162.678	160.318	160.772	158.499	157.341	162.694	162.229	160.389	21.6481	21.8155	21.4989	21.5598	21.2551	21.0998	21.8176	21.7553	21.5085
ENSG00000065054.14_5	protein_coding	SLC9A3R2	0.233188	0.0149161	0.0415136	0	-0.00791611	0.929085	0.966413	0	40.49	32.2858	32.4707	35.6372	28.1138	33.5205	37.1938	35.2735	30.3089	11.5159	9.18254	9.23512	10.1357	7.99596	9.5337	10.5784	10.0323	8.62027
ENSG00000160050.14_3	protein_coding	CCDC28B	0.558742	0.0227205	0.0580729	0	0.268165	0.261482	0.479654	0	2.0669	2.19903	1.57773	2.87252	1.57091	1.505	1.79038	1.78539	1.54029	0.733462	0.780352	0.559875	1.01935	0.557454	0.534067	0.635338	0.633567	0.546589
ENSG00000160051.11_3	protein_coding	IQCC	0.140888	0.234708	0.360808	0	0.11893	0.31261	0.537226	0	8.37358	8.14642	7.78685	7.54037	7.15033	7.34258	9.18293	9.26473	7.55238	3.37917	3.2875	3.14239	3.04293	2.88552	2.96311	3.70578	3.7388	3.04777
ENSG00000103740.10_3	protein_coding	ACSBG1	0.790585	0.0093812	0.0286761	1	0.02695	0.929156	0.966413	0	1.48393	0.899604	0.559839	1.3465	0.595861	0.729698	1.21284	0.868569	1.04342	0.182121	0.110408	0.0687088	0.165255	0.0731297	0.0895554	0.148851	0.106599	0.128058
ENSG00000084623.11_2	protein_coding	EIF3I	0.0371749	0.526902	0.647845	0	0.0458688	0.436174	0.651395	0	359.057	373.186	350.459	342.234	367.538	362.477	375.345	342.313	336.13	208.149	216.34	203.165	198.397	213.065	210.132	217.591	198.442	194.858
ENSG00000220785.7_4	transcribed_unprocessed_pseudogene	MTMR9LP	0.345467	0.0265783	0.065778	0	0.0535643	0.719094	0.855997	0	7.15464	6.24725	4.73319	7.58526	6.33779	5.74637	7.68132	5.74221	7.15488	2.41629	2.10985	1.59851	2.56172	2.14042	1.94069	2.59416	1.93928	2.41637
ENSG00000116478.12_5	protein_coding	HDAC1	-0.0382127	0.457415	0.58488	0	-0.125479	0.0225079	0.096269	0	291.167	291.372	312.899	307.54	282.926	317.418	307.888	279.1	300.604	73.4159	73.4674	78.8954	77.544	71.3377	80.0349	77.6319	70.3732	75.7954
ENSG00000135974.10_3	protein_coding	C2orf49	0.216124	0.00365493	0.0134081	0	0.00590625	0.929179	0.966413	0	32.5934	28.1376	30.1804	35.5026	28.9263	28.8231	34.6526	31.751	29.5139	7.09322	6.12353	6.5681	7.72635	6.29518	6.2727	7.54136	6.90991	6.42304
ENSG00000185010.15_5	protein_coding	F8	0.879581	1.33367e-06	1.73077e-05	1	0.0122549	0.92875	0.966176	0	10.1225	4.9978	5.59839	9.15617	5.25441	6.11122	9.99149	5.74221	4.12399	0.923922	0.45617	0.510989	0.835722	0.479592	0.557796	0.911965	0.524115	0.376414
ENSG00000152117.17_5	transcribed_processed_pseudogene	AC073869.1	0.27926	0.00642013	0.0210679	0	0.00837864	0.928368	0.966037	0	41.6029	29.587	34.9645	40.0807	32.5015	28.6862	35.5189	35.1288	33.141	10.6293	7.55927	8.93319	10.2403	8.30391	7.32914	9.07483	8.97516	8.4673
ENSG00000273274.2_4	protein_coding	ZBTB8B	-0.229205	0.528294	0.648724	0	0.146624	0.672312	0.826167	0	1.48393	1.5993	2.13757	1.75044	1.57091	1.41379	0.981823	2.36444	1.4906	0.115652	0.124643	0.166594	0.136423	0.12243	0.110185	0.0765196	0.184275	0.116172
ENSG00000160062.15_4	protein_coding	ZBTB8A	-0.184496	0.101108	0.189492	0	-0.0361064	0.735806	0.866244	0	7.8966	9.24593	9.51727	9.96407	9.96713	9.85092	8.83641	10.4711	11.0801	1.11581	1.30648	1.34482	1.40795	1.40838	1.39196	1.24861	1.47959	1.56565
ENSG00000176261.15_5	protein_coding	ZBTB8OS	-0.173783	0.0580766	0.122619	0	0.0124438	0.884881	0.945025	0	18.4961	21.5405	20.6123	19.8384	20.2593	20.4315	18.2504	22.631	22.9056	5.2382	6.1004	5.83751	5.61834	5.73754	5.78633	5.16861	6.40925	6.48699
ENSG00000173137.12_3	protein_coding	ADCK5	0.370775	0.000473294	0.00250004	0	-0.00820639	0.928008	0.96598	0	21.8349	16.4927	15.5228	21.499	15.059	16.099	19.5209	16.7923	17.0425	7.96313	6.01486	5.66113	7.84064	5.49199	5.87125	7.11924	6.12412	6.21537
ENSG00000162520.14_5	protein_coding	SYNC	0.0299479	0.92524	0.949924	0	0.406442	0.191418	0.395752	0	0.635968	1.09952	1.06878	0.942547	1.73341	0.775304	1.3861	1.01333	1.04342	0.182383	0.315319	0.306505	0.270303	0.497107	0.222341	0.397506	0.290602	0.299232
ENSG00000162522.11_3	protein_coding	KIAA1522	0.0308381	0.561705	0.676398	0	-0.0693895	0.200505	0.407362	0	115.216	108.452	114.004	112.477	103.03	106.536	114.642	107.799	114.577	19.1389	18.0153	18.9375	18.6839	17.1146	17.697	19.0436	17.9068	19.0328
ENSG00000221817.10_6	lncRNA	PPP3CB-AS1	0.819391	7.2939e-05	0.000525503	1	0.0161554	0.92719	0.965629	0	3.76281	2.24901	2.08667	4.30879	2.1126	2.18909	3.92729	2.5092	2.53402	0.65236	0.389912	0.361767	0.747016	0.366262	0.379524	0.680876	0.435021	0.439324
ENSG00000116497.18_4	protein_coding	S100PBP	-0.0365364	0.642115	0.743152	0	0.209541	0.013217	0.0660212	0	39.642	45.0802	39.2396	39.0484	49.944	39.6317	40.4858	46.3237	43.3268	4.3136	4.90535	4.26982	4.24901	5.4346	4.31248	4.40541	5.04066	4.71456
ENSG00000121900.19_3	protein_coding	TMEM54	-0.110978	0.172892	0.28642	0	-0.192138	0.0245635	0.102479	0	44.9947	40.5821	48.4006	42.4146	40.356	48.2513	42.5649	41.8843	43.6746	31.7535	28.6395	34.1571	29.9327	28.4799	34.0517	30.0387	29.5584	30.8219
ENSG00000164300.17_3	protein_coding	SERINC5	0.666668	2.86978e-08	6.6689e-07	1	-0.0068729	0.926764	0.965432	0	117.548	80.6645	76.9016	118.94	71.0699	75.1589	124.923	74.7452	75.5734	12.3229	8.45629	8.0618	12.4689	7.45046	7.87911	13.096	7.83575	7.92258
ENSG00000183576.13_3	protein_coding	SETD3	-0.188415	0.00414654	0.0148964	0	-0.00534611	0.926497	0.965223	0	62.9078	75.8666	71.2523	61.7593	70.7991	75.2957	66.1287	69.8233	70.7041	12.1303	14.6291	13.7393	11.9088	13.652	14.519	12.7514	13.4638	13.6337
ENSG00000179148.9_2	protein_coding	ALOXE3	-0.554495	0.00309706	0.0117214	0	-0.0147586	0.924839	0.963914	0	2.75586	5.34765	5.80197	3.54577	4.71272	4.83425	3.69627	4.48761	4.07431	0.732942	1.42225	1.54308	0.943024	1.25338	1.2857	0.983052	1.19351	1.08359
ENSG00000116525.14_3	protein_coding	TRIM62	0.034717	0.734824	0.813646	0	0.00510278	0.960248	0.982718	0	14.5743	13.1442	12.8763	15.4398	13.3256	14.7764	13.5145	16.2133	14.906	3.66556	3.30589	3.23851	3.88325	3.35151	3.71639	3.39902	4.07779	3.749
ENSG00000160094.15_5	protein_coding	ZNF362	-0.267977	0.0670434	0.137351	0	-0.258658	0.0753985	0.218931	0	6.67766	5.54756	6.66718	5.02692	5.95861	6.20243	4.79361	5.11491	7.00582	1.9733	1.63935	1.97021	1.4855	1.76082	1.83287	1.41655	1.5115	2.07028
ENSG00000225313.5_7	lncRNA	AL513327.1	-0.318887	0.193696	0.312106	0	-0.431558	0.087184	0.240258	0	2.64987	1.69925	3.10456	3.54577	2.92513	2.9644	2.25242	3.28126	4.62086	0.659992	0.423226	0.773241	0.883131	0.728552	0.73833	0.561	0.81725	1.1509
ENSG00000134686.18_4	protein_coding	PHC2	-0.0928218	0.0870715	0.168501	0	-0.0274446	0.598912	0.774982	0	178.124	190.416	189.226	167.998	178.542	186.848	177.421	178.732	182.151	35.8038	38.2746	38.0353	33.7684	35.8877	37.5574	35.6625	35.9261	36.6133
ENSG00000121903.14_2	protein_coding	ZSCAN20	0.199697	0.265208	0.394162	0	-0.194724	0.291001	0.513859	0	12.2424	9.79569	12.4691	12.9264	10.0213	8.34592	11.6664	8.29966	11.4279	2.3064	1.84546	2.34912	2.43526	1.88796	1.57233	2.19788	1.56361	2.15296
ENSG00000163866.9_4	protein_coding	SMIM12	-0.00326866	0.96247	0.975069	0	-0.0600846	0.392591	0.613904	0	34.5543	31.2363	32.6234	32.1812	33.2599	35.2535	35.4611	33.6329	34.3832	3.34277	3.02179	3.15598	3.11321	3.21755	3.41042	3.4305	3.25364	3.32622
ENSG00000239521.8_5	protein_coding	CASTOR3	0.701076	0.000550637	0.00283693	1	0.0174168	0.923188	0.963136	0	6.57167	3.59842	3.61351	7.76479	5.41692	4.83425	8.43213	5.16316	5.51522	1.34831	0.738288	0.741384	1.5931	1.11139	0.991844	1.73002	1.05933	1.13156
ENSG00000189433.7_4	protein_coding	GJB4	0.427506	0.305968	0.43782	0	0.709251	0.0855725	0.23748	0	1.05995	1.29943	0.559839	0.718131	1.02921	0.547273	0.866314	0.868569	0.844674	0.734035	0.899881	0.3877	0.497321	0.712752	0.378998	0.599941	0.601502	0.584954
ENSG00000224717.1_6	lncRNA	AC098936.1	3.10042	3.41275e-08	7.69522e-07	1	-0.0542466	0.923283	0.963136	0	1.80191	0.149934	0.152683	2.10951	0.216677	0.182424	1.61712	0.241269	0.29812	0.624579	0.0519702	0.0529232	0.731199	0.0751046	0.063232	0.560527	0.0836288	0.103335
ENSG00000243749.1_4	protein_coding	TMEM35B	0.166569	0.538829	0.657393	0	0.270778	0.315185	0.539465	0	2.11989	2.69881	1.32326	1.61579	1.51674	1.59621	1.44386	1.35111	1.68935	2.29923	2.92713	1.4352	1.75249	1.64505	1.73125	1.56601	1.46541	1.83226
ENSG00000163867.17_5	protein_coding	ZMYM6	0.0847112	0.424746	0.554256	0	0.22139	0.0441821	0.152863	0	9.9635	11.7948	9.92442	10.2334	12.0256	8.75637	10.0492	9.506	9.88765	1.04134	1.23274	1.03725	1.06954	1.25685	0.915173	1.0503	0.99352	1.03341
ENSG00000197056.11_4	protein_coding	ZMYM1	-0.118718	0.228847	0.354015	0	-0.066005	0.496175	0.700865	0	41.4439	41.9316	43.2603	44.3895	46.2605	43.7819	37.1938	39.7612	46.8049	7.96233	8.05601	8.3113	8.52824	8.8877	8.4115	7.14577	7.63903	8.99229
ENSG00000158480.11_3	protein_coding	SPATA2	0.234836	0.00729353	0.0233273	0	-0.00791155	0.921238	0.962106	0	22.9478	19.4914	19.289	21.5439	19.0134	20.5684	23.8525	19.1568	18.086	5.3479	4.5424	4.49522	5.02072	4.43099	4.79337	5.55873	4.46441	4.21486
ENSG00000146463.11_3	protein_coding	ZMYM4	-0.121629	0.0435824	0.0977827	0	0.0567991	0.322513	0.547229	0	109.545	125.795	116.956	108.797	121.826	118.074	107.134	120.731	119.099	14.3253	16.4502	15.2943	14.2274	15.9313	15.4406	14.01	15.788	15.5746
ENSG00000175309.15_5	protein_coding	PHYKPL	0.407329	0.010015	0.0302229	0	0.0145867	0.921012	0.962013	0	28.9895	16.3928	17.9149	29.2638	21.8302	18.1968	22.0044	23.1136	24.6446	3.43519	1.9425	2.12286	3.46769	2.58682	2.15628	2.60746	2.7389	2.92032
ENSG00000020129.16_4	protein_coding	NCDN	-0.000210628	0.997704	0.998672	0	-0.0848327	0.255766	0.473325	0	72.5533	69.4195	72.2193	68.1776	58.5569	69.002	65.1468	66.1077	64.7417	14.7556	14.1183	14.6877	13.8657	11.9091	14.0334	13.2493	13.4447	13.1669
ENSG00000170846.17_5	protein_coding	AC093323.1	0.378272	7.09756e-05	0.000513629	0	-0.00763214	0.92046	0.961711	0	46.7436	36.484	36.3387	49.9101	37.16	38.5372	47.9938	37.1072	36.4203	12.988	10.1372	10.0969	13.8678	10.3251	10.7077	13.3353	10.3104	10.1196
ENSG00000126067.12_3	protein_coding	PSMB2	-0.0934574	0.106855	0.197442	0	0.041994	0.454776	0.666721	0	163.285	178.322	172.38	169.838	195.334	188.855	170.606	179.746	176.139	36.0611	39.382	38.0697	37.5084	43.1391	41.7082	37.678	39.6964	38.9
ENSG00000106261.17_4	protein_coding	ZKSCAN1	0.255416	0.0111958	0.0331147	0	0.00939391	0.918811	0.960891	0	134.825	123.995	124.081	143.357	113.918	107.174	150.854	123.723	128.241	13.0657	12.0162	12.0245	13.8925	11.0396	10.3861	14.6191	11.9898	12.4277
ENSG00000161202.20_5	protein_coding	DVL3	0.198902	0.00150015	0.00649136	0	0.00554079	0.918737	0.960891	0	106.313	91.7596	91.1011	103.949	87.0498	89.844	99.9149	92.4543	89.3367	16.8697	14.5604	14.4559	16.4947	13.813	14.2564	15.8545	14.6706	14.1759
ENSG00000111726.13_3	protein_coding	CMAS	-0.302778	0.000127576	0.000834941	0	0.00636713	0.918958	0.960891	0	35.6142	49.928	47.281	39.2279	47.5605	47.704	40.7745	45.7446	47.5998	18.0416	25.2928	23.9519	19.8723	24.0935	24.1662	20.6558	23.1736	24.1134
ENSG00000092847.12_5	protein_coding	AGO1	-0.0850822	0.245337	0.372719	0	-0.0881331	0.229223	0.443736	0	124.703	130.742	140.723	132.091	125.618	128.016	129.832	129.465	141.508	8.97788	9.41271	10.1313	9.50981	9.04379	9.21644	9.34713	9.32074	10.1877
ENSG00000167515.10_2	protein_coding	TRAPPC2L	0.432784	3.32372e-06	3.78568e-05	0	0.00690344	0.918802	0.960891	0	76.5811	55.3257	57.3072	74.1919	54.6567	56.0499	75.3116	58.2424	54.1088	17.1591	12.3965	12.8405	16.6238	12.2466	12.5588	16.8747	13.05	12.1239
ENSG00000116863.11_3	protein_coding	ADPRHL2	-0.0655424	0.44462	0.573295	0	-0.0159111	0.851006	0.928512	0	35.4552	35.1845	37.1021	29.578	35.4266	36.2112	36.5585	34.2602	32.6938	21.475	21.311	22.4725	17.9152	21.4577	21.9329	22.1432	20.7512	19.8024
ENSG00000054116.12_3	protein_coding	TRAPPC3	0.0360546	0.563335	0.677513	0	0.103712	0.1063	0.27326	0	58.721	63.0223	61.8877	61.9837	63.1612	60.7017	62.6634	65.963	56.2453	16.649	17.8685	17.5468	17.5741	17.9079	17.2106	17.7668	18.7023	15.9471
ENSG00000196182.10_3	protein_coding	STK40	0.211361	0.00991927	0.0299906	0	-0.00790026	0.916254	0.959551	0	50.3475	43.9307	42.904	46.1848	38.0267	39.0388	45.2216	39.7612	40.5443	9.0067	7.8588	7.67514	8.26204	6.80264	6.98369	8.08973	7.11291	7.25301
ENSG00000054118.15_6	protein_coding	THRAP3	-0.00193327	0.972058	0.981101	0	0.0204643	0.711244	0.85067	0	354.181	367.538	357.788	371.049	377.992	361.611	388.917	385.982	396.202	75.0384	77.8683	75.8026	78.6121	80.0831	76.6125	82.3977	81.7759	83.941
ENSG00000108679.13_4	protein_coding	LGALS3BP	0.49982	3.22928e-07	5.17572e-06	0	0.0068408	0.916397	0.959551	0	562.726	401.174	390.106	528.679	377.342	392.349	541.966	382.026	372.6	164.444	117.234	113.999	154.494	110.27	114.655	158.377	111.638	108.884
ENSG00000142694.6_2	protein_coding	EVA1B	0.168	0.181969	0.297766	0	0.0789729	0.524569	0.723383	0	9.43353	8.79613	7.48149	7.94432	7.31284	6.79531	7.68132	7.43109	8.04924	7.78986	7.26353	6.17794	6.56013	6.03868	5.61132	6.34296	6.13632	6.64677
ENSG00000116883.8_7	lncRNA	AL591845.1	0.253312	0.287534	0.41837	0	0.333285	0.162813	0.358929	0	3.28583	2.14905	2.90099	3.45601	4.00852	2.00667	2.31017	3.52253	2.78245	1.78772	1.16924	1.57834	1.88031	2.18091	1.09177	1.25689	1.9165	1.51385
ENSG00000138767.13_4	protein_coding	CNOT6L	-0.417463	9.87311e-05	0.000675896	0	0.00884289	0.915506	0.959244	0	22.9478	33.3853	35.0154	25.3141	35.5891	29.2791	25.9894	30.8824	34.9794	2.44986	3.56414	3.73817	2.70248	3.79942	3.12577	2.77457	3.29694	3.73433
ENSG00000181817.6_3	protein_coding	LSM10	-0.225214	0.0204329	0.0533601	0	0.0291929	0.741814	0.869542	0	26.1277	30.0368	29.7733	23.7881	28.7097	29.2791	23.968	29.3383	27.278	17.3491	19.9447	19.7698	15.7955	19.0635	19.4416	15.915	19.481	18.1129
ENSG00000116885.18_4	protein_coding	OSCP1	0.0559149	0.727132	0.807669	0	0.238164	0.140595	0.327036	0	3.07385	3.54844	2.64651	3.23159	3.30432	3.23803	3.23424	3.95681	3.27932	1.10253	1.27275	0.949251	1.15911	1.18519	1.16142	1.16006	1.41923	1.17623
ENSG00000096433.11_3	protein_coding	ITPR3	-0.216691	0.00448852	0.0158971	0	-0.00721157	0.915217	0.959011	0	348.192	410.669	413.416	327.288	363.15	350.437	326.889	385.114	401.071	35.2779	41.6078	41.8861	33.1599	36.7933	35.5053	33.1195	39.0186	40.6353
ENSG00000233621.2_7	lncRNA	LINC01137	0.566157	0.0764124	0.152056	0	-0.929695	0.0200814	0.0888397	0	0.900955	0.399824	0.763417	1.43626	0.595861	1.00333	2.0214	0.530792	1.14279	0.298428	0.132436	0.252871	0.475741	0.19737	0.33234	0.669559	0.175817	0.378534
ENSG00000163874.11_4	protein_coding	ZC3H12A	-0.155779	0.193194	0.311645	0	-0.00552526	0.961744	0.983433	0	8.53257	8.74615	10.0771	7.94432	8.28788	7.57061	7.16153	9.21648	8.79454	2.76046	2.82955	3.26014	2.57015	2.68129	2.44924	2.3169	2.98172	2.84521
ENSG00000163875.15_3	protein_coding	MEAF6	0.158726	0.0228955	0.0584375	0	0.00453203	0.944503	0.974554	0	55.0642	51.5273	47.5863	52.9173	46.423	52.6751	56.6569	49.8462	47.0533	15.7913	14.777	13.6468	15.1756	13.3132	15.1061	16.248	14.2949	13.4939
ENSG00000163877.11_3	protein_coding	SNIP1	0.0440691	0.556297	0.672355	0	0.0121412	0.870644	0.938893	0	31.9044	30.7865	30.0786	29.0394	31.3639	32.9276	34.9413	31.4132	29.7126	5.57964	5.38413	5.26034	5.0786	5.48512	5.75859	6.11076	5.49375	5.19633
ENSG00000278540.5_5	protein_coding	ACACA	-0.0379638	0.565522	0.679407	0	0.189445	0.00894041	0.0492627	0	349.358	424.063	382.574	382.943	426.582	338.717	369.339	439.158	409.915	26.8428	32.5827	29.3948	29.4232	32.7762	26.0251	28.3779	33.7425	31.4956
ENSG00000116922.14_5	protein_coding	C1orf109	0.0265545	0.641755	0.742795	0	0.00120123	0.983157	0.993066	0	55.4352	55.7755	57.0018	56.0142	55.2525	55.5026	56.5992	54.0925	52.4691	12.5023	12.579	12.8556	12.6329	12.4611	12.5175	12.7648	12.1995	11.8334
ENSG00000134690.11_3	protein_coding	CDCA8	-0.0374703	0.516077	0.638192	0	0.0278462	0.627821	0.795093	0	114.951	119.298	115.785	116.292	126.756	125.599	117.414	118.801	116.366	47.7769	49.5833	48.1234	48.3343	52.6832	52.2025	48.8007	49.3769	48.365
ENSG00000183317.17_5	protein_coding	EPHA10	0.225723	0.104637	0.194443	0	0.295827	0.0367661	0.135279	0	13.9383	12.2946	11.7566	14.9012	18.2008	11.4471	15.6514	16.2615	14.8563	1.7098	1.50817	1.44218	1.82792	2.23268	1.40421	1.91995	1.99479	1.82241
ENSG00000127947.16_3	protein_coding	PTPN12	-0.22379	0.000730171	0.00357675	0	0.00594635	0.914949	0.9588	0	85.0607	102.655	102.807	87.8813	105.63	108.223	92.2913	102.684	98.5784	15.3956	18.5801	18.6076	15.9061	19.1185	19.5879	16.7043	18.5854	17.8422
ENSG00000187951.11_6	lncRNA	AC091057.1	0.336708	0.00439417	0.0156415	0	-0.0114774	0.91473	0.958711	0	28.7246	19.6414	25.8544	30.2961	23.7803	18.4249	26.6825	24.0304	23.8496	5.09572	3.48436	4.58655	5.37452	4.2186	3.26856	4.73345	4.26298	4.2309
ENSG00000197982.14_5	protein_coding	C1orf122	0.0524166	0.467019	0.593636	0	0.0449963	0.531204	0.727561	0	38.2641	37.9833	35.5752	36.7144	34.3432	36.0288	34.4216	36.5281	33.936	17.1511	17.0252	15.9459	16.4565	15.3937	16.1492	15.4288	16.373	15.2111
ENSG00000188786.10_3	protein_coding	MTF1	-0.138589	0.0363279	0.08472	0	-0.0211031	0.733498	0.865221	0	52.3084	59.5738	60.7171	56.5528	60.6695	56.734	54.5778	57.1808	62.6052	6.54755	7.45698	7.60009	7.07883	7.59412	7.10151	6.83162	7.15744	7.83643
ENSG00000204084.13_4	protein_coding	INPP5B	-0.00777177	0.904659	0.936388	0	-0.0417212	0.52272	0.721923	0	30.0495	28.5874	30.2313	31.3285	30.4431	31.9699	30.3788	30.6412	30.0604	3.365	3.20128	3.38537	3.50823	3.40908	3.58005	3.40188	3.43126	3.36623
ENSG00000183431.12_3	protein_coding	SF3A3	-0.123285	0.0240134	0.0607108	0	0.0175866	0.729052	0.862409	0	188.565	208.908	204.596	184.245	214.672	212.433	198.155	205.851	204.709	48.4244	53.6487	52.5413	47.3152	55.129	54.554	50.8872	52.8636	52.5704
ENSG00000183386.10_3	protein_coding	FHL3	-0.131001	0.187319	0.304655	0	-0.0661842	0.495299	0.700262	0	20.8809	23.1398	24.0222	22.7558	22.6969	22.0277	19.4054	20.3149	23.2037	10.4196	11.5468	11.9871	11.3552	11.3258	10.9919	9.68335	10.1372	11.5787
ENSG00000183520.12_4	protein_coding	UTP11	-0.0167912	0.767197	0.837601	0	0.0302037	0.594514	0.77168	0	71.2284	75.7667	74.764	71.5438	78.762	76.6639	77.6795	73.1528	71.4494	21.0673	22.4095	22.113	21.1605	23.2955	22.6749	22.9753	21.6364	21.1326
ENSG00000116954.8_3	protein_coding	RRAGC	-0.181589	0.0989611	0.186267	0	-0.054385	0.604602	0.777916	0	13.4083	15.2933	14.3522	11.894	14.2465	17.4215	15.1894	14.4761	13.8626	2.62086	2.9893	2.80536	2.32487	2.78469	3.4053	2.96899	2.82958	2.70965
ENSG00000137216.19_3	protein_coding	TMEM63B	0.198759	0.004185	0.0150121	0	0.00664941	0.914543	0.958652	0	75.3622	61.323	66.2137	75.6282	68.7948	66.8585	74.3298	67.1693	63.2511	17.031	13.8583	14.9636	17.0911	15.5469	15.1093	16.7977	15.1795	14.294
ENSG00000174574.16_4	protein_coding	AKIRIN1	-0.0724631	0.196416	0.315588	0	-0.15376	0.010693	0.0565445	0	115.852	113.55	122.198	118.671	111.426	132.668	120.937	110.984	118.801	43.0998	42.2433	45.4604	44.1485	41.4531	49.3557	44.9916	41.2886	44.1967
ENSG00000168653.11_3	protein_coding	NDUFS5	-0.131156	0.0426757	0.0962271	0	0.142846	0.0278758	0.111774	0	101.437	120.547	106.929	97.7107	123.831	114.335	98.471	115.52	104.59	185.104	219.976	195.126	178.304	225.968	208.64	179.692	210.802	190.859
ENSG00000119771.15_4	protein_coding	KLHL29	-0.206537	0.00606984	0.0201458	0	-0.00719461	0.914021	0.95849	0	24.1138	28.1376	28.3991	24.8204	26.8137	27.2268	22.5819	27.2634	27.0296	2.17065	2.53287	2.55641	2.23426	2.41369	2.45088	2.03276	2.45417	2.43312
ENSG00000183682.8_4	protein_coding	BMP8A	0.144808	0.156692	0.266276	0	0.258741	0.0155104	0.0738198	0	11.2884	11.395	10.2807	10.4578	11.3755	9.94213	11.3776	12.9803	9.6889	2.00292	2.02182	1.82411	1.85553	2.01837	1.76404	2.01874	2.3031	1.71911
ENSG00000243970.3_4	transcribed_unprocessed_pseudogene	PPIEL	0.402407	0.0767293	0.152581	0	0.0128561	0.954353	0.979187	0	8.79756	4.548	6.05644	8.93175	7.42117	4.05894	6.6995	6.80379	8.54611	1.62436	0.839734	1.11825	1.64914	1.37023	0.749436	1.23698	1.25624	1.57794
ENSG00000166855.9_3	protein_coding	CLPX	-0.188286	0.00561987	0.0189886	0	-0.00653221	0.914008	0.95849	0	69.8505	79.2651	81.0749	71.9477	81.1996	86.0131	73.8677	84.1064	78.5546	12.7908	14.5148	14.8462	13.1748	14.869	15.7504	13.5264	15.4013	14.3847
ENSG00000228060.3_7	lncRNA	PABPC4-AS1	-0.0503324	0.833226	0.886493	0	0.200473	0.392853	0.614155	0	1.64292	1.84919	2.03578	2.24416	2.65429	1.77864	2.36793	2.94348	2.68308	1.16684	1.31334	1.44587	1.59386	1.88515	1.26324	1.68177	2.09054	1.9056
ENSG00000201457.1	snoRNA	SNORA55	-0.0426788	0.879126	0.918081	0	-0.352314	0.219673	0.432602	0	1.32493	0.74967	1.01789	0.98743	0.920876	0.957728	0.693051	0.772061	1.14279	9.81432	5.55311	7.53992	7.3143	6.8213	7.09428	5.13371	5.71897	8.46514
ENSG00000128915.12_6	protein_coding	ICE2	-0.248133	0.000957649	0.00446233	0	-0.00692773	0.913111	0.958196	0	60.205	73.4677	76.5453	64.3176	76.3243	74.0643	64.165	73.2976	73.5363	3.76046	4.58886	4.78109	4.01734	4.76729	4.62613	4.00781	4.57824	4.59315
ENSG00000121486.12_4	protein_coding	TRMT1L	-0.272663	0.00457615	0.0161463	0	0.00932769	0.911988	0.957514	0	39.801	48.4287	47.1283	35.1435	45.5021	46.7919	39.966	45.5516	44.6683	8.09951	9.85525	9.59062	7.15172	9.25969	9.52215	8.13308	9.26976	9.09001
ENSG00000084072.16_3	protein_coding	PPIE	-0.0265654	0.611485	0.717076	0	-0.038028	0.468631	0.679205	0	93.5933	91.8596	96.9031	93.1326	93.6585	96.6849	91.7138	90.7654	90.0323	11.5962	11.3814	12.0063	11.5392	11.6043	11.9793	11.3634	11.2459	11.155
ENSG00000038274.17_4	protein_coding	MAT2B	-0.204585	0.00153125	0.00660217	0	-0.0061387	0.911818	0.957514	0	81.6159	96.1077	96.0888	79.3535	93.8752	98.2355	87.44	94.867	91.7216	15.894	18.7162	18.7125	15.4535	18.2814	19.1306	17.0282	18.4746	17.862
ENSG00000198754.5_3	protein_coding	OXCT2	0.131905	0.647692	0.747627	0	-0.214057	0.478967	0.687417	0	1.27194	0.899604	1.27236	1.30161	0.975045	0.729698	0.80856	0.820315	1.14279	0.69657	0.492664	0.696803	0.712822	0.533979	0.399615	0.442804	0.449242	0.625845
ENSG00000043514.16_4	protein_coding	TRIT1	-0.0513154	0.575866	0.68741	0	0.131879	0.155839	0.349155	0	29.8375	30.5366	30.4858	30.9245	40.031	35.0255	34.1905	37.2037	32.6938	4.5672	4.6742	4.66643	4.73359	6.12751	5.36132	5.23351	5.69473	5.00441
ENSG00000101665.9_3	protein_coding	SMAD7	-2.31624	2.09143e-08	5.12896e-07	-1	0.0213247	0.91198	0.957514	0	0.741963	4.94782	5.4966	0.897664	3.90018	3.96773	0.981823	4.43935	3.67681	0.14742	0.983076	1.09211	0.178356	0.774921	0.788343	0.195077	0.882049	0.730541
ENSG00000168389.17_3	protein_coding	MFSD2A	-0.146301	0.149184	0.256187	0	-0.180565	0.079282	0.226424	0	11.8184	11.5449	12.8763	10.9964	9.80462	13.089	12.3594	12.8355	12.8689	2.94944	2.88119	3.21345	2.74429	2.44687	3.26652	3.08446	3.20327	3.21159
ENSG00000112306.8_3	protein_coding	RPS12	0.208974	0.00502919	0.0173835	0	-0.00742902	0.911051	0.957148	0	1137.06	950.282	964.908	1134.92	1021.14	1075.03	1159.53	982.11	928.743	1779.43	1487.14	1510.03	1776.08	1598.03	1682.36	1814.61	1536.95	1453.43
ENSG00000131238.17_5	protein_coding	PPT1	-0.116664	0.0745018	0.14917	0	-0.117919	0.0714944	0.211718	0	87.6046	90.7601	96.6995	87.6569	93.496	105.259	94.1972	84.9267	89.9826	17.2179	17.8381	19.0054	17.2282	18.3758	20.6877	18.5136	16.6916	17.6853
ENSG00000117000.9_3	protein_coding	RLF	-0.101069	0.220734	0.344817	0	-0.123449	0.138525	0.324319	0	58.1381	56.5751	63.16	60.5474	61.5903	61.7507	61.6816	59.4487	68.5676	9.32896	9.07816	10.1348	9.71557	9.88292	9.90864	9.89756	9.53927	11.0025
ENSG00000259943.1_6	lncRNA	AL050341.2	0.39603	0.0490751	0.107483	0	0.0211056	0.914823	0.958737	0	2.70286	2.14905	2.13757	2.69299	2.54595	2.41712	3.75403	2.31618	2.33527	1.75397	1.39458	1.38713	1.74756	1.65214	1.56854	2.4361	1.50304	1.51543
ENSG00000164603.12_6	protein_coding	BMT2	-0.369836	0.0155473	0.0428912	0	0.0151869	0.910786	0.956954	0	4.18679	7.64664	6.92165	6.01435	6.77114	6.88652	5.65992	6.36951	6.75739	1.02192	1.8664	1.68944	1.46799	1.65271	1.68087	1.38148	1.55468	1.64935
ENSG00000049089.15_6	protein_coding	COL9A2	0.264152	0.0630692	0.130675	0	0.345375	0.0175429	0.0807017	0	7.68461	7.4967	6.31091	7.27108	7.63785	5.9744	6.81501	7.91363	5.86303	1.82316	1.77858	1.49725	1.72505	1.81206	1.41741	1.61685	1.87749	1.39099
ENSG00000164877.19_3	protein_coding	MICALL2	0.538559	0.000107287	0.000721464	0	-0.0128899	0.909483	0.956405	0	67.9426	36.5339	46.2122	68.8957	44.9062	40.3614	56.7147	50.763	46.9539	7.71111	4.1464	5.24483	7.81928	5.09661	4.5808	6.43681	5.76132	5.32901
ENSG00000120265.17_6	protein_coding	PCMT1	-0.245524	0.000790049	0.00380802	0	-0.00700368	0.909191	0.956238	0	52.9443	61.423	57.1036	49.4164	61.3737	63.7117	50.3617	57.3738	60.1209	18.695	21.6889	20.1637	17.4493	21.6715	22.4971	17.7831	20.2591	21.2291
ENSG00000117010.17_4	protein_coding	ZNF684	0.0192975	0.900761	0.933972	0	-0.211134	0.190871	0.395019	0	3.86881	3.89829	4.52961	4.35367	3.90018	4.92546	5.89094	4.14983	4.37243	1.2476	1.25711	1.46069	1.40396	1.25772	1.58835	1.89969	1.33822	1.41001
ENSG00000272711.1_6	lncRNA	AC019069.1	-0.727423	0.0026469	0.0102571	-1	0.0224113	0.908805	0.955971	0	1.80191	3.99824	2.85009	2.10951	3.90018	3.28364	2.25242	2.5092	4.07431	1.35177	2.99943	2.1381	1.58253	2.92587	2.46335	1.68974	1.88237	3.0565
ENSG00000066136.20_3	protein_coding	NFYC	0.0189848	0.747871	0.822852	0	0.0868238	0.151139	0.342248	0	54.5343	57.4247	52.1159	50.1794	52.7608	51.991	51.6901	53.6583	50.1835	9.10422	9.58677	8.70049	8.3772	8.80814	8.67963	8.6294	8.95797	8.37789
ENSG00000181924.7_5	protein_coding	COA4	-0.250535	0.000715459	0.00352262	0	-0.179904	0.0089011	0.0490649	0	44.1998	45.43	53.6428	45.0178	48.7522	55.0922	45.5681	47.3853	51.5748	20.4723	21.0422	24.8461	20.8512	22.5809	25.5174	21.1061	21.9478	23.8883
ENSG00000179862.6_2	protein_coding	CITED4	-0.522956	0.101843	0.190671	0	0.0132077	0.963516	0.984389	0	1.21894	2.44892	1.8322	1.21185	1.73341	2.28031	1.50161	1.49587	1.4906	0.926245	1.86088	1.39225	0.920856	1.31718	1.73275	1.14104	1.13668	1.13268
ENSG00000186280.7_4	protein_coding	KDM4D	-0.445794	0.0129568	0.0371535	0	-0.0180208	0.908553	0.955845	0	2.80886	4.39807	3.46082	2.82764	3.95435	4.65182	3.52301	3.90856	4.27305	0.951833	1.49036	1.17276	0.958197	1.34	1.57635	1.19384	1.32449	1.448
ENSG00000281207.1_5	lncRNA	SLFNL1-AS1	0.4921	0.0446721	0.099685	0	0.196527	0.412723	0.631669	0	4.45178	2.39894	2.90099	3.18671	2.54595	1.68743	2.6567	3.42602	2.78245	0.927453	0.49978	0.604372	0.663897	0.530406	0.351547	0.553479	0.713755	0.579678
ENSG00000171790.15_3	protein_coding	SLFNL1	0.326892	0.273145	0.402927	0	0.172771	0.563675	0.751254	0	2.11989	1.14949	1.73041	2.19928	2.00426	1.505	1.55937	2.17142	1.4906	0.491855	0.266704	0.401488	0.510273	0.465025	0.349188	0.361802	0.50381	0.345847
ENSG00000135912.11_6	protein_coding	TTLL4	-0.23579	0.0012415	0.00553903	0	-0.00718262	0.907987	0.955377	0	56.9191	66.6707	70.1835	57.4056	64.0279	61.7963	52.4986	64.9014	64.6921	7.3969	8.66416	9.12066	7.46012	8.32072	8.0307	6.82244	8.43423	8.40703
ENSG00000204060.7_4	protein_coding	FOXO6	0.232133	0.137717	0.240663	0	-0.255037	0.119219	0.294649	0	5.40573	4.14818	4.68229	4.84738	3.521	4.42379	5.19789	3.32951	4.02462	2.25427	1.72985	1.95258	2.02143	1.4683	1.84478	2.16759	1.38845	1.67832
ENSG00000100644.17_5	protein_coding	HIF1A	-0.346205	0.000118998	0.00078593	0	0.00838408	0.90702	0.954797	0	163.656	229.399	212.586	170.825	215.485	229.672	182.099	215.502	214.249	31.7716	44.5349	41.2709	33.1635	41.8336	44.5879	35.3522	41.8368	41.5937
ENSG00000198815.9_6	protein_coding	FOXJ3	0.0343035	0.595986	0.704569	0	-0.0404935	0.532461	0.727858	0	112.884	113.05	110.237	125.673	115.055	119.442	120.591	113.01	121.086	16.3695	16.3936	15.9857	18.224	16.6844	17.3205	17.4871	16.3878	17.5589
ENSG00000186185.13_2	protein_coding	KIF18B	0.172383	0.0133561	0.0380161	0	0.00755864	0.906012	0.95468	0	124.332	100.956	107.794	112.612	99.0212	94.8607	107.076	106.882	102.752	26.7093	21.6876	23.1567	24.1916	21.272	20.3782	23.0025	22.9607	22.0735
ENSG00000135070.15_6	protein_coding	ISCA1	0.227299	0.00340822	0.0126894	0	-0.00815579	0.9063	0.95468	0	38.3171	31.6861	31.0965	36.2207	35.0474	32.7452	40.0815	30.5929	33.936	11.7862	9.74656	9.56522	11.1414	10.7805	10.0723	12.329	9.41031	10.4386
ENSG00000186409.17_6	protein_coding	CCDC30	0.498114	0.0409932	0.0932626	0	0.28647	0.231535	0.446696	0	2.0139	1.79921	1.11968	1.92998	1.51674	1.36818	1.67487	1.54412	1.4906	0.0798976	0.0713802	0.0444211	0.0765682	0.0601736	0.0542801	0.0664474	0.0612601	0.0591367
ENSG00000171960.11_5	protein_coding	PPIH	-0.00299074	0.964125	0.975946	0	-0.125437	0.072553	0.213589	0	54.5343	51.7772	59.6483	58.6623	52.5441	58.4214	56.4837	51.6316	52.022	37.7139	35.8072	41.2506	40.5687	36.3375	40.4021	39.062	35.7065	35.9765
ENSG00000285728.2_2	lncRNA	AC098484.4	0.215797	0.339762	0.473176	0	0.010402	0.963476	0.984389	0	3.76281	2.09908	3.25725	4.30879	3.6835	3.46606	3.98505	4.68062	3.67681	1.13509	0.633206	0.982578	1.29978	1.11116	1.04557	1.20213	1.41195	1.10914
ENSG00000065978.19_4	protein_coding	YBX1	0.0142215	0.810852	0.869605	0	0.155309	0.0160554	0.0756185	0	1099.27	1239.5	1072.7	1031.01	1178.78	1129.53	1119.57	1165.33	1015.6	323.791	365.097	315.965	303.685	347.209	332.703	329.769	343.249	299.145
ENSG00000117385.15_3	protein_coding	P3H1	0.0618358	0.370085	0.502629	0	-0.135037	0.061605	0.191229	0	46.4257	38.9829	42.904	44.8383	38.0809	40.5894	41.8719	39.1339	44.1715	6.86161	5.76158	6.34112	6.627	5.62828	5.99903	6.18857	5.7839	6.52845
ENSG00000164008.16_5	protein_coding	C1orf50	-0.238839	0.218024	0.341692	0	-0.233375	0.227664	0.442211	0	3.02085	3.09864	3.15546	3.90484	3.73767	3.55728	2.48343	2.75047	4.52149	0.571481	0.586197	0.596946	0.738713	0.707089	0.672962	0.469813	0.520331	0.85537
ENSG00000177868.12_3	protein_coding	SVBP	-0.199006	0.0946423	0.179803	0	0.133764	0.236823	0.452722	0	5.56472	7.84655	7.22702	6.01435	6.98782	7.06895	6.52623	7.91363	6.45927	4.11288	5.79937	5.34147	4.44519	5.16469	5.22465	4.82353	5.84895	4.77403
ENSG00000164010.15_7	protein_coding	ERMAP	-0.0263695	0.811343	0.869809	0	0.0569218	0.60414	0.777729	0	8.0026	8.34633	7.78685	7.58526	7.9087	8.07228	7.50806	8.20315	7.65175	1.39906	1.45915	1.36134	1.32609	1.38264	1.41124	1.3126	1.43412	1.33772
ENSG00000228192.8_6	lncRNA	AL512353.1	0.0225471	0.936218	0.957178	0	-0.544077	0.0855023	0.237377	0	0.900955	0.549758	0.814312	1.0772	0.812537	0.866516	0.866314	0.579046	1.14279	0.2386	0.145593	0.215655	0.285274	0.215185	0.22948	0.229426	0.153349	0.302647
ENSG00000164011.18_4	protein_coding	ZNF691	0.062368	0.602153	0.709307	0	-0.0584545	0.627813	0.795093	0	11.2884	9.39587	8.65206	10.5027	9.64211	10.3982	9.12518	9.45775	10.5833	5.54442	4.61487	4.24954	5.15848	4.73581	5.10717	4.48191	4.64526	5.19807
ENSG00000151692.15_3	protein_coding	RNF144A	-0.544795	2.45685e-06	2.95456e-05	0	-0.00938381	0.905868	0.95468	0	17.6481	26.9881	25.2946	18.1328	27.2471	29.0967	19.983	26.4914	26.7811	2.73614	4.18421	3.92164	2.81129	4.22435	4.51112	3.09814	4.10719	4.15211
ENSG00000117395.12_4	protein_coding	EBNA1BP2	-0.0666925	0.23866	0.364788	0	0.0992842	0.0852545	0.237049	0	141.768	164.178	148.561	132.271	157.957	151.412	147.1	150.166	140.862	39.8113	46.1044	41.7189	37.1443	44.3576	42.5196	41.3087	42.1696	39.5568
ENSG00000243710.7_5	protein_coding	CFAP57	0.237098	0.519846	0.641449	0	0.776051	0.033361	0.126327	0	1.11294	1.04954	0.916101	0.897664	1.57091	0.410455	0.80856	1.49587	1.09311	0.193085	0.182085	0.158935	0.155736	0.272537	0.0712101	0.140278	0.259519	0.189644
ENSG00000138386.17_6	protein_coding	NAB1	-1.50298	6.35692e-11	3.41548e-09	-1	-0.0121574	0.905672	0.954554	0	14.9452	39.6326	36.186	14.6768	40.3019	40.3158	12.6482	39.2304	43.6249	3.05816	8.10979	7.40454	3.00323	8.24675	8.2496	2.58813	8.02749	8.92673
ENSG00000101017.13_6	protein_coding	CD40	-0.433789	6.1219e-05	0.000455387	0	0.00980115	0.905393	0.954363	0	18.0191	23.6396	23.5132	15.754	23.4011	23.1223	17.3263	22.3415	22.2596	7.13063	9.35481	9.30481	6.23427	9.26042	9.1501	6.85646	8.84112	8.80872
ENSG00000234694.1_6	lncRNA	AL139289.2	0.118791	0.661504	0.757124	0	0.598103	0.0286004	0.113795	0	1.11294	1.69925	0.916101	1.3465	1.89592	1.41379	1.03958	1.35111	0.89436	1.68373	2.57073	1.38593	2.03706	2.86826	2.13886	1.57273	2.04404	1.35304
ENSG00000117399.14_3	protein_coding	CDC20	0.124698	0.0617838	0.12864	0	-0.0237436	0.709342	0.849183	0	399.865	373.586	371.631	382.001	358.329	370.139	409.998	343.326	351.285	198.74	185.679	184.707	189.861	178.096	183.966	203.776	170.639	174.595
ENSG00000166352.16_6	protein_coding	C11orf74	-0.82089	0.000387278	0.00211377	-1	0.0208782	0.905185	0.954249	0	2.22589	2.59886	3.76619	2.01974	4.11686	3.60288	1.84814	4.24634	3.42838	1.5101	1.76313	2.55508	1.37025	2.79298	2.44429	1.25382	2.88083	2.3259
ENSG00000159479.17_3	protein_coding	MED8	-0.0415806	0.562119	0.676479	0	-0.118142	0.111262	0.282381	0	31.0564	32.1359	32.4198	30.2064	28.9805	33.9309	32.6889	27.8907	30.2095	11.4854	11.8846	11.9896	11.171	10.7176	12.5484	12.0891	10.3146	11.1722
ENSG00000205352.11_7	protein_coding	PRR13	-0.193684	0.00781707	0.0246791	0	0.00779119	0.905098	0.954227	0	76.3692	87.4115	86.5206	76.3014	90.7875	92.6716	76.5822	85.4575	82.9271	27.0429	30.9531	30.6376	27.0189	32.1486	32.8157	27.1183	30.2612	29.3651
ENSG00000224470.8_4	protein_coding	ATXN1L	0.238818	0.00523677	0.0179633	0	-0.00920374	0.904794	0.954117	0	75.8922	61.473	62.8038	81.5527	68.3615	65.4448	78.8346	69.196	72.0457	8.8742	7.18814	7.34375	9.5361	7.99362	7.65257	9.21826	8.09121	8.42443
ENSG00000066135.13_5	protein_coding	KDM4A	-0.0191851	0.773826	0.842036	0	0.0648763	0.334517	0.559279	0	40.119	49.4782	44.4309	43.4469	43.227	42.4137	44.5286	43.0424	42.979	7.739	9.54441	8.57077	8.38096	8.33854	8.18165	8.58961	8.30293	8.2907
ENSG00000236200.6_6	lncRNA	KDM4A-AS1	0.0466299	0.851445	0.8997	0	-0.161977	0.526416	0.724255	0	1.9609	1.24945	1.52683	2.19928	1.95009	1.55061	1.84814	2.02666	2.78245	0.464999	0.296289	0.362066	0.521526	0.462435	0.367704	0.438259	0.480593	0.659818
ENSG00000126091.20_6	protein_coding	ST3GAL3	0.532397	0.133743	0.235171	0	-0.036508	0.920967	0.962013	0	1.9079	0.649714	0.712523	1.39138	1.02921	0.775304	1.21284	1.35111	1.63966	0.0979668	0.0333614	0.0365865	0.0714443	0.052848	0.0398102	0.0622768	0.0693765	0.0841931
ENSG00000154328.16_3	protein_coding	NEIL2	-0.153172	0.0174366	0.0470614	0	-0.00707415	0.904597	0.954079	0	48.1216	56.0254	54.8133	48.3392	52.0566	54.5449	48.8601	52.6932	52.2207	14.2964	16.6445	16.2844	14.361	15.4654	16.2047	14.5158	15.6545	15.5142
ENSG00000117408.11_3	protein_coding	IPO13	0.0765562	0.372849	0.505125	0	-0.0766601	0.374749	0.596945	0	48.2276	44.0806	43.2603	42.9532	35.9142	41.2279	43.7777	41.2088	43.4758	9.50859	8.69097	8.52924	8.46869	7.08087	8.12853	8.63126	8.12476	8.57174
ENSG00000132768.14_3	protein_coding	DPH2	0.0472186	0.427281	0.556406	0	0.00210083	0.971586	0.988017	0	83.9478	79.9648	82.7544	77.4684	76.5952	74.794	81.549	78.7985	77.5609	28.6511	27.2917	28.2438	26.4397	26.1417	25.527	27.8324	26.8937	26.4713
ENSG00000117410.14_4	protein_coding	ATP6V0B	-0.0264509	0.667049	0.761204	0	-0.0788036	0.209111	0.419531	0	92.6393	89.3607	97.921	89.6317	87.8082	95.636	89.8079	85.2163	83.5233	28.6012	27.589	30.2319	27.6727	27.1097	29.5264	27.727	26.3094	25.7868
ENSG00000117411.16_2	protein_coding	B4GALT2	0.0771061	0.26059	0.389374	0	0.134489	0.0572249	0.182529	0	98.628	105.704	92.2717	93.9854	93.3876	92.854	94.6593	99.7407	87.1504	26.1474	28.0232	24.4623	24.9166	24.7581	24.6167	25.0952	26.4424	23.1046
ENSG00000149823.9_6	protein_coding	VPS51	0.189316	0.0157092	0.0432468	0	0.00870705	0.904232	0.953966	0	105.942	94.8083	89.1671	96.7681	83.5288	86.1499	96.4496	85.554	87.0511	21.7094	19.4279	18.272	19.8295	17.1166	17.6537	19.7643	17.5316	17.8383
ENSG00000169288.18_4	protein_coding	MRPL1	-0.316228	0.00224876	0.00898444	0	-0.0106625	0.904321	0.953966	0	26.2867	30.4366	32.9287	26.9299	35.4808	36.6673	25.0654	31.0272	27.8742	16.1466	18.6957	20.2265	16.5417	21.7941	22.5229	15.3964	19.0585	17.1218
ENSG00000178028.14_4	protein_coding	DMAP1	0.162466	0.110195	0.202319	0	-0.0899193	0.369955	0.591943	0	45.3127	31.3362	36.2369	44.569	36.7809	36.2569	39.7349	40.7745	43.4758	8.093	5.59675	6.47202	7.96017	6.56918	6.47559	7.09679	7.28246	7.76493
ENSG00000117419.15_4	protein_coding	ERI3	0.00133663	0.986741	0.991551	0	0.163744	0.0512361	0.169255	0	28.2476	32.3358	28.8063	28.2315	31.2556	29.1879	27.3755	30.3034	25.7874	10.1428	11.6107	10.3434	10.137	11.2228	10.4804	9.82963	10.8809	9.25939
ENSG00000112144.15_2	protein_coding	ICK	-0.440426	3.1989e-05	0.000266532	0	-0.0095813	0.904291	0.953966	0	28.1416	39.4826	38.4762	28.052	36.9975	38.3091	29.2814	38.6513	39.1531	4.49618	6.30814	6.14734	4.48186	5.91109	6.12065	4.67829	6.17532	6.25549
ENSG00000126106.14_3	protein_coding	TMEM53	0.0597546	0.718041	0.800529	0	0.339096	0.0461925	0.157739	0	6.20069	6.1473	5.14034	5.52063	6.33779	5.01667	4.44708	7.18982	5.41585	1.74128	1.72628	1.44351	1.5503	1.77978	1.40878	1.24883	2.01905	1.52088
ENSG00000185022.12_6	protein_coding	MAFF	0.444309	0.00012879	0.000841742	0	0.272107	0.00889486	0.0490521	0	18.8141	16.2928	14.7085	18.6265	17.605	14.0467	18.5969	15.8755	12.4217	3.35307	2.90373	2.62137	3.31964	3.13758	2.50342	3.31436	2.82935	2.21381
ENSG00000142937.12_3	protein_coding	RPS8	0.135449	0.0265642	0.0657544	0	0.112134	0.0609302	0.190145	0	1014.63	1020.1	930.351	1005.29	1023.63	978.069	1065.57	992.243	900.472	364.845	366.811	334.538	361.486	368.081	351.697	383.159	356.794	323.794
ENSG00000178035.12_3	protein_coding	IMPDH2	-0.56526	4.06913e-09	1.29058e-07	0	0.00661727	0.903921	0.953966	0	307.385	465.445	448.279	304.847	453.125	480.004	321.287	468.931	452.844	110.849	167.849	161.658	109.934	163.406	173.099	115.863	169.106	163.305
ENSG00000258311.5_7	protein_coding	AC009779.3	0.762671	0.00341985	0.0127163	1	0.0299769	0.903602	0.953909	0	2.75586	1.89916	2.08667	3.94972	1.89592	1.4594	3.34975	2.26793	2.43465	0.785146	0.541073	0.594494	1.12528	0.540148	0.415782	0.954344	0.646134	0.693632
ENSG00000117425.14_3	protein_coding	PTCH2	0.579992	0.0226909	0.0580232	0	-0.0316568	0.899679	0.952551	0	3.44483	1.49934	1.98488	3.85995	2.32927	1.77864	2.36793	2.55745	2.78245	0.645824	0.281091	0.372119	0.723651	0.436684	0.333453	0.443931	0.479462	0.521645
ENSG00000116871.15_7	protein_coding	MAP7D1	-0.269248	0.000719779	0.00353304	0	-0.00810086	0.903457	0.953909	0	81.8279	102.155	98.9898	76.7951	95.0127	99.923	85.8229	95.5426	95.4481	15.5242	19.3806	18.7801	14.5694	18.0256	18.9571	16.2821	18.1261	18.1082
ENSG00000126107.15_3	protein_coding	HECTD3	-0.0738019	0.25577	0.383961	0	-0.132156	0.0500089	0.166209	0	48.7575	49.6282	49.4185	49.7306	45.8271	56.8708	50.1885	47.2888	50.0842	9.61308	9.78473	9.7434	9.80492	9.03531	11.2127	9.8952	9.32349	9.87464
ENSG00000085733.16_3	protein_coding	CTTN	0.460332	1.23853e-07	2.30029e-06	0	0.162245	0.00889539	0.0490521	0	318.62	246.292	233.707	330.25	268.95	233.002	327.236	278.666	242.769	45.8512	35.4427	33.6318	47.5249	38.7034	33.5302	47.0911	40.1016	34.9358
ENSG00000142677.4_3	protein_coding	IL22RA1	-0.563814	0.00663112	0.021611	0	-0.0216335	0.902484	0.953562	0	2.75586	4.14818	3.7153	2.87252	3.521	3.92212	2.13691	3.71554	3.92525	0.978297	1.47255	1.31888	1.01971	1.24991	1.39231	0.758576	1.31897	1.39341
ENSG00000132781.17_6	protein_coding	MUTYH	-0.0389645	0.700063	0.786948	0	0.0883898	0.382443	0.605412	0	32.8583	30.9364	31.5546	30.2513	35.21	28.1846	26.2782	31.7028	32.2963	8.40582	7.91414	8.07229	7.73888	9.00741	7.21017	6.72249	8.1102	8.26205
ENSG00000132773.12_3	protein_coding	TOE1	-0.088896	0.20757	0.329241	0	-0.015599	0.820177	0.911785	0	29.1485	30.0868	30.4349	26.6157	30.2806	30.4649	30.1477	29.8691	30.3089	12.3615	12.7594	12.9071	11.2874	12.8416	12.9198	12.7853	12.6671	12.8536
ENSG00000110958.16_3	protein_coding	PTGES3	-0.139335	0.0109188	0.0324016	0	-0.00619063	0.901199	0.952874	0	699.936	785.105	782.248	719.747	801.92	818.174	716.557	755.8	752.405	205.924	230.981	230.141	211.752	235.928	240.71	210.814	222.359	221.361
ENSG00000169131.13_4	protein_coding	ZNF354A	-0.25901	0.00259939	0.010111	0	-0.00920443	0.901119	0.952874	0	19.238	23.7396	23.4624	20.5116	24.4303	25.4482	21.6579	24.8025	24.4955	6.44706	7.95562	7.86272	6.87387	8.18709	8.52822	7.25799	8.31182	8.20896
ENSG00000132763.15_3	protein_coding	MMACHC	-0.121871	0.161189	0.271871	0	-0.157575	0.0752103	0.218734	0	24.3788	23.2898	27.1268	27.3787	27.1929	29.4159	25.8162	25.3333	27.9239	4.82844	4.61275	5.3727	5.42261	5.3858	5.82609	5.11312	5.01748	5.53058
ENSG00000117450.14_4	protein_coding	PRDX1	0.0330748	0.558436	0.673735	0	0.0975182	0.095485	0.255459	0	763.374	823.488	733.898	736.309	796.503	797.56	789.617	773.798	705.799	507.562	547.532	487.964	489.567	529.59	530.292	525.011	514.494	469.281
ENSG00000117448.13_5	protein_coding	AKR1A1	0.064634	0.382252	0.514194	0	0.0730729	0.324211	0.548672	0	94.6532	92.2594	90.1341	93.357	96.5294	94.0398	93.0999	93.9985	84.5667	30.3279	29.5609	28.8799	29.9125	30.929	30.1313	29.8302	30.1181	27.096
ENSG00000269737.2_6	transcribed_processed_pseudogene	AL691432.1	1.0277	0.0139947	0.0394911	1	0.054413	0.900364	0.952718	0	1.32493	0.599736	0.356261	1.0772	0.379184	0.410455	1.09733	0.772061	0.944047	0.728386	0.329707	0.195856	0.592192	0.208457	0.225649	0.603261	0.424443	0.518992
ENSG00000159588.15_4	protein_coding	CCDC17	0.481346	0.0836727	0.163151	0	-0.178481	0.539964	0.733938	0	1.37793	0.599736	0.865206	1.12208	0.975045	0.729698	1.03958	0.675554	0.944047	0.414665	0.18048	0.260369	0.337671	0.293423	0.21959	0.312843	0.203296	0.284095
ENSG00000159592.11_4	protein_coding	GPBP1L1	0.00660051	0.903917	0.936023	0	0.10915	0.0572468	0.182529	0	122.053	136.49	121.689	127.917	141.707	132.759	132.084	132.022	125.757	16.4204	18.3627	16.3714	17.2093	19.0645	17.8608	17.77	17.7617	16.9187
ENSG00000159596.7_3	protein_coding	TMEM69	-0.0887665	0.254067	0.382159	0	0.0479299	0.529303	0.726427	0	33.4413	34.8847	31.5037	31.4182	39.056	38.0811	34.9991	35.7561	36.3707	22.8268	23.8121	21.5042	21.4459	26.6594	25.9939	23.8902	24.4069	24.8264
ENSG00000175564.13_3	protein_coding	UCP3	0.812402	0.00334628	0.0125201	1	0.03404	0.898216	0.951704	0	2.43788	1.09952	1.32326	1.75044	1.13755	0.82091	2.0214	1.35111	1.39123	0.730341	0.329394	0.396422	0.524399	0.340789	0.245929	0.605572	0.404765	0.416785
ENSG00000230896.1_7	lncRNA	AL604028.1	-0.305001	0.273235	0.402927	0	0.0610966	0.815112	0.910151	0	0.847957	1.54932	1.37415	1.0772	1.30006	1.32258	1.09733	1.06158	1.04342	1.41799	2.59083	2.29791	1.80133	2.17401	2.21167	1.835	1.77522	1.74485
ENSG00000086015.21_3	protein_coding	MAST2	-0.0615504	0.344971	0.477992	0	0.0458246	0.478201	0.687	0	107.002	115.499	109.372	98.743	100.863	99.4669	94.1972	106.737	104.292	13.5858	14.6647	13.8868	12.5372	12.8064	12.6291	11.96	13.5522	13.2418
ENSG00000171105.14_4	protein_coding	INSR	-0.211162	0.00937966	0.0286761	0	-0.212875	0.00884899	0.0488336	0	44.5178	50.1779	58.5795	48.5187	46.3688	51.0332	49.7842	46.0824	55.7981	4.11022	4.63281	5.40851	4.47962	4.28112	4.71177	4.59645	4.25468	5.15171
ENSG00000159337.6_2	protein_coding	PLA2G4D	1.93657	1.70617e-05	0.000154659	1	0.0570197	0.89822	0.951704	0	1.11294	0.199912	0.254472	1.21185	0.325015	0.228031	1.27059	0.434284	0.44718	0.21661	0.0389085	0.0495275	0.235859	0.0632571	0.0443812	0.247294	0.084524	0.0870339
ENSG00000085998.14_3	protein_coding	POMGNT1	-0.0530231	0.398594	0.529174	0	0.0486733	0.436301	0.651474	0	102.709	106.403	101.738	95.6012	103.68	101.018	94.255	103.842	100.765	16.5954	17.1923	16.4385	15.447	16.7523	16.3221	15.2294	16.7785	16.2812
ENSG00000284770.2_3	protein_coding	TBCE	0.765556	0.00243458	0.00957055	1	0.0304644	0.897568	0.951413	0	3.70981	1.64927	2.29025	3.94972	2.16677	1.505	3.17649	2.70221	2.63339	0.298169	0.132557	0.184074	0.317451	0.174149	0.120961	0.255303	0.217185	0.211654
ENSG00000142784.16_3	protein_coding	WDTC1	-0.546923	4.53418e-08	9.89905e-07	0	-0.00781885	0.897615	0.951413	0	36.1442	53.5764	53.032	35.6372	51.1899	55.0466	35.6921	51.3903	48.8917	6.11473	9.06385	8.97175	6.02897	8.6601	9.31256	6.03826	8.69402	8.27131
ENSG00000070785.16_5	protein_coding	EIF2B3	-0.551112	9.38624e-06	9.3147e-05	0	-0.259914	0.0088369	0.0487855	0	10.1755	11.9947	14.7594	10.1436	12.9464	15.9165	11.3776	13.7523	15.6513	2.98314	3.51648	4.327	2.97379	3.79549	4.66624	3.33556	4.03176	4.58848
ENSG00000173660.12_3	protein_coding	UQCRH	-0.0224795	0.671611	0.764838	0	0.0572698	0.285787	0.508017	0	150.3	157.781	147.441	148.249	161.153	156.703	147.793	152.82	149.159	112.081	117.659	109.949	110.551	120.174	116.855	110.211	113.96	111.23
ENSG00000117481.10_3	protein_coding	NSUN4	-0.118456	0.0701968	0.14229	0	0.130587	0.0457101	0.156796	0	42.5039	51.8272	49.5203	45.5564	53.6816	48.3425	45.6836	53.4652	47.3514	5.01935	6.12036	5.84794	5.37983	6.33935	5.70884	5.39486	6.3138	5.59181
ENSG00000117480.16_3	protein_coding	FAAH	0.0926421	0.362809	0.495476	0	0.148464	0.149978	0.340624	0	20.457	19.3915	17.7113	21.499	20.0968	18.7441	15.5937	20.6044	17.7381	7.5099	7.11875	6.50194	7.89245	7.37766	6.8811	5.72454	7.56402	6.5118
ENSG00000117593.12_5	protein_coding	DARS2	-0.296193	0.000215375	0.00129288	0	0.00840364	0.896528	0.95054	0	57.1311	75.3169	69.5727	57.63	71.1783	76.4814	60.9308	70.4023	69.5117	7.76977	10.243	9.46182	7.83762	9.68017	10.4014	8.28652	9.57464	9.45351
ENSG00000079277.21_7	protein_coding	MKNK1	0.148194	0.0829065	0.16215	0	0.017365	0.833118	0.918248	0	31.9574	27.9377	26.1598	32.5403	28.7638	28.0478	32.1691	31.558	33.0416	3.96002	3.46192	3.24161	4.03226	3.56429	3.47556	3.98626	3.91053	4.09438
ENSG00000112282.18_4	protein_coding	MED23	0.29386	0.00480588	0.0167484	0	-0.0122497	0.89629	0.950427	0	53.1563	43.5808	43.0058	53.3212	41.8728	43.3258	53.0184	43.525	43.774	7.15814	5.86868	5.79125	7.18034	5.63867	5.83434	7.13957	5.86116	5.89469
ENSG00000003509.16_4	protein_coding	NDUFAF7	0.296682	0.00693046	0.0223819	0	-0.013206	0.895772	0.950059	0	22.2589	17.7922	17.7113	24.1472	16.0882	17.2847	21.2536	20.7009	20.2225	6.09665	4.87323	4.85108	6.61385	4.40653	4.73424	5.8213	5.66992	5.53889
ENSG00000152503.9_4	protein_coding	TRIM36	-0.529372	0.000247739	0.00145035	0	-0.0149068	0.895645	0.950059	0	11.2884	16.2429	17.1005	10.8168	16.9549	16.6918	11.1466	14.3314	14.1607	1.84663	2.6571	2.79741	1.76948	2.77359	2.73055	1.82342	2.34441	2.31649
ENSG00000123473.15_3	protein_coding	STIL	-0.0926912	0.205652	0.327171	0	-0.129875	0.0822669	0.231602	0	114.05	116.649	120.416	113.779	107.147	126.283	120.36	115.375	124.465	15.6426	15.999	16.5157	15.6054	14.6957	17.3204	16.508	15.8243	17.0711
ENSG00000177054.14_3	protein_coding	ZDHHC13	-0.309321	0.000122332	0.000805373	0	-0.185278	0.00881391	0.0486772	0	30.5795	31.4861	37.9164	27.5583	32.2848	35.664	30.9563	33.1504	36.6688	3.94116	4.05802	4.88676	3.55178	4.16095	4.59647	3.98973	4.27251	4.72597
ENSG00000237424.1_5	lncRNA	FOXD2-AS1	-0.16078	0.402786	0.532827	0	-0.071227	0.705364	0.846989	0	3.12684	3.79833	3.86798	3.23159	2.76263	4.10455	3.98505	4.34284	3.52775	1.24625	1.51388	1.54164	1.288	1.10109	1.63593	1.5883	1.73091	1.40604
ENSG00000186564.5_2	protein_coding	FOXD2	-0.0319686	0.831508	0.884984	0	0.0864939	0.561117	0.749455	0	5.29973	5.29767	5.29303	4.39855	4.17103	4.515	4.56259	5.93522	4.76992	1.13363	1.13319	1.1322	0.940867	0.892198	0.965776	0.975955	1.26957	1.0203
ENSG00000132122.12_6	protein_coding	SPATA6	-0.307345	0.0522683	0.112866	0	0.0784989	0.588094	0.767199	0	3.55082	4.548	4.27514	3.41112	5.03773	4.01334	3.29199	3.86031	4.42211	0.597983	0.765914	0.719962	0.574456	0.848389	0.675874	0.554394	0.650102	0.744715
ENSG00000185104.20_4	protein_coding	FAF1	-0.0920689	0.300813	0.432632	0	0.0741478	0.396884	0.618112	0	23.4248	25.8886	24.2258	24.0574	27.2471	27.3181	22.6974	25.7193	23.2534	3.10304	3.42941	3.20914	3.18683	3.60936	3.61876	3.00668	3.40698	3.08032
ENSG00000091527.15_3	protein_coding	CDV3	-0.135197	0.0119963	0.034924	0	-0.00647805	0.895037	0.949866	0	277.017	310.164	299.107	278.859	302.101	323.393	280.513	302.165	295.984	63.4342	71.0244	68.4925	63.856	69.1782	74.0538	64.2346	69.1929	67.7773
ENSG00000109063.15_3	protein_coding	MYH3	0.735666	8.6452e-05	0.000604159	1	-0.0211742	0.894253	0.949203	0	8.0026	3.84831	5.14034	7.58526	4.44187	3.42046	6.81501	4.97014	4.96867	1.19728	0.575749	0.769052	1.13484	0.664553	0.511738	1.0196	0.743588	0.743367
ENSG00000005206.17_3	protein_coding	SPPL2B	0.377607	0.00392841	0.0142082	0	-0.015752	0.893691	0.94919	0	56.9721	34.6348	43.9728	56.7772	42.4686	35.0255	48.9756	46.9027	46.5564	7.68026	4.66902	5.92785	7.65398	5.72508	4.72169	6.60227	6.32283	6.27614
ENSG00000119943.13_4	protein_coding	PYROXD2	0.469707	0.00148349	0.00642506	0	0.0177678	0.893255	0.948882	0	8.16159	5.29767	5.5475	7.58526	5.47108	4.87985	7.39255	6.12824	6.31021	2.11167	1.37068	1.43532	1.96255	1.41555	1.26258	1.91269	1.58557	1.63265
ENSG00000117859.19_6	protein_coding	OSBPL9	-0.154564	0.0313796	0.0753727	0	0.0884692	0.195116	0.399904	0	64.6037	83.2634	74.1532	72.4415	85.5331	83.6872	75.8891	83.1896	79.0515	6.28869	8.10507	7.21827	7.05164	8.32601	8.14633	7.38724	8.09789	7.69508
ENSG00000140326.13_6	protein_coding	CDAN1	-0.213193	0.0130775	0.0374151	0	-0.0104294	0.893168	0.94886	0	29.6255	31.5361	32.9796	26.6606	31.2556	29.9176	25.8162	31.7028	32.346	5.43787	5.78857	6.05353	4.89365	5.73708	5.49148	4.73865	5.81916	5.93723
ENSG00000246596.7_5	transcribed_unprocessed_pseudogene	AC139795.1	0.971368	0.0130212	0.037291	1	0.0541335	0.892501	0.94864	0	1.27194	0.74967	0.356261	1.39138	0.379184	0.638485	1.55937	1.06158	1.14279	0.570375	0.336175	0.159758	0.623937	0.170038	0.286316	0.699267	0.476047	0.512464
ENSG00000197301.7_7	lncRNA	HMGA2-AS1	-0.735987	0.0241564	0.0609962	0	-0.891299	0.00880104	0.0486255	-1	0.953952	1.19947	3.05367	1.61579	1.46257	1.36818	1.96365	1.39936	3.17995	0.158122	0.198819	0.506161	0.267826	0.242428	0.226783	0.325484	0.231951	0.527092
ENSG00000198841.3_3	protein_coding	KTI12	-0.197619	0.109634	0.201417	0	-0.203716	0.0995043	0.261726	0	5.40573	5.79745	6.51449	6.64271	6.5003	6.88652	5.71767	5.50094	7.05551	3.15387	3.38241	3.80075	3.87556	3.79247	4.01781	3.33587	3.20941	4.1164
ENSG00000110046.13_3	protein_coding	ATG2A	0.20502	0.0139243	0.0393155	0	-0.225739	0.00880118	0.0486255	0	42.1859	28.5874	32.7251	35.5026	28.818	30.8753	37.7135	28.132	36.47	5.38566	3.64961	4.17786	4.53244	3.67905	3.9417	4.8147	3.59147	4.65595
ENSG00000157077.14_3	protein_coding	ZFYVE9	-0.106794	0.225732	0.350574	0	0.0821215	0.342616	0.566876	0	34.9252	38.683	34.4556	34.6049	41.1686	41.4103	33.6707	37.8793	35.1782	6.01226	6.65915	5.93141	5.95712	7.08703	7.12865	5.79631	6.52079	6.05581
ENSG00000266094.7_3	protein_coding	RASSF5	-0.472149	0.00258571	0.0100605	0	-0.0180757	0.890913	0.947999	0	6.20069	9.34589	8.2449	7.00178	7.63785	10.8543	6.17971	9.60251	7.80081	0.890264	1.34184	1.18376	1.00528	1.0966	1.5584	0.887252	1.37868	1.12
ENSG00000144369.13_3	protein_coding	FAM171B	-0.476362	5.58525e-05	0.000422571	0	-0.264251	0.00878569	0.0485771	0	23.0008	26.9382	33.2341	24.3716	28.2221	33.7485	23.8525	27.4082	32.1473	4.01341	4.70043	5.799	4.25259	4.92447	5.88877	4.16202	4.78244	5.60937
ENSG00000186010.19_4	protein_coding	NDUFA13	0.353753	0.00322781	0.0121461	0	0.0150452	0.889858	0.947156	0	12.3484	10.5454	10.3316	13.2405	8.55873	8.66516	12.0129	10.6158	10.5336	4.55996	3.89415	3.81521	4.88942	3.16053	3.19984	4.43607	3.92018	3.8898
ENSG00000134744.14_6	protein_coding	TUT4	-0.0571878	0.41549	0.5457	0	-0.119459	0.0988684	0.260978	0	77.5881	76.0665	80.9731	78.5007	73.8326	78.4425	79.8742	76.048	86.107	4.78968	4.69576	4.99865	4.84602	4.55785	4.84243	4.93081	4.69461	5.31558
ENSG00000162377.6_3	protein_coding	COA7	-0.127729	0.0299001	0.0724339	0	-0.0641789	0.250886	0.468314	0	92.1624	95.1581	103.621	92.2349	100.538	104.028	98.8176	100.175	101.659	22.2185	22.9407	24.981	22.236	24.2377	25.079	23.8229	24.1502	24.5079
ENSG00000162378.13_3	protein_coding	ZYG11B	-0.022795	0.803366	0.863953	0	0.0870495	0.344828	0.569143	0	49.6055	57.3248	53.1338	54.9819	58.5569	54.4081	58.4473	59.9795	58.034	6.04503	6.98572	6.475	6.70021	7.13586	6.63028	7.12251	7.30923	7.07215
ENSG00000121310.17_4	protein_coding	ECHDC2	-0.0474843	0.706685	0.791845	0	-0.0418927	0.739302	0.86803	0	18.3901	13.7939	16.4898	16.3824	17.28	14.2747	13.861	17.8539	19.6759	1.58919	1.19201	1.42497	1.41569	1.49326	1.23356	1.19781	1.54285	1.7003
ENSG00000153790.12_4	protein_coding	C7orf31	-1.14449	0.00150569	0.00651338	-1	0.0373378	0.889713	0.947072	0	1.00695	2.19903	1.62862	0.448832	1.84175	2.09788	1.15509	1.73714	1.88809	0.26209	0.572367	0.4239	0.116822	0.479373	0.546039	0.300647	0.452144	0.491435
ENSG00000157184.7_4	protein_coding	CPT2	-0.0965601	0.213045	0.335822	0	-0.155962	0.051841	0.170569	0	21.3049	21.5905	22.0373	20.9156	20.9635	25.0834	23.3905	20.3149	22.8559	2.1117	2.14	2.18429	2.07311	2.07785	2.48621	2.31841	2.01357	2.26543
ENSG00000162384.14_3	protein_coding	CZIB	-0.0519294	0.449347	0.577378	0	0.0761027	0.267564	0.486666	0	25.7567	27.9377	26.8723	25.4936	26.6512	26.6796	25.1809	28.904	25.688	5.71863	6.20287	5.96631	5.66022	5.91723	5.92353	5.59078	6.41742	5.70338
ENSG00000162385.11_3	protein_coding	MAGOH	0.0295754	0.690412	0.779543	0	0.0734715	0.326477	0.551169	0	46.9556	52.8767	51.7088	48.9676	52.3274	50.5316	53.1339	48.3986	43.6746	34.4502	38.7944	37.9375	35.9263	38.3913	37.0738	38.9831	35.5089	32.043
ENSG00000157193.17_6	protein_coding	LRP8	0.107036	0.237853	0.363994	0	0.21204	0.0258261	0.106	0	79.072	73.5676	70.3871	84.919	88.1332	68.5916	70.8067	91.1515	79.3496	4.0187	3.73895	3.57731	4.31587	4.47922	3.48605	3.59864	4.63262	4.03281
ENSG00000058804.12_3	protein_coding	NDC1	0.0251732	0.625235	0.728582	0	-0.130738	0.0188777	0.0848671	0	176.375	164.328	171.463	185.592	167.979	181.284	184.525	158.273	184.288	37.3676	34.8152	36.327	39.3203	35.5887	38.4077	39.0943	33.5323	39.044
ENSG00000058799.15_3	protein_coding	YIPF1	-0.0801575	0.346478	0.479618	0	-0.0663625	0.432537	0.648374	0	17.4891	18.092	17.355	15.35	15.9799	18.1512	17.0375	16.165	17.0922	8.58994	8.88607	8.52407	7.53932	7.84867	8.91514	8.36813	7.9396	8.395
ENSG00000183291.17_8	protein_coding	SELENOF	0.0938132	0.119391	0.215852	0	0.168252	0.00873271	0.0483027	0	134.984	141.688	124.59	140.17	151.836	138.369	135.261	138.778	121.583	61.3286	64.3742	56.6059	63.6848	68.9851	62.8664	61.4541	63.0523	55.24
ENSG00000116212.15_4	protein_coding	LRRC42	-0.1242	0.0371922	0.0864007	0	0.111301	0.0574244	0.182699	0	83.0468	101.455	89.4216	83.3032	97.7753	98.7372	87.7288	99.7889	88.5914	38.3765	46.8833	41.3224	38.495	45.1827	45.6272	40.5401	46.1132	40.9387
ENSG00000196873.15_4	protein_coding	CBWD3	-0.441459	0.0899268	0.172778	0	-0.750429	0.0087153	0.0482249	-1	1.37793	1.09952	1.8322	1.39138	1.08338	1.32258	1.03958	0.916823	2.08684	0.111854	0.0892537	0.14873	0.112946	0.0879441	0.107361	0.0843881	0.0744235	0.1694
ENSG00000116205.14_5	protein_coding	TCEANC2	-0.0614572	0.524687	0.645889	0	-0.0748677	0.439169	0.653905	0	13.6733	11.8448	15.5228	13.1059	14.734	13.5906	14.092	13.8971	13.5148	1.12371	0.973438	1.27571	1.07708	1.21088	1.11691	1.15812	1.1421	1.11068
ENSG00000215883.10_4	protein_coding	CYB5RL	-0.0748108	0.459515	0.586817	0	-0.132744	0.197576	0.403614	0	12.0834	11.1951	14.2505	12.7019	12.7298	11.7664	12.5327	11.9669	13.3657	1.35373	1.25421	1.59651	1.42303	1.42614	1.31821	1.40406	1.34068	1.49739
ENSG00000214413.8_4	protein_coding	BBIP1	-0.284245	0.00300278	0.0114155	0	-0.0115137	0.889075	0.946601	0	13.7263	16.5927	17.4568	15.0807	16.6841	16.9199	12.5327	16.8406	16.1482	1.62557	1.96503	2.06736	1.78597	1.97585	2.00377	1.48421	1.99438	1.91238
ENSG00000109046.15_3	protein_coding	WSB1	0.183395	0.0100644	0.0303213	0	-0.00908922	0.889001	0.946593	0	79.178	69.7693	68.4531	80.0716	70.9074	68.9564	80.4517	69.0995	73.6854	9.20461	8.11082	7.95781	9.30849	8.24313	8.01633	9.35268	8.03296	8.56607
ENSG00000136813.14_7	protein_coding	ECPAS	0.146461	0.0114599	0.0336887	0	-0.00743856	0.888264	0.946231	0	190.896	179.521	178.029	205.969	177.621	173.85	204.046	182.979	191.095	22.594	21.2476	21.071	24.3779	21.0227	20.5765	24.1503	21.6568	22.6175
ENSG00000243725.7_4	protein_coding	TTC4	0.0102169	0.93011	0.953304	0	-0.091871	0.437055	0.652103	0	7.79061	7.34677	7.07433	6.59783	5.68776	7.11455	7.10378	6.9003	7.1052	2.23355	2.1063	2.02819	1.89158	1.63067	2.03972	2.03663	1.9783	2.03704
ENSG00000167925.16_5	protein_coding	GHDC	-0.242728	0.00993229	0.0300237	0	-0.0117952	0.888336	0.946231	0	13.1433	16.2429	17.0496	13.9138	15.7632	17.1935	14.0343	16.2133	14.3595	3.2703	4.04152	4.24226	3.462	3.92218	4.27805	3.49199	4.03416	3.57289
ENSG00000162490.7_3	protein_coding	DRAXIN	0.486341	0.0326236	0.0776758	0	0.609654	0.00871253	0.0482249	1	4.39878	5.64752	3.46082	4.08437	3.84601	2.50834	3.58077	3.66729	2.68308	0.597254	0.766805	0.469901	0.554565	0.522201	0.340575	0.486187	0.497935	0.364302
ENSG00000102349.18_4	protein_coding	KLF8	-1.16891	0.00867196	0.0269013	-1	-0.0490779	0.888273	0.946231	0	0.635968	0.849626	1.42505	0.942547	1.35423	1.23136	0.173263	1.78539	1.4906	0.0499621	0.0667473	0.111953	0.0740472	0.106389	0.096737	0.0136117	0.140262	0.117103
ENSG00000144040.12_3	protein_coding	SFXN5	0.288546	0.00785875	0.0247998	0	-0.014062	0.888399	0.946231	0	13.9913	9.84567	12.4183	13.9587	12.0797	10.2158	13.5723	11.7739	11.4279	1.26196	0.888037	1.12007	1.25901	1.08954	0.921419	1.22416	1.06196	1.03075
ENSG00000162402.14_3	protein_coding	USP24	-0.105402	0.212232	0.335017	0	-0.0535684	0.518823	0.718576	0	128.89	142.537	158.231	146.229	145.173	130.981	146.349	149.201	164.413	10.7202	11.8554	13.1607	12.1625	12.0746	10.8942	12.1724	12.4096	13.6749
ENSG00000146700.9_3	protein_coding	SSC4D	1.42784	2.39e-06	2.8862e-05	1	-0.0347543	0.888291	0.946231	0	4.76976	1.69925	2.44293	4.84738	1.67924	1.64182	5.65992	2.12317	1.58997	1.6908	0.602358	0.865982	1.71832	0.595265	0.581999	2.00635	0.75263	0.563621
ENSG00000169251.12_5	protein_coding	NMD3	-0.181533	0.010153	0.0305499	0	0.00904788	0.887523	0.946136	0	119.191	135.34	133.903	122.621	147.069	148.174	125.442	136.751	134.303	24.4796	27.7964	27.5012	25.184	30.2052	30.4322	25.7635	28.0861	27.5833
ENSG00000162600.12_4	protein_coding	OMA1	-0.148958	0.0806545	0.158681	0	-0.0920239	0.265465	0.484376	0	19.821	19.4914	20.3069	19.0754	19.9884	22.9399	18.4236	20.1701	20.2722	5.33109	5.24245	5.46178	5.13054	5.37612	6.16995	4.95525	5.42499	5.45244
ENSG00000168758.11_4	protein_coding	SEMA4C	0.308169	0.000108993	0.000730285	0	-0.00922219	0.886352	0.945575	0	54.8522	41.032	41.6317	50.9424	40.0852	40.9087	47.0697	41.5948	40.9915	8.75674	6.55044	6.64618	8.13257	6.39929	6.53076	7.51433	6.64029	6.54398
ENSG00000162601.11_4	protein_coding	MYSM1	-0.0425271	0.722477	0.803922	0	-0.0147476	0.901682	0.952994	0	65.1337	61.9228	73.5425	75.314	81.6329	65.0343	71.7886	73.0563	80.244	4.96635	4.72152	5.60751	5.74258	6.22439	4.95877	5.47378	5.57044	6.11849
ENSG00000275549.1_6	lncRNA	STPG3-AS1	1.35947	0.000486232	0.00255824	1	0.0595689	0.885691	0.945278	0	1.11294	0.399824	0.305367	1.0772	0.325015	0.501667	0.80856	0.482538	0.347807	0.654288	0.235052	0.179522	0.633272	0.191073	0.294925	0.475344	0.283679	0.204472
ENSG00000183696.14_4	protein_coding	UPP1	0.645272	1.05364e-07	2.02746e-06	1	-0.0115254	0.885182	0.945106	0	69.9035	42.0315	44.8889	62.2979	38.3518	38.902	59.2559	41.0158	38.7059	15.2628	9.17719	9.80108	13.6022	8.37375	8.49389	12.938	8.9554	8.45108
ENSG00000279672.1_6	TEC	AP006621.5	0.637674	0.0181961	0.0486814	1	0.0385324	0.884459	0.944854	0	2.43788	1.29943	1.93399	3.00717	1.46257	1.36818	2.07915	2.21968	1.58997	2.14037	1.14085	1.69797	2.64019	1.28408	1.20121	1.82542	1.94879	1.39594
ENSG00000135521.9_4	protein_coding	LTV1	-0.274993	0.000198834	0.00121203	0	-0.173712	0.00867649	0.048047	0	69.3205	72.2682	80.9731	66.472	77.0285	89.388	74.8495	76.4823	84.2189	37.4099	39.0007	43.6984	35.8726	41.5696	48.2396	40.3937	41.2749	45.45
ENSG00000104863.12_3	protein_coding	LIN7B	0.636099	0.00101227	0.00468358	1	-0.0257053	0.883814	0.944854	0	4.08079	2.9487	3.46082	5.0718	2.76263	2.41712	4.85136	3.1365	3.17995	2.32789	1.68209	1.97423	2.89321	1.57594	1.37885	2.76746	1.78922	1.814
ENSG00000102393.10_3	protein_coding	GLA	0.469768	1.30471e-06	1.70055e-05	0	-0.0100549	0.884376	0.944854	0	48.6516	34.2849	31.8599	44.8383	33.5307	36.3937	45.1638	31.6063	31.7498	21.3853	15.0703	14.0044	19.7091	14.7388	15.9972	19.8522	13.8929	13.956
ENSG00000162604.12_6	protein_coding	TM2D1	-0.0687779	0.510188	0.632954	0	-0.0644601	0.535932	0.730344	0	11.6064	10.4954	9.92442	11.4003	11.9172	12.7241	10.6845	11.4362	12.6701	2.10414	1.90272	1.79921	2.06677	2.16048	2.30676	1.93701	2.07327	2.29697
ENSG00000132849.20_5	protein_coding	PATJ	-0.0228518	0.768687	0.838626	0	0.106401	0.178264	0.379379	0	40.543	46.1797	42.1406	39.5421	42.4686	39.7229	40.6013	43.2837	40.7431	3.3814	3.85152	3.51465	3.29792	3.542	3.313	3.38626	3.60998	3.39809
ENSG00000162607.13_4	protein_coding	USP1	-0.11132	0.133146	0.234373	0	-0.0838531	0.251063	0.468523	0	108.539	113.75	119.246	116.337	129.356	131.072	126.713	115.23	129.285	28.0534	29.4004	30.8208	30.0691	33.4339	33.8775	32.7508	29.7829	33.4155
ENSG00000100600.15_4	protein_coding	LGMN	0.581737	7.80701e-08	1.56476e-06	0	0.0102874	0.883712	0.944854	0	59.993	38.8829	37.0003	55.0268	41.3852	40.635	57.35	35.7561	37.4141	15.4781	10.0317	9.546	14.1968	10.6773	10.4838	14.7962	9.225	9.65275
ENSG00000121281.12_5	protein_coding	ADCY7	-0.488229	2.83934e-05	0.000239897	0	-0.0127289	0.883117	0.944653	0	17.3301	24.0894	23.5132	15.9784	20.6926	21.3437	15.0739	22.4863	23.1043	2.00813	2.79136	2.72459	1.8515	2.39775	2.47319	1.74668	2.60559	2.67721
ENSG00000280832.1_6	lncRNA	GSEC	0.739057	0.00115682	0.00522667	1	0.0308484	0.882813	0.944463	0	2.96785	1.89916	1.47594	2.96229	1.4084	1.86985	3.00322	2.12317	1.98747	0.797166	0.510117	0.396438	0.795673	0.378297	0.502243	0.806667	0.570284	0.533835
ENSG00000088035.18_5	protein_coding	ALG6	-0.00238338	0.974953	0.983266	0	-0.138028	0.0836551	0.234367	0	19.821	17.7422	18.2711	19.2549	16.6841	18.5617	18.0771	17.6126	20.4709	3.61236	3.2335	3.32989	3.50918	3.04066	3.38285	3.29453	3.20989	3.7308
ENSG00000142856.16_2	protein_coding	ITGB3BP	-0.0782192	0.381715	0.513711	0	0.135482	0.131764	0.313465	0	18.2311	18.4919	17.1514	17.9084	21.5052	20.8876	17.5573	22.2933	18.5828	3.33964	3.38741	3.14186	3.28053	3.93939	3.82627	3.21621	4.08376	3.40407
ENSG00000137266.14_3	protein_coding	SLC22A23	-0.266972	0.00600734	0.0199935	0	0.012667	0.88214	0.944077	0	20.51	24.3893	21.3248	17.6391	21.3426	21.7085	17.7883	22.1003	24.2471	2.30501	2.74098	2.39658	1.98237	2.39859	2.43971	1.99914	2.48373	2.72501
ENSG00000079739.17_5	protein_coding	PGM1	0.0843033	0.150379	0.257794	0	-0.0977528	0.100106	0.262612	0	71.0694	63.9719	68.7584	71.8131	67.0072	70.4614	74.3298	60.5103	65.5864	17.4318	15.6909	16.865	17.6142	16.4354	17.2827	18.2315	14.8419	16.0869
ENSG00000116133.13_4	protein_coding	DHCR24	-0.767784	8.58187e-12	5.70714e-10	-1	0.00764584	0.881145	0.943799	0	392.657	687.598	665.7	376.166	659.943	689.975	400.468	653.791	635.045	63.1891	110.653	107.129	60.5352	106.203	111.036	64.4461	105.213	102.196
ENSG00000138448.12_4	protein_coding	ITGAV	-0.268778	0.0167352	0.04555	0	-0.0153929	0.880911	0.943707	0	76.2102	98.7566	98.5317	85.5025	96.4753	96.913	85.0721	98.9686	101.957	9.27131	12.0142	11.9868	10.4018	11.7367	11.7899	10.3494	12.04	12.4035
ENSG00000115750.17_4	protein_coding	TAF1B	-0.267254	0.0116259	0.0340794	0	-0.0142478	0.880948	0.943707	0	25.9687	30.6365	30.4858	25.3141	30.9848	32.2891	25.5274	29.9174	29.6133	6.533	7.7073	7.66938	6.36833	7.79491	8.12305	6.42199	7.52638	7.44988
ENSG00000162434.12_3	protein_coding	JAK1	-0.123782	0.0326523	0.0777181	0	-0.0178592	0.741875	0.869542	0	106.207	122.696	119.704	114.093	118.035	117.846	113.718	118.753	126.453	16.6939	19.2858	18.8154	17.9335	18.5531	18.5234	17.8746	18.6659	19.8762
ENSG00000165416.14_3	protein_coding	SUGT1	-0.227216	0.000307196	0.00174396	0	-0.00775782	0.880637	0.943535	0	106.79	118.748	122.808	100.179	124.589	117.573	100.55	114.748	119.596	7.07122	7.86305	8.13193	6.63351	8.24984	7.78523	6.65807	7.59817	7.91921
ENSG00000116350.17_6	protein_coding	SRSF4	0.172735	0.00689376	0.0222908	0	0.00871424	0.879988	0.943213	0	128.996	120.847	116.497	130.206	111.263	112.1	126.424	112.094	113.584	14.6486	13.7232	13.2293	14.7861	12.635	12.7299	14.3566	12.7292	12.8985
ENSG00000138785.15_7	protein_coding	INTS12	-0.306652	0.000784134	0.00378456	0	-0.222577	0.00866414	0.047997	0	18.6021	20.6909	22.0882	18.447	19.3926	25.6762	20.5605	20.8457	23.3031	4.77343	5.30944	5.668	4.73364	4.97628	6.58872	5.27599	5.34915	5.97974
ENSG00000280303.2_5	lncRNA	ERICD	0.191775	0.566569	0.680552	0	0.87899	0.00865751	0.0479787	1	0.635968	1.29943	0.508945	0.673248	0.704199	0.592879	0.693051	1.20635	0.645927	0.317508	0.648741	0.254091	0.33612	0.351572	0.295996	0.346007	0.602269	0.32248
ENSG00000090661.12_4	protein_coding	CERS4	-0.30724	0.0129662	0.0371535	0	0.0167769	0.879258	0.942897	0	14.2563	19.4414	20.7141	16.1579	19.0675	18.288	15.7669	19.3498	18.235	3.51226	4.78971	5.10324	3.98077	4.6976	4.50556	3.88443	4.76713	4.49249
ENSG00000152763.17_5	protein_coding	WDR78	-0.186795	0.272126	0.401867	0	-0.227641	0.184769	0.387608	0	2.80886	2.9487	3.40993	2.46858	2.70846	2.69076	3.11873	2.46095	3.42838	0.420929	0.441886	0.511004	0.369935	0.405883	0.403231	0.467366	0.368791	0.513769
ENSG00000198160.14_3	protein_coding	MIER1	-0.154391	0.0629697	0.130509	0	0.0887432	0.264278	0.482881	0	37.9461	47.1293	43.9728	40.8886	46.9647	45.4693	40.0815	46.7097	42.9293	4.58674	5.69676	5.31522	4.94241	5.67686	5.49611	4.84485	5.64604	5.18908
ENSG00000159128.14_3	protein_coding	IFNGR2	-0.422935	1.17685e-05	0.000113296	0	-0.0107658	0.879065	0.942772	0	36.8861	53.3265	48.5024	38.5547	49.0231	57.3269	39.0996	50.0392	47.5998	12.4615	18.0157	16.386	13.0252	16.5619	19.3672	13.2093	16.9051	16.081
ENSG00000142864.14_4	protein_coding	SERBP1	-0.0355841	0.488787	0.612937	0	-0.0453664	0.379413	0.602145	0	575.339	566.151	566.863	556.192	586.11	609.07	587.939	555.546	586.353	74.953	73.756	73.8487	72.4586	76.3562	79.3473	76.5944	72.3745	76.3878
ENSG00000198791.12_3	protein_coding	CNOT7	-0.233643	0.000639175	0.00321056	0	0.00883021	0.877847	0.942151	0	151.572	191.616	183.627	167.908	197.013	200.621	166.217	186.067	186.822	13.8536	17.5135	16.7834	15.3467	18.0069	18.3366	15.1921	17.0064	17.0754
ENSG00000172380.6_3	protein_coding	GNG12	0.0704865	0.27697	0.406484	0	0.15037	0.0275188	0.110835	0	128.201	147.985	132.173	142.414	149.561	134.492	140.863	137.475	125.21	27.1899	31.386	28.0324	30.2045	31.7203	28.5244	29.8754	29.157	26.5558
ENSG00000162368.13_2	protein_coding	CMPK1	0.0547473	0.331006	0.463718	0	0.160691	0.00864944	0.0479524	0	111.453	111.201	104.894	107.046	126.485	109.135	110.484	116.388	102.603	28.9941	28.9285	27.2876	27.8477	32.9045	28.3911	28.7419	30.2779	26.6917
ENSG00000126003.7_3	protein_coding	PLAGL2	-0.323915	1.01625e-05	9.94945e-05	0	0.00828111	0.877954	0.942151	0	53.3683	66.2708	67.537	54.8024	67.0614	65.4904	51.4591	67.7484	66.928	9.4357	11.7169	11.9408	9.68924	11.8567	11.5789	9.09814	11.9781	11.8331
ENSG00000140105.18_5	protein_coding	WARS	-0.325723	8.25956e-06	8.3586e-05	0	0.00824992	0.877947	0.942151	0	151.996	196.164	198.132	144.479	192.355	190.953	158.593	184.909	181.058	23.9138	30.8628	31.1725	22.7311	30.2635	30.0429	24.9517	29.092	28.4862
ENSG00000253251.2_6	protein_coding	SHLD3	0.587185	0.00407144	0.0146631	1	0.528033	0.00862602	0.0478545	0	3.9218	3.74835	2.59562	3.63554	3.30432	2.69076	3.46526	3.52253	2.03715	1.99684	1.90853	1.3216	1.85109	1.68244	1.37004	1.76439	1.79355	1.03725
ENSG00000066557.6_3	protein_coding	LRRC40	0.169799	0.0748814	0.149669	0	0.240101	0.0149844	0.0721039	0	24.2728	29.2371	24.3785	29.0843	28.7097	24.08	26.567	26.1536	22.7068	8.53773	10.2839	8.5749	10.2301	10.0984	8.46993	9.3447	9.19929	7.98692
ENSG00000116754.13_2	protein_coding	SRSF11	0.032284	0.62126	0.725591	0	-0.0840029	0.207647	0.417872	0	208.545	183.169	206.682	216.068	208.822	198.295	207.338	191.182	213.106	24.6128	21.618	24.3931	25.5007	24.6456	23.4032	24.4704	22.5636	25.1512
ENSG00000118454.13_3	protein_coding	ANKRD13C	0.0462619	0.475649	0.601058	0	0.0935657	0.156231	0.349645	0	31.7454	32.3358	31.4019	33.034	34.6683	33.0188	32.8044	33.8742	30.0604	5.13347	5.22894	5.07793	5.34185	5.60612	5.3394	5.30473	5.47771	4.861
ENSG00000172006.11_2	protein_coding	ZNF554	0.36603	0.015573	0.0429423	0	-0.0222151	0.877382	0.942146	0	5.8827	4.79789	4.6314	5.74505	4.87522	4.69743	5.65992	3.57078	4.07431	1.25565	1.0241	0.988559	1.22626	1.0406	1.00265	1.20809	0.762174	0.86965
ENSG00000243566.6_4	protein_coding	UPK3B	2.1934	5.58859e-10	2.25276e-08	1	-0.0363279	0.876402	0.941655	0	6.51867	1.69925	1.8831	8.03409	2.05843	1.68743	8.89416	1.2546	1.54029	2.45063	0.638817	0.707931	3.02033	0.773845	0.634371	3.34367	0.471654	0.579055
ENSG00000132485.14_5	protein_coding	ZRANB2	0.0833802	0.269304	0.398598	0	0.0431887	0.562487	0.750364	0	97.0381	85.7123	92.577	99.6407	107.472	93.1277	101.59	96.9902	95.7959	19.466	17.194	18.5711	19.9881	21.559	18.6816	20.3791	19.4564	19.2168
ENSG00000162620.16_6	protein_coding	LRRIQ3	0.216905	0.464921	0.591751	0	-0.0676554	0.824028	0.913049	0	1.16594	0.899604	1.37415	1.21185	1.4084	1.00333	1.61712	0.965077	1.04342	0.133114	0.102706	0.156884	0.138354	0.160794	0.114549	0.184624	0.110181	0.119126
ENSG00000091039.17_5	protein_coding	OSBPL8	-0.949921	1.54676e-08	4.00595e-07	-1	-0.0154788	0.874922	0.940466	0	78.648	155.931	156.551	81.822	158.011	156.52	83.917	153.109	158.997	8.55056	16.9528	17.0202	8.89563	17.1789	17.0168	9.12339	16.6459	17.2861
ENSG00000116791.14_4	protein_coding	CRYZ	0.0971402	0.160531	0.271193	0	0.0531032	0.434643	0.649982	0	38.1051	40.7821	36.2878	39.4074	38.4059	37.169	39.4462	34.3085	35.8738	9.32805	9.98337	8.88317	9.64686	9.4017	9.09889	9.65635	8.39865	8.78183
ENSG00000162623.16_3	protein_coding	TYW3	-0.108855	0.0881863	0.170007	0	-0.0582107	0.346854	0.570849	0	70.2745	75.4168	78.0721	70.0178	74.5368	79.2634	75.3116	73.2493	75.0269	15.2241	16.3381	16.9134	15.1685	16.1475	17.1714	16.3153	15.8686	16.2537
ENSG00000055208.19_5	protein_coding	TAB2	0.22334	0.00169343	0.00716024	0	-0.00979854	0.874176	0.940061	0	130.108	118.848	115.123	139.183	115.597	123.501	144.732	117.739	115.919	21.9704	20.0688	19.4399	23.5027	19.5199	20.8547	24.4398	19.8817	19.5743
ENSG00000117054.13_6	protein_coding	ACADM	0.138899	0.0567588	0.120507	0	-0.00909604	0.895892	0.950075	0	73.4543	68.9197	62.7529	72.7556	67.4406	75.1133	78.9501	66.735	66.3814	15.3574	14.4093	13.12	15.2113	14.1001	15.7042	16.5064	13.9525	13.8786
ENSG00000181227.3_4	processed_pseudogene	DLSTP1	0.493339	0.247153	0.374399	0	-0.0604726	0.892698	0.948689	0	1.05995	0.299868	0.305367	1.3465	0.704199	0.912122	0.981823	1.30285	1.19248	0.782826	0.221468	0.225529	0.994458	0.520088	0.67365	0.725128	0.962226	0.880709
ENSG00000100129.18_6	protein_coding	EIF3L	0.184171	0.00188068	0.00777652	0	0.149287	0.00862789	0.0478545	0	327.259	335.652	288.979	327.064	326.369	311.125	351.262	319.44	284.804	76.1775	78.1314	67.267	76.1322	75.9705	72.422	81.7648	74.3576	66.2952
ENSG00000057468.7_4	protein_coding	MSH4	0.622995	0.0539805	0.115887	0	0.242567	0.449276	0.662015	0	3.49782	2.19903	2.13757	2.91741	1.95009	0.866516	1.90589	2.26793	2.48433	1.06967	0.672487	0.65369	0.892173	0.596358	0.26499	0.582841	0.693557	0.759735
ENSG00000256576.2_6	lncRNA	LINC02361	0.773144	0.00869194	0.0269517	1	-0.0459968	0.873799	0.94	0	2.70286	1.99912	1.78131	2.91741	1.24589	2.55394	3.52301	1.8819	0.944047	1.82134	1.34712	1.20034	1.96591	0.839549	1.72099	2.374	1.26813	0.63615
ENSG00000226415.1_4	processed_pseudogene	TPI1P1	-0.131956	0.582401	0.692423	0	-0.121118	0.611971	0.783182	0	1.58992	1.29943	1.47594	1.12208	1.89592	1.64182	1.73263	1.2546	1.68935	2.11989	1.73257	1.96792	1.49611	2.52789	2.18909	2.31017	1.6728	2.25246
ENSG00000111879.19_6	protein_coding	FAM184A	0.828101	0.000362127	0.00200301	1	0.0333365	0.872862	0.939413	0	3.70981	1.5993	2.13757	3.14182	2.2751	1.55061	3.58077	2.12317	2.18621	0.476167	0.205275	0.274364	0.403263	0.292017	0.199025	0.459603	0.272516	0.280608
ENSG00000173482.16_4	protein_coding	PTPRM	-1.10245	1.23559e-08	3.34768e-07	-1	0.0165983	0.872949	0.939413	0	5.14074	9.49582	9.36458	4.12925	10.7255	9.94213	4.33157	9.31299	9.83796	0.519267	0.959174	0.945918	0.417096	1.08338	1.00426	0.437532	0.940706	0.993734
ENSG00000226084.5_5	processed_pseudogene	AC113935.1	0.186356	0.0584258	0.123195	0	0.132019	0.170459	0.36902	0	18.5491	21.4905	18.6783	23.9227	20.801	20.9788	22.5242	20.4114	17.4897	33.4217	38.7217	33.6545	43.104	37.4792	37.7997	40.5841	36.7772	31.513
ENSG00000124596.17_6	protein_coding	OARD1	-0.329898	0.000180081	0.00111248	0	0.0112047	0.872628	0.939348	0	20.404	24.8891	24.582	19.0754	25.4595	26.3147	20.7338	25.8158	24.6446	3.12513	3.81208	3.76505	2.92163	3.89945	4.03044	3.17565	3.95402	3.77464
ENSG00000092853.14_4	protein_coding	CLSPN	-0.654066	7.34658e-10	2.80472e-08	-1	-0.00900914	0.872572	0.939348	0	65.8227	102.205	103.061	67.1452	104.709	100.926	64.396	101.864	106.727	6.86296	10.6563	10.7456	7.00086	10.9174	10.523	6.71421	10.6208	11.1278
ENSG00000172081.14_4	protein_coding	MOB3A	0.366931	0.000172351	0.00106792	0	0.0130208	0.87159	0.939098	0	44.9417	32.7856	32.8269	38.6893	30.6597	30.8297	36.674	30.6894	29.6629	10.8424	7.90967	7.91965	9.33397	7.3968	7.43781	8.84776	7.40396	7.15632
ENSG00000120820.12_4	protein_coding	GLT8D2	-1.7482	6.20643e-10	2.46058e-08	-1	-0.0204264	0.871569	0.939098	0	1.9079	7.24681	6.26002	2.06463	6.01278	7.66183	1.96365	6.46601	6.06178	0.583279	2.21547	1.91379	0.631191	1.83821	2.34235	0.60032	1.97677	1.85319
ENSG00000151617.17_5	protein_coding	EDNRA	-0.8458	0.00022723	0.00134945	-1	-0.52355	0.00862846	0.0478545	0	1.9079	2.39894	3.35904	2.24416	2.16677	4.10455	1.79038	2.89523	3.27932	0.45019	0.566056	0.792599	0.529533	0.511271	0.968511	0.422459	0.683159	0.77379
ENSG00000145882.11_3	protein_coding	PCYOX1L	-0.188104	0.00789945	0.0249174	0	-0.0102986	0.870711	0.938895	0	29.2545	33.4853	32.5725	29.0843	33.4765	35.1167	28.7616	31.6063	31.5014	4.84427	5.54484	5.39369	4.81608	5.54339	5.81499	4.76265	5.23369	5.21632
ENSG00000137941.17_4	protein_coding	TTLL7	-0.222264	0.0315427	0.0756259	0	-0.0893958	0.356031	0.579701	0	14.4683	18.5918	20.5105	16.7863	17.1175	17.3759	17.4418	17.6609	18.9803	1.37179	1.76276	1.94467	1.59157	1.62297	1.64748	1.65372	1.6745	1.79959
ENSG00000271576.1_6	lncRNA	AL359504.2	-0.100016	0.723725	0.804938	0	0.119828	0.663233	0.819234	0	1.69591	1.19947	1.37415	1.12208	1.67924	1.4594	1.3861	1.97841	1.63966	1.05928	0.749202	0.858308	0.700862	1.04887	0.911552	0.865773	1.23573	1.02415
ENSG00000149131.15_4	protein_coding	SERPING1	-3.13993	2.68582e-06	3.18219e-05	-1	0.0499599	0.870428	0.93873	0	0.211989	1.34941	1.32326	0.13465	1.78758	1.68743	0.115509	1.2546	1.19248	0.0588369	0.374523	0.367265	0.0373715	0.496137	0.468339	0.032059	0.34821	0.330969
ENSG00000110328.6_4	protein_coding	GALNT18	-0.358359	0.0014296	0.0062226	0	-0.0154166	0.870205	0.938727	0	14.7333	18.3919	16.0827	14.8563	20.5843	20.2491	14.4386	16.9853	20.0734	4.06323	5.07223	4.43537	4.09717	5.67686	5.58442	3.98196	4.68432	5.53597
ENSG00000237753.2_7	lncRNA	AC079922.2	0.782926	0.000160224	0.00100661	1	0.0294511	0.870135	0.938727	0	4.76976	2.69881	2.85009	5.11668	3.08764	3.10122	4.10055	2.55745	2.18621	1.47945	0.837101	0.884023	1.58706	0.957705	0.961915	1.27188	0.793255	0.678106
ENSG00000131746.13_4	protein_coding	TNS4	-0.416241	7.94361e-06	8.10709e-05	0	0.0111768	0.869599	0.938327	0	102.55	132.592	131.053	88.6892	124.914	117.892	91.1363	122.13	127.844	21.0445	27.2095	26.8938	18.2001	25.6339	24.1929	18.7023	25.0627	26.2351
ENSG00000198464.14_3	protein_coding	ZNF480	-0.382269	0.000118748	0.000784638	0	0.0129149	0.868265	0.937556	0	24.4848	35.9842	34.5065	28.7701	34.8308	36.3937	26.6247	34.405	33.3398	5.05466	7.42861	7.12355	5.93933	7.1905	7.51314	5.49643	7.1026	6.88269
ENSG00000100902.10_5	protein_coding	PSMA6	0.178083	0.018421	0.0491647	0	0.011738	0.867421	0.937158	0	33.3883	29.537	28.959	30.7899	29.4139	30.7841	35.8654	30.0139	28.4705	5.13193	4.53996	4.45112	4.73253	4.52103	4.73165	5.51267	4.61326	4.37603
ENSG00000204710.2_2	protein_coding	SPDYC	1.06764	0.00223019	0.0089226	1	0.0577817	0.867426	0.937158	0	1.53692	0.649714	0.45805	1.48115	0.541692	0.684092	1.15509	0.868569	0.844674	1.55088	0.655615	0.46221	1.4946	0.546611	0.690304	1.16558	0.876457	0.852345
ENSG00000180385.8_4	transcribed_unprocessed_pseudogene	EMC3-AS1	0.460185	0.0159225	0.0437254	0	-0.0307421	0.866735	0.936918	0	7.57862	4.548	6.71807	9.0664	6.22945	4.24137	6.23746	5.6457	5.86303	2.04055	1.22456	1.80885	2.44114	1.67729	1.14199	1.67945	1.52011	1.57863
ENSG00000162643.13_4	protein_coding	WDR63	0.0110359	0.964179	0.975946	0	0.422803	0.0844238	0.235606	0	1.9079	1.74923	1.62862	1.79533	2.8168	1.59621	1.09733	1.93015	1.58997	0.486338	0.445891	0.415147	0.457641	0.718021	0.406886	0.279717	0.492009	0.405295
ENSG00000055732.13_3	protein_coding	MCOLN3	-0.069867	0.636596	0.738126	0	0.150672	0.306718	0.530534	0	17.3831	17.2924	20.1033	22.8007	25.947	17.2847	14.7851	21.4247	20.8187	2.62426	2.61057	3.03492	3.44213	3.91712	2.60941	2.23205	3.23441	3.14292
ENSG00000280099.1_5	TEC	AL603750.1	0.0210754	0.945224	0.963042	0	0.367034	0.218859	0.43194	0	0.741963	0.74967	0.916101	0.807897	1.02921	0.912122	0.924068	1.35111	0.59624	0.432127	0.436616	0.533547	0.470528	0.599426	0.53123	0.538188	0.7869	0.347257
ENSG00000133895.14_5	protein_coding	MEN1	0.168239	0.00688975	0.0222828	0	-0.00948362	0.866042	0.936379	0	139.224	124.145	124.691	136.445	116.951	121.768	132.719	119.959	117.012	32.7894	29.2382	29.3668	32.1349	27.5439	28.6784	31.2575	28.2522	27.5582
ENSG00000162642.14_3	protein_coding	C1orf52	-0.0145791	0.839613	0.890916	0	-0.0684628	0.348392	0.572168	0	26.7637	25.5887	26.1089	27.1543	26.2179	28.595	26.6247	25.8158	26.6321	7.82563	7.48209	7.63417	7.93986	7.66604	8.36112	7.78501	7.54848	7.78715
ENSG00000142867.14_5	protein_coding	BCL10	0.113304	0.127922	0.227907	0	0.0237368	0.743049	0.870227	0	28.8835	25.4388	26.3633	28.9497	27.1929	28.0478	28.2418	28.2767	25.1415	6.64601	5.85338	6.06612	6.66122	6.257	6.45369	6.49835	6.50638	5.78497
ENSG00000107104.18_3	protein_coding	KANK1	-0.786894	1.02957e-08	2.85724e-07	-1	0.0130397	0.865845	0.936236	0	17.1181	32.1359	30.9947	17.2351	28.4388	26.634	17.0953	29.0006	31.2529	1.43753	2.69868	2.60285	1.44736	2.38821	2.23664	1.43561	2.43538	2.62453
ENSG00000168994.13_2	protein_coding	PXDC1	-0.523989	0.00038434	0.00210012	0	0.0197203	0.865487	0.935919	0	4.92875	6.99692	7.27791	4.44344	6.44613	6.84092	4.6781	6.99681	6.06178	1.99222	2.82818	2.94176	1.79605	2.60555	2.76512	1.8909	2.82813	2.45019
ENSG00000072110.13_4	protein_coding	ACTN1	-0.178402	0.00161636	0.00689903	0	-0.00830157	0.865102	0.935853	0	235.096	271.631	271.268	225.089	253.728	254.756	233.616	255.166	259.066	22.1246	25.5628	25.5287	21.1829	23.8781	23.9748	21.9853	24.0134	24.3804
ENSG00000122417.15_8	protein_coding	ODF2L	-0.131055	0.167112	0.279313	0	-0.109658	0.242696	0.458663	0	23.1068	20.3411	25.3963	24.0574	25.1887	24.1712	23.6215	26.3466	28.0233	2.12028	1.86649	2.33037	2.2075	2.31131	2.21795	2.16751	2.41756	2.57142
ENSG00000097033.14_4	protein_coding	SH3GLB1	-0.100469	0.114978	0.20937	0	-0.0141663	0.817399	0.910669	0	61.1059	65.921	68.7075	63.9585	71.72	69.9598	70.4025	69.775	70.7538	8.88038	9.58015	9.98511	9.29495	10.4229	10.1671	10.2314	10.1402	10.2825
ENSG00000128228.5_3	protein_coding	SDF2L1	-0.475336	0.000191231	0.00117422	0	-0.297413	0.00862736	0.0478545	0	36.5152	43.5309	50.64	32.0915	35.1558	48.6617	33.9018	37.1072	43.0784	34.4808	41.1056	47.8187	30.3036	33.1972	45.9506	32.013	35.0398	40.6783
ENSG00000153936.17_4	protein_coding	HS2ST1	0.0710991	0.245534	0.3729	0	0.111748	0.0746624	0.217843	0	58.88	59.5738	55.5259	58.4828	64.7863	56.8252	60.7575	58.8697	57.1397	7.9289	8.02233	7.47722	7.87541	8.72425	7.6522	8.18173	7.92751	7.69454
ENSG00000114796.16_5	protein_coding	KLHL24	0.358154	0.00365351	0.0134081	0	0.0191605	0.863648	0.934771	0	15.4752	13.544	13.4361	18.9407	13.9756	13.0433	17.4995	13.6076	14.111	1.78904	1.56579	1.55331	2.18968	1.61568	1.5079	2.02307	1.57313	1.63133
ENSG00000065243.20_5	protein_coding	PKN2	0.136077	0.105727	0.195986	0	0.0227142	0.779946	0.891728	0	112.937	108.452	106.929	128.905	116.735	110.184	123.479	112.673	115.422	16.3748	15.7246	15.5037	18.6899	16.9254	15.9757	17.9032	16.3365	16.7351
ENSG00000241975.1_4	processed_pseudogene	ELOCP19	0.686245	0.100428	0.188489	0	-0.0278967	0.949765	0.976681	0	0.953952	0.399824	0.508945	1.0772	0.704199	0.228031	0.693051	0.579046	0.993734	2.99985	1.25731	1.60046	3.38741	2.21446	0.717077	2.17941	1.8209	3.12495
ENSG00000137947.12_4	protein_coding	GTF2B	-0.0969432	0.229932	0.355285	0	0.0120864	0.877752	0.942151	0	30.9504	33.2354	33.743	30.745	32.7723	35.9376	31.1296	34.0672	29.5139	12.2625	13.1677	13.3689	12.1811	12.9843	14.2384	12.3334	13.4973	11.6933
ENSG00000125386.15_5	protein_coding	FAM193A	0.214943	0.00686689	0.0222334	0	-0.0124994	0.862902	0.934307	0	32.5934	29.1872	28.8063	33.4829	25.3512	26.862	31.9381	29.1453	28.868	4.68363	4.19416	4.13943	4.81145	3.64293	3.86004	4.58947	4.18815	4.14829
ENSG00000219545.11_3	protein_coding	UMAD1	-0.400555	0.00158781	0.00679932	0	-0.0183453	0.86262	0.934131	0	8.69156	11.4949	11.8584	7.80967	12.2964	12.6785	10.2803	10.9536	10.5833	2.31651	3.06368	3.16056	2.08147	3.27729	3.37913	2.73994	2.91941	2.8207
ENSG00000128602.11_5	protein_coding	SMO	-0.251763	0.0047009	0.0164817	0	0.0135641	0.861895	0.933854	0	21.1459	27.6378	26.2615	23.6983	26.5971	26.634	22.0621	26.2983	26.8805	4.45178	5.81849	5.52875	4.98912	5.59938	5.60715	4.64466	5.53649	5.65905
ENSG00000197147.13_3	protein_coding	LRRC8B	-0.173121	0.0281646	0.0690291	0	-0.064353	0.384401	0.607149	0	38.6351	41.3318	44.1764	44.3446	45.3396	47.1111	38.9264	45.0208	46.3577	4.70413	5.03249	5.37884	5.39932	5.52047	5.73616	4.73961	5.48165	5.64443
ENSG00000231999.7_6	lncRNA	LRRC8C-DT	0.0604884	0.871472	0.912775	0	-0.053561	0.887844	0.946231	0	0.847957	0.699692	1.06878	1.3465	0.866707	0.866516	0.40428	0.916823	0.645927	0.0708106	0.0584294	0.0892513	0.112442	0.0723763	0.0723604	0.0337603	0.0765614	0.0539396
ENSG00000168398.6_4	protein_coding	BDKRB2	2.87976	7.30666e-08	1.47678e-06	1	-0.0871635	0.861849	0.933854	0	2.80886	0.149934	0.305367	2.37881	0.541692	0.319243	2.07915	0.241269	0.347807	0.410352	0.0219042	0.0446117	0.347525	0.0791368	0.0466388	0.303748	0.0352475	0.0508118
ENSG00000165591.6_2	protein_coding	FAAH2	-0.735515	0.00375734	0.0137029	-1	0.0358817	0.86152	0.933589	0	1.53692	2.24901	2.29025	1.43626	2.05843	2.14349	0.924068	2.41269	2.13653	0.76123	1.11392	1.13435	0.711373	1.01953	1.06166	0.457686	1.19499	1.05821
ENSG00000228175.3_4	processed_pseudogene	GEMIN8P4	0.411306	0.142247	0.246904	0	0.228927	0.41332	0.632314	0	1.69591	1.19947	1.17057	1.39138	1.24589	1.32258	1.09733	1.2546	0.645927	2.32636	1.64537	1.60572	1.90861	1.70904	1.81423	1.50526	1.72099	0.886045
ENSG00000210194.1	Mt_tRNA	MT-TE	1.5977	0.00545998	0.0185426	1	0.110474	0.860556	0.933104	0	1.16594	0.24989	0.610734	2.15439	0.65003	0.182424	0.40428	0.482538	0.496867	16.8977	3.6216	8.85121	31.2231	9.42072	2.64383	5.85913	6.99331	7.20097
ENSG00000233593.10_8	lncRNA	LINC02609	-0.27518	0.258433	0.387033	0	0.22217	0.330624	0.555253	0	1.16594	1.74923	1.8831	1.48115	1.78758	1.41379	1.27059	2.02666	1.4906	0.0812276	0.121864	0.13119	0.103187	0.124535	0.0984944	0.0885185	0.141191	0.103846
ENSG00000122482.21_3	protein_coding	ZNF644	0.00211529	0.97906	0.98645	0	0.0477594	0.554579	0.745379	0	79.867	84.6628	79.2427	83.0788	89.8125	86.1043	85.5341	82.0315	82.6786	10.5033	11.134	10.4212	10.9257	11.8112	11.3236	11.2486	10.7879	10.873
ENSG00000135046.14_4	protein_coding	ANXA1	0.294329	3.96094e-05	0.00031711	0	-0.00982665	0.859749	0.93265	0	726.434	607.233	590.376	748.786	610.595	654.037	759.989	592.509	578.204	163.134	136.365	132.579	168.153	137.12	146.876	170.669	133.058	129.846
ENSG00000143549.21_5	protein_coding	TPM3	-0.170925	0.00205209	0.00833017	0	0.00854321	0.859487	0.932589	0	446.238	513.024	517.088	445.062	525.658	519.089	474.971	508.499	501.835	29.443	33.8496	34.1177	29.3654	34.6831	34.2497	31.3388	33.551	33.1113
ENSG00000076604.15_4	protein_coding	TRAF4	0.198491	0.00296506	0.0112929	0	-0.0104986	0.858904	0.932448	0	104.882	87.6115	91.4574	101.256	88.6207	85.2834	98.8753	87.6772	89.1379	22.935	19.1584	19.9994	22.1422	19.3791	18.6493	21.6215	19.1728	19.4922
ENSG00000215908.10_3	transcribed_unprocessed_pseudogene	CROCCP2	0.486582	3.68194e-05	0.000300193	0	-0.0167053	0.858383	0.932219	0	40.649	25.5388	30.1295	43.4918	29.468	25.2202	35.9809	29.9174	30.6567	7.25097	4.55561	5.37451	7.75808	5.25651	4.49878	6.41829	5.33667	5.46855
ENSG00000196116.8_3	protein_coding	TDRD7	-0.473394	6.42845e-06	6.75666e-05	0	0.0135006	0.856022	0.930776	0	17.0121	24.0894	22.5971	17.1005	22.426	25.5394	16.46	24.3682	22.0609	4.07574	5.7713	5.41379	4.09691	5.37279	6.11869	3.94345	5.83809	5.28531
ENSG00000122484.9_3	protein_coding	RPAP2	0.00564286	0.943124	0.961514	0	0.00852715	0.914056	0.95849	0	52.7853	48.8285	51.9124	50.9873	50.9732	45.9253	48.5714	52.8862	54.0591	3.09628	2.86418	3.04507	2.99081	2.98998	2.69388	2.84909	3.10219	3.17099
ENSG00000089505.17_4	protein_coding	CMTM1	0.684997	0.0122383	0.0354537	1	-0.0493503	0.855335	0.930512	0	2.64987	1.34941	1.57773	1.66068	1.24589	1.14015	2.42568	1.39936	1.44091	1.80878	0.921097	1.07695	1.13357	0.850437	0.778261	1.65575	0.955195	0.983559
ENSG00000067208.14_3	protein_coding	EVI5	-0.00539439	0.951339	0.967496	0	0.0792601	0.371871	0.593899	0	18.8141	23.1898	23.8186	22.8007	22.5344	20.0667	23.1017	22.9206	21.1665	2.27333	2.80205	2.87803	2.75503	2.72286	2.42468	2.79141	2.76952	2.55758
ENSG00000122406.14_4	protein_coding	RPL5	0.0858262	0.143963	0.248955	0	0.0774653	0.184846	0.387608	0	1039.6	1044.79	974.527	1051.16	1098.17	1069.51	1110.5	1039.77	972.219	281.962	283.371	264.314	285.1	297.85	290.076	301.193	282.011	263.688
ENSG00000154511.12_3	protein_coding	DIPK1A	0.0276567	0.796687	0.859144	0	-0.0509492	0.637416	0.801621	0	9.32753	8.6462	7.73596	9.42547	8.72123	9.66849	8.66314	8.63744	9.49016	3.01764	2.79722	2.50274	3.04933	2.82149	3.12795	2.8027	2.79438	3.07025
ENSG00000251795.1	snoRNA	SNORA66	0.115579	0.711649	0.795554	0	0.256016	0.407715	0.627263	0	1.11294	0.699692	0.916101	1.30161	1.24589	1.00333	0.750806	1.59238	1.04342	20.9989	13.2017	17.2849	24.5587	23.5074	18.9308	14.1661	30.0448	19.6872
ENSG00000143033.18_3	protein_coding	MTF2	0.106267	0.171626	0.284783	0	0.206451	0.0122774	0.0627391	0	45.2597	51.5773	44.4818	51.2117	55.3609	47.0655	51.2858	51.5351	45.7117	7.66205	8.73156	7.53035	8.66967	9.37208	7.96775	8.68221	8.72441	7.73857
ENSG00000197535.14_3	protein_coding	MYO5A	-0.366591	0.00125988	0.00561324	0	-0.0175575	0.855443	0.930512	0	53.1033	69.5694	70.6924	54.3984	70.6366	65.8096	56.0794	68.1344	74.4307	4.08865	5.35644	5.4429	4.18836	5.4386	5.06695	4.31779	5.24595	5.73072
ENSG00000122483.17_5	protein_coding	CCDC18	0.026107	0.768057	0.83816	0	0.142605	0.116467	0.29081	0	30.4205	31.6361	29.1116	31.3285	33.3682	30.6473	33.2665	37.8793	33.4888	5.4004	5.61621	5.16805	5.56159	5.9237	5.44067	5.90564	6.72453	5.94511
ENSG00000223745.8_7	lncRNA	CCDC18-AS1	0.0515348	0.702135	0.788338	0	-0.0277252	0.837572	0.920564	0	9.27453	6.79701	9.11011	9.11129	8.88374	7.84425	7.62357	9.02347	8.24799	1.4759	1.08164	1.44973	1.44992	1.41371	1.24829	1.21317	1.43594	1.31254
ENSG00000117505.13_3	protein_coding	DR1	-0.0486052	0.392245	0.523005	0	0.0513794	0.365236	0.587922	0	122.265	134.891	132.377	128.949	141.382	133.261	130.64	133.036	129.285	11.1913	12.347	12.1168	11.8031	12.9411	12.1978	11.9579	12.1772	11.8338
ENSG00000242612.7_4	protein_coding	DECR2	0.329508	0.0111951	0.0331147	0	-0.0222382	0.855114	0.930507	0	12.1894	8.74615	7.99043	11.535	9.69628	9.16683	10.1648	8.20315	9.83796	3.03672	2.17891	1.99064	2.87369	2.41562	2.28371	2.53233	2.04363	2.45091
ENSG00000180233.11_4	protein_coding	ZNRF2	-0.517296	0.000703752	0.00347922	0	0.0224066	0.854856	0.930507	0	4.87575	6.54712	7.73596	5.47575	7.31284	7.16016	4.44708	7.76887	6.40958	1.43278	1.92393	2.27328	1.60909	2.14894	2.10407	1.30681	2.28295	1.88351
ENSG00000067334.14_4	protein_coding	DNTTIP2	-0.0742469	0.182436	0.298394	0	-0.0586508	0.287451	0.510042	0	130.002	129.293	136.957	133.662	142.519	147.992	136.011	132.264	135.744	17.2922	17.1978	18.2172	17.7789	18.957	19.685	18.0914	17.5929	18.0559
ENSG00000219891.2_2	transcribed_unprocessed_pseudogene	ZSCAN12P1	-0.547585	0.0135972	0.0385504	0	-0.0353985	0.854166	0.930397	0	2.33188	3.49846	4.17335	2.15439	2.9793	2.73637	2.07915	2.89523	2.73277	1.40729	2.11132	2.51862	1.30018	1.79801	1.6514	1.25477	1.74727	1.64923
ENSG00000128872.10_4	protein_coding	TMOD2	-0.594307	3.84581e-05	0.000309877	-1	0.0196786	0.853647	0.930086	0	10.5995	16.0929	16.6425	11.1759	16.7383	16.555	10.3958	16.5028	15.4526	0.914141	1.38792	1.43532	0.963856	1.44358	1.42777	0.896574	1.42327	1.33269
ENSG00000248383.4_4	protein_coding	PCDHAC1	-1.03258	0.00355677	0.0131206	-1	-0.0517191	0.852685	0.929388	0	0.635968	1.5993	2.69741	1.12208	1.84175	1.23136	0.981823	2.02666	1.78872	0.0915984	0.230347	0.388507	0.161613	0.265267	0.177353	0.141412	0.2919	0.257629
ENSG00000117528.13_4	protein_coding	ABCD3	-0.0937931	0.179549	0.294842	0	-0.0309762	0.649533	0.810008	0	87.5516	94.8083	92.8824	89.7664	95.3919	100.379	94.0817	93.2264	96.2431	11.4372	12.3851	12.1336	11.7265	12.4614	13.1129	12.2902	12.1785	12.5726
ENSG00000100376.12_3	protein_coding	FAM118A	0.220428	0.00314792	0.0118796	0	-0.0123428	0.852542	0.929388	0	51.0894	39.8825	43.3621	47.0376	40.4102	40.3614	45.7414	42.1256	39.799	7.95166	6.20739	6.74896	7.32102	6.28952	6.28193	7.11928	6.55651	6.1944
ENSG00000140832.9_3	protein_coding	MARVELD3	-0.263461	0.00128763	0.00572101	0	-0.0128851	0.852503	0.929388	0	28.6716	34.3349	34.6082	26.7953	31.7973	33.7485	29.7435	35.0323	33.7869	4.44796	5.32654	5.36895	4.15688	4.93287	5.23558	4.61425	5.43473	5.24154
ENSG00000143036.17_4	protein_coding	SLC44A3	-0.123215	0.336355	0.469524	0	0.138039	0.27152	0.491787	0	6.88965	7.44672	8.14312	7.09154	9.91296	8.39152	7.39255	8.29966	6.7077	2.40141	2.59558	2.83831	2.47178	3.4552	2.92489	2.5767	2.89287	2.33799
ENSG00000267080.6_6	lncRNA	ASB16-AS1	0.273315	0.00815096	0.0255488	0	-0.017781	0.852004	0.929232	0	14.7863	12.2446	12.8763	16.6517	12.5131	13.6818	14.9584	13.2215	11.8751	4.04106	3.34644	3.51908	4.55088	3.41981	3.73923	4.0881	3.61343	3.24545
ENSG00000235501.6_6	lncRNA	AC105942.1	-0.748704	0.0248413	0.0623853	0	0.375438	0.170891	0.369678	0	0.370981	1.14949	0.966995	0.583481	1.35423	0.866516	0.693051	1.10984	0.944047	0.14739	0.456692	0.384186	0.231816	0.538033	0.344265	0.275348	0.440937	0.375068
ENSG00000176909.12_6	protein_coding	MAMSTR	0.63431	0.0103167	0.0309715	1	0.0448441	0.851609	0.928987	0	2.43788	1.34941	1.42505	1.66068	1.67924	1.32258	2.31017	1.20635	1.34154	1.06644	0.590292	0.623379	0.726456	0.734577	0.578555	1.01057	0.52771	0.586851
ENSG00000167815.12_4	protein_coding	PRDX2	0.280554	0.000416716	0.00224893	0	0.0124778	0.850764	0.928479	0	265.941	229.149	225.921	259.649	214.672	220.962	267.749	214.923	206.2	130.748	112.659	111.072	127.654	105.542	108.634	131.637	105.665	101.376
ENSG00000122481.17_4	protein_coding	RWDD3	-0.134936	0.383003	0.51476	0	-0.163599	0.292533	0.515451	0	3.9218	3.89829	4.42782	4.03949	3.79184	4.33258	4.56259	4.53586	4.96867	2.03519	2.02298	2.29778	2.09626	1.96774	2.24835	2.36772	2.35385	2.57845
ENSG00000228502.1_4	processed_pseudogene	EEF1A1P11	0.173009	0.528253	0.648724	0	-0.119471	0.670983	0.824854	0	3.12684	3.29855	2.39204	2.06463	1.13755	2.18909	2.59894	1.83365	2.28559	2.25115	2.37477	1.72213	1.48641	0.818972	1.57602	1.87109	1.32012	1.64549
ENSG00000137970.7_4	processed_pseudogene	RPL7P9	0.305025	0.161405	0.272107	0	0.194327	0.369195	0.590933	0	3.76281	3.49846	2.69741	3.90484	3.30432	2.82758	2.77221	2.94348	2.9812	5.03723	4.68335	3.61099	5.22736	4.42345	3.78525	3.71112	3.94041	3.9909
ENSG00000117569.18_2	protein_coding	PTBP2	0.147217	0.261713	0.390768	0	0.00188139	0.988475	0.995121	0	11.4474	9.096	11.095	12.3878	13.1089	9.62289	11.6664	10.0368	11.4279	0.884859	0.7031	0.857617	0.957545	1.01329	0.743827	0.901783	0.775821	0.883353
ENSG00000103269.13_3	protein_coding	RHBDL1	0.585731	0.00489999	0.0170144	1	-0.0371874	0.849748	0.927587	0	8.74456	3.44848	5.80197	7.58526	5.0919	4.33258	5.83318	5.88697	4.72023	4.64149	1.83041	3.0796	4.02615	2.70271	2.29967	3.09617	3.12472	2.50543
ENSG00000226752.9_5	transcribed_unitary_pseudogene	CUTALP	0.278501	0.0115361	0.0338575	0	0.0194307	0.849626	0.927538	0	14.9982	10.9452	12.8763	15.3052	12.5131	11.7208	12.6482	12.546	10.9311	2.07617	1.51511	1.78243	2.11866	1.73215	1.62248	1.75086	1.73671	1.51316
ENSG00000268573.1_7	lncRNA	AC011815.1	0.647329	0.00959441	0.0292165	1	-0.0462802	0.848722	0.926982	0	3.9748	2.64883	2.23936	4.44344	2.32927	2.28031	3.58077	2.46095	3.17995	0.907074	0.604481	0.511035	1.01402	0.531555	0.52038	0.817153	0.561603	0.725684
ENSG00000116857.17_4	protein_coding	TMEM9	-0.222978	0.00325684	0.0122394	0	-0.0127258	0.847704	0.926478	0	53.1033	61.473	61.9386	49.1471	58.611	59.4248	50.1307	56.1675	56.4441	13.5502	15.6859	15.8047	12.5407	14.9556	15.1632	12.7917	14.3321	14.4027
ENSG00000117620.15_5	protein_coding	SLC35A3	0.0158848	0.871751	0.912923	0	-0.063094	0.524966	0.72364	0	23.9018	23.4897	24.8365	26.0771	23.9428	24.5361	25.3541	23.9339	25.1911	1.31076	1.28816	1.36202	1.43006	1.31301	1.34555	1.39041	1.31253	1.38147
ENSG00000131018.23_2	protein_coding	SYNE1	-1.38337	4.44101e-07	6.80341e-06	-1	-0.489272	0.00861321	0.0478434	0	2.86186	7.64664	10.6878	4.5332	6.12111	7.29698	3.58077	6.80379	11.0304	0.0621278	0.166	0.232022	0.0984109	0.132883	0.15841	0.0777346	0.147703	0.239459
ENSG00000156876.10_4	protein_coding	SASS6	-0.104076	0.237972	0.364137	0	-0.124887	0.160095	0.355121	0	35.0312	35.8342	39.1379	36.0412	36.9975	35.2535	36.443	33.1986	41.2399	8.81955	9.02171	9.85344	9.07382	9.31459	8.87551	9.17496	8.35817	10.3827
ENSG00000122435.10_3	protein_coding	TRMT13	-0.0769611	0.420675	0.550436	0	-0.0839543	0.379909	0.602734	0	14.3623	14.4936	15.5228	14.6319	14.7882	14.2291	14.6696	14.1866	16.3469	3.47418	3.50596	3.75491	3.53941	3.57721	3.44197	3.54852	3.43169	3.95426
ENSG00000122477.12_2	protein_coding	LRRC39	0.200033	0.559335	0.674327	0	-0.637881	0.106388	0.2733	0	1.05995	0.649714	0.508945	0.718131	0.379184	1.09455	0.981823	0.482538	0.7453	0.532369	0.326326	0.255623	0.360689	0.190449	0.549747	0.49313	0.24236	0.374335
ENSG00000137992.14_2	protein_coding	DBT	-0.19017	0.0204508	0.0533966	0	-0.00678768	0.928093	0.96598	0	36.6212	44.4804	42.9549	36.0861	40.9519	43.0066	38.3488	40.5815	40.6437	3.23995	3.93528	3.80031	3.19261	3.6231	3.80488	3.3928	3.59033	3.59583
ENSG00000224616.3_7	lncRNA	RTCA-AS1	0.312502	0.297924	0.429849	0	-0.439152	0.185381	0.388247	0	1.85491	0.549758	1.37415	1.70556	1.08338	1.09455	0.924068	1.06158	1.19248	0.184862	0.0547895	0.136949	0.169978	0.107971	0.109084	0.0920937	0.105799	0.118844
ENSG00000140688.17_4	protein_coding	C16orf58	0.254579	0.000550632	0.00283693	0	0.0119957	0.847583	0.926418	0	50.7184	42.0815	43.3112	47.1273	40.0852	40.7263	51.1703	43.6215	40.7928	14.0572	11.6634	12.0042	13.0619	11.1101	11.2878	14.1825	12.0902	11.3062
ENSG00000079335.20_6	protein_coding	CDC14A	-0.00767482	0.954157	0.969247	0	0.0733405	0.581069	0.763286	0	6.99565	7.29679	7.27791	8.21362	9.42543	7.93546	8.89416	8.7822	8.99329	1.0746	1.12086	1.11796	1.26169	1.44784	1.21896	1.36623	1.34903	1.38146
ENSG00000162694.14_4	protein_coding	EXTL2	0.122394	0.126474	0.225885	0	0.0160266	0.836919	0.920477	0	33.8653	30.2867	32.3689	36.49	36.835	34.2046	38.9841	34.4532	33.7869	8.43469	7.54338	8.06199	9.08843	9.17435	8.5192	9.70962	8.58113	8.41518
ENSG00000162695.12_4	protein_coding	SLC30A7	0.0897517	0.200802	0.320963	0	-0.0180293	0.793617	0.89825	0	36.9921	34.5348	35.5243	41.2476	37.3767	34.9343	38.5799	36.6247	39.4512	4.30141	4.01568	4.13074	4.79624	4.34613	4.06213	4.48603	4.25868	4.58735
ENSG00000117543.21_5	protein_coding	DPH5	-0.151624	0.0639356	0.132125	0	-0.041419	0.593564	0.771152	0	23.7958	25.4888	24.9892	23.7881	27.6263	29.9632	25.5274	25.7675	26.0855	8.01205	8.58208	8.41387	8.00946	9.30177	10.0886	8.59508	8.67594	8.783
ENSG00000233184.7_7	lncRNA	AC093157.1	-0.178382	0.186403	0.303404	0	0.0366728	0.776558	0.889709	0	6.0417	7.0469	6.76897	7.54037	8.17954	7.38819	5.60217	7.23807	7.70144	0.612251	0.714116	0.685951	0.764124	0.828896	0.748702	0.56771	0.733489	0.780445
ENSG00000185946.16_4	protein_coding	RNPC3	0.309673	0.0519701	0.112338	0	0.0721354	0.639548	0.803108	0	13.8323	8.39631	10.2807	15.2154	14.734	11.4927	13.5723	13.1733	12.6701	2.01432	1.2227	1.49711	2.21573	2.14563	1.67362	1.97645	1.91835	1.84507
ENSG00000109680.11_5	protein_coding	TBC1D19	-0.498537	0.00709931	0.0228123	0	0.0307815	0.846054	0.92532	0	3.23284	5.89741	5.34392	5.11668	6.82531	7.02334	4.73585	6.273	6.16115	0.781256	1.42518	1.29143	1.23651	1.64942	1.69728	1.14448	1.51595	1.48892
ENSG00000119953.12_2	protein_coding	SMNDC1	0.228686	0.000741665	0.00362076	0	0.011274	0.844973	0.924642	0	96.3492	85.1625	85.5536	98.3839	91.0042	88.9775	107.365	83.6239	83.1258	17.7864	15.7213	15.7935	18.1621	16.7997	16.4256	19.82	15.4373	15.3454
ENSG00000151229.13_4	protein_coding	SLC2A13	-0.403258	0.00253023	0.00987926	0	0.0221237	0.844236	0.924364	0	6.67766	10.0956	9.61906	7.80967	10.563	10.6262	8.60539	10.3263	10.2355	0.666234	1.00724	0.959698	0.779175	1.05387	1.06018	0.858564	1.03026	1.0212
ENSG00000134186.12_3	protein_coding	PRPF38B	-0.040744	0.480105	0.604677	0	-0.121281	0.0458149	0.156969	0	95.3422	86.9118	100.008	103.142	92.4126	98.5548	91.656	95.2531	100.119	13.7084	12.4963	14.3792	14.8298	13.2872	14.1704	13.1784	13.6956	14.3952
ENSG00000116266.11_3	protein_coding	STXBP3	0.125318	0.111079	0.203709	0	0.0384023	0.615037	0.785451	0	38.794	37.2336	35.8806	37.6121	38.5143	38.7652	41.6408	35.3218	33.3895	6.58419	6.31935	6.08972	6.38359	6.53671	6.57929	7.06735	5.99487	5.66691
ENSG00000123989.14_4	protein_coding	CHPF	-0.983822	4.17573e-11	2.32664e-09	-1	-0.0141088	0.843453	0.923791	0	234.725	463.746	448.279	208.527	400.798	440.19	209.302	413.342	402.015	69.5482	137.406	132.823	61.7859	118.755	130.427	62.0153	122.472	119.116
ENSG00000121940.15_3	protein_coding	CLCC1	0.0274045	0.759463	0.831548	0	-0.0286955	0.749025	0.873611	0	16.9061	15.5931	16.0827	15.2603	17.2258	17.1023	16.9798	14.4279	14.906	3.40575	3.14125	3.23986	3.07419	3.47014	3.44526	3.42058	2.90651	3.00282
ENSG00000085433.15_6	protein_coding	WDR47	-0.0578587	0.485462	0.609456	0	-0.113422	0.18044	0.382369	0	19.609	20.441	21.1212	22.666	21.5052	23.9432	21.0803	19.1568	20.9181	4.43342	4.62153	4.77531	5.12458	4.86212	5.41334	4.76607	4.33117	4.72939
ENSG00000244716.3_5	processed_pseudogene	BX679664.3	0.156852	0.698502	0.785849	0	0.0983079	0.808912	0.906955	0	0.847957	0.599736	0.966995	0.493715	0.704199	0.364849	0.519789	0.482538	0.347807	1.52785	1.08061	1.74233	0.889577	1.26883	0.657385	0.936556	0.869438	0.626679
ENSG00000279759.1_6	TEC	AC118344.2	0.65871	0.0114645	0.0336955	1	0.0494544	0.84335	0.923749	0	7.31363	3.29855	4.17335	5.8797	3.95435	2.28031	5.25564	4.82538	5.31648	1.53487	0.692245	0.875834	1.23393	0.829874	0.478553	1.10297	1.01267	1.11573
ENSG00000215717.6_4	protein_coding	TMEM167B	-0.0470941	0.557993	0.673428	0	0.144444	0.0800415	0.227691	0	24.5908	28.4875	23.615	26.9748	30.4431	29.1423	25.1809	28.8558	26.5327	5.37621	6.22813	5.16289	5.89742	6.65568	6.37129	5.50522	6.30866	5.80076
ENSG00000002079.14_3	transcribed_unitary_pseudogene	MYH16	0.967537	5.09317e-05	0.000391789	1	-0.0408631	0.843227	0.923738	0	3.70981	1.69925	1.57773	3.41112	2.16677	1.86985	3.75403	1.54412	2.08684	0.588206	0.269423	0.250155	0.540847	0.343549	0.296472	0.595216	0.244827	0.330877
ENSG00000113916.18_4	protein_coding	BCL6	0.254168	0.0153301	0.0423809	0	-0.0194374	0.843022	0.923725	0	17.1711	14.4936	16.2353	18.8958	14.084	13.089	17.153	15.4895	15.4526	2.89271	2.44165	2.73506	3.18326	2.37264	2.20501	2.88966	2.60941	2.60319
ENSG00000155099.8_5	protein_coding	PIP4P2	-0.948929	1.83358e-07	3.26269e-06	-1	-0.325356	0.00861069	0.0478434	0	5.9357	7.99648	10.2807	4.98203	9.80462	11.2647	5.65992	7.72061	10.3348	2.06963	2.78817	3.58462	1.73711	3.41863	3.92772	1.97347	2.69198	3.6035
ENSG00000134222.16_5	protein_coding	PSRC1	0.0113828	0.869829	0.911781	0	-0.0255753	0.713282	0.851711	0	46.9026	45.6799	46.2122	46.8132	43.3895	46.6094	43.0269	44.297	42.9293	16.4282	16	16.1864	16.3969	15.1977	16.3255	15.0707	15.5156	15.0365
ENSG00000072042.13_5	protein_coding	RDH11	-0.260589	0.000117729	0.000779331	0	-0.0106721	0.843136	0.923725	0	91.4204	109.602	110.746	92.3696	115.868	119.078	99.5106	111.322	109.36	16.6279	19.9348	20.143	16.8006	21.0745	21.6583	18.0994	20.2477	19.8909
ENSG00000143106.13_3	protein_coding	PSMA5	-0.134601	0.0504578	0.109778	0	-0.031677	0.627302	0.794994	0	139.33	159.08	151.818	142.684	158.336	172.072	154.088	150.841	154.625	24.2989	27.7433	26.4768	24.8838	27.6136	30.009	26.8728	26.3065	26.9663
ENSG00000143028.9_3	protein_coding	SYPL2	-0.639876	0.022697	0.0580232	0	0.160213	0.502306	0.705752	0	1.16594	1.64927	1.37415	1.39138	2.2751	2.37152	1.03958	2.41269	1.88809	0.288457	0.408034	0.339968	0.34423	0.562866	0.586719	0.257194	0.596905	0.467119
ENSG00000143303.12_6	protein_coding	RRNAD1	0.260697	0.014301	0.0401591	0	0.282592	0.0085899	0.0477507	0	19.079	18.3919	16.0827	19.2549	17.1175	15.5973	16.3445	20.0736	14.0613	6.02052	5.8037	5.07499	6.07601	5.40153	4.92183	5.15761	6.33436	4.43715
ENSG00000091436.17_3	protein_coding	MAP3K20	-0.455366	6.10421e-05	0.000454305	0	0.0175543	0.841834	0.923219	0	61.3709	92.1595	91.2029	65.6641	91.0584	91.7595	70.3447	90.6207	87.5479	4.44588	6.67629	6.60699	4.75689	6.59652	6.64731	5.09597	6.56481	6.34221
ENSG00000065135.11_4	protein_coding	GNAI3	-0.0619755	0.260863	0.38962	0	-0.107303	0.0595998	0.187249	0	149.717	148.235	160.928	159.38	159.257	171.479	162.521	149.587	159.842	5.50979	5.45522	5.92236	5.86539	5.86087	6.31064	5.98096	5.50498	5.88239
ENSG00000156966.7_3	protein_coding	B3GNT7	-0.278647	0.0224344	0.0575456	0	-0.329828	0.00857121	0.0476652	0	6.73066	6.54712	8.19401	7.54037	6.12111	8.9844	6.46848	7.38284	8.04924	1.84959	1.79915	2.25172	2.0721	1.68209	2.46892	1.77754	2.02881	2.21194
ENSG00000168765.17_3	protein_coding	GSTM4	0.0168841	0.863192	0.907001	0	-0.277896	0.0112524	0.0588132	0	13.0903	11.0951	11.2477	13.5547	10.6172	13.8186	13.6878	11.1466	14.7569	2.28572	1.93734	1.96397	2.36681	1.85388	2.41289	2.39004	1.94633	2.57673
ENSG00000213366.13_4	protein_coding	GSTM2	0.655814	0.0627423	0.130091	0	0.073108	0.837834	0.920725	0	2.49087	1.19947	0.865206	2.10951	1.24589	1.09455	1.67487	1.73714	2.03715	0.273242	0.131579	0.0949107	0.231407	0.136671	0.120069	0.183729	0.190559	0.22347
ENSG00000205542.11_3	protein_coding	TMSB4X	-0.207255	0.00226305	0.00903405	0	-0.0119106	0.840109	0.922369	0	116.011	136.79	137.212	116.876	134.285	143.066	118.454	131.202	125.26	68.1216	80.3229	80.5705	68.6294	78.8522	84.0084	69.5561	77.0418	73.5526
ENSG00000168710.18_4	protein_coding	AHCYL1	0.0712061	0.180297	0.295734	0	-0.118562	0.0324677	0.124019	0	168.744	154.282	162.71	173.653	156.441	171.844	185.507	152.048	167.792	33.5141	30.6419	32.3157	34.4892	31.0706	34.1299	36.8434	30.1982	33.3251
ENSG00000130303.13_4	protein_coding	BST2	2.26083	1.05651e-07	2.02746e-06	1	-0.0709878	0.839589	0.921938	0	4.08079	1.34941	1.01789	4.62297	0.595861	1.18576	4.62034	0.675554	0.546554	3.70644	1.22562	0.924514	4.19888	0.5412	1.07698	4.1965	0.613582	0.496416
ENSG00000258634.3_7	lncRNA	AL160006.1	0.0182777	0.863719	0.907149	0	0.160207	0.139634	0.325902	0	12.8254	14.8435	14.0978	14.7666	15.2757	11.2191	13.5723	15.393	15.5022	3.04207	3.52075	3.34387	3.50251	3.62327	2.66108	3.21923	3.65108	3.677
ENSG00000138629.16_4	protein_coding	UBL7	-0.266399	0.00284294	0.0109026	0	0.0157968	0.838292	0.920864	0	43.9348	50.4778	49.1641	37.4775	47.398	51.6717	40.1392	49.7497	45.1652	23.3076	26.7787	26.0817	19.8819	25.1448	27.4121	21.294	26.3924	23.9603
ENSG00000033170.16_3	protein_coding	FUT8	-0.585029	1.48295e-07	2.69527e-06	-1	-0.0143257	0.83724	0.92048	0	20.563	33.1354	32.0126	22.4865	32.4473	35.1167	21.8311	30.8824	30.2095	3.0691	4.94559	4.778	3.35619	4.84288	5.2413	3.25838	4.60932	4.50888
ENSG00000137312.15_4	protein_coding	FLOT1	0.690235	1.02566e-08	2.85189e-07	1	0.0148235	0.837076	0.92048	0	182.841	114.1	111.154	171.364	110.613	106.308	170.953	104.132	108.019	57.4068	35.8241	34.8991	53.8035	34.7295	33.3777	53.6743	32.6944	33.9149
ENSG00000224699.9_5	lncRNA	LAMTOR5-AS1	0.57578	0.0261247	0.0648183	0	0.2246	0.373562	0.595756	0	2.43788	2.09908	1.17057	2.60322	1.95009	1.4594	2.6567	1.97841	2.53402	0.192657	0.165882	0.0925062	0.205723	0.154109	0.115331	0.209949	0.156346	0.200255
ENSG00000087086.15_4	protein_coding	FTL	0.724853	5.01543e-10	2.04457e-08	1	0.0128326	0.835656	0.91987	0	2214.71	1296.63	1324.17	2045.33	1287.22	1311.49	2119.18	1310.38	1224.08	2542.72	1488.67	1520.29	2348.25	1477.87	1505.73	2433.04	1504.46	1405.37
ENSG00000134248.13_3	protein_coding	LAMTOR5	0.00422828	0.952204	0.968171	0	0.074329	0.29759	0.520737	0	55.3292	58.8241	52.8794	54.8921	60.2361	58.467	57.6965	57.1808	55.9472	23.1697	24.6332	22.1438	22.9867	25.2245	24.4837	24.161	23.9451	23.4285
ENSG00000121931.16_4	protein_coding	LRIF1	-0.0126729	0.872801	0.91357	0	0.0793462	0.319323	0.543735	0	27.3996	30.1367	28.6536	24.7306	29.468	26.4515	28.5884	26.2983	26.1849	7.82399	8.60558	8.18206	7.06186	8.41463	7.55327	8.16344	7.50952	7.47712
ENSG00000156171.14_2	protein_coding	DRAM2	0.0879246	0.339434	0.472816	0	-0.00121664	0.989357	0.995574	0	22.8419	22.2402	20.5105	24.6409	20.9093	25.1746	24.6611	24.6095	22.1106	7.27911	7.08739	6.53616	7.85241	6.66326	8.02249	7.85885	7.8424	7.04607
ENSG00000134255.14_3	protein_coding	CEPT1	0.0810007	0.255615	0.383808	0	0.0305012	0.664098	0.819741	0	39.483	37.6334	36.9494	37.8365	39.9768	38.7196	39.6772	35.3701	34.8304	4.69031	4.47059	4.38933	4.49472	4.74897	4.59962	4.71338	4.20172	4.13761
ENSG00000085999.13_5	protein_coding	RAD54L	0.207246	0.00504903	0.0174438	0	-0.0139101	0.834502	0.91915	0	48.5456	39.1828	38.0691	46.6336	40.7894	42.6873	46.9542	41.9326	42.2834	11.9043	9.60833	9.33523	11.4354	10.0023	10.4677	11.514	10.2826	10.3687
ENSG00000173947.14_4	protein_coding	PIFO	-0.33998	0.303389	0.435169	0	0.366178	0.225436	0.439615	0	0.635968	1.24945	1.01789	0.448832	1.02921	0.866516	1.21284	1.35111	0.944047	0.161045	0.316397	0.257759	0.113657	0.260626	0.219427	0.307126	0.342139	0.23906
ENSG00000085465.12_2	protein_coding	OVGP1	0.215939	0.271857	0.401635	0	-0.206818	0.310687	0.535027	0	3.76281	2.84875	4.02066	4.66785	2.9793	2.64515	3.86954	3.37777	4.02462	1.46584	1.10976	1.56629	1.81841	1.16062	1.03045	1.50742	1.31584	1.56783
ENSG00000260948.1_6	lncRNA	AL390195.2	0.473274	0.0428277	0.0965246	0	0.329257	0.151801	0.343237	0	2.27889	2.0491	2.03578	2.87252	2.16677	1.77864	2.88771	3.03999	1.98747	1.12649	1.0129	1.00632	1.41993	1.07107	0.879208	1.42744	1.50271	0.982436
ENSG00000233337.1_4	processed_pseudogene	UBE2FP3	0.794162	0.0556365	0.11863	0	0.331078	0.430108	0.646349	0	1.16594	0.49978	0.763417	1.25673	1.35423	0.592879	1.67487	1.10984	0.993734	2.22508	0.953779	1.4569	2.39834	2.58441	1.13145	3.19632	2.11801	1.89644
ENSG00000243960.1_7	lncRNA	AL390195.1	0.329267	0.313867	0.446275	0	0.415851	0.200633	0.407393	0	0.741963	0.649714	0.763417	0.763014	0.920876	0.547273	1.09733	1.15809	0.7453	0.861745	0.754604	0.886663	0.886195	1.06954	0.635625	1.27448	1.34505	0.865622
ENSG00000145022.4_2	protein_coding	TCTA	0.256598	0.00482605	0.0168062	0	0.017204	0.83432	0.919019	0	25.1207	22.84	22.0882	26.7504	21.8302	23.5784	27.2023	22.2933	20.4709	9.14479	8.31451	8.04085	9.73803	7.94691	8.58331	9.90254	8.1155	7.4521
ENSG00000116459.11_4	protein_coding	ATP5PB	-0.130489	0.0255686	0.0637934	0	-0.0892443	0.113229	0.285681	0	213.42	228.549	236.201	210.233	225.994	247.596	222.065	209.856	222.894	68.0116	72.8328	75.2713	66.9958	72.0184	78.9023	70.7665	66.8757	71.0307
ENSG00000116473.14_2	protein_coding	RAP1A	-0.111239	0.130314	0.230801	0	0.0787956	0.271337	0.491671	0	31.3744	39.2327	33.6921	34.8742	39.5435	38.0811	35.2879	37.1072	37.8613	5.67144	7.09196	6.09041	6.30409	7.14814	6.88378	6.37886	6.70774	6.84404
ENSG00000176248.9_3	protein_coding	ANAPC2	0.1716	0.0179498	0.0481834	0	-0.0140752	0.834241	0.919002	0	89.5655	74.5172	82.3982	93.5366	76.8119	73.4714	82.8774	82.6588	80.5421	16.4099	13.6528	15.0968	17.1375	14.0733	13.4612	15.1846	15.1445	14.7567
ENSG00000064703.12_3	protein_coding	DDX20	-0.143168	0.0547541	0.117069	0	-0.0137389	0.845063	0.924642	0	43.6168	48.5786	47.7899	44.7934	53.1941	53.6328	50.4772	50.0392	51.7238	7.80963	8.69805	8.55683	8.02031	9.52446	9.603	9.038	8.95957	9.26121
ENSG00000127666.9_2	protein_coding	TICAM1	-0.231841	0.0134232	0.0381614	0	-0.0178085	0.833702	0.918619	0	31.6924	34.135	34.6082	28.1418	33.314	34.9343	28.7616	35.2253	34.4329	11.8432	12.756	12.9328	10.5164	12.4492	13.0547	10.748	13.1634	12.8673
ENSG00000087274.17_6	protein_coding	ADD1	-0.34265	9.49801e-07	1.29797e-05	0	-0.0100844	0.833466	0.918429	0	143.146	179.271	176.706	135.502	175.833	182.561	142.076	174.582	174.102	10.8222	13.5534	13.3595	10.2444	13.2935	13.8022	10.7413	13.1989	13.1626
ENSG00000164466.13_6	protein_coding	SFXN1	-0.257673	2.03301e-05	0.000180655	0	-0.00966827	0.832903	0.918229	0	166.518	199.562	206.886	171.095	204.922	202.765	171.299	199.916	198.796	22.4811	26.9424	27.9312	23.0991	27.666	27.3747	23.1267	26.9901	26.839
ENSG00000257815.6_8	lncRNA	AC025159.1	0.759181	0.011157	0.0330337	1	0.0627178	0.832534	0.918104	0	1.37793	0.699692	0.763417	1.39138	1.08338	0.957728	1.61712	0.916823	0.844674	0.173194	0.0879452	0.0959549	0.174884	0.136172	0.120378	0.203258	0.115237	0.106168
ENSG00000116489.13_3	protein_coding	CAPZA1	-0.0982566	0.0665261	0.136561	0	-0.0429451	0.404391	0.624442	0	209.604	218.204	222.053	208.034	226.21	237.973	215.423	213.378	217.528	59.9727	62.4332	63.5344	59.5232	64.724	68.0895	61.6376	61.0525	62.2399
ENSG00000143093.15_4	protein_coding	STRIP1	-0.156386	0.0184164	0.0491614	0	-0.0129603	0.831403	0.917521	0	46.7436	50.9776	49.9275	44.3895	48.2647	50.486	45.2794	51.3421	51.5748	6.36488	6.94139	6.7984	6.04432	6.57199	6.87445	6.16549	6.99102	7.02271
ENSG00000135549.10	protein_coding	PKIB	-1.46301	2.10787e-06	2.56914e-05	-1	0.039329	0.831334	0.917521	0	1.00695	3.24857	2.64651	0.897664	3.19598	3.14682	1.3861	2.79872	3.17995	0.307936	0.993447	0.809331	0.274515	0.977364	0.962331	0.423885	0.855878	0.972461
ENSG00000155367.15_3	protein_coding	PPM1J	-0.422772	0.0824786	0.161521	0	-0.137984	0.543779	0.73718	0	2.96785	2.44892	2.7483	3.00717	3.41266	4.19576	2.36793	4.34284	4.27305	1.03266	0.852096	0.956264	1.04634	1.18742	1.4599	0.823913	1.51108	1.4868
ENSG00000155380.11_6	protein_coding	SLC16A1	0.10033	0.0473087	0.104358	0	-0.0775214	0.118147	0.292964	0	183.318	161.679	171.82	181.104	169.279	175.31	191.051	160.058	170.922	34.5101	30.4365	32.3456	34.0933	31.8672	33.0026	35.966	30.1314	32.1766
ENSG00000226419.8_6	lncRNA	SLC16A1-AS1	-0.0589628	0.73188	0.811257	0	-0.128732	0.459552	0.671302	0	2.96785	2.44892	3.35904	3.81507	3.57516	3.28364	3.00322	3.37777	3.62713	0.234113	0.193178	0.264971	0.300944	0.28202	0.259023	0.236903	0.266449	0.286119
ENSG00000198799.12_4	protein_coding	LRIG2	-0.0417413	0.655175	0.753193	0	-0.0256997	0.782453	0.892756	0	25.4917	23.5896	26.3633	25.7629	22.9136	22.6206	22.8707	28.4698	27.5264	2.04474	1.89217	2.11465	2.06649	1.83794	1.81444	1.8345	2.28361	2.20794
ENSG00000112297.15_7	protein_coding	CRYBG1	-0.791575	4.6714e-08	1.01679e-06	-1	-0.0182985	0.831561	0.917521	0	17.7541	35.6343	31.5037	19.3895	30.7681	31.8787	19.0012	29.6279	33.8863	1.63617	3.28397	2.9033	1.78689	2.83551	2.93786	1.7511	2.73043	3.12288
ENSG00000116151.14_6	protein_coding	MORN1	0.376662	0.000585154	0.0029867	0	0.269111	0.00856315	0.0476387	0	11.0234	10.5454	8.85564	11.3106	10.0213	8.75637	11.7819	11.0501	8.64548	0.972342	0.930172	0.781127	0.997668	0.883946	0.772371	1.03924	0.974696	0.76259
ENSG00000081019.13_5	protein_coding	RSBN1	-0.0137548	0.860702	0.905503	0	0.084476	0.285275	0.507506	0	26.9226	28.6874	27.5848	28.1866	28.2221	25.9499	25.9317	29.9174	28.4208	3.94818	4.20698	4.04529	4.13354	4.13875	3.80552	3.80286	4.38735	4.16788
ENSG00000188761.13_4	protein_coding	BCL2L15	-0.568086	0.128473	0.228571	0	0.615292	0.0605456	0.189325	0	0.635968	1.54932	0.916101	0.85278	2.1126	0.82091	0.577543	1.15809	1.39123	0.069925	0.170348	0.100726	0.0937637	0.232281	0.0902595	0.0635011	0.127333	0.152966
ENSG00000134262.13_3	protein_coding	AP4B1	-0.185959	0.0278429	0.06838	0	-0.123429	0.127635	0.307291	0	13.1963	14.6935	15.4719	14.228	14.8965	16.4182	14.3808	14.0901	15.6513	2.25694	2.513	2.64613	2.43338	2.54772	2.80797	2.45952	2.4098	2.67681
ENSG00000118655.7_5	protein_coding	DCLRE1B	-0.0423174	0.585587	0.695295	0	0.0625255	0.419418	0.637118	0	28.3536	32.8356	32.7251	30.4308	34.3432	31.377	34.9991	33.5364	32.346	7.33029	8.48903	8.46048	7.86732	8.87881	8.11194	9.04837	8.67022	8.36247
ENSG00000163349.22_6	protein_coding	HIPK1	0.127461	0.156267	0.265738	0	0.0717977	0.415899	0.633925	0	106.949	109.652	102.552	111.176	103.301	98.2355	115.797	108.233	104.889	11.6909	11.9864	11.2104	12.153	11.2921	10.7385	12.6582	11.8314	11.4657
ENSG00000197323.12_4	protein_coding	TRIM33	0.0455284	0.597323	0.705745	0	0.0584797	0.498071	0.702613	0	88.7705	89.6106	91.152	95.4665	97.6128	85.9219	98.9908	98.5343	97.3859	9.24308	9.33055	9.49105	9.94029	10.1638	8.94647	10.3073	10.2597	10.1401
ENSG00000116752.6_3	protein_coding	BCAS2	-0.0259301	0.652114	0.750402	0	-0.0454915	0.431547	0.647297	0	50.0825	52.1271	52.5231	52.9173	53.1941	53.496	53.6537	49.2672	53.4629	38.8537	40.4399	40.7472	41.053	41.2677	41.5019	41.6243	38.2212	41.4762
ENSG00000175984.15_4	protein_coding	DENND2C	-0.0965615	0.573197	0.68549	0	0.371319	0.0331195	0.125743	0	4.87575	7.24681	4.83498	5.47575	8.23371	5.47273	5.31339	6.273	6.45927	0.65773	0.977582	0.652229	0.738668	1.11071	0.738262	0.716767	0.846216	0.871343
ENSG00000188483.7_2	protein_coding	IER5L	0.273501	0.00210723	0.00852283	0	0.0166771	0.83056	0.917117	0	123.696	110.202	100.924	118.357	90.3	99.8318	114.758	98.0518	94.4544	45.6274	40.6498	37.2275	43.658	33.3087	36.8247	42.3304	36.1681	34.8412
ENSG00000009307.16_7	protein_coding	CSDE1	-0.105808	0.0789714	0.156093	0	-0.032866	0.570299	0.756085	0	775.245	854.674	844.848	795.195	846.122	888.224	829.756	823.838	849.692	134.172	147.919	146.218	137.625	146.439	153.725	143.606	142.582	147.056
ENSG00000052723.11_3	protein_coding	SIKE1	0.177211	0.0228389	0.0583134	0	0.103432	0.1645	0.361257	0	69.3205	66.3708	65.1958	70.0178	70.0407	64.6238	71.2688	63.7433	56.3944	11.7612	11.2607	11.0614	11.8795	11.8834	10.9643	12.0918	10.8149	9.5681
ENSG00000173218.15_3	protein_coding	VANGL1	0.0722797	0.27321	0.402927	0	0.172654	0.0142884	0.0698023	0	94.3883	108.252	93.8494	93.6712	100.213	85.4202	98.5288	98.6791	93.3116	10.4354	11.9682	10.3758	10.3561	11.0794	9.44392	10.8932	10.9098	10.3164
ENSG00000159346.13_4	protein_coding	ADIPOR1	-0.226855	0.000704619	0.00348112	0	0.0122316	0.828137	0.915077	0	126.187	157.231	152.836	129.308	153.245	154.559	128.734	143.073	142.253	40.5354	50.5078	49.0961	41.5382	49.2273	49.6496	41.3538	45.9597	45.6964
ENSG00000147905.17_2	protein_coding	ZCCHC7	-0.30726	0.000524382	0.00272305	0	-0.0159119	0.82732	0.9148	0	27.3466	30.0368	32.5216	25.8527	34.7766	35.0711	26.2782	32.4748	30.6567	6.85036	7.52425	8.14669	6.47613	8.71157	8.78534	6.58271	8.13498	7.67953
ENSG00000132563.16_4	protein_coding	REEP2	-1.15265	8.58804e-06	8.6305e-05	-1	0.0369432	0.825432	0.913903	0	1.27194	2.59886	2.95188	1.30161	3.25015	2.87318	1.21284	2.84698	2.63339	0.392089	0.801127	0.909951	0.401237	1.0019	0.885692	0.373872	0.877613	0.811774
ENSG00000089041.17_4	protein_coding	P2RX7	-1.77067	6.15396e-05	0.000457065	-1	-0.890506	0.00856124	0.0476387	-1	0.423979	0.74967	1.73041	0.493715	0.595861	1.27697	0.288771	0.916823	1.24217	0.0764476	0.135173	0.312011	0.0890218	0.10744	0.230251	0.0520684	0.165312	0.223975
ENSG00000167702.12_3	protein_coding	KIFC2	0.363505	0.0158797	0.0436245	0	0.0309944	0.824897	0.913451	0	85.9617	47.3292	58.0197	82.226	66.0864	53.5872	63.472	70.8366	68.8161	19.3303	10.6429	13.0469	18.4902	14.8609	12.0502	14.273	15.9291	15.4747
ENSG00000063322.14_4	protein_coding	MED29	0.298154	0.000107654	0.000723183	0	-0.0137945	0.824508	0.913259	0	68.8965	55.9754	56.7982	62.4325	52.2191	54.1801	71.6731	55.1059	53.9597	17.9652	14.5959	14.8105	16.2797	13.6164	14.1278	18.6892	14.3692	14.0703
ENSG00000134256.12_2	protein_coding	CD101	0.0886642	0.616245	0.721134	0	-0.040038	0.822526	0.912365	0	2.49087	2.34897	2.49383	3.23159	2.76263	2.73637	2.48343	2.46095	2.53402	0.650699	0.613628	0.651471	0.844198	0.721689	0.714829	0.648755	0.64288	0.66197
ENSG00000236137.1_6	lncRNA	AL445231.1	-0.38413	0.297826	0.429749	0	-0.430264	0.246936	0.46358	0	0.900955	0.899604	1.37415	0.897664	0.541692	0.684092	0.519789	0.820315	1.04342	0.462978	0.462284	0.706141	0.461287	0.278362	0.351537	0.267106	0.421539	0.536187
ENSG00000152683.14_4	protein_coding	SLC30A6	0.0261055	0.699412	0.786618	0	0.194748	0.00854944	0.0475992	0	65.3457	75.1669	62.9565	63.1058	72.2075	67.1322	66.5907	71.7534	61.3134	12.0787	13.8941	11.6371	11.6646	13.347	12.4089	12.3088	13.2631	11.3333
ENSG00000134253.10_6	protein_coding	TRIM45	-0.0838468	0.621963	0.726119	0	-0.0212577	0.899486	0.952417	0	4.82276	3.89829	4.27514	4.8025	5.47108	5.15349	3.58077	4.53586	4.62086	1.10411	0.892465	0.97874	1.09947	1.25254	1.17983	0.819772	1.03843	1.05789
ENSG00000198162.12_4	protein_coding	MAN1A2	-0.0857906	0.291365	0.422656	0	-0.00060308	0.993969	0.997469	0	71.3874	83.2134	83.6705	77.1991	81.7954	75.8886	80.856	78.3642	83.9705	7.38465	8.60799	8.65527	7.98584	8.4613	7.85027	8.36412	8.10636	8.6863
ENSG00000183508.5_4	protein_coding	TENT5C	0.124632	0.402226	0.532588	0	-0.104763	0.488865	0.695329	0	3.55082	3.34853	3.25725	4.35367	3.35849	3.7397	3.69627	3.23301	3.67681	0.628019	0.59224	0.576096	0.770016	0.594002	0.661426	0.653745	0.571809	0.650303
ENSG00000196505.11_3	protein_coding	GDAP2	-0.0856236	0.301078	0.432797	0	-0.0493862	0.545332	0.738591	0	28.4066	28.6874	29.0099	25.7629	28.0596	28.4582	29.3392	28.711	31.0045	2.70874	2.73552	2.76627	2.45666	2.67566	2.71367	2.79767	2.73777	2.95647
ENSG00000106348.18_7	protein_coding	IMPDH1	-0.268152	0.000222814	0.0013295	0	-0.0131195	0.824135	0.913097	0	112.248	124.795	130.799	105.745	130.331	123.821	101.994	126.811	130.825	30.6522	34.0784	35.7179	28.8762	35.5901	33.8123	27.852	34.6289	35.725
ENSG00000116874.11_3	protein_coding	WARS2	0.135155	0.334202	0.467151	0	0.0820477	0.555512	0.745691	0	7.36663	6.29723	5.44571	7.18131	5.95861	5.92879	6.0642	7.6241	7.453	1.9149	1.63692	1.41557	1.86673	1.5489	1.54115	1.57635	1.98183	1.93735
ENSG00000231365.6_7	lncRNA	WARS2-AS1	0.108652	0.322948	0.455568	0	0.1878	0.0933876	0.252091	0	12.6664	13.2442	12.9272	12.1633	12.5672	10.2614	11.5509	12.6425	10.633	1.1044	1.15478	1.12714	1.06054	1.09576	0.894705	1.00714	1.10232	0.927104
ENSG00000143067.5_3	protein_coding	ZNF697	-0.0995633	0.320455	0.453254	0	-0.0872381	0.381225	0.604423	0	13.1433	11.4949	12.7236	11.894	13.434	12.8153	11.4931	11.9669	13.6142	2.35586	2.06039	2.28063	2.13193	2.40795	2.29706	2.06006	2.145	2.44025
ENSG00000110711.10_6	protein_coding	AIP	0.244345	0.00943904	0.0288224	0	0.0192512	0.823409	0.912643	0	46.7436	42.2814	37.8655	43.7611	38.1893	38.5372	45.3371	35.7078	38.2091	28.2439	25.5477	22.8794	26.4418	23.0751	23.2853	27.394	21.5757	23.087
ENSG00000177084.16_4	protein_coding	POLE	0.196847	0.0180043	0.0482846	0	0.0172103	0.82305	0.912465	0	264.669	220.503	241.545	278.635	228.702	200.028	253.946	254.78	254.296	15.9353	13.2761	14.543	16.7761	13.7698	12.0434	15.2896	15.3399	15.3108
ENSG00000273131.1	processed_transcript	RP6-42F4.1	0.486306	0.0897349	0.17257	0	0.355061	0.212143	0.423258	0	1.9079	2.14905	0.865206	2.82764	1.89592	1.73303	2.36793	2.46095	2.48433	0.498538	0.561551	0.226079	0.738866	0.495406	0.452843	0.618742	0.643048	0.64916
ENSG00000158805.12_4	protein_coding	ZNF276	0.250302	0.0117389	0.0343638	0	-0.020575	0.822532	0.912365	0	49.3935	36.6839	41.7335	52.6929	38.4601	37.5338	42.0451	44.49	42.2337	6.62467	4.92005	5.5973	7.06718	5.15828	5.03404	5.6391	5.96701	5.66439
ENSG00000171943.7	pseudogene	SRGAP2C	0.00078963	0.996647	0.997787	0	0.184903	0.326397	0.551138	0	1.9609	2.09908	1.8831	2.19928	2.2751	2.09788	1.73263	2.36444	1.93778	2.02363	2.16623	1.94334	2.26963	2.34789	2.165	1.78806	2.44008	1.99977
ENSG00000269996.1	lincRNA	RP11-343N15.5	0.0810953	0.538729	0.657393	0	0.165355	0.213082	0.424154	0	6.0417	5.34765	5.14034	5.38598	7.09616	5.33591	6.00645	6.03173	5.9624	4.55633	4.03292	3.87658	4.06183	5.35155	4.02407	4.52975	4.54881	4.49653
ENSG00000231752.6_3	transcribed_unprocessed_pseudogene	EMBP1	-0.887612	0.027689	0.0680715	0	0.217241	0.502888	0.7063	0	0.370981	0.699692	1.17057	0.448832	1.19172	0.638485	0.519789	1.01333	0.695614	0.0645746	0.121792	0.203755	0.0781256	0.207436	0.111138	0.0904767	0.176385	0.121082
ENSG00000215784.6_3	protein_coding	FAM72D	0.0263779	0.815065	0.872704	0	0.0244402	0.828067	0.915077	0	7.68461	6.99692	6.56539	7.13643	7.58368	8.2091	7.27704	7.47934	6.85676	3.17153	2.88771	2.70961	2.94529	3.12987	3.38799	3.00332	3.08681	2.82986
ENSG00000125746.16_7	protein_coding	EML2	-0.215973	0.00250207	0.00978519	0	0.0139103	0.822445	0.912365	0	50.6655	60.5734	58.0197	51.0322	56.3901	56.4148	46.6077	57.0843	57.9844	6.16068	7.36544	7.05492	6.20527	6.85677	6.85977	5.66728	6.94118	7.05063
ENSG00000225241.3	pseudogene	RP11-640M9.2	-0.0644762	0.605536	0.712171	0	-0.223814	0.0873899	0.240489	0	16.2702	10.9952	14.0978	12.1185	11.5922	13.7274	11.7819	13.3181	14.1607	2.10508	1.42259	1.82401	1.56792	1.49983	1.77609	1.52437	1.72313	1.83215
ENSG00000168614.13	protein_coding	NBPF9	0.203518	0.107918	0.198922	0	0.17461	0.164328	0.361001	0	9.9635	9.29591	7.83775	10.1885	8.28788	8.16349	7.10378	9.26473	7.80081	1.35983	1.26872	1.06971	1.39054	1.13114	1.11417	0.969534	1.26446	1.06467
ENSG00000178104.19_4	protein_coding	PDE4DIP	0.0856155	0.326725	0.45958	0	0.183762	0.0425618	0.149225	0	21.6759	24.939	21.8337	21.9928	22.751	19.1546	22.1776	22.7758	21.1168	0.785103	0.903293	0.790819	0.796579	0.824045	0.69378	0.803276	0.824941	0.764853
ENSG00000265808.3_1	protein_coding	SEC22B	-0.057776	0.447287	0.575499	0	-0.0224651	0.765433	0.882992	0	38.794	42.5313	43.7692	45.2871	43.7687	46.655	46.55	47.53	45.513	7.60966	8.34274	8.58557	8.88331	8.58546	9.15164	9.13102	9.32327	8.92762
ENSG00000264343.6_5	protein_coding	NOTCH2NLA	-0.373608	0.2736	0.403043	0	-0.17338	0.597457	0.773681	0	0.847957	1.19947	1.57773	1.57091	1.51674	1.23136	1.3861	1.68888	2.18621	0.28686	0.405775	0.533738	0.531431	0.513104	0.416565	0.468912	0.571341	0.739585
ENSG00000286219.1_1	protein_coding	AC242843.1	-0.158139	0.532005	0.651839	0	-0.699534	0.0162681	0.0763615	0	1.48393	0.949582	1.78131	1.25673	0.758368	1.27697	1.32835	1.06158	1.4906	0.2857	0.182823	0.342955	0.241958	0.146009	0.245855	0.255747	0.204387	0.286985
ENSG00000271425.8_2	protein_coding	NBPF10	-0.14863	0.55415	0.670614	0	-0.232028	0.362667	0.585288	0	1.58992	1.5993	1.78131	1.97486	1.73341	1.4594	1.44386	1.44761	2.38496	0.367782	0.369951	0.412053	0.456826	0.400975	0.337589	0.333994	0.334863	0.551691
ENSG00000233396.8_5	lncRNA	LINC01719	0.480956	0.0224863	0.0576446	0	0.381716	0.0650187	0.198285	0	4.0278	2.89872	3.10456	3.90484	4.33353	2.05227	3.92729	3.86031	3.37869	0.874847	0.62961	0.674319	0.84814	0.941254	0.445759	0.853017	0.838468	0.733861
ENSG00000121851.13_4	protein_coding	POLR3GL	0.0242504	0.830995	0.884764	0	0.139923	0.222211	0.435461	0	11.5534	12.0447	9.66995	9.96407	12.2964	11.3559	10.6268	10.4711	10.4839	6.37958	6.65086	5.33956	5.50197	6.78984	6.27052	5.86791	5.78193	5.78901
ENSG00000272031.3_4	protein_coding	ANKRD34A	0.22391	0.362026	0.494688	0	-0.0480266	0.847531	0.926418	0	1.74891	1.5993	1.8322	1.88509	1.57091	1.23136	2.13691	1.59238	1.88809	0.476803	0.436013	0.49951	0.51393	0.428273	0.335705	0.582581	0.434127	0.514748
ENSG00000164180.13_3	protein_coding	TMEM161B	0.321186	0.00692734	0.0223793	0	-0.0246041	0.821745	0.91206	0	27.8766	20.1411	20.3578	32.0466	24.8095	23.852	28.4729	24.7542	26.6321	2.90442	2.09847	2.12104	3.33888	2.58486	2.4851	2.96654	2.5791	2.77475
ENSG00000135722.9_4	protein_coding	FBXL8	0.750776	0.000464826	0.00246252	1	-0.0432184	0.821717	0.91206	0	9.22154	3.49846	4.78408	10.0987	5.30858	5.06228	7.04602	6.46601	5.91272	2.94712	1.11808	1.52895	3.22746	1.69657	1.61786	2.25184	2.06648	1.88965
ENSG00000131779.11_4	protein_coding	PEX11B	0.191097	0.0297223	0.0720635	0	-0.0066345	0.936366	0.969895	0	22.0469	16.8926	17.9657	19.3447	18.3633	19.5194	21.8889	19.7841	17.7878	12.8329	9.83269	10.4574	11.26	10.6888	11.3617	12.7409	11.5158	10.3538
ENSG00000143127.13_3	protein_coding	ITGA10	-0.473209	0.0672496	0.137696	0	-0.157141	0.511797	0.714001	0	2.22589	1.54932	2.44293	1.88509	3.14181	2.55394	1.50161	2.36444	2.83214	0.356599	0.248209	0.391371	0.302002	0.503334	0.409154	0.240566	0.378795	0.453723
ENSG00000131788.16_4	protein_coding	PIAS3	-0.103623	0.150158	0.257539	0	0.11112	0.120288	0.296073	0	34.4483	36.8338	36.4913	36.7144	41.2227	38.6284	33.0932	43.0907	37.0166	7.16776	7.66413	7.59287	7.63929	8.57735	8.03753	6.88581	8.96602	7.70216
ENSG00000186364.12_3	protein_coding	NUDT17	0.22581	0.23776	0.36389	0	0.0469902	0.805278	0.90506	0	4.18679	2.84875	3.35904	3.9946	3.30432	2.55394	3.11873	3.86031	3.82587	2.52673	1.71922	2.02718	2.41074	1.99416	1.5413	1.88216	2.3297	2.30892
ENSG00000186141.9_3	protein_coding	POLR3C	-0.0764094	0.236258	0.36226	0	-0.0739563	0.250485	0.467868	0	39.377	37.2336	42.1406	40.4397	39.1643	39.0388	37.3093	41.0158	42.4821	8.39595	7.93894	8.98521	8.62255	8.3506	8.32384	7.95507	8.74536	9.05802
ENSG00000170571.12_4	protein_coding	EMB	-4.02505	1.84965e-16	6.51033e-14	-1	0.0215223	0.82169	0.91206	0	1.64292	22.8899	22.5971	1.0772	24.7553	24.9465	1.50161	21.5212	20.4709	0.313534	4.36831	4.31243	0.205572	4.72429	4.76079	0.286567	4.1071	3.90666
ENSG00000117281.15_3	protein_coding	CD160	0.474616	0.260828	0.389609	0	0.0193842	0.964612	0.984833	0	1.27194	0.449802	0.916101	1.0772	0.704199	0.273637	0.981823	1.2546	1.24217	0.320306	0.113272	0.230698	0.271266	0.177335	0.0689087	0.247248	0.31594	0.31281
ENSG00000117262.19_3	protein_coding	GPR89A	0.0871873	0.564618	0.678717	0	-0.00466097	0.975471	0.989921	0	4.39878	3.54844	3.96977	4.17414	4.00852	4.24137	4.6781	4.82538	4.22337	0.791005	0.638094	0.713859	0.750609	0.720827	0.762699	0.841233	0.867719	0.759462
ENSG00000232637.3	pseudogene	WI2-3658N16.1	0.406443	0.245611	0.372901	0	0.756579	0.0304144	0.118849	0	1.05995	1.04954	0.559839	0.583481	0.975045	0.501667	0.635297	0.868569	0.645927	0.160282	0.158708	0.0846574	0.0882325	0.147444	0.0758608	0.0960679	0.131343	0.0976753
ENSG00000186275.7	protein_coding	NBPF12	0.203438	0.209706	0.332083	0	0.0555431	0.729643	0.862718	0	5.67071	5.84743	4.22424	6.37341	4.3877	4.56061	5.31339	5.45268	6.3599	0.434438	0.447976	0.323622	0.488272	0.336145	0.349392	0.407063	0.417734	0.487236
ENSG00000131791.8_3	protein_coding	PRKAB2	0.127635	0.154833	0.263833	0	0.151073	0.0949177	0.254602	0	35.0312	34.8347	31.3001	34.6498	35.1016	31.2858	35.4034	36.8177	33.5882	6.41598	6.37998	5.73262	6.34612	6.42887	5.73	6.48413	6.74316	6.15168
ENSG00000180867.11_3	transcribed_processed_pseudogene	PDIA3P1	-0.292342	0.106492	0.196949	0	-0.260113	0.145905	0.334428	0	3.60382	4.04822	4.07156	3.81507	2.92513	3.83091	3.06098	3.7638	5.01835	1.08288	1.21641	1.22342	1.14636	0.878947	1.15112	0.919765	1.13095	1.50792
ENSG00000271721.1	antisense	RP11-337C18.9	-0.512814	0.0933336	0.177691	0	-0.255541	0.372183	0.594199	0	0.953952	1.34941	1.11968	0.718131	0.866707	1.09455	0.750806	0.675554	1.24217	0.44598	0.630859	0.523459	0.335732	0.405192	0.511709	0.351008	0.315827	0.580723
ENSG00000136868.11_3	protein_coding	SLC31A1	0.0366328	0.564347	0.678464	0	0.182843	0.00852954	0.0475067	0	67.8366	73.8175	64.0252	69.2996	77.5702	72.012	71.7886	79.7636	67.5242	13.185	14.3474	12.4442	13.4693	15.0768	13.9965	13.9531	15.5031	13.1242
ENSG00000278811.4_5	lncRNA	LINC00624	0.261656	0.47387	0.599752	0	-0.182675	0.633118	0.798523	0	1.69591	0.849626	1.22147	0.897664	1.35423	1.04894	1.55937	0.820315	1.14279	0.304801	0.152701	0.21953	0.161334	0.243391	0.188523	0.28026	0.147433	0.205391
ENSG00000123983.14_3	protein_coding	ACSL3	-0.188429	0.00196683	0.0080543	0	-0.0119423	0.821355	0.911958	0	250.571	290.772	290.099	254.353	299.501	296.622	263.533	278.183	288.878	34.6476	40.2063	40.1132	35.1705	41.4133	41.0152	36.4398	38.4656	39.9445
ENSG00000163714.17_6	protein_coding	U2SURP	0.0168935	0.805455	0.865231	0	-0.199551	0.00851684	0.0474543	0	276.646	238.595	291.88	307.854	273.717	298.446	312.508	259.799	296.232	24.8827	21.4602	26.2529	27.6897	24.6192	26.8435	28.1083	23.3674	26.6444
ENSG00000113593.12_3	protein_coding	PPWD1	0.190015	0.0117599	0.0343886	0	0.0157087	0.820977	0.911918	0	38.6881	32.1858	33.8957	37.2082	35.3725	31.2858	38.2333	33.5847	34.8801	10.2431	8.52154	8.97424	9.85125	9.36523	8.28324	10.1227	8.89189	9.23486
ENSG00000100749.8_4	protein_coding	VRK1	-0.181582	0.0156332	0.0430622	0	-0.015565	0.82035	0.911785	0	38.1051	43.8307	43.0058	42.0107	47.6147	49.3914	43.72	47.4818	47.9476	14.3145	16.4653	16.1555	15.7816	17.8868	18.5542	16.4237	17.8369	18.0119
ENSG00000122497.13	protein_coding	NBPF14	-0.139531	0.243001	0.370066	0	-0.0534505	0.64644	0.807975	0	8.90355	8.04646	9.2119	8.21362	9.15459	7.98107	7.10378	8.58918	9.58953	2.40377	2.17237	2.48701	2.2175	2.47154	2.15472	1.91787	2.31889	2.58897
ENSG00000223612.3_5	processed_pseudogene	AC241585.1	-0.395316	0.133486	0.234776	0	0.0409869	0.865182	0.93587	0	1.53692	1.69925	1.52683	0.85278	1.19172	1.59621	1.15509	1.83365	1.4906	2.96132	3.27409	2.94188	1.64312	2.29619	3.07556	2.2256	3.53304	2.87206
ENSG00000203832.6	protein_coding	NBPF20	0.429468	0.020053	0.0525962	0	0.336008	0.0630803	0.194138	0	4.23979	4.49802	3.56261	4.75762	4.06269	2.73637	4.15831	3.81205	3.52775	0.261038	0.276938	0.219346	0.292921	0.250135	0.168475	0.256022	0.234703	0.2172
ENSG00000266338.6_2	protein_coding	NBPF15	0.236516	0.0877897	0.169507	0	0.0838269	0.534801	0.7296	0	11.6064	8.6462	8.09222	9.73965	9.26293	7.79864	9.52946	9.84378	10.3348	2.18741	1.62951	1.52511	1.83559	1.74575	1.46978	1.79598	1.85522	1.94776
ENSG00000039560.14_5	protein_coding	RAI14	-0.167746	0.0143604	0.0402867	0	-0.0142049	0.820668	0.911785	0	101.596	114.55	111.917	103.86	110.234	120.993	102.86	118.125	113.385	13.4014	15.1101	14.7628	13.7	14.5409	15.96	13.5682	15.5818	14.9565
ENSG00000094975.14_4	protein_coding	SUCO	-0.252552	0.00567289	0.0191096	0	-0.0183859	0.820607	0.911785	0	52.7853	68.5698	70.1326	61.086	72.695	72.6049	64.2228	68.2309	69.3626	6.68677	8.68632	8.88429	7.73828	9.20889	9.19748	8.13564	8.64339	8.78675
ENSG00000013374.16_6	protein_coding	NUB1	0.197807	0.00324942	0.0122211	0	0.013538	0.820266	0.911785	0	80.397	71.9683	69.5219	82.989	73.8326	78.9442	85.5918	73.2976	68.4682	14.8581	13.3004	12.8482	15.3371	13.6449	14.5896	15.8181	13.546	12.6535
ENSG00000243679.1_5	processed_pseudogene	AC018638.5	0.485875	0.00579688	0.0194275	0	0.0372976	0.82008	0.911755	0	6.41268	4.59798	4.93676	6.73248	4.27936	3.46606	5.65992	4.92189	5.11773	8.50488	6.09811	6.54743	8.92902	5.67555	4.5969	7.50652	6.52771	6.78744
ENSG00000184260.5_2	protein_coding	HIST2H2AC	-0.0657262	0.834123	0.887309	0	-0.161342	0.61128	0.782384	0	1.05995	1.19947	0.814312	0.85278	0.975045	1.77864	1.61712	1.06158	0.993734	2.71781	3.07557	2.08798	2.18662	2.50011	4.56061	4.14646	2.72201	2.54804
ENSG00000178096.9_3	protein_coding	BOLA1	-0.0632826	0.541975	0.660076	0	-0.029224	0.776285	0.889517	0	13.0903	11.7448	12.2656	10.6822	11.9172	12.4049	10.9733	11.8704	11.577	8.95985	8.0389	8.39532	7.31157	8.15689	8.49066	7.51082	8.12487	7.92402
ENSG00000143368.10_4	protein_coding	SF3B4	-0.0433749	0.501976	0.625238	0	-0.0397476	0.53775	0.732211	0	155.706	151.583	157.009	144.03	149.182	162.54	152.067	152.048	145.88	91.3769	88.9573	92.1417	84.5247	87.548	95.3874	89.2412	89.2299	85.6104
ENSG00000014914.21_3	protein_coding	MTMR11	-0.0612498	0.570211	0.683221	0	-0.305431	0.0108832	0.0573406	0	13.3023	9.14598	13.6397	11.6247	10.8338	11.2647	11.6664	10.9054	13.316	2.90952	2.00043	2.98332	2.5426	2.3696	2.46385	2.5517	2.38525	2.91252
ENSG00000264522.6_3	protein_coding	OTUD7B	-0.0613676	0.413769	0.543964	0	-0.0617916	0.410122	0.629668	0	44.9947	50.8276	51.7597	49.6857	48.8064	48.0232	50.3617	45.4069	51.6245	3.68961	4.16791	4.24434	4.07427	4.00217	3.93794	4.1297	3.7234	4.23325
ENSG00000285184.3_3	lncRNA	AC244033.2	0.250883	0.421738	0.551278	0	-0.0302918	0.924461	0.963858	0	1.11294	0.649714	0.763417	1.16696	1.46257	0.912122	1.3861	0.916823	1.39123	0.310531	0.181282	0.213007	0.325603	0.408082	0.254498	0.386747	0.25581	0.388177
ENSG00000136631.15_7	protein_coding	VPS45	0.0653169	0.328126	0.460845	0	-0.079759	0.23827	0.454525	0	32.6994	28.9872	29.9768	32.9891	29.9014	33.11	33.613	30.8824	31.7498	4.92683	4.36752	4.51663	4.97049	4.50525	4.9887	5.06449	4.65307	4.78376
ENSG00000023902.14_3	protein_coding	PLEKHO1	-0.121401	0.429283	0.558509	0	-0.0270186	0.857585	0.93177	0	4.55777	4.19815	3.7153	3.45601	4.17103	4.87985	3.69627	4.10158	4.07431	0.68755	0.633301	0.560461	0.521346	0.629209	0.736137	0.557591	0.618732	0.614619
ENSG00000006756.16_3	protein_coding	ARSD	0.431688	0.000541852	0.00279766	0	-0.0245716	0.820046	0.911755	0	17.5951	11.2451	13.5888	15.8438	13.9215	13.0433	18.3659	12.546	11.6764	2.50429	1.60049	1.93408	2.25502	1.98142	1.85644	2.61399	1.78565	1.66188
ENSG00000118298.12_4	protein_coding	CA14	0.36529	0.187801	0.305129	0	0.183469	0.508357	0.710862	0	1.48393	1.14949	0.814312	1.21185	1.57091	1.505	1.79038	1.20635	1.09311	0.45063	0.349072	0.247286	0.368007	0.477044	0.457031	0.543694	0.366336	0.331949
ENSG00000117362.13_4	protein_coding	APH1A	-0.0126491	0.828362	0.883002	0	0.051325	0.382951	0.605834	0	133.871	146.186	135.278	128.905	139.973	141.196	141.671	136.462	131.322	38.5463	42.0921	38.9512	37.1162	40.3032	40.6555	40.7922	39.2922	37.8122
ENSG00000266472.5_2	protein_coding	MRPS21	-0.0598347	0.444703	0.57335	0	0.0241282	0.755383	0.877197	0	55.7002	57.8745	58.3251	58.3033	59.4777	62.5716	56.3682	63.2608	56.6925	33.9428	35.2679	35.5424	35.5291	36.2448	38.1301	34.3499	38.5501	34.5475
ENSG00000117360.13_3	protein_coding	PRPF3	-0.130649	0.0291366	0.0709295	0	-0.118574	0.0450792	0.155001	0	72.3414	70.2191	80.7186	74.4163	73.0742	76.527	72.0196	77.3509	82.3805	13.3767	12.9843	14.9258	13.7604	13.5122	14.1507	13.3172	14.303	15.2331
ENSG00000163125.15_4	protein_coding	RPRD2	0.00333008	0.959107	0.973064	0	0.00626527	0.923088	0.963136	0	74.1963	77.1161	78.632	78.5905	73.7242	72.1489	75.1383	77.5922	76.7659	8.49122	8.82537	8.99885	8.9941	8.4372	8.25691	8.59903	8.87985	8.7853
ENSG00000143374.17_4	protein_coding	TARS2	-0.000596388	0.993604	0.995743	0	-0.00186542	0.979964	0.991646	0	22.0469	22.4401	22.2409	22.3069	24.2136	21.9365	22.7552	20.4596	22.9552	5.40763	5.50408	5.45521	5.47141	5.93908	5.38056	5.58136	5.0183	5.63043
ENSG00000125731.13_4	protein_coding	SH2D3A	-0.602356	1.60217e-07	2.87573e-06	-1	0.0165524	0.819924	0.911755	0	39.43	56.9749	56.7982	35.2782	56.4984	55.6394	36.3852	57.036	56.146	7.05241	10.1905	10.1589	6.30982	10.1052	9.95161	6.50782	10.2014	10.0422
ENSG00000204653.10_4	protein_coding	ASPDH	1.23521	0.00539588	0.0183651	1	0.105687	0.819175	0.91125	0	0.741963	0.24989	0.45805	1.21185	0.433353	0.228031	1.15509	0.723807	0.645927	0.441382	0.148656	0.272487	0.720908	0.257795	0.135652	0.687142	0.430581	0.384252
ENSG00000178202.13_4	protein_coding	POGLUT3	-0.254831	0.000335207	0.0018735	0	0.0133113	0.819226	0.91125	0	58.668	76.0665	72.7282	63.5097	76.7577	76.2534	64.8003	72.3807	74.0828	11.8809	15.4043	14.7283	12.8614	15.5443	15.4422	13.1228	14.6579	15.0026
ENSG00000143420.18_3	protein_coding	ENSA	0.109476	0.053126	0.11441	0	-0.00983577	0.854938	0.930507	0	129.737	120.497	119.907	120.826	116.572	121.495	131.853	114.844	112.888	23.6187	21.9365	21.8291	21.9963	21.2219	22.1181	24.0038	20.9074	20.5513
ENSG00000143457.11_3	protein_coding	GOLPH3L	-0.131473	0.0836244	0.163118	0	-0.057952	0.427906	0.644516	0	34.8722	38.1332	37.153	33.9766	34.2891	41.3191	35.3456	37.1072	35.526	10.4596	11.4377	11.1437	10.1909	10.2847	12.3933	10.6016	11.1299	10.6557
ENSG00000143387.13_3	protein_coding	CTSK	0.131658	0.584101	0.69393	0	-0.185067	0.459107	0.67101	0	1.43093	1.34941	1.67952	2.37881	1.73341	1.41379	1.55937	1.30285	1.88809	0.7845	0.739806	0.920788	1.30417	0.950336	0.775104	0.854915	0.714284	1.03514
ENSG00000164073.10_5	protein_coding	MFSD8	0.296974	0.00430574	0.0153574	0	0.0216256	0.818133	0.911072	0	19.874	17.8422	18.4238	23.6534	19.6092	17.0567	24.4878	18.7707	19.9244	2.18324	1.96003	2.02393	2.59842	2.15415	1.87374	2.69008	2.06204	2.18877
ENSG00000143379.12_3	protein_coding	SETDB1	0.0432046	0.507454	0.630212	0	0.0195746	0.762772	0.881593	0	49.9235	51.8272	50.4364	53.1417	50.3231	51.6261	55.5019	53.7548	51.7735	7.03842	7.30681	7.11073	7.49213	7.09476	7.27846	7.82488	7.57857	7.29924
ENSG00000143418.19_4	protein_coding	CERS2	-0.0750323	0.222806	0.347189	0	-0.0663332	0.27871	0.50088	0	177.117	184.919	183.933	163.779	167.491	187.988	181.868	173.279	178.524	38.1389	39.8188	39.6065	35.2667	36.0661	40.4798	39.162	37.3126	38.4419
ENSG00000023909.10_3	protein_coding	GCLM	0.247602	0.00192224	0.00790533	0	0.0160275	0.818432	0.911072	0	87.6046	77.8158	73.5934	89.6317	76.0535	80.6772	90.4432	74.1179	71.1016	16.1453	14.3413	13.5631	16.5189	14.0165	14.8686	16.6685	13.6598	13.1039
ENSG00000143409.15_6	protein_coding	MINDY1	-0.121375	0.560764	0.675717	0	0.403974	0.0511171	0.168958	0	1.69591	3.04866	2.08667	1.79533	2.8168	1.96106	2.0214	2.07491	1.93778	0.447235	0.803971	0.550283	0.473451	0.742826	0.517158	0.53307	0.547182	0.511018
ENSG00000162437.14_2	protein_coding	RAVER2	-0.22696	0.00105101	0.00482874	0	-0.0134832	0.818528	0.911072	0	59.145	67.7202	70.1835	61.49	72.695	72.7873	61.2195	70.4988	69.8595	9.74383	11.1565	11.5624	10.1301	11.9761	11.9913	10.0856	11.6143	11.509
ENSG00000163141.19_4	protein_coding	BNIPL	0.452241	0.134903	0.236806	0	-0.168965	0.593254	0.771075	0	1.80191	0.899604	1.17057	1.52603	1.08338	0.729698	1.27059	1.01333	1.4906	0.473066	0.236179	0.307318	0.400637	0.284427	0.191572	0.333577	0.266036	0.391336
ENSG00000197622.13_3	protein_coding	CDC42SE1	0.00710078	0.903654	0.935818	0	-0.0199573	0.73405	0.865448	0	77.9061	71.1187	72.321	76.077	77.7327	76.8463	75.8891	76.7718	79.5484	18.62	16.9978	17.2851	18.1828	18.5786	18.3667	18.1379	18.3489	19.0125
ENSG00000137942.16_2	protein_coding	FNBP1L	0.330906	3.69206e-05	0.000300847	0	-0.014424	0.818358	0.911072	0	70.4865	56.925	55.6277	71.8131	56.4443	60.1545	71.8463	55.2024	54.4069	12.157	9.81803	9.59428	12.3858	9.73513	10.375	12.3916	9.52093	9.38374
ENSG00000143458.12_3	protein_coding	GABPB2	0.19832	0.0662703	0.136173	0	0.16332	0.125061	0.30337	0	29.5725	27.1381	25.0401	26.2567	25.8387	23.5327	24.7766	25.7193	21.7131	3.21825	2.95332	2.72501	2.8574	2.81192	2.56097	2.69633	2.79892	2.36294
ENSG00000143434.15_4	protein_coding	SEMA6C	0.330813	0.0277895	0.0682838	0	-0.00430891	0.976132	0.990062	0	11.6064	7.44672	8.39759	9.42547	7.9087	6.97773	8.02785	7.72061	7.80081	1.99801	1.28193	1.44562	1.62256	1.36146	1.20119	1.38197	1.32908	1.34288
ENSG00000163156.11_3	protein_coding	SCNM1	0.198824	0.0455564	0.101142	0	0.0138463	0.884134	0.944854	0	20.9339	18.092	18.6274	20.0179	17.5508	17.7864	18.8856	17.0336	15.7507	6.41162	5.54121	5.70517	6.13106	5.37544	5.44759	5.78427	5.21703	4.8241
ENSG00000163155.12_3	protein_coding	LYSMD1	0.164921	0.163426	0.274648	0	0.0584721	0.615533	0.785945	0	6.51867	6.1473	5.4966	7.22619	6.87948	6.29364	6.98827	6.273	6.7077	2.59915	2.45107	2.19163	2.88126	2.74302	2.50943	2.78639	2.5012	2.67452
ENSG00000163159.12_3	protein_coding	VPS72	-0.0327886	0.630897	0.73364	0	0.0501879	0.46192	0.673262	0	48.2806	50.9776	50.0802	45.1076	45.1771	46.0622	43.72	49.0259	44.1715	10.6228	11.2162	11.0187	9.92466	9.93995	10.1347	9.61936	10.7868	9.71869
ENSG00000185722.18_5	protein_coding	ANKFY1	0.295539	4.7667e-05	0.000370627	0	-0.0131565	0.817826	0.910863	0	108.539	89.8105	91.2029	111.131	86.7248	86.1499	113.776	92.5991	94.355	7.63066	6.31401	6.4119	7.81291	6.09708	6.05666	7.99887	6.51006	6.63351
ENSG00000159352.15_4	protein_coding	PSMD4	-0.0761549	0.221906	0.346197	0	-0.117546	0.0664592	0.201063	0	180.721	181.52	189.327	175.583	172.041	197.018	185.738	173.038	184.934	59.703	59.967	62.5462	58.0056	56.8356	65.087	61.3603	57.1649	61.0948
ENSG00000143373.18_3	protein_coding	ZNF687	0.0793457	0.194059	0.312552	0	0.127149	0.0437035	0.151789	0	60.6289	62.1727	55.0678	55.0717	59.5861	52.6751	57.2345	56.9395	55.8975	9.58712	9.83122	8.70775	8.70836	9.42221	8.32939	9.05036	9.00372	8.83895
ENSG00000168938.5_2	protein_coding	PPIC	0.179518	0.036649	0.0853725	0	0.233578	0.0085134	0.0474543	0	29.3605	34.9846	25.8035	29.4434	27.0846	26.9532	30.09	30.1104	25.688	13.9945	16.6752	12.2991	14.034	12.9097	12.8471	14.3422	14.3519	12.244
ENSG00000204564.12_4	protein_coding	C6orf136	0.293026	0.00595945	0.0198616	0	0.0224125	0.817571	0.910766	0	21.5169	18.8417	19.6453	23.5637	17.7675	16.9655	22.4087	19.3498	18.5828	10.1591	8.89599	9.27539	11.1254	8.3888	8.01014	10.5801	9.13588	8.77376
ENSG00000159377.11_3	protein_coding	PSMB4	0.0442158	0.523729	0.645205	0	0.0607139	0.383434	0.606326	0	247.18	258.286	248.263	242.235	247.228	248.69	251.809	244.164	221.801	116.32	121.547	116.83	113.993	116.343	117.031	118.498	114.901	104.377
ENSG00000143442.22_7	protein_coding	POGZ	0.106582	0.1163	0.21103	0	0.0203366	0.756986	0.877981	0	103.292	105.604	106.98	120.511	99.0212	94.6783	108.809	108.812	107.572	10.0274	10.2518	10.3854	11.699	9.61278	9.19117	10.563	10.5633	10.4428
ENSG00000116985.12_4	protein_coding	BMP8B	0.215948	0.00724797	0.023197	0	0.017009	0.816424	0.910424	0	28.1416	24.0394	25.1419	26.7055	24.0511	22.7118	28.8771	24.7542	24.1974	5.83124	4.98123	5.20967	5.53367	4.98365	4.70614	5.98366	5.12934	5.01397
ENSG00000125266.8_5	protein_coding	EFNB2	-2.25075	2.30043e-16	7.90417e-14	-1	-0.0160905	0.816642	0.910424	0	7.10164	39.5326	35.677	7.98921	35.3725	39.13	8.25886	35.0323	36.321	1.41891	7.89862	7.12828	1.59625	7.06742	7.81819	1.65012	6.99946	7.25694
ENSG00000143376.14_5	protein_coding	SNX27	-0.077958	0.197108	0.316353	0	-0.0860229	0.156456	0.349816	0	84.7957	85.3125	94.511	87.3427	83.6372	89.0687	84.7833	86.5674	87.697	5.07425	5.10517	5.65562	5.22666	5.00492	5.32995	5.0735	5.18026	5.24786
ENSG00000143436.11_5	protein_coding	MRPL9	-0.124873	0.0962204	0.18201	0	0.0016409	0.981758	0.992748	0	53.9513	59.3739	56.3402	49.9101	56.4984	62.5716	52.4409	54.6716	51.3263	31.0065	34.1229	32.3794	28.684	32.4704	35.9607	30.1384	31.4205	29.4979
ENSG00000143450.16_7	protein_coding	OAZ3	0.48046	0.153592	0.262246	0	0.50534	0.132424	0.314415	0	1.21894	1.09952	0.610734	1.12208	0.975045	0.729698	0.981823	1.30285	1.04342	0.263099	0.237323	0.131823	0.242193	0.210456	0.1575	0.211919	0.281212	0.225215
ENSG00000204789.4_7	processed_pseudogene	ZNF204P	-0.491499	0.000508514	0.0026569	0	-0.0265655	0.81546	0.910262	0	7.52562	10.0456	10.5861	8.30339	12.0797	11.0367	7.73907	10.5193	11.577	3.1396	4.1909	4.41637	3.46408	5.03952	4.60437	3.22865	4.38854	4.82979
ENSG00000165168.7_3	protein_coding	CYBB	0.824299	0.000143809	0.000920315	1	0.0441885	0.815169	0.910151	0	4.39878	1.89916	2.34115	4.35367	2.9793	2.55394	3.69627	2.41269	2.13653	0.994524	0.429384	0.529312	0.984325	0.673593	0.577423	0.835694	0.545488	0.483049
ENSG00000067082.15_3	protein_coding	KLF6	-0.437972	7.01048e-07	1.00664e-05	0	-0.0140039	0.814614	0.910016	0	93.2753	123.296	124.183	104.219	136.344	137.594	93.0999	130.575	132.117	15.1939	20.084	20.2285	16.9765	22.2094	22.413	15.1653	21.2697	21.5209
ENSG00000262580.5_6	lncRNA	AC087741.1	0.797056	0.000123773	0.000813519	1	0.0418558	0.814071	0.909637	0	8.58557	3.74835	4.17335	8.61757	4.55021	4.28697	6.00645	5.50094	4.96867	1.67621	0.731814	0.814789	1.68246	0.888366	0.836973	1.17268	1.07398	0.970064
ENSG00000238279.1_6	lncRNA	BX470102.1	-1.44651	0.0213621	0.0552864	0	0.474384	0.290038	0.513	0	0.211989	0.399824	0.661628	0.0897664	1.02921	0.501667	0.519789	1.54412	0.993734	0.399227	0.752964	1.246	0.169052	1.93826	0.944759	0.978886	2.90795	1.87144
ENSG00000184602.6_3	protein_coding	SNN	0.846144	5.66495e-11	3.08494e-09	1	0.189299	0.00851447	0.0474543	0	57.1311	35.5344	30.2822	53.9496	37.0517	32.2891	58.0431	34.6462	31.402	17.5034	10.8868	9.27764	16.5287	11.3516	9.8925	17.7828	10.6147	9.62071
ENSG00000157426.14_3	protein_coding	AASDH	0.151387	0.0948621	0.180055	0	0.251416	0.00848762	0.0473771	0	18.7081	20.9908	18.831	22.0825	21.2885	17.9688	18.5969	21.5695	16.8438	4.01978	4.51026	4.04619	4.74485	4.57423	3.86094	3.99589	4.63461	3.61921
ENSG00000173153.14_4	protein_coding	ESRRA	0.334985	2.10053e-05	0.00018574	0	-0.0142112	0.814183	0.909637	0	103.239	81.7141	80.1588	92.4594	74.5909	75.5237	99.7994	75.5172	78.505	33.5409	26.5478	26.0425	30.0388	24.2336	24.5366	32.4235	24.5345	25.5052
ENSG00000077254.14_4	protein_coding	USP33	-0.964605	1.367e-10	6.61984e-09	-1	-0.017353	0.814072	0.909637	0	50.4005	101.655	100.415	54.0394	104.98	107.995	55.2131	101.237	103.1	7.28541	14.6943	14.515	7.81141	15.1749	15.6108	7.98108	14.6338	14.9031
ENSG00000168970.22_3	protein_coding	JMJD7-PLA2G4B	0.513442	0.0156254	0.0430489	0	-0.0488552	0.811771	0.908653	0	7.26063	3.54844	4.98766	6.68759	4.22519	3.42046	5.65992	5.50094	5.41585	0.92351	0.451341	0.634401	0.850623	0.53742	0.435062	0.719908	0.699687	0.688864
ENSG00000285867.1_2	lncRNA	BX470102.2	-0.22155	0.527497	0.648021	0	-0.431789	0.235824	0.451709	0	1.16594	0.849626	0.966995	0.628365	0.433353	1.32258	0.80856	0.916823	0.695614	0.36711	0.267515	0.304469	0.197848	0.136446	0.416429	0.254584	0.288672	0.219022
ENSG00000172840.6_5	protein_coding	PDP2	-0.370866	3.83905e-05	0.000309505	0	0.0163255	0.812016	0.908653	0	39.589	52.7768	53.4901	40.5744	50.3773	49.0722	40.3125	54.3821	53.3138	4.73326	6.30999	6.39528	4.85108	6.02311	5.86707	4.81976	6.50192	6.3742
ENSG00000102317.18_3	protein_coding	RBM3	0.339983	2.23646e-05	0.000194658	0	-0.0145719	0.812223	0.908653	0	269.067	207.309	212.23	286.355	234.715	235.51	302.517	228.964	229.95	46.176	35.5773	36.4218	49.1427	40.2806	40.417	51.9164	39.2937	39.4628
ENSG00000189171.14_3	protein_coding	S100A13	0.00646236	0.923337	0.948645	0	-0.0950176	0.169793	0.368187	0	35.0312	32.9355	35.7788	35.9514	34.7766	37.6706	37.8291	33.6812	34.7807	15.8083	14.8626	16.1457	16.2236	15.6934	16.9994	17.0709	15.1991	15.6953
ENSG00000271853.5_7	lncRNA	AL162258.1	0.941891	0.0793028	0.156612	0	0.740897	0.170836	0.369615	0	1.05995	0.99956	0.45805	0.493715	0.704199	0.501667	0.635297	0.193015	0.14906	1.06527	1.00458	0.460352	0.496196	0.707738	0.504188	0.63849	0.193985	0.149809
ENSG00000160678.11_3	protein_coding	S100A1	0.47517	0.0985933	0.18572	0	0.722777	0.0137659	0.068052	0	1.58992	1.49934	1.01789	2.01974	1.95009	1.09455	1.27059	2.41269	1.44091	0.524726	0.494832	0.335937	0.666582	0.643594	0.361236	0.419338	0.796268	0.475549
ENSG00000103257.9_3	protein_coding	SLC7A5	-0.198341	0.0118841	0.0346605	0	0.0171842	0.811395	0.908539	0	1251.53	1479.8	1409.22	1082.31	1271.46	1323.44	1151.16	1295.13	1265.87	262.706	310.621	295.805	227.186	266.889	277.801	241.637	271.858	265.715
ENSG00000143553.10_2	protein_coding	SNAPIN	-0.113984	0.211606	0.334284	0	-0.0298072	0.737136	0.867037	0	26.9756	27.9377	28.7554	24.5062	27.6804	31.2858	27.4333	27.8907	25.1415	17.4713	18.0944	18.6239	15.8719	17.9277	20.2628	17.7677	18.0639	16.2833
ENSG00000175348.11_4	protein_coding	TMEM9B	-0.182558	0.0114979	0.0337797	0	0.0156556	0.810479	0.907781	0	40.9669	47.1293	44.0746	37.9263	45.8271	48.3881	42.6804	46.3237	45.2646	14.5016	16.6829	15.6016	13.4252	16.222	17.1285	15.1081	16.3978	16.0229
ENSG00000143624.14_4	protein_coding	INTS3	-0.100434	0.0924159	0.176384	0	0.0187193	0.743547	0.870323	0	98.416	108.652	103.367	92.6389	96.9628	97.4146	93.1577	102.974	103.945	9.40251	10.3805	9.87548	8.85057	9.26367	9.30683	8.90013	9.83794	9.93069
ENSG00000143554.14_6	protein_coding	SLC27A3	-0.106031	0.330127	0.462907	0	0.234087	0.0350473	0.130656	0	9.27453	9.89565	10.2298	9.24594	11.7547	8.9388	8.48988	12.5942	9.98702	1.69553	1.80908	1.87016	1.6903	2.14894	1.63415	1.55208	2.30242	1.82578
ENSG00000143614.10_4	protein_coding	GATAD2B	-0.0130433	0.84179	0.892423	0	-0.0220808	0.735585	0.866196	0	83.4178	90.7101	92.8315	91.068	85.3706	79.6739	86.7469	83.6239	91.3241	9.02399	9.81286	10.0424	9.85158	9.23524	8.61898	9.38413	9.04629	9.87929
ENSG00000198837.10_5	protein_coding	DENND4B	0.0550211	0.44438	0.573087	0	0.0364825	0.610394	0.781735	0	99.529	89.6106	91.6609	94.9279	90.95	80.6316	83.3972	93.9019	95.4481	13.0856	11.7816	12.0511	12.4807	11.9577	10.6011	10.9647	12.3458	12.5491
ENSG00000160741.17_4	protein_coding	CRTC2	0.151664	0.0412378	0.0936431	0	0.0179157	0.799235	0.901498	0	45.4187	39.2827	40.6647	43.2225	40.8435	38.1267	42.0451	39.0373	38.9047	12.6093	10.9058	11.2895	11.9996	11.3391	10.5849	11.6727	10.8377	10.8009
ENSG00000145147.20_7	protein_coding	SLIT2	0.451056	0.00729766	0.0233354	0	-0.0379741	0.810156	0.907723	0	6.46567	3.6484	3.6644	5.65528	4.11686	4.33258	4.85136	4.34284	4.42211	0.58423	0.329664	0.331111	0.511004	0.371994	0.391486	0.438363	0.392414	0.399577
ENSG00000143578.16_3	protein_coding	CREB3L4	-0.0933401	0.342043	0.475577	0	-0.118307	0.231968	0.447131	0	11.6594	12.2946	12.6218	11.9389	12.7839	13.1802	12.6482	10.5676	12.8192	4.01772	4.23659	4.34936	4.11403	4.40521	4.54175	4.35844	3.64148	4.41735
ENSG00000143543.15_4	protein_coding	JTB	-0.0283509	0.74708	0.822263	0	0.00519364	0.952682	0.978377	0	30.4735	33.9351	32.9796	34.2459	33.9099	37.5794	33.5552	32.8126	29.6133	20.5624	22.8982	22.2535	23.1079	22.8812	25.3572	22.6419	22.1408	19.982
ENSG00000143545.8_3	protein_coding	RAB13	0.136072	0.0823827	0.161377	0	-0.0029794	0.968559	0.987026	0	25.7567	23.4397	24.2258	24.596	22.6427	21.3893	25.5851	22.8241	23.5018	9.36267	8.52043	8.80617	8.94074	8.23072	7.77509	9.30031	8.29664	8.543
ENSG00000086504.16_4	protein_coding	MRPL28	-0.289503	0.00510104	0.0176066	0	-0.0219206	0.809728	0.907504	0	36.5682	43.4809	45.0925	33.797	41.7103	45.0588	36.6162	43.4284	40.445	12.0211	14.2935	14.8233	11.1101	13.7115	14.8122	12.0369	14.2763	13.2955
ENSG00000077150.20_5	protein_coding	NFKB2	-0.333125	7.4437e-05	0.000533632	0	0.0159032	0.809323	0.907203	0	86.6506	104.204	104.435	82.4504	104.817	103.982	78.7191	106.689	103.845	18.3816	22.1053	22.1543	17.4905	22.2353	22.0581	16.699	22.6324	22.0291
ENSG00000143612.20_3	protein_coding	C1orf43	-0.00186734	0.972391	0.981368	0	0.116128	0.0421099	0.148036	0	239.124	269.881	233.86	230.834	261.041	254.436	252.444	252.898	234.819	89.5595	101.079	87.5881	86.4548	97.7682	95.2946	94.5483	94.7185	87.9473
ENSG00000230074.2_6	lncRNA	AL162231.2	0.460505	0.0268689	0.0664061	0	0.557899	0.00849314	0.0473771	0	3.44483	3.6484	2.23936	4.17414	4.60438	3.10122	4.27382	4.48761	3.27932	1.79045	1.89626	1.16391	2.16951	2.39313	1.61186	2.22132	2.33244	1.70443
ENSG00000143575.14_6	protein_coding	HAX1	-0.0704176	0.299982	0.431982	0	0.0875314	0.198575	0.404636	0	69.2145	80.4646	67.8423	62.7916	69.9866	73.6539	67.0527	71.4639	67.3255	32.1181	37.3386	31.4814	29.1376	32.4764	34.1781	31.115	33.1619	31.2415
ENSG00000143515.17_4	protein_coding	ATP8B2	-0.150135	0.0516494	0.111864	0	-0.100058	0.180761	0.382801	0	55.0112	62.7224	67.6388	56.0591	56.6068	57.1901	57.6388	55.2989	62.4562	7.21743	8.22913	8.87415	7.35491	7.42676	7.50329	7.56216	7.25517	8.1942
ENSG00000160712.13_4	protein_coding	IL6R	0.239812	0.0407314	0.0927853	0	0.246855	0.0353204	0.13147	0	12.2954	11.7448	10.2298	12.4775	12.6756	9.80531	13.63	14.0901	12.4714	1.90537	1.82006	1.58528	1.9336	1.96429	1.5195	2.1122	2.1835	1.93264
ENSG00000160714.10_3	protein_coding	UBE2Q1	-0.0296853	0.61649	0.721305	0	0.00460256	0.937794	0.970268	0	96.9321	99.1064	91.9663	89.0931	97.9378	101.109	94.4282	90.0899	93.0135	23.1342	23.6531	21.949	21.2633	23.3742	24.131	22.5366	21.5012	22.1989
ENSG00000160710.17_7	protein_coding	ADAR	0.106667	0.0574472	0.121557	0	0.00807943	0.879673	0.943203	0	525.787	522.72	511.744	538.553	485.627	486.526	550.283	499.572	501.289	54.6045	54.286	53.1461	55.9303	50.4337	50.5271	57.1485	51.882	52.0603
ENSG00000143603.19_5	protein_coding	KCNN3	0.728301	0.120908	0.218103	0	0.361198	0.449562	0.662138	0	0.635968	0.799648	0.712523	0.763014	0.433353	0.319243	1.67487	1.06158	0.794987	0.0467658	0.058802	0.0523952	0.0561081	0.0318666	0.0234755	0.123162	0.0780634	0.0584592
ENSG00000257218.6_4	protein_coding	GATC	0.181843	0.0149823	0.0416351	0	0.0167716	0.808496	0.906629	0	40.543	36.8838	37.5092	45.4667	40.5727	38.9932	40.7745	35.8526	35.3769	9.18092	8.3523	8.49394	10.2959	9.18766	8.82999	9.23336	8.11879	8.01108
ENSG00000163346.17_4	protein_coding	PBXIP1	0.0945324	0.263943	0.393081	0	-0.176103	0.04874	0.163308	0	19.821	16.2928	18.9327	20.4218	15.4924	18.1056	19.1744	17.4679	18.6822	5.14698	4.23081	4.91632	5.303	4.02295	4.70154	4.97908	4.53593	4.85126
ENSG00000144827.9_3	protein_coding	ABHD10	-1.02563	2.82987e-13	3.32015e-11	-1	-0.0134351	0.808039	0.906257	0	116.435	243.943	234.522	118.402	248.149	262.874	125.558	234.707	236.061	38.4782	80.6156	77.5022	39.1282	82.0056	86.8716	41.493	77.5633	78.011
ENSG00000189042.13_5	protein_coding	ZNF567	-0.750428	3.92755e-05	0.000315056	-1	0.0319083	0.807946	0.906223	0	4.39878	7.74659	6.51449	4.62297	8.82957	8.30031	4.73585	7.14157	8.29768	0.931156	1.63984	1.37902	0.978613	1.86909	1.75705	1.00251	1.51176	1.75649
ENSG00000173207.13_3	protein_coding	CKS1B	0.0145545	0.848161	0.897084	0	0.121677	0.120099	0.29586	0	74.8322	80.1647	70.0308	68.6264	69.7699	74.0643	67.5148	77.2061	64.6921	31.9796	34.2584	29.9277	29.3275	29.8162	31.6514	28.8525	32.9941	27.6462
ENSG00000160688.19_3	protein_coding	FLAD1	-0.0171904	0.844685	0.894653	0	-0.105043	0.241272	0.457228	0	51.1954	45.7299	48.5024	49.7755	41.2227	48.2057	43.72	49.2189	49.8854	12.7383	11.3784	12.0683	12.385	10.257	11.9944	10.8783	12.2466	12.4124
ENSG00000159082.17_3	protein_coding	SYNJ1	-0.289811	0.0167793	0.0456442	0	-0.324948	0.00849229	0.0473771	0	16.9591	16.8426	21.7319	17.9533	15.6549	18.4249	15.7669	17.0336	22.0112	2.10151	2.08706	2.69293	2.22469	1.93989	2.28313	1.95377	2.11073	2.72753
ENSG00000135299.17_7	protein_coding	ANKRD6	-0.340207	0.00955407	0.0291182	0	0.028193	0.80723	0.905958	0	7.36663	11.4949	10.8914	9.73965	11.8089	10.6262	9.35619	10.9536	12.0739	0.882548	1.37713	1.30483	1.16684	1.41474	1.27306	1.1209	1.31228	1.44649
ENSG00000163357.10_3	protein_coding	DCST1	0.60568	0.102596	0.191783	0	-0.209749	0.596607	0.77311	0	1.69591	0.449802	1.22147	1.03231	0.704199	0.501667	1.32835	1.10984	0.944047	0.531135	0.140871	0.382545	0.323305	0.220545	0.157115	0.416019	0.347585	0.295661
ENSG00000261824.7_7	lncRNA	LINC00662	-0.412365	0.000615683	0.00311424	0	-0.0239654	0.807145	0.905958	0	11.3944	14.2937	13.2835	10.5027	13.9756	14.8676	11.0311	14.7657	15.6016	0.343226	0.430559	0.400128	0.316364	0.420978	0.447846	0.332281	0.444776	0.469957
ENSG00000143537.13_3	protein_coding	ADAM15	0.127094	0.042489	0.0959259	0	-0.00732154	0.901522	0.952958	0	217.024	204.26	197.776	209.021	187.371	197.748	212.478	190.024	189.108	32.9623	31.0237	30.0389	31.7468	28.4586	30.0346	32.2719	28.8614	28.7223
ENSG00000103647.12_4	protein_coding	CORO2B	-1.28925	9.29856e-06	9.25432e-05	-1	-0.0456396	0.807297	0.905958	0	0.953952	2.54888	2.7483	0.98743	3.08764	2.50834	1.3861	2.21968	2.83214	0.238607	0.637538	0.687419	0.246981	0.772297	0.627398	0.346699	0.555197	0.708389
ENSG00000143590.14_4	protein_coding	EFNA3	-0.289996	0.0220999	0.0568326	0	-0.147514	0.213045	0.424154	0	7.15464	9.24593	10.7387	8.57269	9.64211	10.2614	9.00967	8.44442	9.24172	3.68037	4.75614	5.52404	4.40982	4.95993	5.27848	4.6346	4.34384	4.75397
ENSG00000197043.14_3	protein_coding	ANXA6	-0.389309	2.64165e-06	3.13759e-05	0	-0.0143537	0.806488	0.905687	0	99.953	135.99	127.084	93.4019	128.002	137.229	106.095	124.061	127.546	18.2463	24.8248	23.1989	17.0504	23.3665	25.0509	19.3674	22.6471	23.2833
ENSG00000169241.19_4	protein_coding	SLC50A1	0.0945384	0.236269	0.36226	0	0.0349485	0.656405	0.814985	0	55.2232	52.227	49.4185	47.0376	48.6439	50.5772	53.9425	48.7846	46.0596	23.5997	22.3192	21.119	20.1015	20.788	21.6142	23.0523	20.8481	19.6836
ENSG00000179085.7_2	protein_coding	DPM3	-0.0915078	0.527373	0.647984	0	0.110573	0.438501	0.653382	0	11.5534	14.1938	14.2505	12.0287	13.0548	12.3136	10.6268	12.2082	9.98702	18.5746	22.8195	22.9107	19.3387	20.9884	19.7969	17.0849	19.6274	16.0563
ENSG00000163463.11_3	protein_coding	KRTCAP2	0.215058	0.128485	0.228571	0	-0.0628031	0.653623	0.812918	0	15.5812	9.74571	12.2656	13.5547	11.863	10.1702	13.7455	13.7041	14.5582	4.07246	2.54723	3.20585	3.54279	3.10064	2.65817	3.59266	3.58183	3.80507
ENSG00000213281.5_3	protein_coding	NRAS	-0.235043	0.000819818	0.0039305	0	0.0145721	0.805983	0.905288	0	108.963	138.589	131.613	118.806	142.898	140.193	118.858	130.72	136.142	25.1878	32.0363	30.4237	27.4632	33.0324	32.4071	27.4753	30.2172	31.4705
ENSG00000185499.16_5	protein_coding	MUC1	0.308428	0.121787	0.219269	0	0.0785252	0.69032	0.838906	0	4.0278	3.34853	3.35904	4.35367	3.62933	2.46273	3.46526	3.18475	3.82587	1.35982	1.1305	1.13404	1.46984	1.2253	0.831441	1.1699	1.0752	1.29165
ENSG00000129103.18_4	protein_coding	SUMF2	0.235025	0.000139849	0.000898959	0	-0.0122602	0.80596	0.905288	0	207.644	174.323	172.023	201.929	171.445	181.375	207.684	174.196	170.972	50.6324	42.5075	41.9467	49.2391	41.8058	44.2271	50.6424	42.4765	41.6903
ENSG00000173171.14_4	protein_coding	MTX1	0.0901457	0.41617	0.546176	0	-0.1299	0.251117	0.468563	0	24.1138	21.4406	20.3069	20.6463	19.0675	24.6273	28.2418	21.8107	23.2534	7.35625	6.54075	6.1949	6.29843	5.81682	7.5129	8.61557	6.65367	7.09377
ENSG00000160766.14_2	transcribed_unprocessed_pseudogene	GBAP1	0.0679787	0.691266	0.780226	0	-0.0758203	0.661697	0.818528	0	5.29973	3.99824	4.27514	5.16157	3.73767	4.24137	3.46526	4.92189	4.86929	1.45998	1.10144	1.17772	1.42192	1.02966	1.16842	0.954616	1.35589	1.3414
ENSG00000135956.8_2	protein_coding	TMEM127	0.250936	0.0010015	0.00464117	0	0.0161293	0.805521	0.905117	0	89.8305	82.4137	75.6292	84.7395	73.9951	75.3869	91.3095	69.4373	72.2941	14.1088	12.9439	11.8783	13.3092	11.6217	11.8403	14.3411	10.9058	11.3545
ENSG00000177628.16_4	protein_coding	GBA	0.125047	0.0634455	0.131285	0	-0.163868	0.01963	0.0872977	0	41.0729	34.7847	39.545	44.3446	36.5642	40.2246	44.9328	35.3701	39.7493	11.259	9.53528	10.8402	12.1559	10.0231	11.0265	12.3171	9.69574	10.8962
ENSG00000136603.14_5	protein_coding	SKIL	-0.520096	0.000101834	0.000693845	0	-0.0253537	0.805278	0.90506	0	11.2884	14.5436	16.9479	11.0861	18.3092	14.6852	11.5509	15.0069	17.0425	1.45058	1.86888	2.17783	1.42459	2.35276	1.88707	1.4843	1.92842	2.18999
ENSG00000116521.11_3	protein_coding	SCAMP3	0.123047	0.0578037	0.122168	0	0.0833044	0.187344	0.3899	0	84.1598	80.8644	76.6471	81.7772	80.2245	74.9308	76.7554	75.1312	71.3501	34.4635	33.114	31.387	33.4878	32.852	30.6842	31.4314	30.7663	29.2179
ENSG00000176444.19_3	protein_coding	CLK2	0.0277112	0.787145	0.852352	0	-0.271087	0.0161079	0.0758163	0	61.3179	38.9329	53.032	56.2835	49.6189	48.5249	50.073	47.9161	63.1518	16.7627	10.6432	14.4976	15.3864	13.5645	13.2654	13.6886	13.099	17.264
ENSG00000143630.10_3	protein_coding	HCN3	0.338033	0.0346477	0.0815263	0	0.0698642	0.648521	0.809165	0	17.9131	10.5454	12.52	16.517	14.3007	10.2614	13.7455	15.2482	15.5022	4.22379	2.48653	2.95214	3.8946	3.372	2.41956	3.2411	3.59543	3.65533
ENSG00000186889.10_4	protein_coding	TMEM17	-0.414952	0.0136449	0.0386627	0	0.0363778	0.804987	0.904874	0	3.07385	4.74791	4.27514	3.81507	5.03773	4.92546	4.0428	5.16316	5.36616	1.02976	1.59059	1.43221	1.27808	1.68768	1.65007	1.35437	1.7297	1.79771
ENSG00000225855.7_5	lncRNA	RUSC1-AS1	0.00926561	0.960091	0.973379	0	0.257397	0.166994	0.364704	0	8.79756	7.64664	8.90653	9.3357	10.238	6.47607	6.87276	11.9669	9.6889	2.50215	2.17481	2.53314	2.65521	2.91182	1.84188	1.95471	3.40357	2.75566
ENSG00000233589.1_6	lncRNA	AL138789.1	-0.225586	0.212657	0.335431	0	0.482906	0.00846707	0.0472865	0	4.61077	5.54756	5.29303	3.77019	6.60864	4.19576	3.34975	7.04506	4.27305	4.80288	5.77871	5.51357	3.92728	6.884	4.37058	3.48932	7.3386	4.4511
ENSG00000116539.13_5	protein_coding	ASH1L	0.190461	0.138602	0.241819	0	0.0138966	0.911578	0.957353	0	97.0381	90.0104	93.086	114.721	92.2501	75.6605	105.113	98.2448	109.311	7.25193	6.72673	6.95658	8.57346	6.89411	5.65433	7.85538	7.34211	8.1691
ENSG00000235919.4_6	lncRNA	ASH1L-AS1	0.0728289	0.797916	0.859885	0	-0.0516476	0.857776	0.93177	0	1.05995	0.599736	1.01789	1.25673	1.35423	1.00333	1.03958	1.15809	1.19248	0.876714	0.49606	0.841927	1.03948	1.12012	0.829888	0.859865	0.957892	0.986336
ENSG00000125459.15_4	protein_coding	MSTO1	-0.18226	0.0798433	0.157321	0	-0.212414	0.0442935	0.153138	0	17.9661	16.0929	21.7319	20.0628	17.6591	20.3859	16.1712	19.4945	19.6262	4.26951	3.82436	5.16443	4.76777	4.19657	4.84456	3.84297	4.63273	4.66403
ENSG00000163374.19_4	protein_coding	YY1AP1	-0.0626752	0.327534	0.460149	0	-0.12469	0.0607136	0.189665	0	42.5569	40.4822	44.7362	39.0035	40.0852	41.684	43.5467	39.1339	44.1218	8.50967	8.09482	8.94546	7.79914	8.01543	8.33513	8.7076	7.82521	8.82259
ENSG00000132676.16_6	protein_coding	DAP3	-0.10835	0.0900381	0.172877	0	0.0377305	0.53936	0.733324	0	112.46	126.594	127.084	113.33	127.568	132.531	119.494	127.824	112.441	24.5118	27.5925	27.6991	24.7014	27.8048	28.8865	26.0448	27.8606	24.5076
ENSG00000203761.5_5	unprocessed_pseudogene	MSTO2P	-0.29277	0.111654	0.204554	0	-0.190009	0.286643	0.509135	0	5.61772	4.69793	5.85286	4.57808	6.93365	5.1991	5.25564	4.97014	7.8505	3.28714	2.74894	3.42473	2.67881	4.05714	3.04219	3.07527	2.90822	4.59362
ENSG00000116580.18_2	protein_coding	GON4L	0.0392326	0.580375	0.690925	0	0.0200653	0.77662	0.889709	0	59.463	56.2253	57.0527	60.8616	59.0986	53.3135	60.0645	62.6817	65.2883	4.96892	4.69836	4.7675	5.08579	4.93846	4.45505	5.01917	5.23788	5.45569
ENSG00000132718.9_3	protein_coding	SYT11	0.56808	0.0743172	0.148851	0	-0.570748	0.115891	0.2901	0	1.16594	0.449802	1.22147	1.92998	0.65003	0.957728	1.32835	0.916823	0.844674	0.224998	0.0868009	0.235714	0.372439	0.12544	0.184818	0.256339	0.176924	0.163001
ENSG00000143622.11_3	protein_coding	RIT1	0.142726	0.409933	0.5403	0	0.0135773	0.937493	0.970166	0	13.4083	7.79657	9.46637	12.1185	10.9963	9.30365	8.25886	12.2565	12.0242	3.32054	1.9308	2.34432	3.0011	2.72321	2.30402	2.04529	3.03528	2.97776
ENSG00000187210.14_5	protein_coding	GCNT1	-0.298854	0.0092839	0.0284571	0	-0.0251874	0.804765	0.904694	0	9.16854	12.6944	12.6218	12.298	12.8923	14.3659	10.9733	13.7523	13.0179	0.991086	1.37222	1.36437	1.32937	1.39361	1.5529	1.18618	1.48658	1.40719
ENSG00000148248.14_3	protein_coding	SURF4	-0.212058	0.000944494	0.00440672	0	-0.0135671	0.803693	0.903841	0	278.66	326.057	320.737	271.364	312.556	343.46	280.917	314.808	298.17	80.8882	94.6463	93.1022	78.7703	90.7274	99.698	81.5433	91.3811	86.5515
ENSG00000285677.2_2	lncRNA	AL355388.3	-0.283261	0.423664	0.553243	0	-0.262174	0.455066	0.666978	0	0.635968	0.849626	1.37415	0.628365	0.595861	0.912122	1.44386	1.20635	0.944047	0.268795	0.359098	0.580791	0.265581	0.251843	0.385512	0.610252	0.509867	0.399005
ENSG00000163479.14_4	protein_coding	SSR2	-0.157069	0.0301689	0.0729503	0	-0.077134	0.262226	0.480469	0	109.969	122.446	119.704	109.56	117.98	135.815	114.122	112.19	116.317	16.5542	18.4324	18.0195	16.4925	17.7601	20.4448	17.1794	16.8885	17.5096
ENSG00000249244.1_5	unprocessed_pseudogene	AC110373.1	-1.10836	0.0114205	0.0336345	-1	-0.0858488	0.80358	0.903838	0	0.370981	0.799648	0.559839	0.269299	0.595861	0.775304	0.577543	1.01333	1.24217	0.105843	0.228145	0.159726	0.0768328	0.170003	0.221199	0.164777	0.28911	0.354399
ENSG00000174885.12_2	protein_coding	NLRP6	1.5607	0.000567482	0.00291539	1	0.115327	0.803321	0.903838	0	1.32493	0.49978	0.45805	1.03231	0.162507	0.364849	0.981823	0.530792	0.29812	0.413138	0.15584	0.142828	0.321894	0.0506727	0.113766	0.30615	0.16551	0.0929592
ENSG00000170348.9_3	protein_coding	TMED10	-0.149371	0.00650531	0.0212731	0	-0.0124008	0.801436	0.902435	0	278.607	321.908	319.821	294.568	324.636	333.335	297.608	310.996	312.579	56.2161	64.9533	64.5321	59.4367	65.5036	67.2589	60.05	62.7514	63.0708
ENSG00000254726.3_3	protein_coding	MEX3A	0.234447	0.0239444	0.0605794	0	-0.00992728	0.919361	0.961189	0	17.0651	14.9434	14.9121	15.754	11.863	12.6785	16.5177	14.7174	14.3595	2.58916	2.26725	2.26249	2.39023	1.79989	1.92361	2.5061	2.23296	2.17865
ENSG00000124151.19_4	protein_coding	NCOA3	-0.0264892	0.725574	0.806311	0	-0.220468	0.00845218	0.0472216	0	62.8018	61.0731	71.2014	75.0896	61.2111	68.6372	73.1747	62.2957	75.2753	7.46131	7.25593	8.45923	8.92118	7.27232	8.15459	8.69368	7.40118	8.94325
ENSG00000160785.13_2	protein_coding	SLC25A44	0.151831	0.0694112	0.141101	0	0.0178247	0.824308	0.913149	0	38.7411	29.7869	30.6385	34.4254	34.9391	33.6573	36.0387	34.7428	33.8863	5.31209	4.08431	4.20108	4.72033	4.79077	4.61502	4.94154	4.76385	4.64642
ENSG00000160783.19_5	protein_coding	PMF1	-0.127992	0.249928	0.377473	0	0.0845639	0.433935	0.649597	0	11.5534	14.0438	12.8254	10.772	12.8381	11.4471	11.4931	12.2565	12.6701	4.58469	5.57295	5.08945	4.27459	5.09448	4.54251	4.56075	4.86368	5.02782
ENSG00000160781.17_4	protein_coding	PAQR6	0.46628	0.0376307	0.0871946	0	0.0810317	0.709922	0.849633	0	8.53257	4.69793	6.56539	9.51523	7.04199	4.37819	8.20111	8.39617	8.1983	3.37123	1.85616	2.59399	3.75948	2.7823	1.72982	3.24026	3.31733	3.23916
ENSG00000238249.2_4	processed_pseudogene	HMGN2P17	0.421094	0.0142638	0.040078	0	0.0411751	0.800965	0.90218	0	4.55777	3.69837	2.85009	4.44344	3.08764	3.87652	4.10055	3.28126	3.03089	6.13428	4.97762	3.83592	5.9804	4.15564	5.21739	5.51892	4.41623	4.07926
ENSG00000163472.19_4	protein_coding	TMEM79	-0.192063	0.16449	0.27605	0	-0.133738	0.323281	0.548028	0	6.30668	7.0469	7.83775	7.36084	6.71698	6.33925	5.48666	6.32125	7.90018	2.08004	2.32418	2.58501	2.42772	2.21536	2.09078	1.80958	2.08485	2.6056
ENSG00000198715.13_7	protein_coding	GLMP	-0.0194472	0.829388	0.883705	0	0.134877	0.141986	0.328914	0	18.6551	22.5901	17.6604	18.1328	20.8551	20.5684	19.6942	19.3498	18.8809	5.37455	6.50823	5.08798	5.22409	6.00839	5.92577	5.67393	5.5747	5.43963
ENSG00000139044.11_4	protein_coding	B4GALNT3	-0.32705	0.000331623	0.00185634	0	-0.0185911	0.80074	0.901996	0	16.6942	19.9912	19.9506	15.8886	18.4717	20.2491	15.2471	20.7491	19.825	2.43107	2.9112	2.90529	2.31377	2.68992	2.94876	2.22035	3.02157	2.88699
ENSG00000163467.11_2	protein_coding	TSACC	-0.0380696	0.884571	0.921864	0	0.314639	0.220015	0.432743	0	1.85491	1.69925	1.47594	1.16696	1.78758	1.59621	1.61712	2.36444	1.63966	1.66359	1.52399	1.32371	1.0466	1.60321	1.43158	1.45033	2.12057	1.47055
ENSG00000132677.13_3	protein_coding	RHBG	-0.424137	0.0834979	0.16292	0	-0.218493	0.347143	0.570896	0	3.02085	2.89872	2.49383	2.55834	2.60012	3.23803	1.55937	2.79872	3.92525	0.892686	0.856597	0.736947	0.756011	0.768357	0.956866	0.460805	0.827046	1.15994
ENSG00000125462.17_6	protein_coding	C1orf61	0.178368	0.320118	0.452994	0	0.0415625	0.816217	0.910424	0	7.20764	5.34765	6.92165	7.89944	6.77114	4.97107	7.39255	8.34791	8.09893	0.585321	0.434274	0.562096	0.641501	0.549874	0.403692	0.600337	0.67792	0.657701
ENSG00000140807.7_4	protein_coding	NKD1	-0.375031	0.00371518	0.0135834	0	-0.0282581	0.799446	0.901594	0	11.0764	14.7935	14.4031	10.368	12.2964	13.545	10.569	13.5593	13.5645	0.638081	0.852209	0.829722	0.59727	0.708359	0.780288	0.60885	0.781112	0.781408
ENSG00000135482.7_6	protein_coding	ZC3H10	-0.0610144	0.528667	0.649025	0	-0.284892	0.0084365	0.0471523	0	11.0764	9.29591	10.8405	10.0538	8.93791	12.0856	11.4931	9.60251	10.9808	1.32446	1.11155	1.29625	1.20218	1.06874	1.44513	1.37428	1.14821	1.31302
ENSG00000163382.12_4	protein_coding	NAXE	0.137355	0.0500353	0.109072	0	0.0212109	0.750188	0.874472	0	95.7132	89.9604	90.4395	95.9602	88.3499	88.5214	92.1758	83.6721	79.1509	49.5154	46.5393	46.7871	49.6432	45.7061	45.7949	47.6854	43.2862	40.9472
ENSG00000065485.20_5	protein_coding	PDIA5	-0.360895	4.87623e-05	0.00037791	0	-0.0172832	0.799232	0.901498	0	24.9617	30.4866	30.4858	25.0897	30.3347	33.0644	23.1017	32.0888	30.4579	6.13763	7.49609	7.49589	6.16909	7.45875	8.12993	5.68028	7.89004	7.48904
ENSG00000204256.13_7	protein_coding	BRD2	0.235433	5.69079e-05	0.000428621	0	-0.0117378	0.798468	0.900985	0	459.699	391.128	398.3	461.938	393.431	401.288	472.892	390.373	384.923	62.0963	52.8337	53.8025	62.3987	53.1448	54.2061	63.8784	52.7318	51.9955
ENSG00000132692.19_6	protein_coding	BCAN	0.0423922	0.766266	0.836902	0	-0.272941	0.0739732	0.216314	0	8.53257	7.4967	10.128	9.42547	7.2045	7.61622	8.48988	6.61077	8.04924	1.79068	1.57328	2.1255	1.97806	1.51196	1.59837	1.78172	1.38736	1.68924
ENSG00000272405.1_6	lncRNA	AL365181.3	-0.032907	0.656501	0.754117	0	-0.116382	0.127615	0.307291	0	77.2171	62.1727	74.4077	70.6461	70.7449	70.2334	64.9736	68.0862	73.2382	23.9656	19.2963	23.0936	21.9262	21.9568	21.7981	20.1656	21.1316	22.7307
ENSG00000229953.1_6	lncRNA	AL590666.2	-0.20991	0.0738973	0.148241	0	-0.245778	0.0394024	0.141376	0	13.0373	11.6449	14.0469	10.7271	10.9963	12.2224	10.9733	11.1949	13.9123	17.1997	15.3626	18.5315	14.1518	14.507	16.1246	14.4767	14.769	18.3539
ENSG00000100345.21_3	protein_coding	MYH9	-0.200849	0.0137274	0.038843	0	0.0190898	0.798316	0.900954	0	711.701	889.209	879.558	720.375	739.734	710.406	685.543	837.397	844.177	78.9726	98.6694	97.5986	79.9351	82.0832	78.8289	76.0701	92.9202	93.6725
ENSG00000120784.16_5	protein_coding	ZFP30	-1.232	1.56006e-07	2.82022e-06	-1	0.0344678	0.797515	0.900472	0	2.38488	6.94694	6.87075	3.54577	7.74619	7.84425	2.88771	6.75554	6.16115	0.309524	0.901615	0.891727	0.460191	1.00535	1.01807	0.374784	0.876773	0.79963
ENSG00000172671.19_2	protein_coding	ZFAND4	-0.514449	0.000231079	0.00136949	0	-0.326818	0.00841417	0.0470457	0	9.75151	10.5953	12.8254	9.02152	11.8089	14.3659	9.76047	10.085	13.4651	1.56475	1.70015	2.05799	1.44761	1.89488	2.30519	1.56619	1.61827	2.16064
ENSG00000118600.11_3	protein_coding	RXYLT1	-0.316872	0.00176388	0.00738241	0	0.0220604	0.797346	0.900352	0	20.192	23.5396	25.3454	19.3447	27.6263	27.4549	21.1381	25.5263	22.6074	2.58739	3.01636	3.24775	2.47881	3.54001	3.51805	2.70862	3.27092	2.8969
ENSG00000143314.12_4	protein_coding	MRPL24	-0.0333365	0.62002	0.724494	0	0.00253446	0.969754	0.987407	0	59.039	61.373	59.6992	55.7898	58.611	62.6172	59.0249	58.1459	55.4503	34.8313	36.2083	35.2208	32.9143	34.5788	36.9423	34.8229	34.3043	32.7141
ENSG00000143321.19_3	protein_coding	HDGF	0.0725732	0.208793	0.330928	0	-0.0539779	0.345347	0.569761	0	550.059	519.571	510.268	520.286	507.403	542.895	575.521	480.56	511.773	149.717	141.418	138.886	141.613	138.106	147.767	156.647	130.8	139.296
ENSG00000143294.15_3	protein_coding	PRCC	0.0449654	0.530543	0.650545	0	-0.0497738	0.488819	0.695329	0	89.3005	87.5115	83.5178	84.156	75.6743	87.5637	84.7833	78.5572	79.1509	21.9358	21.4963	20.5153	20.6721	18.5886	21.5091	20.8262	19.2968	19.4426
ENSG00000027869.11_3	protein_coding	SH2D2A	0.294072	0.211325	0.334023	0	0.0286292	0.903563	0.953909	0	1.80191	2.14905	2.08667	2.64811	1.30006	1.82424	2.25242	2.12317	1.58997	0.717321	0.855515	0.830682	1.05418	0.51754	0.726212	0.896663	0.84521	0.632951
ENSG00000198720.13_4	protein_coding	ANKRD13B	0.324425	0.00270805	0.0104576	0	0.0247726	0.797229	0.90029	0	39.589	30.4866	30.6385	37.9712	28.6555	27.9565	32.2269	30.1586	29.2655	9.19178	7.07838	7.11365	8.81615	6.65324	6.49095	7.48244	7.00224	6.79486
ENSG00000132694.18_2	protein_coding	ARHGEF11	-0.0577439	0.385413	0.516952	0	-0.0283711	0.666792	0.821763	0	89.5125	86.8118	91.5592	82.4504	85.4248	85.1466	82.4731	87.3877	88.1442	10.0014	9.69964	10.2301	9.21234	9.54467	9.51359	9.21487	9.76399	9.84851
ENSG00000224520.2_4	processed_pseudogene	KRT8P45	0.0268341	0.910656	0.940037	0	0.0650313	0.784666	0.893939	0	1.80191	1.89916	1.78131	2.19928	1.35423	1.55061	1.44386	2.36444	2.08684	1.24527	1.31248	1.23103	1.51989	0.935887	1.0716	0.997828	1.63403	1.44218
ENSG00000117036.12_3	protein_coding	ETV3	0.0289866	0.707607	0.792522	0	0.0124752	0.871492	0.939098	0	45.5777	49.5282	43.8201	49.2369	42.9561	48.4337	47.8205	48.4951	47.5502	6.79554	7.38456	6.53349	7.34111	6.40467	7.22136	7.12995	7.23052	7.08963
ENSG00000183853.18_7	protein_coding	KIRREL1	0.0806316	0.277909	0.407571	0	0.0673813	0.361975	0.5847	0	84.1068	74.967	74.4586	74.8203	73.2909	69.1845	72.0773	80.5839	74.8778	10.6843	9.52325	9.45867	9.50461	9.31032	8.78868	9.15617	10.2368	9.51192
ENSG00000117322.17_4	protein_coding	CR2	-0.339431	0.0158659	0.0436033	0	0.0322073	0.796664	0.89984	0	6.57167	10.1955	8.44848	6.10411	7.85453	7.98107	7.73907	8.20315	9.29141	1.34528	2.08711	1.72947	1.24956	1.60789	1.63379	1.58425	1.67925	1.90203
ENSG00000256029.6_8	protein_coding	AL590560.1	0.919284	0.0684366	0.139552	0	0.0207104	0.969714	0.987407	0	0.688965	0.24989	0.407156	1.43626	0.704199	0.866516	0.750806	0.6273	0.248433	0.0850574	0.0308506	0.0502661	0.177316	0.0869382	0.106977	0.0926921	0.0774444	0.0306708
ENSG00000155097.12_3	protein_coding	ATP6V1C1	-0.169092	0.005954	0.019855	0	0.0142991	0.794796	0.898527	0	131.963	152.533	157.417	140.843	165.649	157.706	148.544	160.251	158.55	22.554	26.0695	26.9042	24.0717	28.3113	26.9537	25.3878	27.3886	27.098
ENSG00000146476.11_3	protein_coding	ARMT1	-0.189144	0.0108106	0.0321466	0	0.0174797	0.793895	0.898306	0	34.2363	42.0815	40.2066	36.3554	42.8478	43.645	38.5799	41.0158	40.4946	12.1448	14.9278	14.2627	12.8966	15.1996	15.4825	13.6857	14.5498	14.3649
ENSG00000227403.2_5	lncRNA	LINC01806	0.424984	0.00622835	0.0205537	0	-0.0379944	0.793219	0.898117	0	7.47262	5.79745	5.75108	8.7971	6.28362	7.25137	10.107	6.99681	6.55864	3.00105	2.32829	2.30967	3.53297	2.52354	2.9122	4.05904	2.80996	2.63399
ENSG00000143315.7_4	protein_coding	PIGM	0.11536	0.205729	0.327221	0	-0.126937	0.17206	0.371095	0	17.5951	12.8444	15.5737	15.9335	13.3256	14.1379	14.9006	14.7657	15.0551	2.49966	1.82474	2.21249	2.26361	1.89311	2.00851	2.11686	2.09769	2.13881
ENSG00000162729.14_5	protein_coding	IGSF8	-0.0269963	0.728665	0.808834	0	-0.0014888	0.984668	0.993626	0	33.4943	35.1345	33.6412	32.1364	31.4181	33.6117	31.9381	32.7161	32.1473	12.9222	13.555	12.9789	12.3983	12.1212	12.9675	12.3218	12.622	12.4025
ENSG00000131747.15_4	protein_coding	TOP2A	0.332996	0.000146204	0.000932743	0	0.0185878	0.793201	0.898117	0	421.117	364.34	351.834	456.956	356.65	336.573	451.234	348.055	366.986	66.0679	57.1603	55.1982	71.6906	55.9538	52.8041	70.7929	54.6054	57.5754
ENSG00000132716.18_5	protein_coding	DCAF8	0.0690913	0.461049	0.587995	0	-0.097847	0.30334	0.526994	0	40.172	31.5861	37.8655	44.3446	37.9184	36.8041	40.3702	41.8361	44.569	5.29484	4.16319	4.99084	5.84481	4.99781	4.85095	5.32098	5.51418	5.87438
ENSG00000133121.21_5	protein_coding	STARD13	-0.944392	1.02403e-05	0.000100121	-1	-0.0383141	0.793348	0.898117	0	2.64987	6.39719	4.88587	3.45601	5.41692	6.7041	3.11873	5.54919	6.21084	0.315987	0.762841	0.582622	0.412116	0.645948	0.799439	0.371897	0.661721	0.74062
ENSG00000162735.18_3	protein_coding	PEX19	0.0380251	0.579019	0.68988	0	0.108863	0.12144	0.298044	0	40.9139	43.281	39.8504	43.043	44.4729	44.4203	40.89	43.4767	37.3147	9.17147	9.70208	8.93306	9.64873	9.96926	9.95749	9.16611	9.74595	8.36465
ENSG00000116747.12_5	protein_coding	RO60	-0.59116	2.19028e-07	3.74502e-06	-1	-0.0193266	0.792776	0.898073	0	54.5343	80.3147	83.2125	61.086	91.8167	89.0231	60.18	89.3178	92.6657	5.99146	8.82385	9.14222	6.71127	10.0875	9.78061	6.61173	9.81299	10.1808
ENSG00000162736.17_5	protein_coding	NCSTN	-0.0440626	0.370583	0.503053	0	0.00373179	0.938768	0.970977	0	99.158	104.504	104.232	101.077	104.709	104.164	100.435	101.623	101.609	24.0034	25.2975	25.2316	24.4679	25.3471	25.2153	24.3124	24.6	24.5968
ENSG00000099992.15_4	protein_coding	TBC1D10A	-0.368749	0.0122491	0.0354669	0	-0.034474	0.791739	0.897391	0	7.04865	7.74659	8.39759	6.55294	8.12537	9.62289	6.17971	9.07172	7.50269	1.00023	1.09928	1.19165	0.929891	1.15303	1.36553	0.876927	1.28732	1.06466
ENSG00000133835.16_5	protein_coding	HSD17B4	-0.234674	0.00141004	0.00616987	0	-0.0166491	0.79173	0.897391	0	91.5794	116.399	114.258	104.578	121.501	126.603	104.477	111.901	112.838	8.61437	10.949	10.7476	9.83706	11.429	11.9088	9.82763	10.5259	10.6141
ENSG00000158769.18_4	protein_coding	F11R	-0.071508	0.253823	0.381872	0	-0.00102849	0.986626	0.994718	0	73.5603	80.1647	81.1258	78.9944	84.233	85.7395	80.1052	79.9566	77.5609	14.5347	15.8397	16.0296	15.6085	16.6436	16.9412	15.8279	15.7986	15.3252
ENSG00000075142.13_3	protein_coding	SRI	-0.285417	0.000331441	0.00185622	0	-0.190531	0.00840992	0.0470402	0	59.145	57.7746	67.2316	52.1991	55.7942	65.3535	50.4195	59.1592	64.5927	13.9592	13.6357	15.8677	12.3198	13.1683	15.4245	11.8998	13.9625	15.2449
ENSG00000158773.14_4	protein_coding	USF1	0.0693144	0.298132	0.430062	0	-0.0835976	0.214932	0.426289	0	48.6516	41.8316	44.5327	47.9352	44.2562	46.2902	47.9938	43.9592	46.9539	20.8269	17.9074	19.0636	20.5202	18.9453	19.816	20.5453	18.8182	20.1001
ENSG00000186517.14_4	protein_coding	ARHGAP30	0.550905	0.0810082	0.159103	0	-0.727359	0.054684	0.17674	0	0.79496	0.449802	0.763417	1.3465	0.270846	0.638485	1.03958	0.579046	0.794987	0.156983	0.0888235	0.150754	0.265896	0.0534846	0.126083	0.205288	0.114346	0.156988
ENSG00000072274.13_3	protein_coding	TFRC	0.193912	0.00369335	0.0135073	0	-0.0156471	0.79149	0.897391	0	817.643	728.28	727.028	847.529	732.855	725.776	844.079	708.897	740.878	104.907	93.4411	93.2804	108.741	94.028	93.1198	108.299	90.9542	95.0575
ENSG00000018510.15_5	protein_coding	AGPS	0.184909	0.0121148	0.035191	0	-0.0179896	0.790308	0.896741	0	112.831	104.204	110.085	127.154	110.884	111.051	126.944	103.794	101.659	12.7652	11.7891	12.4544	14.3856	12.5449	12.5637	14.3618	11.7427	11.5012
ENSG00000158793.14_4	protein_coding	NIT1	-0.132944	0.119858	0.216534	0	0.0454433	0.579446	0.762011	0	29.1485	28.7873	28.5009	25.0897	30.2806	29.0967	22.8129	28.2285	26.9302	7.6828	7.5876	7.5121	6.61299	7.98117	7.66913	6.0129	7.4403	7.0981
ENSG00000158796.17_4	protein_coding	DEDD	-0.0308455	0.64758	0.747558	0	-0.0698168	0.306863	0.530721	0	31.6394	31.886	31.5037	32.0915	32.5557	33.3381	32.0536	28.8558	32.992	11.2157	11.3031	11.1676	11.3759	11.5405	11.8178	11.3625	10.2289	11.6951
ENSG00000142409.6_3	protein_coding	ZNF787	0.229436	0.0153514	0.0424317	0	0.0233882	0.790021	0.89674	0	43.7758	37.5835	36.644	42.4595	35.86	37.397	41.3521	37.1554	34.7807	11.8762	10.1963	9.94141	11.5191	9.7287	10.1457	11.2187	10.0802	9.43589
ENSG00000224985.1_6	lncRNA	AL590714.1	0.103518	0.734147	0.813099	0	0.0343343	0.910531	0.956949	0	0.79496	1.24945	1.32326	1.0772	0.975045	0.957728	1.79038	1.20635	1.09311	2.09752	3.2967	3.49144	2.84221	2.57268	2.52699	4.72396	3.18297	2.88419
ENSG00000287271.1_1	lncRNA	AC011455.6	0.545572	0.00390774	0.0141477	0	-0.0471577	0.789839	0.896646	0	5.72371	3.34853	3.81709	4.98203	2.87097	3.60288	4.62034	3.90856	3.08057	2.98265	1.74493	1.9891	2.59616	1.49607	1.87748	2.40768	2.03677	1.6053
ENSG00000155304.6_3	protein_coding	HSPA13	-0.442652	4.47894e-05	0.000351089	0	-0.0221331	0.78976	0.896627	0	42.1859	58.8741	62.2439	44.2548	59.6402	60.9754	44.4708	56.7465	54.705	10.1579	14.1763	14.9877	10.6561	14.3608	14.6822	10.7081	13.664	13.1724
ENSG00000140471.17_3	protein_coding	LINS1	0.051048	0.561444	0.67631	0	-0.26056	0.00836298	0.0467957	0	15.6342	12.4945	15.1157	18.3572	13.7048	16.783	15.9402	14.1384	16.3966	2.02411	1.61762	1.95697	2.37665	1.77431	2.17284	2.06372	1.83045	2.12281
ENSG00000139132.14_6	protein_coding	FGD4	-0.589361	2.50265e-05	0.000214975	-1	-0.0274083	0.789136	0.896271	0	9.38053	14.1438	15.93	11.4452	16.9008	15.8253	11.6086	16.8888	17.0922	0.882541	1.33068	1.49873	1.07679	1.59006	1.48888	1.09216	1.58894	1.60807
ENSG00000230131.6_7	lncRNA	LINC02641	0.837784	0.007085	0.0227816	1	0.0821402	0.788256	0.895752	0	1.85491	0.799648	1.42505	1.79533	1.4084	0.729698	1.67487	0.965077	0.844674	0.348863	0.150395	0.268017	0.337658	0.264886	0.137239	0.315004	0.181508	0.158863
ENSG00000114125.14_3	protein_coding	RNF7	-0.251818	0.000351519	0.00195113	0	0.0155106	0.788313	0.895752	0	52.1494	61.6229	60.6662	49.8203	63.3237	64.8975	53.0762	61.5719	58.8787	16.8115	19.8655	19.5571	16.0607	20.4138	20.9212	17.1103	19.8491	18.9809
ENSG00000143252.14_2	protein_coding	SDHC	0.0413287	0.509895	0.632645	0	-0.00639661	0.918334	0.960891	0	77.4291	77.0661	81.0749	86.3104	81.1454	78.1233	81.4913	79.1845	79.2503	5.46816	5.44252	5.72563	6.09536	5.73061	5.51718	5.75503	5.59213	5.59677
ENSG00000162746.14_3	protein_coding	FCRLB	0.29778	0.272648	0.402439	0	0.254526	0.347044	0.570849	0	1.37793	1.19947	0.966995	1.21185	1.13755	1.14015	1.50161	1.59238	1.19248	0.531609	0.462759	0.373069	0.467533	0.43887	0.439874	0.579325	0.614343	0.460062
ENSG00000081721.11_2	protein_coding	DUSP12	0.0389121	0.650233	0.748943	0	0.0250237	0.77002	0.885784	0	28.1416	28.9872	27.1268	29.982	32.9348	32.5628	34.9991	30.2069	30.7064	15.9714	16.4513	15.3954	17.0159	18.6917	18.4806	19.8633	17.1435	17.427
ENSG00000118217.6_4	protein_coding	ATF6	-0.0810568	0.19709	0.316353	0	-0.0467376	0.44914	0.661998	0	67.0416	67.9201	71.2014	65.7987	68.6865	68.9108	67.7458	68.7617	72.0457	8.52513	8.63684	9.05409	8.36708	8.73429	8.76282	8.61467	8.74386	9.16146
ENSG00000162745.10_5	protein_coding	OLFML2B	-0.422579	0.043168	0.0970944	0	-0.0215343	0.909017	0.956125	0	2.38488	3.09864	2.7992	1.97486	2.92513	3.69409	2.71445	3.23301	2.88183	0.698354	0.907361	0.819677	0.57829	0.856555	1.08173	0.794861	0.946708	0.843873
ENSG00000198929.13_6	protein_coding	NOS1AP	0.0583356	0.705097	0.790618	0	0.0522439	0.734213	0.865498	0	4.92875	6.1473	6.05644	6.05923	4.76689	4.10455	5.37115	5.40443	5.66428	0.627547	0.782696	0.771128	0.771483	0.606937	0.522606	0.683874	0.688112	0.721197
ENSG00000254706.3_8	protein_coding	AL512785.2	0.194037	0.458126	0.585634	0	0.467857	0.0746921	0.217886	0	1.00695	1.5993	1.22147	1.52603	1.46257	1.18576	1.15509	1.44761	0.844674	0.859905	1.36575	1.0431	1.30318	1.24899	1.0126	0.98641	1.23622	0.721327
ENSG00000239887.6_6	protein_coding	C1orf226	-0.0184958	0.786872	0.852184	0	0.177119	0.0157697	0.0745897	0	27.4526	33.0854	29.1116	27.3787	29.0888	26.9532	27.3178	31.8475	27.1786	6.36509	7.6711	6.74974	6.34796	6.74446	6.24929	6.33382	7.38408	6.30156
ENSG00000152332.16_3	protein_coding	UHMK1	-0.0610145	0.523309	0.644908	0	0.0565902	0.553155	0.744713	0	307.65	345.648	334.835	326.884	356.379	327.862	326.081	340.238	339.459	33.2666	37.3754	36.2062	35.3465	38.5358	35.4522	35.2596	36.7904	36.7063
ENSG00000286619.1_1	lncRNA	AC119673.2	0.490382	0.0340577	0.0804446	0	0.624221	0.00834362	0.0467055	1	3.55082	3.04866	1.93399	3.94972	4.00852	2.69076	2.42568	3.95681	2.48433	0.569955	0.489351	0.310432	0.633984	0.643422	0.431904	0.389355	0.635123	0.39877
ENSG00000162733.18_4	protein_coding	DDR2	0.126453	0.544128	0.661972	0	-0.181944	0.399071	0.619313	0	2.33188	1.69925	2.13757	2.73787	2.32927	2.59955	2.71445	2.26793	2.38496	0.217202	0.158276	0.199103	0.255018	0.216959	0.242134	0.252836	0.211245	0.222146
ENSG00000131471.7_4	protein_coding	AOC3	0.407304	0.007331	0.023416	0	-0.0387577	0.785545	0.894443	0	7.79061	5.4476	6.26002	8.70734	5.57942	5.1991	6.64174	6.03173	6.11146	1.72206	1.20416	1.38374	1.9247	1.23329	1.14923	1.46811	1.33327	1.3509
ENSG00000224870.7_7	lncRNA	MRPL20-AS1	0.393662	7.953e-05	0.000563979	0	-0.0223214	0.782618	0.892797	0	36.7801	24.3393	26.058	31.1938	25.5137	26.3147	31.5338	24.706	23.3031	14.5549	9.6317	10.3118	12.3442	10.0964	10.4134	12.4788	9.77679	9.22163
ENSG00000143228.13_5	protein_coding	NUF2	-0.0336884	0.604557	0.711276	0	-0.056383	0.389152	0.610963	0	54.7462	56.6751	57.9688	57.2709	60.2903	61.2034	61.5661	53.8995	58.3819	16.2838	16.8575	17.2424	17.0348	17.9329	18.2045	18.3123	16.032	17.3652
ENSG00000111846.17_5	protein_coding	GCNT2	1.7537	0.000279602	0.0016114	1	-0.1424	0.782444	0.892756	0	0.79496	0.49978	0.305367	1.70556	0.216677	0.228031	1.27059	0.289523	0.59624	0.0876279	0.0550904	0.0336604	0.188003	0.0238841	0.0251356	0.140057	0.0319139	0.0657231
ENSG00000143198.13_3	protein_coding	MGST3	-0.0527628	0.402642	0.532827	0	0.0555302	0.376126	0.598442	0	42.9808	47.829	43.2603	42.28	45.8813	47.7496	43.8933	45.4551	42.8299	5.33791	5.94001	5.37262	5.25086	5.69812	5.93015	5.45122	5.64519	5.31917
ENSG00000007968.7_3	protein_coding	E2F2	0.193414	0.0037973	0.0138263	0	0.0164865	0.781954	0.89254	0	58.0851	51.3274	51.1998	60.2332	54.0608	54.8641	62.9522	54.9129	52.3698	10.6344	9.39718	9.37383	11.0277	9.89762	10.0447	11.5255	10.0536	9.58802
ENSG00000100949.14_2	protein_coding	RABGGTA	0.218891	0.00347989	0.0128963	0	0.193066	0.00832921	0.0466429	0	35.5082	32.0359	28.7554	33.6624	33.0432	29.2791	31.8804	34.212	28.8183	10.0164	9.03693	8.11153	9.49574	9.32107	8.25927	8.99305	9.65077	8.12927
ENSG00000163956.13_5	protein_coding	LRPAP1	0.188098	0.00361427	0.0132885	0	0.0159153	0.781513	0.892319	0	135.567	122.596	120.111	128.68	118.468	117.983	140.92	118.367	117.41	11.4732	10.3754	10.1651	10.8903	10.0261	9.98502	11.9262	10.0175	9.9365
ENSG00000236364.4_6	lncRNA	AL358115.1	-0.122607	0.773692	0.841954	0	0.654885	0.100912	0.263816	0	0.476976	0.799648	0.763417	0.942547	1.13755	0.592879	0.693051	1.73714	0.993734	0.161577	0.270884	0.25861	0.319291	0.38535	0.20084	0.234774	0.588461	0.336631
ENSG00000188859.6_3	protein_coding	FAM78B	0.582785	0.0221018	0.0568326	0	-0.0728207	0.772374	0.887225	0	2.64987	2.44892	2.18846	3.09694	1.57091	1.91546	3.69627	1.93015	2.18621	0.495951	0.458342	0.409594	0.579626	0.294012	0.358498	0.691797	0.361249	0.409174
ENSG00000215835.2_5	processed_pseudogene	AL596087.1	-0.0340375	0.930954	0.953304	0	0.15529	0.68561	0.835586	0	0.582971	1.09952	0.45805	0.538598	0.812537	1.18576	1.15509	0.6273	0.59624	0.296074	0.558414	0.232631	0.273539	0.412665	0.602214	0.586636	0.318588	0.302814
ENSG00000011426.11_6	protein_coding	ANLN	-0.177673	0.0151535	0.0419892	0	0.018674	0.780996	0.892317	0	275.798	328.106	320.941	274.954	321.169	319.836	296.337	321.177	317.2	45.9893	54.7116	53.5169	45.8487	53.5549	53.3326	49.4142	53.5564	52.8931
ENSG00000152382.6_3	protein_coding	TADA1	0.0177017	0.824351	0.880027	0	-0.0284782	0.721714	0.857641	0	21.8879	22.3402	25.4981	24.9102	23.6178	23.5784	24.1413	22.8241	21.0672	7.54755	7.70351	8.79246	8.58971	8.14405	8.13047	8.32458	7.87037	7.26454
ENSG00000264448.5_8	lncRNA	MIR378D2HG	1.09034	0.00718562	0.0230332	1	0.113922	0.781162	0.892317	0	1.53692	0.349846	1.01789	1.66068	1.08338	0.82091	2.13691	1.2546	0.645927	1.61952	0.368647	1.07259	1.74992	1.14161	0.865026	2.25175	1.32202	0.680639
ENSG00000116704.8_3	protein_coding	SLC35D1	-0.353903	0.000289717	0.00165975	0	0.0218365	0.78145	0.892317	0	25.1737	37.2336	33.0814	27.9622	33.0974	34.387	27.491	34.3085	35.6254	4.06487	6.01221	5.34174	4.51513	5.34432	5.55256	4.43905	5.53988	5.75252
ENSG00000215271.7_3	protein_coding	HOMEZ	-0.272045	0.000589053	0.00300482	0	-0.0182517	0.780425	0.891923	0	21.8349	26.5383	25.9053	22.666	25.4053	27.6829	21.8311	27.1669	26.5327	3.94559	4.79551	4.68111	4.09577	4.59077	5.00233	3.94491	4.90909	4.79449
ENSG00000197965.12_5	protein_coding	MPZL1	-0.0629572	0.227918	0.353057	0	0.00757504	0.882087	0.944077	0	118.661	126.544	126.167	118.312	128.814	130.661	127.579	127.342	123.819	16.7861	17.9013	17.848	16.7367	18.2224	18.4837	18.0477	18.0141	17.5158
ENSG00000143158.11_3	protein_coding	MPC2	-0.130189	0.084475	0.164338	0	-0.0960201	0.19347	0.398112	0	25.7037	28.2376	27.8393	28.052	27.1387	32.0155	26.3937	26.7809	27.8742	9.74363	10.7042	10.5532	10.6338	10.2876	12.1363	10.0052	10.152	10.5664
ENSG00000143164.15_3	protein_coding	DCAF6	-0.0762613	0.284923	0.415913	0	0.00474296	0.945888	0.974733	0	48.9695	54.526	54.0499	50.6731	57.1485	58.6494	59.6024	56.5535	54.9038	7.76555	8.64669	8.57119	8.0357	9.06255	9.30058	9.4517	8.9682	8.70659
ENSG00000126005.17_6	protein_coding	MMP24OS	0.341639	0.00121315	0.00544034	0	0.265085	0.00829424	0.0464651	0	31.6924	31.0863	23.1061	30.6552	27.2471	25.7674	30.8985	30.0139	24.6446	5.74138	5.63158	4.18589	5.55348	4.93607	4.66802	5.59756	5.4373	4.4646
ENSG00000143155.13_3	protein_coding	TIPRL	-0.0048826	0.932647	0.954379	0	-0.0783762	0.186173	0.388526	0	62.9608	63.2222	65.9083	63.5995	60.832	67.041	69.4206	62.0544	63.5493	19.7617	19.8438	20.6869	19.9622	19.0935	21.0424	21.7893	19.4772	19.9464
ENSG00000213064.10_3	protein_coding	SFT2D2	0.0644274	0.342425	0.47588	0	-0.0928792	0.177937	0.379124	0	107.85	101.555	110.085	116.517	100.7	96.0921	114.642	101.767	118.205	9.61483	9.0537	9.8141	10.3875	8.97749	8.56665	10.2204	9.0726	10.538
ENSG00000125508.3_2	protein_coding	SRMS	-0.336105	0.0124152	0.0358471	0	-0.033318	0.780238	0.89178	0	5.67071	8.14642	7.22702	5.83481	6.55447	7.88986	6.58399	7.5276	7.65175	3.74058	5.37363	4.76716	3.84882	4.32353	5.20439	4.343	4.96543	5.04733
ENSG00000014216.15_6	protein_coding	CAPN1	-0.211799	0.00127072	0.00565381	0	-0.0157562	0.780102	0.891765	0	328.848	380.733	382.828	310.637	356.758	374.745	320.132	361.711	353.719	43.5388	50.4081	50.6856	41.1276	47.234	49.6154	42.3847	47.8897	46.8317
ENSG00000143156.14_5	protein_coding	NME7	-0.180435	0.10435	0.194182	0	0.0282024	0.788289	0.895752	0	6.46567	8.34633	8.34669	7.85456	8.88374	8.80198	7.68132	8.2514	7.80081	1.13076	1.45966	1.45972	1.37365	1.55364	1.53935	1.34336	1.44306	1.36425
ENSG00000117475.14_3	protein_coding	BLZF1	-0.149847	0.0680164	0.138872	0	-0.0125403	0.871616	0.939098	0	25.4387	29.0872	30.1295	25.0897	29.6847	29.9176	28.8771	28.4215	27.8742	6.65935	7.61445	7.88731	6.56798	7.77086	7.83183	7.55946	7.44018	7.29692
ENSG00000057663.16_5	protein_coding	ATG5	-0.209051	0.0138021	0.0389982	0	0.0215357	0.779497	0.891286	0	34.5543	40.882	40.1557	32.8545	42.7936	42.4593	36.0387	37.638	36.7681	6.11039	7.22936	7.10093	5.80981	7.5674	7.50827	6.37289	6.6557	6.50188
ENSG00000000460.17_6	protein_coding	C1orf112	0.0124227	0.881277	0.91964	0	-0.223765	0.0147118	0.0712914	0	28.6186	22.84	29.6715	29.8024	25.947	25.6306	26.1049	23.1618	28.7189	4.79373	3.82579	4.9701	4.99203	4.34624	4.29324	4.37269	3.8797	4.81054
ENSG00000184900.15_2	protein_coding	SUMO3	-0.172905	0.0135347	0.0384185	0	0.0179061	0.778235	0.890533	0	38.2111	45.2301	44.2782	37.8365	44.9062	46.199	40.659	42.9942	40.9418	13.9865	16.5557	16.2072	13.8494	16.4371	16.9103	14.8825	15.7372	14.986
ENSG00000156256.15_5	protein_coding	USP16	-0.207603	0.00176346	0.00738241	0	0.0160973	0.778295	0.890533	0	67.5186	77.8657	76.1381	65.3499	80.6579	80.4492	71.442	79.9083	79.1509	11.8579	13.6751	13.3716	11.477	14.1654	14.1288	12.5469	14.0338	13.9008
ENSG00000000457.14_4	protein_coding	SCYL3	0.0432383	0.675231	0.767728	0	0.127914	0.220356	0.433074	0	16.3762	17.3923	17.5077	17.9533	18.6884	15.05	17.4418	18.8672	17.7878	2.37922	2.52686	2.54361	2.60835	2.71515	2.18655	2.53404	2.74114	2.58431
ENSG00000075945.13_3	protein_coding	KIFAP3	-0.217072	0.0283056	0.0693158	0	-0.0893968	0.334189	0.558958	0	14.6273	16.3428	16.6425	13.5547	17.0633	16.6918	16.229	15.0069	18.1356	2.93838	3.28301	3.34321	2.72293	3.42774	3.35312	3.26014	3.01465	3.64316
ENSG00000125629.15_3	protein_coding	INSIG2	-0.0431083	0.628354	0.731508	0	0.25354	0.0082805	0.0464137	0	15.2102	18.242	15.0139	15.8438	20.9635	17.4215	15.3049	17.8539	15.3035	3.85069	4.61822	3.80098	4.01108	5.30721	4.41051	3.87465	4.51998	3.8743
ENSG00000254057.1_6	lncRNA	AC084346.1	1.28399	0.000107009	0.000720602	1	0.0861406	0.778061	0.890533	0	2.0139	0.799648	0.916101	1.39138	0.65003	0.638485	2.13691	0.916823	0.695614	3.8142	1.51449	1.73504	2.63519	1.23112	1.20925	4.04717	1.73641	1.31745
ENSG00000117523.16_5	protein_coding	PRRC2C	-0.0287409	0.810269	0.869293	0	-0.11143	0.357476	0.58035	0	380.892	380.333	431.738	442.324	374.038	334.794	405.089	405.622	486.88	26.8745	26.835	30.462	31.2089	26.3909	23.622	28.5817	28.6193	34.3526
ENSG00000132436.11_7	protein_coding	FIGNL1	0.480324	1.40226e-05	0.000131658	0	0.0238275	0.778174	0.890533	0	58.986	41.2818	41.8353	61.1758	46.4771	45.6517	59.2559	43.0907	41.0909	11.7175	8.2006	8.31054	12.1525	9.23265	9.06868	11.7711	8.55993	8.16267
ENSG00000010165.20_4	protein_coding	EEF1AKNMT	-0.0439691	0.498815	0.62216	0	0.0369338	0.567958	0.754784	0	83.8418	81.4142	83.925	70.4217	84.1247	80.7684	78.6613	80.6321	75.2256	21.8851	21.2514	21.9068	18.3821	21.9589	21.0829	20.5328	21.0473	19.636
ENSG00000197959.14_5	protein_coding	DNM3	0.235002	0.380528	0.512401	0	0.187513	0.483978	0.691485	0	2.11989	1.69925	1.62862	3.09694	2.38344	2.05227	2.0214	2.99174	2.53402	0.187121	0.149991	0.143757	0.273364	0.210384	0.181152	0.178427	0.264078	0.223676
ENSG00000133142.17_5	protein_coding	TCEAL4	-0.453	7.63544e-06	7.85927e-05	0	-0.0204335	0.77853	0.890533	0	21.3049	27.7378	28.5009	22.1723	30.7139	31.8787	22.6397	30.7859	30.0604	8.46105	11.0158	11.3189	8.80552	12.1977	12.6603	8.99114	12.2263	11.9382
ENSG00000151414.15_4	protein_coding	NEK7	-0.243531	0.00870046	0.0269724	0	0.023423	0.777303	0.89013	0	26.3927	34.5348	33.0305	28.2764	33.0432	30.0088	28.2996	32.2818	35.2775	4.83914	6.33201	6.0562	5.18453	6.05852	5.50217	5.18878	5.91892	6.4682
ENSG00000047644.18_3	protein_coding	WWC3	-0.269058	0.012882	0.0370094	0	0.0274667	0.77702	0.890005	0	17.2241	23.7895	20.1033	16.7863	18.9592	18.4705	15.9402	18.626	21.7131	2.42116	3.34404	2.82588	2.35962	2.66506	2.59636	2.24068	2.61821	3.05216
ENSG00000133627.18_3	protein_coding	ACTR3B	-0.518824	7.91076e-05	0.000561535	0	0.0285478	0.774753	0.888678	0	12.1364	17.7922	15.0648	11.535	16.1424	16.9199	9.52946	14.7657	15.701	2.01467	2.95355	2.50079	1.91484	2.67968	2.80874	1.58192	2.45114	2.60641
ENSG00000203739.4_6	lncRNA	AL645568.1	0.191298	0.405491	0.535865	0	0.143645	0.532166	0.727785	0	1.69591	1.64927	1.57773	2.28904	1.73341	1.505	1.3861	1.8819	1.68935	0.353537	0.343814	0.328899	0.477182	0.361354	0.313738	0.288952	0.392308	0.352167
ENSG00000117592.9_3	protein_coding	PRDX6	0.0103554	0.837445	0.889161	0	0.0803771	0.123104	0.300465	0	316.553	342.05	315.444	323.114	342.241	338.717	327.813	331.311	306.318	136.977	148.009	136.497	139.816	148.092	146.567	141.849	143.363	132.548
ENSG00000076321.11_4	protein_coding	KLHL20	-0.132595	0.157385	0.267109	0	-0.0922334	0.316546	0.541048	0	20.245	20.9408	22.3936	21.9479	23.8344	24.8097	22.0621	21.3764	23.2037	4.77026	4.93421	5.27652	5.17151	5.61603	5.84583	5.19843	5.03686	5.46741
ENSG00000120334.15_2	protein_coding	CENPL	0.177581	0.0762515	0.151856	0	0.198358	0.049335	0.164804	0	21.3579	19.8913	18.4238	21.3195	24.2678	18.4249	23.3327	22.7758	21.4646	4.34634	4.04787	3.74925	4.33853	4.9385	3.74946	4.74822	4.63488	4.36806
ENSG00000169231.13_3	protein_coding	THBS3	0.565133	0.000747038	0.00363851	0	-0.0428746	0.774087	0.888077	0	9.59252	4.74791	7.07433	9.78453	7.04199	5.15349	8.48988	6.56252	6.7077	2.07496	1.02702	1.53025	2.11649	1.52325	1.11475	1.83644	1.41954	1.45094
ENSG00000234741.8_7	lncRNA	GAS5	-0.0388274	0.602452	0.709598	0	0.185291	0.0204778	0.0900138	0	179.343	187.917	172.532	188.105	221.227	181.74	163.849	211.786	191.741	37.039	38.8099	35.6324	38.8487	45.6891	37.5341	33.8391	43.7394	39.5995
ENSG00000185278.15_4	protein_coding	ZBTB37	-0.00531633	0.974436	0.982882	0	-0.0393809	0.812645	0.90888	0	23.8488	21.9403	25.6508	28.5008	26.0012	18.288	23.6215	26.4914	32.7435	1.22528	1.12723	1.31786	1.46428	1.33586	0.939583	1.2136	1.36104	1.68226
ENSG00000144746.7_3	protein_coding	ARL6IP5	-0.199467	0.00903483	0.0278458	0	-0.0198552	0.772345	0.887225	0	35.8792	38.8329	39.4941	32.3608	41.7103	42.0488	36.5585	38.024	38.5569	14.0427	15.1988	15.4576	12.6657	16.325	16.4575	14.3086	14.8822	15.0907
ENSG00000152061.23_4	protein_coding	RABGAP1L	-0.157666	0.0957469	0.181305	0	-0.0712314	0.434134	0.649626	0	14.8923	16.1929	17.7622	16.7863	14.7882	17.0567	14.7273	18.3365	17.0922	0.926654	1.00758	1.10523	1.04451	0.920178	1.06133	0.916392	1.14097	1.06354
ENSG00000131828.13_3	protein_coding	PDHA1	-0.180853	0.00369343	0.0135073	0	-0.0158963	0.77238	0.887225	0	101.119	116.149	115.48	101.795	113.539	118.986	103.034	113.3	112.292	22.5059	25.8511	25.7021	22.6564	25.2701	26.4826	22.932	25.217	24.9926
ENSG00000120333.4_3	protein_coding	MRPS14	0.107248	0.163088	0.274271	0	-0.142917	0.0722122	0.21302	0	22.2589	18.0421	21.5284	23.1148	18.58	21.0244	21.3691	19.5428	19.4772	8.58091	6.95531	8.29929	8.91089	7.16269	8.10502	8.23789	7.53385	7.50855
ENSG00000143570.18_5	protein_coding	SLC39A1	1.03009	5.54898e-06	5.9537e-05	1	-0.0543535	0.772257	0.887225	0	4.34578	1.94914	2.34115	4.84738	2.05843	1.96106	4.10055	2.26793	2.2359	1.2827	0.575308	0.691011	1.43075	0.607564	0.578826	1.21032	0.669401	0.659947
ENSG00000100263.14_4	protein_coding	RHBDD3	0.475866	4.63764e-06	5.07013e-05	0	0.0224128	0.771958	0.887225	0	33.4413	25.3389	25.1419	35.0986	22.2094	23.624	33.382	26.8291	24.5949	11.1583	8.45474	8.38901	11.7113	7.41053	7.88254	11.1385	8.95199	8.20651
ENSG00000242193.11_5	transcribed_unitary_pseudogene	CRYZL2P	-0.191825	0.137926	0.240927	0	0.139733	0.257972	0.475392	0	4.92875	6.39719	5.70018	5.0718	7.47534	6.52167	5.94869	6.17649	5.91272	0.8963	1.16334	1.03659	0.922313	1.3594	1.18597	1.08178	1.1232	1.07523
ENSG00000187954.12_4	protein_coding	CYHR1	0.314718	0.00242555	0.00954545	0	-0.0266982	0.77164	0.887013	0	62.2719	46.9793	47.3319	66.2027	46.2605	44.7852	53.9425	50.9078	54.8541	6.36271	4.80018	4.8362	6.76435	4.72673	4.57599	5.51165	5.20157	5.60479
ENSG00000213058.3_5	processed_pseudogene	AL365357.1	-0.085958	0.837466	0.889161	0	-0.107032	0.79842	0.900985	0	0.423979	0.649714	0.508945	0.538598	0.487522	0.410455	0.750806	0.530792	0.89436	1.18762	1.81993	1.42562	1.50868	1.36561	1.14973	2.1031	1.48681	2.50521
ENSG00000116191.17_6	protein_coding	RALGPS2	0.00970473	0.910463	0.940037	0	0.170522	0.0580438	0.184094	0	28.3006	35.1845	31.351	36.3105	39.2726	32.4715	34.5371	36.5764	34.7807	3.08352	3.83357	3.41589	3.95625	4.279	3.53798	3.76303	3.98523	3.78957
ENSG00000116199.12_4	protein_coding	FAM20B	-0.186524	0.0261127	0.0648174	0	-0.0886777	0.263208	0.481719	0	93.0103	100.606	106.624	91.9656	105.738	112.373	103.034	101.719	108.516	15.3838	16.6401	17.6354	15.211	17.489	18.5864	17.0416	16.8242	17.9483
ENSG00000173511.9_4	protein_coding	VEGFB	0.28525	0.000665586	0.00332701	0	0.0207977	0.77159	0.887013	0	38.9	29.7369	32.4198	38.2405	33.5307	31.5594	38.0601	32.6678	30.5573	25.178	19.2472	20.9837	24.7511	21.7027	20.4268	24.6344	21.1442	19.7782
ENSG00000143322.21_5	protein_coding	ABL2	0.0364646	0.660791	0.756636	0	0.111734	0.187	0.389577	0	75.7332	80.5646	71.9648	78.77	78.4911	67.9987	76.7554	84.589	85.6598	4.53791	4.8274	4.31211	4.71987	4.70316	4.07446	4.59916	5.06855	5.13271
ENSG00000246695.8_6	lncRNA	RASSF8-AS1	0.692808	0.00180851	0.00754733	1	0.0597197	0.771258	0.886926	0	3.02085	1.69925	1.47594	2.46858	1.84175	1.64182	2.88771	1.83365	2.03715	0.266954	0.150164	0.130429	0.218149	0.162756	0.145088	0.255189	0.16204	0.180024
ENSG00000162779.22_6	protein_coding	AXDND1	-0.456906	0.0795251	0.156908	0	-0.337315	0.17972	0.381517	0	1.16594	0.99956	1.57773	1.03231	1.08338	1.505	0.866314	1.2546	1.14279	0.191483	0.164158	0.259111	0.169537	0.177925	0.247167	0.142275	0.206044	0.187682
ENSG00000169905.12_3	protein_coding	TOR1AIP2	0.0556004	0.301068	0.432797	0	-0.0210563	0.691762	0.839669	0	207.326	201.561	201.186	209.38	199.18	197.566	211.438	194.897	205.653	10.9836	10.6782	10.6583	11.0924	10.552	10.4665	11.2014	10.3251	10.895
ENSG00000143337.18_5	protein_coding	TOR1AIP1	-0.084154	0.18923	0.306692	0	-0.0507636	0.420444	0.637994	0	67.9956	73.7676	75.3238	68.0429	72.3158	74.566	72.4816	67.2658	71.052	7.07182	7.67213	7.83399	7.07675	7.52115	7.75517	7.53839	6.99593	7.3897
ENSG00000135837.16_6	protein_coding	CEP350	0.0242264	0.836855	0.888969	0	-0.068567	0.562335	0.750364	0	82.2519	81.7141	91.4065	96.4988	91.1667	77.3936	96.7384	85.554	102.305	5.76761	5.7299	6.40954	6.76663	6.39273	5.42694	6.78342	5.99916	7.17375
ENSG00000118503.15_5	protein_coding	TNFAIP3	0.382932	0.0120292	0.0350057	0	-0.0422133	0.770935	0.886625	0	5.29973	3.74835	3.91887	5.47575	3.521	4.24137	5.31339	4.68062	4.17368	1.05467	0.745941	0.779876	1.0897	0.700696	0.844053	1.05739	0.931467	0.830583
ENSG00000143256.5_3	protein_coding	PFDN2	-0.285332	0.000425051	0.00228366	0	-0.0195414	0.770005	0.885784	0	61.5829	76.2165	76.5962	59.8742	72.1533	74.7028	59.7757	69.5338	69.5614	99.1673	122.732	123.343	96.4157	116.189	120.294	96.2571	111.971	112.015
ENSG00000230124.8_5	protein_coding	ACBD6	0.139081	0.205677	0.327175	0	0.191125	0.0863674	0.238905	0	21.5699	21.3406	18.9327	21.1849	21.9385	19.8387	21.3113	23.1136	19.3778	2.87139	2.84087	2.52033	2.82014	2.92046	2.64093	2.83697	3.07689	2.57958
ENSG00000172830.13_5	protein_coding	SSH3	0.545137	9.53879e-07	1.30231e-05	0	-0.0229425	0.769756	0.885692	0	67.4656	40.4822	43.4639	64.5869	43.4437	42.961	61.6238	46.7097	46.3577	18.6834	11.2108	12.0365	17.8862	12.0309	11.8972	17.0656	12.9354	12.8379
ENSG00000135835.12_4	protein_coding	KIAA1614	0.205356	0.291136	0.422419	0	0.281622	0.148918	0.339232	0	3.17984	2.64883	2.39204	2.37881	2.43761	2.14349	2.36793	3.23301	2.33527	0.304233	0.253429	0.22886	0.227594	0.23322	0.205079	0.226552	0.309319	0.223428
ENSG00000243155.1_7	lncRNA	AL162431.2	0.235524	0.552716	0.669373	0	0.404294	0.301657	0.525559	0	0.79496	0.49978	0.508945	0.897664	1.46257	0.501667	0.635297	0.723807	0.993734	0.327954	0.20618	0.209961	0.370323	0.603369	0.206958	0.262086	0.2986	0.409956
ENSG00000135823.14_4	protein_coding	STX6	0.102921	0.0724487	0.145898	0	-0.039965	0.470535	0.680868	0	54.8522	50.8776	52.574	55.8347	51.2982	52.8575	57.0612	49.7497	50.7301	8.46877	7.85512	8.11703	8.62045	7.92005	8.1608	8.80982	7.68098	7.83235
ENSG00000153029.14_2	protein_coding	MR1	-0.272018	0.0289743	0.0706298	0	-0.159072	0.177823	0.378937	0	8.63857	8.79613	8.95743	9.47035	10.7255	12.2224	8.77865	9.65077	11.2789	0.924108	0.940964	0.958219	1.01309	1.14736	1.30749	0.939094	1.03239	1.20656
ENSG00000198719.9_4	protein_coding	DLL1	0.0934208	0.580637	0.691065	0	0.474575	0.00828184	0.0464137	0	5.29973	7.19683	4.47871	4.84738	5.95861	5.10788	4.21606	5.59744	3.87556	1.38773	1.88448	1.17275	1.26928	1.56025	1.33749	1.10397	1.46568	1.01481
ENSG00000169857.8_4	protein_coding	AVEN	-0.412663	0.000465213	0.00246276	0	-0.0278944	0.769518	0.885559	0	9.22154	12.3945	11.5022	8.97664	11.1588	11.812	8.54763	11.3879	12.3223	5.02262	6.75084	6.26479	4.88924	6.0778	6.43354	4.65557	6.20256	6.71149
ENSG00000112218.9_3	protein_coding	GPR63	0.283682	0.0117499	0.0343872	0	0.0306822	0.769456	0.885558	0	12.7724	12.1946	11.095	14.991	12.2422	11.9944	16.1134	12.353	12.9185	2.1405	2.04368	1.85939	2.51231	2.05166	2.01012	2.70043	2.07022	2.165
ENSG00000102878.16_3	protein_coding	HSF4	0.591849	0.00870611	0.0269731	1	-0.0632377	0.769424	0.885558	0	11.8714	4.84787	6.87075	10.1436	7.36701	4.92546	8.77865	7.38284	8.74486	3.51537	1.43555	2.03457	3.00373	2.18152	1.45853	2.59954	2.18621	2.58953
ENSG00000157881.14_5	protein_coding	PANK4	-0.192453	0.0136544	0.0386744	0	-0.0207741	0.769204	0.88541	0	28.9365	32.1359	32.0126	27.2441	28.0055	31.9243	27.0868	33.5364	31.2032	5.66384	6.29005	6.26593	5.33257	5.48159	6.24863	5.30177	6.56418	6.1075
ENSG00000135829.17_3	protein_coding	DHX9	-0.0598865	0.268331	0.397565	0	-0.144916	0.0127013	0.06425	0	533.471	546.759	574.395	553.769	501.931	573.178	565.761	509.657	575.471	90.4495	92.7025	97.3881	93.8909	85.102	97.1817	95.9242	86.4118	97.5706
ENSG00000135862.6_3	protein_coding	LAMC1	0.0909884	0.226113	0.351053	0	0.0479099	0.517866	0.71812	0	131.857	138.989	130.799	142.055	120.797	115.885	130.756	133.036	133.508	15.6118	16.4562	15.4865	16.8192	14.3023	13.7207	15.4814	15.7513	15.8073
ENSG00000156042.18_5	protein_coding	CFAP70	0.462294	0.017843	0.0479413	0	-0.0554534	0.769116	0.885405	0	5.9887	3.29855	2.85009	4.30879	3.14181	3.28364	3.69627	3.32951	4.02462	0.805799	0.443831	0.383489	0.579761	0.422741	0.441824	0.497346	0.447997	0.541526
ENSG00000232860.8_5	lncRNA	SMG7-AS1	0.370324	0.195089	0.31393	0	0.0935268	0.744764	0.870873	0	2.27889	1.19947	1.11968	1.75044	2.16677	1.91546	2.42568	1.93015	1.88809	0.673629	0.354559	0.330972	0.517424	0.640487	0.566201	0.71702	0.570545	0.558112
ENSG00000116698.21_4	protein_coding	SMG7	0.135569	0.0336992	0.0797496	0	0.0934837	0.130587	0.311983	0	176.958	178.621	166.679	189.003	175.4	167.238	185.622	181.724	168.239	21.2767	21.4767	20.0408	22.7249	21.0893	20.1079	22.3184	21.8497	20.2283
ENSG00000162704.16_4	protein_coding	ARPC5	0.0148967	0.777491	0.845109	0	0.127792	0.0237264	0.100116	0	129.578	143.037	129.883	137.612	148.694	141.105	137.34	145.775	129.334	12.167	13.4307	12.1956	12.9213	13.9619	13.2493	12.8957	13.6878	12.1441
ENSG00000254986.7_6	protein_coding	DPP3	-0.180286	0.00775457	0.0245086	0	-0.0178611	0.769118	0.885405	0	70.3275	80.1148	81.7874	67.998	78.8703	83.0943	76.4089	81.1147	78.2068	17.6835	20.1445	20.5651	17.0978	19.8316	20.8937	19.2127	20.3959	19.6648
ENSG00000176533.13_4	protein_coding	GNG7	0.583201	3.46577e-06	3.9227e-05	0	0.0275072	0.769139	0.885405	0	23.6368	16.7426	15.6755	23.429	14.8423	16.2814	23.3327	16.2615	15.0054	5.19947	3.68294	3.4482	5.15377	3.26493	3.58147	5.13258	3.57711	3.30079
ENSG00000075218.19_4	protein_coding	GTSE1	0.172648	0.00961408	0.0292578	0	0.0179238	0.768143	0.884753	0	108.645	99.2563	92.0681	100.808	87.6999	90.3001	100.435	91.3445	92.5663	26.4149	24.1323	22.3847	24.5095	21.3226	21.9548	24.4188	22.2087	22.5058
ENSG00000116406.19_5	protein_coding	EDEM3	-0.22435	0.0198389	0.0521769	0	-0.182678	0.0514176	0.169563	0	47.6446	50.078	53.5919	47.5313	47.3438	55.0922	47.705	49.6049	58.2328	6.11455	6.42684	6.87781	6.10001	6.07596	7.07035	6.12231	6.36614	7.47341
ENSG00000164695.5_3	protein_coding	CHMP4C	-0.323875	0.00158368	0.00678565	0	-0.0255516	0.768132	0.884753	0	13.9383	15.7431	15.9809	13.5098	15.2215	16.6006	11.2621	16.7441	15.9991	7.52608	8.50058	8.62898	7.29473	8.21897	8.96362	6.08104	9.04108	8.63883
ENSG00000121481.11_3	protein_coding	RNF2	-0.156611	0.0241515	0.0609959	0	-0.125993	0.0626208	0.193356	0	33.4943	35.0846	38.6798	37.0735	37.7017	39.5861	34.5371	34.7428	39.004	8.57509	8.98222	9.90266	9.49143	9.65226	10.1347	8.84205	8.89471	9.98567
ENSG00000230202.1_5	processed_pseudogene	AL450405.1	0.816088	0.0127707	0.0367412	1	-0.0981319	0.767631	0.884541	0	2.96785	0.899604	1.17057	1.21185	1.19172	1.27697	2.54119	1.39936	1.29185	6.26129	1.8979	2.46956	2.55664	2.51418	2.69403	5.36116	2.95224	2.72543
ENSG00000116668.13_7	protein_coding	SWT1	0.247176	0.202157	0.322641	0	0.385166	0.0507645	0.167978	0	6.41268	4.89785	4.22424	5.29622	6.98782	5.15349	4.50483	6.03173	4.27305	1.57637	1.20399	1.03841	1.30192	1.71775	1.26684	1.10738	1.48273	1.05041
ENSG00000116679.16_3	protein_coding	IVNS1ABP	-0.0508339	0.373233	0.505468	0	-0.116952	0.0499991	0.166209	0	127.724	114.6	126.371	122.935	121.285	130.753	121.284	119.428	128.142	16.223	14.556	16.0512	15.6148	15.4051	16.6077	15.4051	15.1693	16.2761
ENSG00000260404.3_5	transcribed_unprocessed_pseudogene	AC110079.1	0.352916	0.0145941	0.0407997	0	0.0401378	0.767329	0.884453	0	16.9591	10.8952	13.5379	15.4847	12.1339	9.48607	14.092	14.4279	13.5645	3.83518	2.46386	3.06149	3.50174	2.74398	2.1452	3.1868	3.26275	3.0675
ENSG00000047410.14_3	protein_coding	TPR	0.0262738	0.73321	0.812482	0	0.00515731	0.94657	0.975014	0	322.224	334.353	336.005	361.399	340.236	307.841	353.11	347.138	374.339	26.091	27.0731	27.2069	29.2631	27.5495	24.9264	28.5919	28.1083	30.3109
ENSG00000157181.16_5	protein_coding	ODR4	0.104829	0.206323	0.328022	0	0.0183861	0.8214	0.911958	0	35.3492	29.6869	29.7224	35.2782	34.6141	33.6573	32.1691	32.6678	32.2467	8.67892	7.28872	7.29742	8.66147	8.49843	8.26352	7.89814	8.02058	7.91718
ENSG00000172889.16_3	protein_coding	EGFL7	0.621408	1.33829e-06	1.73319e-05	1	0.0271176	0.767331	0.884453	0	69.1085	47.3792	42.8023	67.1452	41.4936	44.4203	61.1618	41.9326	41.1406	26.9534	18.4786	16.6935	26.1877	16.1831	17.3246	23.854	16.3544	16.0455
ENSG00000281649.2_5	lncRNA	EBLN3P	0.229398	0.00439624	0.0156415	0	0.0213633	0.766913	0.884254	0	81.7749	73.3177	72.0666	87.0285	73.02	71.8296	85.7651	74.0696	73.2879	7.79402	6.98797	6.86872	8.29475	6.95959	6.84613	8.17433	7.05963	6.98512
ENSG00000285280.2_3	lncRNA	AL390957.1	-0.494476	0.191339	0.309103	0	-0.453549	0.225748	0.44006	0	0.953952	0.849626	1.06878	1.03231	1.13755	0.912122	0.750806	0.868569	1.93778	0.0944694	0.0841381	0.105841	0.102229	0.112651	0.090327	0.0743519	0.086014	0.191897
ENSG00000178425.14_4	protein_coding	NT5DC1	0.155986	0.0108303	0.0321918	0	-0.0166585	0.766538	0.884033	0	66.4587	58.7242	60.8698	68.0878	60.7778	62.7084	68.9009	60.9928	58.9781	9.0952	8.0367	8.33034	9.31816	8.31775	8.58196	9.42943	8.34718	8.07145
ENSG00000263126.1_7	lncRNA	AC040162.3	1.13576	0.00194249	0.00796592	1	0.107036	0.765969	0.883448	0	2.17289	0.74967	0.610734	2.28904	0.975045	0.592879	1.3861	1.15809	1.4906	0.556153	0.191879	0.156318	0.585882	0.249564	0.151748	0.354774	0.296415	0.38152
ENSG00000074855.11_4	protein_coding	ANO8	0.372114	0.000533283	0.00276132	0	0.0273765	0.765228	0.882992	0	39.006	29.8369	32.1653	40.0358	27.9513	24.6273	33.5552	30.979	30.5076	7.79341	5.96141	6.42663	7.99916	5.58467	4.92054	6.70434	6.1896	6.09543
ENSG00000062038.14_4	protein_coding	CDH3	-0.516536	1.84893e-08	4.63228e-07	0	0.016454	0.765127	0.882974	0	155.547	224.801	211.772	144.12	205.843	214.85	142.653	209.325	206.1	25.6003	36.9982	34.8538	23.7195	33.878	35.3605	23.4781	34.4511	33.9204
ENSG00000111266.8_5	protein_coding	DUSP16	-0.806831	1.8268e-08	4.5848e-07	-1	-0.242319	0.00827488	0.0464107	0	14.5743	21.1407	24.1749	14.0933	19.9884	24.8553	13.8033	21.666	25.2905	2.54617	3.69334	4.22342	2.46215	3.49204	4.3423	2.41147	3.78511	4.41833
ENSG00000286285.1_1	lncRNA	AL138778.1	0.545235	0.148289	0.254909	0	0.530407	0.158883	0.353449	0	1.05995	0.549758	0.865206	1.21185	1.19172	0.684092	0.981823	1.49587	0.695614	0.261715	0.135743	0.213631	0.299221	0.294252	0.168911	0.242425	0.36935	0.171756
ENSG00000066279.18_4	protein_coding	ASPM	0.228321	0.058006	0.122506	0	-0.121704	0.29783	0.521094	0	137.846	113.95	129.628	156.014	124.102	106.673	153.8	113.3	146.079	12.6604	10.4656	11.9056	14.329	11.398	9.79727	14.1256	10.406	13.4165
ENSG00000177888.7_2	protein_coding	ZBTB41	-0.101533	0.351803	0.485095	0	0.0594138	0.57964	0.762097	0	36.1972	42.4313	39.5959	39.9012	43.6603	39.8597	38.5799	42.2221	43.6746	4.22765	4.95577	4.62461	4.66026	5.09932	4.65542	4.50594	4.93134	5.10098
ENSG00000169609.14_3	protein_coding	C15orf40	0.277837	0.00814089	0.0255228	0	-0.0290041	0.764486	0.882582	0	22.3119	16.4927	15.7773	22.9802	18.6884	20.9332	22.6974	19.7841	19.2784	1.60529	1.18661	1.13514	1.65337	1.34458	1.50609	1.63303	1.42342	1.38704
ENSG00000203724.11_3	protein_coding	C1orf53	-0.23169	0.351887	0.485152	0	0.274019	0.245345	0.461795	0	1.69591	2.09908	1.52683	1.0772	2.1126	1.73303	1.44386	1.73714	1.63966	2.7005	3.34248	2.43126	1.71528	3.36401	2.75961	2.29914	2.76614	2.61092
ENSG00000140941.13_3	protein_coding	MAP1LC3B	-0.268637	0.000374346	0.00205622	0	-0.0186476	0.764443	0.882582	0	77.2701	91.3098	93.6967	72.5312	94.3627	98.5092	81.2603	88.9318	85.8586	15.3405	18.1278	18.6017	14.3997	18.7339	19.5571	16.1327	17.6557	17.0456
ENSG00000171823.7_3	protein_coding	FBXL14	-0.244393	0.0120591	0.0350716	0	-0.0263594	0.76362	0.881937	0	23.2128	24.7391	26.516	19.4344	23.0761	25.0834	20.445	25.4298	23.0546	8.5878	9.15247	9.80985	7.18994	8.5372	9.27982	7.56382	9.40798	8.52927
ENSG00000162702.8_3	protein_coding	ZNF281	-0.0884534	0.234683	0.360808	0	-0.14725	0.0556596	0.179011	0	54.6403	59.4239	61.9895	62.9711	55.3067	65.536	63.6452	59.2557	65.1889	11.1625	12.1397	12.6638	12.8644	11.2986	13.3883	13.0021	12.1054	13.3175
ENSG00000118193.12_3	protein_coding	KIF14	-0.085806	0.371652	0.50407	0	-0.00785505	0.933911	0.968614	0	83.6828	91.01	94.1039	89.4073	94.5252	89.5704	90.9052	93.1299	96.5412	11.4728	12.4774	12.9015	12.2577	12.9593	12.28	12.463	12.768	13.2357
ENSG00000118197.14_7	protein_coding	DDX59	-0.215363	0.0306018	0.073861	0	0.0828323	0.368612	0.590588	0	13.6733	20.2411	18.2202	16.4272	17.7675	19.2914	15.8824	18.5777	15.8997	3.10052	4.58982	4.13157	3.725	4.02891	4.37446	3.60146	4.21264	3.60538
ENSG00000183401.12_6	protein_coding	CCDC159	0.793236	0.00954918	0.0291156	1	0.0898533	0.763111	0.881702	0	3.02085	1.19947	2.03578	3.36624	2.16677	1.4594	3.69627	2.79872	2.33527	0.743319	0.295146	0.50093	0.828307	0.533161	0.359103	0.909516	0.688662	0.574625
ENSG00000102034.16_2	protein_coding	ELF4	0.350172	7.87383e-06	8.05867e-05	0	0.0176956	0.762342	0.881519	0	68.5256	52.227	54.8642	67.998	55.0359	52.1734	70.8067	57.3255	55.5994	15.8771	12.1008	12.7118	15.7549	12.7516	12.0884	16.4056	13.2821	12.8822
ENSG00000102471.14_4	protein_coding	NDFIP2	-0.251262	0.00296429	0.0112929	0	-0.0223925	0.761421	0.880807	0	47.8036	54.0762	53.9481	50.1794	61.3737	62.982	48.2826	56.1192	57.1397	9.57221	10.8282	10.8026	10.0479	12.2895	12.6115	9.66812	11.2373	11.4417
ENSG00000198890.8_4	protein_coding	PRMT6	-0.413995	0.00205494	0.00833703	0	0.0342657	0.760898	0.880481	0	7.9496	13.0942	12.6218	9.42547	13.0548	12.7697	9.4717	10.5676	10.3845	1.83382	3.02059	2.91161	2.17427	3.01148	2.94572	2.18494	2.43774	2.39551
ENSG00000104915.15_5	protein_coding	STX10	0.0207342	0.771829	0.840624	0	-0.209756	0.00826558	0.0463766	0	85.8557	75.3668	87.8948	87.1631	70.3657	86.5604	88.7683	77.3026	83.573	47.8038	41.9637	48.9392	48.5318	39.1791	48.1962	49.4256	43.0416	46.5329
ENSG00000282221.1_6	lncRNA	AC119427.1	0.243523	0.259779	0.388564	0	-0.148811	0.503831	0.707275	0	1.64292	1.69925	1.47594	2.24416	1.35423	1.68743	2.07915	1.49587	1.88809	2.95489	3.05621	2.65457	4.03626	2.43566	3.03494	3.73949	2.69041	3.39585
ENSG00000159173.19_4	protein_coding	TNNI1	0.37407	0.0479213	0.105371	0	-0.0714718	0.701637	0.845178	0	3.55082	2.9487	2.7992	4.44344	3.30432	4.05894	5.37115	3.52253	3.37869	0.471933	0.391906	0.372036	0.590568	0.43917	0.539466	0.713869	0.468172	0.449056
ENSG00000128849.10_2	protein_coding	CGNL1	-0.941332	2.82458e-05	0.000238931	-1	-0.479509	0.00826235	0.0463765	0	2.22589	4.04822	4.93676	2.91741	3.30432	4.60622	3.11873	4.00507	6.3599	0.256942	0.4673	0.569868	0.336766	0.381429	0.531711	0.360006	0.462319	0.734145
ENSG00000178814.17_4	protein_coding	OPLAH	0.710022	9.24511e-08	1.80781e-06	1	-0.0266777	0.76083	0.880481	0	58.668	31.1863	34.3029	55.5654	32.9348	30.7385	52.0366	35.6596	36.7185	13.2105	7.02236	7.72413	12.5119	7.41609	6.92153	11.7173	8.02963	8.26806
ENSG00000224536.2_7	lncRNA	AC096677.1	0.351186	0.226637	0.351677	0	-0.0690858	0.816889	0.910452	0	2.0669	1.69925	1.62862	1.79533	1.24589	1.09455	1.27059	0.916823	1.34154	1.36339	1.12088	1.07429	1.18425	0.821828	0.721996	0.838123	0.604764	0.884921
ENSG00000223396.4_6	transcribed_processed_pseudogene	RPS10P7	0.281638	0.236264	0.36226	0	0.0626981	0.792018	0.897637	0	4.50477	3.29855	2.59562	2.78276	2.1126	2.37152	2.42568	2.89523	3.03089	1.49264	1.09296	0.860046	0.922053	0.699999	0.785791	0.803738	0.959321	1.00427
ENSG00000161558.11_5	protein_coding	TMEM143	0.546833	2.15553e-05	0.000189327	0	-0.0312335	0.760562	0.880448	0	14.9452	9.096	10.1789	16.5619	10.3463	10.2614	13.9765	11.0984	10.782	4.24219	2.58189	2.88927	4.70108	2.93679	2.91268	3.96723	3.15026	3.06046
ENSG00000198700.10_3	protein_coding	IPO9	0.00600995	0.901553	0.934582	0	-0.0483713	0.325997	0.550681	0	242.41	243.343	245.871	248.608	239.969	246.41	255.967	236.009	251.564	20.3637	20.4421	20.6545	20.8844	20.1587	20.6997	21.5026	19.8261	21.1327
ENSG00000198892.6_2	protein_coding	SHISA4	-0.0366515	0.701649	0.787976	0	0.23472	0.019888	0.0881734	0	12.2424	14.4436	11.8075	11.0861	13.2714	12.04	12.3017	15.1517	12.6204	7.01167	8.27242	6.76261	6.34945	7.60106	6.89577	7.04563	8.67795	7.22819
ENSG00000243302.3_5	processed_pseudogene	AC018638.4	0.426782	0.00931573	0.0285425	0	-0.0473228	0.760498	0.880445	0	7.04865	4.39807	5.4966	7.31596	5.30858	4.05894	6.58399	5.40443	6.11146	6.12926	3.8244	4.77966	6.3617	4.61615	3.52952	5.72521	4.6995	5.31431
ENSG00000058729.11_5	protein_coding	RIOK2	-0.277484	0.000288614	0.00165474	0	-0.183016	0.0082579	0.0463695	0	41.1789	43.6808	49.9275	39.183	45.7729	51.8085	42.6227	41.7878	47.1527	7.50208	7.95788	9.09592	7.13846	8.33903	9.43861	7.7651	7.61301	8.59039
ENSG00000234678.2_6	lncRNA	ELF3-AS1	0.101671	0.533895	0.653268	0	-0.0488032	0.767136	0.884441	0	5.67071	3.89829	5.14034	5.70016	5.52525	4.28697	4.50483	4.97014	5.46554	1.01826	0.699997	0.923028	1.02355	0.992145	0.769792	0.808913	0.892466	0.981421
ENSG00000183688.4_3	protein_coding	RFLNB	-0.407727	1.12251e-05	0.000108791	0	0.196601	0.00825425	0.0463671	0	34.4483	56.5751	45.8559	32.3159	52.7608	46.9287	37.5403	48.9776	45.3143	9.51347	15.6242	12.6639	8.92458	14.5708	12.9601	10.3674	13.526	12.5143
ENSG00000143862.8_3	protein_coding	ARL8A	-0.0183731	0.796996	0.859258	0	-0.00878501	0.901855	0.953107	0	31.2684	31.2363	30.3331	31.7773	31.7973	35.0711	30.7253	31.4132	29.5139	15.8321	15.8158	15.3585	16.0898	16.0999	17.7575	15.5571	15.9054	14.9437
ENSG00000074219.13_4	protein_coding	TEAD2	-1.00274	1.49846e-10	7.13436e-09	-1	-0.0227848	0.76019	0.880159	0	14.8923	29.2371	26.6687	14.587	28.9805	31.5138	14.9006	29.2901	30.6567	4.9974	9.81112	8.94923	4.89498	9.725	10.5751	5.0002	9.82888	10.2875
ENSG00000077157.22_7	protein_coding	PPP1R12B	0.0460651	0.64571	0.746049	0	-0.013606	0.891945	0.948508	0	18.2311	15.7431	18.5765	18.7163	18.8509	15.8253	19.2322	19.3015	20.0734	0.865304	0.747215	0.881697	0.888333	0.894721	0.751119	0.912819	0.91611	0.952747
ENSG00000143412.10_3	protein_coding	ANXA9	-0.593652	0.00552197	0.0186972	-1	-0.0551974	0.759542	0.879691	0	1.64292	2.89872	3.15546	2.06463	2.38344	2.50834	2.0214	3.03999	3.03089	1.03069	1.81852	1.97958	1.29525	1.49526	1.57361	1.26813	1.90715	1.90144
ENSG00000214796.8_5	transcribed_unprocessed_pseudogene	AC098934.1	0.00781873	0.967694	0.977995	0	0.380167	0.0524561	0.171849	0	2.59687	3.54844	3.35904	3.09694	4.44187	2.73637	3.00322	3.32951	2.58371	0.877914	1.19961	1.13558	1.04697	1.50165	0.925073	1.01529	1.1256	0.873464
ENSG00000234996.4_5	transcribed_processed_pseudogene	AC098934.2	-0.332764	0.373895	0.506113	0	0.374661	0.273814	0.49405	0	0.900955	1.54932	0.814312	0.673248	0.541692	1.04894	0.577543	1.39936	0.844674	0.388175	0.667522	0.350845	0.290068	0.233387	0.451935	0.248834	0.602913	0.363927
ENSG00000183155.4_2	protein_coding	RABIF	0.0286941	0.753674	0.827143	0	0.0663245	0.468695	0.679226	0	13.0373	14.9434	13.0799	12.8815	12.1881	13.4994	13.5145	13.2698	12.0242	5.36516	6.14956	5.38267	5.30102	5.01566	5.55531	5.56152	5.46082	4.94822
ENSG00000117153.16_4	protein_coding	KLHL12	-0.0581118	0.415856	0.545952	0	0.0986785	0.17159	0.370802	0	60.7349	68.12	57.9179	56.6875	65.1113	65.5816	59.2559	63.6468	60.2699	17.3133	19.4185	16.5102	16.1595	18.5608	18.6949	16.8916	18.1433	17.1807
ENSG00000118242.16_5	protein_coding	MREG	-0.404144	9.22996e-05	0.000638531	0	-0.0245699	0.759306	0.879496	0	18.1251	25.089	23.1061	17.8635	21.451	25.585	18.3659	24.0787	23.154	4.98216	6.89636	6.35132	4.91025	5.89637	7.03272	5.04834	6.61865	6.36448
ENSG00000159348.13_5	protein_coding	CYB5R1	0.0152436	0.885737	0.922893	0	-0.205953	0.0676111	0.203567	0	20.563	15.4932	18.2202	19.6588	18.6884	21.9821	19.0589	16.7441	18.3841	4.57463	3.44676	4.05344	4.37349	4.15759	4.89035	4.24003	3.72505	4.08989
ENSG00000163444.12_3	protein_coding	TMEM183A	0.0601886	0.299653	0.431739	0	-0.0125177	0.82702	0.914689	0	63.2258	63.572	59.6483	64.946	58.0152	64.6238	66.0131	62.9712	61.9096	15.6577	15.7434	14.7717	16.0837	14.3673	16.0039	16.348	15.5947	15.3318
ENSG00000143847.15_3	protein_coding	PPFIA4	0.401281	0.042289	0.0955492	0	-0.585355	0.00925969	0.0504999	0	6.83666	2.19903	4.07156	6.4183	3.57516	3.87652	4.6781	3.32951	5.71397	0.704302	0.226541	0.419446	0.661203	0.368308	0.399353	0.48193	0.343001	0.588644
ENSG00000126777.18_6	protein_coding	KTN1	0.240099	0.000226798	0.00134799	0	0.0163843	0.758978	0.879263	0	257.779	224.351	224.597	266.337	229.244	223.014	273.813	229.688	227.963	14.6649	12.7632	12.7772	15.1517	13.0415	12.6871	15.577	13.0668	12.9686
ENSG00000162004.17_5	protein_coding	CCDC78	0.807643	1.9294e-05	0.000172617	1	-0.047243	0.757254	0.878062	0	18.7081	8.44628	9.05922	17.684	10.6172	9.30365	17.7306	10.8571	12.5707	4.51123	2.03672	2.18452	4.26428	2.5602	2.24346	4.27552	2.61806	3.03128
ENSG00000197355.11_3	protein_coding	UAP1L1	0.460681	5.32447e-06	5.75131e-05	0	0.21817	0.00823027	0.0462504	0	32.1694	24.7891	22.9025	31.4631	27.1387	22.7118	30.783	27.8907	23.0049	6.10772	4.70649	4.3483	5.97363	5.1526	4.3121	5.84451	5.29537	4.36775
ENSG00000120549.18_6	protein_coding	KIAA1217	0.579183	6.37789e-05	0.000470068	0	0.0364786	0.757031	0.877981	0	22.0999	17.0425	16.0318	24.8653	15.3299	13.8186	25.5851	17.3714	18.7816	2.04496	1.57699	1.48346	2.30085	1.41851	1.27868	2.36746	1.60742	1.73791
ENSG00000058673.16_5	protein_coding	ZC3H11A	-0.417814	0.135819	0.238153	0	-0.240981	0.368763	0.590598	0	1.11294	1.04954	1.47594	1.25673	1.30006	1.4594	0.866314	1.35111	1.44091	0.0869623	0.082008	0.115326	0.0981973	0.101583	0.114033	0.0676914	0.105572	0.112589
ENSG00000257315.2_4	protein_coding	ZBED6	-0.0441021	0.90614	0.937316	0	0.165316	0.650659	0.810781	0	1.21894	1.79921	2.23936	1.61579	1.73341	0.638485	1.67487	1.68888	1.83841	0.0976635	0.144156	0.179421	0.12946	0.138884	0.0511566	0.134194	0.135316	0.147296
ENSG00000182004.13_3	protein_coding	SNRPE	-0.0477685	0.476667	0.601765	0	0.0522256	0.435704	0.650935	0	86.1737	91.9096	89.5234	89.6766	103.896	97.6427	90.3277	89.6074	87.8957	41.4296	44.1873	43.0401	43.1138	49.9502	46.9436	43.4268	43.0805	42.2576
ENSG00000204438.11_4	protein_coding	GPANK1	-0.0936482	0.215439	0.338697	0	-0.217433	0.00821649	0.046191	0	26.6047	23.4897	28.6536	24.192	24.5928	27.7741	28.7616	24.7542	28.2717	8.20372	7.24319	8.83552	7.45977	7.58335	8.56433	8.86884	7.63312	8.71777
ENSG00000143845.15_5	protein_coding	ETNK2	-0.00617392	0.94886	0.96586	0	-0.00427239	0.964518	0.984833	0	17.7541	17.7922	16.5916	16.0682	16.0882	19.6562	18.2504	18.0952	15.8501	3.93399	3.94243	3.6764	3.56042	3.56487	4.35547	4.04395	4.00957	3.51209
ENSG00000174567.8_3	protein_coding	GOLT1A	0.188283	0.197368	0.316679	0	0.0113708	0.937371	0.970166	0	4.45178	3.99824	4.07156	4.71273	3.62933	4.28697	4.90911	4.77713	3.97493	4.32631	3.88556	3.95681	4.57992	3.52705	4.16616	4.77076	4.6425	3.86291
ENSG00000198478.8_3	protein_coding	SH3BGRL2	-0.561278	0.000372552	0.00204967	0	-0.0386978	0.756665	0.877909	0	7.26063	10.1955	10.6878	5.70016	9.20876	9.75971	6.41073	8.34791	8.04924	1.57737	2.21497	2.32193	1.23836	2.0006	2.12029	1.39273	1.81358	1.74869
ENSG00000219133.2_5	processed_pseudogene	AL592114.1	0.119908	0.676487	0.76857	0	-0.0160346	0.955928	0.980106	0	1.48393	1.29943	2.03578	1.79533	2.76263	1.505	2.48343	1.20635	1.73903	3.07231	2.69033	4.21486	3.71703	5.71972	3.11595	5.14169	2.49761	3.60048
ENSG00000158615.9_3	protein_coding	PPP1R15B	-0.0356529	0.554718	0.671178	0	0.0105626	0.86032	0.932989	0	166.359	177.922	173.957	174.326	181.033	182.561	175.862	174.438	172.91	31.6331	33.8319	33.078	33.1482	34.4235	34.7141	33.4402	33.1693	32.8788
ENSG00000101246.20_3	protein_coding	ARFRP1	0.250582	0.00752909	0.0239112	0	0.0266385	0.755012	0.876978	0	54.7992	43.4809	46.2631	60.0537	48.9689	45.2869	53.365	51.7281	50.0345	7.18584	5.70166	6.06649	7.87486	6.42131	5.93848	6.99776	6.78312	6.56104
ENSG00000149532.15_6	protein_coding	CPSF7	0.366512	4.24784e-06	4.71906e-05	0	0.0181606	0.753904	0.876167	0	259.899	188.217	196.402	270.601	208.551	194.601	241.586	209.856	208.038	43.0581	31.1824	32.5384	44.8311	34.5512	32.2401	40.0242	34.7674	34.4662
ENSG00000170382.12_3	protein_coding	LRRN2	-0.200827	0.106343	0.196773	0	-0.0702316	0.554203	0.745291	0	5.08774	5.99736	5.75108	4.93715	5.0919	6.06561	5.25564	5.59744	5.71397	0.894784	1.05476	1.01144	0.868299	0.895515	1.06676	0.924312	0.984426	1.00492
ENSG00000240219.1_6	lncRNA	AL512306.2	0.947365	0.0255533	0.0637883	0	0.0937878	0.831519	0.917521	0	1.37793	0.399824	0.916101	1.30161	0.920876	0.410455	0.981823	0.723807	0.59624	0.620969	0.180182	0.412844	0.586576	0.414996	0.184973	0.442462	0.326186	0.268698
ENSG00000163531.15_7	protein_coding	NFASC	-0.0496071	0.908546	0.938887	0	-0.959334	0.0613847	0.190832	0	0.847957	0.299868	0.916101	1.21185	0.704199	0.456061	0.462034	0.386031	1.34154	0.0398645	0.0140975	0.0430681	0.0569717	0.0331061	0.0214405	0.0217213	0.0181482	0.063069
ENSG00000174529.7_2	protein_coding	TMEM81	0.220017	0.220508	0.344613	0	0.335834	0.0652001	0.198666	0	3.49782	3.69837	3.61351	4.12925	3.90018	3.42046	3.29199	4.29459	2.38496	2.62599	2.77656	2.71284	3.10004	2.92806	2.56791	2.47147	3.22417	1.79051
ENSG00000117222.14_4	protein_coding	RBBP5	0.0633146	0.362922	0.495584	0	-0.102685	0.148786	0.33911	0	80.185	71.9184	74.8658	81.0141	73.6159	81.4069	85.6496	74.4074	79.8465	18.2073	16.3302	16.9995	18.3956	16.7157	18.4848	19.4481	16.8954	18.1304
ENSG00000133059.17_3	protein_coding	DSTYK	0.0243372	0.776444	0.844249	0	0.233464	0.0116288	0.0602569	0	23.6898	27.9877	23.0552	24.4613	29.6305	23.6696	24.9498	26.9256	25.1415	2.79526	3.30238	2.72038	2.88629	3.49623	2.79287	2.94394	3.17707	2.96654
ENSG00000188095.6_4	protein_coding	MESP2	2.68293	1.71171e-06	2.13927e-05	1	0.191658	0.754025	0.876167	0	1.11294	0.199912	0.101789	1.16696	0.216677	0.182424	0.924068	0.144761	0.198747	0.615226	0.11051	0.0562681	0.645087	0.119777	0.100843	0.510817	0.0800229	0.109866
ENSG00000126458.4_3	protein_coding	RRAS	-0.311977	0.00162907	0.006941	0	0.0262489	0.753592	0.876104	0	17.0651	22.0903	19.6962	15.0807	19.7717	21.2524	16.1134	19.0603	18.8313	15.4856	20.0456	17.8731	13.6849	17.9417	19.2853	14.622	17.2961	17.0883
ENSG00000186007.10_5	protein_coding	LEMD1	0.280143	0.446284	0.574824	0	0.087163	0.814987	0.910151	0	1.27194	0.949582	0.712523	0.493715	0.758368	0.82091	1.27059	0.868569	0.89436	1.22184	0.912183	0.68446	0.47427	0.7285	0.788578	1.22055	0.83436	0.859136
ENSG00000261221.3_2	protein_coding	ZNF865	0.224693	0.010701	0.0319129	0	0.0257047	0.75143	0.875001	0	24.6438	21.7904	20.5105	24.0125	19.5009	22.4382	24.2568	22.1485	19.3778	6.15325	5.4408	5.12122	5.99563	4.86914	5.60255	6.05663	5.53021	4.8384
ENSG00000143222.12_3	protein_coding	UFC1	-0.256214	0.00159239	0.00681486	0	0.0220166	0.751153	0.875001	0	46.2667	58.0745	57.3581	47.6659	59.6402	62.3435	49.2066	55.8779	51.1276	22.0317	27.6545	27.3134	22.6981	28.4001	29.6874	23.4317	26.6085	24.3465
ENSG00000117266.15_5	protein_coding	CDK18	0.218284	0.0280941	0.0688872	0	0.0693316	0.461454	0.67299	0	30.2085	25.3888	26.8723	31.9568	28.2221	25.0834	31.1296	30.5447	28.3214	4.42226	3.71671	3.93387	4.67821	4.13148	3.67199	4.5571	4.47148	4.14601
ENSG00000174514.13_4	protein_coding	MFSD4A	-0.251813	0.424364	0.553923	0	0.276901	0.349052	0.572667	0	0.79496	1.44936	0.966995	1.30161	1.02921	0.957728	0.519789	1.39936	1.29185	0.137299	0.250322	0.167011	0.224804	0.177757	0.165411	0.0897735	0.241686	0.223118
ENSG00000158711.13_2	protein_coding	ELK4	0.177095	0.0738994	0.148241	0	0.213861	0.0339515	0.127759	0	108.274	110.252	105.402	120.152	121.393	93.3557	115.624	121.407	105.733	8.91727	9.08018	8.68082	9.89559	9.99778	7.68866	9.52265	9.9989	8.70806
ENSG00000105852.11_3	protein_coding	PON3	-1.47818	0.000209559	0.00126746	-1	-0.0856001	0.751515	0.875001	0	0.423979	1.39938	0.916101	0.538598	1.13755	1.36818	0.462034	1.2546	1.73903	0.102932	0.339739	0.222408	0.130759	0.276172	0.332164	0.112171	0.304588	0.422198
ENSG00000069275.13_3	protein_coding	NUCKS1	0.072229	0.371036	0.503377	0	-0.1111	0.175498	0.375647	0	399.6	367.888	391.684	420.6	378.534	408.311	436.334	360.167	395.109	61.9631	57.0458	60.7356	65.2195	58.6966	63.3139	67.6591	55.8484	61.2666
ENSG00000109265.14_7	protein_coding	KIAA1211	-0.62281	0.000100541	0.000686888	-1	-0.0388594	0.751585	0.875001	0	18.2841	26.8382	26.7705	15.2603	24.1594	26.2235	18.5391	26.7326	26.9302	2.71076	3.97898	3.96894	2.26246	3.58183	3.88784	2.74857	3.96332	3.99261
ENSG00000133065.11_3	protein_coding	SLC41A1	-0.0513578	0.352622	0.485794	0	0.0616919	0.264865	0.483524	0	81.0329	90.6101	84.2812	80.8795	86.6707	85.9675	84.5523	89.1731	85.0636	12.7051	14.2067	13.2144	12.681	13.589	13.4788	13.2569	13.9814	13.337
ENSG00000120705.13_4	protein_coding	ETF1	-0.222303	0.000207032	0.00125533	0	-0.142672	0.00821625	0.046191	0	326.57	351.695	385.475	334.066	356.704	408.996	340.693	349.744	373.594	71.9792	77.5171	84.9625	73.6314	78.6211	90.1467	75.092	77.087	82.3439
ENSG00000229874.2	antisense	RP11-312O7.2	0.135602	0.71621	0.799064	0	0.175541	0.635744	0.800421	0	0.635968	1.24945	0.966995	0.85278	1.02921	0.638485	1.09733	0.386031	0.7453	0.710579	1.39603	1.08044	0.952827	1.14996	0.713392	1.22607	0.431319	0.832738
ENSG00000196550.10_2	protein_coding	FAM72A	-0.121832	0.296834	0.428634	0	-0.218925	0.0709303	0.210616	0	8.69156	8.09644	9.41548	7.76479	8.72123	9.21243	8.43213	6.46601	8.39705	2.29753	2.14022	2.48889	2.05255	2.30538	2.43522	2.22895	1.70923	2.21968
ENSG00000260917.1_6	lncRNA	AL158212.3	0.440911	1.48196e-05	0.000138302	0	-0.0250854	0.750771	0.875001	0	24.0078	17.1425	18.0675	23.1597	16.6299	15.8709	24.0258	17.7092	18.5331	5.66622	4.0459	4.26423	5.46607	3.92493	3.74579	5.67047	4.17964	4.37412
ENSG00000263528.8_3	protein_coding	IKBKE	0.113949	0.424376	0.553923	0	0.335844	0.0241478	0.101301	0	7.10164	7.59666	6.31091	7.63014	7.58368	6.65849	5.31339	8.34791	5.66428	1.87329	2.00387	1.66471	2.0127	2.00044	1.75639	1.40158	2.20203	1.49414
ENSG00000151224.13_4	protein_coding	MAT1A	-2.08642	3.56674e-08	8.01739e-07	-1	0.0578418	0.75139	0.875001	0	0.953952	3.94826	3.30814	0.763014	3.46683	4.515	0.80856	3.7638	2.88183	0.260358	1.07758	0.902877	0.208246	0.946186	1.23226	0.220677	1.02724	0.786525
ENSG00000143486.16_6	protein_coding	EIF2D	-0.0330994	0.56872	0.6821	0	0.1208	0.0469775	0.159701	0	69.0555	76.3164	70.438	70.5564	81.6871	75.8886	72.8859	78.4125	71.0023	8.56662	9.46737	8.73812	8.75281	10.1336	9.41429	9.04179	9.72739	8.80812
ENSG00000143479.17_5	protein_coding	DYRK3	0.159119	0.0319486	0.0763454	0	0.161273	0.0297487	0.117296	0	24.5908	24.7391	20.8667	24.6858	24.4845	22.0734	22.7552	23.0171	21.6137	2.38421	2.3986	2.02315	2.39342	2.37391	2.14014	2.20624	2.23163	2.09557
ENSG00000162889.10_4	protein_coding	MAPKAPK2	-0.0730084	0.218864	0.342637	0	-0.00452782	0.93774	0.970268	0	75.3092	79.0652	78.123	73.0249	81.1996	83.5504	76.6399	75.6137	74.8281	17.9521	18.8475	18.6229	17.4076	19.3563	19.9167	18.2694	18.0247	17.8375
ENSG00000233922.3_5	lncRNA	LINC01694	0.788859	0.0110021	0.0326287	1	-0.100862	0.749811	0.874174	0	1.21894	0.649714	0.814312	1.21185	0.812537	0.729698	1.55937	0.675554	0.7453	0.171175	0.0912392	0.114354	0.170179	0.114104	0.102471	0.218981	0.0948678	0.104662
ENSG00000142731.11_3	protein_coding	PLK4	0.185347	0.0135658	0.038484	0	-0.0221145	0.749583	0.874049	0	70.3805	62.4225	63.2618	79.6677	70.7449	70.0966	80.7982	66.8316	69.611	15.7134	13.9367	14.1241	17.7869	15.7948	15.6501	18.0393	14.9211	15.5416
ENSG00000180667.10_2	protein_coding	YOD1	0.167356	0.118267	0.21398	0	-0.00493895	0.962229	0.983701	0	35.9852	30.1367	35.677	46.4092	40.7352	36.4849	39.3307	37.4932	36.47	5.51835	4.62149	5.4711	7.11689	6.24677	5.59498	6.03139	5.74961	5.5927
ENSG00000224462.2_4	unprocessed_pseudogene	C4BPAP1	0.0976216	0.742569	0.819581	0	0.327769	0.265045	0.483747	0	1.85491	1.14949	1.8831	1.79533	2.92513	1.09455	1.44386	1.97841	1.83841	0.979877	0.607234	0.994768	0.948403	1.54524	0.578207	0.762735	1.04512	0.971161
ENSG00000196352.15_6	protein_coding	CD55	0.0309902	0.658333	0.754951	0	-0.0403135	0.566593	0.753734	0	42.4509	40.6821	39.4941	42.4146	40.9519	47.2479	43.8355	40.8227	39.0537	7.18532	6.88594	6.68485	7.17918	6.9316	7.99728	7.41969	6.90974	6.61031
ENSG00000146425.11_4	protein_coding	DYNLT1	-0.358001	2.73928e-05	0.00023267	0	-0.0206762	0.749537	0.874049	0	57.3431	72.9179	72.2702	58.393	72.8033	78.4425	58.6206	74.5522	72.6916	19.4186	24.6928	24.4735	19.7741	24.654	26.5637	19.8512	25.2462	24.6162
ENSG00000117335.19_4	protein_coding	CD46	-0.039594	0.4777	0.602595	0	0.101059	0.0797201	0.227074	0	138.535	145.786	138.637	141.786	160.016	145.392	135.434	152.675	143.346	15.9089	16.7416	15.9206	16.2823	18.3757	16.6964	15.5528	17.5327	16.4614
ENSG00000181027.10_5	protein_coding	FKRP	0.139903	0.043559	0.0977606	0	0.190323	0.00821202	0.046191	0	27.3996	27.9377	24.2258	25.4039	27.3554	24.3993	27.1445	27.4082	23.8496	5.39256	5.49847	4.76791	4.99978	5.38387	4.80206	5.34236	5.39425	4.69388
ENSG00000153561.13_3	protein_coding	RMND5A	0.228324	0.00119761	0.00538065	0	0.0194958	0.74846	0.873305	0	101.278	91.5597	88.4037	112.702	95.8252	96.0465	113.429	95.9286	95.0009	15.1478	13.6942	13.2222	16.8564	14.3322	14.3653	16.9652	14.3477	14.2089
ENSG00000196878.15_4	protein_coding	LAMB3	0.0366533	0.558893	0.673969	0	-0.143345	0.0323405	0.123639	0	65.5047	61.1231	62.9056	62.0286	54.3317	62.5716	62.7789	52.5002	60.0215	14.0961	13.1532	13.5368	13.3481	11.6918	13.4649	13.5096	11.2976	12.9162
ENSG00000162757.4_3	protein_coding	C1orf74	-0.0155613	0.893787	0.928806	0	-0.234114	0.0598756	0.187799	0	12.7194	9.34589	9.97532	10.5475	11.1588	13.3626	12.7059	10.3263	12.8192	2.71549	1.99528	2.12966	2.25182	2.38233	2.85282	2.71263	2.20459	2.7368
ENSG00000184675.11_5	protein_coding	AMER1	0.326488	0.00801297	0.0252093	0	0.0364639	0.748053	0.873105	0	15.6342	13.2942	12.9272	18.2675	15.7091	14.2747	20.676	15.586	16.2475	1.85967	1.58132	1.53767	2.17289	1.86857	1.69796	2.45938	1.85393	1.93262
ENSG00000117597.18_5	protein_coding	UTP25	-0.0699347	0.208092	0.329997	0	-0.0554768	0.313511	0.537612	0	69.4795	71.7185	74.8149	73.0698	69.0657	73.289	66.9372	70.9331	71.9463	6.67366	6.88872	7.18614	7.01852	6.63391	7.03957	6.42947	6.81329	6.91061
ENSG00000109920.12_3	protein_coding	FNBP4	0.238204	0.0146479	0.0409024	0	-0.0290658	0.747409	0.872713	0	102.391	77.266	86.8769	115.305	93.4418	82.547	101.243	94.5292	101.261	13.4796	10.1719	11.4372	15.1797	12.3014	10.8672	13.3285	12.4446	13.3309
ENSG00000101040.19_5	protein_coding	ZMYND8	-0.30397	0.000116841	0.0007746	0	0.0201218	0.74733	0.872691	0	46.4787	56.5251	59.2412	45.5564	55.3067	51.7629	42.2761	56.4087	55.0032	6.09556	7.41313	7.76933	5.97461	7.25334	6.78858	5.54441	7.39787	7.21353
ENSG00000117625.13_5	protein_coding	RCOR3	0.137461	0.076551	0.152268	0	-0.130209	0.096241	0.256767	0	31.7984	26.2385	26.4651	31.4631	26.2179	29.1879	30.09	25.1402	29.2158	3.4974	2.88588	2.91081	3.46053	2.88362	3.21028	3.3095	2.7651	3.21335
ENSG00000123094.15_5	protein_coding	RASSF8	0.93029	9.81738e-09	2.74563e-07	1	-0.0323847	0.74718	0.872587	0	46.9026	25.039	24.582	52.4684	25.1345	28.0021	50.997	26.9739	26.2843	6.15601	3.28639	3.22641	6.88653	3.29892	3.6753	6.6934	3.54035	3.44983
ENSG00000179818.14_4	lncRNA	PCBP1-AS1	0.519033	0.000147236	0.000937687	0	0.0368002	0.747053	0.872509	0	19.344	12.6444	12.8763	18.9407	12.2964	12.9977	18.1348	15.393	13.5148	0.632054	0.413149	0.420725	0.618876	0.401777	0.424693	0.592545	0.502956	0.441587
ENSG00000152684.11_4	protein_coding	PELO	0.179631	0.00701771	0.0226172	0	-0.0195386	0.746785	0.872338	0	52.2024	44.2805	47.5354	55.9244	48.8606	48.981	52.6719	47.0475	45.513	11.9429	10.1305	10.8752	12.7944	11.1784	11.2059	12.0503	10.7636	10.4125
ENSG00000117650.13_3	protein_coding	NEK2	0.0708378	0.262871	0.392011	0	0.0717181	0.25675	0.474169	0	66.6176	71.2687	64.0761	68.0429	67.6031	69.6405	69.8827	65.77	60.9159	21.5243	23.027	20.7031	21.9848	21.8427	22.501	22.5792	21.2504	19.682
ENSG00000123684.13_3	protein_coding	LPGAT1	-0.171887	0.0263105	0.0652159	0	0.200014	0.0108205	0.0570932	0	98.628	128.294	109.423	99.1021	128.814	113.65	100.492	128.789	112.838	11.2205	14.5954	12.4486	11.2744	14.6546	12.9295	11.4326	14.6518	12.8371
ENSG00000143493.13_4	protein_coding	INTS7	-0.0345822	0.59971	0.707638	0	-0.0250367	0.703073	0.845742	0	62.8548	65.2713	61.4296	59.4702	58.5027	64.6695	60.2377	59.9313	60.8165	11.8015	12.2552	11.5339	11.166	10.9844	12.1422	11.3101	11.2526	11.4188
ENSG00000143476.18_3	protein_coding	DTL	-0.129077	0.0399686	0.0914663	0	-0.0600891	0.315456	0.539764	0	84.4777	84.2629	87.3349	81.7772	92.4668	97.0954	87.44	89.3178	92.8147	17.1598	17.1162	17.7402	16.6112	18.7826	19.7228	17.7615	18.143	18.8533
ENSG00000248334.6_2	transcribed_unprocessed_pseudogene	WHAMMP2	-1.73822	0.000797873	0.00384059	-1	-0.112994	0.746668	0.872338	0	0.476976	1.09952	1.17057	0.314182	0.758368	0.729698	0.115509	1.01333	1.24217	0.0716503	0.165167	0.175841	0.0471958	0.11392	0.109614	0.0173514	0.15222	0.186596
ENSG00000037042.9_3	protein_coding	TUBG2	0.305192	0.0157519	0.0433394	0	0.0384909	0.745169	0.870873	0	20.086	14.3437	13.6397	20.736	16.7383	14.6396	16.5177	16.7441	18.2847	7.19155	5.13559	4.88354	7.42429	5.99294	5.24152	5.91397	5.99502	6.54662
ENSG00000117691.10_3	protein_coding	NENF	-0.0933562	0.236773	0.362918	0	0.111363	0.156808	0.35013	0	32.0634	37.3836	35.3717	33.9317	37.1059	36.9866	32.6889	39.2786	32.9423	25.3666	29.5756	27.9839	26.8447	29.3559	29.2615	25.8615	31.0749	26.0619
ENSG00000180011.7_4	protein_coding	ZADH2	-0.175752	0.0142477	0.0400486	0	-0.0212247	0.744964	0.870873	0	29.8375	34.9846	36.0333	30.1166	34.6141	32.7908	31.1873	31.8475	34.1348	3.75645	4.40446	4.53648	3.79159	4.35781	4.12826	3.92639	4.00951	4.29746
ENSG00000123685.9_3	protein_coding	BATF3	-0.316696	0.128344	0.228489	0	0.202437	0.29376	0.516605	0	1.69591	2.14905	1.93399	1.52603	2.38344	1.96106	1.32835	2.02666	1.78872	0.660146	0.836534	0.752818	0.594016	0.927771	0.763356	0.517068	0.788891	0.696271
ENSG00000237862.2_7	lncRNA	Z94160.1	1.80509	0.00142267	0.00620071	1	-0.212367	0.744557	0.870873	0	1.11294	0.149934	0.152683	0.807897	0.379184	0.273637	1.03958	0.193015	0.397493	0.523	0.0704577	0.0717497	0.379651	0.178188	0.128589	0.488523	0.0907027	0.186792
ENSG00000224934.5_6	lncRNA	AL391684.1	0.788789	0.00129717	0.005751	1	0.0739232	0.744963	0.870873	0	2.38488	1.34941	1.32326	2.91741	1.46257	1.68743	2.6567	2.02666	1.58997	0.279424	0.158103	0.155039	0.341817	0.171361	0.197707	0.311271	0.237453	0.186289
ENSG00000198468.9_6	lncRNA	FLVCR1-DT	-0.0548273	0.704321	0.789994	0	0.17384	0.226752	0.441124	0	4.82276	6.04734	5.24213	5.0718	7.04199	6.20243	6.29522	5.83871	5.26679	1.12945	1.41624	1.22767	1.18778	1.64918	1.45256	1.47429	1.36738	1.23344
ENSG00000139826.6_3	protein_coding	ABHD13	0.333988	0.000940589	0.00439134	0	0.0285182	0.745103	0.870873	0	22.5239	17.2924	17.864	24.6858	21.6135	20.1579	24.4301	19.1568	18.7816	4.23939	3.25473	3.36231	4.64629	4.06804	3.79407	4.59817	3.60564	3.53502
ENSG00000143494.15_5	protein_coding	VASH2	0.288525	0.176471	0.291046	0	0.0785233	0.711223	0.85067	0	3.17984	2.89872	2.69741	2.10951	2.54595	2.41712	3.81178	2.31618	2.2359	0.349971	0.319032	0.296875	0.232171	0.280206	0.266027	0.419523	0.254918	0.246082
ENSG00000106031.9_5	protein_coding	HOXA13	-0.654055	8.86564e-05	0.000617471	-1	0.0404509	0.745012	0.870873	0	4.92875	7.79657	6.71807	4.39855	8.45039	7.79864	5.77543	8.05839	9.09266	0.971949	1.53748	1.3248	0.867393	1.66641	1.53789	1.13891	1.58911	1.79307
ENSG00000136643.12_4	protein_coding	RPS6KC1	-0.0119162	0.860216	0.90519	0	-0.116574	0.0987241	0.260862	0	28.7246	27.7878	29.5188	31.1938	29.6305	31.605	31.8804	27.9872	31.402	4.63973	4.48841	4.76802	5.03857	4.78607	5.105	5.14947	4.52063	5.0722
ENSG00000143499.14_3	protein_coding	SMYD2	0.0201713	0.761525	0.833386	0	0.0282461	0.670624	0.824693	0	27.8236	27.0881	27.5848	28.4559	28.2763	28.3214	28.6461	30.0139	27.8245	5.69106	5.54062	5.64222	5.8204	5.78366	5.79288	5.8593	6.13906	5.69125
ENSG00000231196.3	lincRNA	RP11-495P10.8	2.45379	3.32068e-05	0.00027399	1	-0.216585	0.743658	0.870375	0	1.32493	0	0.305367	1.61579	0.270846	0.228031	1.67487	0.434284	0.29812	2.01664	0	0.46479	2.45935	0.412246	0.347078	2.54928	0.661011	0.45376
ENSG00000117724.13_3	protein_coding	CENPF	0.250089	0.0226045	0.0578686	0	0.0158269	0.8766	0.941797	0	430.285	398.375	413.823	512.342	412.281	340.267	509.046	423.476	466.757	36.8616	34.1279	35.4513	43.8912	35.3192	29.1499	43.6089	36.2782	39.986
ENSG00000114956.20_3	protein_coding	DGUOK	-0.358284	0.000106056	0.000715855	0	-0.0238185	0.743546	0.870323	0	39.96	52.377	51.1489	38.1507	48.6439	50.486	39.0419	46.6615	48.4942	27.4639	35.9979	35.1539	26.2204	33.4322	34.6983	26.8329	32.0697	33.3293
ENSG00000092978.11_3	protein_coding	GPATCH2	-0.0434588	0.576191	0.687532	0	-0.175408	0.0347644	0.129936	0	18.3371	18.4919	21.0703	21.7683	19.2842	20.9788	21.0226	18.0952	21.0175	2.0741	2.0916	2.38325	2.4622	2.18123	2.3729	2.37785	2.04674	2.37727
ENSG00000162814.11_3	protein_coding	SPATA17	-0.0147218	0.961549	0.974446	0	0.515825	0.0821705	0.231557	0	0.635968	1.09952	0.966995	0.807897	1.08338	0.866516	0.866314	1.15809	0.496867	0.097616	0.168767	0.148426	0.124006	0.166291	0.133003	0.132972	0.177758	0.0762651
ENSG00000122574.10_2	protein_coding	WIPF3	0.402877	0.000331783	0.00185652	0	-0.0314571	0.742334	0.869742	0	23.4248	15.6431	15.0139	19.3895	15.4382	15.3237	18.2504	14.1384	15.8501	3.8623	2.57924	2.47549	3.19696	2.54546	2.52657	3.00913	2.33114	2.61336
ENSG00000145555.15_5	protein_coding	MYO10	-0.956822	4.87365e-11	2.68442e-09	-1	0.0226419	0.74233	0.869742	0	49.6585	113.5	111.204	57.1363	109.963	101.702	60.3532	106.062	111.547	3.5516	8.11758	7.9534	4.08642	7.86464	7.27375	4.31649	7.5856	7.97787
ENSG00000087152.15_2	protein_coding	ATXN7L3	0.255384	7.78276e-05	0.000553539	0	0.0169771	0.741524	0.869305	0	140.284	118.548	114.665	139.542	115.489	120.355	137.744	119.911	114.776	26.4637	22.3633	21.6309	26.3237	21.7862	22.7041	25.9845	22.6204	21.6518
ENSG00000215817.7_6	protein_coding	ZC3H11B	-0.87547	0.0498241	0.108711	0	-0.42331	0.29458	0.517416	0	0.79496	0.99956	1.93399	0.85278	1.08338	1.00333	0.462034	0.868569	1.04342	0.160113	0.201321	0.389525	0.171758	0.218204	0.202081	0.0930583	0.174938	0.210155
ENSG00000127511.9_3	protein_coding	SIN3B	0.237066	0.00191831	0.00789369	0	-0.0220932	0.741327	0.869198	0	96.4551	74.2174	82.0928	91.8759	73.345	71.2823	86.2849	81.8867	79.7968	10.9895	8.45589	9.35317	10.4678	8.3565	8.12149	9.8308	9.3297	9.09158
ENSG00000205413.8_4	protein_coding	SAMD9	-0.641047	3.70062e-05	0.000301205	-1	-0.0379942	0.7408	0.869031	0	9.48652	15.3932	15.4719	10.0987	15.1132	15.9621	11.0311	15.9238	16.2475	1.38388	2.24555	2.25703	1.47319	2.2047	2.32854	1.6092	2.32294	2.37017
ENSG00000067704.10_3	protein_coding	IARS2	-0.0883557	0.0873929	0.168967	0	0.0256313	0.606184	0.778208	0	249.405	277.128	262.259	252.782	277.292	285.54	261.627	272.152	264.134	60.3157	67.0201	63.4242	61.1323	67.0597	69.0544	63.2713	65.8166	63.8777
ENSG00000118873.16_4	protein_coding	RAB3GAP2	-0.0916595	0.282384	0.413169	0	-0.2223	0.015236	0.0730223	0	62.7488	61.9727	72.5755	68.3571	59.7486	67.4058	69.5362	61.5236	73.8841	6.06679	5.99176	7.01687	6.60902	5.77672	6.51705	6.72302	5.94834	7.14339
ENSG00000218283.2_4	processed_pseudogene	MORF4L1P1	-0.0335724	0.731575	0.810992	0	-0.0948512	0.33914	0.563645	0	10.4405	10.9952	11.0441	10.8617	11.3214	11.8576	12.937	10.4228	12.0242	10.7968	11.3704	11.421	11.2324	11.7077	12.2622	13.3784	10.7785	12.4345
ENSG00000226314.8_4	transcribed_unprocessed_pseudogene	ZNF192P1	0.919262	0.0136993	0.0387759	1	-0.130126	0.73989	0.86843	0	0.900955	0.299868	0.610734	1.30161	0.812537	0.592879	1.50161	0.675554	0.7453	0.353732	0.117734	0.239786	0.511037	0.319017	0.232776	0.589561	0.265235	0.292619
ENSG00000162817.7_3	protein_coding	C1orf115	-0.154454	0.0380623	0.088011	0	-0.107634	0.134898	0.318428	0	30.8974	34.7847	33.6412	31.6875	31.0389	38.4459	32.6889	32.5231	33.8366	10.6875	12.0321	11.6365	10.9607	10.7364	13.2985	11.3071	11.2498	11.7041
ENSG00000117791.16_3	protein_coding	2020-03-02	0.11846	0.222718	0.34716	0	0.0975763	0.311989	0.5365	0	15.2102	15.6931	14.6067	16.2028	15.9257	14.2747	15.4781	14.6692	14.3595	5.85685	6.04278	5.62446	6.23906	6.13236	5.49662	5.96001	5.6485	5.52925
ENSG00000186205.13_5	protein_coding	2020-03-01	-0.124756	0.128483	0.228571	0	-0.178086	0.0355735	0.132173	0	20.563	19.9412	20.8667	19.2998	19.6092	24.2624	21.1958	19.205	21.2659	2.25818	2.1899	2.29154	2.11946	2.15344	2.66445	2.32768	2.10905	2.33537
ENSG00000143507.18_3	protein_coding	DUSP10	0.435994	0.0959481	0.181591	0	0.281051	0.278184	0.500121	0	1.64292	2.59886	1.52683	2.60322	2.00426	2.09788	3.69627	2.46095	2.18621	0.581152	0.919298	0.54009	0.920844	0.70897	0.742087	1.30749	0.870515	0.773334
ENSG00000143498.18_3	protein_coding	TAF1A	-0.110383	0.189694	0.307201	0	0.038988	0.63277	0.798327	0	28.6716	32.5357	31.2492	27.5583	32.9348	30.1	31.7071	31.8958	33.4391	9.91752	11.2541	10.8091	9.53244	11.3922	10.4116	10.9675	11.0328	11.5666
ENSG00000225265.2_6	lncRNA	TAF1A-AS1	0.332118	0.354222	0.487346	0	-0.06555	0.859873	0.932713	0	1.11294	0.399824	0.559839	1.12208	1.13755	1.09455	1.32835	1.15809	1.14279	0.492235	0.176835	0.247607	0.496276	0.503119	0.484098	0.587505	0.512203	0.505437
ENSG00000154305.18_7	protein_coding	MIA3	0.078933	0.307711	0.439635	0	-0.0888538	0.254683	0.472225	0	76.1572	68.3699	71.9648	83.4378	71.4491	68.5004	75.3693	69.5338	82.2315	7.49947	6.73264	7.08664	8.21643	7.03586	6.74548	7.42189	6.84724	8.09763
ENSG00000272750.1_6	lncRNA	AL592148.3	-0.352798	0.305345	0.43732	0	-0.16081	0.627164	0.794889	0	1.05995	1.04954	0.814312	0.807897	1.08338	1.27697	0.750806	0.868569	1.24217	0.400585	0.396651	0.307752	0.305328	0.409442	0.482604	0.283751	0.328257	0.469451
ENSG00000186063.13_3	protein_coding	AIDA	0.00133451	0.988502	0.992836	0	0.0584783	0.527828	0.72535	0	29.3605	29.3871	26.4142	27.1543	28.9263	31.0122	29.3969	30.9307	28.222	6.93774	6.94402	6.24155	6.41643	6.83514	7.32801	6.94634	7.30877	6.66872
ENSG00000198113.3_3	protein_coding	TOR4A	-0.22821	0.00478708	0.0167068	0	0.0238005	0.739308	0.86803	0	61.7419	73.2178	68.504	58.5277	63.5404	70.5526	54.289	71.1261	65.487	14.8027	17.554	16.4239	14.032	15.2339	16.915	13.0158	17.0525	15.7006
ENSG00000228106.6_8	lncRNA	AL392172.1	0.189587	0.434096	0.5634	0	-0.115666	0.641254	0.804621	0	2.49087	1.39938	1.8322	2.60322	2.05843	2.50834	2.59894	2.75047	2.38496	2.03005	1.14049	1.49324	2.12162	1.67761	2.04428	2.11813	2.24162	1.94373
ENSG00000115392.11_4	protein_coding	FANCL	0.425409	0.000299175	0.00170918	0	0.286032	0.00818624	0.0460747	0	16.6942	12.8943	10.8914	16.3824	16.4133	12.1768	15.3049	14.7174	12.9682	6.92129	5.34591	4.51551	6.79202	6.80483	5.04844	6.34531	6.10175	5.37654
ENSG00000187554.14_5	protein_coding	TLR5	-0.523714	0.0971702	0.183494	0	-0.162631	0.577019	0.76087	0	1.11294	0.99956	1.27236	1.3465	1.57091	1.59621	0.462034	1.30285	1.44091	0.143921	0.129259	0.164537	0.174123	0.203143	0.206416	0.0597484	0.16848	0.186333
ENSG00000213337.9_4	protein_coding	ANKRD39	-0.342952	0.00639621	0.0210211	0	-0.0367476	0.738598	0.867619	0	11.0234	13.2442	15.0139	9.605	12.5672	11.8576	11.2621	13.4628	13.5148	2.1013	2.52462	2.86197	1.83092	2.39559	2.26031	2.14679	2.5663	2.57621
ENSG00000143514.17_4	protein_coding	TP53BP2	-0.124506	0.056865	0.120626	0	-0.124095	0.0574018	0.182699	0	64.8687	63.8719	65.5521	65.2153	62.0237	71.3279	61.335	65.6252	71.8469	10.8494	10.6827	10.9637	10.9074	10.3736	11.9297	10.2584	10.976	12.0165
ENSG00000272645.3_5	transcribed_unprocessed_pseudogene	GTF2IP20	-0.385169	0.043997	0.0984985	0	-0.328421	0.0795582	0.226843	0	6.99565	5.29767	10.5352	6.82224	7.42117	6.11122	4.85136	6.85204	7.99956	1.68773	1.27809	2.54165	1.6459	1.79039	1.47436	1.17041	1.65309	1.92993
ENSG00000185495.10_6	transcribed_unprocessed_pseudogene	AC138393.1	0.942514	0.0213607	0.0552864	0	0.265546	0.517855	0.71812	0	2.43788	0.399824	1.17057	2.82764	2.1126	0.775304	1.90589	2.02666	1.83841	0.56056	0.0919347	0.269159	0.650182	0.485766	0.178272	0.438237	0.466006	0.42272
ENSG00000143756.12_3	protein_coding	FBXO28	-0.0753475	0.29348	0.425008	0	-0.0822595	0.252565	0.469807	0	70.0625	70.3191	76.2908	76.3014	75.566	78.853	71.9618	71.5604	74.9772	11.6383	11.6809	12.6729	12.6747	12.5525	13.0985	11.9538	11.8871	12.4547
ENSG00000143753.13_4	protein_coding	DEGS1	0.115702	0.0596449	0.125016	0	0.082292	0.170107	0.368591	0	61.9539	63.7719	57.2563	58.5726	58.936	57.3725	65.4934	58.8697	56.8913	25.3287	26.0719	23.4081	23.9463	24.0949	23.4556	26.7757	24.0677	23.2589
ENSG00000143748.18_5	protein_coding	NVL	-0.0855317	0.253537	0.381601	0	0.0958135	0.197914	0.403862	0	27.1876	30.8864	29.0607	27.5134	30.2806	27.4093	25.1809	29.5313	28.4208	5.89114	6.69261	6.29702	5.96173	6.56133	5.93917	5.45631	6.39899	6.15835
ENSG00000143771.12_4	protein_coding	CNIH4	-0.0795305	0.296577	0.428334	0	0.0877399	0.246309	0.462944	0	32.8583	34.6348	33.0814	30.3859	36.185	37.8531	33.2087	37.3485	30.7561	6.45547	6.80447	6.49929	5.96973	7.10904	7.43675	6.5243	7.33762	6.04245
ENSG00000143727.16_3	protein_coding	ACP1	-0.145703	0.0185714	0.0495113	0	-0.0190901	0.737852	0.867137	0	85.5377	92.3094	96.954	87.1183	98.5879	103.252	90.6742	96.5559	90.9763	20.5619	22.1898	23.3062	20.9419	23.699	24.8202	21.7967	23.2106	21.8693
ENSG00000185842.15_4	protein_coding	DNAH14	-0.117646	0.294996	0.426519	0	-0.245152	0.0386916	0.13987	0	12.2424	10.1455	13.2835	13.6894	14.084	13.1802	12.7059	11.2914	15.5519	0.621662	0.515185	0.674527	0.695139	0.715177	0.669282	0.645201	0.573371	0.789719
ENSG00000143815.15_5	protein_coding	LBR	-0.00266624	0.964157	0.975946	0	0.100828	0.101279	0.264488	0	189.783	211.157	191.007	197.666	219.493	201.214	198.444	198.902	194.722	33.237	36.9802	33.4513	34.6174	38.4402	35.2389	34.7537	34.834	34.1019
ENSG00000198870.7_2	protein_coding	STKLD1	1.19452	0.0120549	0.0350663	1	-0.176289	0.737754	0.867137	0	0.847957	0.099956	0.254472	1.16696	0.433353	0.547273	0.866314	0.579046	0.44718	0.192455	0.0226863	0.0577559	0.264858	0.0983553	0.124211	0.196621	0.131422	0.101493
ENSG00000143742.13_4	protein_coding	SRP9	0.0152164	0.82446	0.880067	0	0.0969967	0.167418	0.365232	0	102.974	112.501	103.061	114.183	128.868	114.335	115.682	111.032	111.894	46.3846	50.6759	46.424	51.4337	58.0488	51.502	52.1089	50.0144	50.4029
ENSG00000065150.20_5	protein_coding	IPO5	-0.162121	0.0102129	0.0307024	0	-0.019236	0.737772	0.867137	0	511.106	589.491	565.896	507.898	556.805	585.582	523.023	556.222	573.881	52.8822	60.9923	58.551	52.5502	57.6104	60.5879	54.1151	57.5501	59.3773
ENSG00000242861.1_7	lncRNA	AL591895.1	0.435418	0.136116	0.238471	0	0.0569298	0.847585	0.926418	0	0.900955	1.09952	1.01789	1.16696	0.758368	0.775304	1.44386	0.820315	0.794987	2.58895	3.15953	2.92497	3.35334	2.17922	2.22788	4.14901	2.35723	2.28445
ENSG00000133302.13_4	protein_coding	SLF1	0.24523	0.00339654	0.0126557	0	-0.0251747	0.737161	0.867037	0	34.8192	30.2867	31.351	36.0861	30.7139	29.2791	36.5585	28.132	30.0604	5.07347	4.41304	4.56812	5.25806	4.47529	4.26623	5.32689	4.09908	4.38007
ENSG00000106789.13_3	protein_coding	CORO2A	0.489453	3.97228e-05	0.000317601	0	-0.032012	0.737261	0.867037	0	28.8305	21.1407	18.4747	25.4039	17.8758	18.9265	27.3178	17.7092	20.62	5.0456	3.69981	3.23323	4.4459	3.12843	3.31231	4.78085	3.09926	3.60868
ENSG00000143751.10_3	protein_coding	SDE2	-0.00156894	0.983009	0.989159	0	0.209954	0.00914214	0.0500304	0	53.1563	59.5238	53.3374	52.0196	65.1655	57.7829	59.8334	66.156	53.8107	13.3324	14.9295	13.3778	13.0473	16.3445	14.4928	15.0071	16.5929	13.4965
ENSG00000163041.11_4	protein_coding	H3F3A	0.143879	0.0700045	0.142022	0	0.0620612	0.418791	0.636702	0	21.0929	21.2906	19.0854	19.7935	18.3633	18.5161	21.3113	19.012	18.6325	5.5304	5.58223	5.00405	5.18969	4.81472	4.85477	5.58766	4.98479	4.88529
ENSG00000225518.3_5	lncRNA	LINC01703	-0.305859	0.349147	0.482565	0	0.333599	0.266919	0.485801	0	0.529973	0.799648	0.763417	0.628365	1.02921	0.592879	0.693051	1.06158	0.944047	0.328564	0.495752	0.47329	0.389563	0.638074	0.367563	0.429666	0.658143	0.585274
ENSG00000115310.18_5	protein_coding	RTN4	-0.398573	2.90424e-07	4.75183e-06	0	0.0172525	0.737171	0.867037	0	242.569	339.251	326.437	251.48	339.911	344.645	252.386	316.69	312.827	36.5095	51.0612	49.1326	37.8508	51.1607	51.8732	37.9871	47.6655	47.0842
ENSG00000183814.15_2	protein_coding	LIN9	0.00112296	0.990955	0.994331	0	-0.0783526	0.43411	0.649626	0	15.4752	14.9934	15.7773	16.0233	15.6007	16.9199	18.7124	16.7923	17.3407	3.48384	3.37537	3.55184	3.60723	3.51209	3.80906	4.2126	3.78035	3.90379
ENSG00000143799.13_3	protein_coding	PARP1	-0.0551571	0.273229	0.402927	0	-0.0840131	0.102179	0.265972	0	599.453	598.987	631.804	578.006	580.693	633.058	618.722	580.831	601.209	83.4544	83.3895	87.9582	80.4686	80.8427	88.1329	86.1369	80.8619	83.6989
ENSG00000204272.12_4	protein_coding	NBDY	-0.3496	0.000740061	0.00361538	0	-0.0288455	0.736625	0.866855	0	19.185	22.64	24.124	17.1903	24.3761	23.7152	18.3659	21.3282	21.8125	11.239	13.2631	14.1324	10.0705	14.2801	13.8929	10.7591	12.4945	12.7782
ENSG00000143801.17_7	protein_coding	PSEN2	0.170195	0.0485989	0.106634	0	0.0634404	0.443555	0.657585	0	21.3049	18.5918	16.7952	20.6911	20.4759	19.5194	20.445	18.9638	19.1294	5.75965	5.02618	4.54046	5.59371	5.53553	5.27694	5.52717	5.12672	5.1715
ENSG00000163050.17_5	protein_coding	COQ8A	0.112165	0.0900244	0.172877	0	-0.171716	0.0141954	0.069607	0	49.1285	42.2314	45.4488	48.5187	39.3268	47.5672	50.1885	39.8094	43.6746	6.30095	5.41637	5.82901	6.22274	5.04384	6.1007	6.43689	5.10573	5.60146
ENSG00000143776.18_6	protein_coding	CDC42BPA	-0.0747991	0.329356	0.462078	0	-0.00757644	0.920094	0.961469	0	112.354	127.944	126.676	117.37	115.705	113.924	117.126	119.718	124.813	7.99391	9.10308	9.0129	8.35073	8.23232	8.10559	8.33338	8.5178	8.88032
ENSG00000146414.16_5	protein_coding	SHPRH	-0.318364	0.0149276	0.0415308	0	-0.0398504	0.735518	0.866188	0	19.079	22.3402	26.4142	20.2423	25.2428	22.575	20.7915	25.3333	26.0358	1.07816	1.26244	1.49267	1.14389	1.42647	1.27571	1.17493	1.43158	1.47128
ENSG00000143740.14_5	protein_coding	SNAP47	0.00653164	0.9256	0.950227	0	-0.0615108	0.385015	0.607695	0	42.1329	40.932	41.3263	38.9137	36.6725	39.5861	39.7927	37.5897	39.3519	6.40317	6.22067	6.28059	5.91394	5.57333	6.01612	6.04752	5.71273	5.98052
ENSG00000081692.12_3	protein_coding	JMJD4	-0.0780166	0.442985	0.572012	0	0.137567	0.174991	0.375229	0	10.0165	10.5953	10.5861	8.43804	10.7797	9.89652	9.64496	11.1466	9.09266	2.32132	2.45547	2.45331	1.95551	2.49818	2.29352	2.23522	2.58323	2.10722
ENSG00000102384.13_2	protein_coding	CENPI	0.271992	0.00471527	0.0165127	0	-0.0295085	0.735239	0.865929	0	28.9365	25.039	25.549	32.0915	24.3761	25.129	30.4365	24.8507	25.1415	6.69672	5.79472	5.91276	7.42686	5.64131	5.81554	7.04386	5.75115	5.81844
ENSG00000063761.16_5	protein_coding	ADCK1	-0.441339	0.00230044	0.00916555	0	-0.041275	0.73503	0.865896	0	7.31363	8.99604	8.85564	6.05923	7.42117	8.80198	5.31339	8.2514	7.75112	1.38176	1.69961	1.67308	1.14476	1.40207	1.66295	1.00385	1.55893	1.46441
ENSG00000143761.16_4	protein_coding	ARF1	-0.058632	0.321865	0.454544	0	-0.0781788	0.191063	0.395342	0	528.648	541.562	556.175	506.327	504.152	571.353	542.37	510.284	515.102	161.124	165.06	169.514	154.321	153.658	174.14	165.306	155.527	156.995
ENSG00000143793.13_3	protein_coding	C1orf35	0.0106788	0.882643	0.92048	0	0.0179842	0.803415	0.903838	0	29.3075	29.0872	29.6715	29.5331	29.3597	28.3214	28.7616	29.6279	29.017	6.80305	6.7519	6.88753	6.85542	6.81515	6.57414	6.67633	6.8774	6.73561
ENSG00000162910.19_5	protein_coding	MRPL55	0.0399837	0.683373	0.774565	0	0.0275461	0.778216	0.890533	0	26.0747	23.5896	25.1928	22.3518	21.2885	20.4315	22.0044	24.8507	22.9552	13.8254	12.5078	13.3578	11.8514	11.2876	10.8333	11.6672	13.1764	12.1714
ENSG00000143774.16_3	protein_coding	GUK1	-0.15052	0.0920928	0.175886	0	-0.0373195	0.663147	0.819198	0	70.6454	78.2156	76.4944	66.6066	66.3572	76.2534	63.1254	72.1395	69.7104	14.9514	16.5536	16.1893	14.0966	14.0439	16.1383	13.3599	15.2676	14.7535
ENSG00000198835.4_3	protein_coding	GJC2	0.78031	0.086709	0.167959	0	0.280475	0.549804	0.741707	0	0.900955	0.449802	0.712523	1.48115	0.595861	0.456061	0.462034	1.01333	0.546554	0.416145	0.207761	0.32911	0.684132	0.275224	0.210652	0.213411	0.468051	0.25245
ENSG00000001617.12_4	protein_coding	SEMA3F	-0.414839	0.000318351	0.00179739	0	0.0311842	0.734999	0.865896	0	15.3162	19.6913	19.7471	13.6894	18.5259	17.9232	12.9947	19.012	18.3841	3.17369	4.08026	4.09181	2.83659	3.83876	3.71388	2.69265	3.9395	3.80938
ENSG00000086300.15_2	protein_coding	SNX10	-0.345481	0.000153159	0.000971105	0	0.0244353	0.734755	0.865712	0	22.8948	29.3871	29.3661	20.8707	29.5764	28.7318	23.275	27.5529	26.9302	6.50792	8.35335	8.34739	5.93254	8.40715	8.1671	6.61597	7.83199	7.65497
ENSG00000154358.21_4	protein_coding	OBSCN	0.183866	0.18519	0.301667	0	0.160379	0.245075	0.461493	0	36.3562	31.3362	29.8751	30.5206	27.4096	20.2491	24.8921	31.6063	31.0045	0.919269	0.792339	0.755393	0.771715	0.693054	0.512001	0.629399	0.799167	0.783951
ENSG00000132424.16_5	protein_coding	PNISR	0.284504	0.00907168	0.0278955	0	-0.0337575	0.73459	0.865659	0	133.553	90.3603	110.39	148.608	115.218	101.747	126.309	122.275	123.571	12.2853	8.31205	10.1546	13.6702	10.5986	9.35951	11.6189	11.2478	11.367
ENSG00000287315.1_1	lncRNA	AL670729.3	0.5363	0.0202152	0.0528968	0	0.273235	0.221318	0.434356	0	3.12684	2.69881	2.7992	2.91741	2.16677	1.505	2.88771	2.55745	1.88809	0.647648	0.558992	0.579784	0.604268	0.448792	0.311724	0.598118	0.529713	0.391072
ENSG00000154370.16_4	protein_coding	TRIM11	0.0556899	0.392207	0.523004	0	0.0732588	0.263072	0.481637	0	57.3431	58.6242	58.0197	60.1883	59.6944	57.9198	60.873	62.2474	55.6988	6.75579	6.90672	6.8355	7.09099	7.0328	6.82372	7.17166	7.33358	6.56206
ENSG00000175505.11_4	protein_coding	CLCF1	0.329508	0.00320262	0.0120577	0	-0.0344867	0.733879	0.865448	0	12.5604	9.44584	10.3316	11.9838	9.37126	8.80198	12.5904	9.98854	10.4342	6.84116	5.1448	5.62722	6.52713	5.10417	4.79411	6.85753	5.44038	5.68312
ENSG00000168159.12_4	protein_coding	RNF187	0.155806	0.0264853	0.0655817	0	0.00449355	0.945368	0.974688	0	169.538	147.435	150.24	151.167	144.198	147.992	158.304	139.598	131.62	50.0704	43.5426	44.3711	44.6446	42.5866	43.707	46.7527	41.2281	38.8718
ENSG00000235194.8_5	protein_coding	PPP1R3E	0.739485	0.000654436	0.00327468	1	0.543653	0.00816768	0.0459882	0	6.20069	5.49758	4.27514	8.66245	6.5003	3.28364	6.41073	6.70728	5.31648	1.11764	0.990912	0.770572	1.56137	1.17165	0.59186	1.1555	1.20895	0.958269
ENSG00000177788.6_7	lncRNA	AL162595.1	0.118623	0.440475	0.569476	0	-0.288723	0.07973	0.227074	0	8.63857	4.79789	6.92165	6.55294	5.7961	5.70076	6.6995	5.88697	7.55238	1.05387	0.585323	0.844412	0.799432	0.7071	0.695469	0.817311	0.718186	0.921359
ENSG00000168118.11_3	protein_coding	RAB4A	-0.0571375	0.413594	0.543864	0	-0.0553879	0.427156	0.64389	0	52.0434	56.0753	51.8615	49.7755	47.1813	57.3725	52.9607	51.5351	51.6245	15.7231	16.9412	15.6681	15.0379	14.2542	17.3331	16.0002	15.5695	15.5965
ENSG00000154429.11_3	protein_coding	CCSAP	0.00843754	0.911521	0.940155	0	0.190342	0.0192321	0.0858759	0	32.3284	38.0333	35.4226	39.0484	39.4351	35.4359	34.075	42.3669	34.1844	5.16675	6.07852	5.66127	6.24075	6.30256	5.66341	5.4459	6.77111	5.46339
ENSG00000163412.13_4	protein_coding	EIF4E3	-2.05169	6.09301e-12	4.33239e-10	-1	-0.332634	0.00815467	0.0459329	0	2.43788	8.34633	11.6548	2.60322	9.91296	11.9944	3.17649	8.73394	10.2851	0.225562	0.772236	1.07835	0.240861	0.917187	1.10977	0.293901	0.8081	0.951623
ENSG00000125249.7_3	protein_coding	RAP2A	0.487951	2.83369e-06	3.33547e-05	0	0.0257598	0.733959	0.865448	0	62.4309	46.1797	43.7692	65.3499	50.8648	47.5672	62.8367	41.4983	44.569	11.1028	8.21264	7.78397	11.6219	9.04585	8.45939	11.1749	7.3801	7.92619
ENSG00000064933.17_4	protein_coding	PMS1	-0.295527	0.00039794	0.00216581	0	-0.0232748	0.733729	0.865351	0	30.5265	36.6839	38.4762	34.0215	38.7851	37.625	31.4761	40.6297	41.9356	5.59708	6.72605	7.05468	6.23789	7.11132	6.89861	5.77119	7.44953	7.68895
ENSG00000031081.10_4	protein_coding	ARHGAP31	-0.65818	0.00187102	0.00775436	-1	0.0588567	0.731774	0.864317	0	3.02085	6.19727	4.93676	3.18671	4.65855	4.24137	2.59894	3.71554	4.81961	0.321915	0.660409	0.526083	0.339589	0.496435	0.451979	0.276955	0.395945	0.513598
ENSG00000156502.14_4	protein_coding	SUPV3L1	-0.184205	0.00469758	0.0164817	0	-0.0198244	0.731537	0.86421	0	63.0138	71.5685	69.2165	66.1129	73.0742	78.0777	62.9522	70.7401	70.9526	14.7194	16.7177	16.1683	15.4433	17.0694	18.2382	14.705	16.5242	16.5738
ENSG00000135775.14_4	protein_coding	COG2	-0.132437	0.0733315	0.147347	0	-0.176842	0.0205591	0.0902609	0	42.0269	41.6317	44.4818	43.6265	44.1479	52.5838	46.9542	42.7529	48.0967	3.83947	3.80337	4.06375	3.98561	4.03324	4.80393	4.28962	3.9058	4.394
ENSG00000119280.16_3	protein_coding	C1orf198	-0.0567906	0.295471	0.427034	0	0.051582	0.338291	0.562688	0	52.9443	58.8241	55.5259	53.1417	56.4443	55.9131	54.9821	58.2906	56.0466	10.2585	11.3978	10.7587	10.2968	10.9367	10.8338	10.6534	11.2944	10.8596
ENSG00000143643.13_4	protein_coding	TTC13	-0.0280638	0.757906	0.830348	0	-0.124549	0.183884	0.386672	0	15.8992	13.0942	15.1666	16.3824	16.7383	16.3726	15.8824	15.2965	17.5891	3.77474	3.10879	3.6008	3.88945	3.97395	3.88713	3.77076	3.63164	4.17595
ENSG00000173409.14_4	protein_coding	ARV1	-0.267076	0.162028	0.272934	0	0.15201	0.397761	0.618643	0	2.33188	3.49846	3.40993	3.41112	4.49604	3.92212	3.17649	4.00507	3.42838	1.09736	1.64633	1.60467	1.60523	2.11578	1.84571	1.49482	1.88474	1.61336
ENSG00000279069.1_5	TEC	AC015813.5	0.513348	0.0154921	0.0427716	0	-0.0713325	0.730886	0.863763	0	2.86186	1.54932	2.18846	2.69299	1.78758	1.68743	2.6567	2.12317	1.88809	1.89026	1.02333	1.44548	1.77873	1.1807	1.11455	1.75475	1.40236	1.24709
ENSG00000143633.13_5	protein_coding	C1orf131	0.080765	0.245857	0.373016	0	0.142246	0.0475859	0.160798	0	22.6299	22.9899	21.681	22.4865	24.0511	21.9821	23.4482	24.4647	21.1168	4.18065	4.24716	4.00537	4.15416	4.44321	4.06099	4.33184	4.51962	3.90113
ENSG00000272333.5_2	protein_coding	KMT2B	0.43168	0.000169962	0.00105584	0	0.0325276	0.729777	0.862807	0	95.1302	63.4221	71.0487	95.6461	67.3864	56.8708	81.549	75.8068	74.3313	9.25481	6.17007	6.91202	9.305	6.55574	5.53272	7.93356	7.37492	7.23137
ENSG00000116903.7_2	protein_coding	EXOC8	0.192022	0.0268782	0.0664177	0	0.165282	0.0527471	0.172606	0	28.8305	29.8369	27.1268	32.7198	32.5015	27.5005	34.2483	31.7028	29.2158	5.65305	5.85037	5.31897	6.41566	6.37284	5.39225	6.71535	6.21623	5.72858
ENSG00000010072.16_4	protein_coding	SPRTN	0.0671903	0.436388	0.56554	0	0.0448517	0.601524	0.776371	0	21.8879	20.441	22.3427	22.1274	24.1594	22.8487	25.2386	23.4996	20.769	3.70604	3.46106	3.78305	3.7466	4.09066	3.86872	4.27339	3.97894	3.5166
ENSG00000135766.9_3	protein_coding	EGLN1	-0.109543	0.425895	0.555101	0	0.167963	0.21644	0.428398	0	9.80451	10.8952	10.5861	8.5278	10.0755	8.48274	7.4503	10.3263	8.84423	1.82206	2.02476	1.9673	1.5848	1.87241	1.57642	1.38456	1.91903	1.6436
ENSG00000077782.20_5	protein_coding	FGFR1	-0.250115	0.00136574	0.00600337	0	0.0231003	0.729368	0.862535	0	73.0833	79.1652	84.5866	72.7556	85.0997	78.853	61.104	86.1331	83.0264	5.27982	5.7192	6.11087	5.25615	6.14794	5.69664	4.41439	6.22259	5.99815
ENSG00000125503.13_4	protein_coding	PPP1R12C	0.233779	0.00485032	0.0168785	0	0.0258023	0.729213	0.862492	0	81.6159	64.2717	64.5342	71.3643	63.6488	59.8808	70.518	65.5287	65.6858	10.4596	8.2368	8.27043	9.14575	8.15696	7.67408	9.03729	8.39789	8.41802
ENSG00000162946.22_6	protein_coding	DISC1	0.462922	0.0370645	0.0861732	0	-0.294261	0.202874	0.41087	0	2.96785	1.74923	1.62862	2.28904	1.35423	1.73303	2.48343	1.44761	2.2359	0.229959	0.135536	0.126191	0.177363	0.10493	0.134281	0.192425	0.112166	0.173245
ENSG00000116983.13_3	protein_coding	HPCAL4	-1.13148	3.32276e-08	7.50402e-07	-1	-0.344094	0.00813408	0.0458348	0	5.45873	11.1451	12.062	5.78993	9.91296	14.594	6.58399	9.65077	12.2726	1.14727	2.34239	2.5351	1.21688	2.08343	3.06725	1.38377	2.02832	2.57936
ENSG00000117697.15_3	protein_coding	NSL1	-0.181213	0.00641176	0.0210578	0	-0.020561	0.728598	0.862119	0	33.3353	36.7838	37.6619	33.3931	38.6226	38.9932	32.9199	36.0456	36.321	2.40393	2.65262	2.71594	2.4081	2.78522	2.81194	2.37398	2.59938	2.61924
ENSG00000135749.19_8	protein_coding	PCNX2	0.0539094	0.560907	0.675816	0	0.232304	0.0184449	0.0834706	0	20.9339	22.4901	21.5284	19.0754	21.5593	16.0077	19.1744	22.8723	19.5766	1.51399	1.62654	1.55698	1.37957	1.55922	1.15772	1.38674	1.65418	1.41582
ENSG00000143674.11_5	protein_coding	MAP3K21	-0.137691	0.0941133	0.178892	0	-0.0382359	0.6278	0.795093	0	43.9878	44.6304	44.7362	41.9658	47.5605	49.209	45.5681	48.5916	50.581	5.5261	5.60683	5.62013	5.27208	5.97494	6.18203	5.72464	6.10447	6.3544
ENSG00000135750.14_2	protein_coding	KCNK1	-0.163833	0.0477827	0.105179	0	0.00738254	0.923943	0.963536	0	23.2128	26.3884	26.9232	22.0376	26.272	27.6829	26.2782	27.6494	25.2905	6.40001	7.27554	7.42299	6.076	7.24346	7.63245	7.24516	7.62323	6.97285
ENSG00000138172.11_3	protein_coding	CALHM2	-0.401158	2.05986e-05	0.000182591	0	-0.0244248	0.728514	0.86209	0	34.7133	44.9302	44.4818	33.5726	43.4437	46.7463	32.1691	42.1256	41.4387	11.169	14.4563	14.312	10.802	13.978	15.0406	10.3504	13.5539	13.3329
ENSG00000168275.15_3	protein_coding	COA6	-0.00973975	0.908712	0.938967	0	-0.0286068	0.736477	0.86675	0	16.7472	16.5427	18.4238	17.1005	16.7924	17.3759	18.0771	17.8539	16.4463	7.35815	7.26833	8.09482	7.5134	7.37805	7.63441	7.94248	7.84443	7.22596
ENSG00000059588.10_3	protein_coding	TARBP1	0.19939	0.229506	0.354908	0	-0.0390764	0.812835	0.908967	0	26.4987	15.1433	19.5944	26.6157	23.7261	17.5584	20.3295	23.6444	27.1289	3.38901	1.93674	2.50599	3.40398	3.03442	2.2456	2.60001	3.02396	3.46962
ENSG00000196141.14_6	protein_coding	SPATS2L	-0.308499	2.79665e-05	0.000237123	0	0.0194629	0.728445	0.862079	0	72.8713	96.5075	89.8796	73.5187	91.6542	96.5025	76.0624	91.0067	88.9888	6.97133	9.23252	8.59845	7.03326	8.76822	9.23204	7.27661	8.70628	8.51324
ENSG00000173726.11_3	protein_coding	TOMM20	-0.0170599	0.739332	0.817225	0	0.0340673	0.508103	0.710713	0	296.043	321.059	308.929	322.845	335.849	329.367	326.543	322.673	318.343	86.1091	93.3853	89.8573	93.9048	97.6873	95.802	94.9804	93.855	92.5953
ENSG00000108387.14_4	protein_coding	2020-09-04	0.506029	0.00800667	0.0252005	0	0.0624171	0.727532	0.861432	0	5.35273	3.84831	4.17335	4.71273	3.30432	4.01334	6.17971	4.68062	3.17995	0.668089	0.480318	0.520887	0.588209	0.412421	0.500916	0.771307	0.584201	0.396898
ENSG00000173559.12_4	protein_coding	NABP1	0.322965	0.00988198	0.0299091	0	0.040248	0.727341	0.861407	0	39.218	26.6883	28.3991	42.28	33.8016	28.5494	36.2119	36.4316	37.3644	2.84065	1.93309	2.05701	3.06243	2.44832	2.0679	2.62291	2.63883	2.70639
ENSG00000152904.11_5	protein_coding	GGPS1	0.0732335	0.435069	0.564358	0	0.145174	0.128249	0.308615	0	13.6203	16.4428	14.1487	15.8886	15.7091	15.4149	15.8824	15.586	13.5645	3.57582	4.31682	3.71454	4.17134	4.12419	4.04696	4.16971	4.09188	3.56116
ENSG00000168143.9_3	protein_coding	FAM83B	-0.656688	0.00166169	0.00704875	-1	-0.0600577	0.7274	0.861407	0	9.38053	15.843	14.2505	11.3554	16.7924	19.0634	13.0525	18.3365	19.7753	1.50233	2.53732	2.28226	1.81862	2.68937	3.05307	2.0904	2.93665	3.16709
ENSG00000214279.13_3	protein_coding	SCART1	1.12564	7.63407e-05	0.000545113	1	0.0873931	0.725605	0.86027	0	5.14074	1.69925	2.54472	7.49549	3.57516	2.46273	4.62034	3.23301	2.9812	0.64139	0.212009	0.317495	0.935183	0.446059	0.307265	0.576462	0.403369	0.371953
ENSG00000162885.13_3	protein_coding	B3GALNT2	-0.110515	0.14561	0.251253	0	-0.00372687	0.959468	0.982201	0	50.1355	54.4261	54.966	51.3015	56.1192	57.2813	49.8419	52.4519	51.0779	5.96425	6.47467	6.5389	6.10296	6.67609	6.81433	5.92933	6.23982	6.07636
ENSG00000183765.22_6	protein_coding	CHEK2	-0.42729	4.02642e-06	4.50428e-05	0	-0.0229961	0.72544	0.860215	0	27.6646	35.9342	34.8627	25.1795	35.8058	36.0288	26.1049	32.7161	35.1782	6.15727	7.99782	7.75934	5.60415	7.96924	8.01888	5.81013	7.28157	7.82955
ENSG00000143669.13_3	protein_coding	LYST	-0.0798887	0.552136	0.668783	0	-0.250833	0.0761396	0.22015	0	10.0695	10.0956	12.9781	12.7468	10.0213	9.7141	12.1284	10.9536	14.4091	0.513383	0.514712	0.661675	0.649884	0.510926	0.495264	0.618354	0.558459	0.734635
ENSG00000181790.11_4	protein_coding	ADGRB1	0.541879	0.0122421	0.0354537	0	-0.0739859	0.72414	0.859179	0	4.50477	2.14905	3.6644	4.98203	3.03347	3.01	4.44708	3.90856	2.93151	0.612394	0.29215	0.498151	0.677275	0.412381	0.40919	0.604551	0.531343	0.39852
ENSG00000086619.13_2	protein_coding	ERO1B	0.133989	0.245869	0.373016	0	0.0853303	0.455648	0.667647	0	8.74456	9.49582	8.14312	9.15617	7.9087	8.43713	9.70272	9.21648	8.54611	1.63114	1.77128	1.51895	1.70792	1.47523	1.5738	1.80987	1.71917	1.59413
ENSG00000116977.18_3	protein_coding	LGALS8	-0.0817886	0.260012	0.388792	0	-0.058621	0.414458	0.63306	0	37.3631	38.9329	37.0512	39.8563	39.4351	41.3191	38.6376	39.4234	44.2708	3.8479	4.00956	3.81578	4.10466	4.06129	4.25532	3.97916	4.06008	4.5593
ENSG00000273058.2_6	lncRNA	AL359921.2	0.22941	0.502547	0.625571	0	-0.247184	0.496205	0.700865	0	1.11294	0.549758	1.17057	1.25673	0.920876	0.501667	0.924068	0.916823	1.19248	2.04962	1.01245	2.15575	2.31442	1.6959	0.923881	1.70178	1.68844	2.1961
ENSG00000119285.11_4	protein_coding	HEATR1	-0.0112474	0.866274	0.908847	0	-0.154245	0.030891	0.120256	0	190.737	186.018	207.802	208.931	182.875	189.995	204.623	178.443	211.367	21.0504	20.5295	22.9337	23.0583	20.1827	20.9684	22.5829	19.6935	23.3271
ENSG00000137075.18_4	protein_coding	RNF38	-0.298997	0.00121191	0.00543643	0	-0.0276079	0.723907	0.859179	0	25.6507	33.2854	34.4556	30.4308	33.9099	34.6606	30.9563	37.831	38.0103	4.179	5.42283	5.61348	4.95777	5.52458	5.64689	5.04338	6.16341	6.19262
ENSG00000085721.12_3	protein_coding	RRN3	-0.290637	2.21816e-05	0.000193416	0	0.0183505	0.723999	0.859179	0	110.446	144.386	136.092	112.253	138.24	144.07	116.028	136.944	134.055	26.5752	34.7417	32.7459	27.0098	33.2627	34.6655	27.9183	32.951	32.2557
ENSG00000138413.13_2	protein_coding	IDH1	-0.142424	0.0133385	0.0379885	0	-0.0186192	0.72371	0.859082	0	144.365	154.482	157.264	137.567	160.016	164.41	145.194	150.841	149.607	30.5793	32.7223	33.3116	29.1394	33.8944	34.8253	30.755	31.9512	31.6896
ENSG00000135953.11_3	protein_coding	MFSD9	-0.306927	0.00399067	0.0144046	0	0.0326294	0.723543	0.858954	0	13.8323	16.1929	15.1157	14.1831	17.5508	17.8776	12.8792	18.0952	17.6388	2.48024	2.90351	2.71036	2.54314	3.147	3.20559	2.30934	3.24461	3.16277
ENSG00000099399.6_4	protein_coding	MAGEB2	-0.388508	6.96472e-07	1.00107e-05	0	0.0188161	0.723461	0.858928	0	142.775	191.766	183.22	141.158	185.367	197.11	148.082	195.669	185.033	88.8456	119.331	114.014	87.8392	115.35	122.657	92.1481	121.761	115.142
ENSG00000174371.17_4	protein_coding	EXO1	0.126632	0.0451197	0.100389	0	0.0109613	0.854766	0.930507	0	71.0694	66.7207	65.8066	71.9477	69.8782	69.7317	79.2389	68.4239	67.872	17.179	16.1278	15.9068	17.3913	16.891	16.8556	19.1537	16.5395	16.4061
ENSG00000143702.16_5	protein_coding	CEP170	0.000976612	0.992211	0.995107	0	-0.0223764	0.823122	0.912465	0	63.6498	63.1222	66.8244	66.2027	69.0115	62.9364	68.0923	62.6817	68.0708	5.81861	5.77038	6.10883	6.05199	6.30876	5.7534	6.22473	5.73011	6.22276
ENSG00000152242.11_5	protein_coding	C18orf25	0.182254	0.00486307	0.0169106	0	0.020602	0.722792	0.858345	0	67.5186	56.9749	55.475	65.8436	57.4735	57.4637	63.6452	61.6684	60.7171	7.05229	5.95101	5.79434	6.87734	6.00308	6.00206	6.64771	6.44124	6.34188
ENSG00000178927.18_6	protein_coding	CYBC1	0.276054	0.00111287	0.00506392	0	0.0259928	0.722365	0.857979	0	71.0694	53.6764	56.0348	68.0429	57.4193	53.724	63.703	59.497	57.8353	9.82029	7.41694	7.74282	9.40209	7.93413	7.42352	8.8024	8.22122	7.99161
ENSG00000183955.13_5	protein_coding	KMT5A	-0.162839	0.0105628	0.0315555	0	0.0205625	0.721579	0.857641	0	69.4265	79.2651	81.3294	67.5941	79.087	79.9931	70.8645	77.6404	71.3004	15.1785	17.3295	17.7808	14.7779	17.2905	17.4887	15.4929	16.9743	15.5882
ENSG00000035687.10_4	protein_coding	ADSS	-0.0899196	0.185542	0.30214	0	0.1169	0.0884491	0.242617	0	77.3761	93.8087	82.2455	84.7395	97.0711	94.6783	88.133	97.907	89.287	22.4865	27.2621	23.9016	24.6264	28.2102	27.5148	25.6126	28.4531	25.948
ENSG00000121644.19_3	protein_coding	DESI2	0.0823914	0.189438	0.30689	0	0.157514	0.0175182	0.0806138	0	107.638	116.849	105.759	116.966	125.347	111.005	115.162	115.857	104.143	21.8066	23.6727	21.426	23.6964	25.3945	22.4889	23.331	23.4719	21.0987
ENSG00000203667.10_3	protein_coding	COX20	0.29627	0.056534	0.120136	0	0.155725	0.302966	0.526939	0	8.79756	6.74703	5.85286	7.04666	6.33779	6.02001	7.56581	8.05839	7.15488	1.92507	1.47637	1.28071	1.54194	1.38683	1.31729	1.65554	1.76332	1.56562
ENSG00000153187.20_6	protein_coding	HNRNPU	-0.0403486	0.389255	0.520063	0	-0.126978	0.0123422	0.0629401	0	1204.42	1170.88	1249.61	1219.75	1132.41	1237.11	1240.45	1147.72	1281.82	53.5011	52.0116	55.5087	54.182	50.3023	54.9534	55.1016	50.9825	56.9393
ENSG00000118898.16_5	protein_coding	PPL	-0.213272	0.00807472	0.0253594	0	0.0258155	0.721676	0.857641	0	102.709	126.894	124.895	105.386	114.08	109.956	103.9	127.197	126.999	13.3405	16.4819	16.2222	13.6882	14.8175	14.2819	13.4953	16.5212	16.4955
ENSG00000259319.1_6	lncRNA	AF111167.2	-0.98668	0.00532346	0.0181958	-1	-0.100058	0.721763	0.857641	0	0.582971	0.949582	0.966995	0.718131	0.866707	1.14015	0.288771	1.20635	1.14279	0.143624	0.233945	0.238235	0.176923	0.213527	0.280895	0.0711435	0.297203	0.281546
ENSG00000185420.19_5	protein_coding	SMYD3	-0.0159712	0.912089	0.940235	0	0.295478	0.0468436	0.159359	0	5.67071	8.6462	6.10734	6.73248	8.66707	6.84092	7.16153	6.99681	6.80708	0.966709	1.47395	1.04114	1.14771	1.47751	1.1662	1.22085	1.19277	1.16043
ENSG00000146242.8_2	protein_coding	TPBG	0.335522	0.00010695	0.00072054	0	0.0251681	0.719986	0.856618	0	53.0503	44.0306	39.9013	49.955	37.4851	38.3547	48.3403	40.485	41.7368	7.684	6.37755	5.77944	7.23566	5.42947	5.55544	7.00179	5.86399	6.04531
ENSG00000117479.15_6	protein_coding	SLC19A2	-0.494346	2.42832e-05	0.000209463	0	-0.0312176	0.719966	0.856618	0	22.7889	28.7873	29.2643	22.3069	34.0724	34.1134	21.9466	29.6761	31.0045	5.22201	6.59655	6.70585	5.11158	7.80761	7.81699	5.02902	6.80021	7.1046
ENSG00000184060.11_5	protein_coding	ADAP2	-0.505242	7.92374e-06	8.09826e-05	0	0.028782	0.719488	0.856324	0	10.1755	15.4932	14.3013	11.2208	15.6549	15.9165	11.0888	15.9238	15.8997	2.71346	4.13152	3.81369	2.99221	4.17464	4.24441	2.95702	4.24634	4.23993
ENSG00000197472.15_4	protein_coding	ZNF695	-0.200738	0.160644	0.271232	0	-0.302948	0.0416388	0.146757	0	7.68461	6.64708	7.63417	7.18131	6.22945	7.02334	6.00645	6.61077	9.44047	2.04596	1.76972	2.03253	1.91196	1.65853	1.8699	1.59916	1.76006	2.51344
ENSG00000262877.5_6	lncRNA	AC110285.2	0.69648	0.00499431	0.0172837	1	-0.0864773	0.717267	0.854386	0	3.28583	1.79921	2.39204	4.35367	1.73341	2.55394	4.15831	3.28126	2.33527	2.01833	1.10516	1.46931	2.67424	1.06475	1.56876	2.55424	2.01552	1.43444
ENSG00000188295.14_2	protein_coding	ZNF669	-0.21227	0.0967584	0.182836	0	-0.0238644	0.843277	0.923738	0	7.47262	8.04646	8.65206	6.50806	7.96287	8.2091	6.64174	7.47934	7.00582	3.77405	4.06387	4.36973	3.2869	4.02165	4.14601	3.35442	3.77745	3.53829
ENSG00000196418.12_4	protein_coding	ZNF124	-0.0867307	0.408962	0.539316	0	-0.078583	0.452321	0.664628	0	10.0165	9.74571	11.1459	10.0089	10.9422	11.4927	11.1466	10.6158	10.3845	2.21751	2.15756	2.46754	2.21584	2.42244	2.54433	2.46769	2.3502	2.29899
ENSG00000259865.1_6	lncRNA	AL390728.6	-0.230353	0.31832	0.451023	0	-0.139055	0.538593	0.732764	0	2.22589	1.69925	3.35904	2.37881	2.87097	2.59955	2.54119	3.03999	2.43465	1.78643	1.36377	2.69585	1.90916	2.30415	2.08631	2.03948	2.4398	1.95397
ENSG00000227671.4_5	transcribed_unprocessed_pseudogene	AL390728.4	-0.00948187	0.937596	0.95784	0	-0.230097	0.0732079	0.214859	0	23.0538	14.6436	21.681	20.6463	20.5301	18.6073	18.1348	18.0469	22.1106	10.6731	6.77943	10.0375	9.55846	9.50468	8.61449	8.39576	8.35506	10.2364
ENSG00000162714.12_3	protein_coding	ZNF496	-0.0407628	0.469662	0.596208	0	0.0159802	0.774941	0.888778	0	78.86	85.5124	81.6347	76.5258	78.2744	81.1789	77.8528	78.7502	77.064	7.48837	8.12006	7.75185	7.26672	7.43276	7.70856	7.39272	7.47795	7.31783
ENSG00000175137.11_3	protein_coding	SH3BP5L	0.120152	0.0779697	0.154488	0	0.143356	0.038256	0.138886	0	48.4926	46.0797	43.3112	45.1974	48.6439	44.6484	50.4195	51.5351	44.4696	8.4718	8.05027	7.5666	7.89612	8.49824	7.80021	8.80844	9.00333	7.76897
ENSG00000171161.13_4	protein_coding	ZNF672	0.0592542	0.41312	0.543458	0	-0.0115513	0.872385	0.939343	0	37.7871	39.5326	37.2039	40.6193	35.7516	39.1756	38.4066	35.9974	35.7744	10.1008	10.5674	9.9449	10.8579	9.55671	10.472	10.2664	9.62239	9.56279
ENSG00000171163.15_3	protein_coding	ZNF692	0.131166	0.177464	0.292331	0	-0.0852522	0.377653	0.59988	0	53.1563	38.3831	47.3828	54.1291	44.4187	41.8208	44.2975	47.8678	49.5376	13.5292	9.76918	12.0597	13.7768	11.3053	10.6441	11.2745	12.1832	12.6082
ENSG00000178694.10_3	protein_coding	NSUN3	-0.304085	0.0135199	0.0383915	0	-0.0403904	0.715246	0.85283	0	15.5812	16.5427	14.7594	14.9012	19.3926	20.7508	15.0739	18.7707	20.62	1.759	1.86755	1.66622	1.68223	2.18927	2.3426	1.70172	2.11907	2.32784
ENSG00000184731.6_3	protein_coding	FAM110C	0.00918889	0.894464	0.928989	0	0.029342	0.671762	0.82567	0	25.4387	26.8382	25.8035	27.9173	27.2471	27.6829	26.798	27.2634	26.1849	6.22278	6.56512	6.31201	6.82909	6.66514	6.77175	6.55528	6.66913	6.4053
ENSG00000035115.21_5	protein_coding	SH3YL1	0.0882391	0.291302	0.422617	0	0.0639162	0.441458	0.655419	0	21.5699	20.3411	21.1212	25.2692	24.1053	21.3437	22.1199	23.5479	22.5578	1.93192	1.82186	1.89173	2.26325	2.159	1.91166	1.98118	2.10908	2.0204
ENSG00000148925.10_4	protein_coding	BTBD10	-0.239423	0.00308746	0.0117035	0	-0.025743	0.714792	0.852634	0	26.0217	32.6356	31.7073	27.8725	32.9348	35.3903	30.9563	32.7161	32.8926	7.44541	9.33781	9.07218	7.97495	9.42342	10.126	8.85731	9.36083	9.41133
ENSG00000151353.15_5	protein_coding	TMEM18	-0.015346	0.825008	0.880534	0	0.0766226	0.274294	0.494792	0	30.2615	34.7847	31.4019	32.5403	34.2349	33.3837	33.9018	34.0189	32.8926	3.57321	4.1073	3.70786	3.84228	4.04238	3.94187	4.00304	4.01688	3.88388
ENSG00000166689.16_5	protein_coding	PLEKHA7	-0.318429	0.0157768	0.0433915	0	0.0430401	0.714487	0.852615	0	6.73066	8.54624	8.39759	6.19388	7.47534	7.29698	6.46848	8.83045	8.49642	0.613105	0.778488	0.764947	0.564208	0.680939	0.664691	0.589222	0.804377	0.77395
ENSG00000032389.12_8	protein_coding	EIPR1	-0.167091	0.0418836	0.0948114	0	-0.081794	0.294855	0.517627	0	22.0469	26.7382	26.7196	24.192	25.297	27.7741	25.8162	24.3682	26.3339	3.81764	4.63	4.62677	4.1891	4.38043	4.80937	4.47033	4.2196	4.55999
ENSG00000171853.16_6	protein_coding	TRAPPC12	0.077925	0.2976	0.429552	0	0.0480438	0.517037	0.717577	0	26.8696	24.7891	25.1928	27.3339	25.7304	23.9432	24.2568	26.4431	25.3402	2.92284	2.69652	2.74043	2.97333	2.79891	2.6045	2.63862	2.87644	2.75647
ENSG00000225234.1_6	lncRNA	TRAPPC12-AS1	0.485301	0.23592	0.362043	0	0.502026	0.219044	0.432102	0	0.582971	0.99956	0.407156	1.25673	0.487522	0.501667	0.693051	1.10984	0.944047	0.642038	1.10084	0.448409	1.38406	0.536919	0.552497	0.763272	1.22229	1.0397
ENSG00000182551.14_3	protein_coding	ADI1	0.020682	0.710658	0.794877	0	-0.0165222	0.766819	0.884217	0	93.8583	86.8618	91.6101	85.3678	86.6165	90.9842	91.5405	90.2347	84.1692	17.5436	16.2358	17.1234	15.9566	16.19	17.0064	17.1104	16.8663	15.7326
ENSG00000167524.14_5	protein_coding	RSKR	0.649831	0.0172818	0.0467029	1	0.0966	0.714198	0.852488	0	11.4474	5.69749	6.76897	10.1885	6.01278	3.14682	6.64174	7.6241	8.34736	2.45495	1.22185	1.45163	2.18496	1.28947	0.674849	1.42435	1.63502	1.79013
ENSG00000124570.20_5	protein_coding	SERPINB6	0.307328	1.18021e-05	0.000113544	0	0.153975	0.00812446	0.0457985	0	102.444	89.8605	81.8892	103.994	93.5501	83.0943	100.781	92.8886	83.3246	7.76031	6.8071	6.20326	7.87776	7.08659	6.29455	7.63436	7.03648	6.31199
ENSG00000135900.4_3	protein_coding	MRPL44	-0.265439	0.000237008	0.00140117	0	0.0214893	0.713539	0.851775	0	52.6793	64.2717	63.1091	50.6282	62.8362	66.4937	54.52	65.2874	59.9221	31.1897	38.0531	37.3648	29.9753	37.2032	39.3687	32.2795	38.6545	35.4779
ENSG00000138036.18_3	protein_coding	DYNC2LI1	-0.290778	0.0103671	0.0310841	0	-0.0371309	0.71333	0.851711	0	8.37358	11.0951	10.0771	10.368	11.2672	11.9488	9.35619	11.2431	12.4217	1.81325	2.40258	2.18214	2.24513	2.43984	2.58744	2.02603	2.43463	2.68984
ENSG00000197157.11_6	protein_coding	SND1	-0.180486	0.0051768	0.0178169	0	-0.0212359	0.712226	0.851191	0	134.666	152.583	156.755	126.885	144.198	152.188	137.917	149.104	143.595	20.7626	23.525	24.1682	19.5629	22.2322	23.464	21.2638	22.9886	22.1391
ENSG00000236008.3_6	lncRNA	LINC01814	-0.203564	0.556393	0.672358	0	0.583706	0.0715717	0.211867	0	0.529973	1.14949	0.45805	0.673248	0.920876	0.638485	0.693051	1.20635	1.09311	0.0391934	0.0850092	0.0338744	0.0497891	0.068102	0.0472183	0.0512536	0.0892136	0.0808392
ENSG00000235092.6_6	lncRNA	ID2-AS1	0.0919092	0.774247	0.842367	0	-0.0748587	0.818486	0.911072	0	1.00695	0.99956	1.52683	1.30161	1.02921	0.82091	1.32835	1.20635	1.09311	0.142144	0.141101	0.215533	0.18374	0.145287	0.115882	0.187514	0.170292	0.154306
ENSG00000179387.10_6	protein_coding	ELMOD2	-0.3149	0.00243964	0.00958257	0	0.0329786	0.711962	0.850999	0	28.5656	35.1845	37.3056	31.3285	39.1101	36.8497	28.5884	38.5066	36.0725	4.317	5.31729	5.63785	4.73454	5.91055	5.56895	4.32044	5.81934	5.45149
ENSG00000151014.6_3	protein_coding	NOCT	-0.391573	0.000209948	0.00126874	0	-0.0310921	0.712006	0.850999	0	19.026	28.4875	26.4142	20.6911	24.5928	27.6829	21.7156	25.7193	26.4333	7.57406	11.3406	10.5152	8.23692	9.79013	11.0203	8.64475	10.2386	10.5228
ENSG00000049618.23_6	protein_coding	ARID1B	-0.211353	0.00398153	0.0143752	0	-0.0239468	0.711329	0.850683	0	55.9122	65.6211	67.995	55.2063	59.5861	59.3791	54.289	63.116	64.2449	1.25148	1.46879	1.52192	1.23568	1.33371	1.32908	1.21514	1.41272	1.43799
ENSG00000137168.8_3	protein_coding	PPIL1	-0.175465	0.0173337	0.0468081	0	0.0250445	0.711086	0.85067	0	61.0529	74.3173	72.7282	62.612	72.4783	77.3023	67.5148	72.7668	65.6858	38.4222	46.7699	45.7698	39.4034	45.6125	48.6484	42.4888	45.7941	41.3378
ENSG00000139651.11_3	protein_coding	ZNF740	0.317899	7.77751e-06	7.97706e-05	0	0.0196756	0.710519	0.850137	0	76.4752	60.7733	60.5644	75.9872	64.4613	62.3892	77.1597	61.5236	61.214	8.44097	6.70787	6.68482	8.38711	7.11493	6.88622	8.51653	6.79069	6.75651
ENSG00000254473.1_6	lncRNA	AL354920.1	-0.923182	0.00504175	0.0174228	-1	-0.0985202	0.709832	0.849596	0	1.05995	1.44936	1.42505	0.583481	1.30006	1.82424	0.80856	1.54412	1.34154	0.934697	1.2781	1.25665	0.514534	1.14644	1.60868	0.713016	1.36166	1.18302
ENSG00000164258.12_4	protein_coding	NDUFS4	-0.480062	0.00593238	0.0197943	0	0.0555501	0.708895	0.848827	0	4.29278	6.44716	7.3288	4.93715	8.17954	7.20576	4.85136	5.88697	5.11773	3.65655	5.49162	6.24259	4.20541	6.96724	6.13779	4.13233	5.01445	4.35922
ENSG00000268812.3_6	lncRNA	AC004264.1	0.558244	0.0118606	0.0346199	0	0.0794215	0.708444	0.848369	0	3.60382	1.89916	1.93399	4.03949	2.70846	2.59955	3.17649	3.18475	2.83214	4.53881	2.39189	2.43576	5.08751	3.41116	3.27399	4.00061	4.01102	3.56693
ENSG00000134308.14_4	protein_coding	YWHAQ	0.0239312	0.656146	0.753948	0	0.0781556	0.156199	0.349645	0	416.082	445.854	412.805	427.871	452.204	442.06	431.54	426.323	399.58	154.047	165.07	152.834	158.412	167.421	163.665	159.77	157.839	147.938
ENSG00000266278.1_5	lncRNA	LINC01910	0.859105	0.00109091	0.00497721	1	-0.0970466	0.708163	0.848369	0	1.9609	0.899604	1.11968	2.01974	1.02921	0.912122	2.13691	1.20635	1.34154	0.743611	0.341147	0.424603	0.765925	0.390297	0.345894	0.810356	0.457469	0.508737
ENSG00000269973.1_6	lncRNA	AC010969.2	-0.0763663	0.648953	0.748282	0	0.120096	0.466784	0.678013	0	4.29278	5.24769	4.93676	3.7253	5.20024	3.92212	4.21606	3.57078	4.02462	1.32862	1.62417	1.52794	1.15299	1.60948	1.2139	1.30488	1.10516	1.24563
ENSG00000170390.16_5	protein_coding	DCLK2	-0.519595	0.0155632	0.0429266	0	0.0696315	0.707954	0.848331	0	2.33188	3.14861	3.20635	2.28904	2.8168	2.82758	1.79038	3.71554	3.22963	0.528053	0.713002	0.726076	0.518352	0.637861	0.640303	0.405431	0.841382	0.731348
ENSG00000124766.6_3	protein_coding	SOX4	0.182809	0.00218938	0.00879877	0	0.152446	0.00811677	0.045773	0	122.053	125.045	107.896	127.378	121.231	117.481	130.467	125.653	109.211	20.8566	21.3679	18.4375	21.7667	20.7161	20.0754	22.2944	21.4718	18.6622
ENSG00000205795.4_2	protein_coding	CYS1	-0.444971	0.0393451	0.0903261	0	0.308273	0.113938	0.286703	0	1.9609	3.34853	3.00277	2.78276	4.49604	3.78531	2.36793	4.24634	2.93151	0.688761	1.17616	1.05472	0.977435	1.57922	1.32958	0.831727	1.49151	1.02969
ENSG00000109084.14_4	protein_coding	TMEM97	-0.498131	4.19374e-08	9.26796e-07	0	-0.0209724	0.707367	0.848072	0	84.5837	114.8	113.596	85.0087	122.422	128.427	84.2057	116.147	116.366	28.878	39.1941	38.7834	29.0231	41.7966	43.8466	28.749	39.6541	39.729
ENSG00000172794.20_5	protein_coding	RAB37	0.259935	0.0187435	0.0498989	0	-0.0393085	0.707084	0.847996	0	14.1503	10.9952	12.4183	15.9784	13.2173	13.089	13.2835	11.2431	10.8317	2.78988	2.16782	2.44839	3.15032	2.60593	2.58063	2.61898	2.21671	2.13559
ENSG00000115756.13_4	protein_coding	HPCAL1	-0.0765108	0.304022	0.435814	0	-0.133293	0.0818697	0.230982	0	103.557	96.8574	102.451	91.6963	89.8666	104.073	90.8475	88.3045	95.1003	16.6036	15.5295	16.4263	14.702	14.4086	16.6864	14.5659	14.1582	15.2478
ENSG00000114270.17_3	protein_coding	COL7A1	0.950606	3.11645e-06	3.60076e-05	1	0.0586318	0.706554	0.84767	0	21.0399	8.49626	11.2477	22.7558	12.8923	8.34592	18.4814	12.3047	12.8192	1.90046	0.767434	1.01596	2.05544	1.16451	0.753854	1.66935	1.11144	1.1579
ENSG00000257135.7_7	lncRNA	ODC1-DT	0.23668	0.20046	0.320536	0	0.125513	0.493928	0.699559	0	3.76281	2.79877	3.81709	4.17414	4.00852	2.64515	3.69627	4.00507	3.47807	0.80128	0.59599	0.812838	0.888871	0.853603	0.563278	0.787111	0.852868	0.740645
ENSG00000115761.16_3	protein_coding	NOL10	-0.0325827	0.628985	0.732125	0	-0.109266	0.116971	0.291338	0	64.3918	64.2218	62.8038	66.2925	64.5696	73.0154	69.5362	61.0411	68.8161	16.7862	16.7419	16.3722	17.2817	16.8325	19.0342	18.1273	15.9127	17.9395
ENSG00000162636.16_3	protein_coding	FAM102B	-0.382947	0.000486263	0.00255824	0	0.0339862	0.70569	0.847095	0	31.5334	47.3292	44.4818	33.7522	42.9561	44.1467	34.9413	43.4767	42.0349	3.37256	5.06194	4.75741	3.60986	4.59424	4.72157	3.73704	4.64991	4.49571
ENSG00000134684.10_2	protein_coding	YARS	-0.310722	3.46507e-06	3.9227e-05	0	0.018162	0.705798	0.847095	0	304.788	386.58	374.329	292.055	381.351	381.86	306.155	366.198	363.707	37.1149	47.075	45.5832	35.5644	46.4382	46.5002	37.2815	44.5931	44.2896
ENSG00000196715.7_5	protein_coding	VKORC1L1	-0.145096	0.0121621	0.0353	0	0.0199188	0.705564	0.847088	0	81.3509	94.4584	95.9361	90.3947	98.8045	95.2255	85.4763	95.3013	93.411	13.3537	15.5053	15.7479	14.8383	16.2187	15.6312	14.0309	15.6437	15.3334
ENSG00000150873.11_2	protein_coding	C2orf50	-0.793802	0.0435105	0.0976668	0	0.0773685	0.814002	0.909637	0	0.847957	0.799648	1.17057	0.359065	0.812537	0.684092	0.40428	1.30285	0.944047	0.288617	0.272174	0.398425	0.122214	0.276561	0.232843	0.137604	0.443449	0.321323
ENSG00000162976.13_3	protein_coding	PQLC3	-0.200586	0.0675629	0.138141	0	0.237206	0.028332	0.112976	0	13.4083	16.8426	13.8942	10.5475	15.6007	15.7341	12.937	17.2749	12.521	5.90415	7.41638	6.11809	4.64445	6.86954	6.92827	5.69659	7.60672	5.51345
ENSG00000235034.6_3	protein_coding	C19orf81	0.813355	0.00128379	0.00570746	1	0.645508	0.00811128	0.0457599	1	2.64987	2.09908	1.78131	2.37881	2.92513	1.27697	2.71445	1.8819	1.34154	2.98408	2.36383	2.00598	2.67884	3.29407	1.43803	3.05681	2.11926	1.51074
ENSG00000169016.17_4	protein_coding	E2F6	-0.14387	0.0357947	0.0837067	0	-0.112232	0.0927641	0.250877	0	27.9296	30.8364	31.8599	29.3985	28.8722	33.11	30.2055	29.7244	31.7001	6.86737	7.58211	7.83377	7.22854	7.09913	8.14114	7.42697	7.30867	7.79447
ENSG00000070770.9_4	protein_coding	CSNK2A2	-0.27087	0.000259865	0.00151397	0	-0.0229174	0.70475	0.846885	0	63.0668	78.4155	83.416	68.8059	81.6871	79.309	70.8067	80.5839	81.834	8.89393	11.0585	11.7637	9.70327	11.5198	11.1845	9.98544	11.3642	11.5405
ENSG00000135924.15_3	protein_coding	DNAJB2	0.0371014	0.700113	0.786948	0	0.27778	0.00810706	0.045754	0	36.7272	38.0333	32.4707	29.8024	39.1643	32.1523	28.8771	35.5631	28.3214	6.23975	6.46165	5.51659	5.06327	6.65381	5.4625	4.90607	6.04198	4.81166
ENSG00000120742.11_3	protein_coding	SERP1	-0.150753	0.0124285	0.0358712	0	0.0208732	0.704615	0.846872	0	141.821	166.627	154.21	138.061	160.395	163.908	143.346	149.635	151.594	24.6946	29.0139	26.8519	24.0398	27.9288	28.5405	24.9601	26.0552	26.3963
ENSG00000151779.13_4	protein_coding	NBAS	0.0918655	0.188882	0.306368	0	-0.00902637	0.895126	0.94989	0	43.7758	47.2292	43.5148	48.6085	41.2227	42.9153	48.2826	42.7046	45.6124	4.89279	5.27878	4.86362	5.43294	4.60744	4.79662	5.39651	4.77307	5.09806
ENSG00000096092.6_3	protein_coding	TMEM14A	-0.299675	0.00011769	0.000779331	0	-0.0233631	0.704613	0.846872	0	36.3032	46.0797	43.1585	35.1435	43.4978	46.5638	36.7895	41.45	43.3765	36.7441	46.6394	43.6827	35.5704	44.0261	47.1294	37.2363	41.9535	43.9033
ENSG00000204842.16_7	protein_coding	ATXN2	-0.14587	0.048549	0.10654	0	-0.205386	0.00806865	0.045555	0	56.0712	52.4269	58.6304	56.2835	50.594	56.1411	49.2644	52.2106	64.2946	3.39743	3.17662	3.5525	3.4103	3.06556	3.40167	2.985	3.16351	3.8957
ENSG00000144355.15_3	protein_coding	DLX1	0.965482	2.1012e-06	2.56535e-05	1	0.0594203	0.704411	0.84683	0	6.99565	3.94826	3.76619	6.23876	3.90018	3.10122	7.39255	3.1365	3.67681	1.95957	1.10596	1.05496	1.74755	1.09249	0.868688	2.07074	0.878571	1.02992
ENSG00000112130.17_3	protein_coding	RNF8	-0.356783	3.65135e-05	0.000298204	0	-0.194291	0.00806738	0.045555	0	35.7202	42.4813	45.6014	38.2405	41.1144	49.209	35.7499	39.3269	45.7614	5.44183	6.47186	6.9472	5.82579	6.26362	7.4968	5.44636	5.9913	6.97158
ENSG00000178295.15_4	protein_coding	GEN1	0.107402	0.235535	0.361596	0	0.0711392	0.427267	0.64389	0	56.1242	49.2283	50.182	58.3481	57.4193	46.2446	51.0548	55.0094	57.4875	4.74342	4.16061	4.24121	4.93138	4.85288	3.90843	4.31498	4.6492	4.85865
ENSG00000145425.10_4	protein_coding	RPS3A	0.166873	0.00935451	0.0286067	0	0.0222481	0.703292	0.845767	0	417.619	377.584	361.198	426.929	403.669	417.433	445.401	385.645	370.265	183.166	165.607	158.42	187.249	177.048	183.085	195.351	169.142	162.397
ENSG00000240857.2_4	protein_coding	RDH14	-0.198547	0.0478345	0.105261	0	0.0738878	0.429992	0.646242	0	14.3093	15.6431	14.1487	12.3878	17.7675	16.7374	13.9188	15.586	15.5519	9.02224	9.86325	8.92097	7.81069	11.2027	10.5532	8.77603	9.82723	9.80576
ENSG00000234859.5_5	lncRNA	AC003958.2	4.06431	7.45499e-07	1.06096e-05	1	0.361429	0.703044	0.845742	0	2.64987	0.349846	0.254472	1.79533	0	0	2.42568	0.144761	0.14906	0.651553	0.0860207	0.06257	0.441438	0	0	0.59643	0.0355942	0.0366511
ENSG00000183891.6_3	protein_coding	TTC32	0.258385	0.195483	0.31446	0	0.0348727	0.860828	0.933259	0	3.86881	2.84875	4.17335	4.93715	3.6835	2.9644	3.58077	4.14983	3.32901	1.93925	1.42794	2.0919	2.47476	1.84637	1.48591	1.79487	2.08011	1.66868
ENSG00000118965.14_3	protein_coding	WDR35	0.167089	0.0760357	0.151599	0	-0.0390117	0.668758	0.823185	0	31.6394	28.4875	31.6055	36.131	29.9014	28.5038	36.2697	31.7993	32.6442	4.0377	3.63546	4.03337	4.61089	3.8159	3.63755	4.6286	4.0581	4.16592
ENSG00000068697.7_3	protein_coding	LAPTM4A	0.114953	0.08271	0.161842	0	0.049045	0.443887	0.657887	0	126.24	117.598	109.372	118.94	117.114	122.772	118.223	112.48	103.299	81.6557	76.0662	70.7453	76.9343	75.7527	79.4124	76.4703	72.7553	66.8167
ENSG00000115884.11_3	protein_coding	SDC1	-0.149197	0.0234069	0.0594273	0	0.165409	0.0126722	0.0641657	0	97.3561	126.594	103.825	93.5814	119.551	113.742	103.38	119.669	108.565	26.9461	35.0386	28.7364	25.9013	33.0892	31.4812	28.6134	33.1219	30.0485
ENSG00000055917.15_5	protein_coding	PUM2	0.0143552	0.823099	0.879211	0	0.111097	0.0954606	0.255459	0	181.622	199.812	187.444	186.714	201.455	185.982	189.607	195.38	178.971	26.0278	28.6346	26.8622	26.7575	28.87	26.6526	27.1722	27.9994	25.648
ENSG00000198276.16_4	protein_coding	UCKL1	0.193834	0.0154099	0.0425771	0	-0.0283791	0.7023	0.845556	0	61.5299	49.8281	54.3044	60.8616	52.7066	51.2613	57.812	52.0176	52.0716	19.3187	15.6446	17.05	19.1088	16.5484	16.0946	18.1513	16.3321	16.349
ENSG00000118960.13_5	protein_coding	HS1BP3	-0.00392705	0.963719	0.975946	0	-0.215808	0.0218869	0.094368	0	24.5378	22.5401	22.2409	24.2818	20.0426	26.5428	25.4696	21.473	25.5886	1.6778	1.5412	1.52074	1.66029	1.37043	1.81489	1.74151	1.46824	1.74965
ENSG00000168071.22_4	protein_coding	CCDC88B	0.433669	0.00038705	0.00211332	0	0.0400606	0.701113	0.844766	0	18.3371	13.2942	12.1638	17.4147	12.4589	11.812	16.2867	13.8488	14.6079	2.19606	1.59211	1.45674	2.08559	1.49208	1.41461	1.9505	1.65854	1.74945
ENSG00000271270.7_6	lncRNA	TMCC1-AS1	0.81087	0.00367653	0.0134659	1	0.102948	0.700525	0.844274	0	2.22589	1.34941	1.06878	2.10951	1.78758	1.32258	2.25242	0.916823	1.34154	0.289001	0.175202	0.138767	0.273891	0.232093	0.171719	0.292446	0.119037	0.174181
ENSG00000119778.15_5	protein_coding	ATAD2B	0.0854332	0.479456	0.604255	0	-0.0887472	0.467353	0.678099	0	16.4292	14.2437	17.7113	18.3123	16.0882	15.0956	18.7124	17.0336	17.6388	1.56453	1.35642	1.68663	1.74387	1.53207	1.43754	1.78196	1.62209	1.67972
ENSG00000173960.14_4	protein_coding	UBXN2A	0.0482662	0.519631	0.641252	0	0.119364	0.119915	0.295508	0	36.1972	38.4331	36.6949	38.3302	44.0937	40.179	41.1788	39.0373	34.8801	5.29353	5.62052	5.36632	5.60548	6.44833	5.87584	6.02205	5.70888	5.10091
ENSG00000205639.11_7	protein_coding	MFSD2B	-0.11045	0.620868	0.725273	0	-0.315452	0.176675	0.377383	0	1.69591	1.24945	1.8322	1.61579	1.30006	1.73303	1.15509	1.35111	1.29185	0.375036	0.276305	0.405175	0.357319	0.287497	0.383245	0.255437	0.298785	0.285682
ENSG00000267342.1_7	lncRNA	AC087289.3	0.80349	0.0158094	0.0434728	1	0.128596	0.700358	0.844209	0	1.05995	0.699692	0.610734	1.12208	0.866707	0.592879	1.32835	0.6273	0.794987	0.746967	0.493088	0.430397	0.790754	0.610787	0.417815	0.936116	0.442072	0.560244
ENSG00000187535.14_4	protein_coding	IFT140	0.29785	0.000568038	0.00291721	0	0.0284495	0.69917	0.843548	0	40.119	31.5361	32.2162	39.6767	30.0097	30.2825	37.5403	35.7561	33.0416	4.93468	3.87898	3.96263	4.88029	3.69123	3.72478	4.6175	4.39804	4.06416
ENSG00000115128.7_3	protein_coding	SF3B6	0.00491612	0.939586	0.959244	0	0.0174502	0.787835	0.895569	0	76.8461	80.2147	77.4105	76.7951	82.1204	84.5537	85.2453	78.509	75.8716	68.3077	71.302	68.8093	68.2623	72.996	75.1589	75.7736	69.7858	67.4414
ENSG00000165376.10_3	protein_coding	CLDN2	0.897942	0.000344122	0.00191443	1	-0.0882094	0.699298	0.843548	0	3.07385	1.99912	2.39204	3.77019	2.00426	1.64182	4.56259	1.73714	2.08684	0.901421	0.586252	0.701478	1.10563	0.587759	0.481472	1.338	0.509425	0.611977
ENSG00000102781.14_4	protein_coding	KATNAL1	-1.15293	1.62204e-10	7.55084e-09	-1	-0.0330408	0.699325	0.843548	0	13.7263	31.4861	34.0993	15.4398	32.7182	31.2402	15.9402	33.8259	35.0291	1.67968	3.85293	4.1727	1.88936	4.00369	3.82283	1.95059	4.13925	4.28648
ENSG00000164169.13_3	protein_coding	PRMT9	0.298719	0.00654351	0.0213689	0	0.0389665	0.698795	0.84331	0	14.0973	12.0947	12.2656	16.6068	13.0006	13.6362	15.8824	13.8488	11.9745	3.56713	3.06039	3.10364	4.20212	3.28962	3.45046	4.01883	3.50426	3.02998
ENSG00000006015.17_5	protein_coding	REX1BD	0.254628	0.0141712	0.0398645	0	0.0372433	0.698663	0.843222	0	51.3544	41.2319	42.1406	45.7808	36.2933	38.3091	44.0088	43.7662	37.9109	15.2387	12.235	12.5046	13.5848	10.7695	11.3677	13.059	12.987	11.2495
ENSG00000184924.5_2	protein_coding	PTRHD1	-0.114444	0.338295	0.471731	0	0.178977	0.131508	0.313168	0	9.22154	9.94563	8.55027	7.89944	9.3171	9.7141	7.39255	10.7606	8.24799	4.8104	5.18812	4.46024	4.12073	4.86025	5.06734	3.85631	5.61325	4.30255
ENSG00000125354.23_5	protein_coding	2020-09-06	0.566383	1.63254e-05	0.000149	0	0.0396618	0.698547	0.843152	0	27.3996	21.0907	18.9327	27.6032	19.1759	22.8487	31.7649	19.8323	16.5954	4.38745	3.37722	3.03166	4.42004	3.0706	3.65871	5.08645	3.17571	2.65738
ENSG00000166897.15_4	protein_coding	ELFN2	-0.637001	9.33999e-09	2.63253e-07	-1	-0.188814	0.00805983	0.0455409	0	66.9886	88.3112	97.3611	57.0016	80.3329	94.0398	59.3714	81.356	93.6097	7.62014	10.0456	11.0751	6.48409	9.13808	10.6973	6.75366	9.25446	10.6484
ENSG00000271936.1_6	lncRNA	AC012073.1	0.00828318	0.954202	0.969247	0	-0.211512	0.161868	0.357386	0	5.61772	4.14818	5.39481	5.78993	4.76689	4.56061	4.33157	4.68062	5.81334	5.07014	3.74384	4.86897	5.22557	4.30224	4.11607	3.90936	4.22439	5.2467
ENSG00000115137.11_3	protein_coding	DNAJC27	-0.238769	0.137959	0.24094	0	-0.0299694	0.844569	0.924415	0	5.67071	5.69749	5.4966	5.25133	7.04199	6.52167	5.65992	6.41776	7.50269	1.00831	1.01307	0.977348	0.933736	1.25213	1.15961	1.00639	1.14114	1.33405
ENSG00000084710.14_3	protein_coding	EFR3B	0.254549	0.337623	0.470975	0	-0.201037	0.469547	0.680052	0	1.48393	1.04954	1.06878	2.24416	1.73341	1.505	1.73263	1.2546	2.03715	0.139427	0.098613	0.100421	0.210858	0.162869	0.141408	0.162795	0.11788	0.191408
ENSG00000119772.16_3	protein_coding	DNMT3A	0.00762605	0.930927	0.953304	0	-0.226085	0.0190342	0.0853318	0	25.1207	19.2415	25.091	24.2818	20.6926	21.0244	24.0258	22.4863	27.0296	2.08991	1.60079	2.08744	2.02012	1.72152	1.74912	1.99882	1.87074	2.24872
ENSG00000138101.18_4	protein_coding	DTNB	0.145891	0.207165	0.328708	0	0.0925447	0.418837	0.636705	0	7.31363	7.14686	6.92165	7.80967	7.96287	6.7497	7.4503	6.70728	6.75739	1.02346	1.00012	0.968605	1.09287	1.11431	0.944543	1.04258	0.938607	0.945618
ENSG00000143970.16_3	protein_coding	ASXL2	0.150557	0.161227	0.271871	0	0.0743883	0.480285	0.688507	0	90.2545	94.3585	86.2661	98.2942	87.0498	75.9342	97.2582	89.7039	95.4481	6.93039	7.24553	6.62414	7.54774	6.68432	5.83077	7.46819	6.88811	7.3292
ENSG00000185129.6_4	protein_coding	PURA	0.185332	0.0129681	0.0371535	0	0.199806	0.00805616	0.045538	0	42.6629	42.6812	39.3414	45.736	46.4771	36.6217	43.951	44.6348	40.5443	3.4674	3.46889	3.19745	3.71716	3.7774	2.97641	3.57209	3.62767	3.29522
ENSG00000085840.13_3	protein_coding	ORC1	-0.10166	0.0902503	0.173215	0	-0.169153	0.00804775	0.0455142	0	67.8366	70.0692	75.5274	69.928	66.3572	79.0354	74.6185	66.156	73.1885	21.7355	22.4509	24.1997	22.4056	21.2615	25.3237	23.9085	21.1971	23.4503
ENSG00000285967.1_2	lncRNA	NIPBL-DT	0.549859	0.00372322	0.0136094	0	0.0677813	0.698439	0.843092	0	6.88965	3.94826	4.17335	7.22619	4.76689	5.29031	7.50806	6.70728	5.26679	0.992889	0.568996	0.601433	1.04139	0.68697	0.762402	1.08201	0.966606	0.759013
ENSG00000132429.10_3	protein_coding	POPDC3	0.481758	0.000169805	0.00105532	0	0.0418618	0.697211	0.842174	0	13.1963	11.5949	9.36458	13.9587	9.3171	10.763	14.4963	9.74727	9.63922	5.78787	5.08548	4.10727	6.12222	4.08645	4.72063	6.35804	4.27512	4.22773
ENSG00000138029.14_4	protein_coding	HADHB	0.0300821	0.581399	0.691574	0	0.0300813	0.581078	0.763286	0	90.5724	92.6592	89.4216	88.2403	88.5124	92.3068	96.1609	93.6124	87.3989	21.1766	21.6645	20.9076	20.6314	20.695	21.5821	22.4833	21.8874	20.4346
ENSG00000138018.18_6	protein_coding	SELENOI	-0.0809172	0.254294	0.382461	0	0.15969	0.0314354	0.121621	0	177.965	219.004	199.303	196.14	229.081	197.429	192.437	221.389	202.573	20.8098	25.6085	23.3048	22.9349	26.7869	23.0857	22.502	25.8873	23.6872
ENSG00000173557.15_3	protein_coding	C2orf70	-0.276876	0.0486301	0.106686	0	0.300921	0.0256759	0.105564	0	4.39878	6.49714	5.70018	4.39855	6.39196	4.60622	4.0428	6.32125	5.31648	1.7567	2.59471	2.27643	1.75661	2.5527	1.83954	1.61454	2.52446	2.12319
ENSG00000171303.7_3	protein_coding	KCNK3	0.248467	0.447585	0.57565	0	-0.46709	0.198026	0.403994	0	1.32493	0.549758	0.661628	1.66068	0.758368	1.36818	0.866314	1.06158	1.24217	0.212909	0.0883429	0.10632	0.266861	0.121865	0.219859	0.139212	0.17059	0.199609
ENSG00000213699.9_4	protein_coding	SLC35F6	0.0696514	0.220194	0.344308	0	0.0506161	0.36812	0.590391	0	103.981	103.704	95.5289	96.6784	94.8502	98.1443	100.954	98.9686	93.6097	26.6481	26.5772	24.482	24.7766	24.3081	25.1523	25.8725	25.3636	23.9902
ENSG00000115163.15_4	protein_coding	CENPA	0.140594	0.147869	0.254369	0	0.163101	0.0954685	0.255459	0	28.3006	28.9872	24.6838	27.0646	32.4473	28.8687	32.0536	27.2634	25.4893	14.5206	14.8729	12.6649	13.8864	16.6482	14.812	16.4462	13.9884	13.0781
ENSG00000157851.17_3	protein_coding	DPYSL5	-0.01319	0.882317	0.92026	0	0.14421	0.114056	0.286949	0	23.0538	24.6891	25.4981	23.2944	26.4345	22.6206	21.7156	24.899	20.6697	3.27098	3.503	3.61778	3.3051	3.75065	3.20951	3.0811	3.53277	2.9327
ENSG00000084764.11_5	protein_coding	MAPRE3	-0.0805378	0.44798	0.576032	0	-0.0737277	0.485613	0.692683	0	9.48652	9.04602	10.2298	10.0987	9.85879	9.85092	9.99149	10.8089	11.2292	2.61337	2.49202	2.81812	2.78202	2.71592	2.71375	2.75248	2.97765	3.09344
ENSG00000119777.20_5	protein_coding	TMEM214	-0.114459	0.0698551	0.141783	0	-0.0438922	0.468633	0.679205	0	105.2	109.402	109.932	96.9477	101.025	106.718	96.1031	102.732	106.23	21.43	22.286	22.394	19.749	20.5796	21.7393	19.5769	20.9274	21.6399
ENSG00000130758.8_4	protein_coding	MAP3K10	0.170528	0.127756	0.227751	0	0.31364	0.00804581	0.0455142	0	15.5282	15.7931	12.6218	11.9838	13.434	11.6752	13.4567	15.8273	12.0242	3.17941	3.23363	2.58432	2.45369	2.7506	2.39049	2.75527	3.24063	2.46195
ENSG00000228474.6_3	protein_coding	OST4	0.062521	0.361631	0.494476	0	0.055118	0.419726	0.637251	0	57.7141	56.9749	57.8161	54.937	59.3152	54.0432	57.2922	52.7897	50.8295	96.1902	94.9582	96.3602	91.5617	98.8587	90.0721	95.4871	87.9828	84.7158
ENSG00000138080.13_2	protein_coding	EMILIN1	-0.06223	0.843271	0.893583	0	0.412659	0.119074	0.294441	0	0.847957	1.09952	0.916101	1.0772	1.24589	0.82091	0.693051	1.35111	1.04342	0.214239	0.277796	0.231455	0.272157	0.314778	0.207405	0.175101	0.341361	0.263623
ENSG00000138030.13_4	protein_coding	KHK	-0.236014	0.04675	0.103299	0	-0.0030732	0.977657	0.990616	0	8.47957	8.89609	9.16101	7.94432	10.7255	10.1246	8.0856	9.21648	9.53984	2.78019	2.91675	3.00361	2.6047	3.51656	3.31953	2.65102	3.0218	3.12782
ENSG00000067798.16_5	protein_coding	NAV3	-0.77746	4.22674e-07	6.52365e-06	-1	0.038018	0.696984	0.842041	0	14.9982	23.8395	26.058	15.9335	28.1138	23.0311	14.6118	28.3733	29.2158	1.12956	1.79541	1.96249	1.19999	2.11732	1.73453	1.10045	2.13686	2.20031
ENSG00000158865.12_3	protein_coding	SLC5A11	2.74687	3.76894e-07	5.91191e-06	1	-0.202753	0.696122	0.841684	0	3.76281	0.649714	0.407156	3.09694	0.325015	0.319243	3.06098	0.289523	0.7453	1.10185	0.190253	0.119226	0.906864	0.0951728	0.0934825	0.896333	0.0847798	0.218243
ENSG00000100023.19_4	protein_coding	PPIL2	-0.0861601	0.143746	0.248639	0	-0.167964	0.00804881	0.0455142	0	68.4196	60.5734	73.1354	65.7987	62.132	69.0476	65.5511	66.0112	69.9092	8.92157	7.89847	9.53649	8.57983	8.10171	9.00347	8.54754	8.60754	9.11581
ENSG00000138085.16_7	protein_coding	ATRAID	0.0514611	0.440818	0.569766	0	0.072478	0.280686	0.502865	0	62.0599	62.4725	59.5974	61.849	65.003	64.5326	63.703	62.8747	56.7919	30.7379	30.9423	29.5183	30.6335	32.1956	31.9627	31.5517	31.1415	28.1287
ENSG00000084774.14_5	protein_coding	CAD	0.0602819	0.386447	0.517992	0	0.0216314	0.753818	0.876167	0	304.364	305.965	304.196	319.164	278.375	255.713	291.89	306.943	318.343	36.0492	36.2389	36.0294	37.8022	32.9711	30.287	34.5719	36.3547	37.7049
ENSG00000115194.10_5	protein_coding	SLC30A3	0.0290379	0.739774	0.81737	0	-0.236786	0.0142363	0.0696805	0	25.8097	18.6918	25.3454	28.1866	23.1844	24.4905	24.5456	23.5961	27.3277	4.31745	3.12676	4.23979	4.71506	3.87829	4.09677	4.10598	3.94716	4.57137
ENSG00000163793.12_2	protein_coding	DNAJC5G	0.436293	0.154602	0.263584	0	-0.465663	0.169305	0.367626	0	2.11989	0.899604	1.8322	2.55834	0.758368	1.00333	1.3861	1.59238	1.73903	0.902082	0.38281	0.77966	1.08866	0.32271	0.426951	0.589831	0.677607	0.740014
ENSG00000138100.13_2	protein_coding	TRIM54	0.27558	0.324833	0.457656	0	-0.600092	0.0621496	0.192381	0	1.74891	0.849626	1.47594	1.84021	1.13755	1.18576	1.32835	0.723807	1.44091	0.632747	0.30739	0.533987	0.665778	0.41156	0.429001	0.480589	0.26187	0.521315
ENSG00000163794.6_2	protein_coding	UCN	0.234596	0.347503	0.480761	0	0.32135	0.197598	0.403614	0	1.11294	1.29943	1.11968	1.70556	1.4084	1.04894	1.3861	1.78539	1.44091	1.39993	1.6345	1.4084	2.14536	1.77157	1.31942	1.74353	2.24578	1.81247
ENSG00000115204.15_4	protein_coding	MPV17	-0.183418	0.0541767	0.116187	0	-0.214118	0.027232	0.109864	0	18.5491	16.9925	21.0194	20.6911	18.5259	20.0211	16.9798	19.6876	23.0546	3.2982	3.02143	3.73745	3.67908	3.29407	3.55994	3.01916	3.50063	4.09933
ENSG00000115207.13_4	protein_coding	GTF3C2	-0.0121108	0.821673	0.877831	0	-0.150347	0.0109478	0.0575337	0	94.2823	91.8096	94.3075	95.4216	83.9622	97.0498	98.3555	85.8918	99.0752	16.147	15.7235	16.1513	16.3421	14.3796	16.621	16.8446	14.71	16.9678
ENSG00000163935.14_4	protein_coding	SFMBT1	-0.340888	0.000159847	0.00100631	0	-0.0281242	0.695991	0.841616	0	33.0173	40.1823	42.904	32.0466	38.9476	40.7719	33.844	43.5732	41.5381	5.81189	7.07311	7.5522	5.64101	6.85577	7.17688	5.9574	7.66999	7.31175
ENSG00000115211.15_4	protein_coding	EIF2B4	0.0713123	0.294285	0.425704	0	0.00241799	0.971234	0.987953	0	69.6915	61.8728	60.2082	63.7341	60.1819	61.7051	59.0249	61.4754	61.3134	13.0484	11.5845	11.2728	11.933	11.2679	11.5531	11.0513	11.5101	11.4798
ENSG00000111206.12_4	protein_coding	FOXM1	0.119768	0.0159454	0.0437489	0	0.017941	0.695652	0.841447	0	209.975	199.212	197.013	208.438	193.763	192.23	213.806	196.104	192.586	42.8609	40.6639	40.2148	42.5469	39.5516	39.2386	43.6429	40.0293	39.3112
ENSG00000126945.9_4	protein_coding	HNRNPH2	0.170179	0.00524969	0.0179991	0	-0.0214671	0.695419	0.841447	0	89.2475	81.1643	82.958	94.883	86.1831	85.1922	97.2582	79.088	81.8837	38.8709	35.3503	36.1315	41.3254	37.5362	37.1046	42.3598	34.446	35.6636
ENSG00000131871.15_5	protein_coding	SELENOS	-0.350292	5.29822e-05	0.000404971	0	0.0261774	0.695526	0.841447	0	43.9348	61.6729	56.0857	43.6265	57.636	62.3892	47.5318	55.9262	53.5126	11.691	16.4111	14.9244	11.609	15.3369	16.6017	12.6482	14.8819	14.2396
ENSG00000213453.3_4	processed_pseudogene	FTH1P3	-0.102317	0.752711	0.826646	0	-0.104443	0.746858	0.872352	0	0.900955	0.949582	0.763417	0.493715	0.65003	1.14015	1.15509	0.868569	0.7453	1.54273	1.626	1.30722	0.845402	1.11306	1.95232	1.97789	1.48728	1.2762
ENSG00000115216.14_4	protein_coding	NRBP1	0.120296	0.0357726	0.083671	0	0.0437732	0.420541	0.638017	0	144.895	141.638	130.341	140.529	136.506	139.007	150.103	134.773	131.173	27.1898	26.5787	24.4588	26.3707	25.6157	26.0851	28.1673	25.2905	24.6149
ENSG00000157992.12_3	protein_coding	KRTCAP3	0.0794421	0.342612	0.476002	0	0.0375907	0.650405	0.810605	0	33.3353	32.2358	28.5518	29.578	28.7097	31.605	31.3606	30.4964	28.9176	23.76	22.9764	20.3505	21.082	20.463	22.5267	22.3525	21.7366	20.6113
ENSG00000286122.1_2	lncRNA	AC016074.2	1.76467	1.76993e-08	4.46537e-07	1	0.0863611	0.695596	0.841447	0	8.10859	1.84919	2.34115	7.71991	2.76263	1.77864	8.0856	2.84698	2.93151	2.1288	0.485478	0.614635	2.02675	0.725289	0.466957	2.12276	0.747434	0.769628
ENSG00000115226.10_3	protein_coding	FNDC4	-0.557052	0.0482036	0.105895	0	0.465963	0.0599067	0.187815	0	1.05995	1.69925	1.32326	0.763014	1.95009	1.55061	1.03958	2.12317	1.29185	0.54721	0.87726	0.683147	0.393915	1.00676	0.80052	0.536694	1.09611	0.666935
ENSG00000150779.11_4	protein_coding	TIMM8B	-0.219448	0.00847699	0.026393	0	0.0291309	0.695239	0.841412	0	21.7819	26.3884	24.8365	23.5637	27.1929	28.3214	23.1595	27.8425	26.5824	18.6809	22.6316	21.3006	20.209	23.3215	24.2894	19.8623	23.8786	22.7979
ENSG00000099139.13_4	protein_coding	PCSK5	0.762186	1.48638e-05	0.000138477	1	0.0552158	0.693993	0.84068	0	10.9704	7.0469	6.81986	12.6571	7.09616	5.47273	11.3776	7.33458	8.44674	0.863475	0.554656	0.536785	0.996227	0.558533	0.430754	0.895521	0.577299	0.664836
ENSG00000176714.9_3	protein_coding	CCDC121	-0.405016	0.0549897	0.117537	0	-0.146675	0.454143	0.666314	0	2.33188	2.84875	3.20635	2.01974	3.14181	3.37485	3.06098	2.79872	3.13026	0.819931	1.00167	1.12741	0.710177	1.10472	1.18666	1.07629	0.984079	1.10065
ENSG00000198522.13_4	protein_coding	GPN1	-0.145938	0.0430609	0.0968989	0	-0.107534	0.125421	0.303735	0	48.8635	52.5269	53.4392	51.3464	55.8484	61.249	52.2676	48.3021	53.9101	13.0442	14.0221	14.2657	13.707	14.9088	16.3505	13.9529	12.8943	14.3914
ENSG00000119760.16_3	protein_coding	SUPT7L	0.0320392	0.622532	0.726353	0	0.0319459	0.623162	0.791972	0	49.7645	45.7799	49.3167	50.0447	51.8399	47.2023	50.3617	52.5484	50.3823	9.36832	8.6182	9.28403	9.42107	9.75901	8.88598	9.48075	9.8924	9.48462
ENSG00000163798.13_4	protein_coding	SLC4A1AP	-0.103984	0.0788639	0.155966	0	-0.0858275	0.140837	0.327314	0	45.1007	45.48	47.9935	44.8832	45.3396	49.8019	46.6655	47.4818	48.9911	8.66156	8.73439	9.21711	8.61978	8.70743	9.56441	8.96206	9.11883	9.40869
ENSG00000243147.8_4	protein_coding	MRPL33	0.117569	0.132865	0.233968	0	0.0693324	0.366211	0.588704	0	31.2684	30.9864	30.9438	34.6498	35.86	32.882	38.0601	33.6812	31.8989	20.4102	20.2261	20.1983	22.6174	23.4073	21.4634	24.8434	21.9851	20.8217
ENSG00000153933.10_3	protein_coding	DGKE	0.294632	0.0104129	0.031189	0	0.0420696	0.69386	0.84066	0	9.38053	7.09688	7.83775	8.97664	7.58368	6.97773	8.48988	7.86537	7.1052	0.85863	0.6496	0.717414	0.82166	0.694159	0.638694	0.777106	0.719943	0.650361
[truncated: 12,839 more rows]
