# Supplementary material for: Global and context-specific transcriptional consequences of oncogenic Fbw7 mutations
Source: eLife. 2022 Feb 28;11:e74338. doi: 10.7554/eLife.74338 (PMC8926403; doi:10.7554/eLife.74338)
Supplement: Figure 1—source data 2. — This Excel file includes genes that belong to each cluster in the hierarchical cluster analysis. [file elife-74338-fig1-data2.xlsx]

## Sheet: Sheet1
Gene_name	Cluster #	Gene_name	Cluster #	Gene_name	Cluster #	Gene_name	Cluster #	Gene_name	Cluster #	Gene_name	Cluster #
KCNQ5	1	GOLGA7B	2	BEND6	3	FADS2	4	CBWD3	5	DRAXIN	6
FGF13	1	ZDHHC17	2	EDNRA	3	SHLD3	4	SPTSSB	5	DEGS2	6
MPZ	1	FOXP1	2	SYNE1	3	C19orf81	4	ACTL8	5	KLK1	6
CARNS1	1	PHLDA1	2	PIP4P2	3	PLAC8	4	ITGB1BP2	5	MGAM2	6
ZCCHC12	1	SHROOM3	2	P2RX7	3	KLHL35	4	SULT1A2	5	ATOH8	6
MRVI1	1	DES	2	DUSP16	3	APLP1	4	KLK13	5	ZNF546	6
ASIC3	1	RTN4RL1	2	CGNL1	3	NWD2	4	MYRIP	5	CCSER1	6
FAM122A	1	ZNF440	2	EIF4E3	3	NUDT8	4	GPR19	5	TMEM74B	6
KRT35	1	INSYN1	2	ARHGAP31	3	NINJ1	4	TRPV2	5	LURAP1L	6
SAMD12	1	ATP6V1C2	2	HPCAL4	3	ADRB2	4	GPRIN3	5	MYLK4	6
LRP1	1	ZNF320	2	ELFN2	3	LRG1	4	AC008687.4	5	CA12	6
TNFRSF13C	1	TSPAN14	2	SQOR	3	PTGES3L	4	HOMER2	5	AMN	6
OR51I1	1	SMAD7	2	CYP4F3	3	SMIM29	4	SPACA6	5	KCNB1	6
DTX1	1	NAB1	2	UFSP2	3	SHC3	4	S100A5	5	PLSCR4	6
IFIT2	1	C11orf74	2	TGFBR3	3	AP003071.5	4	PRRT2	5	PLEKHG4B	6
KLK11	1	C7orf31	2	ZNF573	3	SMTNL2	4	ARHGDIB	5	SRXN1	6
TTC30B	1	KLF8	2	DNAH6	3	INCA1	4	NREP	5	GBX2	6
ZNF747	1	DHCR24	2	KCNF1	3	YPEL3	4	GK	5	KLHDC7A	6
DOCK4	1	OSBPL8	2	METTL7A	3	SCARF1	4	CALCRL	5	LRRC37B	6
ALDH1L1	1	PTPRM	2	MGLL	3	ARSG	4	PTGS1	5	ACTA2	6
ACSBG1	1	CLSPN	2	PROS1	3	GPR179	4	TNNC1	5	CD96	6
F8	1	GLT8D2	2	EPHA4	3	MN1	4	BCL11B	5	RNF165	6
SERINC5	1	SERPING1	2	WNT6	3	FGF18	4	NR4A1	5	ZNF416	6
CASTOR3	1	KANK1	2	PSD2	3	MT1F	4	CA8	5	ZNF396	6
AC009779.3	1	FAAH2	2	PREX1	3	YBX2	4	DACT3	5	TMEM255B	6
UCP3	1	TMOD2	2	PIGH	3	LFNG	4	PAG1	5	ZNF365	6
PLA2G4D	1	PCDHAC1	2	ITGA9	3	PHYHIP	4	FBXO4	5	RGS20	6
TBCE	1	CHPF	2	INO80C	3	AC087289.1	4	NLRP11	5	GLI2	6
MYH3	1	FUT8	2	TMCC2	3	LMO2	4	CPVL	5	EBF4	6
SSC4D	1	PKIB	2	LNX1	3	FZD9	4	RNF152	5	SLCO1B3	6
UPP1	1	CRYBG1	2	TMCC3	3	RASIP1	4	EBF2	5	PRR15	6
LIN7B	1	REEP2	2	C1orf210	3	HHAT	4	LMCD1	5	PKDREJ	6
UPK3B	1	EMB	2	TTC9	3	AATK	4	CYP2J2	5	CSPG5	6
FAM184A	1	SH2D3A	2	CPLANE2	3	AMOTL2	4	ZFP36	5	FAM21B	6
SPDYC	1	EFNB2	2	NOVA2	3	CATSPERG	4	GABRE	5	FEZ1	6
BDKRB2	1	USP33	2	RNF223	3	RCBTB2	4	GASK1B	5	FMNL3	6
CMTM1	1	ABHD10	2	LGR4	3	WNT11	4	RAB3A	5	SLC35F3	6
MAMSTR	1	ZNF567	2	TMEM121	3	ULK4	4	RASSF6	5	CCN2	6
RHBDL1	1	CORO2B	2	ZNF30	3	AL136295.5	4	GASK1A	5	BCL2	6
BST2	1	ZFP30	2	SYDE2	3	CNPY4	4	CYTH4	5	ST8SIA6	6
FLOT1	1	STARD13	2	FHDC1	3	INKA2	4	CDKN1C	5	SHANK2	6
FTL	1	RO60	2	PDX1	3	PSMB10	4	DUSP2	5	MACF1	6
FBXL8	1	FGD4	2	EXOC6	3	HIST1H3E	4	ZMAT1	5	ABCG1	6
ASPDH	1	TEAD2	2	RAPH1	3	UCN2	4	BCL11A	5	TMEM139	6
CYBB	1	ANXA9	2	OVOL1	3	FNDC10	4	CMPK2	5	PAQR8	6
SNN	1	PON3	2	GXYLT2	3	EPX	4	ARID5B	5	ANO10	6
NLRP6	1	KIAA1211	2	ACOXL	3	DCST2	4	HECTD2	5	SGK1	6
GCNT2	1	MAT1A	2	HRH1	3	ABHD14A	4	KAT2B	5	SRPX2	6
SLC39A1	1	HOXA13	2	KCND3	3	STPG4	4	CD163L1	5	UBE2F	6
HSF4	1	MYO10	2	2021-03-09	3	B4GAT1	4	FARS2	5	FSD1	6
EGFL7	1	SAMD9	2	MEGF9	3	MTMR7	4	ZNF780B	5	CRLS1	6
CCDC159	1	FAM83B	2	BTBD8	3	IFIT3	4	TTPA	5	MAGEB17	6
OPLAH	1	KATNAL1	2	NLRP1	3	FUZ	4	SNRNP35	5	NOTUM	6
CCDC78	1	NAV3	2	ATL1	3	NECTIN4	4	AP004243.1	5	PLCB1	6
MESP2	1	PLEK2	2	GVQW2	3	WNT7A	4	CSRNP3	5	FOXQ1	6
RASSF8	1	ADGRD2	2	IGF2	3	CAPS	4	PODXL2	5	SLC1A4	6
STKLD1	1	DLG4	2	ACOX2	3	SCNN1D	4	ABCA5	5	GRAMD2A	6
PPP1R3E	1	MACC1	2	TMEM125	3	PCOLCE	4	PIK3R3	5	FN1	6
SCART1	1	BMERB1	2	FGGY	3	NOXA1	4	ZNF680	5	MB21D2	6
RSKR	1	RAB15	2	TLR1	3	ZNF224	4	PLXNA2	5	EXO5	6
COL7A1	1	ZNF136	2	TRHDE	3	CD99L2	4	EGR2	5	WNT3A	6
DLX1	1	ZNF724	2	NRP2	3	KANK3	4	DNAH2	5	SOX8	6
CLDN2	1	TMC7	2	TCEA3	3	PLLP	4	NAV2	5	ARHGAP42	6
SLC5A11	1	BSPRY	2	MYOM2	3	SLC26A1	4	ANGPTL4	5	AL162171.1	6
PCSK5	1	RBM20	2	SLC7A8	3	HIST2H2BE	4	SEMA6A	5	SNPH	6
PDE2A	1	ZNF600	2	NYNRIN	3	SLC2A9	4	PRSS51	5	RIOX1	6
CATSPER1	1	INAVA	2	SYNPO2	3	RHEBL1	4	FOSB	5	NHSL1	6
MNS1	1	PCYT2	2	GPR39	3	SYCE1L	4	TASP1	5	PARP3	6
PRR15L	1	EPHX4	2	ANKRD22	3	C22orf23	4	SRD5A3	5	SIPA1L2	6
CXCL8	1	MEIS3	2	MAP4K1	3	ZNF217	4	MFSD14A	5	SLC52A3	6
S1PR5	1	IQCJ-SCHIP1	2	HOXA1	3	KLHDC8B	4	ZNF620	5	ANO4	6
NMB	1	TNS1	2	WNT10A	3	JAK3	4	HOXA3	5	FAM110A	6
SAMD15	1	ZNF701	2	JHY	3	ACER2	4	MYO7A	5	MSRB3	6
KLK6	1	ARHGAP26	2	IL12A	3	BEST3	4	RBBP8NL	5	DRD1	6
EPS8	1	PLEKHG2	2	FHOD3	3	ZEB1	4	EGR1	5	ZFAT	6
ZNF648	1	TLNRD1	2	KRCC1	3	FSTL3	4	RGS16	5	RAMP1	6
HCLS1	1	STAMBPL1	2	PHTF2	3	MYO15B	4	ARRDC4	5	CRPPA	6
ANKRD2	1	EIF2A	2	BAMBI	3	CCDC92	4	OVOL2	5	LAMA3	6
ATP8A1	1	LRP11	2	TMEM171	3	CDH22	4	SMAD6	5	ETS1	6
SLC47A1	1	IL4R	2	PAX9	3	HS6ST3	4	IER2	5	ATXN1	6
LURAP1	1	JAK2	2	PLS1	3	CNGA1	4	TLL1	5	IFI35	6
C2orf92	1	ARHGEF25	2	ANTXR2	3	PHLDB2	4	IL1R1	5	RASSF1	6
FAM83A	1	HDAC9	2	KLF10	3	PRRT1	4	HNF4A	5	TCN1	6
GPR155	1	TSPAN18	2	MXD1	3	CLIP3	4	EPG5	5	IRS2	6
KRT20	1	ADAMTS2	2	CACNA1G	3	PPP1R3F	4	BOP1	5	PTCHD4	6
FOXRED2	1	AKAP7	2	STYK1	3	AHNAK2	4	SATB1	5	FAS	6
HLA-DRB5	1	PKIA	2	FOXP2	3	SEMA3G	4	IFIH1	5	HES6	6
RBM34	1	RAET1E	2	GLCCI1	3	DUSP28	4	TRPV6	5	MAML2	6
TAS2R4	1	AC005747.1	2	FAM124A	3	FAM43A	4	DUSP1	5	MLPH	6
CD82	1	ZNF845	2	NR3C2	3	MT1X	4	LHFPL6	5	CRLF1	6
FHAD1	1	CNTNAP3	2	PITPNC1	3	KCNQ1	4	JAKMIP2	5	HYAL1	6
DDTL	1	TFPI	2	SLC45A4	3	PLPP6	4	GALNT14	5	ABLIM3	6
ADAMTS17	1	RHBDL3	2	PTGS2	3	TMEM80	4	SLX4IP	5	COL12A1	6
SPON1	1	TMEM117	2	TBC1D23	3	CYP1B1	4	ZNF467	5	MED10	6
ITGA1	1	CYP4F12	2	CMTM3	3	BTBD19	4	CASP10	5	COBL	6
ACADVL	1	RBPMS2	2	RGS17	3	ST5	4	ARID4A	5	TNIK	6
FAT2	1	CLIC3	2	NKX2-8	3	ABHD8	4	PLCL2	5	TRIB3	6
F2R	1	LARGE1	2	VEPH1	3	AC020909.1	4	SYT13	5	C20orf96	6
C2orf68	1	RAG1	2	CCDC153	3	ACAP1	4	SLC6A20	5	SHLD1	6
KIRREL2	1	C4orf33	2	TPK1	3	KRT86	4	RPP40	5	TMEM200A	6
SSC5D	1	CILP2	2	GABRG2	3	AC010605.1	4	PET117	5	TSPAN13	6
CXCR4	1	CAMK1	2	PLXDC1	3	GRPR	4	ITPKB	5	RBMS2	6
YJEFN3	1	NT5E	2	PWWP3B	3	AHRR	4	NDUFAF5	5	PCED1A	6
SH3TC1	1	FMO4	2	DUSP19	3	NATD1	4	SDR16C5	5	EMP1	6
ST6GALNAC3	1	CHERP	2	TRPM6	3	ERFE	4	KIF24	5	L1CAM	6
KLHDC7B	1	ARC	2	LYPD6B	3	SYDE1	4	RBBP9	5	TIPARP	6
C4orf47	1	TMEM198	2	FXR2	3	APOBEC3B	4	ZNF133	5	TNFSF18	6
NTF4	1	PRRG4	2	DYRK4	3	ANGPT4	4	FOS	5	SOX12	6
TTC30A	1	DMBX1	2	HNF4G	3	PARP10	4	PROM2	5	ZNF385A	6
BIRC3	1	GCOM1	2	SNCA	3	MYL2	4	RERG	5	HIST1H2AC	6
TGFB2	1	GLRX2	2	SLC15A1	3	CAMK1D	4	ZDHHC21	5	AGPAT5	6
CEL	1	SMAGP	2	TMEM45A	3	FUCA1	4	SPP1	5	NSFL1C	6
FAM228B	1	RGCC	2	ZNF708	3	SHROOM2	4	EMC3	5	MICAL2	6
DCT	1	TC2N	2	MRAP2	3	DDIT4L	4	KIF16B	5	FGF9	6
CHST15	1	CPEB4	2	FDXACB1	3	THEM6	4	NHLRC2	5	ULK2	6
ATAT1	1	CPM	2	PLA2G4A	3	HSPG2	4	MBNL3	5	INSIG1	6
RTTN	1	FOXC1	2	ST14	3	SYTL5	4	BFSP1	5	PRSS12	6
SOX6	1	ACSL1	2	SMIM30	3	RNPEPL1	4	MKKS	5	HDAC4	6
ALOX12	1	RUNDC3B	2	MMAA	3	SEMA7A	4	THRB	5	MSH6	6
SHC2	1	MYO6	2	NEDD4	3	DNAH3	4	TWIST1	5	ALDH1A3	6
NEDD9	1	GPD1	2	ALDH1L2	3	CLDN3	4	FAM49A	5	ZCCHC3	6
HLA-DPA1	1	IGF2BP2	2	TRABD2A	3	FRMD3	4	LYRM4	5	SESN1	6
BEGAIN	1	PALM3	2	CHRD	3	AC007906.2	4	NUBP2	5	PLCXD2	6
ADSSL1	1	CNTN1	2	CECR2	3	HACD1	4	FBXO8	5	TMX4	6
MUC4	1	CDA	2	C2CD4C	3	AC124319.1	4	SMIM26	5	LZTS3	6
DNAH12	1	SARDH	2	LTBP1	3	NFKBIA	4	KLF2	5	TSC22D1	6
EFNA5	1	FLVCR2	2	SLC4A8	3	LYNX1	4	METTL7B	5	SAMD4A	6
NRG2	1	CLCN4	2	SLC16A10	3	KCNMB4	4	EPN3	5	RBCK1	6
HLA-DOA	1	PTPRN2	2	SLC25A48	3	PRICKLE1	4	TTC37	5	MCM8	6
APOBEC3D	1	ANKIB1	2	SP110	3	ABCD1	4	ZFR	5	CSNK2A1	6
SCN2A	1	FIBCD1	2	CFL2	3	HEXD	4	ABCB10	5	MTUS1	6
EFHC1	1	CCNE2	2	RAB19	3	S100A3	4	TTC22	5	ZFP36L1	6
AC010327.1	1	GRID1	2	CDIP1	3	EVA1C	4	KRT23	5	PYCR2	6
AC099489.1	1	GNAQ	2	CLGN	3	TYMP	4	ISM1	5	HOXB4	6
CEP164	1	REEP1	2	CRYM	3	NWD1	4	FABP6	5	CAMK2D	6
SLC22A18AS	1	PARP8	2	PBX3	3	ABHD14B	4	TOP2B	5	TBC1D20	6
VMAC	1	CSRP2	2	SPIRE1	3	BVES	4	AC004156.1	5	CDK6	6
IZUMO4	1	TMEM158	2	RNASEL	3	NOTCH1	4	ARRDC3	5	UBE2H	6
ZNF488	1	STK17B	2	BMP6	3	BBC3	4	GPR15	5	COL9A3	6
TNFAIP2	1	LGALSL	2	VANGL2	3	PLPP3	4	NETO2	5	ANGPT2	6
SKIDA1	1	EXTL3	2	SMAD9	3	GRIN2B	4	TIMM9	5	F3	6
THBS1	1	GLI1	2	SLC16A7	3	HSD11B1L	4	DAPK1	5	FERMT1	6
ZC2HC1C	1	SLC9B2	2	BAZ2B	3	ARAP2	4	GTF3C4	5	PSMF1	6
NLRC5	1	FOXL1	2	ZNF860	3	EXD3	4	UACA	5	TM4SF18	6
HECW1	1	COBLL1	2	PKP2	3	SKAP1	4	BRMS1	5	SLC4A11	6
CLCN7	1	B3GNT5	2	ZNF239	3	SH2B3	4	RALGAPA2	5	UBOX5	6
SVEP1	1	CACNB4	2	PLEKHF2	3	ANKMY1	4	MAGI1	5	RINL	6
AKR1B10	1	ZNF44	2	CHMP2B	3	HYAL3	4	CMSS1	5	DAP	6
ADORA1	1	ARGLU1	2	PLCH2	3	FBLN1	4	GOT1	5	FGFBP1	6
IQCN	1	ZFP14	2	ARMC4	3	NUPR1	4	ERMP1	5	ITPA	6
DYSF	1	SERTAD4	2	FCGBP	3	CTNNAL1	4	DTD1	5	DDRGK1	6
IDUA	1	AC022137.3	2	PLPPR4	3	CDHR3	4	CSRNP1	5	FASTKD5	6
RBM47	1	RBP1	2	NAT1	3	EEF1AKMT3	4	BLM	5	FKBP1A	6
MLLT11	1	GFPT2	2	PPP1R1A	3	EDN1	4	HTR7	5	WNT16	6
FLT3	1	TUBA1A	2	RRAGD	3	SLC6A9	4	ZHX1	5	CDKN1A	6
MSLNL	1	P4HA3	2	BCO2	3	BTBD11	4	KLHL13	5	PTPRA	6
TFEB	1	CHST7	2	DDX60	3	SERPINF2	4	CCN3	5	GPCPD1	6
CFAP44	1	PPP2R5A	2	SH3BP5	3	SYTL3	4	ANKEF1	5	VSNL1	6
EID2B	1	ZC3H13	2	HERC6	3	EPS8L2	4	ESF1	5	MRPS26	6
PRSS22	1	PRR36	2	RADIL	3	ZNF280C	4	CA2	5	FBLIM1	6
AK5	1	LTK	2	CCDC68	3	MPP5	4	KAT14	5	AOPEP	6
ZNF33B	1	ARNTL2	2	OLFM1	3	PLD1	4	SAAL1	5	HOXB8	6
PEAR1	1	ACP7	2	NAP1L5	3	SYNM	4	OSMR	5	ZBED2	6
KCNH8	1	GAL	2	KLF15	3	KCNC4	4	POLR3F	5	COL13A1	6
ABCG2	1	EZR	2	ZNF85	3	MXD4	4	ARHGAP18	5	RNF43	6
CAMK2N1	1	C1QL4	2	SAT1	3	CCDC9B	4	DCLRE1A	5
ASPHD1	1	EHBP1	2	ARNT2	3	MTERF4	4	SCAMP2	5
RBKS	1	CCDC69	2	FAM229B	3	INPP5D	4	OFD1	5
EDA2R	1	AREG	2	PUDP	3	DDIT4	4	CAPN6	5
AQP11	1	NOSIP	2	ARL14EPL	3	D2HGDH	4	SLC9A1	5
CD226	1	FAR2	2	EEA1	3	PRX	4	SNRPB2	5
RAB24	1	KIAA0040	2	PCDH19	3	NES	4	FUBP3	5
ZBED6CL	1	PTPN13	2	CUTC	3	FBXO2	4	MGME1	5
PRR19	1	ZNF607	2	ZNF84	3	SH3TC2	4	DUSP5	5
HSD17B1	1	ZNF83	2	FRK	3	ZMAT3	4	ARL1	5
TCAP	1	PAPSS2	2	USP18	3	SP5	4	NAA20	5
MAB21L4	1	ZC4H2	2	STAC3	3	NT5DC4	4	CNTLN	5
FOXJ1	1	AURKAIP1	2	PHKA1	3	NR3C1	4	RRBP1	5
RAPGEF3	1	C21orf91	2	PHLDA2	3	CENPBD1	4	CRNKL1	5
CBX7	1	SLC37A2	2	MKX	3	NBEA	4	CCT6A	5
SLFN12	1	FBXO16	2	EAF2	3	FN3K	4	LRP1B	5
PGGHG	1	MALL	2	CDH1	3	PLEKHA2	4	SNX5	5
CD70	1	FBN3	2	ACOT11	3	ITGA2	4	DKK1	5
ABCA1	1	CHN1	2	ARHGAP44	3	CLMN	4	ABCC2	5
FAM200B	1	ZNF888	2	SULT1C2	3	KRT13	4	SEC23B	5
NFE4	1	CASD1	2	DPEP1	3	TNS3	4	TNKS2	5
TNFRSF11A	1	ADGRB2	2	SHOC1	3	HOXB3	4	ICAM1	5
IL1RAP	1	KCNH3	2	IFI27L2	3	GADD45B	4	NECTIN3	5
TMEM37	1	MCOLN2	2	RHOBTB1	3	PRSS23	4	MAL2	5
ODF3B	1	IGF2R	2	SYT1	3	PMEPA1	4	PALLD	5
MEX3B	1	GDA	2	TRNP1	3	DYNC2H1	4	DSTN	5
FGF19	1	CCDC71L	2	ZNF91	3	CYP1A1	4	DPYSL3	5
C17orf113	1	OBSL1	2	ADPRH	3	ASAP1	4
C2orf16	1	JPH1	2	LAMC2	3	GAA	4
TNFSF4	1	PPM1K	2	ATG4C	3	ORAI2	4
RP1L1	1	MDGA1	2	ABHD17C	3	IKBIP	4
DENND6B	1	AKAP12	2	HSH2D	3	COL17A1	4
HLA-DRA	1	RASSF2	2	CLMP	3	NPTXR	4
OSR1	1	SPTB	2	PLIN3	3	CELSR3	4
MUC19	1	PTPRG	2	PCDH1	3	PRSS33	4
DOCK6	1	TPM4	2	IL18R1	3	CD58	4
CSMD3	1	TFCP2L1	2	CDCP1	3	LOXL4	4
ATP6V0A4	1	PLTP	2	S100A16	3	WNT9A	4
HS3ST3B1	1	HSD17B7	2	IL20RA	3	KRT19	4
IQGAP2	1	ZSWIM5	2	LIN7A	3	NEURL1B	4
TRPM8	1	EML1	2	BHLHE41	3	GDF15	4
VAMP1	1	RSPO4	2	CACNA1D	3	CEACAM1	4
HPD	1	IL18	2	MBOAT1	3	AK4	4
ITGB2	1	ZNF566	2	MISP	3	LOXL2	4
SLC13A4	1	TGFB1	2	COMMD8	3	SLC39A11	4
SMC1B	1	ZNF254	2	SERPINE1	3	HEXIM1	4
CHST4	1	SLCO3A1	2	HIP1	3	RRM2B	4
RAB26	1	DNAJC12	2	GRIP2	3	KRT32	4
TNXB	1	GREB1	2	TRIM9	3	MDM2	4
C14orf132	1	NTSR1	2	SAMD11	3	MIR1915HG	4
ADRA2B	1	ADAM19	2	UCHL5	3	FLYWCH1	4
APBB3	1	HTR1B	2	PRAME	3	SULF2	4
DISP3	1	CRYBG2	2	MCCC1	3	ASB1	4
ABLIM2	1	EPHA1	2	LONRF2	3	TNFSF9	4
CPT1B	1	LAMB1	2	AZI2	3	PPFIBP1	4
FBXL13	1	IRX4	2	ZNF100	3	TNFRSF10C	4
TIAM2	1	PRSS3	2	PITX2	3	TTC3	4
SPNS3	1	SAMD13	2	DOC2B	3	FDXR	4
B3GNT3	1	HIVEP2	2	TTC39A	3	ARL4D	4
ZNF302	1	ZNF804A	2	MAML3	3	LIX1L	4
RRAD	1	ENC1	2	UBE2E1	3	ADAMTS14	4
CAVIN2	1	LIPG	2	ESRP1	3	HES2	4
XDH	1	PUS7	2	ABAT	3	HOXB5	4
KLK7	1	FNIP2	2	BDNF	3	GPC1	4
PCDH12	1	LYL1	2	PLEKHA4	3	PIP5KL1	4
SLC44A5	1	TMEM92	2	TLR6	3	NRG1	4
SMPD3	1	KRT222	2	TRIM10	3	HOXB7	4
ZNF589	1	AMIGO2	2	CCNB3	3	APOBEC3F	4
STC1	1	EVPL	2	KALRN	3	RND3	4
NFE2	1	SCARA3	2	MUC3A	3	ST6GALNAC5	4
GNMT	1	BMI1	2	NTN1	3	TINAGL1	4
PLXNB3	1	BTC	2	STON2	3	SERPINA1	4
GLI4	1	RBPMS	2	LIPH	3	FHL1	4
SH2D6	1	SH3BGRL	2	BICDL2	3	AXIN2	4
PIGZ	1	RASA3	2	LETM2	3	KRT81	4
DNM1	1	MET	2	AP1M2	3	STK25	4
GAL3ST1	1	VIPR1	2	WSB2	3	PDGFC	4
MB	1	ITPRID2	2	EPHB3	3	BTG2	4
ROR1	1	TGIF1	2	AKAP3	3	IER5	4
SOBP	1	SLC2A3	2	GATA3	3	CRIM1	4
GP1BA	1	B3GALT5	2	APOLD1	3	AHR	4
LGALS9	1	ZNF134	2	CAV2	3	MALT1	4
GRIN2C	1	TSPAN5	2	GALNT3	3	SH3BP4	4
FAM229A	1	BHLHA15	2	HNF1B	3	CD22	4
RIPOR3	1	NKX6-1	2	CAV1	3	KRT15	4
CALB2	1	FKBP1B	2	JCAD	3	THSD4	4
MAST4	1	ATP6V1B2	2	MEIS2	3	PHLDA3	4
ATP6V1FNB	1	MPZL3	2	ARG2	3	CYP24A1	4
NANOS1	1	BDH2	2	LIPE	3	MELTF	4
SLC46A3	1	ZFYVE28	2	BDH1	3	ANO1	4
SLC25A45	1	WASF3	2	PLEKHA6	3	SEMA3C	4
SSPO	1	SLC4A3	2	ARHGAP40	3	VIM	4
SCUBE1	1	LPAR5	2	TRERF1	3	PTPRK	4
NCAM1	1	ECM1	2	DACT1	3	SLC5A1	4
RGS9BP	1	SATB2	2	KBTBD11	3	PDGFB	4
SNCG	1	NAP1L1	2	KSR2	3	TP53INP1	4
BCAR1	1	SLC37A1	2	EGR3	3	COL18A1	4
AC118754.1	1	SLC16A9	2	ZNF117	3	PLK2	4
GAB2	1	FZD3	2	NGEF	3	CUEDC1	4
LHX4	1	SPATS2	2	DTNA	3	RPS27L	4
ADAMTS16	1	GREB1L	2	ST3GAL5	3	HOXB6	4
OPN3	1	RBM24	2	RHOBTB3	3	DCLK1	4
SPATC1	1	SC5D	2	CYB5R2	3	DCUN1D3	4
SAMD14	1	CNTNAP3B	2	SMIM3	3	SUSD2	4
RSRP1	1	PDE4B	2	GCNT3	3	KRT80	4
KCTD7	1	SORT1	2	SELL	3	APOBEC3C	4
LPAR1	1	EREG	2	TMEM62	3	ARSJ	4
SSTR5	1	GNG4	2	BEND7	3	ANKRD33B	4
FMN1	1	STN1	2	ACAA2	3	MICALL1	4
SLC26A7	1	GALNT5	2	KPNA5	3	GLIS3	4
HEG1	1	IRS1	2	SLC7A2	3	ARL4C	4
KIF21B	1	UNC13A	2	FAM122C	3	DDB2	4
KIAA1324	1	ZNF516	2	NKD2	3	GATA2	4
MGAM	1	PPARG	2	PXK	3	LYRM1	4
ALDH8A1	1	ITGB8	2	RNF141	3	AP002956.1	4
N4BP2L1	1	GJC1	2	TJP2	3	HOXB9	4
HLA-DRB1	1	PDLIM1	2	FNBP1	3	MAN1A1	4
NRBP2	1	TESC	2	SEC24D	3	TGM2	4
PPM1H	1	SUSD3	2	ZNF675	3	KRT7	4
PCDHAC2	1	ZNF426	2	NUBPL	3	EHF	4
CAPN5	1	SLC2A1	2	ATP2C2	3
NUAK2	1	MAPK8IP2	2	ANK3	3
TMEM151A	1	NEK3	2	XYLT1	3
GPR135	1	HMGCR	2	CARD10	3
RYR2	1	MSMO1	2	ZNF711	3
BAIAP3	1	ACAT2	2	PRKCQ	3
ARHGAP24	1	GAS6	2	PHF21A	3
PPP1R1B	1	FDFT1	2	KITLG	3
RASGRF1	1	PXDN	2	SEMA3E	3
SPOCK1	1	LIMA1	2	JUP	3
HLA-DPB1	1	CEMIP	2	SLC4A7	3
RGS5	1	NEDD4L	2	DDX60L	3
KLK10	1	PDLIM5	2	ATP8B1	3
CBARP	1	USP40	2	MTAP	3
SCN3B	1	HMGCS1	2	MYC	3
ADAMTSL4	1	SQLE	2	CGREF1	3
RUNX2	1			PRDM16	3
ZNF214	1			LRIG1	3
HMCN1	1			HMGA2	3
TP53I3	1			LGALS3	3
MAGEC2	1			ERRFI1	3
SLC35E2A	1			TUBA4A	3
ZNF789	1			FRRS1	3
PHEX	1			GRHL1	3
MOK	1			LINGO1	3
ALDH3A2	1			CPOX	3
SYBU	1			IL17RE	3
CLDN9	1			SELENOP	3
ISYNA1	1			BBS10	3
KCNIP3	1			ZNF816	3
SPRY1	1			APBB1	3
NUSAP1	1			FAM8A1	3
AKT3	1			ATG16L1	3
MTSS2	1			ACAA1	3
RASSF4	1			XYLB	3
VWA5A	1			KLF7	3
KLK5	1			C6orf141	3
ITGBL1	1			SCN3A	3
MBP	1			VDR	3
PLXNB1	1			TRIM15	3
ABCA2	1			MFGE8	3
FLNC	1			DUSP6	3
PIK3R1	1			CYB5B	3
HEXIM2	1			SASH1	3
PRKAA2	1			KLF5	3
ENO3	1			ZNF608	3
KAZALD1	1			OXCT1	3
CLDN15	1			GFY	3
EPHX1	1			GRHL2	3
BCAM	1			DGKD	3
STARD9	1			PDE3B	3
ATP8B3	1			ACSM3	3
TEX19	1			MYH15	3
CHST6	1			ATF7IP	3
OGFRL1	1			IGF2BP3	3
RTN1	1			IGSF9	3
CD74	1			NFIA	3
SORCS2	1			MYB	3
BLACAT1	1			ASPH	3
SCG2	1			DDN	3
MYBPH	1			NR5A2	3
STXBP6	1			WDR72	3
KRT16	1			VGF	3
HCN4	1			SCML1	3
IFFO2	1			DYNC1I2	3
KRT36	1			JUNB	3
CIITA	1			TIMP3	3
AK7	1			SUN3	3
LCN2	1			NAB2	3
GNG11	1			HS3ST1	3
CAPN12	1			SYK	3
TMTC1	1			ILDR2	3
KCNK6	1			KNOP1	3
TEX14	1			MAOB	3
SLC16A6	1			MEF2C	3
SLC5A3	1			PRKD3	3
TSPAN1	1			HK2	3
CORO6	1			L3MBTL3	3
DENND3	1			PRKACB	3
SERPINA5	1			ZNF525	3
CYSRT1	1			TMEM98	3
SRCIN1	1			NRIP1	3
DOC2A	1			SPRY4	3
TBX3	1			ANXA10	3
MYRF	1			RGS2	3
SLC27A1	1			HMGN5	3
OR51B5	1			ACSL5	3
TRIB2	1			S100A14	3
ANK1	1			TANK	3
NINL	1			ID2	3
TRIM22	1			CNTNAP2	3
AQP3	1			GEMIN5	3
XRCC4	1			DPP4	3
NEK6	1			NR2F1	3
SLC2A6	1			HKDC1	3
ACBD4	1
KLK8	1
SEMA3A	1
ENO2	1
ZBTB18	1
LTBP2	1
KRTAP2-3	1
SEMA3B	1
ADAMTS7	1
SIPA1L3	1
ALDH3B1	1
DLC1	1
TGOLN2	1
GAS1	1
PRF1	1
OTUB2	1
C16orf74	1
DENND5B	1
TACSTD2	1
INPP4B	1
PLEKHS1	1
PADI2	1
SYTL2	1
PALD1	1
FAM102A	1
CTSH	1
KSR1	1
MGAT5B	1
APOBEC3H	1
SECTM1	1
ALPK2	1
SH3RF2	1
GGT5	1
KCTD12	1
PBX1	1
DHRS2	1
PADI1	1
VWA7	1
LAMA4	1
CD33	1
SYNE3	1
HSPB8	1
TMEM74	1
NOL4L	1
PEG10	1
UNC13D	1
RIMS2	1
TMC5	1
BHMG1	1
GPAT2	1
VCAN	1
PADI3	1
S100A2	1
MAMDC2	1
NEBL	1
MAP1B	1
IGFBP3	1
PDE4D	1
TENM3	1
BMP4	1
SERINC2	1
APOBEC3G	1
SNTB1	1
SPARC	1
SLC1A3	1
