# Supplementary material for: Global and context-specific transcriptional consequences of oncogenic Fbw7 mutations
Source: eLife. 2022 Feb 28;11:e74338. doi: 10.7554/eLife.74338 (PMC8926403; doi:10.7554/eLife.74338)
Supplement: Figure 1—source data 3. — This Excel file includes the TRANSFAC & JASPAR, MSigDB, and GO term outputs enriched in differential (upregulated or downregulated) genes in Fbw7−/− and Fbw7R/+ Hct116 cells. GO, gene ontology. [file elife-74338-fig1-data3.xlsx]

## Sheet: Hct116 Full Enrichr Output
Hct116
Upregulated in Fbw7-/-
TRANSFAC & JASPAR	Overlap	P-value	Adjusted P-value	Old P-value	Old Adjusted P-value	Odds Ratio	Combined Score	Genes
KLF11 (human)	114/1388	3.5202e-16	1.09126e-13	0	0	2.57522	91.6336	SLC27A1	PRF1	LOXL4	ENO2	EPX	ENO3	RIMS2	CAPN5	SLC16A6	ADORA1	SLC25A45	MAMSTR	IGFBP3	SERPINF2	PCOLCE	CEL	UNC13D	INPP4B	ASPHD1	CLDN9	PRR15L	RGS9BP	KCNQ1	PADI3	PADI2	HOXB3	KCNQ5	HOXB8	HOXB7	EXD3	FBLIM1	RRAD	PDGFB	DTX1	INPP5D	ALDH3B1	MBP	TSPAN1	PRRT1	GGT5	ABCA2	ATP8B3
KLF4 (human)	116/1485	6.87939e-15	1.06631e-12	0	0	2.43347	79.3559	SLC27A1	PRF1	LOXL4	ENO2	EPX	ENO3	RIMS2	CAPN5	SLC16A6	ADORA1	SLC25A45	MAMSTR	IGFBP3	SERPINF2	PCOLCE	CEL	UNC13D	INPP4B	ACAP1	ASPHD1	CLDN9	PRR15L	RGS9BP	KCNQ1	PADI3	PADI2	HOXB3	KCNQ5	HOXB8	HOXB7	EXD3	FBLIM1	RRAD	PDGFB	DTX1	INPP5D	ALDH3B1	MBP	TSPAN1	PRRT1	GGT5	ABCA2
ZNF148 (human)	109/1591	1.8668e-10	1.92903e-08	0	0	2.07561	46.497	SLC27A1	ENO2	EPX	ENO3	RIMS2	NRBP2	CAPN5	SLC16A6	SLC25A45	MAMSTR	KCNH8	SERPINF2	PCOLCE	CEL	UNC13D	INPP4B	ASPHD1	PRR15L	RGS9BP	KCNQ1	PADI2	HOXB3	KCNQ5	HOXB8	NPTXR	EXD3	SLC26A1	FBLIM1	RRAD	PDGFB	STC1	DTX1	AK4	INPP5D	ALDH3B1	MBP	TSPAN1	GGT5	ABCA2	INCA1	PDE2A	EPHX1
NFE2 (human)	157/2681	1.49272e-09	1.15685e-07	0	0	1.78881	36.3535	ALDH1L1	CD82	KLHDC7B	NR3C1	ENO3	NRBP2	RGS5	RINL	RASSF4	NUSAP1	SAMD12	SH2D6	NANOS1	S100A2	MAMSTR	PCOLCE	CEL	TMEM80	SRCIN1	ANK1	TIAM2	SLFN12	INPP4B	SCNN1D	RGS9BP	KCNQ1	NINJ1	NUPR1	FTL	KANK3	EXD3	ISYNA1	SHC3	RTN1	COL13A1	DTX1	AK4	LTBP2	SLC5A1	AK5	PCDH12	GATA2
CACYBP (human)	86/1350	4.7927e-07	2.70591e-05	0	0	1.87516	27.2855	DOC2A	YJEFN3	ITGB2	FHL1	TNFAIP2	AATK	PRSS22	EPX	NR3C1	PRSS23	AQP3	LFNG	RIMS2	MB	PIP5KL1	PRX	CAPN5	CYP1B1	CTSH	SLC25A45	ABCD1	SYBU	LYNX1	EGFL7	PLA2G4D	MAMSTR	SERPINF2	PCOLCE	CEL	TMEM80	CPT1B	UNC13D	SSTR5	SCNN1D	ASPHD1	CLDN9	PRR15L	KCNQ1	ADSSL1	PADI2	NPTXR	HOXB7
SP3 (human)	85/1332	5.23725e-07	2.70591e-05	0	0	1.87752	27.1533	COL18A1	SLC27A1	ANKRD33B	CD82	KCNC4	FHL1	PIGZ	LOXL4	YBX2	NR3C1	ENO3	BBC3	LFNG	RIMS2	NRBP2	FAM102A	SESN1	PIP5KL1	CAPN5	CYP1B1	CCDC92	ABCD1	ADAMTS7	LYNX1	IZUMO4	CCDC78	KCNH8	SHROOM2	WNT9A	HSPG2	TMEM80	ANK1	SSTR5	ARL4C	VMAC	BCAM	F8	ZEB1	RRM2B	SCNN1D	ASPHD1	RGS9BP
SP1 (human)	88/1406	7.35505e-07	3.25723e-05	0	0	1.84027	25.9896	COL18A1	SLC27A1	ANKRD33B	CD82	KCNC4	FHL1	PIGZ	AATK	LOXL4	NR3C1	ENO3	BBC3	LFNG	RIMS2	NRBP2	SAMD14	FAM102A	SESN1	PIP5KL1	CAPN5	SLC16A6	CYP1B1	KIF21B	CCDC92	ABCD1	ADAMTS7	LYNX1	IZUMO4	CAMK1D	CCDC78	KCNH8	TFEB	SHROOM2	WNT9A	HSPG2	ANK1	SSTR5	ARL4C	VMAC	F8	ZEB1	SCNN1D
PCBP1 (human)	82/1360	7.55833e-06	0.000292885	0	0	1.75622	20.7109	COL18A1	SLC27A1	ANKRD33B	CD82	KCNC4	PIGZ	LOXL4	YBX2	NR3C1	ENO3	BBC3	RIMS2	GLI4	NRBP2	SAMD14	FAM102A	RASSF4	SESN1	PIP5KL1	CAPN5	FLOT1	CYP1B1	CCDC92	ABCD1	LYNX1	IZUMO4	CAMK1D	CCDC78	KCNH8	STARD9	TFEB	HSPG2	TMEM80	ANK1	ARL4C	F8	ZEB1	SCNN1D	ASPHD1	RGS9BP	KCNQ1	LPAR1
ZBTB7A (human)	82/1373	1.07331e-05	0.000369697	0	0	1.73728	19.8783	DOCK6	COL18A1	CDKN1A	SLC27A1	CD82	ITGB2	PIGZ	SECTM1	YBX2	NR3C1	SOBP	CELSR3	BBC3	RIMS2	NRBP2	SAMD14	FAM102A	FGF9	PIP5KL1	SLC16A6	PMEPA1	MAN1A1	KIF21B	CCDC92	C16ORF74	ABCD1	IZUMO4	KIRREL2	CCDC78	FBXO2	TFEB	SHROOM2	ABHD14B	NRG1	GAB2	TMEM80	SRCIN1	CPT1B	DNM1	SSTR5	VMAC	ZEB1
TEAD4 (human)	79/1354	3.53561e-05	0.00109604	0	0	1.68853	17.3074	COL18A1	BTG2	ANKRD33B	KCNC4	AATK	LOXL4	YBX2	NR3C1	ENO3	EDA2R	BBC3	LFNG	RIMS2	GLI4	NRBP2	SYDE1	SAMD14	RASSF4	PIP5KL1	FDXR	PMEPA1	SAMD12	CCDC92	ABCD1	ADAMTS7	CCDC78	SHROOM2	SRCIN1	ANK1	KCTD7	SSTR5	ARL4C	VMAC	MN1	BCAM	RRM2B	ASPHD1	RGS9BP	KCNQ1	ORAI2	MNS1	SEMA7A
ELF3 (human)	83/1488	0.000104764	0.00295243	0	0	1.60799	14.7353	KCNK6	COL18A1	ACADVL	SERPINA1	TINAGL1	ITGB2	FHL1	PRF1	TNFAIP2	TNFRSF13C	PEAR1	BEST3	PCSK5	LFNG	RGS5	FGF9	MB	PIP5KL1	ZNF648	NUSAP1	CTSH	ANKRD2	ABCD1	GPR179	HS3ST3B1	CCDC159	SPNS3	VWA5A	KRT7	HSD11B1L	PCOLCE	TMEM80	DDB2	ANO1	CEACAM1	ASPHD1	CATSPERG	ORAI2	B3GNT3	ODF3B	S100A3	NPTXR
TFAP2A (mouse)	90/1663	0.000152379	0.00393646	0	0	1.55937	13.7055	DOCK6	COL18A1	GAL3ST1	ANKRD33B	MAML2	FLT3	FHL1	PIGZ	KLHDC7B	TNFRSF13C	PRSS22	ENO3	AQP3	SMPD3	NRBP2	RINL	KIF21B	SCARF1	EGFL7	CCDC159	FBXO2	MAMDC2	F2R	VWA5A	ABHD14B	PCOLCE	ABHD14A	SRCIN1	ADRA2B	CPT1B	SORCS2	UNC13D	ANO1	BCAM	ACAP1	ASPHD1	MYL2	HOXB4	EFHC1	ROR1	KCNQ5	S100A3
ZNF281 (human)	58/986	0.00032551	0.00765419	0	0	1.68254	13.511	SERPINA1	ANKRD33B	ATP8A1	DENND5B	KCNC4	BBC3	RIMS2	GLI4	RASSF4	CAPN5	CTSH	SAMD12	NINL	ABCD1	LYNX1	WNT9A	SRCIN1	ANK1	UNC13D	SSTR5	TIAM2	ACAP1	KCNQ1	HOXB4	ROR1	MNS1	TRIB2	RAPGEF3	SEMA7A	ISYNA1	KRT80	LPAR1	STC1	CXCR4	PRICKLE1	GATA2	KLK6	TYMP	CLMN	GPC1	ALDH3B1	PDGFC
MIR133B (human)	81/1500	0.000355553	0.00765419	0	0	1.54782	12.2925	SLC27A1	MAST4	FHL1	AATK	LOXL4	ENO2	CELSR3	LFNG	MB	PIP5KL1	AKT3	PRX	FDXR	GPR135	LYNX1	CAMK1D	CCDC78	CCDC159	GAA	LMO2	SLC39A11	HSD11B1L	CYBB	GAB2	TMC5	TMEM80	SYTL2	DDB2	KCTD7	SSTR5	CLIP3	TIAM2	CEACAM1	CLDN15	ASPHD1	KCNQ1	PADI2	ACSBG1	KCTD12	CUEDC1	PADI1	SEMA3B
MZF1 (human)	76/1389	0.000370364	0.00765419	0	0	1.56694	12.3804	TINAGL1	DOC2A	ITGB2	FHL1	EPX	NR3C1	SOBP	ENO3	LFNG	RIMS2	FOXQ1	SAMD14	CAPN5	CTSH	SH2D6	TNS3	KIRREL2	CAMK1D	KCNH8	TFEB	ABHD14A	TMEM80	CPT1B	TEX19	SSTR5	CLIP3	ZEB1	RRM2B	ASPHD1	KCNQ1	ORAI2	EFHC1	KCTD12	HOXB7	ISYNA1	TNXB	SLC5A11	ASAP1	PHYHIP	FSTL3	KLK6	PLAC8
TFAP2C (human)	78/1485	0.00101874	0.019738	0	0	1.49739	10.3158	RYR2	COL18A1	ALDH1L1	ANKRD33B	ATP8A1	KCNC4	RASGRF1	ENO2	NR3C1	AQP3	SERPINA5	HS6ST3	EPS8	FAM122A	GLI4	FDXR	PMEPA1	KIF21B	NINL	TNS3	IZUMO4	CCDC159	ITGA2	GAA	PDE4D	LMO2	SLC39A11	CEL	KRT32	TMC5	ANK1	TEX19	SSTR5	F8	CEACAM1	CLDN3	KCNQ1	DDIT4	NINJ1	ADSSL1	AHRR	ROR1
TFAP2A (human)	166/3613	0.00117213	0.0197751	0	0	1.32909	8.96993	SLC27A1	LOXL4	KLHDC7B	CLDN2	NR3C1	ENO3	BEST3	HS6ST3	EPS8	RIMS2	SAMD14	RINL	FGF9	FDXR	SLC16A6	CYP1B1	SLC25A45	CCDC92	TNS3	SYBU	NANOS1	CCDC78	CCDC159	FBXO2	OSR1	F2R	KRT7	PCOLCE	HSPG2	TMEM80	SRCIN1	ANK1	CLIP3	ALDH3A2	SCNN1D	ASPHD1	RGS9BP	MAP1B	KCNQ1	NINJ1	HOXB7	SCG2
SNAI2 (human)	75/1428	0.00127581	0.0197751	0	0	1.495	9.96296	KCNK6	COL18A1	CDKN1A	SERPINA1	GAL3ST1	CEP164	SECTM1	AATK	BEST3	AQP3	BBC3	HHAT	FAM102A	RINL	SAMD12	SH2D6	JAK3	TGM2	NANOS1	CHST6	IZUMO4	MAMSTR	SPNS3	ARAP2	C4ORF47	SHROOM2	PCOLCE	TMEM80	TEX19	SSTR5	BCAM	PRR19	CLDN9	PRR15L	SPATC1	KCNQ1	NINJ1	ADSSL1	B3GNT3	AHRR	NUPR1	PADI1
SNAI1 (human)	75/1428	0.00127581	0.0197751	0	0	1.495	9.96296	KCNK6	COL18A1	CDKN1A	SERPINA1	GAL3ST1	CEP164	SECTM1	AATK	BEST3	AQP3	BBC3	HHAT	FAM102A	RINL	SAMD12	SH2D6	JAK3	TGM2	NANOS1	CHST6	IZUMO4	MAMSTR	SPNS3	ARAP2	C4ORF47	SHROOM2	PCOLCE	TMEM80	TEX19	SSTR5	BCAM	PRR19	CLDN9	PRR15L	SPATC1	KCNQ1	NINJ1	ADSSL1	B3GNT3	AHRR	NUPR1	PADI1
TCF3 (human)	75/1428	0.00127581	0.0197751	0	0	1.495	9.96296	KCNK6	COL18A1	CDKN1A	SERPINA1	GAL3ST1	CEP164	SECTM1	AATK	BEST3	AQP3	BBC3	HHAT	FAM102A	RINL	SAMD12	SH2D6	JAK3	TGM2	NANOS1	CHST6	IZUMO4	MAMSTR	SPNS3	ARAP2	C4ORF47	SHROOM2	PCOLCE	TMEM80	TEX19	SSTR5	BCAM	PRR19	CLDN9	PRR15L	SPATC1	KCNQ1	NINJ1	ADSSL1	B3GNT3	AHRR	NUPR1	PADI1
ETV4 (human)	73/1403	0.00188717	0.0278583	0	0	1.47775	9.26946	KCNK6	COL18A1	ACADVL	ATP8A1	ITGB2	PRSS22	PCSK5	BBC3	LFNG	FGF9	ADORA1	RTTN	UPP1	C16ORF74	SYBU	ADAMTS7	NANOS1	MAMDC2	ABHD14B	NRG1	GP1BA	NRG2	TMC5	INPP4B	F8	ACAP1	CLDN15	ASPHD1	MAP1B	KCNQ1	B3GNT3	CHST4	HOXB6	DLX1	TNXB	PDGFB	ALOX12	PHYHIP	MALT1	KLK6	RAB26	CAMK2N1
TCFAP2A (human)	71/1367	0.00227216	0.0312886	0	0	1.47334	8.96828	COL18A1	ANKRD33B	FHL1	PIGZ	AATK	KLHDC7B	NR3C1	HS6ST3	RIMS2	NRBP2	SYDE1	FAM102A	SESN1	SLC16A6	CCDC92	C16ORF74	ABCD1	IZUMO4	CAMK1D	CCDC78	FBXO2	TFEB	SHROOM2	ABHD14B	GAB2	HSPG2	TMEM80	SRCIN1	ANK1	F8	ZEB1	SCNN1D	RGS9BP	KCNQ1	SGK1	DCUN1D3	PDGFB	DTX1	DENND3	LTBP2	PRICKLE1	GATA2
NFIA (human)	73/1416	0.00238782	0.0312886	0	0	1.46239	8.82897	SLC44A5	KCNK6	GAL3ST1	TNFAIP2	AATK	GRPR	CLDN2	NR3C1	LFNG	FAM102A	MB	PMEPA1	SVEP1	SH2D6	SLC39A1	GPR135	PHLDA3	EDN1	LYNX1	PDE4D	NRG1	WNT9A	KRT32	ANK1	UNC13D	SYTL3	DNM1	SYTL2	DDB2	ANO1	ACAP1	DCT	PRR19	PRR15L	ADSSL1	CDHR3	VAMP1	CHST4	SGK1	RAPGEF3	KRT80	RTN1
MTF1 (human)	74/1440	0.00242234	0.0312886	0	0	1.45778	8.78022	COL18A1	DOC2A	RASGRF1	FHL1	MT1X	YBX2	OPLAH	PCSK5	HS6ST3	RIMS2	FOXQ1	GLI4	FGF9	UCN2	PIP5KL1	CYP1B1	CCDC92	ABCD1	EID2B	NANOS1	MAMSTR	IGFBP3	LIX1L	KRT7	ABHD14B	WNT9A	AXIN2	UPK3B	TMEM80	HIST2H2BE	RUNX2	MN1	ORAI2	MT1F	SMTNL2	TRIB2	ISYNA1	SHC3	PRKAA2	TNXB	PDGFB	SLC5A11
SREBF2 (human)	70/1361	0.00309227	0.0383058	0	0	1.45644	8.41657	COL18A1	EHF	SLC27A1	SERPINA1	TINAGL1	MAML2	CD82	ITGB2	FHL1	PRSS22	EPX	NR3C1	BBC3	LFNG	RIMS2	FADS2	KIF21B	HS3ST3B1	LYNX1	SLC39A11	KRT35	PCOLCE	CPT1B	UNC13D	SSTR5	ARL4C	ARL4D	BCAM	CLDN3	ACAP1	CLDN15	MYL2	CATSPERG	KCNQ1	EFHC1	AHRR	NUPR1	HOXB7	CUEDC1	SKAP1	RBKS	FTL
JUN (human)	137/2976	0.00321274	0.0383058	0	0	1.31639	7.55691	SPARC	CD82	PRF1	CLDN2	ENO3	BEST3	IFIT3	FADS2	SLC16A6	SVEP1	KIRREL2	S100A2	LMO2	SYTL5	SRCIN1	CPT1B	ANK1	RUNX2	SYTL2	TIAM2	SLFN12	ALDH3A2	MYL2	NINJ1	PADI2	CD226	TRIB2	SCG2	PADI1	SKAP1	HOXB5	KANK3	COL17A1	EXD3	SHC3	RTN1	TACSTD2	GLIS3	AK4	SLC5A3	ALDH3B1	KCNMB4
NFKB1 (human)	157/3497	0.00418662	0.0480686	0	0	1.28588	7.0413	ALDH1L1	SPON1	MAML2	LOXL4	EPX	ENO3	LOXL2	RIMS2	FOXQ1	NRBP2	SYDE1	SAMD14	HHAT	AKT3	ADORA1	RTTN	SAMD12	CCDC92	SYBU	GPR179	NANOS1	KIRREL2	MAMSTR	IGFBP3	KCNH8	SPNS3	PCOLCE	CPT1B	SLFN12	VMAC	ORAI2	ODF3B	KCNQ5	ALPK2	NUPR1	HPD	SKAP1	ISYNA1	RRAD	GLIS3	DTX1	TMTC1
MSigDB
p53 Pathway	29/200	3.07e-10	1.47e-08	0	0	4.55984	99.8846	CDKN1A	BTG2	NOTCH1	CD82	RRAD	RPS27L	KLK8	ZFP36L1	ZMAT3	SESN1	FDXR	EPS8L2	UPP1	IER5	PHLDA3	HEXIM1	PLK2	FUCA1	F2R	EPHX1	VWA5A	DDB2	DDIT4	NINJ1	MDM2	TNFSF9	NUPR1	FGF13	MXD4
Epithelial Mesenchymal Transition	23/200	1.48e-06	3.55e-05	0	0	3.46347	46.4948	SPARC	CXCL8	GADD45B	LRP1	FUCA1	IGFBP3	ITGA2	APLP1	PCOLCE	FBLN1	ENO2	THBS1	FSTL3	LOXL2	VCAN	GPC1	COL7A1	PMEPA1	SPOCK1	VIM	SCG2	SNTB1	TGM2
TNF-alpha Signaling via NF-kB	19/200	0.000164	0.00157793	0	0	2.78177	24.2387	ABCA1	BTG2	CDKN1A	EDN1	GADD45B	PLK2	TNFAIP2	SLC2A6	IFIT2	NFKBIA	SNN	NINJ1	SLC16A6	TNFSF9	PMEPA1	PLPP3	SGK1	IER5	BIRC3
Estrogen Response Early	19/200	0.000164	0.00157793	0	0	2.78177	24.2387	OPN3	MAST4	HSPB8	SEMA3B	KRT13	GAB2	AQP3	PRSS23	DHRS2	KLK10	THSD4	CALB2	KRT19	FAM102A	DLC1	KRT15	ALDH3B1	SYBU	TGM2
KRAS Signaling Dn	19/200	0.000164	0.00157793	0	0	2.78177	24.2387	RYR2	BTG2	EDN1	TGFB2	CAMK1D	IDUA	KRT13	GP1BA	YBX2	UPK3B	KLK8	KLK7	LFNG	ZC2HC1C	SNN	AKR1B10	KRT15	SGK1	TAS2R4
Coagulation	14/138	0.0006	0.00479652	0	0	2.98018	22.1109	SPARC	SERPINA1	LRP1	ITGA2	PDGFB	GP1BA	KLK8	PRSS23	THBS1	F8	DCT	CAPN5	CTSH	RAPGEF3
Myogenesis	17/200	0.00125466	0.00860342	0	0	2.45467	16.3994	CDKN1A	SPARC	NOTCH1	GADD45B	GAA	IGFBP3	HSPB8	FHL1	MYBPH	ENO3	MYH3	MB	MYL2	BDKRB2	TCAP	NCAM1	ANKRD2
Hypoxia	16/200	0.00317425	0.0138513	0	0	2.29443	13.1991	CDKN1A	GAA	IGFBP3	PDGFB	STC1	CXCR4	AK4	ENO2	NR3C1	ENO3	PLAC8	HOXB9	GPC1	DDIT4	GCNT2	TGM2
Estrogen Response Late	16/200	0.00317425	0.0138513	0	0	2.29443	13.1991	SERPINA1	OPN3	HSPB8	SEMA3B	KRT13	PRSS23	KLK10	DHRS2	KLK11	SERPINA5	ALDH3A2	KRT19	FAM102A	ALDH3B1	PLXNB1	SGK1
Glycolysis	16/200	0.00317425	0.0138513	0	0	2.29443	13.1991	CHST6	GAL3ST1	IDUA	IGFBP3	STC1	CXCR4	AK4	ENO2	VCAN	CLDN3	CLDN9	GPC1	DDIT4	CAPN5	B3GNT3	CHST4
KRAS Signaling Up	16/200	0.00317425	0.0138513	0	0	2.29443	13.1991	SPON1	FUCA1	IGFBP3	ITGA2	ITGB2	SEMA3B	VWA5A	CXCR4	WNT7A	GNG11	ANO1	FGF9	ITGBL1	TRIB2	TSPAN1	BIRC3
Inflammatory Response	15/200	0.00754876	0.030195	0	0	2.13633	10.4389	ABCA1	CDKN1A	BTG2	EDN1	CXCL8	CD82	CD70	LPAR1	CYBB	GP1BA	AHR	BST2	NFKBIA	TNFSF9	SCARF1
GO BP
regulation of cell migration (GO:0030334)	38/408	1.83814e-07	0.000305232	0	0	2.7677	42.9252	SEMA7A	NOTCH1	SEMA3C	SEMA3A	SEMA3B	ULK4	PDGFB	SEMA3G	STC1	NEDD9	PTPRK	THBS1	WNT11	FGF9	PIP5KL1	PDGFC	TP53INP1	GCNT2	CYP1B1	CTSH	CD74	EDN1	F2R	FUZ	SRCIN1	BST2	SH3RF2	CEACAM1	CLDN3	KRT16	DLC1	FGF19	FGF18	PLXNB3	PLXNB1	AMOTL2	SGK1	BCAR1
DNA cytosine deamination (GO:0070383)	6/9	1.90473e-07	0.000305232	0	0	52.5457	813.079	APOBEC3C	APOBEC3D	APOBEC3F	APOBEC3G	APOBEC3H	APOBEC3B
negative regulation of cellular process (GO:0048523)	46/566	5.22274e-07	0.000557962	0	0	2.39229	34.6047	COL18A1	BTG2	CDKN1A	NOTCH1	CXCL8	DCUN1D3	FHL1	DYSF	FBLN1	PTPRK	KLK8	IFIT3	WNT11	CAMK2N1	CLMN	TP53INP1	CYP1B1	SH3BP4	SH2B3	CD33	APOBEC3C	APOBEC3D	TGFB2	APOBEC3F	APOBEC3G	APOBEC3H	IGFBP3	SUSD2	INCA1	F2R	ITGA1	FUZ	WNT9A	AXIN2	DHRS2	TEX19	SSTR5	BST2	CLDN3	MYL2	DLC1	PLXNB3
cytidine to uridine editing (GO:0016554)	6/11	9.8296e-07	0.000675743	0	0	31.5241	436.064	APOBEC3C	APOBEC3D	APOBEC3F	APOBEC3G	APOBEC3H	APOBEC3B
myelination (GO:0042552)	11/48	1.0542e-06	0.000675743	0	0	7.85061	108.046	GAL3ST1	MYRF	PLLP	GPC1	MPZ	CXCR4	MBP	ACSBG1	SCN2A	ABCD1	KLK6
negative regulation of cell population proliferation (GO:0008285)	34/379	1.8952e-06	0.000932536	0	0	2.64423	34.8409	COL18A1	BTG2	CDKN1A	NOTCH1	CXCL8	FBLN1	PTPRK	GATA2	IFIT3	CAMK2N1	CLMN	TP53INP1	CYP1B1	SH3BP4	SH2B3	CD33	TGFB2	IGFBP3	INCA1	F2R	ITGA1	FUZ	WNT9A	AXIN2	DHRS2	TBX3	SSTR5	PARP10	MN1	CLDN3	DLC1	AQP11	PLXNB1	NUPR1
regulation of single stranded viral RNA replication via double stranded DNA intermediate (GO:0045091)	7/18	2.03674e-06	0.000932536	0	0	16.735	219.298	APOBEC3C	APOBEC3D	APOBEC3F	CXCL8	APOBEC3G	APOBEC3H	APOBEC3B
extracellular matrix organization (GO:0030198)	29/300	2.48693e-06	0.000996325	0	0	2.86217	36.9348	COL17A1	COL18A1	SPARC	COL13A1	LAMA4	ITGB2	KLK5	PDGFB	LOXL4	THBS1	KLK7	THSD4	LOXL2	ADAMTS16	ADAMTS14	SCUBE1	ADAMTSL4	ADAMTS17	FLOT1	CYP1B1	ADAMTS7	TGFB2	ITGA2	SERPINF2	APLP1	ITGA1	HSPG2	VCAN	COL7A1
DNA deamination (GO:0045006)	6/13	3.42598e-06	0.0011665	0	0	22.5149	283.33	APOBEC3C	APOBEC3D	APOBEC3F	APOBEC3G	APOBEC3H	APOBEC3B
embryonic skeletal system development (GO:0048706)	9/35	3.63963e-06	0.0011665	0	0	9.12092	114.227	WNT11	HOXB9	OSR1	HOXB4	HOXB3	FUZ	WNT9A	PCSK5	SULF2
regulation of transposition (GO:0010528)	7/21	6.75347e-06	0.00196772	0	0	13.1469	156.519	APOBEC3C	APOBEC3D	APOBEC3F	APOBEC3G	APOBEC3H	TEX19	APOBEC3B
negative regulation of single stranded viral RNA replication via double stranded DNA intermediate (GO:0045869)	6/15	9.37736e-06	0.00250454	0	0	17.5098	202.714	APOBEC3C	APOBEC3D	APOBEC3F	APOBEC3G	APOBEC3H	APOBEC3B
negative regulation of cell-substrate adhesion (GO:0010812)	9/40	1.19448e-05	0.00294484	0	0	7.64781	86.6896	ACER2	NOTCH1	TACSTD2	GCNT2	SPOCK1	FBLN1	MELTF	EFNA5	THBS1
negative regulation of cell motility (GO:2000146)	15/114	1.97632e-05	0.00452436	0	0	4.01013	43.4365	CD74	TACSTD2	STC1	FBLN1	FUZ	PTPRK	BST2	CLDN3	WNT11	KRT16	PIP5KL1	DLC1	TP53INP1	PLXNB3	CYP1B1
negative regulation of cell migration (GO:0030336)	17/144	2.40503e-05	0.00513875	0	0	3.54743	37.7282	CD74	LRP1	IGFBP3	TACSTD2	STC1	FUZ	PTPRK	BST2	CLDN3	WNT11	KRT16	PIP5KL1	DLC1	TP53INP1	PLXNB3	CYP1B1	PHLDB2
base conversion or substitution editing (GO:0016553)	6/18	3.1625e-05	0.00612884	0	0	13.1303	136.05	APOBEC3C	APOBEC3D	APOBEC3F	APOBEC3G	APOBEC3H	APOBEC3B
negative regulation of transposition (GO:0010529)	7/26	3.25087e-05	0.00612884	0	0	9.68464	100.081	APOBEC3C	APOBEC3D	APOBEC3F	APOBEC3G	APOBEC3H	TEX19	APOBEC3B
regulation of cell population proliferation (GO:0042127)	51/764	3.50271e-05	0.00623676	0	0	1.92837	19.7839	COL18A1	CDKN1A	BTG2	CXCL8	FLT3	PTPRK	IFIT3	FGF9	CYP1B1	CTSH	IER5	CD33	EDN1	KSR1	IGFBP3	F2R	ITGA1	NRG1	WNT9A	GAB2	AXIN2	SSTR5	CLDN3	HCLS1	NUPR1	SGK1	NOTCH1	PDGFB	TNFRSF11A	THBS1	ZFP36L1	CAMK2N1	CLMN	PDGFC	TP53INP1	GCNT2	SH3BP4	SH2B3	TGFB2	INCA1	FUZ	DHRS2
polyol transport (GO:0015791)	5/12	4.33415e-05	0.00731102	0	0	18.7369	188.238	SLC5A11	AQP11	SLC5A1	AQP3	SLC5A3
epidermis development (GO:0008544)	12/83	5.17325e-05	0.00829014	0	0	4.46132	44.0307	ALDH3A2	COL17A1	NTF4	DCT	COL7A1	KRT15	KLK5	SVEP1	KRT32	EDA2R	KLK7	HLA-DRB1
extracellular structure organization (GO:0043062)	21/216	5.43698e-05	0.00829786	0	0	2.8597	28.0814	COL17A1	COL18A1	SPARC	COL13A1	ITGA2	LAMA4	APLP1	ITGB2	ITGA1	PDGFB	TEX14	HSPG2	THBS1	THSD4	ADAMTS16	ADAMTS14	VCAN	ADAMTSL4	COL7A1	ADAMTS17	ADAMTS7
negative regulation of myoblast differentiation (GO:0045662)	5/13	6.82888e-05	0.00993773	0	0	16.3939	157.246	NOTCH1	PRICKLE1	ANKRD2	TBX3	EID2B
positive regulation of intracellular signal transduction (GO:1902533)	39/546	7.1316e-05	0.00993773	0	0	2.06088	19.6781	FLT3	PDGFB	LPAR1	SECTM1	PIK3R1	ADRB2	THBS1	MALT1	EDA2R	BBC3	WNT11	FGF9	PDGFC	GCNT2	LGALS9	LURAP1	TRIM22	TGM2	HEXIM1	CD74	TGFB2	KSR1	GDF15	PLK2	NEK6	F2R	NRG1	NRG2	GAB2	ADRA2B	BST2	FGF19	FGF18	HCLS1	ROR1	PLXNB1	NUPR1	HLA-DRB1	BIRC3
negative regulation of fibroblast growth factor receptor signaling pathway (GO:0040037)	5/14	0.000103001	0.0137549	0	0	14.5716	133.779	GPC1	FUZ	SPRY1	THBS1	SULF2
negative regulation of chemotaxis (GO:0050922)	7/32	0.000137124	0.0175793	0	0	7.35803	65.4469	SEMA7A	NOTCH1	SEMA3C	SEMA3A	SEMA3B	SEMA3G	THBS1
external encapsulating structure organization (GO:0045229)	20/217	0.00016863	0.0207869	0	0	2.69184	23.3862	COL17A1	COL18A1	SPARC	COL13A1	ITGA2	LAMA4	APLP1	ITGB2	ITGA1	PDGFB	HSPG2	THBS1	THSD4	ADAMTS16	ADAMTS14	VCAN	ADAMTSL4	COL7A1	ADAMTS17	ADAMTS7
cAMP-mediated signaling (GO:0019933)	6/25	0.000241826	0.0284783	0	0	8.2898	69.0316	RIMS2	KSR1	PDE4D	PDE2A	AHR	RAPGEF3
semaphorin-plexin signaling pathway (GO:0071526)	7/35	0.000248797	0.0284783	0	0	6.56865	54.5124	SEMA7A	SEMA3C	SEMA3A	SEMA3B	SEMA3G	PLXNB3	PLXNB1
positive regulation of heart rate (GO:0010460)	5/17	0.000290279	0.0320808	0	0	10.927	88.9968	RYR2	EDN1	PDE4D	KCNQ1	SCN3B
myelin maintenance (GO:0043217)	4/10	0.000324886	0.0347086	0	0	17.4649	140.278	MYRF	PRX	CXCR4	ABCD1
histone citrullination (GO:0036414)	3/5	0.00047516	0.0461481	0	0	39.2507	300.341	PADI3	PADI2	PADI1
positive regulation of CD4-positive, CD25-positive, alpha-beta regulatory T cell differentiation (GO:0032831)	3/5	0.00047516	0.0461481	0	0	39.2507	300.341	HLA-DRA	LGALS9	HLA-DRB1
protein citrullination (GO:0018101)	3/5	0.00047516	0.0461481	0	0	39.2507	300.341	PADI3	PADI2	PADI1
GO CC
collagen-containing extracellular matrix (GO:0062023)	38/380	2.86927e-08	6.255e-06	0	0	2.99873	52.0779	COL17A1	COL18A1	SPON1	SEMA7A	SPARC	SERPINA1	TINAGL1	TNXB	COL13A1	LAMA4	SEMA3B	PDGFB	FBLN1	LTBP2	THBS1	THSD4	SERPINA5	LOXL2	ADAMTSL4	GPC1	CTSH	NCAM1	HMCN1	LGALS9	TGM2	ANGPT4	TGFB2	EGFL7	GDF15	SERPINF2	APLP1	PCOLCE	SSC5D	HSPG2	KAZALD1	BCAM	VCAN	COL7A1
MHC class II protein complex (GO:0042613)	6/13	3.42598e-06	0.000373432	0	0	22.5149	283.33	HLA-DRB5	HLA-DPB1	HLA-DRA	HLA-DOA	HLA-DRB1	HLA-DPA1
MHC protein complex (GO:0042611)	6/20	6.1979e-05	0.00428759	0	0	11.2534	109.031	HLA-DRB5	HLA-DPB1	HLA-DRA	HLA-DOA	HLA-DRB1	HLA-DPA1
intermediate filament (GO:0005882)	9/50	7.86714e-05	0.00428759	0	0	5.77949	54.6175	VMAC	SYNM	KRT16	KRT13	KRT7	VIM	KRT20	NES	HLA-DRB1
intermediate filament cytoskeleton (GO:0045111)	11/84	0.000259273	0.0113043	0	0	3.97162	32.7962	SYNM	KRT80	SYCE1L	KRT16	KRT13	KRT7	VIM	KRT20	PHLDB2	NES	HLA-DRB1
endoplasmic reticulum lumen (GO:0005788)	23/285	0.000401936	0.0127546	0	0	2.3294	18.2141	COL17A1	COL18A1	SPON1	SERPINA1	COL13A1	IGFBP3	PDGFB	WNT7A	PRSS23	THBS1	FSTL3	TGOLN2	FOXRED2	F8	VCAN	ADAMTSL4	ARSJ	COL7A1	PDGFC	ARSG	MELTF	SCG2	ADAMTS7
integral component of lumenal side of endoplasmic reticulum membrane (GO:0071556)	6/28	0.000468057	0.0127546	0	0	7.15825	54.8818	CD74	HLA-DRB5	HLA-DPB1	HLA-DRA	HLA-DRB1	HLA-DPA1
lumenal side of endoplasmic reticulum membrane (GO:0098553)	6/28	0.000468057	0.0127546	0	0	7.15825	54.8818	CD74	HLA-DRB5	HLA-DPB1	HLA-DRA	HLA-DRB1	HLA-DPA1
integral component of plasma membrane (GO:0005887)	78/1454	0.000556893	0.0134892	0	0	1.53378	11.4928	KCNK6	GAL3ST1	TENM3	CD82	FLT3	KCNC4	IL1RAP	PTPRK	GRPR	PHEX	FADS2	SLC16A6	ADORA1	CNGA1	BDKRB2	PCDHAC2	CD33	HLA-DPA1	SLC13A4	KIRREL2	KCNH8	F2R	CYBB	GP1BA	CEL	ADRA2B	SSTR5	ANO1	BCAM	CEACAM1	CLDN3	SCNN1D	KCNQ1	B3GNT3	VAMP1	ROR1	KCNQ5	CD226	PLPP3	COL17A1	SEMA7A	SLC26A1
lysosome (GO:0005764)	32/477	0.000904617	0.0197207	0	0	1.91381	13.4119	TINAGL1	LRP1	IDUA	PRF1	CXCR4	ADRB2	PLD1	SLC2A6	BBC3	GPC1	FLOT1	CTSH	ATP6V0A4	ARSG	HLA-DOA	ABCD1	HLA-DPA1	ABCA2	CD74	HLA-DRB5	FUCA1	GAA	TFEB	HSPG2	GRIN2B	UNC13D	CLCN7	VCAN	KCNQ1	HLA-DPB1	HLA-DRA	HLA-DRB1
cell-cell junction (GO:0005911)	21/271	0.00118225	0.0234301	0	0	2.22413	14.9914	COL17A1	KIRREL2	NOTCH1	COL13A1	HEG1	SHROOM2	PTPRK	CLDN2	AQP3	LIN7B	RASIP1	CEACAM1	CLDN3	CDH22	FLOT1	CDHR3	FAT2	HMCN1	STXBP6	PLPP3	NECTIN4
endocytic vesicle (GO:0030139)	16/189	0.0017953	0.0326146	0	0	2.44172	15.438	ABCA1	CD74	HLA-DRB5	SPARC	LRP1	LPAR1	DYSF	WNT7A	PLD1	RAB24	MDM2	HLA-DPB1	HLA-DRA	SCARF1	HLA-DRB1	HLA-DPA1
endocytic vesicle membrane (GO:0030666)	14/158	0.0022224	0.0372679	0	0	2.56358	15.6614	CD74	HLA-DRB5	LRP1	CYBB	WNT7A	ADRB2	TGOLN2	MDM2	HLA-DPB1	HLA-DRA	ATP6V0A4	SCARF1	HLA-DRB1	HLA-DPA1
COPII-coated ER to Golgi transport vesicle (GO:0030134)	9/79	0.00249958	0.038922	0	0	3.38002	20.2518	CD74	F8	HLA-DRB5	SERPINA1	COL7A1	HLA-DPB1	HLA-DRA	HLA-DRB1	HLA-DPA1
P-body (GO:0000932)	9/80	0.00272626	0.0392002	0	0	3.33224	19.6763	APOBEC3C	APOBEC3D	MEX3B	APOBEC3F	APOBEC3G	APOBEC3H	SAMD4A	ZFP36L1	APOBEC3B
sarcolemma (GO:0042383)	7/52	0.00287708	0.0392002	0	0	4.08355	23.8927	RYR2	SYNM	CCDC78	AHNAK2	DYSF	ALOX12	FLNC
adherens junction (GO:0005912)	12/132	0.00362051	0.0463958	0	0	2.63287	14.7998	CEACAM1	NOTCH1	CDH22	FLOT1	SHROOM2	CDHR3	FAT2	HMCN1	STXBP6	PLPP3	NECTIN4	LIN7B
clathrin-coated endocytic vesicle membrane (GO:0030669)	8/69	0.00383084	0.0463958	0	0	3.44464	19.1683	TGOLN2	CD74	HLA-DRB5	HLA-DPB1	HLA-DRA	ADRB2	HLA-DRB1	HLA-DPA1
Hct116
Upregulated in Fbw7R/+
TRANSFAC & JASPAR	Overlap	P-value	Adjusted P-value	Old P-value	Old Adjusted P-value	Odds Ratio	Combined Score	Genes
KLF11 (human)	54/1388	3.0918e-09	9.24449e-07	0	0	2.68926	52.6948	COL18A1	SERPINA1	TINAGL1	FHL1	PRF1	AATK	LOXL4	FAM110A	RIMS2	RASSF1	PIP5KL1	PRX	PMEPA1	SCARF1	ZNF385A	HES6	AMN	IGFBP3	SERPINF2	LRRC37B	PADI3	PADI2	HOXB3	HOXB8	HOXB7	CUEDC1	ABCG1	SHANK2	HDAC4	EXD3	KRT80	FBLIM1	PDGFB	GBX2	INPP5D	GPC1	MICALL1	PLEKHG4B	SUSD3	HES2	ACBD4	SUSD2
KLF4 (human)	55/1485	1.20756e-08	1.8053e-06	0	0	2.55105	46.5109	COL18A1	SERPINA1	TINAGL1	FHL1	PRF1	AATK	LOXL4	FAM110A	RIMS2	RASSF1	PIP5KL1	PRX	PMEPA1	SCARF1	ZNF385A	HES6	AMN	IGFBP3	SERPINF2	LRRC37B	ACAP1	PADI3	PADI2	HOXB3	HOXB8	HOXB7	CUEDC1	ABCG1	SHANK2	HDAC4	EXD3	KRT80	FBLIM1	PDGFB	GBX2	INPP5D	GPC1	MICALL1	PLEKHG4B	SUSD3	HES2	ACBD4
ZNF148 (human)	48/1591	3.3937e-05	0.00338239	0	0	1.99964	20.5783	COL18A1	EXD3	CDKN1A	KRT80	TINAGL1	FBLIM1	KCNC4	FHL1	PDGFB	FAM110A	RIMS2	RASSF1	ATXN1	GBX2	INPP5D	GPC1	PIP5KL1	PRX	HYAL3	MICALL1	SUSD3	PMEPA1	HES2	ZNF385A	AMN	SUSD2	SERPINF2	COBL	SOX12	PRSS33	GRIN2B	LRRC37B	LYRM1	NSFL1C	CDK6	PADI2	HOXB3	SP5	COL9A3	NOTUM	DEGS2	HOXB8
SP1 (human)	43/1406	6.68535e-05	0.0049973	0	0	2.01237	19.3449	MACF1	COL18A1	ANKRD33B	KCNC4	FHL1	AATK	LOXL4	KLHDC7A	IRS2	SLC1A4	RIMS2	ATXN1	GPC1	SESN1	PIP5KL1	PDGFC	CYP1B1	SH3BP4	RGS20	SOX8	HES2	HES6	ACBD4	TSC22D1	KCNB1	SUSD2	SAMD4A	SLC4A11	COBL	SOX12	WNT9A	HSPG2	MSH6	ARL4C	ALDH1A3	BCL2	SP5	COL9A3	RBCK1	NOTUM	SGK1	CRLF1
GLI2 (human)	43/1465	0.000167097	0.0099924	0	0	1.92266	16.7212	KRT80	CAMK2D	TINAGL1	COL13A1	DCUN1D3	INSIG1	FHL1	IRS2	SLC1A4	SLC5A1	GATA2	RASSF1	HYAL1	INPP5D	PIP5KL1	PRX	MICALL1	SUSD3	SOX8	SCARF1	HES2	PARP3	AMN	GADD45B	KCNB1	SUSD2	KRT13	KRT32	AXIN2	PRSS33	CRLS1	ACTA2	NSFL1C	PTPRA	ZFAT	PADI2	HOXB3	SP5	HOXB7	CUEDC1	ABCG1	HOXB5
ZBTB7A (human)	40/1373	0.000333455	0.0166172	0	0	1.89741	15.1906	HDAC4	COL18A1	CDKN1A	PDGFB	SECTM1	GATA2	MALT1	RIMS2	NEURL1B	RASSF1	GBX2	FGF9	PIP5KL1	PDGFC	HYAL3	MICALL1	PMEPA1	SOX8	MAN1A1	DRD1	FSD1	HES2	HES6	PARP3	ACBD4	APOBEC3H	WNT3A	FN1	SAMD4A	SLC4A11	NRG1	F3	MSH6	ALDH1A3	CDK6	MLPH	PTPRA	BCL2	DEGS2	CRLF1
CACYBP (human)	39/1350	0.000468229	0.0200001	0	0	1.8768	14.3886	KRT80	FBLIM1	FHL1	AATK	PRSS23	RIMS2	DDRGK1	INPP5D	GPC1	PIP5KL1	PRX	HYAL3	MICALL1	CYP1B1	SUSD3	SOX8	HES2	AMN	APOBEC3F	ACBD4	APOBEC3G	GADD45B	WNT3A	SERPINF2	PRSS33	LRRC37B	PARP10	NSFL1C	PTPRA	ZFAT	CYP1A1	BCL2	PADI2	COL9A3	HOXB7	RAMP1	SERINC2	CUEDC1	ITPA
PCBP1 (human)	39/1360	0.000540012	0.020183	0	0	1.86158	14.0064	MACF1	COL18A1	ANKRD33B	KCNC4	LOXL4	IRS2	SLC1A4	RIMS2	ATXN1	GPC1	SESN1	PIP5KL1	PDGFC	CYP1B1	SH3BP4	RGS20	SOX8	HES2	HES6	ACBD4	TSC22D1	KCNB1	SUSD2	SAMD4A	SLC4A11	COBL	SOX12	HSPG2	MSH6	ARL4C	ALDH1A3	BCL2	SP5	CSPG5	COL9A3	RBCK1	NOTUM	DEGS2	CRLF1
SP3 (human)	38/1332	0.000702772	0.0233476	0	0	1.84807	13.4178	HDAC4	MACF1	COL18A1	ANKRD33B	KCNC4	FHL1	LOXL4	IRS2	RIMS2	GPC1	SESN1	PIP5KL1	CYP1B1	SH3BP4	SOX8	HES2	HES6	ACBD4	KCNB1	WNT3A	SUSD2	SAMD4A	SLC4A11	COBL	SOX12	WNT9A	HSPG2	MSH6	ARL4C	BCL2	SP5	COL9A3	RBCK1	NOTUM	DEGS2	SGK1	SERINC2	CRLF1
SMAD3 (mouse)	6/72	0.00120713	0.0360931	0	0	5.50056	36.9611	COL18A1	HYAL1	HOXB3	RPS27L	SUSD3	TGM2
MSigDB
Epithelial Mesenchymal Transition	17/200	3.95077e-08	1.61982e-06	0	0	5.7836	98.5917	GADD45B	IGFBP3	ITGA2	COL12A1	LAMA3	FN1	LOXL2	ACTA2	VCAN	GPC1	FAS	PMEPA1	CCN2	VIM	CRLF1	SNTB1	TGM2
p53 Pathway	15/200	1.24585e-06	2.55398e-05	0	0	5.01544	68.1885	CDKN1A	BTG2	TSC22D1	PLK2	RPS27L	DDB2	ZFP36L1	SESN1	TNFSF9	FAS	TRIB3	NUPR1	IER5	ZNF365	PHLDA3
TNF-alpha Signaling via NF-kB	13/200	2.95576e-05	0.000302965	0	0	4.27266	44.5603	BTG2	CDKN1A	EDN1	GADD45B	TSC22D1	TIPARP	PLK2	IRS2	F3	TNFSF9	PMEPA1	SGK1	IER5
Hypoxia	13/200	2.95576e-05	0.000302965	0	0	4.27266	44.5603	CA12	CDKN1A	TIPARP	IGFBP3	PDGFB	IRS2	F3	ETS1	HOXB9	GPC1	BCL2	CCN2	TGM2
Estrogen Response Early	10/200	0.00185682	0.0152259	0	0	3.20395	20.1493	CA12	MLPH	TIPARP	KRT15	KRT13	BCL2	SLC1A4	PRSS23	THSD4	TGM2
Apoptosis	8/161	0.00536308	0.0366477	0	0	3.16924	16.5695	DAP	CDKN1A	BTG2	GADD45B	FEZ1	PRF1	EMP1	FAS
Androgen Response	6/100	0.00628139	0.036791	0	0	3.85658	19.5535	ALDH1A3	CDK6	TSC22D1	INSIG1	PMEPA1	SGK1
GO BP
regulation of cell population proliferation (GO:0042127)	34/764	1.64792e-07	0.000192688	0	0	2.98019	46.5464	HDAC4	COL18A1	CDKN1A	BTG2	PDGFB	IRS2	IFI35	PTPRK	ETS1	ZFP36L1	FGF9	DDRGK1	PDGFC	TP53INP1	CYP1B1	SH3BP4	IER5	EDN1	FGFBP1	CSNK2A1	WNT3A	IGFBP3	FN1	NRG1	WNT9A	AXIN2	CLDN3	CDK6	BCL2	NUPR1	MELTF	SGK1	CRLF1	SHANK2
collagen fibril organization (GO:0030199)	11/89	2.42577e-07	0.000192688	0	0	8.66136	131.929	COL17A1	COL18A1	ADAMTS14	COL13A1	COL12A1	SERPINF2	LAMA3	LOXL4	CYP1B1	COL9A3	LOXL2
negative regulation of cellular process (GO:0048523)	28/566	2.65654e-07	0.000192688	0	0	3.29708	49.9213	COL18A1	CDKN1A	BTG2	DCUN1D3	FHL1	IFI35	PTPRK	ETS1	HYAL1	TP53INP1	CYP1B1	SH3BP4	CCN2	APOBEC3C	FGFBP1	APOBEC3F	APOBEC3G	APOBEC3H	SUSD2	IGFBP3	WNT9A	AXIN2	WNT16	CLDN3	CDK6	MYL2	BCL2	NUPR1
extracellular matrix organization (GO:0030198)	18/300	2.77988e-06	0.00151225	0	0	3.96645	50.7432	COL17A1	COL18A1	COL13A1	ITGA2	COL12A1	SERPINF2	LAMA3	KLK5	PDGFB	FN1	LOXL4	HSPG2	THSD4	LOXL2	ADAMTS14	VCAN	CYP1B1	COL9A3
DNA cytosine deamination (GO:0070383)	4/9	8.59023e-06	0.00321939	0	0	48.2577	562.92	APOBEC3C	APOBEC3F	APOBEC3G	APOBEC3H
anterior/posterior pattern specification (GO:0009952)	8/63	8.877e-06	0.00321939	0	0	8.86053	103.066	HES6	HOXB9	HOXB4	HOXB3	HOXB7	HES2	HOXB6	HOXB5
positive regulation of cellular process (GO:0048522)	26/625	1.63791e-05	0.00509155	0	0	2.72299	30.006	HDAC4	PDGFB	IRS2	GATA2	ETS1	ZFP36L1	FGF9	HYAL1	DDRGK1	PDGFC	CCN2	IER5	TGM2	TNFSF18	EDN1	CSNK2A1	WNT3A	SERPINF2	FN1	NRG1	AXIN2	FKBP1B	BCL2	NUPR1	CRLF1	SHANK2
cytidine to uridine editing (GO:0016554)	4/11	2.1917e-05	0.00596143	0	0	34.4663	369.763	APOBEC3C	APOBEC3F	APOBEC3G	APOBEC3H
histone citrullination (GO:0036414)	3/5	4.34334e-05	0.00915133	0	0	90.2202	906.197	PADI3	PADI2	PADI1
protein citrullination (GO:0018101)	3/5	4.34334e-05	0.00915133	0	0	90.2202	906.197	PADI3	PADI2	PADI1
DNA deamination (GO:0045006)	4/13	4.62613e-05	0.00915133	0	0	26.8044	267.54	APOBEC3C	APOBEC3F	APOBEC3G	APOBEC3H
negative regulation of cell population proliferation (GO:0008285)	18/379	6.44303e-05	0.0116834	0	0	3.08582	29.7779	COL18A1	CDKN1A	BTG2	FGFBP1	IGFBP3	IFI35	PTPRK	WNT9A	AXIN2	GATA2	ETS1	PARP10	CLDN3	CDK6	TP53INP1	CYP1B1	SH3BP4	NUPR1
positive regulation of fibroblast proliferation (GO:0048146)	5/28	8.53451e-05	0.0133731	0	0	13.1418	123.123	CDKN1A	CDK6	PDGFC	PDGFB	FN1
negative regulation of single stranded viral RNA replication via double stranded DNA intermediate (GO:0045869)	4/15	8.604e-05	0.0133731	0	0	21.9286	205.267	APOBEC3C	APOBEC3F	APOBEC3G	APOBEC3H
regulation of fibroblast proliferation (GO:0048145)	6/46	0.000103565	0.0150238	0	0	9.08796	83.3849	PARP10	CDKN1A	CDK6	PDGFC	PDGFB	FN1
positive regulation of intracellular signal transduction (GO:1902533)	22/546	0.000117234	0.0159438	0	0	2.60987	23.6228	GDF15	PLK2	PDGFB	FN1	SECTM1	IRS2	NRG1	IFI35	ADRB2	WNT16	F3	MALT1	FKBP1A	FGF9	PDGFC	BCL2	TRIB3	RBCK1	NUPR1	ZCCHC3	TRIM22	TGM2
positive regulation of blood vessel endothelial cell migration (GO:0043536)	6/48	0.000131978	0.0168932	0	0	8.65432	77.308	ANGPT4	FGFBP1	SRPX2	PDGFB	GATA2	ETS1
base conversion or substitution editing (GO:0016553)	4/18	0.000185479	0.0212311	0	0	17.227	148.024	APOBEC3C	APOBEC3F	APOBEC3G	APOBEC3H
regulation of single stranded viral RNA replication via double stranded DNA intermediate (GO:0045091)	4/18	0.000185479	0.0212311	0	0	17.227	148.024	APOBEC3C	APOBEC3F	APOBEC3G	APOBEC3H
regulation of lymphocyte proliferation (GO:0050670)	4/19	0.000231898	0.0212311	0	0	16.0777	134.558	TNFSF18	TNFSF9	AHR	CD22
cellular response to UV-B (GO:0071493)	3/8	0.000234411	0.0212311	0	0	36.0826	301.594	CDKN1A	HYAL1	HYAL3
cell-matrix adhesion (GO:0007160)	8/100	0.000251698	0.0212311	0	0	5.28706	43.8154	COL17A1	CD96	FERMT1	COL13A1	ITGA2	FN1	PTPRK	L1CAM
embryonic skeletal system development (GO:0048706)	5/35	0.000256475	0.0212311	0	0	10.0718	83.2784	HOXB9	HOXB4	HOXB3	WNT9A	SULF2
negative regulation of cell cycle G1/S phase transition (GO:1902807)	5/35	0.000256475	0.0212311	0	0	10.0718	83.2784	CDKN1A	CDK6	DCUN1D3	SUSD2	FHL1
supramolecular fiber organization (GO:0097435)	16/351	0.000259376	0.0212311	0	0	2.94096	24.2842	COL17A1	COL18A1	COL13A1	COL12A1	SERPINF2	LAMA3	LOXL4	HSPG2	RND3	LOXL2	FKBP1A	ADAMTS14	CYP1B1	COL9A3	FSD1	VIM
extracellular structure organization (GO:0043062)	12/216	0.000261882	0.0212311	0	0	3.60081	29.6981	COL17A1	COL18A1	ADAMTS14	VCAN	COL13A1	ITGA2	LAMA3	PDGFB	FN1	COL9A3	HSPG2	THSD4
regulation of cell growth (GO:0001558)	12/217	0.000273194	0.0212311	0	0	3.58306	29.4002	CDKN1A	CEACAM1	CAMK2D	CSNK2A1	HYAL1	MYL2	DCUN1D3	FHL1	BCL2	SH3BP4	MELTF	SGK1
external encapsulating structure organization (GO:0045229)	12/217	0.000273194	0.0212311	0	0	3.58306	29.4002	COL17A1	COL18A1	ADAMTS14	VCAN	COL13A1	ITGA2	LAMA3	PDGFB	FN1	COL9A3	HSPG2	THSD4
glycosaminoglycan catabolic process (GO:0006027)	6/56	0.000312658	0.0234601	0	0	7.26667	58.6449	VCAN	HYAL1	GPC1	HYAL3	CSPG5	HSPG2
regulation of transposition (GO:0010528)	4/21	0.000348874	0.025305	0	0	14.1848	112.922	APOBEC3C	APOBEC3F	APOBEC3G	APOBEC3H
positive regulation of cell population proliferation (GO:0008284)	19/474	0.000362376	0.0254364	0	0	2.58001	20.441	HDAC4	CDKN1A	EDN1	CSNK2A1	WNT3A	SERPINF2	PDGFB	FN1	IRS2	NRG1	CDK6	FGF9	HYAL1	DDRGK1	PDGFC	BCL2	SOX8	CRLF1	SHANK2
connective tissue development (GO:0061448)	5/38	0.000380841	0.0258972	0	0	9.15478	72.0767	DDRGK1	HYAL1	HYAL3	SOX8	SULF2
epidermis development (GO:0008544)	7/83	0.000443483	0.029243	0	0	5.58734	43.139	COL17A1	KRT15	LAMA3	KLK5	EMP1	CCN2	KRT32
regulation of cell migration (GO:0030334)	17/408	0.000474552	0.0303713	0	0	2.67801	20.4952	MACF1	EDN1	SEMA3C	SEMA3A	PDGFB	PTPRK	F3	CEACAM1	CLDN3	FGF9	DDRGK1	PIP5KL1	PDGFC	TP53INP1	CYP1B1	DRD1	SGK1
positive regulation of cell migration (GO:0030335)	13/269	0.000561678	0.0349203	0	0	3.10999	23.277	TNFSF18	EDN1	SEMA3C	SEMA3A	PDGFB	FN1	F3	FERMT1	CLDN3	HYAL1	DDRGK1	PDGFC	DRD1
axon guidance (GO:0007411)	11/203	0.000577793	0.0349244	0	0	3.4982	26.0836	DRAXIN	SEMA3C	PTPRA	FEZ1	GPC1	SEMA3A	LAMA3	IRS2	L1CAM	GLI2	RNF165
axonogenesis (GO:0007409)	12/240	0.000674414	0.0396629	0	0	3.21781	23.4954	DRAXIN	SEMA3C	PTPRA	FEZ1	MAP1B	GPC1	SEMA3A	LAMA3	ULK2	IRS2	L1CAM	GLI2
negative regulation of transposition (GO:0010529)	4/26	0.000816632	0.0467629	0	0	10.9582	77.9161	APOBEC3C	APOBEC3F	APOBEC3G	APOBEC3H
protein mono-ADP-ribosylation (GO:0140289)	3/12	0.000876781	0.0467952	0	0	20.0418	141.079	PARP10	PARP3	TIPARP
protein auto-ADP-ribosylation (GO:0070213)	3/12	0.000876781	0.0467952	0	0	20.0418	141.079	PARP10	PARP3	TIPARP
cellular response to organic cyclic compound (GO:0071407)	9/150	0.00088171	0.0467952	0	0	3.88328	27.3136	TIPARP	INSIG1	PDGFB	CYP1A1	CYP1B1	AHR	DRD1	TGM2	ZFP36L1
GO CC
collagen-containing extracellular matrix (GO:0062023)	24/380	2.262e-08	3.43824e-06	0	0	4.25512	74.909	COL17A1	COL18A1	ANGPT4	SERPINA1	TINAGL1	ANGPT2	COL13A1	GDF15	COL12A1	SERPINF2	LAMA3	PDGFB	FN1	L1CAM	HSPG2	F3	THSD4	LOXL2	VCAN	SRPX2	GPC1	COL9A3	CCN2	TGM2
endoplasmic reticulum lumen (GO:0005788)	16/285	2.26579e-05	0.001722	0	0	3.67504	39.3046	COL17A1	COL18A1	SERPINA1	COL13A1	WNT3A	IGFBP3	COL12A1	PDGFB	FN1	PRSS23	VCAN	ARSJ	PDGFC	COL9A3	NOTUM	MELTF
intermediate filament cytoskeleton (GO:0045111)	1984-08-01	7.40412e-05	0.00375142	0	0	6.40536	60.9207	MACF1	NSFL1C	SYNM	KRT80	KRT13	KRT7	SLC1A4	VIM
intermediate filament (GO:0005882)	1950-06-01	0.00016624	0.00631714	0	0	8.2601	71.88	MACF1	SYNM	KRT13	KRT7	SLC1A4	VIM
Hct116
Downregulated in Fbw7-/-
TRANSFAC & JASPAR	Overlap	P-value	Adjusted P-value	Old P-value	Old Adjusted P-value	Odds Ratio	Combined Score	Genes
TCFAP2A (human)	93/1367	3.48517e-09	1.02116e-06	0	0	2.06565	40.228	DGKD	EIF4E3	HIP1	ACAA2	CHPF	IRS1	NAB1	RAPH1	BHLHE41	PTPRM	BMI1	TMEM92	PITPNC1	NR3C2	PREX1	ADAMTS2	CSRP2	RBPMS2	HOXA1	PHLDA2	ZNF566	JUNB	CGNL1	SAMD11	TGIF1	KLF10	KCNH3	CARD10	KCND3	GRID1	FIBCD1	BHLHA15	FOS	EML1	PARP8	CCNE2	RTN4RL1	ESRP1	ZNF516	PKP2	PPARG	EZR
POU2F2 (human)	139/2792	6.08724e-05	0.0089178	0	0	1.47572	14.3244	C11ORF74	ZNF573	PROS1	CLGN	SLC25A48	RGS2	ARHGAP40	MYC	FAM122C	MYB	HOXA3	SLC16A7	HOXA1	KPNA5	ZNF600	PITX2	AZI2	PRKACB	PLS1	ZNF440	MEF2C	SLC15A1	SP110	FBXO16	TMOD2	UBE2E1	WDR72	HNF1B	ANK3	TC2N	CASD1	C6ORF141	FOXP2	OVOL2	BTC	ZNF91	CACNB4	PRKD3	ADPRH	RBP1	TRIM15	FAR2
ZBTB7A (human)	77/1373	0.000103437	0.0101023	0	0	1.63797	15.031	VIPR1	HIP1	ACAA2	CHPF	NAB1	PTPRM	SLC4A3	ELFN2	PTPRG	ZFYVE28	SYDE2	ADAMTS2	PSD2	ZNF83	ZNF845	ACAA1	JUNB	PRKACB	PHLDA1	SAMD11	KLF10	EPHA4	SCARA3	FNBP1	FIBCD1	BHLHA15	FOS	OVOL1	F3	ZDHHC17	TUBA4A	RTN4RL1	PXDN	ZNF516	PRKCQ	EXOC6	PPARG	EZR	RBM24	NGEF	MGLL	ITGA9
TEAD4 (human)	74/1354	0.000307499	0.0225243	0	0	1.58795	12.8418	FHOD3	IFI27L2	DGKD	EIF4E3	IRS1	NAB2	BHLHE41	BMI1	LYL1	2022-03-09	SCML1	RBPMS2	PHLDA2	JUNB	SAMD11	TGIF1	KLF10	NKX2-8	MEF2C	PCYT2	ACSL1	WDR72	BHLHA15	FOS	KSR2	OVOL1	KLF15	PXDN	TRNP1	PKP2	DPEP1	PPARG	EZR	MFGE8	RBM24	FBN3	CACNA1D	GATA3	KIAA0040	PHF21A	ACAT2	TMEM121
CBEPB (human)	125/2598	0.000618103	0.0362208	0	0	1.40574	10.3868	C11ORF74	PROS1	NAB1	ANTXR2	SAT1	CLGN	ZFYVE28	LGALS3	ABHD10	ZNF608	FAM122C	RASSF6	ZNF85	SLC16A9	NEK3	PITX2	PRKACB	ZNF320	MEF2C	FBXO16	MYH15	TMOD2	UBE2E1	ANXA10	ANK3	MAT1A	GABRG2	FOXP2	PRKD3	MALL	TRIM15	ZNF675	TRIM10	INO80C	CALCRL	ZC4H2	NEDD4L	GLT8D2	KLHL13	DDX60	LTBP1	PHF21A
SMAD4 (mouse)	81/1580	0.00110317	0.0461036	0	0	1.48199	10.0917	PLEKHF2	ERRFI1	PHTF2	DGKD	PDE3B	RAPH1	DOC2B	BMI1	HOXA13	CLGN	EEA1	PREX1	LIPE	CFL2	RBPMS2	JAK2	EPHB3	RAG1	DACT1	DUSP5	KCNH3	CARD10	GRID1	UBE2E1	PPP2R5A	CASD1	RUNDC3B	EREG	OLFM1	CCNE2	GLCCI1	MGLL	RNF165	ITGA9	L3MBTL3	CHRD	RHOBTB3	CACNA1D	HMGCR	TRHDE	PHF21A	EHBP1
NR3C1 (human)	81/1590	0.00131932	0.0461036	0	0	1.47134	9.75591	CDA	DGKD	RAPH1	DUSP19	SLC2A1	HOXA13	ABHD10	ADAMTS2	CAPN6	RASSF6	IL12A	ANXA9	PRSS3	PHLDA1	RSPO4	PCDHAC1	CARD10	ACSL1	ACOT11	IL18	PLA2G4A	TMC7	FOS	KSR2	CASD1	EML1	SPTB	PARP8	CACNB4	CDCP1	GAL	PALLD	ADPRH	RRAGD	GPD1	SERPING1	PRKCQ	GAS6	EPHA1	NGEF	GCOM1	SLC45A4
SP1 (human)	73/1406	0.0013953	0.0461036	0	0	1.49749	9.84545	DGKD	EIF4E3	HIP1	CHPF	IRS1	NAB1	NAB2	BHLHE41	BMI1	SCML1	RBPMS2	HOXA1	PHLDA2	ZNF566	JUNB	SAMD11	TGIF1	KLF10	KCNH3	EPHA4	CARD10	WSB2	GRID1	FIBCD1	BHLHA15	OVOL1	ZHX1	ARC	CCNE2	VGF	RTN4RL1	ZNF516	DPEP1	PPARG	GAS6	EZR	RBM24	ARHGEF25	SATB2	CACNA1D	GATA3	C2CD4C
TEAD1 (human)	79/1547	0.00141615	0.0461036	0	0	1.47394	9.66879	C11ORF74	CDA	EIF4E3	CLIC3	DDX60L	MYOM2	C1ORF210	2022-03-09	PSD2	CASP10	ZNF83	RASSF6	ZNF845	TIMP3	ZNF567	NEK3	ZNF566	AZI2	RSPO4	PLS1	EIF2A	TNS1	MEF2C	SP110	ACOT11	TMEM171	OVOL1	F3	ZHX1	KLF15	GABRG2	FOXP2	FOXP1	CDCP1	NR5A2	BDH1	ASPH	ESRP1	PXDN	CMPK2	DPEP1	ZNF117
MSigDB
TNF-alpha Signaling via NF-kB	27/200	4.6188e-09	2.21702e-07	0	0	4.24589	81.4919	SERPINE1	SLC2A3	PTGS2	AREG	TANK	SAT1	MYC	PDE4B	PHLDA2	PDLIM5	JUNB	PHLDA1	KLF10	TGIF1	EGR1	DUSP5	EGR2	EGR3	GFPT2	IL18	FOS	F3	KLF2	NR4A1	ID2	FOSB	MXD1
Estrogen Response Early	26/200	1.97195e-08	4.73267e-07	0	0	4.05914	72.0159	FOXC1	CLIC3	RHOBTB3	SLC2A1	ABAT	AREG	PAPSS2	SLC7A2	MYC	MYB	NRIP1	LRIG1	SH3BP5	ANXA9	JAK2	FDFT1	KLF10	EGR3	SLC37A1	GREB1	FOS	TTC39A	OVOL2	REEP1	OLFM1	FRK
Estrogen Response Late	24/200	3.14746e-07	5.03593e-06	0	0	3.69342	55.2961	ST14	FOXC1	EGR3	CLIC3	CAV1	NAB2	DNAJC12	LAMC2	FOS	AREG	PAPSS2	OVOL2	OLFM1	GAL	ACOX2	CDH1	ID2	MYB	NRIP1	ANXA9	JAK2	LARGE1	FRK	FDFT1
UV Response Dn	18/144	5.20144e-06	6.24173e-05	0	0	3.84669	46.8011	RBPMS	IRS1	BDNF	CAV1	SERPINE1	PTPRM	TFPI	LTBP1	KALRN	F3	SMAD7	SYNE1	TGFBR3	MYC	PPARG	PDLIM5	MET	MGLL
Cholesterol Homeostasis	1974-12-01	1.38631e-05	0.000133086	0	0	5.18532	58.0044	ERRFI1	LGALS3	SQLE	PCYT2	HMGCS1	SC5D	PPARG	HMGCR	ANTXR2	HSD17B7	ACAT2	FDFT1
KRAS Signaling Up	19/200	0.000138031	0.00110425	0	0	2.82243	25.0858	MAP4K1	JUP	GALNT3	GFPT2	IGF2	ANXA10	PTGS2	TFPI	HDAC9	DUSP6	EREG	BTC	AKAP12	TMEM158	ID2	HKDC1	MALL	SPP1	PLEK2
IL-2/STAT5 Signaling	18/199	0.000374536	0.00256825	0	0	2.67012	21.0667	PHTF2	ECM1	IL4R	SPRY4	SLC2A3	IGF2R	HK2	ADAM19	NT5E	CDCP1	SELL	MYC	RRAGD	SPP1	LRIG1	MXD1	PHLDA1	IL18R1
TGF-beta Signaling	1954-08-01	0.000707575	0.00424545	0	0	4.63728	33.6373	TGIF1	KLF10	TGFB1	CDH1	ID2	SERPINE1	JUNB	SMAD7
Hypoxia	17/200	0.0010833	0.00519984	0	0	2.49045	17.0042	ERRFI1	DTNA	CAV1	SERPINE1	SLC2A1	NEDD4L	SLC2A3	FOS	F3	HK2	HS3ST1	AKAP12	KLF7	CSRP2	RRAGD	LARGE1	TMEM45A
Inflammatory Response	17/200	0.0010833	0.00519984	0	0	2.49045	17.0042	IL4R	CALCRL	SERPINE1	IL18	F3	SLC7A2	EREG	TLR1	P2RX7	HRH1	SELL	MYC	PDE4B	ITGB8	MXD1	MET	IL18R1
Apical Surface	1944-06-01	0.00498038	0.0210686	0	0	4.20026	22.2708	CRYBG1	ATP8B1	RTN4RL1	AKAP7	GATA3	MDGA1
Fatty Acid Metabolism	13/158	0.00526715	0.0210686	0	0	2.3949	12.5643	ACAA2	ACSM3	HMGCS1	ACSL1	CPOX	ACSL5	DHCR24	HSD17B7	ACAT2	PTPRG	GPD1	ACAA1	MGLL
Apoptosis	13/161	0.00615488	0.0214334	0	0	2.34598	11.9422	RNASEL	EGR3	CAV1	PLPPR4	IL18	SAT1	IGF2R	EREG	SMAD7	TGFBR3	LGALS3	TIMP3	SC5D
Interferon Gamma Response	15/200	0.00669795	0.0214334	0	0	2.16739	10.8498	IL4R	EIF4E3	SP110	PLA2G4A	IFI35	PTGS2	DDX60	USP18	PDE4B	SERPING1	ST3GAL5	CMPK2	METTL7B	JAK2	HERC6
Complement	15/200	0.00669795	0.0214334	0	0	2.16739	10.8498	CDA	DUSP5	CPM	SERPINE1	PLA2G4A	GATA3	HPCAL4	F3	DUSP6	DPP4	LGALS3	CASP10	SERPING1	PRSS3	JAK2
Interferon Alpha Response	1997-09-01	0.00890753	0.0267226	0	0	2.72486	12.8637	IL4R	SELL	SAMD9	SP110	CMPK2	IFI35	DDX60	USP18	HERC6
UV Response Up	12/158	0.0131183	0.03704	0	0	2.19235	9.5011	CYB5B	OLFM1	NR4A1	GAL	NAT1	DLG4	FOSB	FOS	ACAA1	MAPK8IP2	JUNB	TUBA4A
Pancreas Beta Cells	1940-05-01	0.0145401	0.0387736	0	0	3.79558	16.0585	DPP4	VDR	PDX1	SYT13	NKX6-1
GO BP
regulation of transcription by RNA polymerase II (GO:0006357)	128/2206	5.48836e-08	0.000174859	0	0	1.76214	29.4596	ZNF573	SERPINE1	HOXA13	NR3C2	ZNF608	ZFP30	ZNF607	ZNF83	MYC	ZNF84	MYB	HOXA3	ZNF845	ZNF724	HOXA1	ZNF567	ZNF600	PITX2	ZNF566	JUNB	ZNF320	NKX2-8	ZNF440	MEF2C	SP110	HNF1B	BHLHA15	OVOL1	FOXP2	FOXP1	OVOL2	ZNF91	MAML3	EZR	ZNF675	NEDD4L	BAZ2B	GATA3	PHF21A	MYO6	PRDM16	ZBED2
regulation of transcription, DNA-templated (GO:0006355)	127/2244	2.52522e-07	0.000279286	0	0	1.70943	25.9693	ZNF573	NAB1	NAB2	HOXA13	NR3C2	HMGN5	ZNF608	ZFP30	ZNF607	CDH1	ZNF83	MYC	ZNF84	MYB	ZNF85	HOXA3	ZNF845	ZNF724	HOXA1	ZNF567	ZNF600	PITX2	ZNF566	JUNB	SAMD13	SAMD11	ZNF320	NKX2-8	ZNF440	MEF2C	SP110	HNF1B	BHLHA15	OVOL1	FOXP2	FOXP1	OVOL2	EREG	ZNF91	PRKCQ	ZNF711	ZNF675
cholesterol biosynthetic process (GO:0006695)	1935-10-01	3.12565e-07	0.000279286	0	0	10.7071	160.376	SQLE	ACAA2	HMGCS1	SC5D	MSMO1	DHCR24	HMGCR	HSD17B7	ACAT2	FDFT1
negative regulation of transcription, DNA-templated (GO:0045892)	66/948	3.50642e-07	0.000279286	0	0	2.07549	30.849	ZNF254	NAB1	NAB2	BHLHE41	BMI1	DMBX1	ZNF608	SCML1	MYC	MYB	ZNF724	ZNF566	SAMD13	SAMD11	DACT1	TGIF1	KLF10	ZNF440	MEF2C	ZHX1	FOXP2	FOXP1	EREG	ZNF91	PAX9	ZNF239	PPARG	GAS6	EZR	ZNF675	L3MBTL3	FOXC1	NEDD4L	GATA3	HDAC9	PHF21A	PRDM16	NRIP1	ZBED2	PRAME	APBB1	NKX6-1
sterol biosynthetic process (GO:0016126)	1938-10-01	7.28979e-07	0.000464505	0	0	9.55841	135.076	SQLE	ACAA2	HMGCS1	SC5D	MSMO1	DHCR24	HMGCR	HSD17B7	ACAT2	FDFT1
negative regulation of transcription by RNA polymerase II (GO:0000122)	51/684	1.12123e-06	0.000595372	0	0	2.21481	30.3453	ZNF254	BHLHE41	BMI1	ZNF608	MYC	MYB	ZNF724	ZNF566	DACT1	KLF10	TGIF1	ZNF440	MEF2C	ZHX1	FOXP2	FOXP1	ZNF239	PPARG	EZR	ZNF675	FOXC1	NEDD4L	GATA3	HDAC9	PHF21A	PRDM16	NRIP1	ZBED2	APBB1	NKX6-1	CRYM	FNIP2	SNCA	BCL11A	VDR	CAV1	NR2F1	IGF2	HMGA2	MEIS2	KLF2	BMP6
secondary alcohol biosynthetic process (GO:1902653)	1934-09-01	2.49932e-06	0.00113755	0	0	9.623	124.132	SQLE	ACAA2	HMGCS1	MSMO1	DHCR24	HMGCR	HSD17B7	ACAT2	FDFT1
negative regulation of blood vessel endothelial cell migration (GO:0043537)	1934-08-01	2.34614e-05	0.00868933	0	0	8.21295	87.5513	CARD10	MEF2C	STARD13	ANGPT2	TGFB1	RGCC	JUP	PPARG
positive regulation of transcription by RNA polymerase II (GO:0045944)	58/908	2.45461e-05	0.00868933	0	0	1.87327	19.8847	CSRNP1	SERPINE1	HNF4G	GLI1	MYC	MYB	HOXA1	PITX2	JUNB	KLF10	NKX2-8	MEF2C	IL18	HNF1B	FOS	KLF15	GAL	NR5A2	PPARG	MAML3	MET	RNASEL	FOXC1	SATB2	GATA3	ARNTL2	MYO6	NRIP1	APBB1	NKX6-1	EGR1	ARNT2	EGR2	TGFB1	JUP	VDR	WNT3A	MACC1	NR2F1	EAF2	IGF2	PDX1
regulation of synapse organization (GO:0050807)	2022-07-26	2.97923e-05	0.00949182	0	0	9.82388	102.377	EPHA4	MEF2C	WNT3A	NEDD4	ABHD17C	PDLIM5	MDGA1
axon guidance (GO:0007411)	20/203	5.59439e-05	0.0148987	0	0	2.94234	28.8089	EPHA4	NRP2	BDNF	USP33	PTPRM	LAMC2	SEMA3E	SPTB	NTN1	IGSF9	EFNB2	KLF7	PALLD	CHN1	PRKCQ	EMB	EPHA1	EZR	EPHB3	RNF165
positive regulation of cardiac muscle cell differentiation (GO:2000727)	2022-04-07	5.61158e-05	0.0148987	0	0	35.4354	346.845	EFNB2	MEF2C	TGFB1	WNT3A
negative regulation of muscle cell differentiation (GO:0051148)	2022-04-08	0.000108989	0.0267106	0	0	26.5752	242.479	ID2	IGF2	RBPMS2	EREG
positive regulation of transcription, DNA-templated (GO:0045893)	68/1183	0.000131455	0.0289428	0	0	1.67515	14.9705	CSRNP1	SERPINE1	HNF4G	GLI1	LYL1	HMGN5	CDH1	MYC	MYB	HOXA1	PITX2	JUNB	TEAD2	KLF10	NKX2-8	MEF2C	TESC	IL18	HNF1B	FOS	KLF15	GAL	NR5A2	ZNF516	PPARG	ZNF711	MAML3	MET	RNASEL	FOXC1	SATB2	GATA3	ARNTL2	MYO6	PRDM16	NRIP1	SPP1	APBB1	NKX6-1	EGR1	ARNT2	EGR2
regulation of SMAD protein signal transduction (GO:0060390)	2022-06-23	0.000136266	0.0289428	0	0	9.39907	83.6603	TGFB1	RBPMS	VEPH1	JAK2	BMP6	OVOL2
positive regulation of signal transduction (GO:0009967)	22/252	0.00014741	0.029353	0	0	2.57611	22.7272	KANK1	IRS1	BDNF	CAV2	IGF2	GATA3	GLI1	F3	UCHL5	BMP6	KLF2	TSPAN14	DLG4	TSPAN5	MAML3	JAK2	GAS6	RSPO4	JCAD	SASH1	ATP6V1C2	DACT1
metal ion homeostasis (GO:0055065)	1944-08-01	0.000166017	0.0305695	0	0	5.92849	51.5982	SLC7A8	TRPV6	CAV1	S100A14	ANK3	CYP4F12	LETM2	SNCA
fatty acid metabolic process (GO:0006631)	14/124	0.000172709	0.0305695	0	0	3.41073	29.5502	CYP2J2	PON3	ACSM3	ACSL1	ACOT11	ACSL5	MSMO1	PTGS2	CYP4F12	ACOX2	LIPH	LIPG	PPARG	ACAA1
motor neuron axon guidance (GO:0008045)	2022-05-16	0.000198278	0.0322974	0	0	12.0919	103.094	EPHA4	CHN1	LAMC2	NTN1	RNF165
icosanoid metabolic process (GO:0006690)	1957-09-01	0.000202746	0.0322974	0	0	5.00599	42.5687	CYP2J2	PON3	CYP4F3	FAAH2	PLA2G4A	DPEP1	PTGS2	CYP4F12	MGLL
cellular response to drug (GO:0035690)	2022-06-26	0.000283093	0.0429492	0	0	7.98797	65.2596	MEF2C	MYC	PDE4B	HTR1B	DPEP1	GAS6
positive regulation of cell population proliferation (GO:0008284)	33/474	0.000313052	0.0453356	0	0	2.02449	16.3359	VIPR1	IRS1	CHRD	LAMC2	GLI1	BMI1	AREG	DPP4	EFNB2	HMGN5	MYC	RBPMS2	PRAME	MEF2C	TGFB1	WNT3A	IGF2	IL18	HMGA2	LAMB1	NAP1L1	MEIS3	MEIS2	BMP6	FOXP1	EREG	BTC	TGFBR3	KITLG	BAMBI	ID2	GAS6	EPHA1
negative regulation of endothelial cell proliferation (GO:0001937)	1937-07-01	0.000328991	0.0455724	0	0	6.21824	49.867	MEF2C	RGCC	CAV2	CAV1	PTPRM	IL12A	PPARG
GO CC
*none < Adj.pvalue 0.05
Hct116
Downregulated in Fbw7R/+
TRANSFAC & JASPAR	Overlap	P-value	Adjusted P-value	Old P-value	Old Adjusted P-value	Odds Ratio	Combined Score	Genes
POU2F2 (human)	76/2792	1.17239e-05	0.00324751	0	0	1.81692	20.6291	CNTNAP2	CBWD3	HK2	RERG	SLC25A48	RGS2	ARHGAP40	CASP10	FAM122C	MYB	DPYSL3	FBXO4	HOXA3	EPG5	FBXO8	PRKACB	MEF2C	ZNF680	SYK	PDE4D	ARRDC3	EBF2	WDR72	ANK3	TMC5	C6ORF141	ANK1	SYTL2	OVOL2	ITPKB	NR5A2	CACNB4	PRKD3	PALLD	ADPRH	TRIM15	ZNF780B	KCTD12	MAML3	TRIM10	DYNC1I2	GTF3C4
POU2F1 (human)	44/1399	4.692e-05	0.00616403	0	0	2.02902	20.2234	CNTNAP2	BLM	TIMM9	CBWD3	TMEM74	LIN7A	KLHL13	TANK	SLC7A2	RGS2	ARHGAP40	CASP10	FAM122C	DPYSL3	NRIP1	FBXO4	EPG5	MBNL3	SCN3A	ZNF620	ATF7IP	MEF2C	DTNA	ZNF680	SYK	PDE4D	ARRDC3	KLK13	EBF2	TMC5	CRNKL1	SYTL2	OVOL2	NR4A1	CACNB4	NFIA	SELL	ID2	DLC1	ADPRH	TRIM15	ZNF780B
NFAT2 (human)	43/1376	6.67585e-05	0.00616403	0	0	2.01119	19.3365	DYNC1I2	CALCRL	PODXL2	CD163L1	FRRS1	SATB1	NAA20	HSPB8	RGS16	SLC1A3	GATA3	TANK	SDR16C5	ZNF608	HMGN5	ZMAT1	CAPN6	TNKS2	TTPA	MYB	ST3GAL5	CA8	FBXO8	MBNL3	SCN3A	DTD1	ZNF620	SULT1A2	MEF2C	ZNF680	GK	VDR	RALGAPA2	PDE4D	PLCL2	ANXA10	ANK3	LRP1B	SYTL2	NR4A1	BFSP1	NFIA
BCL6 (human)	42/1399	0.000195555	0.0135422	0	0	1.92062	16.4014	ZNF133	DYNC1I2	CSRNP3	SLC1A3	SEMA3E	KLHL13	IFIH1	SDR16C5	CYTH4	CA2	HNF4A	FAM122C	MYB	ST3GAL5	CA8	MBNL3	BEND7	PRKACB	DTD1	SEC23B	MAGI1	ATF7IP	CGREF1	MEF2C	EGR2	DTNA	GK	RALGAPA2	ARRDC3	PLCL2	ANXA10	NAV2	ZHX1	HS3ST1	ITPKB	NFIA	LYRM4	PRKD3	DLC1	ADPRH	S100A5	ESF1
GATA6 (human)	42/1447	0.000396101	0.021944	0	0	1.85014	14.4937	GALNT14	CSRNP3	CD163L1	NAA20	ABAT	DDX60L	TMEM74	SEMA3E	KLHL13	TRIM9	SDR16C5	HTR7	ERMP1	CYTH4	CASP10	MB	RASSF6	FBXO8	MBNL3	LMCD1	SEC23B	ARRDC4	SUN3	MEF2C	DTNA	ABCA5	PDE4D	SRD5A3	PLCL2	ARID5B	ANXA10	IL17RE	NAV2	SYTL2	NR5A2	FABP6	GAS1	TRIM15	ZNF780B	KCTD12	MAML3	GPR19
MSigDB
TNF-alpha Signaling via NF-kB	17/200	5.35748e-08	2.41087e-06	0	0	5.65505	94.678	EGR1	DUSP5	EGR2	DUSP2	EGR3	DUSP1	FOS	TANK	KLF2	ICAM1	IFIH1	NR4A1	ZFP36	ID2	FOSB	JUNB	IER2
Estrogen Response Late	15/200	1.61664e-06	3.63743e-05	0	0	4.90465	65.4043	DUSP2	EGR3	HOMER2	TNNC1	HSPB8	DNAJC12	FOS	DHRS2	OVOL2	SERPINA5	ZFP36	CA2	ID2	MYB	NRIP1
Estrogen Response Early	13/200	3.67205e-05	0.000550808	0	0	4.17885	42.6751	EGR3	BCL11B	HSPB8	ABAT	FOS	NAV2	DHRS2	SLC7A2	OVOL2	DLC1	MYB	NRIP1	LRIG1
Pancreas Beta Cells	1940-04-01	0.00448711	0.0350097	0	0	6.54888	35.4068	DPP4	VDR	PDX1	SYT13
UV Response Up	8/158	0.00542777	0.0350097	0	0	3.1632	16.5	CDKN1C	NR4A1	HTR7	CA2	FOSB	FOS	JUNB	ICAM1
IL-2/STAT5 Signaling	9/199	0.00678422	0.0350097	0	0	2.81221	14.0418	CDKN1C	SELL	CA2	RGS16	SPRY4	SPP1	LRIG1	IL18R1	HK2
Hypoxia	9/200	0.00700194	0.0350097	0	0	2.79734	13.8792	CDKN1C	KLF7	ZFP36	DTNA	DUSP1	FOS	ANGPTL4	HK2	HS3ST1
Inflammatory Response	9/200	0.00700194	0.0350097	0	0	2.79734	13.8792	P2RX7	CALCRL	SELL	IL1R1	RGS16	OSMR	SLC7A2	IL18R1	ICAM1
KRAS Signaling Up	9/200	0.00700194	0.0350097	0	0	2.79734	13.8792	SATB1	CA2	ID2	HKDC1	RGS16	FBXO4	SPP1	ANXA10	ANGPTL4
GO BP
negative regulation of transcription, DNA-templated (GO:0045892)	36/948	4.84325e-06	0.00599749	0	0	2.45904	30.0935	CDKN1C	ZNF133	L3MBTL3	THRB	SATB1	BHLHE41	TWIST1	ARID4A	GATA3	SDR16C5	ZFP36	ZNF608	SCML1	HNF4A	MYB	PRDM16	NRIP1	APBB1	ZNF620	SAMD11	DACT1	ATF7IP	MEF2C	BCL11A	VDR	NR2F1	ARID5B	DKK1	ZHX1	KLF2	BMP4	KLF7	BRMS1	ID2	FOSB	ZNF675
negative regulation of transcription by RNA polymerase II (GO:0000122)	29/684	5.4897e-06	0.00599749	0	0	2.73239	33.0964	ZNF133	THRB	SATB1	BHLHE41	TWIST1	GATA3	SDR16C5	ZFP36	ZNF608	MYB	PRDM16	NRIP1	APBB1	ZNF620	DACT1	MEF2C	BCL11A	VDR	NR2F1	ARID5B	DKK1	ZHX1	KLF2	BMP4	KLF7	BRMS1	ID2	FOSB	ZNF675
positive regulation of transcription, DNA-templated (GO:0045893)	41/1183	9.52367e-06	0.0069364	0	0	2.24642	25.9725	CDKN1C	CSRNP1	BLM	CSRNP3	THRB	TWIST1	GATA3	SLC9A1	HMGN5	HNF4A	MYB	PRDM16	NRIP1	SPP1	TASP1	APBB1	JUNB	IER2	SNX5	ATF7IP	EGR1	MEF2C	EGR2	BCL11B	VDR	NR2F1	PDX1	FOS	GRHL1	GRHL2	PBX1	KLF2	BMP4	KAT2B	NR4A1	KLF7	NR5A2	FUBP3	NFIA	ID2	MAML3
negative regulation of multicellular organismal process (GO:0051241)	14/214	1.72241e-05	0.00940864	0	0	4.21799	46.268	MEF2C	LAMA4	ARRDC3	PLCL2	GATA3	SMAD6	DKK1	GRHL2	OVOL2	BMP4	KLF7	RGS2	ARHGDIB	IL18R1
regulation of transcription, DNA-templated (GO:0006355)	63/2244	3.16057e-05	0.0138117	0	0	1.843	19.0975	CDKN1C	ZNF133	CSRNP1	CSRNP3	BHLHE41	ARID4A	ZNF608	SCML1	HMGN5	HNF4A	MYB	HOXA3	ZNF525	JUNB	SAMD11	MEF2C	ZNF680	EBF2	ARID5B	FOS	ZHX1	OVOL2	NR5A2	BRMS1	PRKCQ	ZNF117	ZNF780B	ZNF675	L3MBTL3	BLM	SATB1	TWIST1	GATA3	PRDM16	SPP1	TASP1	APBB1	ZNF467	ZNF620	SNX5	ATF7IP	EGR1
positive regulation of transcription by RNA polymerase II (GO:0045944)	32/908	7.05794e-05	0.0257027	0	0	2.25011	21.5083	CSRNP1	CSRNP3	THRB	TWIST1	GATA3	SLC9A1	HNF4A	MYB	NRIP1	APBB1	JUNB	IER2	EGR1	MEF2C	EGR2	BCL11B	VDR	NR2F1	PDX1	FOS	GRHL1	GRHL2	PBX1	KLF2	BMP4	KAT2B	NR4A1	KLF7	NR5A2	FUBP3	NFIA	MAML3
endoderm development (GO:0007492)	2022-04-15	9.33214e-05	0.0291296	0	0	21.46	199.137	DUSP5	DUSP2	DUSP1	KIF16B
positive regulation of nucleic acid-templated transcription (GO:1903508)	21/511	0.000170416	0.046545	0	0	2.60032	22.5636	CDKN1C	ATF7IP	EGR1	MEF2C	EGR2	BLM	GATA3	FOS	KLF2	BMP4	NR5A2	HMGN5	FUBP3	ID2	HNF4A	MYB	PRDM16	SPP1	TASP1	APBB1	SNX5
GO CC
*none < Adj.pvalue 0.05
[truncated: 124 more columns]

## Sheet: Summary - Enrichr Output
Gene set	TRANSFAC & JASPAR		MSigDB		GO BP		GO CC
Upregulated in Hct116 Fbw7-/-	KLF11 (human)	1.09126e-13	p53 Pathway	1.47e-08	regulation of cell migration (GO:0030334)	0.000305	collagen-containing extracellular matrix (GO:0062023)	6.25e-06
	NFE2 (human)	1.15685e-07	Epithelial Mesenchymal Transition	3.55e-05	DNA cytosine deamination (GO:0070383)	0.000305	MHC class II protein complex (GO:0042613)	0.000373
	SP3 (human)	2.70591e-05	Estrogen Response Early	0.00157793	myelination (GO:0042552)	0.000675743	intermediate filament (GO:0005882)	0.00428759
	SNAI2 (human)	0.0197751	KRAS Signaling Dn	0.00157793	negative regulation of cell population proliferation (GO:0008285)	0.000932536	integral component of plasma membrane (GO:0005887)	0.0134892
	JUN (human)	0.0383058	Coagulation	0.00479652	extracellular matrix organization (GO:0030198)	0.000996325	lysosome (GO:0005764)	0.0197207
			Myogenesis	0.00860342	embryonic skeletal system development (GO:0048706)	0.0011665	P-body (GO:0000932)	0.0392002
			Hypoxia	0.0138513	polyol transport (GO:0015791)	0.00731102	sarcolemma (GO:0042383)	0.0392002
			KRAS Signaling Up	0.0138513	epidermis development (GO:0008544)	0.00829014
			Inflammatory Response	0.030195	cAMP-mediated signaling (GO:0019933)	0.0284783
					protein citrullination (GO:0018101)	0.0461481
Upregulated in Fbw7R/+	KLF11 (human)	9.24449e-07	Epithelial Mesenchymal Transition	1.61982e-06	regulation of cell population proliferation (GO:0042127)	0.000192688	collagen-containing extracellular matrix (GO:0062023)	3.43824e-06
	SP1 (human)	0.0049973	p53 Pathway	2.55398e-05	extracellular matrix organization (GO:0030198)	0.00151225	intermediate filament cytoskeleton (GO:0045111)	0.00375142
	ZBTB7A (human)	0.0166172	Hypoxia	0.000302965	DNA cytosine deamination (GO:0070383)	0.00321939
			Estrogen Response Early	0.0152259	protein citrullination (GO:0018101)	0.00915133
			Apoptosis	0.0366477	positive regulation of blood vessel endothelial cell migration (GO:0043536)	0.0168932
			Androgen Response	0.036791	cell-matrix adhesion (GO:0007160)	0.0212311
					embryonic skeletal system development (GO:0048706)	0.0212311
					negative regulation of cell cycle G1/S phase transition (GO:1902807)	0.0212311
					epidermis development (GO:0008544)	0.029243
					regulation of cell migration (GO:0030334)	0.0303713
					axon guidance (GO:0007411)	0.0349244
					protein mono-ADP-ribosylation (GO:0140289)	0.0467952
					cellular response to organic cyclic compound (GO:0071407)	0.0467952
Downregulated in Fbw7-/- Hct116	TCFAP2A (human)		TNF-alpha Signaling via NF-kB		regulation of transcription by RNA polymerase II (GO:0006357)
	POU2F2 (human)		Estrogen Response Early		cholesterol biosynthetic process (GO:0006695)
	CBEPB (human)		UV Response Dn		negative regulation of blood vessel endothelial cell migration (GO:0043537)
	NR3C1 (human)		Cholesterol Homeostasis		regulation of synapse organization (GO:0050807)
	TEAD1 (human)		KRAS Signaling Up		axon guidance (GO:0007411)
			Hypoxia		negative regulation of muscle cell differentiation (GO:0051148)
			Inflammatory Response		regulation of SMAD protein signal transduction (GO:0060390)
			Apical Surface		positive regulation of signal transduction (GO:0009967)
			Fatty Acid Metabolism		metal ion homeostasis (GO:0055065)
			Apoptosis		fatty acid metabolic process (GO:0006631)
			Interferon Gamma Response		icosanoid metabolic process (GO:0006690)
			Complement		cellular response to drug (GO:0035690)
			UV Response Up		positive regulation of cell population proliferation (GO:0008284)
			Pancreas Beta Cells		negative regulation of endothelial cell proliferation (GO:0001937)
Downregulated in Fbw7R/+ Hct116	POU2F2 (human)		TNF-alpha Signaling via NF-kB		negative regulation of transcription by RNA polymerase II (GO:0000122)
			Estrogen Response Late		negative regulation of multicellular organismal process (GO:0051241)
			Pancreas Beta Cells		endoderm development (GO:0007492)
			IL-2/STAT5 Signaling
			Hypoxia
			Inflammatory Response
			KRAS Signaling Up
