# Supplementary material for: Global and context-specific transcriptional consequences of oncogenic Fbw7 mutations
Source: eLife. 2022 Feb 28;11:e74338. doi: 10.7554/eLife.74338 (PMC8926403; doi:10.7554/eLife.74338)
Supplement: Figure 2—source data 1. — This Excel file includes lists of peaks with increased and decreased H3K27ac signal in Hct116 Fbw7−/− and Fbw7R/+ relative to WT. Fold change and FDR listed for each peak. WT, wild-type. [file elife-74338-fig2-data1.xlsx]

## Sheet: H3K27ac increased in Fbw7-Del
Peakid	Chr	Start	End	Length	logFC	logCPM	PValue	FDR
chr6:72185777:72193683	chr6	72185777	72193683	7907	4.77353	7.327	1.28291e-22	2.61109e-18
chr6:73770332:73775685	chr6	73770332	73775685	5354	5.36132	6.71275	2.41813e-22	2.61109e-18
chr1:164714426:164725881	chr1	164714426	164725881	11456	3.30921	8.37434	5.91903e-22	3.31614e-18
chr12:63094307:63099341	chr12	63094307	63099341	5035	3.29727	7.11259	1.5951e-21	7.14924e-18
chr6:73661684:73665152	chr6	73661684	73665152	3469	5.17939	5.96384	7.17594e-21	2.01016e-17
chr8:105210454:105215030	chr8	105210454	105215030	4577	3.4999	7.06188	1.84215e-20	4.58696e-17
chr1:164738635:164745769	chr1	164738635	164745769	7135	2.72396	7.17238	8.91095e-20	1.99694e-16
chr12:19951573:19954812	chr12	19951573	19954812	3240	3.78604	6.11719	1.65886e-19	3.09792e-16
chrX:140498377:140502687	chrX	140498377	140502687	4311	4.22066	6.06085	2.5331e-19	4.36667e-16
chr6:72092912:72123718	chr6	72092912	72123718	30807	4.52342	9.60691	4.35659e-19	6.97366e-16
chr12:63177520:63183439	chr12	63177520	63183439	5920	2.7755	7.03073	6.34595e-19	9.48084e-16
chr8:121824076:121828049	chr8	121824076	121828049	3974	3.22623	6.24791	9.3039e-19	1.30313e-15
chr5:52021110:52024572	chr5	52021110	52024572	3463	4.25242	5.59939	1.01883e-18	1.30638e-15
chr1:164748919:164751963	chr1	164748919	164751963	3045	3.7003	5.8285	1.31793e-18	1.55447e-15
chr1:235564302:235569568	chr1	235564302	235569568	5267	2.87692	6.65275	2.08961e-18	2.22991e-15
chr6:72198730:72202372	chr6	72198730	72202372	3643	3.75055	6.00424	2.00858e-18	2.22991e-15
chr12:63121867:63128989	chr12	63121867	63128989	7123	2.16759	7.8607	3.07399e-18	3.00067e-15
chr1:164605533:164611400	chr1	164605533	164611400	5868	2.56799	6.64908	6.31274e-18	5.4411e-15
chr5:58420667:58424542	chr5	58420667	58424542	3876	2.81227	6.33923	6.22625e-18	5.4411e-15
chr14:102743309:102750462	chr14	102743309	102750462	7154	2.35811	7.18515	1.16965e-17	9.36139e-15
chr1:192526004:192530907	chr1	192526004	192530907	4904	2.40048	6.92431	1.43444e-17	1.10848e-14
chr8:121784251:121794542	chr8	121784251	121794542	10292	3.08284	7.37484	2.90693e-17	2.17148e-14
chr7:93542629:93546772	chr7	93542629	93546772	4144	2.6696	6.24667	4.70282e-17	3.39968e-14
chr17:66230638:66232309	chr17	66230638	66232309	1672	3.27958	5.62809	5.14648e-17	3.60414e-14
chr13:97976637:97981881	chr13	97976637	97981881	5245	2.03981	7.6395	6.01145e-17	4.08232e-14
chr3:30335106:30336965	chr3	30335106	30336965	1860	4.17402	5.08279	6.49457e-17	4.28068e-14
chr6:73818797:73820958	chr6	73818797	73820958	2162	4.79619	4.9138	7.10965e-17	4.42576e-14
chr17:66339833:66341817	chr17	66339833	66341817	1985	3.57296	5.60809	7.8686e-17	4.76582e-14
chr3:62906190:62909724	chr3	62906190	62909724	3535	3.34312	5.86818	1.04084e-16	6.1382e-14
chr7:93538719:93541761	chr7	93538719	93541761	3043	3.03009	5.73504	1.14976e-16	6.60672e-14
chr17:66363177:66366442	chr17	66363177	66366442	3266	2.47609	6.13464	1.28054e-16	6.83258e-14
chr2:235242193:235245658	chr2	235242193	235245658	3466	3.94972	5.20886	1.40618e-16	7.16194e-14
chr1:192518012:192521470	chr1	192518012	192521470	3459	3.56983	6.22208	1.49442e-16	7.44221e-14
chr8:105186749:105189115	chr8	105186749	105189115	2367	3.27318	5.87795	1.74586e-16	8.50537e-14
chr8:121754070:121757983	chr8	121754070	121757983	3914	2.89918	6.10087	2.7e-16	1.28738e-13
chr16:71546650:71549341	chr16	71546650	71549341	2692	3.33396	5.68026	2.91507e-16	1.36098e-13
chr6:45573937:45577822	chr6	45573937	45577822	3886	3.23843	5.6555	3.74682e-16	1.7136e-13
chr8:122174495:122178032	chr8	122174495	122178032	3538	2.72036	5.97785	4.32631e-16	1.93905e-13
chr4:40673704:40677478	chr4	40673704	40677478	3775	2.29061	6.69813	4.61983e-16	1.99097e-13
chr7:111570553:111572709	chr7	111570553	111572709	2157	3.17985	5.31638	4.60943e-16	1.99097e-13
chr12:26162771:26165478	chr12	26162771	26165478	2708	2.71301	5.91985	4.87882e-16	2.06291e-13
chr1:192497897:192500574	chr1	192497897	192500574	2678	2.96785	5.5656	5.00938e-16	2.07889e-13
chr21:44083474:44086096	chr21	44083474	44086096	2623	4.16395	4.92746	5.71019e-16	2.2851e-13
chr3:30333318:30334951	chr3	30333318	30334951	1634	3.70394	5.04114	7.57873e-16	2.78425e-13
chr2:235600628:235604307	chr2	235600628	235604307	3680	2.49514	6.22818	8.33503e-16	3.01271e-13
chr16:20920132:20926210	chr16	20920132	20926210	6079	1.87383	7.06873	8.96065e-16	3.18743e-13
chr2:19695722:19698364	chr2	19695722	19698364	2643	3.8393	5.27481	9.27705e-16	3.24842e-13
chr5:36634890:36638680	chr5	36634890	36638680	3791	2.29675	6.22783	9.67269e-16	3.33485e-13
chr1:164675094:164677917	chr1	164675094	164677917	2824	3.21461	5.52083	1.10412e-15	3.74897e-13
chr4:31235063:31241749	chr4	31235063	31241749	6687	1.9953	7.51543	1.81129e-15	5.96926e-13
chr7:17133640:17136403	chr7	17133640	17136403	2764	2.64598	5.74976	2.03302e-15	6.57483e-13
chr7:157111953:157113833	chr7	157111953	157113833	1881	4.52668	4.9832	2.05372e-15	6.57483e-13
chr2:15813602:15815942	chr2	15813602	15815942	2341	3.55764	5.25022	2.18367e-15	6.84692e-13
chrX:132324546:132327083	chrX	132324546	132327083	2538	3.06001	5.30359	2.19981e-15	6.84692e-13
chr8:122165625:122168645	chr8	122165625	122168645	3021	2.43417	5.75915	2.36499e-15	7.2602e-13
chr17:39555632:39562641	chr17	39555632	39562641	7010	1.71493	7.48325	2.73774e-15	8.29092e-13
chr3:125915472:125917824	chr3	125915472	125917824	2353	3.28005	5.20233	2.85693e-15	8.5365e-13
chr6:73793180:73796571	chr6	73793180	73796571	3392	4.89988	5.98569	3.39958e-15	9.95843e-13
chr6:14731698:14737055	chr6	14731698	14737055	5358	1.86757	7.31475	3.55395e-15	1.02108e-12
chr1:192507907:192510621	chr1	192507907	192510621	2715	2.49792	5.87667	3.6894e-15	1.04658e-12
chr2:19687275:19690196	chr2	19687275	19690196	2922	2.33969	6.20475	3.75028e-15	1.05055e-12
chr5:52004842:52007973	chr5	52004842	52007973	3132	3.15953	5.40551	3.86443e-15	1.06916e-12
chr9:18392265:18394915	chr9	18392265	18394915	2651	3.13689	5.1503	3.9928e-15	1.0912e-12
chr2:235157834:235161096	chr2	235157834	235161096	3263	2.77137	5.69178	4.14826e-15	1.12003e-12
chr6:168250039:168252764	chr6	168250039	168252764	2726	2.0895	6.1936	5.58787e-15	1.44195e-12
chr16:10964318:10966354	chr16	10964318	10966354	2037	3.01006	5.23059	5.7603e-15	1.46691e-12
chr12:44975572:44977585	chr12	44975572	44977585	2014	3.30502	5.18277	6.28668e-15	1.54818e-12
chr1:235570295:235573120	chr1	235570295	235573120	2826	2.78651	5.68824	7.8284e-15	1.88505e-12
chr5:149695684:149698495	chr5	149695684	149698495	2812	2.81488	5.77121	7.90696e-15	1.88505e-12
chr22:30611947:30615842	chr22	30611947	30615842	3896	2.23731	6.00756	8.94276e-15	2.10955e-12
chr6:73813979:73817943	chr6	73813979	73817943	3965	4.59508	5.92458	9.12632e-15	2.13043e-12
chr11:13857097:13860943	chr11	13857097	13860943	3847	2.38506	6.20181	1.10109e-14	2.51791e-12
chr1:116975598:116977669	chr1	116975598	116977669	2072	3.16531	5.07221	1.27039e-14	2.81875e-12
chr9:97689247:97693101	chr9	97689247	97693101	3855	2.02263	6.16639	1.4375e-14	3.15828e-12
chr9:73568542:73571144	chr9	73568542	73571144	2603	3.39004	4.80717	1.87921e-14	4.04934e-12
chr8:105191923:105195357	chr8	105191923	105195357	3435	3.31747	6.34078	1.9118e-14	4.08032e-12
chr17:39285540:39291345	chr17	39285540	39291345	5806	1.63592	7.51804	2.31838e-14	4.85561e-12
chr7:17137424:17140121	chr7	17137424	17140121	2698	2.13885	5.92755	2.38235e-14	4.94337e-12
chr4:33924765:33927711	chr4	33924765	33927711	2947	2.02331	6.32307	2.76e-14	5.62288e-12
chr5:36642987:36653239	chr5	36642987	36653239	10253	1.5995	8.06434	2.84863e-14	5.75116e-12
chr1:31869211:31871537	chr1	31869211	31871537	2327	3.15234	5.19278	2.93899e-14	5.8806e-12
chr11:34659734:34663864	chr11	34659734	34663864	4131	1.69859	6.79619	3.266e-14	6.30957e-12
chr8:128293769:128297605	chr8	128293769	128297605	3837	1.77426	6.79839	3.24245e-14	6.30957e-12
chr2:235270957:235273879	chr2	235270957	235273879	2923	1.9386	6.3017	4.03667e-14	7.53849e-12
chr8:128284200:128289591	chr8	128284200	128289591	5392	1.86373	6.62294	4.40063e-14	8.15025e-12
chr4:21769950:21771694	chr4	21769950	21771694	1745	4.08694	4.59546	4.78013e-14	8.78055e-12
chr13:72863973:72867535	chr13	72863973	72867535	3563	1.83087	6.43031	4.90134e-14	8.93001e-12
chr2:96714563:96716487	chr2	96714563	96716487	1925	3.59557	4.5582	5.48447e-14	9.83255e-12
chr1:20536976:20538754	chr1	20536976	20538754	1779	3.71411	4.66903	5.80009e-14	1.03159e-11
chr3:62925049:62927598	chr3	62925049	62927598	2550	2.91566	5.13253	5.98475e-14	1.05605e-11
chr5:52038609:52041559	chr5	52038609	52041559	2951	3.60607	4.84348	6.92862e-14	1.21305e-11
chr4:40563620:40568059	chr4	40563620	40568059	4440	1.55766	7.27967	7.16528e-14	1.24476e-11
chr7:157110032:157111713	chr7	157110032	157111713	1682	3.38711	4.75446	9.01233e-14	1.51854e-11
chr6:106056359:106058136	chr6	106056359	106058136	1778	3.30555	4.83105	9.40756e-14	1.56166e-11
chr3:62903303:62904847	chr3	62903303	62904847	1545	3.47721	4.89491	9.79434e-14	1.61391e-11
chr8:13050168:13052914	chr8	13050168	13052914	2747	2.64386	5.35924	1.04954e-13	1.70436e-11
chr1:164613693:164615893	chr1	164613693	164615893	2201	2.86962	5.06139	1.22094e-13	1.95437e-11
chr6:73521152:73522892	chr6	73521152	73522892	1741	3.89421	4.51155	1.31475e-13	2.08961e-11
chr4:168816737:168819221	chr4	168816737	168819221	2485	2.41884	5.25255	1.47974e-13	2.33529e-11
chr3:106934318:106938713	chr3	106934318	106938713	4396	1.43232	7.59058	1.50177e-13	2.35347e-11
chr1:192513727:192514816	chr1	192513727	192514816	1090	3.59368	4.40621	1.58039e-13	2.45948e-11
chr9:4224748:4227229	chr9	4224748	4227229	2482	3.18006	4.82948	1.61583e-13	2.46332e-11
chr12:13743534:13745770	chr12	13743534	13745770	2237	1.95587	6.17713	1.78047e-13	2.69597e-11
chr7:17445164:17449027	chr7	17445164	17449027	3864	1.9878	5.98943	2.13648e-13	3.10899e-11
chr12:27700196:27712109	chr12	27700196	27712109	11914	1.37728	8.28498	2.8067e-13	4.03193e-11
chr2:235747135:235750327	chr2	235747135	235750327	3193	2.09356	5.52897	3.087e-13	4.37846e-11
chr1:41331311:41333932	chr1	41331311	41333932	2622	2.5792	5.42081	3.1651e-13	4.43312e-11
chr8:13222568:13225757	chr8	13222568	13225757	3190	2.21909	5.6771	3.33703e-13	4.61622e-11
chr15:52385172:52387027	chr15	52385172	52387027	1856	2.98705	5.34781	3.45028e-13	4.7436e-11
chr8:104991643:104993660	chr8	104991643	104993660	2018	3.10854	4.97097	3.63616e-13	4.96868e-11
chr9:127070503:127073714	chr9	127070503	127073714	3212	1.90182	6.09885	3.94495e-13	5.35796e-11
chr11:13963432:13967153	chr11	13963432	13967153	3722	2.04435	5.6983	4.0767e-13	5.50354e-11
chr17:39693388:39697463	chr17	39693388	39697463	4076	2.66889	5.34998	4.23438e-13	5.66652e-11
chr6:11392809:11394896	chr6	11392809	11394896	2088	2.91403	4.92917	4.24799e-13	5.66652e-11
chr16:75353410:75355208	chr16	75353410	75355208	1799	3.23386	4.62354	4.47594e-13	5.86584e-11
chr11:100679442:100681469	chr11	100679442	100681469	2028	2.54447	5.34129	4.76188e-13	6.16843e-11
chr1:59039488:59040558	chr1	59039488	59040558	1071	3.7724	4.29328	5.05374e-13	6.50887e-11
chr5:27471510:27474056	chr5	27471510	27474056	2547	3.43796	4.91633	5.41647e-13	6.93617e-11
chr10:32249802:32253827	chr10	32249802	32253827	4026	1.60336	6.54904	5.6351e-13	7.17514e-11
chr3:62896702:62898203	chr3	62896702	62898203	1502	3.23211	4.65555	6.26412e-13	7.88646e-11
chr2:235903775:235905913	chr2	235903775	235905913	2139	2.71886	5.2336	7.17548e-13	8.8353e-11
chr21:46737530:46740919	chr21	46737530	46740919	3390	1.85885	5.87595	7.29778e-13	8.93679e-11
chr4:34181662:34184942	chr4	34181662	34184942	3281	1.42472	7.02394	7.66133e-13	9.33099e-11
chr2:19737152:19742640	chr2	19737152	19742640	5489	1.47911	7.02149	7.75542e-13	9.39454e-11
chr2:96439581:96441196	chr2	96439581	96441196	1616	3.40736	4.39337	7.90337e-13	9.52228e-11
chr2:20794746:20796826	chr2	20794746	20796826	2081	2.536	5.04467	8.91856e-13	1.06224e-10
chr2:52308770:52311721	chr2	52308770	52311721	2952	2.29919	5.19786	8.96268e-13	1.06224e-10
chr1:55893290:55896978	chr1	55893290	55896978	3689	1.55675	6.59602	9.10381e-13	1.06815e-10
chr18:45528575:45531578	chr18	45528575	45531578	3004	2.05073	5.86468	9.30245e-13	1.08577e-10
chr2:232549894:232551632	chr2	232549894	232551632	1739	2.24619	5.19963	1.06341e-12	1.23477e-10
chr11:34620509:34628238	chr11	34620509	34628238	7730	1.37469	7.62726	1.07596e-12	1.2429e-10
chr17:27948497:27952708	chr17	27948497	27952708	4212	1.92347	6.60753	1.15096e-12	1.31597e-10
chr3:52079326:52082810	chr3	52079326	52082810	3485	1.77695	6.02298	1.14744e-12	1.31597e-10
chr8:41008272:41011497	chr8	41008272	41011497	3226	1.79561	6.01191	1.18349e-12	1.34629e-10
chr5:371393:375283	chr5	371393	375283	3891	1.72765	6.1215	1.21163e-12	1.36445e-10
chr8:122360050:122362663	chr8	122360050	122362663	2614	1.8327	6.15597	1.20896e-12	1.36445e-10
chr10:74086405:74097285	chr10	74086405	74097285	10881	1.31219	7.952	1.28249e-12	1.42988e-10
chr19:51529111:51530352	chr19	51529111	51530352	1242	3.7893	4.1201	1.34465e-12	1.49177e-10
chr11:34649940:34659367	chr11	34649940	34659367	9428	1.54136	7.50558	1.38179e-12	1.52541e-10
chr8:122368431:122369843	chr8	122368431	122369843	1413	3.33276	4.25677	1.4947e-12	1.62603e-10
chr2:235593798:235596069	chr2	235593798	235596069	2272	1.80979	5.88689	1.51905e-12	1.64454e-10
chr10:21573832:21576408	chr10	21573832	21576408	2577	2.0358	5.48704	1.55366e-12	1.67392e-10
chr4:86418808:86421081	chr4	86418808	86421081	2274	2.04737	5.6171	1.66932e-12	1.78141e-10
chr17:46559001:46568475	chr17	46559001	46568475	9475	1.43039	8.44523	1.73153e-12	1.83903e-10
chr13:80509632:80511343	chr13	80509632	80511343	1712	3.18859	4.53138	1.80464e-12	1.90764e-10
chr17:41545583:41547409	chr17	41545583	41547409	1827	3.20205	4.35548	2.01616e-12	2.11131e-10
chr5:36653533:36661249	chr5	36653533	36661249	7717	1.31832	8.36882	2.34425e-12	2.43216e-10
chr6:119628669:119637671	chr6	119628669	119637671	9003	1.30125	7.5886	2.34266e-12	2.43216e-10
chr11:34670760:34677600	chr11	34670760	34677600	6841	1.35992	7.34539	3.08427e-12	3.12753e-10
chr21:35348127:35349824	chr21	35348127	35349824	1698	3.1099	4.40326	3.10936e-12	3.13877e-10
chr11:13944168:13947400	chr11	13944168	13947400	3233	1.66264	6.3732	3.81532e-12	3.81703e-10
chr12:27725422:27729002	chr12	27725422	27729002	3581	1.78461	5.93962	3.93495e-12	3.91921e-10
chr11:13889823:13892180	chr11	13889823	13892180	2358	1.74103	5.84882	3.96421e-12	3.93088e-10
chr1:5670866:5672993	chr1	5670866	5672993	2128	3.73663	5.13134	4.05058e-12	3.99883e-10
chr20:46599303:46603714	chr20	46599303	46603714	4412	1.53699	6.57682	4.76477e-12	4.66282e-10
chr12:31623371:31626725	chr12	31623371	31626725	3355	1.8645	5.91609	4.94103e-12	4.77278e-10
chr4:21468483:21470346	chr4	21468483	21470346	1864	4.02474	4.08694	5.27936e-12	5.05601e-10
chr2:235197313:235199718	chr2	235197313	235199718	2406	2.54073	5.02595	5.39723e-12	5.14689e-10
chr1:207197010:207201838	chr1	207197010	207201838	4829	1.41569	7.09622	5.9597e-12	5.65919e-10
chr12:63114778:63121188	chr12	63114778	63121188	6411	1.22735	7.83264	6.06535e-12	5.73521e-10
chr5:36661701:36667010	chr5	36661701	36667010	5310	1.36839	6.95172	6.12599e-12	5.76821e-10
chr8:121777115:121778603	chr8	121777115	121778603	1489	3.15992	4.31822	6.50401e-12	6.07312e-10
chr2:98221516:98222945	chr2	98221516	98222945	1430	2.96477	4.32737	7.23187e-12	6.72474e-10
chr1:117030237:117034011	chr1	117030237	117034011	3775	1.47114	6.75845	7.71834e-12	7.14744e-10
chr12:13748004:13752981	chr12	13748004	13752981	4978	2.02895	6.49686	7.78784e-12	7.18212e-10
chr1:209576895:209579103	chr1	209576895	209579103	2209	2.20937	5.06247	8.44477e-12	7.75603e-10
chr16:70774552:70775983	chr16	70774552	70775983	1432	3.10311	4.20762	8.78902e-12	8.03926e-10
chr10:72354974:72357110	chr10	72354974	72357110	2137	2.88685	4.55079	9.25095e-12	8.39328e-10
chr9:4237509:4238875	chr9	4237509	4238875	1367	3.41069	4.32762	9.33567e-12	8.43599e-10
chr6:102253889:102255566	chr6	102253889	102255566	1678	3.10308	4.336	1.00361e-11	9.03251e-10
chr12:89763860:89765470	chr12	89763860	89765470	1611	2.40287	4.72537	1.09729e-11	9.77277e-10
chr14:104333605:104334802	chr14	104333605	104334802	1198	3.38266	4.14768	1.09307e-11	9.77277e-10
chr7:157092352:157096782	chr7	157092352	157096782	4431	1.47289	6.25345	1.09895e-11	9.77277e-10
chr12:15066100:15067279	chr12	15066100	15067279	1180	2.64554	4.54756	1.11394e-11	9.86698e-10
chr1:164591589:164592900	chr1	164591589	164592900	1312	3.42045	4.00406	1.12547e-11	9.92982e-10
chr2:235149360:235151549	chr2	235149360	235151549	2190	2.25343	5.26104	1.19957e-11	1.05421e-09
chr17:39222135:39225119	chr17	39222135	39225119	2985	1.8465	6.02363	1.25255e-11	1.09647e-09
chr3:110384532:110386522	chr3	110384532	110386522	1991	2.18402	4.96748	1.26886e-11	1.10643e-09
chr11:34701687:34707993	chr11	34701687	34707993	6307	1.37272	7.09049	1.2797e-11	1.11155e-09
chr4:4428560:4430666	chr4	4428560	4430666	2107	2.57161	4.7122	1.32784e-11	1.14892e-09
chr11:13950121:13952133	chr11	13950121	13952133	2013	2.30381	4.96271	1.34006e-11	1.15503e-09
chr9:4235484:4237015	chr9	4235484	4237015	1532	2.44997	4.83347	1.36105e-11	1.16862e-09
chr5:669121:670755	chr5	669121	670755	1635	2.19621	4.96248	1.47489e-11	1.26154e-09
chr6:73830924:73831874	chr6	73830924	73831874	951	4.23414	3.81085	1.56632e-11	1.32458e-09
chr13:44854175:44856917	chr13	44854175	44856917	2743	2.24684	5.01145	1.75463e-11	1.47709e-09
chr3:36403554:36405044	chr3	36403554	36405044	1491	2.67193	4.47397	1.89908e-11	1.57226e-09
chr22:30618662:30626322	chr22	30618662	30626322	7661	1.1683	8.22207	1.91177e-11	1.5751e-09
chr14:54441611:54448904	chr14	54441611	54448904	7294	1.22362	7.63301	1.92793e-11	1.5826e-09
chr12:63138339:63139922	chr12	63138339	63139922	1584	3.28964	4.05822	1.93749e-11	1.58464e-09
chr1:94080467:94084559	chr1	94080467	94084559	4093	1.73755	6.73075	1.98416e-11	1.61691e-09
chr7:83816231:83818566	chr7	83816231	83818566	2336	2.35857	4.72856	2.27263e-11	1.84528e-09
chr5:133394146:133395386	chr5	133394146	133395386	1241	2.29165	5.07466	2.54567e-11	2.05952e-09
chr4:143468745:143474295	chr4	143468745	143474295	5551	1.19813	7.70303	2.63266e-11	2.12223e-09
chr4:143736112:143741551	chr4	143736112	143741551	5440	1.2185	7.73878	2.65417e-11	2.1319e-09
chr6:73839324:73840413	chr6	73839324	73840413	1090	3.67	3.90581	2.90535e-11	2.32532e-09
chr5:17678921:17680276	chr5	17678921	17680276	1356	4.16865	3.93459	2.94935e-11	2.34379e-09
chr7:83822751:83826087	chr7	83822751	83826087	3337	1.75783	5.73388	3.27346e-11	2.58304e-09
chr6:133450259:133454254	chr6	133450259	133454254	3996	1.25675	6.86241	3.28763e-11	2.58512e-09
chr8:103806197:103808262	chr8	103806197	103808262	2066	1.70889	5.68979	3.32157e-11	2.60267e-09
chr10:114235313:114237327	chr10	114235313	114237327	2015	1.44441	6.13431	3.3997e-11	2.64539e-09
chr13:111656740:111659798	chr13	111656740	111659798	3059	2.08002	5.62334	3.39368e-11	2.64539e-09
chr4:84109987:84111845	chr4	84109987	84111845	1859	2.25208	5.10403	3.47639e-11	2.69571e-09
chr6:45622764:45624826	chr6	45622764	45624826	2063	2.39747	4.76082	3.51521e-11	2.71641e-09
chr17:39809728:39812916	chr17	39809728	39812916	3189	1.60028	5.77673	3.91354e-11	3.00351e-09
chr8:135903525:135905762	chr8	135903525	135905762	2238	1.7527	5.5421	3.98402e-11	3.04717e-09
chr13:80511441:80512493	chr13	80511441	80512493	1053	3.38892	3.98028	4.38664e-11	3.34369e-09
chr20:46192180:46195689	chr20	46192180	46195689	3510	1.35922	6.3836	4.63533e-11	3.51044e-09
chr4:102095694:102099109	chr4	102095694	102099109	3416	1.40916	6.29279	5.36495e-11	4.02102e-09
chr6:26295537:26297619	chr6	26295537	26297619	2083	1.83898	5.57027	5.36245e-11	4.02102e-09
chr8:94854421:94862448	chr8	94854421	94862448	8028	1.1392	9.40389	5.58955e-11	4.14774e-09
chr14:102728319:102730512	chr14	102728319	102730512	2194	1.93506	5.06766	5.70389e-11	4.20474e-09
chr6:133412130:133425207	chr6	133412130	133425207	13078	1.15253	9.27526	5.73031e-11	4.21037e-09
chr8:74431500:74434681	chr8	74431500	74434681	3182	2.17552	5.23536	6.04401e-11	4.41193e-09
chr4:114946117:114947161	chr4	114946117	114947161	1045	3.71558	3.80339	6.11479e-11	4.44911e-09
chr4:93155023:93156721	chr4	93155023	93156721	1699	2.65639	4.42511	6.86739e-11	4.93263e-09
chr16:20948896:20949971	chr16	20948896	20949971	1076	3.64512	3.75766	7.1402e-11	5.09592e-09
chr8:29259233:29260653	chr8	29259233	29260653	1421	3.34021	3.83518	7.2587e-11	5.16405e-09
chr16:20910765:20918996	chr16	20910765	20918996	8232	1.08453	8.10759	7.7336e-11	5.48449e-09
chr3:197043220:197045496	chr3	197043220	197045496	2277	1.41842	6.33482	8.17796e-11	5.74508e-09
chr15:101257755:101271466	chr15	101257755	101271466	13712	1.13626	9.21421	8.76463e-11	6.13798e-09
chr8:29410762:29415257	chr8	29410762	29415257	4496	1.25873	7.31691	8.99698e-11	6.28107e-09
chr17:73865152:73867386	chr17	73865152	73867386	2235	1.7697	5.52013	9.84796e-11	6.79054e-09
chrX:132318770:132321193	chrX	132318770	132321193	2424	1.6576	5.72526	9.84489e-11	6.79054e-09
chr5:103689002:103691349	chr5	103689002	103691349	2348	2.14387	4.83496	1.02725e-10	7.01648e-09
chr9:116381679:116386135	chr9	116381679	116386135	4457	1.27894	6.40609	1.03009e-10	7.01648e-09
chr5:398502:402133	chr5	398502	402133	3632	1.29159	6.87849	1.09436e-10	7.38693e-09
chr17:66371767:66386133	chr17	66371767	66386133	14367	1.13448	10.0339	1.10718e-10	7.451e-09
chr11:28857141:28859106	chr11	28857141	28859106	1966	2.77791	4.57097	1.15877e-10	7.77487e-09
chr8:122156790:122159088	chr8	122156790	122159088	2299	1.51472	6.00117	1.17297e-10	7.84661e-09
chr17:39257993:39263247	chr17	39257993	39263247	5255	1.24114	7.05124	1.19289e-10	7.93256e-09
chr1:76702055:76706642	chr1	76702055	76706642	4588	1.23656	7.01553	1.26435e-10	8.38284e-09
chr2:159365871:159367686	chr2	159365871	159367686	1816	2.28689	4.62676	1.29952e-10	8.59062e-09
chr7:138437084:138438603	chr7	138437084	138438603	1520	2.43345	4.45055	1.31624e-10	8.67558e-09
chr6:130045355:130047103	chr6	130045355	130047103	1749	2.28448	4.76829	1.34626e-10	8.84742e-09
chr17:55937171:55942170	chr17	55937171	55942170	5000	1.31286	6.75119	1.37965e-10	9.01397e-09
chr14:24952178:24953642	chr14	24952178	24953642	1465	2.79133	4.06767	1.42996e-10	9.31553e-09
chr1:15676206:15680252	chr1	15676206	15680252	4047	1.28604	6.78966	1.47106e-10	9.54817e-09
chr20:22742846:22744711	chr20	22742846	22744711	1866	2.06209	5.10883	1.47419e-10	9.54817e-09
chr20:17004643:17006494	chr20	17004643	17006494	1852	3.63792	4.20221	1.48183e-10	9.56999e-09
chr10:112201001:112202251	chr10	112201001	112202251	1251	2.31248	4.75732	1.51311e-10	9.71601e-09
chr17:46547549:46551500	chr17	46547549	46551500	3952	1.3414	6.88074	1.53145e-10	9.80565e-09
chr10:114264689:114270719	chr10	114264689	114270719	6031	1.04188	8.44745	1.62031e-10	1.02864e-08
chr18:56250407:56252491	chr18	56250407	56252491	2085	1.67546	5.44226	1.65351e-10	1.04676e-08
chr11:68841990:68844349	chr11	68841990	68844349	2360	1.9631	5.03661	1.74782e-10	1.10335e-08
chr6:73782108:73793046	chr6	73782108	73793046	10939	5.15802	7.99286	1.76977e-10	1.11406e-08
chr22:39492883:39494982	chr22	39492883	39494982	2100	1.74259	5.40198	1.78762e-10	1.12214e-08
chr17:66350361:66351769	chr17	66350361	66351769	1409	1.92573	4.98881	1.82778e-10	1.14415e-08
chr5:17909773:17911267	chr5	17909773	17911267	1495	3.30189	3.91004	1.87136e-10	1.16817e-08
chr1:94203222:94205204	chr1	94203222	94205204	1983	1.6606	5.70584	1.89622e-10	1.17713e-08
chr4:37322099:37324704	chr4	37322099	37324704	2606	2.065	4.91318	1.89317e-10	1.17713e-08
chr1:77462852:77465221	chr1	77462852	77465221	2370	1.65797	5.51639	2.10145e-10	1.29378e-08
chr15:71155015:71156732	chr15	71155015	71156732	1718	2.09121	5.02464	2.10114e-10	1.29378e-08
chr17:29907315:29909372	chr17	29907315	29909372	2058	2.3983	4.37696	2.14998e-10	1.32003e-08
chr2:235166517:235168273	chr2	235166517	235168273	1757	1.78529	5.238	2.20516e-10	1.35021e-08
chr17:55950561:55960609	chr17	55950561	55960609	10049	1.07479	7.94787	2.23683e-10	1.36587e-08
chr13:45762973:45765102	chr13	45762973	45765102	2130	2.05762	5.11	2.41948e-10	1.47338e-08
chr9:71545698:71548214	chr9	71545698	71548214	2517	3.90225	5.2902	2.49217e-10	1.50945e-08
chr11:124350967:124353725	chr11	124350967	124353725	2759	1.47684	6.09507	2.57067e-10	1.55279e-08
chr4:143012012:143015009	chr4	143012012	143015009	2998	1.67338	5.37955	2.64402e-10	1.59132e-08
chr15:100076334:100077972	chr15	100076334	100077972	1639	2.4608	4.43888	2.74305e-10	1.64363e-08
chr1:57153311:57155101	chr1	57153311	57155101	1791	1.77246	5.31786	2.75867e-10	1.64476e-08
chr6:138775496:138778245	chr6	138775496	138778245	2750	1.53668	6.23552	2.75962e-10	1.64476e-08
chr7:17225071:17226475	chr7	17225071	17226475	1405	3.10217	4.07336	2.83248e-10	1.68371e-08
chr20:30262475:30264755	chr20	30262475	30264755	2281	1.63288	5.75119	2.84707e-10	1.6879e-08
chr9:114802768:114806206	chr9	114802768	114806206	3439	1.65116	5.45639	2.92747e-10	1.72644e-08
chr4:77702422:77705429	chr4	77702422	77705429	3008	1.32988	6.59141	3.16766e-10	1.85831e-08
chr7:102613400:102614571	chr7	102613400	102614571	1172	3.31112	3.70838	3.22065e-10	1.87955e-08
chr7:17701289:17702084	chr7	17701289	17702084	796	4.17821	3.34568	3.51625e-10	2.04673e-08
chr20:52225082:52230381	chr20	52225082	52230381	5300	1.11351	7.19196	3.57873e-10	2.0777e-08
chr1:59042773:59045080	chr1	59042773	59045080	2308	1.8979	5.10985	3.80338e-10	2.19675e-08
chr6:107981421:107983595	chr6	107981421	107983595	2175	1.66517	5.35154	3.96296e-10	2.28303e-08
chr5:67520319:67521426	chr5	67520319	67521426	1108	2.51999	4.43364	4.10325e-10	2.35225e-08
chr8:53676010:53677857	chr8	53676010	53677857	1848	2.07322	5.42299	4.58187e-10	2.60609e-08
chr6:72085216:72086568	chr6	72085216	72086568	1353	2.75308	4.04931	4.69812e-10	2.65871e-08
chr18:20131071:20132840	chr18	20131071	20132840	1770	3.05775	4.18648	4.71548e-10	2.66181e-08
chr14:65597843:65598925	chr14	65597843	65598925	1083	2.20534	4.50177	4.84094e-10	2.72576e-08
chr17:30049045:30050231	chr17	30049045	30050231	1187	3.0216	3.92208	5.01157e-10	2.79377e-08
chr17:56011859:56016046	chr17	56011859	56016046	4188	1.37801	6.05427	5.00913e-10	2.79377e-08
chr17:70693694:70696529	chr17	70693694	70696529	2836	1.63376	5.34125	5.08667e-10	2.82159e-08
chr1:17512338:17514005	chr1	17512338	17514005	1668	3.62947	4.5283	5.39309e-10	2.97683e-08
chr7:55841545:55842909	chr7	55841545	55842909	1365	2.40075	4.2876	5.46544e-10	3.00197e-08
chr4:114936186:114937730	chr4	114936186	114937730	1545	2.48684	4.2487	5.51215e-10	3.02023e-08
chr10:22004007:22005378	chr10	22004007	22005378	1372	1.86012	4.98817	5.679e-10	3.09651e-08
chr14:54465283:54469238	chr14	54465283	54469238	3956	1.20249	6.67959	5.73775e-10	3.12094e-08
chr3:17620933:17622058	chr3	17620933	17622058	1126	3.14744	3.7816	5.77276e-10	3.13239e-08
chr17:39064114:39074557	chr17	39064114	39074557	10444	1.06962	8.70561	5.91227e-10	3.20034e-08
chr4:183228455:183229579	chr4	183228455	183229579	1125	3.04373	3.77127	6.16359e-10	3.32034e-08
chr9:75790012:75792597	chr9	75790012	75792597	2586	1.40156	6.15547	6.15187e-10	3.32034e-08
chr10:114238041:114262865	chr10	114238041	114262865	24825	1.00254	9.94363	6.21431e-10	3.33963e-08
chr1:231274722:231276486	chr1	231274722	231276486	1765	2.1334	4.50989	6.41188e-10	3.42936e-08
chr14:92937925:92940437	chr14	92937925	92940437	2513	1.86206	4.97417	6.80466e-10	3.61357e-08
chr11:34805038:34805954	chr11	34805038	34805954	917	3.85372	3.29051	7.36885e-10	3.89646e-08
chr22:28082245:28083257	chr22	28082245	28083257	1013	2.12771	4.74861	7.52509e-10	3.95862e-08
chr15:101250971:101257549	chr15	101250971	101257549	6579	0.971387	8.44612	7.78264e-10	4.08452e-08
chr8:129179491:129181904	chr8	129179491	129181904	2414	1.52595	5.81467	8.08303e-10	4.2224e-08
chr22:39461479:39463371	chr22	39461479	39463371	1893	1.77004	5.20368	8.10493e-10	4.22399e-08
chr4:4713578:4715424	chr4	4713578	4715424	1847	1.89803	4.8707	8.15795e-10	4.23379e-08
chr7:46013329:46014643	chr7	46013329	46014643	1315	2.27577	4.28115	8.16153e-10	4.23379e-08
chr7:105415222:105418818	chr7	105415222	105418818	3597	1.26801	6.46996	8.23998e-10	4.26462e-08
chrX:45567627:45580311	chrX	45567627	45580311	12685	1.05847	9.10325	8.44961e-10	4.36304e-08
chr5:141474309:141476089	chr5	141474309	141476089	1781	1.87296	4.83808	8.54991e-10	4.40468e-08
chr10:114322150:114325570	chr10	114322150	114325570	3421	1.28337	6.30928	8.69879e-10	4.4711e-08
chr6:106040011:106042114	chr6	106040011	106042114	2104	2.59402	4.09281	8.74375e-10	4.48392e-08
chr17:39103305:39117125	chr17	39103305	39117125	13821	1.02927	9.50161	8.8287e-10	4.51713e-08
chr9:18490727:18491452	chr9	18490727	18491452	726	5.89413	3.08008	9.172e-10	4.67147e-08
chr9:113504307:113509236	chr9	113504307	113509236	4930	1.04286	7.11612	9.37467e-10	4.75308e-08
chr10:74050165:74059257	chr10	74050165	74059257	9093	1.0366	7.48048	9.45908e-10	4.78506e-08
chr11:69909301:69911693	chr11	69909301	69911693	2393	2.16111	5.36538	1.01834e-09	5.11681e-08
chr5:5598259:5599591	chr5	5598259	5599591	1333	2.20191	4.43745	1.02962e-09	5.16193e-08
chr18:10057435:10058597	chr18	10057435	10058597	1163	3.11051	3.8443	1.042e-09	5.21234e-08
chr17:53509809:53511900	chr17	53509809	53511900	2092	1.4192	5.72989	1.06966e-09	5.3388e-08
chr1:164651994:164653968	chr1	164651994	164653968	1975	2.08719	4.72774	1.11717e-09	5.55117e-08
chr16:70749011:70750629	chr16	70749011	70750629	1619	2.56836	4.11651	1.13778e-09	5.62864e-08
chr8:105252620:105253929	chr8	105252620	105253929	1310	2.74261	4.21787	1.136e-09	5.62864e-08
chr11:70327722:70329802	chr11	70327722	70329802	2081	1.62994	5.42825	1.16183e-09	5.73495e-08
chr2:235330754:235332106	chr2	235330754	235332106	1353	2.02934	4.61203	1.16499e-09	5.73788e-08
chr17:66283501:66290044	chr17	66283501	66290044	6544	1.11184	7.69924	1.25133e-09	6.13615e-08
chr1:94157082:94161130	chr1	94157082	94161130	4049	1.1315	7.25691	1.27085e-09	6.21827e-08
chr4:177363807:177365715	chr4	177363807	177365715	1909	1.42691	5.58196	1.31432e-09	6.40304e-08
chr11:111503669:111507717	chr11	111503669	111507717	4049	1.49734	5.41202	1.33481e-09	6.48874e-08
chr12:13676053:13677813	chr12	13676053	13677813	1761	1.59451	5.34349	1.39451e-09	6.72048e-08
chr5:103696804:103698323	chr5	103696804	103698323	1520	2.36492	4.28068	1.39748e-09	6.72048e-08
chr2:164634104:164637791	chr2	164634104	164637791	3688	1.22247	6.06421	1.48071e-09	7.07521e-08
chr7:111640844:111641902	chr7	111640844	111641902	1059	2.90707	3.74999	1.49139e-09	7.11109e-08
chr17:30050659:30051933	chr17	30050659	30051933	1275	2.94409	3.85854	1.54602e-09	7.34031e-08
chr4:160527536:160528471	chr4	160527536	160528471	936	3.08256	3.70793	1.54963e-09	7.34191e-08
chr1:20251044:20254202	chr1	20251044	20254202	3159	1.47088	5.88307	1.60757e-09	7.58435e-08
chr9:132354911:132362006	chr9	132354911	132362006	7096	1.05537	7.6392	1.61751e-09	7.61519e-08
chr16:2921884:2923412	chr16	2921884	2923412	1529	2.06403	4.62054	1.64076e-09	7.70846e-08
chr20:36771948:36773057	chr20	36771948	36773057	1110	2.40865	4.03669	1.64977e-09	7.71845e-08
chr3:41548565:41550184	chr3	41548565	41550184	1620	2.18613	4.55033	1.64924e-09	7.71845e-08
chr1:223167396:223170238	chr1	223167396	223170238	2843	1.41	5.87436	1.66572e-09	7.7765e-08
chr12:67217871:67218643	chr12	67217871	67218643	773	3.99279	3.17767	1.66912e-09	7.7765e-08
chr22:39486195:39487175	chr22	39486195	39487175	981	3.38504	3.39987	1.78316e-09	8.27341e-08
chr8:126422420:126426260	chr8	126422420	126426260	3841	1.08682	6.70828	1.84004e-09	8.51969e-08
chr19:46635677:46638262	chr19	46635677	46638262	2586	1.42958	5.75973	1.8828e-09	8.69161e-08
chr2:12996604:12998070	chr2	12996604	12998070	1467	2.59181	4.17834	1.88493e-09	8.69161e-08
chr8:94866514:94874016	chr8	94866514	94874016	7503	0.926145	8.42387	1.90433e-09	8.76304e-08
chr8:121773656:121775500	chr8	121773656	121775500	1845	2.39245	4.60866	1.92395e-09	8.8352e-08
chr12:15780670:15784706	chr12	15780670	15784706	4037	1.04941	7.67741	1.97175e-09	9.0288e-08
chr3:62953703:62954419	chr3	62953703	62954419	717	3.72238	3.36288	1.97417e-09	9.0288e-08
chr12:15062772:15064420	chr12	15062772	15064420	1649	1.78446	5.25946	2.00593e-09	9.15536e-08
chr13:97971038:97972333	chr13	97971038	97972333	1296	2.30809	4.23324	2.05171e-09	9.28867e-08
chr6:45554702:45555497	chr6	45554702	45555497	796	3.39905	3.41161	2.04853e-09	9.28867e-08
chr18:74776239:74781360	chr18	74776239	74781360	5122	1.01833	7.11844	2.0604e-09	9.29044e-08
chr3:109641394:109650546	chr3	109641394	109650546	9153	0.929315	8.46398	2.10812e-09	9.48654e-08
chr5:82390921:82395981	chr5	82390921	82395981	5061	1.22596	6.44048	2.13742e-09	9.59909e-08
chr1:80998431:81002993	chr1	80998431	81002993	4563	1.0895	6.81641	2.50116e-09	1.10773e-07
chr17:67758048:67759449	chr17	67758048	67759449	1402	2.06728	4.36877	2.4988e-09	1.10773e-07
chr14:92968226:92971202	chr14	92968226	92971202	2977	1.27384	5.85243	2.5403e-09	1.12284e-07
chr6:107986741:107988694	chr6	107986741	107988694	1954	1.76519	4.95477	2.64353e-09	1.16388e-07
chr4:182457693:182458940	chr4	182457693	182458940	1248	2.86963	3.63369	2.68749e-09	1.18092e-07
chr22:30599475:30611806	chr22	30599475	30611806	12332	0.965026	9.20495	2.73553e-09	1.19733e-07
chr7:83670766:83672403	chr7	83670766	83672403	1638	1.8281	4.78003	2.73542e-09	1.19733e-07
chr5:17951181:17952571	chr5	17951181	17952571	1391	5.15563	3.12034	2.75016e-09	1.20138e-07
chr3:29227218:29229612	chr3	29227218	29229612	2395	1.63096	5.15573	2.82643e-09	1.2323e-07
chr21:36577635:36579106	chr21	36577635	36579106	1472	3.06661	3.88601	2.86071e-09	1.24483e-07
chr2:101402281:101403758	chr2	101402281	101403758	1478	2.9735	3.72781	2.88758e-09	1.25408e-07
chr17:29922985:29924432	chr17	29922985	29924432	1448	2.21634	4.44177	2.97244e-09	1.28595e-07
chr10:21580465:21584076	chr10	21580465	21584076	3612	1.19587	6.42584	2.99314e-09	1.29241e-07
chr7:41045358:41048255	chr7	41045358	41048255	2898	1.2637	6.13945	3.06717e-09	1.32183e-07
chr12:27716001:27719145	chr12	27716001	27719145	3145	1.35666	5.9014	3.23058e-09	1.38913e-07
chr22:37997228:37998915	chr22	37997228	37998915	1688	1.69754	5.00295	3.23572e-09	1.38913e-07
chr1:241754298:241756807	chr1	241754298	241756807	2510	1.6914	4.90647	3.38256e-09	1.44922e-07
chr17:55944606:55948362	chr17	55944606	55948362	3757	1.20671	6.40424	3.55746e-09	1.51564e-07
chr7:17169506:17170731	chr7	17169506	17170731	1226	2.42281	4.0625	3.69122e-09	1.56076e-07
chr18:26733231:26738790	chr18	26733231	26738790	5560	1.34019	6.86275	3.7005e-09	1.56174e-07
chr10:21618636:21621952	chr10	21618636	21621952	3317	1.26586	5.91718	3.73642e-09	1.57107e-07
chr22:30589945:30594925	chr22	30589945	30594925	4981	1.01354	7.66988	3.98067e-09	1.66742e-07
chr10:114815692:114817158	chr10	114815692	114817158	1467	1.67211	5.00518	4.0464e-09	1.68958e-07
chr20:33913529:33916105	chr20	33913529	33916105	2577	1.43137	5.77663	4.04866e-09	1.68958e-07
chr19:38487645:38496038	chr19	38487645	38496038	8394	0.979379	8.08634	4.13748e-09	1.72344e-07
chr4:157267287:157269627	chr4	157267287	157269627	2341	1.33166	5.58188	4.34192e-09	1.79857e-07
chr2:232565913:232567556	chr2	232565913	232567556	1644	1.55726	5.1411	4.42628e-09	1.83013e-07
chr17:13443763:13445072	chr17	13443763	13445072	1310	2.17953	4.17466	4.47738e-09	1.84576e-07
chr8:94970482:94973980	chr8	94970482	94973980	3499	1.10177	6.6982	4.48056e-09	1.84576e-07
chr6:119575918:119584227	chr6	119575918	119584227	8310	0.925743	7.76977	4.68512e-09	1.92032e-07
chr6:73677884:73679625	chr6	73677884	73679625	1742	3.70512	5.1653	4.72118e-09	1.93069e-07
chrX:106943516:106944240	chrX	106943516	106944240	725	4.07638	2.99514	4.76789e-09	1.9427e-07
chr17:77892817:77893637	chr17	77892817	77893637	821	2.7387	3.75654	4.97623e-09	2.02391e-07
chr4:105981678:105983373	chr4	105981678	105983373	1696	1.79239	4.76123	5.16751e-09	2.09032e-07
chr13:102106871:102109068	chr13	102106871	102109068	2198	1.63073	5.30076	5.203e-09	2.10089e-07
chr15:90378815:90380982	chr15	90378815	90380982	2168	1.54608	5.10209	5.39765e-09	2.16777e-07
chr4:143322930:143330810	chr4	143322930	143330810	7881	0.899525	8.35755	5.39154e-09	2.16777e-07
chr7:28146979:28148409	chr7	28146979	28148409	1431	2.46336	3.98282	5.42399e-09	2.17445e-07
chr8:29385974:29389055	chr8	29385974	29389055	3082	1.18254	6.28815	5.5483e-09	2.21635e-07
chr5:52332754:52334543	chr5	52332754	52334543	1790	1.85137	4.68065	5.89572e-09	2.35095e-07
chr3:197035274:197038426	chr3	197035274	197038426	3153	1.21245	6.31849	6.0717e-09	2.41682e-07
chr3:189022318:189023292	chr3	189022318	189023292	975	2.39512	3.98159	6.20203e-09	2.46432e-07
chr3:141084246:141089396	chr3	141084246	141089396	5151	0.914029	7.72315	6.3168e-09	2.50548e-07
chr7:111649011:111649799	chr7	111649011	111649799	789	3.49157	3.17453	6.35894e-09	2.51773e-07
chr17:41511547:41513887	chr17	41511547	41513887	2341	1.60756	5.33168	6.42015e-09	2.53749e-07
chr3:37947028:37948607	chr3	37947028	37948607	1580	1.90192	4.52757	6.50853e-09	2.56789e-07
chr2:19172252:19173684	chr2	19172252	19173684	1433	2.01092	4.4004	6.54803e-09	2.57441e-07
chr9:132348890:132351719	chr9	132348890	132351719	2830	1.17582	6.06379	6.78829e-09	2.6642e-07
chr10:54258517:54260076	chr10	54258517	54260076	1560	2.49466	3.89823	6.83563e-09	2.67426e-07
chr10:74036876:74039140	chr10	74036876	74039140	2265	1.484	5.67555	6.93192e-09	2.70345e-07
chr9:4292758:4294329	chr9	4292758	4294329	1572	2.23196	4.2091	6.93656e-09	2.70345e-07
chr4:114878910:114882640	chr4	114878910	114882640	3731	1.26524	6.11852	7.132e-09	2.77479e-07
chr3:36413833:36415031	chr3	36413833	36415031	1199	2.37294	4.48584	7.20966e-09	2.80015e-07
chr17:78250916:78252998	chr17	78250916	78252998	2083	1.42858	5.38053	7.29916e-09	2.83e-07
chr19:2817331:2818976	chr19	2817331	2818976	1646	2.07626	4.79541	7.35019e-09	2.84487e-07
chr10:72318518:72321660	chr10	72318518	72321660	3143	1.3659	5.72607	8.23411e-09	3.17056e-07
chr8:13209756:13211833	chr8	13209756	13211833	2078	1.89321	4.97563	8.25462e-09	3.173e-07
chr1:172714221:172716275	chr1	172714221	172716275	2055	1.49567	5.1324	8.40767e-09	3.22598e-07
chr10:92072328:92081420	chr10	92072328	92081420	9093	0.975739	8.20342	8.54817e-09	3.26345e-07
chr8:94874305:94900432	chr8	94874305	94900432	26128	0.90856	10.972	8.80251e-09	3.34914e-07
chr4:139123191:139124671	chr4	139123191	139124671	1481	1.62907	5.06015	8.84395e-09	3.35854e-07
chr13:109567441:109569717	chr13	109567441	109569717	2277	1.32396	5.67108	8.93381e-09	3.38187e-07
chr8:23017031:23018589	chr8	23017031	23018589	1559	1.70633	4.80867	9.03674e-09	3.41506e-07
chr2:234881580:234884404	chr2	234881580	234884404	2825	1.24449	5.82067	9.40418e-09	3.54198e-07
chr2:235587556:235590392	chr2	235587556	235590392	2837	1.24992	6.25463	9.6448e-09	3.62044e-07
chr7:83714097:83715622	chr7	83714097	83715622	1526	1.99164	4.37793	9.67622e-09	3.62615e-07
chr4:143316686:143319626	chr4	143316686	143319626	2941	1.17655	5.93635	9.75587e-09	3.6499e-07
chr1:231647572:231648944	chr1	231647572	231648944	1373	2.11425	4.1974	1.01357e-08	3.78569e-07
chr9:137296751:137299943	chr9	137296751	137299943	3193	1.24967	5.85162	1.0451e-08	3.88404e-07
chr18:26743218:26746393	chr18	26743218	26746393	3176	1.41193	6.30365	1.05428e-08	3.91167e-07
chr6:72003510:72004265	chr6	72003510	72004265	756	2.9905	3.44771	1.07142e-08	3.96868e-07
chr12:13710687:13714811	chr12	13710687	13714811	4125	0.974005	7.12318	1.10309e-08	4.07927e-07
chr14:96875400:96877023	chr14	96875400	96877023	1624	2.34867	4.09223	1.11373e-08	4.11179e-07
chr3:102766219:102767381	chr3	102766219	102767381	1163	2.01568	4.27366	1.16412e-08	4.29078e-07
chr1:218671550:218673274	chr1	218671550	218673274	1725	1.81557	4.61183	1.16901e-08	4.30171e-07
chr16:51572421:51573599	chr16	51572421	51573599	1179	4.1854	3.57025	1.2083e-08	4.43175e-07
chr22:38293496:38295731	chr22	38293496	38295731	2236	1.66259	5.23142	1.23987e-08	4.54011e-07
chr11:13893856:13896222	chr11	13893856	13896222	2367	1.46358	5.62827	1.27656e-08	4.66686e-07
chr1:172730341:172731862	chr1	172730341	172731862	1522	2.47635	3.88422	1.34659e-08	4.89094e-07
chr1:164599530:164600234	chr1	164599530	164600234	705	2.84553	3.61986	1.3555e-08	4.91287e-07
chr7:84040050:84042912	chr7	84040050	84042912	2863	1.37017	5.41899	1.35701e-08	4.91287e-07
chr20:11830158:11832385	chr20	11830158	11832385	2228	2.29082	4.61332	1.36477e-08	4.93299e-07
chr9:4261585:4263705	chr9	4261585	4263705	2121	1.58069	5.0301	1.37623e-08	4.9664e-07
chr15:59565157:59571724	chr15	59565157	59571724	6568	0.931981	7.51908	1.39159e-08	5.01376e-07
chr16:2090173:2092623	chr16	2090173	2092623	2451	1.87423	5.38416	1.39495e-08	5.0178e-07
chr7:142247174:142248130	chr7	142247174	142248130	957	3.57432	3.23329	1.40154e-08	5.0334e-07
chr1:59057665:59059477	chr1	59057665	59059477	1813	1.65563	4.73686	1.42761e-08	5.11882e-07
chr7:16310740:16313555	chr7	16310740	16313555	2816	1.50277	5.37652	1.49404e-08	5.33144e-07
chr17:55974846:55979104	chr17	55974846	55979104	4259	1.00325	6.74512	1.50757e-08	5.37116e-07
chr5:57130470:57132545	chr5	57130470	57132545	2076	1.88428	4.81396	1.54456e-08	5.48408e-07
chr9:118434611:118436110	chr9	118434611	118436110	1500	2.5858	4.28272	1.58766e-08	5.62077e-07
chr12:66064414:66067810	chr12	66064414	66067810	3397	1.41033	5.56235	1.59389e-08	5.63391e-07
chr5:134475534:134478417	chr5	134475534	134478417	2884	1.19044	6.24543	1.5975e-08	5.63781e-07
chr5:52325985:52328791	chr5	52325985	52328791	2807	1.29919	5.46662	1.61353e-08	5.6765e-07
chr6:169573892:169574761	chr6	169573892	169574761	870	3.57858	3.06511	1.64079e-08	5.75432e-07
chr7:83653370:83655885	chr7	83653370	83655885	2516	1.62418	5.13904	1.64024e-08	5.75432e-07
chr8:121798033:121799300	chr8	121798033	121799300	1268	2.51354	4.17172	1.70937e-08	5.98548e-07
chr13:97953252:97962808	chr13	97953252	97962808	9557	0.858837	7.85542	1.71326e-08	5.98973e-07
chr17:39215017:39221485	chr17	39215017	39221485	6469	0.948104	7.34729	1.71774e-08	5.99604e-07
chr20:49294483:49295520	chr20	49294483	49295520	1038	2.60176	3.73062	1.72527e-08	6.01295e-07
chr17:55988645:55993526	chr17	55988645	55993526	4882	1.06935	6.31331	1.79829e-08	6.2287e-07
chr3:188065804:188067716	chr3	188065804	188067716	1913	1.35953	5.48538	1.81856e-08	6.28919e-07
chr2:235771384:235772953	chr2	235771384	235772953	1570	1.47272	5.2489	1.87713e-08	6.48173e-07
chr7:157101193:157104998	chr7	157101193	157104998	3806	0.95768	7.10375	1.89558e-08	6.53539e-07
chr12:115211851:115212366	chr12	115211851	115212366	516	4.0335	2.951	2.00015e-08	6.86422e-07
chr5:36502613:36503554	chr5	36502613	36503554	942	3.19336	3.51501	2.13108e-08	7.28012e-07
chr6:21109166:21112910	chr6	21109166	21112910	3745	0.920302	6.86683	2.15237e-08	7.34165e-07
chr6:161739211:161740161	chr6	161739211	161740161	951	3.6067	3.27068	2.18776e-08	7.4397e-07
chr11:13961389:13962827	chr11	13961389	13962827	1439	1.56612	5.13561	2.24109e-08	7.58651e-07
chr12:13720698:13729039	chr12	13720698	13729039	8342	0.845785	8.62071	2.24947e-08	7.60342e-07
chr10:47056236:47058662	chr10	47056236	47058662	2427	0.987731	6.75729	2.27223e-08	7.66877e-07
chr11:13156820:13157716	chr11	13156820	13157716	897	2.60695	3.73774	2.36226e-08	7.94867e-07
chr1:235092813:235094314	chr1	235092813	235094314	1502	1.82431	4.51313	2.38284e-08	7.99394e-07
chr19:17867685:17868643	chr19	17867685	17868643	959	2.45453	3.79833	2.38008e-08	7.99394e-07
chr16:81632339:81635520	chr16	81632339	81635520	3182	1.19222	5.98943	2.39829e-08	8.03372e-07
chr6:12313953:12315042	chr6	12313953	12315042	1090	2.45618	3.67981	2.47512e-08	8.26638e-07
chr9:18267970:18269400	chr9	18267970	18269400	1431	2.35153	3.95856	2.59933e-08	8.66831e-07
chr8:32578280:32579981	chr8	32578280	32579981	1702	2.04957	4.07049	2.63563e-08	8.76327e-07
chr3:197121292:197122511	chr3	197121292	197122511	1220	2.26928	3.9336	2.64586e-08	8.78427e-07
chr4:143299094:143302305	chr4	143299094	143302305	3212	1.02109	6.54929	2.66091e-08	8.82116e-07
chr11:10709715:10711103	chr11	10709715	10711103	1389	1.53539	5.22686	2.72817e-08	9.03076e-07
chr7:42232354:42233204	chr7	42232354	42233204	851	2.85356	3.44356	2.76134e-08	9.12707e-07
chr4:40623061:40624241	chr4	40623061	40624241	1181	1.9453	4.24744	2.76629e-08	9.12997e-07
chr7:17028630:17031097	chr7	17028630	17031097	2468	1.59641	5.17883	2.81897e-08	9.26293e-07
chr9:4136048:4138629	chr9	4136048	4138629	2582	1.27862	5.7317	2.81517e-08	9.26293e-07
chr3:149191192:149191934	chr3	149191192	149191934	743	2.7587	3.62233	2.87367e-08	9.42882e-07
chr1:164628800:164630223	chr1	164628800	164630223	1424	1.92619	4.3294	2.9883e-08	9.77632e-07
chr1:17516339:17517473	chr1	17516339	17517473	1135	2.05509	4.12172	3.04903e-08	9.94596e-07
chr22:18454717:18456574	chr22	18454717	18456574	1858	1.77225	4.8034	3.04729e-08	9.94596e-07
chr6:73737690:73743869	chr6	73737690	73743869	6180	4.80413	7.22743	3.13992e-08	1.01979e-06
chr3:124858510:124859745	chr3	124858510	124859745	1236	2.04054	4.23926	3.2076e-08	1.03876e-06
chr1:214577424:214579600	chr1	214577424	214579600	2177	2.21416	4.9147	3.25865e-08	1.05052e-06
chr8:142027204:142028721	chr8	142027204	142028721	1518	1.80339	4.50249	3.34851e-08	1.07661e-06
chr17:30114407:30116318	chr17	30114407	30116318	1912	2.4205	4.25202	3.37161e-08	1.08249e-06
chr19:51471441:51474680	chr19	51471441	51474680	3240	1.13011	5.91815	3.42839e-08	1.09914e-06
chr5:125689030:125691662	chr5	125689030	125691662	2633	1.03814	6.13021	3.5144e-08	1.12511e-06
chr16:70727163:70728577	chr16	70727163	70728577	1415	1.57024	4.83968	3.56624e-08	1.13845e-06
chr17:4436912:4438337	chr17	4436912	4438337	1426	2.34969	3.9332	3.56346e-08	1.13845e-06
chr7:47821436:47827804	chr7	47821436	47827804	6369	0.830412	8.14726	3.5987e-08	1.14393e-06
chr8:126653104:126659567	chr8	126653104	126659567	6464	0.846539	7.70442	3.5887e-08	1.14393e-06
chr2:157421057:157422703	chr2	157421057	157422703	1647	2.57737	3.8571	3.68766e-08	1.17054e-06
chr20:56591695:56593530	chr20	56591695	56593530	1836	1.7653	4.56023	3.81247e-08	1.20845e-06
chr7:79338626:79342598	chr7	79338626	79342598	3973	0.921176	6.68174	3.93645e-08	1.24599e-06
chr4:41143834:41150913	chr4	41143834	41150913	7080	0.822218	8.09664	3.95747e-08	1.25087e-06
chr1:120107188:120109127	chr1	120107188	120109127	1940	1.39498	5.2474	4.00361e-08	1.26367e-06
chr4:160529087:160530257	chr4	160529087	160530257	1171	2.19305	3.92607	4.03037e-08	1.27033e-06
chr5:36688572:36691606	chr5	36688572	36691606	3035	1.27042	5.56735	4.27242e-08	1.34097e-06
chr20:52522715:52523957	chr20	52522715	52523957	1243	1.7822	4.61476	4.48821e-08	1.40476e-06
chr1:218846006:218849006	chr1	218846006	218849006	3001	1.12985	5.8424	4.65704e-08	1.45557e-06
chr7:14787280:14788896	chr7	14787280	14788896	1617	1.91093	4.28349	4.86391e-08	1.51389e-06
chr3:110489861:110494588	chr3	110489861	110494588	4728	0.842381	7.40896	4.9536e-08	1.53967e-06
chr16:19393723:19397150	chr16	19393723	19397150	3428	0.977186	6.41685	5.0297e-08	1.56116e-06
chr12:65959220:65960829	chr12	65959220	65960829	1610	1.74052	4.60535	5.07064e-08	1.57169e-06
chr3:126629472:126631227	chr3	126629472	126631227	1756	1.42566	4.98537	5.08675e-08	1.5745e-06
chr3:158881405:158882771	chr3	158881405	158882771	1367	1.4804	4.93733	5.10339e-08	1.57747e-06
chr22:30640298:30650875	chr22	30640298	30650875	10578	0.807459	8.2724	5.31388e-08	1.63802e-06
chr6:105657445:105658789	chr6	105657445	105658789	1345	2.01849	4.05908	5.4554e-08	1.67703e-06
chr17:55965682:55973991	chr17	55965682	55973991	8310	0.843907	8.01868	5.48326e-08	1.68329e-06
chr6:119861987:119863274	chr6	119861987	119863274	1288	1.6807	4.51071	5.58043e-08	1.7061e-06
chr7:96286388:96287324	chr7	96286388	96287324	937	3.28941	3.3344	5.64469e-08	1.7234e-06
chr1:164762987:164764023	chr1	164762987	164764023	1037	2.60189	3.51138	5.65608e-08	1.72453e-06
chr8:32567902:32570103	chr8	32567902	32570103	2202	1.88283	4.45775	5.67225e-08	1.72637e-06
chr2:31606638:31608828	chr2	31606638	31608828	2191	1.45573	5.65792	5.95838e-08	1.79963e-06
chr2:235410598:235411955	chr2	235410598	235411955	1358	1.8383	4.25886	6.02381e-08	1.81687e-06
chr5:36442001:36443340	chr5	36442001	36443340	1340	1.7936	4.60207	6.36477e-08	1.91199e-06
chr1:218632532:218634239	chr1	218632532	218634239	1708	1.61887	4.67146	6.57153e-08	1.96619e-06
chr9:124330776:124331732	chr9	124330776	124331732	957	2.7826	3.37606	6.87657e-08	2.04926e-06
chr13:102101573:102103885	chr13	102101573	102103885	2313	1.10312	6.37362	7.13034e-08	2.11644e-06
chr1:159879958:159881270	chr1	159879958	159881270	1313	2.27127	3.78501	7.32019e-08	2.16991e-06
chr13:34618167:34619532	chr13	34618167	34619532	1366	1.81459	4.21676	7.3339e-08	2.1711e-06
chr20:31214978:31217491	chr20	31214978	31217491	2514	1.38099	5.27035	7.44333e-08	2.20059e-06
chr8:53809678:53811086	chr8	53809678	53811086	1409	1.91514	4.25691	7.67584e-08	2.26039e-06
chr4:182582474:182584217	chr4	182582474	182584217	1744	2.68317	3.49837	7.70854e-08	2.26704e-06
chr10:128128284:128129272	chr10	128128284	128129272	989	2.28915	3.7305	7.85766e-08	2.30787e-06
chr11:96047052:96048595	chr11	96047052	96048595	1544	1.45944	5.04301	8.28343e-08	2.41708e-06
chr13:21039254:21039888	chr13	21039254	21039888	635	2.69789	3.31644	8.54591e-08	2.48397e-06
chr9:84173103:84176054	chr9	84173103	84176054	2952	1.43691	5.39203	8.58765e-08	2.49286e-06
chr11:123088814:123089713	chr11	123088814	123089713	900	2.27488	3.87554	8.68289e-08	2.51725e-06
chr17:37786583:37790020	chr17	37786583	37790020	3438	1.13423	5.82112	8.77716e-08	2.54129e-06
chr2:232046446:232047555	chr2	232046446	232047555	1110	1.73873	4.27491	8.87156e-08	2.56531e-06
chr2:72107364:72108865	chr2	72107364	72108865	1502	1.77326	4.37466	8.96294e-08	2.58506e-06
chr15:96596075:96597398	chr15	96596075	96597398	1324	1.71864	4.35417	9.07413e-08	2.61041e-06
chr6:83106263:83108511	chr6	83106263	83108511	2249	1.2055	5.64729	9.09249e-08	2.61234e-06
chr8:32558554:32561025	chr8	32558554	32561025	2472	2.11256	4.04505	9.18233e-08	2.63141e-06
chr15:70488383:70489790	chr15	70488383	70489790	1408	2.1114	4.19253	9.56473e-08	2.734e-06
chr10:73928587:73936695	chr10	73928587	73936695	8109	0.848384	8.43684	9.65564e-08	2.75647e-06
chr8:128255711:128267437	chr8	128255711	128267437	11727	0.800975	9.31192	9.77041e-08	2.78568e-06
chr6:30730774:30733176	chr6	30730774	30733176	2403	0.997846	6.17175	9.79048e-08	2.78786e-06
chr15:59585746:59589148	chr15	59585746	59589148	3403	0.906436	7.2165	1.00085e-07	2.84632e-06
chr16:81869531:81870934	chr16	81869531	81870934	1404	1.99189	3.94303	1.00365e-07	2.85067e-06
chr7:106463883:106465476	chr7	106463883	106465476	1594	1.48219	5.17098	1.00731e-07	2.85743e-06
chr13:45790955:45796111	chr13	45790955	45796111	5157	0.854844	7.38952	1.01426e-07	2.87352e-06
chr5:151073121:151074916	chr5	151073121	151074916	1796	1.59255	4.62429	1.02101e-07	2.88898e-06
chr12:63187596:63188179	chr12	63187596	63188179	584	2.45401	3.6172	1.02494e-07	2.89644e-06
chr10:3112787:3114624	chr10	3112787	3114624	1838	1.28096	5.52687	1.03477e-07	2.91687e-06
chr17:38694378:38695373	chr17	38694378	38695373	996	2.57625	3.47383	1.03423e-07	2.91687e-06
chr10:15241474:15245739	chr10	15241474	15245739	4266	0.832602	7.47176	1.03734e-07	2.92045e-06
chr17:66394396:66396796	chr17	66394396	66396796	2401	1.32715	5.32079	1.04187e-07	2.92953e-06
chr12:116996321:116998034	chr12	116996321	116998034	1714	1.45835	4.8787	1.05891e-07	2.96626e-06
chr3:189041631:189043401	chr3	189041631	189043401	1771	1.26125	5.26029	1.06163e-07	2.97018e-06
chr2:12955784:12957885	chr2	12955784	12957885	2102	1.43034	4.89562	1.06901e-07	2.98338e-06
chr5:133389150:133390781	chr5	133389150	133390781	1632	2.06025	4.30158	1.0712e-07	2.98578e-06
chr7:80529925:80531293	chr7	80529925	80531293	1369	2.37049	3.74862	1.08822e-07	3.02943e-06
chr4:16141822:16143559	chr4	16141822	16143559	1738	1.19741	5.33785	1.10607e-07	3.07531e-06
chr4:36552169:36554533	chr4	36552169	36554533	2365	1.51765	4.95203	1.16447e-07	3.22966e-06
chr4:15690425:15693588	chr4	15690425	15693588	3164	1.02864	6.34986	1.16729e-07	3.23348e-06
chr1:59048993:59052311	chr1	59048993	59052311	3319	0.912595	6.9647	1.19488e-07	3.30583e-06
chr3:187120313:187122465	chr3	187120313	187122465	2153	1.32882	5.24814	1.23229e-07	3.39676e-06
chr10:11939817:11941667	chr10	11939817	11941667	1851	1.31499	5.16396	1.28068e-07	3.52581e-06
chr20:23117007:23118108	chr20	23117007	23118108	1102	2.53689	3.58123	1.28449e-07	3.53196e-06
chr9:132316813:132323548	chr9	132316813	132323548	6736	0.899196	7.50127	1.28628e-07	3.53254e-06
chr1:10725633:10726384	chr1	10725633	10726384	752	3.84135	2.79958	1.31892e-07	3.61014e-06
chr2:23040162:23040555	chr2	23040162	23040555	394	4.07777	2.67737	1.35648e-07	3.69815e-06
chr6:90007247:90009520	chr6	90007247	90009520	2274	1.21304	5.39547	1.3632e-07	3.71194e-06
chr5:58193149:58194364	chr5	58193149	58194364	1216	2.65691	3.47466	1.40691e-07	3.81706e-06
chr7:16168193:16170549	chr7	16168193	16170549	2357	1.2413	5.28578	1.42521e-07	3.86202e-06
chr9:3874783:3876076	chr9	3874783	3876076	1294	2.40587	3.50807	1.43223e-07	3.87635e-06
chr10:21602832:21605734	chr10	21602832	21605734	2903	0.974627	6.16221	1.48118e-07	4.00402e-06
chr9:78638328:78639494	chr9	78638328	78639494	1167	2.01376	3.88636	1.48864e-07	4.01933e-06
chr6:119490866:119494961	chr6	119490866	119494961	4096	0.972036	6.56685	1.49062e-07	4.01982e-06
chr20:49340375:49350818	chr20	49340375	49350818	10444	0.766056	8.29627	1.49989e-07	4.03376e-06
chr22:37920922:37923610	chr22	37920922	37923610	2689	1.01053	5.86807	1.52749e-07	4.09952e-06
chr18:25423411:25424951	chr18	25423411	25424951	1541	1.7415	4.19213	1.58309e-07	4.23353e-06
chr1:42411254:42412631	chr1	42411254	42412631	1378	1.52535	4.55288	1.59244e-07	4.25348e-06
chr8:94921603:94934441	chr8	94921603	94934441	12839	0.748534	9.09898	1.61086e-07	4.28733e-06
chr3:30323022:30324965	chr3	30323022	30324965	1944	1.21552	5.42166	1.63957e-07	4.3534e-06
chr4:30183747:30184797	chr4	30183747	30184797	1051	2.54947	3.3833	1.6517e-07	4.37526e-06
chr4:139268143:139270265	chr4	139268143	139270265	2123	1.24567	5.27447	1.6774e-07	4.43807e-06
chr11:61462391:61465254	chr11	61462391	61465254	2864	1.13096	5.7109	1.71184e-07	4.51852e-06
chr10:126127798:126128774	chr10	126127798	126128774	977	2.73843	3.24611	1.72783e-07	4.55537e-06
chr5:10635540:10635985	chr5	10635540	10635985	446	5.03617	2.36967	1.79392e-07	4.70195e-06
chr9:22147610:22148990	chr9	22147610	22148990	1381	1.70794	4.38091	1.82852e-07	4.78705e-06
chr8:126690577:126702397	chr8	126690577	126702397	11821	0.74771	9.62402	1.8746e-07	4.90196e-06
chr1:15672726:15673298	chr1	15672726	15673298	573	2.56034	3.46354	1.91605e-07	4.99868e-06
chr4:74569639:74571571	chr4	74569639	74571571	1933	1.35143	5.13611	1.92269e-07	5.01018e-06
chr21:36522692:36524235	chr21	36522692	36524235	1544	1.66237	4.52221	1.96807e-07	5.11653e-06
chr4:23335313:23336100	chr4	23335313	23336100	788	3.64914	2.65399	1.96658e-07	5.11653e-06
chr7:17314089:17314628	chr7	17314089	17314628	540	2.44205	3.52786	1.97909e-07	5.13922e-06
chr12:31669973:31673548	chr12	31669973	31673548	3576	0.836975	6.9034	1.99404e-07	5.17205e-06
chr2:113975049:113978353	chr2	113975049	113978353	3305	1.22805	5.42269	1.99966e-07	5.18062e-06
chr12:16034076:16036720	chr12	16034076	16036720	2645	0.786139	7.27681	2.00553e-07	5.18983e-06
chr14:102770706:102773132	chr14	102770706	102773132	2427	1.01573	5.92941	2.06164e-07	5.32273e-06
chr10:72334962:72340325	chr10	72334962	72340325	5364	0.80987	7.88656	2.18043e-07	5.61216e-06
chr8:32435158:32436381	chr8	32435158	32436381	1224	3.1133	3.04986	2.21484e-07	5.69204e-06
chr8:90558032:90559863	chr8	90558032	90559863	1832	1.18739	5.6141	2.28809e-07	5.86684e-06
chr6:117936582:117937310	chr6	117936582	117937310	729	2.8893	3.14552	2.29461e-07	5.87683e-06
chr5:81684829:81685771	chr5	81684829	81685771	943	1.82822	4.06179	2.36241e-07	6.03667e-06
chr14:53857743:53860029	chr14	53857743	53860029	2287	1.11965	5.45566	2.36561e-07	6.03796e-06
chr1:218878532:218880596	chr1	218878532	218880596	2065	1.13362	5.54042	2.3848e-07	6.07084e-06
chr2:27942380:27945458	chr2	27942380	27945458	3079	1.16365	5.90508	2.39537e-07	6.08619e-06
chr13:76059069:76061369	chr13	76059069	76061369	2301	1.35533	5.21077	2.42924e-07	6.16525e-06
chr5:10550368:10553338	chr5	10550368	10553338	2971	0.79818	7.26041	2.43496e-07	6.17279e-06
chr2:158029528:158030863	chr2	158029528	158030863	1336	2.25026	3.81967	2.44799e-07	6.19881e-06
chr1:167142145:167144284	chr1	167142145	167144284	2140	1.54793	4.65092	2.4687e-07	6.23716e-06
chr6:36643737:36649086	chr6	36643737	36649086	5350	0.946107	6.40581	2.47557e-07	6.24355e-06
chr1:17494746:17495765	chr1	17494746	17495765	1020	2.49845	3.43688	2.57581e-07	6.46404e-06
chr6:119528515:119530401	chr6	119528515	119530401	1887	1.23076	5.19681	2.58678e-07	6.48431e-06
chr3:46557507:46559757	chr3	46557507	46559757	2251	1.12374	5.70072	2.64109e-07	6.61304e-06
chr22:47732367:47734277	chr22	47732367	47734277	1911	1.17314	5.39676	2.69024e-07	6.71372e-06
chr4:124338717:124340323	chr4	124338717	124340323	1607	1.60125	4.38966	2.69028e-07	6.71372e-06
chr11:65676229:65688019	chr11	65676229	65688019	11791	0.761328	9.21933	2.75308e-07	6.86279e-06
chr1:43937458:43940244	chr1	43937458	43940244	2787	0.911992	6.72784	2.77258e-07	6.90372e-06
chr1:94165991:94170318	chr1	94165991	94170318	4328	0.795576	7.60074	2.78673e-07	6.93127e-06
chr19:1652608:1656042	chr19	1652608	1656042	3435	0.903947	6.23667	2.81003e-07	6.97384e-06
chr2:53160171:53163570	chr2	53160171	53163570	3400	0.915772	6.51887	2.81007e-07	6.97384e-06
chr8:121839737:121840668	chr8	121839737	121840668	932	2.26973	3.8403	2.82868e-07	7.01225e-06
chr4:143765723:143768555	chr4	143765723	143768555	2833	1.43828	4.95527	2.90468e-07	7.1927e-06
chr2:28836389:28837611	chr2	28836389	28837611	1223	2.15492	3.79868	2.97165e-07	7.34231e-06
chr2:230319298:230320650	chr2	230319298	230320650	1353	1.63246	4.37324	3.02183e-07	7.45806e-06
chr4:96225554:96226675	chr4	96225554	96226675	1122	2.41525	3.7724	3.03507e-07	7.48249e-06
chr1:214611521:214614289	chr1	214611521	214614289	2769	1.08798	5.6345	3.08693e-07	7.59363e-06
chr1:96207892:96208878	chr1	96207892	96208878	987	1.87618	4.0926	3.17802e-07	7.80914e-06
chr3:168669120:168670242	chr3	168669120	168670242	1123	2.08455	3.82489	3.18284e-07	7.81243e-06
chr3:112994499:112995253	chr3	112994499	112995253	755	2.52955	3.28851	3.19698e-07	7.83854e-06
chr1:164570520:164573289	chr1	164570520	164573289	2770	1.33124	5.29156	3.25047e-07	7.94361e-06
chr11:64312660:64313698	chr11	64312660	64313698	1039	2.08338	3.74191	3.30831e-07	8.05796e-06
chr14:65928397:65929885	chr14	65928397	65929885	1489	2.08251	3.9331	3.31164e-07	8.05796e-06
chr12:65918059:65920119	chr12	65918059	65920119	2061	1.15504	5.38585	3.35593e-07	8.13923e-06
chr1:181103332:181105712	chr1	181103332	181105712	2381	1.085	5.80269	3.35962e-07	8.13937e-06
chr10:103697540:103700050	chr10	103697540	103700050	2511	0.993479	6.18127	3.37951e-07	8.17825e-06
chr4:143274181:143274861	chr4	143274181	143274861	681	1.81525	4.25352	3.57369e-07	8.61144e-06
chr8:16682786:16684914	chr8	16682786	16684914	2129	1.32609	5.13058	3.58478e-07	8.61962e-06
chr1:44299929:44301847	chr1	44299929	44301847	1919	1.31691	5.01425	3.59669e-07	8.62976e-06
chr19:6576346:6578237	chr19	6576346	6578237	1892	1.51985	4.7891	3.60465e-07	8.63959e-06
chr13:97904387:97936895	chr13	97904387	97936895	32509	0.75263	10.6532	3.66545e-07	8.76656e-06
chr7:17279389:17280382	chr7	17279389	17280382	994	2.16908	3.5883	3.70196e-07	8.82012e-06
chr1:57110353:57112178	chr1	57110353	57112178	1826	1.796	4.20883	3.75702e-07	8.92841e-06
chr15:67305938:67306537	chr15	67305938	67306537	600	2.62345	3.24842	3.76201e-07	8.93078e-06
chr14:54581234:54584147	chr14	54581234	54584147	2914	1.06828	5.5282	3.81393e-07	9.02536e-06
chr1:167132247:167133058	chr1	167132247	167133058	812	2.04963	3.7181	3.83175e-07	9.04872e-06
chr3:110531020:110536923	chr3	110531020	110536923	5904	0.745407	8.10945	3.83188e-07	9.04872e-06
chr12:12911413:12912081	chr12	12911413	12912081	669	2.1837	3.52957	3.84705e-07	9.07498e-06
chr1:94219854:94221151	chr1	94219854	94221151	1298	1.66813	4.53509	3.8619e-07	9.10043e-06
chr4:16068692:16070084	chr4	16068692	16070084	1393	1.72717	4.27985	3.89259e-07	9.16312e-06
chr1:31893988:31895811	chr1	31893988	31895811	1824	1.68445	4.97339	3.92707e-07	9.2346e-06
chr10:126124558:126125487	chr10	126124558	126125487	930	2.42617	3.53583	3.97607e-07	9.33022e-06
chr12:43184097:43185139	chr12	43184097	43185139	1043	1.82804	4.12589	4.11344e-07	9.60232e-06
chr1:209583263:209583618	chr1	209583263	209583618	356	3.22817	2.77596	4.29692e-07	9.97864e-06
chr13:48640374:48641422	chr13	48640374	48641422	1049	2.41075	3.76413	4.3373e-07	1.0062e-05
chr4:34149575:34150584	chr4	34149575	34150584	1010	2.01235	3.76944	4.45932e-07	1.03153e-05
chr5:171380046:171382964	chr5	171380046	171382964	2919	0.888588	6.48991	4.46534e-07	1.03163e-05
chr22:23593361:23594366	chr22	23593361	23594366	1006	2.01246	3.78535	4.49322e-07	1.03639e-05
chr8:119450928:119453416	chr8	119450928	119453416	2489	0.811126	6.88585	4.4952e-07	1.03639e-05
chr2:96305714:96309323	chr2	96305714	96309323	3610	0.828019	6.58448	4.51198e-07	1.03813e-05
chr2:235055980:235057233	chr2	235055980	235057233	1254	2.22899	3.57023	4.52265e-07	1.03864e-05
chr15:75015863:75019422	chr15	75015863	75019422	3560	0.919239	6.15235	4.56609e-07	1.04628e-05
chr6:30734178:30739340	chr6	30734178	30739340	5163	0.73973	7.92854	4.58121e-07	1.04867e-05
chr9:97679247:97685655	chr9	97679247	97685655	6409	0.808797	6.77608	4.60865e-07	1.05388e-05
chr17:69629205:69630968	chr17	69629205	69630968	1764	1.41022	4.78022	4.61719e-07	1.05475e-05
chr15:50454937:50456120	chr15	50454937	50456120	1184	1.71147	4.33922	4.65999e-07	1.06236e-05
chr13:101910268:101911514	chr13	101910268	101911514	1247	1.61441	4.83121	4.83368e-07	1.09861e-05
chr15:99342498:99345401	chr15	99342498	99345401	2904	0.893997	6.20314	4.86446e-07	1.10448e-05
chr11:3926006:3927234	chr11	3926006	3927234	1229	1.66163	4.29132	4.93728e-07	1.11875e-05
chr4:157691476:157693613	chr4	157691476	157693613	2138	1.14636	5.3967	5.06979e-07	1.14762e-05
chr2:227202693:227203808	chr2	227202693	227203808	1116	1.61256	4.32667	5.12026e-07	1.1567e-05
chr17:6655696:6656698	chr17	6655696	6656698	1003	2.77113	3.16495	5.12794e-07	1.15727e-05
chr16:66960911:66962897	chr16	66960911	66962897	1987	1.63099	4.47643	5.25679e-07	1.18278e-05
chr3:189072709:189074338	chr3	189072709	189074338	1630	1.4274	4.66046	5.30441e-07	1.1911e-05
chr15:60660273:60675770	chr15	60660273	60675770	15498	0.724447	9.00715	5.36153e-07	1.20152e-05
chr12:123430628:123432793	chr12	123430628	123432793	2166	0.99756	5.91866	5.4176e-07	1.20814e-05
chr5:139113140:139113879	chr5	139113140	139113879	740	2.70858	3.10952	5.41802e-07	1.20814e-05
chr2:10428852:10431134	chr2	10428852	10431134	2283	0.929078	6.02669	5.58976e-07	1.24282e-05
chr6:44025378:44027551	chr6	44025378	44027551	2174	1.39514	4.90158	5.59021e-07	1.24282e-05
chr6:125320176:125320916	chr6	125320176	125320916	741	2.10399	3.58665	5.61411e-07	1.2469e-05
chr10:92034685:92035505	chr10	92034685	92035505	821	1.87191	3.81833	5.66921e-07	1.25665e-05
chr17:63738065:63739765	chr17	63738065	63739765	1701	1.35044	4.78391	5.6851e-07	1.25892e-05
chr6:128811854:128813858	chr6	128811854	128813858	2005	0.977002	5.73823	5.69448e-07	1.25976e-05
chr9:113510602:113511982	chr9	113510602	113511982	1381	1.17775	5.13061	5.71302e-07	1.26261e-05
chr7:111560010:111560692	chr7	111560010	111560692	683	3.1623	2.92757	5.89835e-07	1.30228e-05
chr17:48045483:48047203	chr17	48045483	48047203	1721	1.017	5.61476	5.92703e-07	1.30733e-05
chr17:16922990:16926151	chr17	16922990	16926151	3162	0.929725	6.18927	6.06896e-07	1.33732e-05
chr11:13905022:13906880	chr11	13905022	13906880	1859	1.55477	4.60476	6.09767e-07	1.34233e-05
chr1:117420946:117422622	chr1	117420946	117422622	1677	1.55742	4.40209	6.15914e-07	1.3532e-05
chr14:95064584:95068859	chr14	95064584	95068859	4276	0.880893	6.82375	6.21775e-07	1.36474e-05
chr7:56077481:56078298	chr7	56077481	56078298	818	2.7356	3.01239	6.36372e-07	1.39541e-05
chr10:74067526:74069544	chr10	74067526	74069544	2019	1.31758	4.94662	6.52063e-07	1.42842e-05
chr8:129187935:129191001	chr8	129187935	129191001	3067	0.869097	6.6392	6.53151e-07	1.4294e-05
chr13:97994163:97995264	chr13	97994163	97995264	1102	1.55912	4.47401	6.60925e-07	1.44501e-05
chr1:7358642:7362063	chr1	7358642	7362063	3422	0.820403	6.80349	6.64452e-07	1.4513e-05
chr15:59595848:59597992	chr15	59595848	59597992	2145	1.10571	5.48534	6.66946e-07	1.45533e-05
chrX:37919233:37921872	chrX	37919233	37921872	2640	1.27077	4.89114	6.8882e-07	1.50014e-05
chr8:126663576:126682136	chr8	126663576	126682136	18561	0.7225	10.4527	6.91829e-07	1.50523e-05
chr6:73529121:73530140	chr6	73529121	73530140	1020	3.01732	3.26227	7.01496e-07	1.52036e-05
chr6:134088778:134091996	chr6	134088778	134091996	3219	1.64102	4.19287	7.08434e-07	1.53391e-05
chr5:81661277:81662218	chr5	81661277	81662218	942	1.61629	4.42696	7.09616e-07	1.53499e-05
chr8:126617783:126621237	chr8	126617783	126621237	3455	0.817217	6.51129	7.12662e-07	1.54009e-05
chr4:6689908:6692948	chr4	6689908	6692948	3041	0.859417	6.38711	7.21633e-07	1.55798e-05
chr18:56207829:56210142	chr18	56207829	56210142	2314	1.06043	5.6815	7.34616e-07	1.58448e-05
chr2:65084709:65087992	chr2	65084709	65087992	3284	0.83083	6.40937	7.47049e-07	1.6082e-05
chr2:27928415:27930010	chr2	27928415	27930010	1596	1.12628	5.27353	7.49683e-07	1.61232e-05
chr14:94839234:94840659	chr14	94839234	94840659	1426	1.4266	4.56303	7.63722e-07	1.63937e-05
chr7:80511650:80515458	chr7	80511650	80515458	3809	0.89469	6.23966	7.6704e-07	1.64492e-05
chr19:18483210:18486586	chr19	18483210	18486586	3377	0.870138	6.41532	7.81146e-07	1.67197e-05
chr10:93168974:93169870	chr10	93168974	93169870	897	2.27328	3.46498	8.00804e-07	1.71077e-05
chr1:94244146:94246719	chr1	94244146	94246719	2574	0.948348	6.461	8.03486e-07	1.71324e-05
chr4:96431107:96433114	chr4	96431107	96433114	2008	1.38657	4.83135	8.23591e-07	1.75124e-05
chr2:235111279:235113098	chr2	235111279	235113098	1820	1.30691	4.87293	8.48262e-07	1.79674e-05
chr20:22359423:22360944	chr20	22359423	22360944	1522	1.09363	5.56615	8.56925e-07	1.81338e-05
chr16:27728724:27730651	chr16	27728724	27730651	1928	1.83243	4.04917	8.5936e-07	1.8151e-05
chr8:128303877:128313760	chr8	128303877	128313760	9884	0.732206	9.39705	8.97856e-07	1.89463e-05
chr6:30709814:30718718	chr6	30709814	30718718	8905	0.714644	8.03781	8.9988e-07	1.89533e-05
chr1:241746296:241746811	chr1	241746296	241746811	516	3.13774	2.71546	9.22708e-07	1.94159e-05
chr13:44874476:44878277	chr13	44874476	44878277	3802	0.80109	6.71606	9.23608e-07	1.94166e-05
chr8:129195166:129196038	chr8	129195166	129196038	873	1.72683	4.12229	9.49055e-07	1.98955e-05
chr8:109960704:109961937	chr8	109960704	109961937	1234	1.75125	3.95464	9.64358e-07	2.01974e-05
chr5:140893548:140895381	chr5	140893548	140895381	1834	1.4566	4.51008	9.69152e-07	2.02789e-05
chr19:35809213:35811479	chr19	35809213	35811479	2267	1.03036	5.55261	9.71097e-07	2.03006e-05
chr12:111846563:111848987	chr12	111846563	111848987	2425	1.11717	5.28709	9.7266e-07	2.03144e-05
chr14:94493253:94495595	chr14	94493253	94495595	2343	1.1137	5.27532	9.81232e-07	2.04553e-05
chr19:39852517:39853849	chr19	39852517	39853849	1333	1.661	4.13221	1.03203e-06	2.14344e-05
chr5:36444729:36445309	chr5	36444729	36445309	581	2.31764	3.36091	1.04015e-06	2.15831e-05
chr8:61861609:61864245	chr8	61861609	61864245	2637	1.1694	5.18566	1.06561e-06	2.20706e-05
chr2:235897308:235898435	chr2	235897308	235898435	1128	1.41425	4.43097	1.10683e-06	2.28189e-05
chr17:39197178:39197864	chr17	39197178	39197864	687	2.2938	3.35844	1.11934e-06	2.30556e-05
chr1:170776073:170777302	chr1	170776073	170777302	1230	1.95937	3.79008	1.12334e-06	2.31167e-05
chr17:55600669:55602517	chr17	55600669	55602517	1849	1.10163	5.40581	1.1553e-06	2.37307e-05
chr15:63845572:63846176	chr15	63845572	63846176	605	2.96229	2.93021	1.1794e-06	2.42036e-05
chr5:87733300:87734608	chr5	87733300	87734608	1309	1.45063	4.39087	1.21232e-06	2.47883e-05
chr7:83866573:83867603	chr7	83866573	83867603	1031	1.71381	3.90406	1.21133e-06	2.47883e-05
chr1:32419771:32422348	chr1	32419771	32422348	2578	0.920355	6.23685	1.24657e-06	2.54422e-05
chr6:64223909:64227098	chr6	64223909	64227098	3190	0.990528	5.76928	1.24633e-06	2.54422e-05
chr7:93811451:93813850	chr7	93811451	93813850	2400	1.04641	5.75597	1.24909e-06	2.54705e-05
chr12:92080743:92081501	chr12	92080743	92081501	759	2.86064	3.2521	1.25545e-06	2.5577e-05
chr18:56247979:56249206	chr18	56247979	56249206	1228	1.38307	4.76216	1.26379e-06	2.57001e-05
chr16:86386854:86390692	chr16	86386854	86390692	3839	0.741519	6.92491	1.26988e-06	2.58006e-05
chr11:119186176:119188588	chr11	119186176	119188588	2413	1.14577	5.10291	1.30491e-06	2.64883e-05
chr10:21593026:21593742	chr10	21593026	21593742	717	2.07368	3.56886	1.31077e-06	2.65832e-05
chr17:61350817:61354775	chr17	61350817	61354775	3959	0.743581	7.31179	1.34684e-06	2.72161e-05
chr8:128216799:128247974	chr8	128216799	128247974	31176	0.71742	11.2835	1.34592e-06	2.72161e-05
chr9:75155042:75155797	chr9	75155042	75155797	756	2.40149	3.27296	1.37509e-06	2.7737e-05
chr10:22937289:22938750	chr10	22937289	22938750	1462	2.22075	3.58575	1.37957e-06	2.78024e-05
chr17:69627075:69629110	chr17	69627075	69629110	2036	0.950278	5.6063	1.40612e-06	2.82865e-05
chr16:16090025:16092963	chr16	16090025	16092963	2939	0.795041	6.48537	1.44947e-06	2.90803e-05
chr7:2349202:2351028	chr7	2349202	2351028	1827	0.867953	5.96649	1.45459e-06	2.91308e-05
chr19:18487528:18492405	chr19	18487528	18492405	4878	0.789501	6.76829	1.45635e-06	2.914e-05
chr3:193570787:193571677	chr3	193570787	193571677	891	2.53797	3.29416	1.46884e-06	2.93636e-05
chr3:48074740:48076636	chr3	48074740	48076636	1897	1.02501	5.71421	1.50632e-06	3.00861e-05
chr6:45491967:45492984	chr6	45491967	45492984	1018	2.01455	3.86115	1.51598e-06	3.0252e-05
chr1:41384408:41386003	chr1	41384408	41386003	1596	1.21684	5.07745	1.52327e-06	3.03434e-05
chr12:31738282:31738833	chr12	31738282	31738833	552	1.94827	3.65414	1.52526e-06	3.03563e-05
chr1:30181136:30183443	chr1	30181136	30183443	2308	1.13592	5.31245	1.54885e-06	3.07983e-05
chr5:127772125:127773691	chr5	127772125	127773691	1567	1.66031	4.01146	1.56325e-06	3.10572e-05
chr9:124526229:124528201	chr9	124526229	124528201	1973	1.24295	4.83192	1.62613e-06	3.22207e-05
chr3:63037308:63038131	chr3	63037308	63038131	824	2.24075	3.58348	1.63295e-06	3.23272e-05
chr8:32571973:32574225	chr8	32571973	32574225	2253	1.35019	4.90464	1.74839e-06	3.44302e-05
chr9:127029292:127029985	chr9	127029292	127029985	694	2.29143	3.26323	1.76121e-06	3.4652e-05
chrX:140314518:140315073	chrX	140314518	140315073	556	3.34931	2.67792	1.763e-06	3.4657e-05
chr10:112176251:112178324	chr10	112176251	112178324	2074	0.862252	6.18105	1.7662e-06	3.46589e-05
chr1:227583190:227585547	chr1	227583190	227585547	2358	1.11448	5.27264	1.86406e-06	3.64835e-05
chr7:80536209:80537550	chr7	80536209	80537550	1342	3.08679	2.67417	1.8854e-06	3.68689e-05
chr11:73848840:73851502	chr11	73848840	73851502	2663	0.758134	6.93202	1.89447e-06	3.7014e-05
chr22:43716889:43717348	chr22	43716889	43717348	460	2.90691	2.86932	1.92426e-06	3.75306e-05
chr11:73737517:73738645	chr11	73737517	73738645	1129	1.53029	4.39574	1.92814e-06	3.75737e-05
chr1:205262693:205264987	chr1	205262693	205264987	2295	1.01493	5.59616	1.93498e-06	3.76279e-05
chr9:100908134:100909170	chr9	100908134	100909170	1037	1.92275	3.62052	1.93596e-06	3.76279e-05
chr9:67292152:67294717	chr9	67292152	67294717	2566	0.822981	6.86617	1.9802e-06	3.83877e-05
chr1:203146180:203147654	chr1	203146180	203147654	1475	1.50335	4.25266	1.99251e-06	3.85597e-05
chr10:132892387:132893755	chr10	132892387	132893755	1369	2.13664	3.54715	2.00059e-06	3.86493e-05
chr2:20783048:20785478	chr2	20783048	20785478	2431	0.825679	6.39049	2.02271e-06	3.90095e-05
chr7:16357979:16359666	chr7	16357979	16359666	1688	1.16905	5.182	2.0508e-06	3.95172e-05
chr16:2888236:2889395	chr16	2888236	2889395	1160	1.61405	4.36565	2.06577e-06	3.97372e-05
chr4:84127572:84130734	chr4	84127572	84130734	3163	0.89544	6.8041	2.08139e-06	3.99691e-05
chr6:116465684:116466235	chr6	116465684	116466235	552	2.35649	3.2188	2.08114e-06	3.99691e-05
chr20:56706626:56707168	chr20	56706626	56707168	543	2.97292	2.77162	2.10586e-06	4.03698e-05
chr2:235788092:235791031	chr2	235788092	235791031	2940	0.950898	5.64956	2.12363e-06	4.06756e-05
chr3:66101130:66102761	chr3	66101130	66102761	1632	1.39053	4.50706	2.13098e-06	4.07816e-05
chr21:19272729:19273613	chr21	19272729	19273613	885	3.03562	2.6304	2.13315e-06	4.07883e-05
chr12:109225993:109235592	chr12	109225993	109235592	9600	0.684858	8.83786	2.14929e-06	4.10269e-05
chr9:97674066:97677961	chr9	97674066	97677961	3896	0.756241	6.61699	2.15266e-06	4.10562e-05
chr3:30383542:30386071	chr3	30383542	30386071	2530	1.01315	5.66274	2.15924e-06	4.11468e-05
chrX:45364078:45369754	chrX	45364078	45369754	5677	0.709731	7.32098	2.20815e-06	4.20073e-05
chr14:75045406:75047408	chr14	75045406	75047408	2003	1.40796	5.22795	2.21939e-06	4.21854e-05
chr1:17533945:17535530	chr1	17533945	17535530	1586	1.55936	4.08944	2.22167e-06	4.21929e-05
chr22:39570133:39572617	chr22	39570133	39572617	2485	0.976305	5.56844	2.23849e-06	4.24763e-05
chr8:29627454:29629037	chr8	29627454	29629037	1584	1.17264	5.07224	2.24409e-06	4.25466e-05
chr3:124856279:124856877	chr3	124856279	124856877	599	1.99445	3.61792	2.25085e-06	4.26387e-05
chr6:105765989:105767952	chr6	105765989	105767952	1964	1.26576	4.83236	2.3006e-06	4.35443e-05
chr18:28978789:28980486	chr18	28978789	28980486	1698	1.02251	5.37095	2.3051e-06	4.35927e-05
chr1:235115739:235117461	chr1	235115739	235117461	1723	1.1834	5.18202	2.35771e-06	4.4475e-05
chr2:139879756:139880866	chr2	139879756	139880866	1111	2.14251	3.73558	2.36939e-06	4.45523e-05
chr22:36940148:36941208	chr22	36940148	36941208	1061	3.31351	3.8109	2.36976e-06	4.45523e-05
chr3:156531544:156539158	chr3	156531544	156539158	7615	0.656675	8.53989	2.36961e-06	4.45523e-05
chr22:39464108:39464878	chr22	39464108	39464878	771	2.01003	3.6797	2.37716e-06	4.46539e-05
chr10:74069992:74071053	chr10	74069992	74071053	1062	1.41311	4.43461	2.3935e-06	4.48267e-05
chr14:35804263:35807341	chr14	35804263	35807341	3079	0.83295	6.0475	2.39319e-06	4.48267e-05
chr4:182470178:182471718	chr4	182470178	182471718	1541	1.28844	4.82793	2.39436e-06	4.48267e-05
chr7:123885684:123887260	chr7	123885684	123887260	1577	1.46448	4.45527	2.39352e-06	4.48267e-05
chr12:133030040:133030536	chr12	133030040	133030536	497	2.40918	3.09704	2.55796e-06	4.77302e-05
chr2:235871463:235874269	chr2	235871463	235874269	2807	0.837565	6.16131	2.55795e-06	4.77302e-05
chr14:75534809:75537067	chr14	75534809	75537067	2259	0.938197	5.86125	2.59032e-06	4.82537e-05
chr11:64267069:64267512	chr11	64267069	64267512	444	3.31151	2.39418	2.69853e-06	5.00613e-05
chr1:205902383:205903780	chr1	205902383	205903780	1398	2.03507	3.6539	2.72172e-06	5.0408e-05
chr2:96098850:96102583	chr2	96098850	96102583	3734	0.783793	6.9016	2.72848e-06	5.04915e-05
chr1:218831429:218835350	chr1	218831429	218835350	3922	0.712853	6.97599	2.80549e-06	5.17457e-05
chr3:106926629:106927501	chr3	106926629	106927501	873	1.53739	4.21615	2.81306e-06	5.18427e-05
chr6:48077246:48079744	chr6	48077246	48079744	2499	1.40555	4.45359	2.84169e-06	5.231e-05
chr17:49025868:49029112	chr17	49025868	49029112	3245	0.800316	6.79175	2.85441e-06	5.24753e-05
chr15:77799355:77801582	chr15	77799355	77801582	2228	1.12887	5.35999	2.86448e-06	5.26172e-05
chr11:69234412:69236866	chr11	69234412	69236866	2455	0.917773	5.76068	2.89463e-06	5.30841e-05
chr11:61496039:61497145	chr11	61496039	61497145	1107	1.69385	3.97422	2.90656e-06	5.32591e-05
chr17:46316009:46322835	chr17	46316009	46322835	6827	0.680852	7.82437	2.91571e-06	5.33748e-05
chr7:40756618:40757818	chr7	40756618	40757818	1201	1.39005	4.65126	2.91763e-06	5.33748e-05
chr16:75322160:75323702	chr16	75322160	75323702	1543	1.37602	4.68915	2.92062e-06	5.33858e-05
chr11:73858208:73859775	chr11	73858208	73859775	1568	1.40774	4.37195	2.93012e-06	5.35159e-05
chr2:38303057:38305235	chr2	38303057	38305235	2179	1.02442	5.29983	2.93522e-06	5.35653e-05
chr14:50506404:50508270	chr14	50506404	50508270	1867	1.23659	4.84069	2.94486e-06	5.36975e-05
chr17:39239335:39241661	chr17	39239335	39241661	2327	0.854374	6.00216	3.05988e-06	5.57043e-05
chr10:115510874:115511711	chr10	115510874	115511711	838	2.58366	3.24841	3.0895e-06	5.61978e-05
chr14:65943923:65946274	chr14	65943923	65946274	2352	1.19476	4.78946	3.09751e-06	5.62978e-05
chr4:157700142:157702389	chr4	157700142	157702389	2248	1.20783	4.85533	3.13921e-06	5.70095e-05
chr9:4297038:4299723	chr9	4297038	4299723	2686	0.991088	5.41975	3.16705e-06	5.74685e-05
chr1:205640155:205641889	chr1	205640155	205641889	1735	1.22751	4.67699	3.177e-06	5.75559e-05
chr6:55733294:55734674	chr6	55733294	55734674	1381	1.64841	4.03222	3.19302e-06	5.77993e-05
chr7:17462280:17462862	chr7	17462280	17462862	583	2.53816	2.86966	3.20014e-06	5.78348e-05
chr17:39702804:39706479	chr17	39702804	39706479	3676	0.991005	6.67373	3.28563e-06	5.9332e-05
chr6:1199698:1202044	chr6	1199698	1202044	2347	1.00142	5.46492	3.30606e-06	5.96529e-05
chr15:101272119:101274979	chr15	101272119	101274979	2861	0.79853	6.62266	3.37845e-06	6.0812e-05
chr6:19438518:19439229	chr6	19438518	19439229	712	2.44722	3.02606	3.46381e-06	6.2293e-05
chr2:223897092:223898067	chr2	223897092	223898067	976	1.85094	3.79866	3.5074e-06	6.29814e-05
chr22:32041640:32043988	chr22	32041640	32043988	2349	0.780776	6.26095	3.53761e-06	6.34224e-05
chr5:148289442:148291059	chr5	148289442	148291059	1618	1.41022	4.8199	3.5679e-06	6.39142e-05
chr2:28202102:28203824	chr2	28202102	28203824	1723	1.2591	4.85632	3.61606e-06	6.47251e-05
chr1:172852274:172858125	chr1	172852274	172858125	5852	0.682755	7.72798	3.62411e-06	6.48175e-05
chr2:27937251:27938816	chr2	27937251	27938816	1566	1.51945	4.25284	3.64138e-06	6.50225e-05
chr20:49287015:49287318	chr20	49287015	49287318	304	2.80746	2.65372	3.65139e-06	6.51494e-05
chr17:57838405:57840659	chr17	57838405	57840659	2255	0.844063	6.45278	3.66553e-06	6.53496e-05
chr7:83720589:83721880	chr7	83720589	83721880	1292	1.45809	4.28296	3.67e-06	6.53774e-05
chr5:131761497:131763518	chr5	131761497	131763518	2022	1.37901	4.84523	3.69573e-06	6.57835e-05
chr14:71221520:71223044	chr14	71221520	71223044	1525	1.00536	5.32331	3.7694e-06	6.68293e-05
chr8:74002200:74003655	chr8	74002200	74003655	1456	1.10526	5.14873	3.85849e-06	6.82468e-05
chr17:49020935:49022496	chr17	49020935	49022496	1562	1.40851	4.26638	3.9721e-06	6.98702e-05
chr20:51540759:51541757	chr20	51540759	51541757	999	1.90214	3.49525	4.11263e-06	7.21159e-05
chr1:164580194:164582639	chr1	164580194	164582639	2446	0.944657	5.45201	4.15969e-06	7.27241e-05
chr9:78579227:78580146	chr9	78579227	78580146	920	1.54133	3.95482	4.15857e-06	7.27241e-05
chr8:41675624:41677250	chr8	41675624	41677250	1627	1.27215	4.75806	4.16595e-06	7.27662e-05
chr12:43353854:43356367	chr12	43353854	43356367	2514	0.88172	5.70203	4.22231e-06	7.36931e-05
chr6:161724895:161725784	chr6	161724895	161725784	890	2.56659	3.31456	4.23127e-06	7.3792e-05
chr12:115351631:115352656	chr12	115351631	115352656	1026	1.6483	3.95929	4.3178e-06	7.52425e-05
chr1:20084850:20085653	chr1	20084850	20085653	804	2.01071	3.39238	4.44423e-06	7.73255e-05
chr4:157694726:157696292	chr4	157694726	157696292	1567	1.27795	4.4778	4.46185e-06	7.75116e-05
chr22:46034440:46036219	chr22	46034440	46036219	1780	1.26933	5.04571	4.49198e-06	7.78541e-05
chr5:75984757:75986422	chr5	75984757	75986422	1666	1.16671	5.00835	4.49006e-06	7.78541e-05
chr2:196276017:196276701	chr2	196276017	196276701	685	2.525	2.85139	4.55747e-06	7.8928e-05
chr17:55979534:55982541	chr17	55979534	55982541	3008	0.81098	6.11221	4.57103e-06	7.90408e-05
chr2:17622353:17623086	chr2	17622353	17623086	734	1.98598	3.38456	4.62711e-06	7.98257e-05
chr9:130712367:130713711	chr9	130712367	130713711	1345	1.35675	4.50545	4.66723e-06	8.0394e-05
chr16:11876672:11877986	chr16	11876672	11877986	1315	2.25763	3.83277	4.7196e-06	8.12273e-05
chr4:31615571:31616303	chr4	31615571	31616303	733	2.14198	3.28891	4.72286e-06	8.12273e-05
chr9:111797362:111802520	chr9	111797362	111802520	5159	0.661101	7.18102	4.73841e-06	8.14323e-05
chr16:27773695:27774718	chr16	27773695	27774718	1024	2.03095	3.4216	4.75231e-06	8.16086e-05
chr8:94847935:94852671	chr8	94847935	94852671	4737	0.725621	8.12651	4.7775e-06	8.19157e-05
chr1:212768088:212771342	chr1	212768088	212771342	3255	0.968589	6.12576	4.78243e-06	8.19375e-05
chr21:35917046:35918310	chr21	35917046	35918310	1265	1.40862	4.22118	4.80701e-06	8.22957e-05
chr2:227291806:227293356	chr2	227291806	227293356	1551	0.890812	5.74978	4.92354e-06	8.42263e-05
chr1:76138161:76139389	chr1	76138161	76139389	1229	1.26153	4.77538	4.95825e-06	8.46908e-05
chr10:91985688:91988538	chr10	91985688	91988538	2851	0.788993	6.70876	4.97047e-06	8.47271e-05
chr11:86436973:86437977	chr11	86436973	86437977	1005	1.7543	3.73329	4.96584e-06	8.47271e-05
chr5:62558043:62558819	chr5	62558043	62558819	777	2.26848	3.07959	5.01274e-06	8.53614e-05
chr2:235958968:235960339	chr2	235958968	235960339	1372	1.1225	4.89212	5.22385e-06	8.88213e-05
chr2:157912101:157913373	chr2	157912101	157913373	1273	1.56384	3.94079	5.23926e-06	8.89483e-05
chr2:227192294:227192913	chr2	227192294	227192913	620	2.00564	3.45243	5.23713e-06	8.89483e-05
chr19:13162194:13167939	chr19	13162194	13167939	5746	0.65032	7.96508	5.24519e-06	8.89816e-05
chr6:53222901:53225570	chr6	53222901	53225570	2670	0.7812	6.39491	5.2517e-06	8.90246e-05
chr2:204624039:204624716	chr2	204624039	204624716	678	2.51873	2.85631	5.28652e-06	8.95472e-05
chr2:91786530:91787855	chr2	91786530	91787855	1326	1.2417	4.8783	5.5186e-06	9.31263e-05
chr22:30630470:30633558	chr22	30630470	30633558	3089	0.845814	6.10828	5.55308e-06	9.36378e-05
chr1:64342807:64343982	chr1	64342807	64343982	1176	1.42128	4.35524	5.68106e-06	9.57238e-05
chr3:5035102:5038634	chr3	5035102	5038634	3533	0.764845	6.8983	5.98188e-06	0.00010049
chr9:113514652:113516298	chr9	113514652	113516298	1647	1.16167	4.8535	6.01026e-06	0.000100816
chr17:786177:787291	chr17	786177	787291	1115	1.23987	4.51645	6.04934e-06	0.00010132
chr4:102033362:102050743	chr4	102033362	102050743	17382	0.655581	9.96446	6.15712e-06	0.000103048
chr1:244006184:244006566	chr1	244006184	244006566	383	3.23583	2.34313	6.21696e-06	0.000103817
chr6:21220202:21220786	chr6	21220202	21220786	585	2.59768	2.79355	6.26151e-06	0.000104483
chr7:99552772:99553954	chr7	99552772	99553954	1183	2.83688	3.33797	6.27506e-06	0.000104631
chr9:42853116:42855746	chr9	42853116	42855746	2631	0.866797	6.18018	6.2951e-06	0.000104887
chr3:30637295:30642661	chr3	30637295	30642661	5367	0.659604	7.34688	6.40482e-06	0.000106557
chr11:105806371:105809291	chr11	105806371	105809291	2921	0.93625	5.4963	6.54785e-06	0.000108856
chr3:134030722:134033440	chr3	134030722	134033440	2719	0.883747	5.5858	6.6046e-06	0.000109557
chr8:18577225:18579145	chr8	18577225	18579145	1921	1.46701	4.48657	6.68269e-06	0.000110769
chr21:36598117:36599562	chr21	36598117	36599562	1446	1.7649	3.77543	6.79519e-06	0.000112467
chr9:72645822:72646856	chr9	72645822	72646856	1035	1.69152	3.76371	6.8163e-06	0.00011265
chr12:124994051:124994829	chr12	124994051	124994829	779	1.9887	3.37923	6.8348e-06	0.000112789
chr9:72668473:72669653	chr9	72668473	72669653	1181	1.40356	4.24481	6.832e-06	0.000112789
chr17:60901700:60902740	chr17	60901700	60902740	1041	1.4954	4.05174	6.87025e-06	0.000113208
chr2:114045226:114047335	chr2	114045226	114047335	2110	0.907107	5.67191	6.96783e-06	0.000114731
chr6:119561392:119563555	chr6	119561392	119563555	2164	0.920032	5.54854	7.04126e-06	0.00011577
chr17:62984908:62985693	chr17	62984908	62985693	786	1.80927	3.64849	7.09692e-06	0.0001166
chr15:59575323:59578892	chr15	59575323	59578892	3570	0.68466	6.79127	7.29294e-06	0.000119557
chr2:20713948:20715645	chr2	20713948	20715645	1698	1.09538	5.18078	7.30942e-06	0.00011974
chr4:153617742:153619077	chr4	153617742	153619077	1336	1.67519	4.03625	7.31558e-06	0.000119753
chr3:185677466:185678436	chr3	185677466	185678436	971	1.6486	3.97406	7.33186e-06	0.000119932
chr6:98426815:98427963	chr6	98426815	98427963	1149	2.02634	3.37067	7.34556e-06	0.000120069
chr3:41013133:41013729	chr3	41013133	41013729	597	2.54273	2.75822	7.47912e-06	0.000122074
chr17:67603120:67604408	chr17	67603120	67604408	1289	1.71803	3.83179	7.53572e-06	0.000122908
chr9:67017583:67019947	chr9	67017583	67019947	2365	1.01194	5.2573	7.54214e-06	0.000122923
chr14:93545113:93545855	chr14	93545113	93545855	743	1.88353	3.38079	7.60751e-06	0.000123898
chr1:78001353:78003998	chr1	78001353	78003998	2646	0.927059	5.94806	7.63698e-06	0.000124288
chr5:83220700:83221861	chr5	83220700	83221861	1162	2.2533	3.39416	7.64617e-06	0.000124347
chr2:238110274:238111617	chr2	238110274	238111617	1344	1.29818	4.38157	8.1208e-06	0.000131684
chr4:143288512:143289048	chr4	143288512	143289048	537	2.3296	2.9436	8.13477e-06	0.000131815
chr6:6824042:6827824	chr6	6824042	6827824	3783	1.0271	6.51039	8.1768e-06	0.000132209
chr2:63779954:63780407	chr2	63779954	63780407	454	2.77861	2.62901	8.18448e-06	0.000132238
chr5:125086315:125086902	chr5	125086315	125086902	588	2.39321	2.98525	8.43262e-06	0.000135758
chr3:171358283:171358675	chr3	171358283	171358675	393	2.62139	2.67449	8.54144e-06	0.000137312
chr17:39078121:39079926	chr17	39078121	39079926	1806	0.978009	5.22385	8.55074e-06	0.000137364
chr8:126705357:126715151	chr8	126705357	126715151	9795	0.603797	8.99319	8.55997e-06	0.000137413
chr11:94469779:94472037	chr11	94469779	94472037	2259	0.829218	6.04852	8.58823e-06	0.000137641
chr4:40579041:40580055	chr4	40579041	40580055	1015	1.42069	4.14803	8.60486e-06	0.000137641
chr7:2000968:2002499	chr7	2000968	2002499	1532	1.79262	3.75411	8.59301e-06	0.000137641
chr17:74542628:74543180	chr17	74542628	74543180	553	2.4606	2.81589	8.7049e-06	0.000139142
chr14:54570204:54578734	chr14	54570204	54578734	8531	0.625893	8.46385	8.98683e-06	0.000143342
chr12:19584337:19585690	chr12	19584337	19585690	1354	1.38875	4.19512	9.24814e-06	0.000146986
chr4:157243455:157244201	chr4	157243455	157244201	747	2.08807	3.11041	9.35599e-06	0.000148385
chr1:110778303:110779455	chr1	110778303	110779455	1153	1.60262	3.85649	9.51038e-06	0.00015062
chr18:47248612:47254391	chr18	47248612	47254391	5780	0.602866	7.64068	9.55098e-06	0.000151156
chr17:839881:842210	chr17	839881	842210	2330	0.975273	5.70837	9.5996e-06	0.000151819
chr17:75249758:75252496	chr17	75249758	75252496	2739	0.70519	6.76977	9.73054e-06	0.000153673
chr1:65638331:65645233	chr1	65638331	65645233	6903	0.648253	7.49613	9.85858e-06	0.000155476
chr7:16523332:16525885	chr7	16523332	16525885	2554	0.769024	6.43338	1.00027e-05	0.000157527
chr1:25493351:25495618	chr1	25493351	25495618	2268	0.850347	5.64128	1.00286e-05	0.000157602
chr10:126791493:126792926	chr10	126791493	126792926	1434	1.49513	3.9674	1.00226e-05	0.000157602
chr3:14658460:14659149	chr3	14658460	14659149	690	2.12137	3.06275	1.00268e-05	0.000157602
chr20:22354239:22358181	chr20	22354239	22358181	3943	0.697447	6.58942	1.03793e-05	0.000162885
chr11:67775913:67782678	chr11	67775913	67782678	6766	0.643232	7.82379	1.03995e-05	0.000163088
chr11:95979272:95980858	chr11	95979272	95980858	1587	1.12965	4.81263	1.05195e-05	0.00016474
chr7:17572467:17573022	chr7	17572467	17573022	556	2.31885	3.22215	1.05368e-05	0.000164779
chr9:97615951:97617355	chr9	97615951	97617355	1405	1.36837	4.2856	1.05777e-05	0.000165305
chr5:166721859:166722560	chr5	166721859	166722560	702	1.70556	3.76551	1.06163e-05	0.000165677
chr19:18474007:18478285	chr19	18474007	18478285	4279	0.76851	6.8353	1.06731e-05	0.000166331
chr10:114389731:114394448	chr10	114389731	114394448	4718	0.651845	7.22673	1.07011e-05	0.000166651
chr15:67042261:67045316	chr15	67042261	67045316	3056	0.769315	6.01814	1.08702e-05	0.000169168
chr20:35921399:35924789	chr20	35921399	35924789	3391	0.723667	6.80604	1.09496e-05	0.000170166
chr1:42418442:42422516	chr1	42418442	42422516	4075	0.610038	7.41356	1.11199e-05	0.000172575
chr7:83689923:83691248	chr7	83689923	83691248	1326	1.66312	3.7062	1.11974e-05	0.000173656
chr16:75276931:75282385	chr16	75276931	75282385	5455	0.660204	7.50994	1.12445e-05	0.000174267
chr15:73680136:73681333	chr15	73680136	73681333	1198	1.38729	4.066	1.13147e-05	0.000175234
chr9:112777737:112779651	chr9	112777737	112779651	1915	0.934746	5.39943	1.13901e-05	0.000176157
chr5:93553751:93554618	chr5	93553751	93554618	868	1.94802	3.31723	1.1408e-05	0.000176313
chr1:224730236:224731651	chr1	224730236	224731651	1416	1.18445	4.8831	1.14508e-05	0.000176853
chr13:34511139:34512891	chr13	34511139	34512891	1753	1.3151	4.45876	1.1557e-05	0.000178159
chr16:71559846:71560890	chr16	71559846	71560890	1045	1.46813	4.11296	1.16622e-05	0.000179621
chr17:63779311:63782217	chr17	63779311	63782217	2907	0.701445	6.72175	1.17494e-05	0.000180841
chr6:45664610:45665185	chr6	45664610	45665185	576	2.82878	2.49552	1.176e-05	0.000180879
chr5:67065360:67071161	chr5	67065360	67071161	5802	0.642918	7.5396	1.19846e-05	0.000183956
chr6:119642912:119644567	chr6	119642912	119644567	1656	1.3187	4.40929	1.20247e-05	0.000184444
chr9:93892960:93894743	chr9	93892960	93894743	1784	1.0333	4.9267	1.23393e-05	0.000188882
chr2:217460488:217462970	chr2	217460488	217462970	2483	0.936348	5.59115	1.23989e-05	0.000189665
chr1:56922047:56923046	chr1	56922047	56923046	1000	1.52464	3.88005	1.25008e-05	0.000190833
chr4:157684166:157686798	chr4	157684166	157686798	2633	1.47797	4.23324	1.27185e-05	0.000193629
chr19:18131847:18134168	chr19	18131847	18134168	2322	0.776918	5.95943	1.27823e-05	0.000194468
chr13:77096283:77096785	chr13	77096283	77096785	503	2.25987	2.98481	1.28436e-05	0.000195136
chr21:32091450:32092037	chr21	32091450	32092037	588	2.42895	2.79357	1.30008e-05	0.000197039
chr5:413093:415254	chr5	413093	415254	2162	1.11418	4.80572	1.30402e-05	0.000197454
chr6:30773032:30774066	chr6	30773032	30774066	1035	1.52162	4.05034	1.3097e-05	0.00019818
chr8:59048871:59049522	chr8	59048871	59049522	652	1.94343	3.2928	1.32596e-05	0.000200369
chr9:114812924:114813384	chr9	114812924	114813384	461	2.81728	2.4928	1.33596e-05	0.000201713
chr11:45001288:45001876	chr11	45001288	45001876	589	2.72507	2.58212	1.34521e-05	0.000202731
chr8:40957620:40959114	chr8	40957620	40959114	1495	1.14963	4.74706	1.35557e-05	0.000204096
chr9:116310241:116310916	chr9	116310241	116310916	676	2.05729	3.09703	1.35609e-05	0.000204096
chr5:142621671:142626437	chr5	142621671	142626437	4767	0.619513	7.11776	1.40061e-05	0.000210515
chr3:15808973:15812070	chr3	15808973	15812070	3098	0.762697	6.69594	1.41733e-05	0.000212742
chr3:7381877:7382736	chr3	7381877	7382736	860	1.86299	3.4757	1.42286e-05	0.000213429
chr6:10434242:10435836	chr6	10434242	10435836	1595	1.01475	5.0544	1.43649e-05	0.00021533
chr8:89727667:89729019	chr8	89727667	89729019	1353	1.08515	4.88538	1.45032e-05	0.000217112
chr10:48334710:48337963	chr10	48334710	48337963	3254	0.771169	6.12603	1.46201e-05	0.000218571
chr6:120112630:120113531	chr6	120112630	120113531	902	1.96012	3.45936	1.50842e-05	0.000225058
chr7:105469051:105472759	chr7	105469051	105472759	3709	0.69661	6.36622	1.53482e-05	0.00022854
chr2:113482907:113484639	chr2	113482907	113484639	1733	1.13889	4.94275	1.54369e-05	0.000229556
chr14:31743090:31743796	chr14	31743090	31743796	707	2.55139	3.18305	1.55597e-05	0.000230922
chr6:74275817:74277594	chr6	74275817	74277594	1778	1.09901	4.80827	1.56122e-05	0.000231548
chr2:28199548:28201771	chr2	28199548	28201771	2224	0.801551	5.73471	1.56741e-05	0.00023224
chr12:6323192:6327985	chr12	6323192	6327985	4794	0.640894	7.46638	1.56986e-05	0.000232368
chr3:36566727:36567249	chr3	36566727	36567249	523	2.43353	2.79753	1.58418e-05	0.000234179
chr8:90622679:90625603	chr8	90622679	90625603	2925	0.750434	6.42115	1.59505e-05	0.000235475
chr10:128209975:128210672	chr10	128209975	128210672	698	1.98236	3.34358	1.61811e-05	0.000238565
chr16:16167510:16168950	chr16	16167510	16168950	1441	1.04058	4.92277	1.61966e-05	0.000238636
chr6:116707198:116709421	chr6	116707198	116709421	2224	0.879868	5.63602	1.64725e-05	0.000242542
chr1:173164658:173165577	chr1	173164658	173165577	920	1.95904	3.22902	1.64938e-05	0.000242696
chr1:94145836:94148265	chr1	94145836	94148265	2430	0.960898	5.23548	1.65672e-05	0.000243457
chr12:123382714:123383907	chr12	123382714	123383907	1194	1.15351	4.5419	1.66067e-05	0.000243717
chr3:193993746:193996066	chr3	193993746	193996066	2321	0.974394	5.09548	1.67514e-05	0.00024568
chr7:80547639:80549001	chr7	80547639	80549001	1363	1.40062	3.95052	1.7142e-05	0.000250916
chr1:1013387:1015957	chr1	1013387	1015957	2571	0.685503	6.3805	1.71748e-05	0.000251232
chr2:219161635:219163365	chr2	219161635	219163365	1731	1.07006	4.90149	1.73804e-05	0.000254074
chr4:53688820:53690117	chr4	53688820	53690117	1298	1.18905	4.42537	1.75723e-05	0.00025621
chr9:14221210:14222588	chr9	14221210	14222588	1379	1.01773	4.95174	1.7572e-05	0.00025621
chr8:8125780:8126921	chr8	8125780	8126921	1142	1.15387	4.83197	1.77262e-05	0.000258287
chr13:45778775:45782864	chr13	45778775	45782864	4090	0.662748	6.66949	1.78188e-05	0.000259298
chr20:48754393:48756703	chr20	48754393	48756703	2311	1.03004	5.09759	1.78778e-05	0.000259988
chr3:194838164:194841272	chr3	194838164	194841272	3109	0.75422	6.53609	1.79022e-05	0.000260173
chr2:235877497:235879879	chr2	235877497	235879879	2383	0.833848	5.6459	1.79583e-05	0.000260821
chr7:44952335:44953284	chr7	44952335	44953284	950	1.90686	3.26992	1.80035e-05	0.000261307
chr16:57350322:57351471	chr16	57350322	57351471	1150	1.9557	4.73911	1.80496e-05	0.000261638
chr7:25009487:25013261	chr7	25009487	25013261	3775	0.703187	6.50804	1.81925e-05	0.000263368
chr6:117558236:117559392	chr6	117558236	117559392	1157	1.76197	3.61582	1.83829e-05	0.000265953
chr22:27870681:27873419	chr22	27870681	27873419	2739	0.853001	5.44397	1.85917e-05	0.000268627
chr3:171873570:171874882	chr3	171873570	171874882	1313	1.19545	4.49539	1.91081e-05	0.000275378
chr7:151294190:151299891	chr7	151294190	151299891	5702	0.622612	7.60154	1.91361e-05	0.000275605
chr3:152855217:152859188	chr3	152855217	152859188	3972	0.754567	6.66369	1.9176e-05	0.000275881
chr10:122918264:122919374	chr10	122918264	122919374	1111	1.47268	4.05862	1.94123e-05	0.000278509
chr12:13836724:13839580	chr12	13836724	13839580	2857	0.722008	6.15295	1.95403e-05	0.000279986
chr7:92956072:92956838	chr7	92956072	92956838	767	1.9999	3.20816	1.97287e-05	0.000282145
chr6:8939711:8941008	chr6	8939711	8941008	1298	1.62845	3.65463	1.97559e-05	0.000282353
chr9:70092883:70093409	chr9	70092883	70093409	527	2.00306	3.1299	1.98777e-05	0.000283732
chr10:25606640:25607434	chr10	25606640	25607434	795	1.50632	3.87185	2.0002e-05	0.000285325
chr6:21163133:21164251	chr6	21163133	21164251	1119	2.08825	3.43607	2.00491e-05	0.000285814
chr12:26150316:26151258	chr12	26150316	26151258	943	1.43812	3.92512	2.01712e-05	0.000287372
chr18:19766460:19766882	chr18	19766460	19766882	423	2.34163	3.0551	2.02057e-05	0.000287681
chr2:169012773:169014344	chr2	169012773	169014344	1572	1.10618	4.60477	2.03979e-05	0.000290049
chr17:56003434:56006192	chr17	56003434	56006192	2759	0.933203	5.17664	2.04285e-05	0.0002903
chr4:8192378:8194559	chr4	8192378	8194559	2182	0.826582	5.73394	2.05038e-05	0.000291
chr7:2295317:2295897	chr7	2295317	2295897	581	2.80503	2.46597	2.05969e-05	0.000291884
chr2:101509364:101512815	chr2	101509364	101512815	3452	0.857435	5.73792	2.06289e-05	0.000292036
chr14:54634237:54638565	chr14	54634237	54638565	4329	0.636648	6.93622	2.06718e-05	0.000292274
chr4:139031874:139034916	chr4	139031874	139034916	3043	0.796824	5.83782	2.06929e-05	0.000292388
chr6:86575404:86576491	chr6	86575404	86576491	1088	1.4836	3.77766	2.07109e-05	0.000292458
chr10:105504715:105508023	chr10	105504715	105508023	3309	0.812874	6.26483	2.09333e-05	0.000295412
chr4:79452746:79459161	chr4	79452746	79459161	6416	0.611813	7.83184	2.12079e-05	0.000298912
chr3:171526597:171528776	chr3	171526597	171528776	2180	0.852005	5.43082	2.14069e-05	0.000301336
chr14:89452101:89454333	chr14	89452101	89454333	2233	1.14469	4.52175	2.17277e-05	0.000305087
chr12:113579774:113580428	chr12	113579774	113580428	655	2.14537	2.9089	2.17484e-05	0.000305186
chr17:27434461:27435630	chr17	27434461	27435630	1170	1.19324	4.41783	2.19161e-05	0.000307346
chr14:72943191:72944712	chr14	72943191	72944712	1522	1.34893	4.20104	2.21939e-05	0.000311048
chr4:10007843:10009137	chr4	10007843	10009137	1295	1.18337	4.51623	2.22208e-05	0.00031123
chr12:13687465:13688341	chr12	13687465	13688341	877	1.40615	3.91786	2.25489e-05	0.000315432
chr17:33389620:33392211	chr17	33389620	33392211	2592	0.675717	6.38402	2.30491e-05	0.000321625
chr7:84330296:84331844	chr7	84330296	84331844	1549	0.965679	5.25739	2.30899e-05	0.000321994
chr1:173990150:173993209	chr1	173990150	173993209	3060	0.684435	6.50243	2.32958e-05	0.000324461
chr19:38421804:38425406	chr19	38421804	38425406	3603	0.694097	6.46706	2.33881e-05	0.000325544
chr3:193499563:193500791	chr3	193499563	193500791	1229	1.08288	4.71054	2.35891e-05	0.000327326
chr18:9016472:9018939	chr18	9016472	9018939	2468	0.794267	6.05655	2.36479e-05	0.00032794
chr20:34957368:34958268	chr20	34957368	34958268	901	1.41316	3.86478	2.38886e-05	0.000331072
chr6:133929959:133933003	chr6	133929959	133933003	3045	1.288	4.13831	2.42594e-05	0.000335796
chr1:238036839:238037360	chr1	238036839	238037360	522	2.07635	2.94696	2.43181e-05	0.0003364
chr14:56064861:56066944	chr14	56064861	56066944	2084	0.941421	5.21414	2.43511e-05	0.000336649
chr1:10838499:10840489	chr1	10838499	10840489	1991	0.803143	5.80887	2.43672e-05	0.000336664
chr17:75389999:75391200	chr17	75389999	75391200	1202	1.10186	4.93886	2.46126e-05	0.000339427
chr11:8720791:8722304	chr11	8720791	8722304	1514	1.02897	4.80811	2.52469e-05	0.000347158
chr1:46686231:46686991	chr1	46686231	46686991	761	1.51546	3.91885	2.52874e-05	0.000347449
chr20:23123113:23124323	chr20	23123113	23124323	1211	1.10969	4.76826	2.5444e-05	0.000349387
chr1:155978196:155979252	chr1	155978196	155979252	1057	1.67695	3.68134	2.55688e-05	0.000350643
chr2:196311711:196313386	chr2	196311711	196313386	1676	1.64242	3.78346	2.65197e-05	0.000362161
chr17:63746439:63747566	chr17	63746439	63747566	1128	1.38761	4.18605	2.72663e-05	0.000370895
chr11:73844820:73848462	chr11	73844820	73848462	3643	0.761041	6.04993	2.74453e-05	0.000372984
chr10:12497245:12498314	chr10	12497245	12498314	1070	1.36738	4.05979	2.7469e-05	0.000373078
chr2:139704896:139708323	chr2	139704896	139708323	3428	0.675529	6.42814	2.75398e-05	0.000373814
chr11:34645376:34647486	chr11	34645376	34647486	2111	0.889297	5.32973	2.76238e-05	0.000374727
chr9:116339466:116344307	chr9	116339466	116344307	4842	0.632242	6.7903	2.77774e-05	0.000376584
chr8:105348912:105349507	chr8	105348912	105349507	596	1.89	3.31559	2.81747e-05	0.000381508
chr4:40630957:40633479	chr4	40630957	40633479	2523	0.746716	5.9908	2.89287e-05	0.000391008
chr11:128317767:128319541	chr11	128317767	128319541	1775	0.863825	5.34739	2.90737e-05	0.000392731
chr19:16448286:16450563	chr19	16448286	16450563	2278	0.930961	5.75106	2.93445e-05	0.000395913
chr3:168822481:168823171	chr3	168822481	168823171	691	1.62786	3.52144	2.96629e-05	0.000399877
chr19:11194452:11198203	chr19	11194452	11198203	3752	0.611513	6.83542	3.0004e-05	0.000403838
chr9:132174575:132177931	chr9	132174575	132177931	3357	0.67757	6.52613	3.01095e-05	0.000405015
chr4:84092011:84092769	chr4	84092011	84092769	759	2.39534	3.3222	3.02404e-05	0.000406287
chr5:171537922:171538883	chr5	171537922	171538883	962	2.4245	2.77479	3.0945e-05	0.000414511
chr12:83409245:83411289	chr12	83409245	83411289	2045	1.01937	4.85683	3.12805e-05	0.000418005
chr6:75905148:75910359	chr6	75905148	75910359	5212	0.657288	6.46525	3.14045e-05	0.000419413
chr13:75932942:75934003	chr13	75932942	75934003	1062	1.1279	4.51698	3.14326e-05	0.000419538
chr9:67300361:67303390	chr9	67300361	67303390	3030	0.752832	6.07744	3.16602e-05	0.000422324
chr7:46017194:46019148	chr7	46017194	46019148	1955	0.770908	5.79595	3.17518e-05	0.000423294
chr3:159135951:159137267	chr3	159135951	159137267	1317	1.59175	3.80291	3.17949e-05	0.000423617
chr8:109575232:109575937	chr8	109575232	109575937	706	1.57704	3.60735	3.19464e-05	0.000425383
chr7:13985154:13986212	chr7	13985154	13986212	1059	2.18477	3.03237	3.2052e-05	0.000426282
chr4:143640893:143643668	chr4	143640893	143643668	2776	0.73709	5.97177	3.23386e-05	0.000429584
chr4:143663920:143665061	chr4	143663920	143665061	1142	1.1585	4.37252	3.26817e-05	0.000433627
chr9:69662622:69664747	chr9	69662622	69664747	2126	0.884169	5.30597	3.27095e-05	0.00043374
chr1:56874930:56875458	chr1	56874930	56875458	529	2.34526	2.73939	3.27475e-05	0.000433987
chr4:36226581:36227794	chr4	36226581	36227794	1214	1.2311	4.28859	3.29771e-05	0.000436771
chr12:75946928:75947875	chr12	75946928	75947875	948	1.34467	4.11558	3.30142e-05	0.000437005
chr17:63429646:63430837	chr17	63429646	63430837	1192	1.3873	3.89244	3.36783e-05	0.00044422
chr12:121115486:121116470	chr12	121115486	121116470	985	1.83025	3.21986	3.37614e-05	0.000444793
chr6:19803837:19806190	chr6	19803837	19806190	2354	0.802473	5.63953	3.40242e-05	0.000447729
chr11:128365312:128368229	chr11	128365312	128368229	2918	0.654064	6.91301	3.45292e-05	0.00045342
chr5:35609232:35610006	chr5	35609232	35610006	775	2.15213	2.91151	3.45376e-05	0.00045342
chr4:96425335:96428161	chr4	96425335	96428161	2827	1.19888	4.55763	3.45903e-05	0.000453846
chr3:158887216:158888769	chr3	158887216	158888769	1554	1.28112	4.29751	3.48457e-05	0.00045693
chr19:46184646:46185670	chr19	46184646	46185670	1025	1.10184	4.54198	3.48964e-05	0.000457326
chr13:46073797:46076151	chr13	46073797	46076151	2355	0.860049	5.59473	3.54704e-05	0.000464577
chr13:51102807:51104421	chr13	51102807	51104421	1615	0.967368	5.11443	3.59421e-05	0.000469383
chr6:122115624:122116067	chr6	122115624	122116067	444	1.83384	3.156	3.58884e-05	0.000469383
chrX:133737728:133739643	chrX	133737728	133739643	1916	1.18104	4.65603	3.59203e-05	0.000469383
chr1:14672560:14673251	chr1	14672560	14673251	692	2.06174	3.01394	3.60183e-05	0.000470105
chr1:214666769:214669033	chr1	214666769	214669033	2265	0.666217	6.30718	3.62781e-05	0.00047322
chr6:36634002:36636031	chr6	36634002	36636031	2030	0.933408	5.14898	3.63155e-05	0.000473433
chr7:24826309:24827261	chr7	24826309	24827261	953	1.73378	3.38861	3.70539e-05	0.000482217
chr19:912621:913971	chr19	912621	913971	1351	0.940937	4.98877	3.71324e-05	0.000482398
chr9:124510357:124511848	chr9	124510357	124511848	1492	1.01505	4.77421	3.71186e-05	0.000482398
chr5:72617619:72618646	chr5	72617619	72618646	1028	1.78428	3.37516	3.71548e-05	0.000482409
chr16:88922514:88924564	chr16	88922514	88924564	2051	1.07573	5.07361	3.79668e-05	0.000492097
chr9:89381409:89382606	chr9	89381409	89382606	1198	1.46837	3.757	3.79571e-05	0.000492097
chr6:100746571:100749925	chr6	100746571	100749925	3355	0.660076	7.10104	3.8581e-05	0.000498904
chr17:25798326:25799488	chr17	25798326	25799488	1163	1.2507	4.2348	3.86923e-05	0.000499766
chr13:102844381:102844865	chr13	102844381	102844865	485	2.21174	2.75624	3.89284e-05	0.000502237
chr17:69185014:69185977	chr17	69185014	69185977	964	1.71448	3.5377	3.9674e-05	0.000511268
chr2:227589352:227592118	chr2	227589352	227592118	2767	0.733115	5.91584	3.98533e-05	0.000513283
chr9:3478379:3479029	chr9	3478379	3479029	651	1.62095	3.53677	4.00549e-05	0.000515287
chr1:167140393:167141362	chr1	167140393	167141362	970	1.43909	3.71769	4.02933e-05	0.000517759
chr5:57136369:57139727	chr5	57136369	57139727	3359	0.733853	6.19348	4.0862e-05	0.000524767
chr7:17272979:17275259	chr7	17272979	17275259	2281	0.763982	5.76998	4.20081e-05	0.000538251
chr18:52442306:52444706	chr18	52442306	52444706	2401	0.744633	6.07565	4.27693e-05	0.000547067
chr19:51520179:51524675	chr19	51520179	51524675	4497	0.697867	6.2703	4.45482e-05	0.00056723
chr16:70801616:70802490	chr16	70801616	70802490	875	1.85109	3.47048	4.4802e-05	0.000569815
chr1:205446732:205447745	chr1	205446732	205447745	1014	1.42541	3.80157	4.52212e-05	0.000574494
chr1:76719527:76721596	chr1	76719527	76721596	2070	0.874857	5.44743	4.55382e-05	0.000578193
chr10:91042672:91044529	chr10	91042672	91044529	1858	1.05907	4.96209	4.56733e-05	0.000579551
chr14:69042351:69044977	chr14	69042351	69044977	2627	0.805842	6.02228	4.57227e-05	0.000579551
chr4:15914977:15915994	chr4	15914977	15915994	1018	1.48571	4.15659	4.61016e-05	0.000583838
chr9:103349438:103350009	chr9	103349438	103350009	572	2.04809	2.8339	4.61131e-05	0.000583838
chr1:154998723:154999623	chr1	154998723	154999623	901	1.51963	3.82125	4.6222e-05	0.000584557
chr15:100582456:100584905	chr15	100582456	100584905	2450	0.698429	6.07044	4.62065e-05	0.000584557
chr3:98640240:98643497	chr3	98640240	98643497	3258	0.666095	6.26849	4.63017e-05	0.000585234
chr8:127518040:127519137	chr8	127518040	127519137	1098	1.0531	4.62951	4.644e-05	0.000586652
chr13:45854126:45856637	chr13	45854126	45856637	2512	0.714585	6.0724	4.67403e-05	0.000589781
chr6:41679748:41681794	chr6	41679748	41681794	2047	0.842411	5.33549	4.72649e-05	0.00059506
chr7:17410261:17412270	chr7	17410261	17412270	2010	0.791064	5.53589	4.75598e-05	0.000598101
chrX:129244938:129246265	chrX	129244938	129246265	1328	1.154	4.33691	4.75565e-05	0.000598101
chr13:111606531:111611662	chr13	111606531	111611662	5132	0.650041	7.46078	4.77946e-05	0.000600395
chr17:39584394:39585692	chr17	39584394	39585692	1299	1.19261	4.24545	4.97103e-05	0.000623047
chr8:90553435:90556917	chr8	90553435	90556917	3483	0.705514	6.3618	4.98935e-05	0.000624645
chr19:21909121:21910420	chr19	21909121	21910420	1300	1.48364	3.85583	5.06122e-05	0.000632582
chr2:173313621:173315487	chr2	173313621	173315487	1867	0.937306	5.152	5.08991e-05	0.000635813
chr10:74078493:74085645	chr10	74078493	74085645	7153	0.613147	8.00593	5.16447e-05	0.000644768
chr18:12837895:12838842	chr18	12837895	12838842	948	1.5721	3.52501	5.1947e-05	0.00064782
chr9:136746164:136746668	chr9	136746164	136746668	505	2.06634	2.75536	5.19921e-05	0.000648021
chr7:121197219:121197934	chr7	121197219	121197934	716	1.37733	3.95458	5.23172e-05	0.000651711
chr6:128921009:128922089	chr6	128921009	128922089	1081	1.56362	3.52144	5.31864e-05	0.000660702
chr1:172806462:172809955	chr1	172806462	172809955	3494	0.642343	6.57468	5.35148e-05	0.000664046
chr18:76254080:76254858	chr18	76254080	76254858	779	1.82018	3.20613	5.39631e-05	0.000669238
chr6:43977989:43979038	chr6	43977989	43979038	1050	1.36261	4.08346	5.42391e-05	0.000672289
chr10:15386489:15387455	chr10	15386489	15387455	967	1.44636	3.67609	5.44034e-05	0.000673888
chr5:131437547:131440133	chr5	131437547	131440133	2587	0.772648	5.74631	5.44282e-05	0.000673888
chr17:57930395:57931224	chr17	57930395	57931224	830	0.929978	4.94283	5.5802e-05	0.000688235
chr17:63224832:63225894	chr17	63224832	63225894	1063	1.33187	3.84716	5.6082e-05	0.000691308
chr11:69923013:69926450	chr11	69923013	69926450	3438	0.892917	5.22983	5.61458e-05	0.000691714
chr12:76730659:76736341	chr12	76730659	76736341	5683	0.623423	6.81137	5.64119e-05	0.000694229
chr17:41534183:41534748	chr17	41534183	41534748	566	2.62241	2.69348	5.67764e-05	0.000697566
chr1:202024237:202028285	chr1	202024237	202028285	4049	0.656654	6.83698	5.68348e-05	0.000697901
chr12:13679412:13680353	chr12	13679412	13680353	942	1.24511	4.14341	5.69103e-05	0.000698444
chr2:101396607:101397625	chr2	101396607	101397625	1019	1.63491	3.47574	5.69819e-05	0.000698558
chr2:47295441:47300825	chr2	47295441	47300825	5385	0.630259	6.77934	5.7051e-05	0.000699023
chr20:36754162:36755670	chr20	36754162	36755670	1509	1.15006	4.25614	5.74683e-05	0.000701833
chr4:114899642:114901500	chr4	114899642	114901500	1859	1.19926	4.26495	5.74527e-05	0.000701833
chr6:121095069:121096101	chr6	121095069	121096101	1033	1.26914	4.00507	5.76387e-05	0.000703532
chr19:41505920:41506644	chr19	41505920	41506644	725	1.577	3.85676	5.86083e-05	0.000714199
chr12:115370821:115371736	chr12	115370821	115371736	916	1.65387	3.62196	5.94525e-05	0.0007237
chr11:86406759:86407424	chr11	86406759	86407424	666	1.5307	3.67219	6.0085e-05	0.000730605
chr3:134039304:134040179	chr3	134039304	134040179	876	1.23421	4.3463	6.02359e-05	0.000732043
chr15:70766427:70768910	chr15	70766427	70768910	2484	1.0317	5.14793	6.02977e-05	0.000732396
chr1:15680372:15684568	chr1	15680372	15684568	4197	0.601254	7.27979	6.07994e-05	0.000737451
chr9:3746017:3747443	chr9	3746017	3747443	1427	1.18129	4.20636	6.08126e-05	0.000737451
chr10:17271806:17274230	chr10	17271806	17274230	2425	0.956566	4.81768	6.10001e-05	0.000738526
chr4:139080102:139080463	chr4	139080102	139080463	362	2.39358	2.77203	6.10497e-05	0.000738727
chr2:230309537:230310111	chr2	230309537	230310111	575	1.65533	3.38868	6.11644e-05	0.000739347
chr12:60366397:60368163	chr12	60366397	60368163	1767	1.20837	4.29685	6.13264e-05	0.000739938
chr17:17054092:17056144	chr17	17054092	17056144	2053	0.902846	5.06554	6.13926e-05	0.000740079
chr17:39278999:39280562	chr17	39278999	39280562	1564	1.06187	4.69248	6.25948e-05	0.000751339
chr2:27974562:27976720	chr2	27974562	27976720	2159	1.07229	5.29111	6.28862e-05	0.000754312
chr3:30749044:30750361	chr3	30749044	30750361	1318	1.6701	3.45236	6.29098e-05	0.000754312
chr8:29368141:29372146	chr8	29368141	29372146	4006	0.71036	6.76519	6.3666e-05	0.000761749
chr3:100754411:100756077	chr3	100754411	100756077	1667	0.800401	5.50232	6.38629e-05	0.00076329
chr17:45356008:45357382	chr17	45356008	45357382	1375	1.2696	3.99226	6.42179e-05	0.000766368
chr7:98415967:98418532	chr7	98415967	98418532	2566	0.68355	5.91893	6.44619e-05	0.000768808
chr13:97947499:97948496	chr13	97947499	97948496	998	1.19677	4.31409	6.4895e-05	0.000773563
chr12:84190147:84191367	chr12	84190147	84191367	1221	1.49795	3.64199	6.52702e-05	0.000777551
chr7:54845598:54846341	chr7	54845598	54846341	744	1.64556	3.33215	6.61643e-05	0.000786184
chr20:23127732:23129590	chr20	23127732	23129590	1859	1.03638	4.70647	6.63485e-05	0.000787954
chr12:120728421:120731654	chr12	120728421	120731654	3234	0.633486	6.29031	6.74162e-05	0.00079894
chr20:43035404:43037237	chr20	43035404	43037237	1834	1.07141	4.7776	6.8092e-05	0.000805671
chr15:30027241:30029701	chr15	30027241	30029701	2461	0.718247	5.87179	6.81662e-05	0.000806123
chr1:43940859:43942691	chr1	43940859	43942691	1833	0.814851	5.63986	6.96675e-05	0.000822143
chr5:172628806:172629574	chr5	172628806	172629574	769	1.54845	3.59269	6.98547e-05	0.000823918
chr6:104609956:104610793	chr6	104609956	104610793	838	1.89245	3.20451	7.09015e-05	0.000834508
chr8:53379521:53380289	chr8	53379521	53380289	769	1.96605	2.95478	7.29144e-05	0.00085685
chr5:79762935:79763522	chr5	79762935	79763522	588	2.02856	2.83445	7.29527e-05	0.00085685
chr2:88958862:88959291	chr2	88958862	88959291	430	1.895	3.13379	7.31933e-05	0.000859226
chr18:56272502:56273379	chr18	56272502	56273379	878	1.40015	3.69851	7.54059e-05	0.000881505
chr2:189167616:189169754	chr2	189167616	189169754	2139	0.9251	4.98666	7.5374e-05	0.000881505
chr4:36244808:36247529	chr4	36244808	36247529	2722	0.810477	5.83194	7.57456e-05	0.000884554
chr9:137269496:137273715	chr9	137269496	137273715	4220	0.612312	6.70947	7.57442e-05	0.000884554
chr10:11921964:11925557	chr10	11921964	11925557	3594	0.609797	7.21602	7.85535e-05	0.000913042
chr7:2288550:2289171	chr7	2288550	2289171	622	2.02526	2.73507	8.07077e-05	0.000934368
chr8:29710125:29711260	chr8	29710125	29711260	1136	1.18228	4.30663	8.07201e-05	0.000934368
chr6:32222816:32223936	chr6	32222816	32223936	1121	0.996372	4.65212	8.11271e-05	0.00093811
chr6:45406742:45407077	chr6	45406742	45407077	336	2.13365	2.69538	8.11749e-05	0.00093818
chrX:21184443:21185259	chrX	21184443	21185259	817	1.69621	3.42935	8.14398e-05	0.000940271
chr5:141721420:141722659	chr5	141721420	141722659	1240	1.45189	3.69956	8.19988e-05	0.000945751
chr21:36508531:36512509	chr21	36508531	36512509	3979	0.814807	6.41799	8.34404e-05	0.000960894
chr18:28820798:28825338	chr18	28820798	28825338	4541	0.600004	6.53424	8.34872e-05	0.000960939
chr9:22102248:22104561	chr9	22102248	22104561	2314	0.619791	6.60953	8.36467e-05	0.000962281
chr7:17821276:17822000	chr7	17821276	17822000	725	1.7811	3.06321	8.37607e-05	0.000963097
chr16:15992440:15995608	chr16	15992440	15995608	3169	0.609725	6.59734	8.45719e-05	0.000971927
chr3:44902684:44904714	chr3	44902684	44904714	2031	0.865022	5.19013	8.47101e-05	0.000973016
chr2:85672176:85674036	chr2	85672176	85674036	1861	1.01433	4.83704	8.48724e-05	0.000974381
chr14:75759859:75763247	chr14	75759859	75763247	3389	0.601156	6.90308	8.5345e-05	0.000978804
chr15:38518985:38519772	chr15	38518985	38519772	788	1.40118	3.65752	8.73381e-05	0.000996279
chr5:134544155:134544954	chr5	134544155	134544954	800	1.62545	3.44274	8.73104e-05	0.000996279
chr4:123718976:123720109	chr4	123718976	123720109	1134	1.30075	3.88428	8.76967e-05	0.000999635
chr1:41960619:41962710	chr1	41960619	41962710	2092	0.865495	5.2129	8.83681e-05	0.00100575
chr5:95361438:95362910	chr5	95361438	95362910	1473	1.68724	3.48999	8.8344e-05	0.00100575
chr4:77751474:77753025	chr4	77751474	77753025	1552	1.02119	4.54604	9.30433e-05	0.00105415
chr1:24191484:24192639	chr1	24191484	24192639	1156	1.13798	4.37744	9.34652e-05	0.00105839
chr1:9241214:9243204	chr1	9241214	9243204	1991	0.972835	4.82522	9.41491e-05	0.00106506
chr3:30269187:30270333	chr3	30269187	30270333	1147	1.16781	4.31241	9.4812e-05	0.00107148
chr13:45752879:45754243	chr13	45752879	45754243	1365	1.28071	3.8443	9.49553e-05	0.00107255
chr16:70740265:70741786	chr16	70740265	70741786	1522	1.02798	4.61462	9.51201e-05	0.00107387
chrX:21816223:21817809	chrX	21816223	21817809	1587	0.962923	4.73943	9.55899e-05	0.00107863
chr3:112816694:112817499	chr3	112816694	112817499	806	1.24067	3.908	9.77628e-05	0.00110038
chr14:95973397:95974495	chr14	95973397	95974495	1099	1.31388	3.97166	9.81384e-05	0.00110406
chr18:11500275:11501327	chr18	11500275	11501327	1053	1.27451	4.09313	0.000101121	0.00113533
chr15:51738234:51739386	chr15	51738234	51739386	1153	1.23897	4.06284	0.000101808	0.00114133
chr7:104944391:104945528	chr7	104944391	104945528	1138	1.07456	4.32895	0.000101791	0.00114133
chr7:65996819:65998343	chr7	65996819	65998343	1525	1.15255	4.14423	0.000102082	0.00114326
chr2:208675050:208676148	chr2	208675050	208676148	1099	1.36112	3.99883	0.000102457	0.00114688
chr3:197685967:197687771	chr3	197685967	197687771	1805	0.804271	5.31914	0.000102709	0.00114913
chr2:221057344:221058208	chr2	221057344	221058208	865	1.51099	3.74404	0.000103594	0.0011573
chr17:830642:831910	chr17	830642	831910	1269	0.652354	6.13189	0.000103678	0.00115766
chr12:19201586:19202151	chr12	19201586	19202151	566	1.61583	3.24573	0.000105915	0.00118088
chr7:19118510:19119356	chr7	19118510	19119356	847	1.46311	3.58212	0.000106644	0.00118841
chr19:18496060:18497177	chr19	18496060	18497177	1118	1.0768	4.58195	0.000106934	0.00119105
chr1:172607777:172608959	chr1	172607777	172608959	1183	1.51839	3.56872	0.000107027	0.00119149
chr1:42148959:42150239	chr1	42148959	42150239	1281	1.2275	3.97846	0.000107391	0.00119436
chr13:45865237:45867355	chr13	45865237	45867355	2119	0.700904	5.6951	0.00010987	0.00122012
chr9:94908919:94910373	chr9	94908919	94910373	1455	1.04334	4.77312	0.000110062	0.00122139
chr5:43772010:43774593	chr5	43772010	43774593	2584	1.02459	5.18867	0.000111738	0.00123657
chr19:30301541:30302567	chr19	30301541	30302567	1027	1.0741	4.44117	0.000112006	0.00123892
chr12:70082378:70083540	chr12	70082378	70083540	1163	1.0881	4.44411	0.000113257	0.0012503
chr3:49640277:49641136	chr3	49640277	49641136	860	1.33482	4.09461	0.000113149	0.0012503
chr18:21544273:21544894	chr18	21544273	21544894	622	2.05347	2.75815	0.000113734	0.00125432
chr15:99269650:99272466	chr15	99269650	99272466	2817	0.618914	6.22855	0.000116408	0.00127892
chr6:52912721:52914102	chr6	52912721	52914102	1382	1.04932	4.45403	0.000116478	0.00127892
chr14:75032834:75034407	chr14	75032834	75034407	1574	1.12871	4.84404	0.000116539	0.00127896
chr9:132221361:132224282	chr9	132221361	132224282	2922	0.628199	6.08747	0.000117114	0.00128402
chr2:27939089:27940195	chr2	27939089	27940195	1107	1.19037	4.1324	0.000119613	0.00130949
chr12:15949427:15950345	chr12	15949427	15950345	919	1.34999	3.87402	0.000120722	0.0013197
chr5:81647555:81648448	chr5	81647555	81648448	894	1.96438	3.2409	0.000121141	0.00132319
chr9:70343630:70344378	chr9	70343630	70344378	749	1.91263	2.91308	0.000121159	0.00132319
chr17:66314297:66315141	chr17	66314297	66315141	845	1.09952	4.20453	0.000122274	0.00133018
chr2:29329110:29332027	chr2	29329110	29332027	2918	0.724242	5.57209	0.000122088	0.00133018
chr3:49502370:49503960	chr3	49502370	49503960	1591	0.844768	5.04759	0.000122257	0.00133018
chr9:139462066:139463749	chr9	139462066	139463749	1684	0.803298	5.63699	0.000122234	0.00133018
chr13:22809245:22810389	chr13	22809245	22810389	1145	1.29005	3.89294	0.000122619	0.00133199
chr1:168048598:168050031	chr1	168048598	168050031	1434	1.05746	4.59802	0.000124549	0.00134837
chr18:38447271:38448635	chr18	38447271	38448635	1365	1.33795	4.04262	0.000125769	0.00136093
chr3:134076030:134078866	chr3	134076030	134078866	2837	0.698864	5.91874	0.000126161	0.00136451
chr9:136343404:136345213	chr9	136343404	136345213	1810	0.877836	4.95399	0.000127163	0.00137204
chr6:132384482:132385954	chr6	132384482	132385954	1473	1.20501	4.22698	0.000127437	0.00137433
chr10:54246380:54249057	chr10	54246380	54249057	2678	0.706675	5.74776	0.000128233	0.00138159
chr10:24671918:24673184	chr10	24671918	24673184	1267	1.65184	3.1579	0.00012853	0.00138412
chr5:52094096:52097719	chr5	52094096	52097719	3624	0.622232	6.16819	0.000129503	0.00139393
chr4:40335496:40336651	chr4	40335496	40336651	1156	1.53751	3.53743	0.000130418	0.00140235
chr8:41674694:41675559	chr8	41674694	41675559	866	1.50531	3.43076	0.000131593	0.00141249
chr17:39652357:39653626	chr17	39652357	39653626	1270	1.06377	4.57818	0.000131869	0.00141346
chr7:94330177:94331678	chr7	94330177	94331678	1502	0.876309	4.97121	0.000131885	0.00141346
chr1:19335824:19338976	chr1	19335824	19338976	3153	0.606626	6.31535	0.000133563	0.00143076
chr10:99309425:99310136	chr10	99309425	99310136	712	2.16683	2.6059	0.000134024	0.00143502
chr10:6316677:6317925	chr10	6316677	6317925	1249	0.928398	4.87934	0.000134401	0.00143837
chr2:13024548:13025238	chr2	13024548	13025238	691	1.6777	3.23702	0.000135097	0.00144443
chr13:34593663:34595023	chr13	34593663	34595023	1361	1.2181	4.04765	0.000135429	0.0014466
chr10:4805390:4807210	chr10	4805390	4807210	1821	1.40987	3.7458	0.00013706	0.00146123
chr6:14000820:14002653	chr6	14000820	14002653	1834	0.900091	4.8227	0.000138127	0.00147191
chr1:172794758:172796214	chr1	172794758	172796214	1457	1.10439	4.42429	0.000139675	0.00148629
chr18:74792303:74793682	chr18	74792303	74793682	1380	1.57756	3.76354	0.000139832	0.00148725
chr1:33908345:33910309	chr1	33908345	33910309	1965	0.825942	5.11052	0.000140303	0.00149084
chr5:408017:408378	chr5	408017	408378	362	1.96455	2.85113	0.000140979	0.00149661
chr10:116266810:116268119	chr10	116266810	116268119	1310	1.30825	3.98797	0.000142096	0.00150704
chr5:57118616:57122119	chr5	57118616	57122119	3504	0.635715	6.65167	0.000142762	0.00151339
chr1:33563962:33566272	chr1	33563962	33566272	2311	0.646982	6.21518	0.000143786	0.00152065
chr5:67728295:67730858	chr5	67728295	67730858	2564	0.702265	5.72661	0.000145366	0.0015346
chr7:154996702:154998709	chr7	154996702	154998709	2008	0.743453	5.47115	0.000145514	0.00153529
chr12:62975438:62975989	chr12	62975438	62975989	552	1.8301	2.87213	0.000147719	0.00155636
chr10:4775347:4776486	chr10	4775347	4776486	1140	1.19974	4.128	0.000148714	0.00156611
chr1:19267562:19268951	chr1	19267562	19268951	1390	0.941207	4.6264	0.000149197	0.0015691
chr15:93457246:93459181	chr15	93457246	93459181	1936	0.848567	5.15627	0.000149795	0.00157454
chr13:45629414:45631092	chr13	45629414	45631092	1679	0.759387	5.32843	0.000150243	0.0015785
chr11:355052:356431	chr11	355052	356431	1380	0.817084	5.15614	0.000151151	0.00158656
chr11:67888686:67891105	chr11	67888686	67891105	2420	0.695681	5.72399	0.000153137	0.00160215
chr1:115710433:115711675	chr1	115710433	115711675	1243	1.5886	3.55997	0.000154018	0.00160986
chr10:59782878:59784328	chr10	59782878	59784328	1451	1.12349	4.09758	0.000154226	0.00161128
chr7:50732009:50733235	chr7	50732009	50733235	1227	1.38173	3.83463	0.000154822	0.00161601
chr6:36915546:36916473	chr6	36915546	36916473	928	1.67368	3.04483	0.000155358	0.00161934
chrX:46126892:46128404	chrX	46126892	46128404	1513	0.88658	4.913	0.0001556	0.00162035
chr20:8996226:8996646	chr20	8996226	8996646	421	1.75812	3.33888	0.000157432	0.00163791
chr5:52082599:52084679	chr5	52082599	52084679	2081	0.883421	5.11233	0.00015838	0.00164548
chr6:1055229:1056413	chr6	1055229	1056413	1185	1.48809	3.55075	0.000158789	0.00164896
chr12:113444677:113445497	chr12	113444677	113445497	821	1.59041	3.24645	0.000159363	0.00165263
chrX:45708583:45711730	chrX	45708583	45711730	3148	0.676886	5.99158	0.000159713	0.00165549
chr17:17579104:17579806	chr17	17579104	17579806	703	1.17663	4.01888	0.000159978	0.00165671
chr6:149352653:149354916	chr6	149352653	149354916	2264	0.740775	5.47024	0.000160614	0.00166217
chr19:796024:799747	chr19	796024	799747	3724	0.641566	6.21837	0.000161321	0.00166753
chr7:150004792:150005232	chr7	150004792	150005232	441	1.85037	2.79721	0.000163324	0.00168513
chr2:72365402:72366123	chr2	72365402	72366123	722	1.98798	2.69432	0.000164958	0.0017012
chr2:164203867:164206137	chr2	164203867	164206137	2271	0.723974	5.49676	0.000166497	0.00171549
chr14:94425612:94427262	chr14	94425612	94427262	1651	0.74528	5.47022	0.000167968	0.00172906
chr16:16013807:16014379	chr16	16013807	16014379	573	1.30007	3.73084	0.000168187	0.00173052
chr1:218669858:218670542	chr1	218669858	218670542	685	1.2799	3.7171	0.000169984	0.00174821
chr1:56046135:56047336	chr1	56046135	56047336	1202	1.69503	3.14381	0.000170066	0.00174825
chr17:19090638:19092998	chr17	19090638	19092998	2361	0.735847	5.51365	0.000171355	0.00176069
chr2:12854704:12856612	chr2	12854704	12856612	1909	0.830317	5.11723	0.000173421	0.00177947
chr1:20125479:20127015	chr1	20125479	20127015	1537	0.839762	5.18416	0.000175217	0.00179543
chr11:86303017:86304231	chr11	86303017	86304231	1215	1.13168	4.46508	0.000175928	0.00180025
chr2:101499349:101500378	chr2	101499349	101500378	1030	1.41197	3.50562	0.000176979	0.00180936
chr8:128870926:128873545	chr8	128870926	128873545	2620	0.652609	5.90711	0.000180482	0.00184265
chr5:124819451:124821694	chr5	124819451	124821694	2244	0.679648	5.67407	0.000182877	0.00186455
chr17:55993976:55996347	chr17	55993976	55996347	2372	0.740165	5.3602	0.000184608	0.00187878
chr20:52517131:52517935	chr20	52517131	52517935	805	1.427	3.46946	0.000185156	0.00188264
chr10:17269167:17271044	chr10	17269167	17271044	1878	1.05154	4.31317	0.000186813	0.00189605
chr12:89032785:89033392	chr12	89032785	89033392	608	1.71013	3.08086	0.000187001	0.0018971
chr19:56058091:56059439	chr19	56058091	56059439	1349	1.01955	4.39197	0.000187261	0.00189888
chr2:235860421:235862547	chr2	235860421	235862547	2127	1.09756	4.66423	0.000188373	0.00190842
chr1:200988540:200989853	chr1	200988540	200989853	1314	1.28053	3.81778	0.000194653	0.0019676
chr11:120387744:120388957	chr11	120387744	120388957	1214	1.33317	3.69457	0.000196589	0.00198359
chr20:48908556:48909909	chr20	48908556	48909909	1354	1.1321	4.47142	0.000196511	0.00198359
chr6:106123529:106124372	chr6	106123529	106124372	844	1.75791	2.89101	0.000196884	0.00198568
chr15:63809733:63810039	chr15	63809733	63810039	307	1.75295	2.97678	0.000198085	0.00199586
chr17:80364969:80365509	chr17	80364969	80365509	541	1.80885	2.92739	0.000200608	0.00201778
chr4:90601617:90603096	chr4	90601617	90603096	1480	1.03567	4.28932	0.000200764	0.00201845
chr10:65459433:65461030	chr10	65459433	65461030	1598	0.739273	5.52609	0.000202446	0.00203262
chr8:40929059:40931125	chr8	40929059	40931125	2067	0.601433	6.23528	0.000203819	0.00204549
chr8:8145737:8148127	chr8	8145737	8148127	2391	0.621768	6.48521	0.000204143	0.00204762
chr9:42844941:42846779	chr9	42844941	42846779	1839	0.883507	4.99246	0.000206351	0.00206812
chr17:39769020:39769581	chr17	39769020	39769581	562	1.72466	2.94442	0.000206869	0.00207214
chr18:47073797:47075158	chr18	47073797	47075158	1362	0.992236	4.42794	0.000207947	0.0020804
chr22:47728975:47730198	chr22	47728975	47730198	1224	0.889099	4.89554	0.000210051	0.00209957
chr10:21623824:21626746	chr10	21623824	21626746	2923	0.609661	6.16191	0.00021637	0.002156
chr6:9766356:9767137	chr6	9766356	9767137	782	1.38282	3.56457	0.000219378	0.00218306
chr3:195836984:195838304	chr3	195836984	195838304	1321	0.71621	5.53911	0.00021977	0.002186
chr5:318461:319142	chr5	318461	319142	682	1.07884	4.27416	0.000220859	0.00219585
chr18:56278497:56279992	chr18	56278497	56279992	1496	0.960806	4.48864	0.000221317	0.00219943
chr1:145382143:145383516	chr1	145382143	145383516	1374	0.70991	5.60857	0.000226368	0.00224365
chr4:34677941:34678512	chr4	34677941	34678512	572	1.64867	3.02726	0.000227533	0.00225122
chr9:97765492:97769312	chr9	97765492	97769312	3821	0.656023	5.67282	0.000227524	0.00225122
chr9:127495434:127498461	chr9	127495434	127498461	3028	0.636971	5.86582	0.000230064	0.00227189
chr14:75037853:75040456	chr14	75037853	75040456	2604	0.746404	5.71885	0.000231029	0.00227877
chr3:19188217:19189057	chr3	19188217	19189057	841	1.36631	3.51845	0.000237597	0.00233841
chr17:68401729:68402258	chr17	68401729	68402258	530	1.86882	3.12191	0.000238911	0.00234928
chr7:41286317:41288264	chr7	41286317	41288264	1948	0.700577	5.45808	0.000239906	0.00235803
chr17:66259134:66259918	chr17	66259134	66259918	785	1.07482	4.16204	0.000240785	0.00236355
chrX:45601171:45604332	chrX	45601171	45604332	3162	0.711728	5.7445	0.000242401	0.00237837
chr11:69862291:69864202	chr11	69862291	69864202	1912	0.962806	4.79797	0.000242537	0.00237867
chr9:91794512:91795865	chr9	91794512	91795865	1354	0.740515	5.4326	0.000244476	0.00239454
chr7:51417701:51418363	chr7	51417701	51418363	663	1.50449	3.28187	0.000249068	0.00243313
chr16:28436508:28437838	chr16	28436508	28437838	1331	1.49266	3.68866	0.000249987	0.00243892
chr2:242523810:242524454	chr2	242523810	242524454	645	1.41168	3.36787	0.000251367	0.00245025
chr1:228132942:228134765	chr1	228132942	228134765	1824	0.959048	4.61962	0.000252558	0.00246079
chr17:39834789:39835787	chr17	39834789	39835787	999	1.31876	3.99582	0.000252955	0.00246359
chr7:47802547:47803482	chr7	47802547	47803482	936	1.48207	3.40779	0.00025349	0.00246773
chr3:11806384:11806867	chr3	11806384	11806867	484	1.70421	2.94291	0.000255394	0.00248303
chr2:227199297:227200837	chr2	227199297	227200837	1541	1.04683	4.61539	0.000256843	0.00249495
chr1:153498033:153499336	chr1	153498033	153499336	1304	1.54566	3.30475	0.000258475	0.00250972
chr19:2531278:2533462	chr19	2531278	2533462	2185	0.705518	5.75792	0.000258973	0.00251279
chr4:41526767:41527726	chr4	41526767	41527726	960	1.25426	3.70529	0.000261156	0.00252707
chr9:85641991:85642941	chr9	85641991	85642941	951	1.46181	3.45268	0.000267096	0.00258223
chr19:17585853:17587456	chr19	17585853	17587456	1604	0.680994	5.59682	0.000267589	0.00258589
chr7:114736982:114738026	chr7	114736982	114738026	1045	1.05666	4.10479	0.000268312	0.00259176
chr2:214884033:214884533	chr2	214884033	214884533	501	1.92114	2.73754	0.000271267	0.00261917
chr14:96857837:96859074	chr14	96857837	96859074	1238	1.10509	4.1031	0.000272439	0.00262935
chr17:782684:784263	chr17	782684	784263	1580	0.900208	4.76241	0.00027324	0.00263595
chr19:40916818:40917955	chr19	40916818	40917955	1138	1.21991	3.96903	0.000275521	0.00265567
chr22:47724117:47726048	chr22	47724117	47726048	1932	0.630493	5.83691	0.000276021	0.00265934
chr15:64813114:64814822	chr15	64813114	64814822	1709	0.842329	4.80005	0.000277852	0.00267193
chr11:17003097:17004008	chr11	17003097	17004008	912	1.41323	3.50387	0.000279075	0.0026807
chr8:89969258:89970733	chr8	89969258	89970733	1476	0.912482	4.57057	0.000284698	0.00273237
chr17:70698061:70699547	chr17	70698061	70699547	1487	0.796573	4.98861	0.000293322	0.00280194
chr13:106752424:106753377	chr13	106752424	106753377	954	1.02274	4.25667	0.00029494	0.00281259
chr10:122872205:122873257	chr10	122872205	122873257	1053	1.20053	4.02269	0.000296296	0.0028219
chr3:36720311:36721516	chr3	36720311	36721516	1206	1.8125	3.82677	0.000299928	0.00284926
chr7:83702499:83703429	chr7	83702499	83703429	931	1.77197	2.817	0.000302219	0.00286737
chr6:137554629:137556311	chr6	137554629	137556311	1683	0.972726	4.54505	0.000302954	0.00287313
chr15:74248373:74250007	chr15	74248373	74250007	1635	1.2205	3.88661	0.000307478	0.00290988
chr22:30634255:30635881	chr22	30634255	30635881	1627	0.79301	5.12365	0.000308813	0.00292004
chr3:193987276:193989890	chr3	193987276	193989890	2615	0.725804	5.36084	0.000311109	0.00294051
chr6:125302581:125303347	chr6	125302581	125303347	767	1.33727	3.53964	0.000311572	0.00294365
chr15:74692317:74694337	chr15	74692317	74694337	2021	0.76852	5.1017	0.000317404	0.00298866
chr12:124869693:124871614	chr12	124869693	124871614	1922	0.848391	4.82279	0.000324643	0.00304403
chr15:33360525:33361174	chr15	33360525	33361174	650	2.20282	2.51539	0.000326425	0.00305516
chr21:35925094:35926251	chr21	35925094	35926251	1158	1.64576	3.03123	0.000326556	0.00305516
chr8:29593842:29596278	chr8	29593842	29596278	2437	0.611424	6.20043	0.000327076	0.00305789
chr2:137002835:137004188	chr2	137002835	137004188	1354	0.993354	4.48138	0.000338863	0.0031615
chr1:151880630:151882654	chr1	151880630	151882654	2025	0.747634	5.62192	0.000340401	0.00317305
chr5:56731156:56732609	chr5	56731156	56732609	1454	0.850606	5.11626	0.000340526	0.00317305
chr12:101693329:101694354	chr12	101693329	101694354	1026	1.44268	3.24541	0.000343233	0.00319429
chr8:126525362:126526677	chr8	126525362	126526677	1316	1.06361	4.19015	0.000345192	0.00320852
chr5:71227633:71229406	chr5	71227633	71229406	1774	0.802145	4.96326	0.000348756	0.00323762
chr16:57018476:57020186	chr16	57018476	57020186	1711	0.821475	4.81643	0.000351819	0.00326471
chr14:73427572:73430659	chr14	73427572	73430659	3088	0.678629	6.37497	0.000353092	0.0032738
chr3:170468843:170470363	chr3	170468843	170470363	1521	0.931295	5.05872	0.000359403	0.00332423
chr9:3968944:3969757	chr9	3968944	3969757	814	1.47914	3.21807	0.000359425	0.00332423
chr9:116457802:116459114	chr9	116457802	116459114	1313	1.50193	3.44228	0.000359569	0.00332423
chr8:32962361:32962966	chr8	32962361	32962966	606	1.70212	2.85152	0.000360384	0.00332996
chr4:160516061:160516901	chr4	160516061	160516901	841	1.66277	3.03393	0.000361512	0.00333669
chr3:186708680:186709356	chr3	186708680	186709356	677	1.67482	3.19218	0.00036174	0.00333742
chr11:9823858:9824565	chr11	9823858	9824565	708	1.49922	3.43038	0.000366293	0.00337249
chr15:101707757:101708859	chr15	101707757	101708859	1103	1.39916	3.37202	0.000373251	0.0034281
chr11:28723333:28725003	chr11	28723333	28725003	1671	0.885232	4.58709	0.000374891	0.00344175
chr6:130184425:130185852	chr6	130184425	130185852	1428	1.06727	4.76348	0.000375492	0.00344444
chr9:81637370:81638793	chr9	81637370	81638793	1424	0.876498	4.86781	0.000375779	0.00344567
chr13:34738470:34739277	chr13	34738470	34739277	808	1.59309	3.12581	0.000378915	0.00346875
chr19:48856624:48859357	chr19	48856624	48859357	2734	0.642106	5.7864	0.000382893	0.00350081
chr2:43369929:43370529	chr2	43369929	43370529	601	1.86456	2.63081	0.000389631	0.00355667
chr12:125477236:125478171	chr12	125477236	125478171	936	1.00914	4.3378	0.000390089	0.00355674
chr15:60698987:60701411	chr15	60698987	60701411	2425	0.679446	5.46309	0.000393542	0.00358216
chr20:11871718:11873318	chr20	11871718	11873318	1601	0.903384	4.48401	0.000398656	0.00362429
chr14:61613409:61615966	chr14	61613409	61615966	2558	0.797726	5.04878	0.000405167	0.00366712
chr12:32279659:32280126	chr12	32279659	32280126	468	1.58073	2.99405	0.000405834	0.00367019
chr1:44394576:44397125	chr1	44394576	44397125	2550	0.760208	6.07113	0.000406898	0.00367833
chr10:93411411:93413815	chr10	93411411	93413815	2405	0.808948	5.05023	0.000412842	0.00372305
chr20:48391582:48392650	chr20	48391582	48392650	1069	0.976583	4.26166	0.000414991	0.00373792
chr2:132426445:132427410	chr2	132426445	132427410	966	1.32074	3.60386	0.000418759	0.00376731
chr1:59220365:59221667	chr1	59220365	59221667	1303	0.84756	4.67416	0.000419554	0.00377295
chrX:46119619:46121015	chrX	46119619	46121015	1397	0.85445	4.79105	0.000420778	0.00378092
chr17:69067075:69068809	chr17	69067075	69068809	1735	0.727611	5.81999	0.000428733	0.0038447
chr1:11967850:11970409	chr1	11967850	11970409	2560	0.651649	5.79241	0.000430044	0.00385337
chr22:32224827:32227192	chr22	32224827	32227192	2366	0.703573	5.73357	0.000430023	0.00385337
chr20:4065664:4067176	chr20	4065664	4067176	1513	0.926206	4.80877	0.000431373	0.00386374
chr19:50585579:50586316	chr19	50585579	50586316	738	1.59754	2.94316	0.000431615	0.00386436
chr1:20091564:20092426	chr1	20091564	20092426	863	1.30692	3.78866	0.000432303	0.00386897
chr8:23577609:23578644	chr8	23577609	23578644	1036	1.22976	3.75515	0.00043628	0.00390301
chr14:67398242:67400190	chr14	67398242	67400190	1949	0.866835	5.0753	0.000439283	0.00392674
chr5:151078105:151079723	chr5	151078105	151079723	1619	0.852845	4.61401	0.000441049	0.00393938
chr22:47330367:47331232	chr22	47330367	47331232	866	1.16982	3.90651	0.000442631	0.00395036
chr2:241195062:241196448	chr2	241195062	241196448	1387	0.831201	5.01781	0.000444007	0.00396106
chr6:85166895:85167617	chr6	85166895	85167617	723	1.505	3.23757	0.000444837	0.00396532
chr4:157672229:157673557	chr4	157672229	157673557	1329	1.34141	3.54441	0.000447269	0.00398383
chr18:56660405:56660822	chr18	56660405	56660822	418	1.47473	3.2018	0.000449342	0.0040007
chr7:116772218:116773214	chr7	116772218	116773214	997	1.47228	3.26562	0.000457785	0.00406618
chr17:57877770:57878208	chr17	57877770	57878208	439	1.13101	3.86408	0.000459358	0.00407692
chr17:80249527:80251087	chr17	80249527	80251087	1561	0.611711	5.86325	0.000461163	0.0040897
chr10:3494478:3495658	chr10	3494478	3495658	1181	0.911744	4.59679	0.000481797	0.0042458
chrX:68149169:68150525	chrX	68149169	68150525	1357	1.1773	3.68269	0.000485807	0.00427609
chr16:11733770:11735666	chr16	11733770	11735666	1897	0.741261	5.42445	0.000489098	0.00429663
chr17:39620736:39621833	chr17	39620736	39621833	1098	1.13958	4.02349	0.000493456	0.00433321
chr16:30193799:30194218	chr16	30193799	30194218	420	1.69481	2.85344	0.000502909	0.00440414
chr17:80453350:80454122	chr17	80453350	80454122	773	1.20484	3.90325	0.000503195	0.00440492
chr11:59473762:59475256	chr11	59473762	59475256	1495	0.802559	4.82817	0.000504066	0.00441082
chr19:55718007:55719471	chr19	55718007	55719471	1465	0.705163	5.47408	0.000505156	0.00441863
chr3:69231649:69232391	chr3	69231649	69232391	743	1.34877	3.47597	0.00050709	0.00443382
chr12:76333154:76334805	chr12	76333154	76334805	1652	0.87999	4.87723	0.000513255	0.00447899
chr16:69547152:69550068	chr16	69547152	69550068	2917	0.621472	6.04063	0.000517257	0.00450514
chr6:21731554:21732325	chr6	21731554	21732325	772	1.20595	3.73012	0.000521008	0.00453604
chr22:44893182:44894788	chr22	44893182	44894788	1607	0.820365	5.01331	0.000521581	0.00453928
chr9:97544368:97546633	chr9	97544368	97546633	2266	0.778468	4.99267	0.000528555	0.00459284
chr7:93632742:93634682	chr7	93632742	93634682	1941	0.725629	5.2766	0.000530545	0.00460477
chr6:45534469:45534983	chr6	45534469	45534983	515	1.51442	3.01471	0.000539307	0.00467538
chr17:42766466:42768869	chr17	42766466	42768869	2404	0.620776	5.64856	0.00054563	0.0047229
chr9:139444735:139446115	chr9	139444735	139446115	1381	1.10911	4.12348	0.000550537	0.00475435
chr5:57185220:57185888	chr5	57185220	57185888	669	1.3964	3.30253	0.000553818	0.00477532
chr4:111985170:111985778	chr4	111985170	111985778	609	1.56974	2.92591	0.000575183	0.00494432
chr21:33847715:33848826	chr21	33847715	33848826	1112	0.862711	4.57477	0.00057648	0.00495357
chr2:236302187:236303526	chr2	236302187	236303526	1340	0.785084	5.13944	0.000586871	0.00503514
chr16:87296301:87297926	chr16	87296301	87297926	1626	0.609451	6.11204	0.000598398	0.00511445
chr1:68787878:68789775	chr1	68787878	68789775	1898	0.685144	5.36207	0.000609534	0.00519576
chr18:20686150:20688109	chr18	20686150	20688109	1960	0.66152	5.4045	0.000611808	0.00521316
chr5:118638684:118639531	chr5	118638684	118639531	848	1.42251	3.2281	0.000615605	0.00523556
chr9:139470858:139474096	chr9	139470858	139474096	3239	0.616289	5.70392	0.000625033	0.00530412
chr10:74019147:74021925	chr10	74019147	74021925	2779	0.6255	6.57066	0.000629351	0.00533419
chr9:74929908:74931496	chr9	74929908	74931496	1589	0.813674	4.77961	0.000632795	0.00535938
chr19:39224807:39225811	chr19	39224807	39225811	1005	1.0993	3.83453	0.00063365	0.00536071
chr6:56506951:56508950	chr6	56506951	56508950	2000	0.960746	4.30543	0.000633204	0.00536071
chr4:166142708:166144427	chr4	166142708	166144427	1720	0.697513	5.25416	0.000636297	0.00537888
chr1:17076301:17077490	chr1	17076301	17077490	1190	0.73266	5.0346	0.000641109	0.00541645
chr10:4745788:4747330	chr10	4745788	4747330	1543	0.866696	4.65882	0.000643677	0.00543384
chr7:105409833:105411477	chr7	105409833	105411477	1645	0.809507	4.74666	0.000646904	0.0054562
chr21:19061405:19062014	chr21	19061405	19062014	610	1.39588	3.15404	0.000657734	0.00553296
chr19:11373278:11373806	chr19	11373278	11373806	529	1.57777	2.85029	0.000658238	0.00553427
chr7:105446218:105447649	chr7	105446218	105447649	1432	1.07586	4.10555	0.000667255	0.00560254
chr11:12210988:12211764	chr11	12210988	12211764	777	1.38595	3.49205	0.000669247	0.00561573
chr19:51435001:51437458	chr19	51435001	51437458	2458	0.668447	5.49068	0.000676572	0.00567227
chr3:49302149:49304094	chr3	49302149	49304094	1946	0.709079	5.35864	0.000677854	0.00567804
chr7:110174226:110175111	chr7	110174226	110175111	886	1.42155	3.39012	0.00067786	0.00567804
chr11:94852614:94854104	chr11	94852614	94854104	1491	0.90833	4.44504	0.000694567	0.00579194
chr1:164527655:164528490	chr1	164527655	164528490	836	1.24016	3.70376	0.000695126	0.00579315
chr6:133951932:133954334	chr6	133951932	133954334	2403	1.33269	3.42567	0.000700692	0.00583736
chr15:45471580:45472824	chr15	45471580	45472824	1245	1.48533	3.04799	0.000701314	0.00584038
chr16:24855138:24856354	chr16	24855138	24856354	1217	0.976034	4.20179	0.000704793	0.00586717
chr2:167990827:167991835	chr2	167990827	167991835	1009	1.49654	3.06581	0.000705748	0.00587154
chr21:44914057:44914891	chr21	44914057	44914891	835	1.2902	3.40649	0.000715667	0.00594444
chr2:28021440:28023783	chr2	28021440	28023783	2344	0.730976	5.28259	0.000720265	0.00598041
chr6:126501448:126502990	chr6	126501448	126502990	1543	0.812321	4.75605	0.000725361	0.00601604
chr1:15562652:15563348	chr1	15562652	15563348	697	1.19419	3.55023	0.000728894	0.00604087
chrX:46122820:46123698	chrX	46122820	46123698	879	0.940307	4.25097	0.000737105	0.0060999
chr4:76105782:76106844	chr4	76105782	76106844	1063	1.27559	3.43801	0.000741598	0.00613255
chr7:151100520:151101684	chr7	151100520	151101684	1165	0.940381	4.35452	0.000744873	0.00615509
chr5:139256474:139257591	chr5	139256474	139257591	1118	1.02654	4.17229	0.000749445	0.00618603
chr8:86349455:86349910	chr8	86349455	86349910	456	1.281	3.42036	0.000752939	0.00620573
chr4:37281863:37282536	chr4	37281863	37282536	674	1.56883	2.91101	0.000753934	0.00621164
chr7:48127645:48129001	chr7	48127645	48129001	1357	0.609111	5.58131	0.000764651	0.00629068
chr7:115924345:115925026	chr7	115924345	115925026	682	0.983375	4.08435	0.000769349	0.00632469
chr5:45793718:45794697	chr5	45793718	45794697	980	1.31656	3.41217	0.000770398	0.006331
chr11:43851906:43853377	chr11	43851906	43853377	1472	0.72837	5.05309	0.000771466	0.00633745
chr1:7461468:7462952	chr1	7461468	7462952	1485	0.644159	5.57005	0.000778996	0.00639228
chr5:114795387:114798611	chr5	114795387	114798611	3225	0.775578	5.39975	0.000782409	0.00641323
chr6:102114252:102114702	chr6	102114252	102114702	451	2.01763	2.63295	0.000784207	0.00642328
chr7:13781345:13782366	chr7	13781345	13782366	1022	1.46445	3.15828	0.000784497	0.00642331
chr3:14366102:14366707	chr3	14366102	14366707	606	1.75206	2.97194	0.000790104	0.00645977
chr16:53898320:53900079	chr16	53898320	53900079	1760	0.68984	5.308	0.000793592	0.00648355
chr10:74007912:74008941	chr10	74007912	74008941	1030	0.972767	4.26463	0.000797858	0.00651603
chr2:142869607:142871705	chr2	142869607	142871705	2099	0.687248	5.30659	0.000815439	0.00664026
chrX:45188262:45189421	chrX	45188262	45189421	1160	0.95453	4.24685	0.000821791	0.00668712
chr8:29827005:29828328	chr8	29827005	29828328	1324	0.775749	4.93311	0.000823552	0.00669902
chr2:192500211:192501669	chr2	192500211	192501669	1459	0.801531	4.9363	0.000842512	0.00682352
chr12:29793469:29794462	chr12	29793469	29794462	994	0.968338	4.47549	0.000846672	0.00685226
chr2:171078075:171079150	chr2	171078075	171079150	1076	1.16288	3.8608	0.000849991	0.00687664
chr2:43385301:43386408	chr2	43385301	43386408	1108	1.22394	3.63826	0.000851394	0.00688376
chr13:110663977:110665104	chr13	110663977	110665104	1128	0.934933	4.25089	0.000853963	0.00689881
chr5:151124019:151127140	chr5	151124019	151127140	3122	0.619071	5.99422	0.000857171	0.00692224
chr1:147805408:147807475	chr1	147805408	147807475	2068	0.606882	5.591	0.000859037	0.00693231
chr7:151122411:151124513	chr7	151122411	151124513	2103	0.65017	5.37032	0.000861938	0.00695321
chr6:11770528:11772008	chr6	11770528	11772008	1481	0.771732	4.74091	0.000864297	0.00696711
chr3:170874112:170875034	chr3	170874112	170875034	923	1.11295	3.77474	0.000865705	0.00697106
chr6:33748597:33750950	chr6	33748597	33750950	2354	0.611856	5.81407	0.000868207	0.00698869
chr5:146416997:146417981	chr5	146416997	146417981	985	1.16248	3.83515	0.000871742	0.00701463
chr7:95848872:95849419	chr7	95848872	95849419	548	1.85205	2.51513	0.000879751	0.00707146
chr6:119941938:119942837	chr6	119941938	119942837	900	1.38714	3.92476	0.000892333	0.00715463
chr14:103594754:103595496	chr14	103594754	103595496	743	1.49921	3.04093	0.000894489	0.00716166
chr5:148291667:148294415	chr5	148291667	148294415	2749	0.741538	5.31256	0.000914086	0.00729251
chr2:163200451:163201532	chr2	163200451	163201532	1082	1.09487	3.87024	0.0009149	0.00729641
chr8:87188224:87189512	chr8	87188224	87189512	1289	0.913578	4.23842	0.00091527	0.00729676
chr10:122851880:122852379	chr10	122851880	122852379	500	1.34606	3.24428	0.000916871	0.00730693
chr6:17907499:17908583	chr6	17907499	17908583	1085	1.27416	3.47386	0.00092001	0.00732673
chr10:45476227:45477888	chr10	45476227	45477888	1662	0.607097	5.80664	0.000923854	0.00735212
chr9:136747075:136747497	chr9	136747075	136747497	423	1.68666	2.60905	0.000930277	0.00739798
chr21:36420184:36420643	chr21	36420184	36420643	460	1.6935	2.69221	0.000932343	0.00741178
chr15:39504619:39506714	chr15	39504619	39506714	2096	0.630191	5.60687	0.000933106	0.00741259
chr19:59107590:59108758	chr19	59107590	59108758	1169	1.29294	3.46425	0.000934563	0.00741627
chr7:116007106:116007782	chr7	116007106	116007782	677	1.42493	3.30741	0.000942453	0.00747094
chr9:20835474:20836293	chr9	20835474	20836293	820	1.38282	3.24031	0.000944345	0.00747801
chr6:31304780:31305414	chr6	31304780	31305414	635	1.57363	3.05387	0.000944876	0.00747957
chr3:102017620:102018816	chr3	102017620	102018816	1197	1.2287	4.20812	0.00094877	0.00750775
chr12:92474037:92474932	chr12	92474037	92474932	896	1.22494	3.67067	0.000961406	0.00759433
chr6:140364270:140366278	chr6	140364270	140366278	2009	0.766876	5.01271	0.000960918	0.00759433
chr20:43663927:43666087	chr20	43663927	43666087	2161	0.856554	5.45206	0.000962606	0.00759957
chr9:108675060:108675815	chr9	108675060	108675815	756	1.20969	3.58649	0.000972181	0.00766593
chr2:72760455:72762206	chr2	72760455	72762206	1752	0.866322	4.60203	0.000978721	0.00770936
chr16:3989248:3989877	chr16	3989248	3989877	630	1.37653	3.13697	0.000980583	0.00771509
chr2:25219622:25220565	chr2	25219622	25220565	944	1.20175	3.52016	0.000987629	0.00776316
chr1:147752436:147754008	chr1	147752436	147754008	1573	0.736326	4.98913	0.000994036	0.00780804
chr12:54261373:54262325	chr12	54261373	54262325	953	1.08908	3.94322	0.000999052	0.00783275
chr14:73777730:73778598	chr14	73777730	73778598	869	1.30494	3.24205	0.000999279	0.00783275
chr16:28813896:28815411	chr16	28813896	28815411	1516	0.871462	4.31632	0.00100071	0.00783845
chr17:41496308:41496917	chr17	41496308	41496917	610	1.674	2.7771	0.00100677	0.00788316
chr6:12348575:12349952	chr6	12348575	12349952	1378	0.858829	4.59568	0.00100754	0.00788649
chr6:87291480:87292189	chr6	87291480	87292189	710	1.43743	3.03189	0.00101306	0.00791865
chr3:149050508:149051852	chr3	149050508	149051852	1345	1.09314	3.74901	0.00102078	0.00797064
chr3:13040535:13041415	chr3	13040535	13041415	881	1.05935	4.05542	0.0010331	0.00805557
chr8:18523744:18524661	chr8	18523744	18524661	918	1.17828	3.53417	0.0010368	0.00808162
chr11:106353776:106354414	chr11	106353776	106354414	639	1.32861	3.21219	0.00104289	0.00812066
chr3:50675885:50677090	chr3	50675885	50677090	1206	1.22405	3.61502	0.00104285	0.00812066
chr6:10521219:10521918	chr6	10521219	10521918	700	1.39603	3.26783	0.00105146	0.0081675
chr4:69234777:69235481	chr4	69234777	69235481	705	1.36105	3.18853	0.00105363	0.00817586
chr4:15696528:15697534	chr4	15696528	15697534	1007	1.49122	4.21008	0.00105506	0.00818412
chr17:2795441:2797611	chr17	2795441	2797611	2171	0.724449	4.95393	0.00105607	0.00818912
chr11:69087944:69089693	chr11	69087944	69089693	1750	1.00923	4.46105	0.00105998	0.00821378
chr9:131940108:131942717	chr9	131940108	131942717	2610	0.729602	4.98327	0.00106283	0.00823297
chr10:3930003:3930721	chr10	3930003	3930721	719	1.05377	3.75766	0.0010708	0.00828517
chr12:66419000:66419690	chr12	66419000	66419690	691	1.0522	3.79732	0.00107126	0.00828517
chr1:181042379:181043274	chr1	181042379	181043274	896	1.22614	3.99028	0.0010767	0.00831856
chrX:17422908:17424012	chrX	17422908	17424012	1105	1.02655	4.03855	0.00107928	0.00833448
chr1:244326501:244328205	chr1	244326501	244328205	1705	0.601518	5.63209	0.00109043	0.00841479
chr1:78004746:78006724	chr1	78004746	78006724	1979	0.746504	4.99884	0.00109408	0.00843424
chr5:88608867:88610508	chr5	88608867	88610508	1642	0.820754	4.82992	0.00109371	0.00843424
chr2:54714852:54715656	chr2	54714852	54715656	805	1.38921	3.33434	0.00110038	0.00847992
chr17:17683648:17685174	chr17	17683648	17685174	1527	0.946252	4.24166	0.0011016	0.00848641
chr10:102772214:102773304	chr10	102772214	102773304	1091	0.77142	5.0599	0.0011075	0.00852014
chr1:211055791:211056592	chr1	211055791	211056592	802	1.35864	3.37716	0.0011106	0.00853224
chr4:4754818:4755528	chr4	4754818	4755528	711	1.6519	2.90452	0.00111888	0.00858407
chr7:26588909:26590250	chr7	26588909	26590250	1342	0.951196	4.07149	0.00112759	0.00863905
chr20:4492972:4495192	chr20	4492972	4495192	2221	0.643774	5.39234	0.00112894	0.00864647
chr9:72590495:72591738	chr9	72590495	72591738	1244	1.01091	4.05369	0.00113704	0.00869957
chr17:47178396:47179581	chr17	47178396	47179581	1186	0.916848	4.38256	0.00113809	0.00870466
chr21:43653984:43655429	chr21	43653984	43655429	1446	0.957519	4.02159	0.00114893	0.00877348
chr6:55955782:55956629	chr6	55955782	55956629	848	1.20819	3.49904	0.00115701	0.00882228
chr7:106208924:106210073	chr7	106208924	106210073	1150	1.06447	4.09911	0.00117044	0.00890648
chr16:11720596:11722568	chr16	11720596	11722568	1973	0.761211	5.1102	0.00117956	0.00896674
chr18:2587885:2590440	chr18	2587885	2590440	2556	0.705146	5.85634	0.00118721	0.00901486
chr6:128976772:128977818	chr6	128976772	128977818	1047	0.906513	4.37236	0.0011879	0.00901486
chr1:218553647:218554300	chr1	218553647	218554300	654	1.20889	3.4377	0.00119173	0.00904083
chr2:113551608:113552340	chr2	113551608	113552340	733	1.25873	3.60575	0.00119272	0.00904527
chr21:36604353:36605916	chr21	36604353	36605916	1564	0.856928	4.58544	0.00119425	0.00905386
chr19:55628987:55630137	chr19	55628987	55630137	1151	0.794774	4.74103	0.00119698	0.00906532
chr5:127227995:127229179	chr5	127227995	127229179	1185	1.01206	3.85489	0.00121148	0.009151
chr3:197216715:197217913	chr3	197216715	197217913	1199	0.866633	4.30446	0.00122535	0.00924273
chr1:144010590:144011369	chr1	144010590	144011369	780	1.06477	3.78215	0.0012272	0.00925043
chr7:30245627:30246762	chr7	30245627	30246762	1136	1.23982	3.34212	0.00122691	0.00925043
chrX:69473193:69475105	chrX	69473193	69475105	1913	1.24151	5.17255	0.00124886	0.00938532
chr4:25909686:25910975	chr4	25909686	25910975	1290	0.90051	4.24	0.00125067	0.0093894
chr14:94611248:94611821	chr14	94611248	94611821	574	1.511	2.81582	0.0012618	0.00946349
chr6:30843323:30844892	chr6	30843323	30844892	1570	0.801645	4.68118	0.00129009	0.00965304
chr4:157593727:157594816	chr4	157593727	157594816	1090	1.35663	3.09259	0.00129554	0.00968738
chr13:45905578:45907875	chr13	45905578	45907875	2298	0.605906	5.55298	0.00130015	0.00970896
chr2:71725470:71726181	chr2	71725470	71726181	712	1.11617	4.04869	0.00130113	0.00971299
chr8:25040687:25042030	chr8	25040687	25042030	1344	0.820413	4.71648	0.0013034	0.00972666
chr20:13010553:13011320	chr20	13010553	13011320	768	1.57673	2.94631	0.00131674	0.00981639
chr15:33570858:33572220	chr15	33570858	33572220	1363	0.862377	4.25817	0.00132133	0.00984079
chr4:179477904:179479119	chr4	179477904	179479119	1216	0.924873	4.18748	0.00133396	0.00991841
chr1:167090707:167091632	chr1	167090707	167091632	926	1.07008	3.67447	0.00134131	0.00995432
chr4:1297438:1300462	chr4	1297438	1300462	3025	0.6274	5.38511	0.00134191	0.00995432
chr7:101045086:101045957	chr7	101045086	101045957	872	1.30646	3.25067	0.00134279	0.00995432
chr7:142190769:142191470	chr7	142190769	142191470	702	1.26785	3.32465	0.0013449	0.0099667
chr10:4284281:4286307	chr10	4284281	4286307	2027	0.836395	4.44666	0.00134921	0.00999199

## Sheet: H3K27ac decreased in Fbw7-Del
Peakid	Chr	Start	End	Length	logFC	logCPM	PValue	FDR
chr1:192945463:192950508	chr1	192945463	192950508	5046	-3.78723	6.96077	3.49543e-22	2.61109e-18
chr12:49895121:49902350	chr12	49895121	49902350	7230	-3.45884	7.11939	2.7093e-21	1.01193e-17
chr8:6413266:6421425	chr8	6413266	6421425	8160	-3.04383	7.10237	6.57615e-21	2.01016e-17
chr4:104474311:104481285	chr4	104474311	104481285	6975	-3.95086	6.59738	1.19347e-19	2.43142e-16
chr4:11497152:11500730	chr4	11497152	11500730	3579	-3.66411	5.95478	1.0493e-18	1.30638e-15
chr7:23506627:23511926	chr7	23506627	23511926	5300	-3.07528	6.12069	3.07967e-18	3.00067e-15
chr4:169016085:169021768	chr4	169016085	169021768	5684	-2.43419	7.17088	6.27571e-18	5.4411e-15
chr3:185503104:185506247	chr3	185503104	185506247	3144	-3.24307	5.74593	8.43625e-18	7.00209e-15
chr9:21609616:21617750	chr9	21609616	21617750	8135	-1.91092	7.82495	6.94996e-17	4.42576e-14
chr7:129546008:129549870	chr7	129546008	129549870	3863	-3.21042	5.51238	1.19551e-16	6.69782e-14
chr10:28376621:28387153	chr10	28376621	28387153	10533	-1.91104	7.52721	1.22923e-16	6.71877e-14
chr10:101735660:101738484	chr10	101735660	101738484	2825	-2.52336	6.26725	1.3477e-16	7.02371e-14
chr7:23386486:23390993	chr7	23386486	23390993	4508	-2.6664	5.76762	5.22217e-16	2.1278e-13
chr4:11515546:11517464	chr4	11515546	11517464	1919	-4.44695	4.85571	6.44554e-16	2.53411e-13
chr1:192942550:192945085	chr1	192942550	192945085	2536	-3.31056	5.56667	6.97027e-16	2.69317e-13
chr10:105653370:105656733	chr10	105653370	105656733	3364	-2.55088	5.98245	7.1743e-16	2.72502e-13
chr17:36101417:36105262	chr17	36101417	36105262	3846	-3.69997	5.05827	7.3907e-16	2.76043e-13
chr1:43472427:43475287	chr1	43472427	43475287	2861	-3.84335	4.99425	1.3591e-15	4.54589e-13
chr1:94659335:94663894	chr1	94659335	94663894	4560	-2.69245	5.50177	3.42168e-15	9.95843e-13
chr4:11543371:11551551	chr4	11543371	11551551	8181	-1.84386	7.78581	4.2625e-15	1.13717e-12
chr4:169559397:169563352	chr4	169559397	169563352	3956	-3.06877	5.38723	5.29699e-15	1.39654e-12
chr4:11698043:11703130	chr4	11698043	11703130	5088	-1.6913	7.39149	5.59792e-15	1.44195e-12
chr4:95405684:95408614	chr4	95405684	95408614	2931	-2.69412	5.54486	5.89541e-15	1.48445e-12
chr10:82263440:82267048	chr10	82263440	82267048	3609	-2.15736	6.11468	6.22432e-15	1.54818e-12
chr1:66795225:66821757	chr1	66795225	66821757	26533	-1.59175	9.37212	7.28334e-15	1.77413e-12
chr12:49882976:49886038	chr12	49882976	49886038	3063	-2.44939	5.73945	1.05512e-14	2.43765e-12
chr12:49903532:49905820	chr12	49903532	49905820	2289	-3.0096	5.20669	1.23302e-14	2.79112e-12
chr17:73640802:73643514	chr17	73640802	73643514	2713	-2.68012	5.60119	1.26587e-14	2.81875e-12
chr1:8141886:8144829	chr1	8141886	8144829	2944	-1.92519	6.35073	1.53648e-14	3.34296e-12
chr2:227475082:227478295	chr2	227475082	227478295	3214	-2.00866	6.35426	2.13526e-14	4.51425e-12
chr10:114141604:114146019	chr10	114141604	114146019	4416	-1.97634	6.86427	2.43419e-14	5.00461e-12
chr4:169551318:169554972	chr4	169551318	169554972	3655	-2.86767	5.3269	3.13738e-14	6.22201e-12
chr10:32175508:32178934	chr10	32175508	32178934	3427	-2.41752	5.50505	3.2398e-14	6.30957e-12
chr4:30896233:30908159	chr4	30896233	30908159	11927	-1.50465	8.19006	3.45495e-14	6.61756e-12
chr13:30874362:30878065	chr13	30874362	30878065	3704	-2.9043	5.1584	3.64808e-14	6.92826e-12
chr1:94710051:94714232	chr1	94710051	94714232	4182	-2.15974	5.78592	3.85078e-14	7.25177e-12
chr4:11624663:11638741	chr4	11624663	11638741	14079	-1.47169	8.96544	5.37201e-14	9.70861e-12
chr4:75404247:75411755	chr4	75404247	75411755	7509	-1.70578	7.18471	8.16448e-14	1.40743e-11
chr10:114711191:114720198	chr10	114711191	114720198	9008	-1.40855	8.51457	8.69529e-14	1.47795e-11
chr4:11534815:11538989	chr4	11534815	11538989	4175	-2.88538	5.30604	8.70545e-14	1.47795e-11
chr1:66730813:66738648	chr1	66730813	66738648	7836	-1.46823	7.7481	9.29999e-14	1.55532e-11
chr5:92583803:92586807	chr5	92583803	92586807	3005	-1.99446	6.22983	1.00619e-13	1.64589e-11
chr8:28479781:28483656	chr8	28479781	28483656	3876	-1.92357	6.08606	1.20894e-13	1.94909e-11
chr12:65017882:65020192	chr12	65017882	65020192	2311	-2.25636	5.58841	1.60482e-13	2.46332e-11
chr4:169479556:169484835	chr4	169479556	169484835	5280	-1.93825	6.55296	1.61025e-13	2.46332e-11
chr6:43056395:43059389	chr6	43056395	43059389	2995	-2.31309	5.43567	1.91958e-13	2.8871e-11
chr6:43063113:43066017	chr6	43063113	43066017	2905	-2.28361	5.46428	1.98475e-13	2.96522e-11
chr4:11650913:11654457	chr4	11650913	11654457	3545	-1.79358	6.30741	2.00728e-13	2.97902e-11
chr7:129491690:129496835	chr7	129491690	129496835	5146	-1.83478	6.03961	2.10094e-13	3.0975e-11
chr17:6774422:6776453	chr17	6774422	6776453	2032	-2.98144	4.92233	2.13559e-13	3.10899e-11
chr12:49907644:49909668	chr12	49907644	49909668	2025	-2.76416	4.96167	2.71243e-13	3.92165e-11
chrX:46445190:46450264	chrX	46445190	46450264	5075	-2.01299	5.79565	3.06397e-13	4.37347e-11
chr8:126161825:126167234	chr8	126161825	126167234	5410	-1.41448	7.41348	3.15525e-13	4.43312e-11
chr4:99574386:99581732	chr4	99574386	99581732	7347	-1.63847	7.02602	3.30301e-13	4.59755e-11
chr10:114120094:114122850	chr10	114120094	114122850	2757	-2.18328	5.64734	4.32133e-13	5.73024e-11
chr16:68954110:68958207	chr16	68954110	68958207	4098	-1.79816	6.31371	4.44167e-13	5.85517e-11
chr10:114163948:114165109	chr10	114163948	114165109	1162	-3.45647	4.57545	4.56947e-13	5.95359e-11
chr4:11615275:11618863	chr4	11615275	11618863	3589	-1.60882	6.40971	6.17314e-13	7.81582e-11
chr5:92485764:92491900	chr5	92485764	92491900	6137	-1.46312	7.07005	6.60779e-13	8.22669e-11
chr7:130624553:130631581	chr7	130624553	130631581	7029	-1.59824	6.45246	6.57464e-13	8.22669e-11
chr12:132811645:132819362	chr12	132811645	132819362	7718	-1.90018	6.40438	6.77126e-13	8.38364e-11
chr7:116410165:116414561	chr7	116410165	116414561	4397	-2.05797	6.6249	8.26139e-13	9.90042e-11
chr6:130006925:130011709	chr6	130006925	130011709	4785	-1.66171	6.38599	9.00603e-13	1.06224e-10
chr2:81531071:81532670	chr2	81531071	81532670	1600	-3.2749	4.4244	1.27745e-12	1.42988e-10
chrX:13709742:13712494	chrX	13709742	13712494	2753	-3.06084	4.70359	1.43179e-12	1.57286e-10
chr17:42903324:42910474	chr17	42903324	42910474	7151	-1.36344	7.27093	1.45185e-12	1.58712e-10
chr5:91893518:91900016	chr5	91893518	91900016	6499	-1.31794	7.85144	1.56429e-12	1.6773e-10
chr4:11503836:11508821	chr4	11503836	11508821	4986	-1.35006	7.38381	1.94295e-12	2.0442e-10
chr17:39933233:39935125	chr17	39933233	39935125	1893	-3.52957	4.56014	2.39457e-12	2.47292e-10
chr10:32169787:32172600	chr10	32169787	32172600	2814	-2.69694	4.76624	2.87789e-12	2.95842e-10
chr17:79013300:79019707	chr17	79013300	79019707	6408	-1.4527	6.98465	2.97657e-12	3.04589e-10
chr8:6403155:6407029	chr8	6403155	6407029	3875	-2.3275	5.0728	3.03774e-12	3.09435e-10
chr6:150175390:150178939	chr6	150175390	150178939	3550	-1.93701	5.58898	3.67486e-12	3.69299e-10
chr19:50078439:50079726	chr19	50078439	50079726	1288	-3.25464	4.40075	4.44245e-12	4.36646e-10
chr4:168998271:168999920	chr4	168998271	168999920	1650	-2.45318	4.95684	4.79623e-12	4.67319e-10
chr17:75466892:75469285	chr17	75466892	75469285	2394	-2.35057	5.01127	4.93658e-12	4.77278e-10
chr7:129514436:129517068	chr7	129514436	129517068	2633	-2.32854	5.12929	5.1707e-12	4.97319e-10
chr10:101518848:101521562	chr10	101518848	101521562	2715	-1.57244	6.45532	6.20531e-12	5.81846e-10
chr3:111307043:111310211	chr3	111307043	111310211	3169	-2.43103	4.78992	8.95899e-12	8.16142e-10
chr9:21707711:21711978	chr9	21707711	21711978	4268	-1.53258	6.38271	1.5113e-11	1.28776e-09
chr6:49517548:49520006	chr6	49517548	49520006	2459	-2.36457	4.97312	1.55901e-11	1.32338e-09
chr10:114133264:114140958	chr10	114133264	114140958	7695	-1.42392	8.07203	1.75985e-11	1.47709e-09
chr19:33531455:33533819	chr19	33531455	33533819	2365	-1.59949	6.08019	1.77451e-11	1.47832e-09
chr3:114463027:114467082	chr3	114463027	114467082	4056	-1.38143	6.59498	1.77308e-11	1.47832e-09
chrX:46441213:46443667	chrX	46441213	46443667	2455	-2.28789	5.153	1.9013e-11	1.57226e-09
chr1:66788838:66792196	chr1	66788838	66792196	3359	-1.45202	6.23025	2.94551e-11	2.34379e-09
chr17:38335693:38337565	chr17	38335693	38337565	1873	-2.04614	5.21452	3.20199e-11	2.53557e-09
chr17:73526842:73528809	chr17	73526842	73528809	1968	-1.84402	5.47548	3.77287e-11	2.9055e-09
chr4:75577719:75581871	chr4	75577719	75581871	4153	-1.25135	7.38157	4.63673e-11	3.51044e-09
chr2:182811156:182815012	chr2	182811156	182815012	3857	-1.32585	6.43821	5.09859e-11	3.84711e-09
chr4:95452590:95453863	chr4	95452590	95453863	1274	-3.65418	3.76581	5.46201e-11	4.08012e-09
chr7:23999:24467	chr7	23999	24467	469	-2.05357	5.31592	5.50076e-11	4.09541e-09
chr2:57599680:57601116	chr2	57599680	57601116	1437	-3.85002	3.79551	5.67552e-11	4.19764e-09
chr14:54311782:54320027	chr14	54311782	54320027	8246	-1.14665	7.66749	5.92425e-11	4.33864e-09
chr2:219757494:219760781	chr2	219757494	219760781	3288	-2.07677	5.07714	6.31971e-11	4.58333e-09
chr10:114147141:114151669	chr10	114147141	114151669	4529	-1.56051	7.13872	6.42096e-11	4.64173e-09
chr4:75573338:75577344	chr4	75573338	75577344	4007	-1.32038	6.99221	6.653e-11	4.79401e-09
chr9:21770772:21772127	chr9	21770772	21772127	1356	-1.96375	5.08661	6.89039e-11	4.93335e-09
chr17:80816068:80818658	chr17	80816068	80818658	2591	-1.70853	5.44864	7.84408e-11	5.54529e-09
chr2:232484356:232488388	chr2	232484356	232488388	4033	-1.42609	6.05466	8.01491e-11	5.64824e-09
chr11:57499505:57501458	chr11	57499505	57501458	1954	-2.47451	4.49562	9.031e-11	6.28524e-09
chr2:189243961:189248159	chr2	189243961	189248159	4199	-1.34825	6.35231	9.77286e-11	6.78049e-09
chr7:129535574:129537708	chr7	129535574	129537708	2135	-2.8101	4.70338	9.95389e-11	6.84253e-09
chr1:66763269:66769549	chr1	66763269	66769549	6281	-1.22222	7.11235	1.00119e-10	6.86135e-09
chr2:9734419:9737191	chr2	9734419	9737191	2773	-1.9226	5.1774	1.05037e-10	7.13294e-09
chr4:95411880:95413129	chr4	95411880	95413129	1250	-3.47338	3.97718	1.07077e-10	7.24952e-09
chr2:62795371:62798198	chr2	62795371	62798198	2828	-1.4862	6.10194	1.18927e-10	7.93203e-09
chr12:53363184:53366225	chr12	53363184	53366225	3042	-1.63964	5.47051	1.35707e-10	8.89237e-09
chr6:88191711:88194876	chr6	88191711	88194876	3166	-1.32064	6.46331	1.48793e-10	9.58174e-09
chr1:27316581:27321995	chr1	27316581	27321995	5415	-1.28613	6.68671	1.54496e-10	9.86399e-09
chr11:27894617:27899019	chr11	27894617	27899019	4403	-1.56339	5.83417	1.61668e-10	1.02864e-08
chr6:159118517:159120514	chr6	159118517	159120514	1998	-1.89614	5.19866	2.04586e-10	1.26651e-08
chr6:42370981:42373192	chr6	42370981	42373192	2212	-1.68386	5.6093	2.44935e-10	1.48753e-08
chr19:24215791:24217329	chr19	24215791	24217329	1539	-4.27083	3.57122	2.64866e-10	1.59132e-08
chr6:47002244:47015885	chr6	47002244	47015885	13642	-1.00985	8.22194	2.89347e-10	1.71089e-08
chr12:46843398:46850687	chr12	46843398	46850687	7290	-1.03958	7.89762	3.09881e-10	1.82269e-08
chr12:50612097:50619474	chr12	50612097	50619474	7378	-1.07696	7.43711	3.20256e-10	1.87387e-08
chr4:95332916:95334859	chr4	95332916	95334859	1944	-2.05541	4.84977	3.79667e-10	2.19675e-08
chr2:55319560:55321301	chr2	55319560	55321301	1742	-2.85604	4.54113	4.1041e-10	2.35225e-08
chr7:20390134:20393431	chr7	20390134	20393431	3298	-1.31386	6.29074	4.18944e-10	2.39503e-08
chr14:31628298:31630867	chr14	31628298	31630867	2570	-1.5323	5.51298	4.4681e-10	2.54784e-08
chr8:130895565:130897926	chr8	130895565	130897926	2362	-1.53028	5.57945	4.63369e-10	2.62889e-08
chr12:76288612:76290815	chr12	76288612	76290815	2204	-1.87014	5.1379	4.90352e-10	2.75408e-08
chr7:116104492:116106767	chr7	116104492	116106767	2276	-1.63209	5.51362	4.94302e-10	2.76932e-08
chr4:75543282:75552172	chr4	75543282	75552172	8891	-1.07058	8.45951	5.03507e-10	2.7999e-08
chr8:142286392:142287666	chr8	142286392	142287666	1275	-1.70458	5.46505	5.26489e-10	2.91324e-08
chr16:69025996:69028402	chr16	69025996	69028402	2407	-1.87782	4.94829	5.40794e-10	2.97769e-08
chr12:14412805:14414171	chr12	14412805	14414171	1367	-2.5466	4.4657	5.64374e-10	3.08478e-08
chr1:162319243:162320532	chr1	162319243	162320532	1290	-3.22398	3.76827	6.27383e-10	3.36355e-08
chr5:45277625:45279714	chr5	45277625	45279714	2090	-1.74546	5.30432	6.55081e-10	3.49532e-08
chr20:49174740:49176097	chr20	49174740	49176097	1358	-2.11289	4.88815	6.61499e-10	3.52119e-08
chr2:224660963:224662806	chr2	224660963	224662806	1844	-2.14849	4.69103	7.37214e-10	3.89646e-08
chr17:74049535:74050906	chr17	74049535	74050906	1372	-1.95887	4.9343	7.5076e-10	3.95862e-08
chr1:66725901:66728592	chr1	66725901	66728592	2692	-1.30638	5.9471	8.07261e-10	4.2224e-08
chr5:142203950:142207373	chr5	142203950	142207373	3424	-1.20227	6.35158	8.84882e-10	4.51713e-08
chr10:101725472:101727607	chr10	101725472	101727607	2136	-1.40664	5.98269	9.20386e-10	4.67707e-08
chr3:111303212:111305681	chr3	111303212	111305681	2470	-1.63949	5.4251	9.82917e-10	4.96107e-08
chr5:92526847:92530401	chr5	92526847	92530401	3555	-1.15711	6.41412	1.00958e-09	5.08419e-08
chr12:46835225:46841022	chr12	46835225	46841022	5798	-1.02821	7.52484	1.11445e-09	5.54995e-08
chr4:95427995:95429819	chr4	95427995	95429819	1825	-2.53525	4.12086	1.20281e-09	5.91118e-08
chr1:66758085:66763153	chr1	66758085	66763153	5069	-1.11831	7.26518	1.30557e-09	6.37425e-08
chr2:70362168:70364393	chr2	70362168	70364393	2226	-1.31507	5.87026	1.34166e-09	6.50794e-08
chr16:75044199:75047641	chr16	75044199	75047641	3443	-1.15597	6.60501	1.34926e-09	6.51656e-08
chr8:8860280:8866008	chr8	8860280	8866008	5729	-1.07652	6.90214	1.34735e-09	6.51656e-08
chr7:73706423:73707754	chr7	73706423	73707754	1332	-2.70079	4.07077	1.40994e-09	6.76588e-08
chr7:129540797:129541604	chr7	129540797	129541604	808	-3.26973	3.58378	1.46973e-09	7.03774e-08
chr3:111328425:111330867	chr3	111328425	111330867	2443	-2.30849	4.36242	1.53075e-09	7.28323e-08
chr4:169506424:169511327	chr4	169506424	169511327	4904	-1.25593	6.53039	1.58687e-09	7.50249e-08
chr12:65062786:65070086	chr12	65062786	65070086	7301	-1.01012	7.3792	1.73157e-09	8.05071e-08
chr3:111299458:111302284	chr3	111299458	111302284	2827	-1.741	5.12326	2.0399e-09	9.27267e-08
chr6:143993925:143996213	chr6	143993925	143996213	2289	-1.77908	4.92172	2.03816e-09	9.27267e-08
chr8:22239677:22241680	chr8	22239677	22241680	2004	-2.10427	4.63244	2.05831e-09	9.29044e-08
chr10:32201126:32203140	chr10	32201126	32203140	2015	-1.80882	4.81179	2.17527e-09	9.74958e-08
chr22:24679170:24681543	chr22	24679170	24681543	2374	-1.77901	4.8577	2.22154e-09	9.93706e-08
chr17:39928077:39930331	chr17	39928077	39930331	2255	-2.26868	4.36809	2.43273e-09	1.086e-07
chr12:20974501:20977056	chr12	20974501	20977056	2556	-1.49874	5.33546	2.4461e-09	1.08936e-07
chr9:133721936:133723269	chr9	133721936	133723269	1334	-2.2633	4.1977	2.44996e-09	1.08936e-07
chr20:34463038:34464341	chr20	34463038	34464341	1304	-1.99897	4.57591	2.61215e-09	1.15233e-07
chr5:150159967:150164386	chr5	150159967	150164386	4420	-1.12418	6.41237	2.93641e-09	1.27282e-07
chr6:142621514:142625611	chr6	142621514	142625611	4098	-1.06667	6.59761	3.38864e-09	1.44922e-07
chr22:30699562:30702191	chr22	30699562	30702191	2630	-1.71526	5.01894	3.4518e-09	1.47343e-07
chr8:8868034:8873542	chr8	8868034	8873542	5509	-1.09254	7.39239	3.58425e-09	1.52416e-07
chr4:30742604:30749363	chr4	30742604	30749363	6760	-0.937695	7.83539	3.60369e-09	1.52811e-07
chr5:115175533:115184202	chr5	115175533	115184202	8670	-0.950704	7.77463	3.60719e-09	1.52811e-07
chr5:91886182:91891301	chr5	91886182	91891301	5120	-0.994515	7.82289	3.73665e-09	1.57107e-07
chr16:22033758:22043116	chr16	22033758	22043116	9359	-0.983842	7.62506	3.77006e-09	1.58216e-07
chr2:188403654:188413621	chr2	188403654	188413621	9968	-0.916588	8.33616	4.27775e-09	1.77856e-07
chr2:238771769:238777002	chr2	238771769	238777002	5234	-1.04364	6.95024	4.3387e-09	1.79857e-07
chr8:55063052:55064998	chr8	55063052	55064998	1947	-2.56251	4.24854	4.56891e-09	1.8787e-07
chr4:30912680:30923315	chr4	30912680	30923315	10636	-0.908344	8.28006	4.68725e-09	1.92032e-07
chr19:23577425:23578770	chr19	23577425	23578770	1346	-3.85469	3.42113	4.7563e-09	1.94151e-07
chr10:101742494:101744377	chr10	101742494	101744377	1884	-2.26916	4.26074	5.04462e-09	2.04801e-07
chr9:112239292:112240575	chr9	112239292	112240575	1284	-3.0178	3.60187	5.09627e-09	2.06523e-07
chr7:92391723:92398256	chr7	92391723	92398256	6534	-0.975296	7.17241	5.22799e-09	2.10718e-07
chr5:92521322:92522836	chr5	92521322	92522836	1515	-2.00776	4.49487	5.52304e-09	2.2102e-07
chr1:84811898:84815279	chr1	84811898	84815279	3382	-1.12284	6.29596	6.52029e-09	2.56801e-07
chr5:92915175:92919866	chr5	92915175	92919866	4692	-1.18198	6.08935	6.83781e-09	2.67426e-07
chr2:233716599:233720296	chr2	233716599	233720296	3698	-1.58279	5.20367	7.50824e-09	2.90103e-07
chr12:65072785:65074429	chr12	65072785	65074429	1645	-1.62386	4.94494	7.88829e-09	3.04263e-07
chr4:162475095:162477245	chr4	162475095	162477245	2151	-1.61465	4.95875	8.42124e-09	3.22598e-07
chr7:92261737:92266009	chr7	92261737	92266009	4273	-1.02653	6.5911	8.49417e-09	3.24837e-07
chr12:76281297:76287872	chr12	76281297	76287872	6576	-0.97908	7.01479	8.75329e-09	3.33608e-07
chr12:104665442:104666767	chr12	104665442	104666767	1326	-2.24985	4.23517	8.85718e-09	3.35854e-07
chr1:36625583:36627303	chr1	36625583	36627303	1721	-1.91143	4.44418	9.22673e-09	3.481e-07
chr12:14409253:14411919	chr12	14409253	14411919	2667	-1.67833	5.46915	9.58567e-09	3.60428e-07
chr7:35031277:35032598	chr7	35031277	35032598	1322	-2.53764	3.81217	1.02854e-08	3.8352e-07
chr19:53167760:53169308	chr19	53167760	53169308	1549	-2.68625	3.71487	1.04007e-08	3.87177e-07
chr10:28342309:28345186	chr10	28342309	28345186	2878	-1.11219	6.07374	1.19819e-08	4.40186e-07
chr19:58314930:58315819	chr19	58314930	58315819	890	-3.79823	3.16437	1.29798e-08	4.73742e-07
chr3:185262720:185263757	chr3	185262720	185263757	1038	-2.35722	3.97432	1.31319e-08	4.78514e-07
chr7:20008905:20010948	chr7	20008905	20010948	2044	-1.38805	5.27469	1.34096e-08	4.87841e-07
chr3:111577109:111580255	chr3	111577109	111580255	3147	-1.21711	5.74592	1.43885e-08	5.15091e-07
chr13:107185819:107187324	chr13	107185819	107187324	1506	-2.13029	4.18271	1.45374e-08	5.19589e-07
chr17:59644082:59647466	chr17	59644082	59647466	3385	-1.32676	5.5947	1.54076e-08	5.48071e-07
chr7:129483183:129488521	chr7	129483183	129488521	5339	-0.962573	6.79208	1.5466e-08	5.48408e-07
chr2:8773384:8774533	chr2	8773384	8774533	1150	-2.26069	4.06284	1.61044e-08	5.67452e-07
chr7:116440294:116442011	chr7	116440294	116442011	1718	-1.53849	5.09713	1.73295e-08	6.03034e-07
chr11:34997516:35001189	chr11	34997516	35001189	3674	-0.990725	6.61426	1.74895e-08	6.07658e-07
chr19:19481221:19482678	chr19	19481221	19482678	1458	-1.7942	4.59415	1.79249e-08	6.21822e-07
chr17:73552738:73554207	chr17	73552738	73554207	1470	-1.89369	4.4319	1.90626e-08	6.5621e-07
chr2:182606284:182609496	chr2	182606284	182609496	3213	-1.13834	6.04829	1.96938e-08	6.769e-07
chr2:234155432:234157023	chr2	234155432	234157023	1592	-1.33476	5.60438	2.08706e-08	7.15154e-07
chr18:74188258:74189756	chr18	74188258	74189756	1499	-2.15149	4.15903	2.12907e-08	7.28012e-07
chr12:98792551:98797305	chr12	98792551	98797305	4755	-1.07349	6.46061	2.18119e-08	7.42866e-07
chr12:50925247:50928078	chr12	50925247	50928078	2832	-1.0816	6.34701	2.19349e-08	7.44789e-07
chr9:21787256:21790374	chr9	21787256	21790374	3119	-1.0301	6.6708	2.23575e-08	7.57992e-07
chr17:876111:877018	chr17	876111	877018	908	-2.82471	3.45332	2.27626e-08	7.67083e-07
chr7:4784120:4785653	chr7	4784120	4785653	1534	-1.88673	4.54158	2.42384e-08	8.1072e-07
chr1:193101439:193102866	chr1	193101439	193102866	1428	-1.71358	4.89454	2.62194e-08	8.7307e-07
chr4:75226584:75243995	chr4	75226584	75243995	17412	-0.908238	8.74174	2.77328e-08	9.1396e-07
chr2:37812649:37818145	chr2	37812649	37818145	5497	-0.991411	7.08789	2.97507e-08	9.74725e-07
chr4:24599612:24600424	chr4	24599612	24600424	813	-2.78905	3.51164	3.09502e-08	1.00813e-06
chr8:99176977:99179877	chr8	99176977	99179877	2901	-1.30721	5.55371	3.12754e-08	1.01724e-06
chr3:185815096:185817453	chr3	185815096	185817453	2358	-1.84416	4.41746	3.17721e-08	1.03041e-06
chr3:45179332:45183199	chr3	45179332	45183199	3868	-1.21336	5.58167	3.23059e-08	1.0447e-06
chr4:188507453:188508415	chr4	188507453	188508415	963	-3.24199	3.28503	3.25252e-08	1.05027e-06
chr10:69894897:69897007	chr10	69894897	69897007	2111	-1.30056	5.62593	3.26267e-08	1.05052e-06
chr17:42871923:42874158	chr17	42871923	42874158	2236	-1.54973	5.04429	3.59596e-08	1.14393e-06
chr1:8121102:8122472	chr1	8121102	8122472	1371	-1.7101	4.63915	4.0592e-08	1.27602e-06
chr2:188417626:188420155	chr2	188417626	188420155	2530	-1.17329	5.71963	4.05981e-08	1.27602e-06
chr18:29951269:29954804	chr18	29951269	29954804	3536	-1.06885	5.96674	4.31996e-08	1.35399e-06
chr11:119088603:119089764	chr11	119088603	119089764	1162	-2.11429	4.1553	4.69164e-08	1.46434e-06
chr20:45832842:45835279	chr20	45832842	45835279	2438	-1.52816	4.87482	4.81461e-08	1.50063e-06
chr10:106087465:106092342	chr10	106087465	106092342	4878	-0.902652	7.30235	5.28668e-08	1.63188e-06
chr1:204071629:204074557	chr1	204071629	204074557	2929	-1.30903	5.25369	5.32876e-08	1.64035e-06
chr14:54349336:54350130	chr14	54349336	54350130	795	-2.48468	3.76742	5.49549e-08	1.68473e-06
chr19:10848876:10850410	chr19	10848876	10850410	1535	-3.05491	3.40844	5.51465e-08	1.6883e-06
chr3:111665404:111667091	chr3	111665404	111667091	1688	-1.64018	4.80034	5.67752e-08	1.72637e-06
chr19:32863471:32866172	chr19	32863471	32866172	2702	-1.13073	5.79717	5.80596e-08	1.76303e-06
chr3:111520304:111522654	chr3	111520304	111522654	2351	-1.62822	5.03345	5.83842e-08	1.77049e-06
chr2:191470475:191474819	chr2	191470475	191474819	4345	-1.0166	6.88971	5.93793e-08	1.79823e-06
chr20:60734540:60735254	chr20	60734540	60735254	715	-2.97035	3.32336	5.95862e-08	1.79963e-06
chr11:108754039:108759834	chr11	108754039	108759834	5796	-0.888469	7.1982	6.0782e-08	1.83081e-06
chr12:122594446:122599264	chr12	122594446	122599264	4819	-0.979743	6.45186	6.29643e-08	1.894e-06
chr1:52086744:52089104	chr1	52086744	52089104	2361	-1.29272	5.32183	6.42724e-08	1.92817e-06
chr10:34844727:34846121	chr10	34844727	34846121	1395	-1.96233	4.28139	6.53921e-08	1.95914e-06
chr6:25311348:25312567	chr6	25311348	25312567	1220	-2.06217	3.94949	6.60011e-08	1.97211e-06
chr9:21775864:21780190	chr9	21775864	21780190	4327	-0.824189	7.32198	6.69749e-08	1.99854e-06
chr2:227623048:227626795	chr2	227623048	227626795	3748	-0.835198	7.17804	7.03083e-08	2.09244e-06
chr7:91889000:91890405	chr7	91889000	91890405	1406	-1.72239	4.5389	7.12517e-08	2.11644e-06
chr10:28399352:28403980	chr10	28399352	28403980	4629	-0.874771	7.21568	7.48217e-08	2.20916e-06
chr10:32164854:32166854	chr10	32164854	32166854	2001	-1.89515	4.48361	7.64508e-08	2.25429e-06
chr7:19997303:19999266	chr7	19997303	19999266	1964	-1.24062	5.43031	7.90766e-08	2.31951e-06
chr10:101721247:101724506	chr10	101721247	101724506	3260	-1.09494	6.31732	8.01424e-08	2.3477e-06
chr16:88836149:88838829	chr16	88836149	88838829	2681	-1.22617	5.48291	8.06846e-08	2.3605e-06
chr17:4232785:4233751	chr17	4232785	4233751	967	-2.24715	3.77658	8.14855e-08	2.38082e-06
chr10:28393388:28397921	chr10	28393388	28397921	4534	-0.982986	6.34593	8.43097e-08	2.45693e-06
chr8:28487429:28489410	chr8	28487429	28489410	1982	-1.16255	5.74891	8.4446e-08	2.45771e-06
chr16:66545355:66546336	chr16	66545355	66546336	982	-2.0425	3.98134	8.93346e-08	2.57988e-06
chr12:76374790:76381047	chr12	76374790	76381047	6258	-0.894803	6.79282	9.04643e-08	2.60579e-06
chr3:111312949:111314799	chr3	111312949	111314799	1851	-2.36569	3.79754	9.17867e-08	2.63141e-06
chr3:87381959:87383385	chr3	87381959	87383385	1427	-1.93447	4.29988	9.31772e-08	2.6668e-06
chr19:23456167:23457354	chr19	23456167	23457354	1188	-4.06849	2.81898	1.04551e-07	2.93607e-06
chr4:169466730:169473282	chr4	169466730	169473282	6553	-0.841048	7.34555	1.05098e-07	2.94775e-06
chr12:76255180:76257871	chr12	76255180	76257871	2692	-1.16378	5.69138	1.06355e-07	2.97185e-06
chr5:92495662:92502124	chr5	92495662	92502124	6463	-0.799102	7.95058	1.11227e-07	3.08872e-06
chr20:399555:401005	chr20	399555	401005	1451	-2.24873	3.77019	1.20005e-07	3.31604e-06
chr7:116072617:116076060	chr7	116072617	116076060	3444	-1.1014	6.03382	1.23091e-07	3.39676e-06
chr2:227483150:227484796	chr2	227483150	227484796	1647	-1.40725	4.94638	1.29045e-07	3.53964e-06
chr22:36138156:36139678	chr22	36138156	36139678	1523	-1.84346	4.38625	1.31937e-07	3.61014e-06
chr11:27902462:27905158	chr11	27902462	27905158	2697	-1.21148	5.45915	1.33672e-07	3.65316e-06
chr2:43695665:43697309	chr2	43695665	43697309	1645	-1.84739	4.15613	1.35267e-07	3.69225e-06
chr6:129503016:129506574	chr6	129503016	129506574	3559	-1.28094	5.38265	1.36974e-07	3.72522e-06
chr10:54093915:54096012	chr10	54093915	54096012	2098	-1.36454	5.17575	1.39714e-07	3.79513e-06
chr2:219760831:219762044	chr2	219760831	219762044	1214	-1.98729	3.98808	1.49823e-07	4.03376e-06
chr4:169493617:169496980	chr4	169493617	169496980	3364	-1.07708	5.89089	1.50118e-07	4.03376e-06
chr3:111569954:111571476	chr3	111569954	111571476	1523	-1.34426	5.26502	1.55899e-07	4.17905e-06
chr7:64001787:64002639	chr7	64001787	64002639	853	-2.18262	3.72938	1.56184e-07	4.18171e-06
chr3:185264755:185265530	chr3	185264755	185265530	776	-2.64859	3.50998	1.60664e-07	4.28628e-06
chr17:872215:873937	chr17	872215	873937	1723	-1.85976	4.06267	1.61039e-07	4.28733e-06
chr5:92694779:92696178	chr5	92694779	92696178	1400	-1.6283	4.49224	1.62749e-07	4.32645e-06
chr7:20368616:20372361	chr7	20368616	20372361	3746	-1.18048	5.92064	1.64818e-07	4.37109e-06
chr18:18894728:18896513	chr18	18894728	18896513	1786	-1.80592	4.17453	1.6926e-07	4.47301e-06
chr2:182816501:182824751	chr2	182816501	182824751	8251	-0.753979	8.22673	1.73241e-07	4.56209e-06
chr4:10530663:10532883	chr4	10530663	10532883	2221	-1.33971	5.13577	1.75021e-07	4.60354e-06
chr11:71782469:71784690	chr11	71782469	71784690	2222	-1.57135	4.69591	1.76105e-07	4.62662e-06
chr7:92380392:92383620	chr7	92380392	92383620	3229	-0.98692	6.03587	1.78831e-07	4.69273e-06
chr12:13324643:13327189	chr12	13324643	13327189	2547	-1.6039	4.68876	1.88915e-07	4.93424e-06
chr4:11749497:11750768	chr4	11749497	11750768	1272	-1.81836	4.60421	2.01275e-07	5.2025e-06
chr13:107222273:107223544	chr13	107222273	107223544	1272	-1.38845	5.0189	2.1577e-07	5.56433e-06
chr2:162947829:162948919	chr2	162947829	162948919	1091	-2.58723	3.45254	2.18125e-07	5.61216e-06
chr1:8130050:8139460	chr1	8130050	8139460	9411	-0.749667	8.06168	2.2186e-07	5.69518e-06
chr7:79811731:79815317	chr7	79811731	79815317	3587	-0.961622	6.06796	2.3542e-07	6.02255e-06
chr12:14546307:14548187	chr12	14546307	14548187	1881	-1.23917	5.58189	2.37411e-07	6.05277e-06
chr11:1060533:1061736	chr11	1060533	1061736	1204	-1.79017	4.42259	2.38662e-07	6.07084e-06
chr3:45133591:45135124	chr3	45133591	45135124	1534	-1.76724	4.24609	2.45596e-07	6.21197e-06
chr12:1582549:1585470	chr12	1582549	1585470	2922	-1.0118	5.83668	2.4768e-07	6.24355e-06
chr2:225349405:225351715	chr2	225349405	225351715	2311	-1.12016	5.52	2.49717e-07	6.28781e-06
chr7:116065249:116068601	chr7	116065249	116068601	3353	-0.841632	7.01607	2.52591e-07	6.35305e-06
chr10:75838881:75840339	chr10	75838881	75840339	1459	-1.78665	4.32428	2.54631e-07	6.39717e-06
chr4:95465086:95467566	chr4	95465086	95467566	2481	-1.63307	4.74253	2.64862e-07	6.62451e-06
chr18:8799714:8802046	chr18	8799714	8802046	2333	-1.25544	5.28155	2.94864e-07	7.29348e-06
chr2:200297616:200298745	chr2	200297616	200298745	1130	-2.25499	3.66078	3.05554e-07	7.52468e-06
chr4:11641834:11642801	chr4	11641834	11642801	968	-1.83789	4.08468	3.20346e-07	7.84584e-06
chr5:73927062:73929499	chr5	73927062	73929499	2438	-1.35295	4.99313	3.22113e-07	7.88052e-06
chr16:84762822:84767647	chr16	84762822	84767647	4826	-0.85701	6.91747	3.2706e-07	7.9841e-06
chr8:126153490:126154706	chr8	126153490	126154706	1217	-1.56576	4.66817	3.30075e-07	8.04895e-06
chr10:29921799:29925457	chr10	29921799	29925457	3659	-1.00014	6.00399	3.33092e-07	8.09608e-06
chr4:95468311:95470843	chr4	95468311	95470843	2533	-1.33579	5.39048	3.35328e-07	8.13923e-06
chr21:15905816:15906503	chr21	15905816	15906503	688	-3.94077	2.6893	3.38297e-07	8.17825e-06
chr20:10539337:10540750	chr20	10539337	10540750	1414	-1.83632	4.14508	3.4933e-07	8.43587e-06
chr9:6787840:6789016	chr9	6787840	6789016	1177	-2.15068	3.64799	3.56224e-07	8.5931e-06
chr14:100045589:100047181	chr14	100045589	100047181	1593	-1.25081	5.14816	3.58401e-07	8.61962e-06
chr4:169525239:169526912	chr4	169525239	169526912	1674	-1.52294	4.65983	3.5925e-07	8.62894e-06
chr3:111592540:111593968	chr3	111592540	111593968	1429	-1.66927	4.51465	3.61244e-07	8.64902e-06
chr4:75582186:75596811	chr4	75582186	75596811	14626	-0.815157	9.09964	3.67406e-07	8.7778e-06
chr12:76326508:76329792	chr12	76326508	76329792	3285	-1.08405	5.61046	3.70358e-07	8.82012e-06
chr16:19141258:19143608	chr16	19141258	19143608	2351	-1.30586	4.9808	3.70046e-07	8.82012e-06
chr9:21780791:21785871	chr9	21780791	21785871	5081	-0.778155	7.4974	3.74057e-07	8.89873e-06
chr8:62679091:62680456	chr8	62679091	62680456	1366	-1.56138	4.89191	3.77409e-07	8.94998e-06
chr20:45828961:45829908	chr20	45828961	45829908	948	-2.69146	3.43884	3.80755e-07	9.01979e-06
chr4:75563702:75568258	chr4	75563702	75568258	4557	-0.91263	6.38006	3.9443e-07	9.26538e-06
chr12:76411504:76417134	chr12	76411504	76417134	5631	-0.852846	7.07193	3.98719e-07	9.34654e-06
chr19:38209837:38210963	chr19	38209837	38210963	1127	-2.37165	3.5323	4.01714e-07	9.40692e-06
chr19:47428239:47429043	chr19	47428239	47429043	805	-2.30867	3.56262	4.03989e-07	9.45029e-06
chr9:91913358:91914769	chr9	91913358	91914769	1412	-1.41831	4.72485	4.07479e-07	9.52202e-06
chr5:172234040:172235397	chr5	172234040	172235397	1358	-1.82372	4.10786	4.12041e-07	9.60858e-06
chr17:79855139:79857260	chr17	79855139	79857260	2122	-1.52357	4.49496	4.12535e-07	9.61008e-06
chr21:43352217:43354114	chr21	43352217	43354114	1898	-1.39531	4.74421	4.21942e-07	9.81902e-06
chr2:86162502:86164345	chr2	86162502	86164345	1844	-1.40484	4.91727	4.2289e-07	9.83089e-06
chr13:20368749:20369329	chr13	20368749	20369329	581	-2.66554	3.32517	4.40273e-07	1.02032e-05
chr12:64255013:64256804	chr12	64255013	64256804	1792	-1.50756	4.58477	4.46029e-07	1.03153e-05
chr11:121895961:121897176	chr11	121895961	121897176	1216	-1.67182	4.3211	4.50817e-07	1.03813e-05
chr3:152044947:152047588	chr3	152044947	152047588	2642	-1.15235	5.36489	4.52347e-07	1.03864e-05
chr18:33057494:33060837	chr18	33057494	33060837	3344	-0.918146	6.30274	4.53093e-07	1.03929e-05
chr12:38675978:38677699	chr12	38675978	38677699	1722	-1.93895	3.90278	4.64573e-07	1.06019e-05
chr1:113999110:114000596	chr1	113999110	114000596	1487	-1.21626	5.15687	4.66513e-07	1.06245e-05
chr19:17599150:17600302	chr19	17599150	17600302	1153	-1.98825	3.89078	4.72276e-07	1.07449e-05
chr17:19063738:19066904	chr17	19063738	19066904	3167	-1.06677	5.48416	4.89867e-07	1.11113e-05
chr5:76119278:76120318	chr5	76119278	76120318	1041	-1.7259	4.14471	5.1143e-07	1.15652e-05
chr6:86112732:86114820	chr6	86112732	86114820	2089	-1.51242	4.72826	5.18541e-07	1.16907e-05
chr3:11253808:11254856	chr3	11253808	11254856	1049	-2.37221	3.4583	5.23361e-07	1.17875e-05
chr1:153071839:153073682	chr1	153071839	153073682	1844	-1.68212	4.43383	5.27456e-07	1.18559e-05
chr8:96078306:96080426	chr8	96078306	96080426	2121	-1.11184	5.44123	5.32468e-07	1.19446e-05
chr14:61990046:61994334	chr14	61990046	61994334	4289	-0.912157	6.32831	5.37025e-07	1.20227e-05
chr4:169417176:169419783	chr4	169417176	169419783	2608	-1.20004	5.32098	5.38839e-07	1.20513e-05
chr3:111527173:111528340	chr3	111527173	111528340	1168	-2.23596	3.57063	5.40613e-07	1.20789e-05
chr15:101299063:101301156	chr15	101299063	101301156	2094	-1.31914	4.86461	5.54135e-07	1.23441e-05
chr12:113643666:113644385	chr12	113643666	113644385	720	-2.15585	3.59212	5.65372e-07	1.25445e-05
chr11:101989361:101991912	chr11	101989361	101991912	2552	-1.20477	5.17167	6.11595e-07	1.34503e-05
chr4:75553269:75562661	chr4	75553269	75562661	9393	-0.779873	8.11848	6.87012e-07	1.49766e-05
chr7:116149858:116155972	chr7	116149858	116155972	6115	-0.852978	7.46816	6.93478e-07	1.50736e-05
chr9:139119611:139120989	chr9	139119611	139120989	1379	-2.23121	3.57072	6.95258e-07	1.50976e-05
chr17:55371688:55374252	chr17	55371688	55374252	2565	-1.0052	5.75772	6.97627e-07	1.51344e-05
chr11:112033729:112035326	chr11	112033729	112035326	1598	-1.43139	4.62735	7.44345e-07	1.60392e-05
chr17:43389009:43390758	chr17	43389009	43390758	1750	-1.29403	5.17998	7.53434e-07	1.61884e-05
chr5:49962778:49964927	chr5	49962778	49964927	2150	-1.15664	5.26709	7.75617e-07	1.66172e-05
chr6:130355621:130356027	chr6	130355621	130356027	407	-2.16062	3.58421	7.91401e-07	1.6923e-05
chr8:126185630:126190065	chr8	126185630	126190065	4436	-0.755569	7.16549	8.02505e-07	1.71278e-05
chr15:67340630:67342534	chr15	67340630	67342534	1905	-1.11082	5.27193	8.09202e-07	1.72378e-05
chr11:48007565:48010222	chr11	48007565	48010222	2658	-0.933328	6.07529	8.23655e-07	1.75124e-05
chr15:75952905:75954107	chr15	75952905	75954107	1203	-1.94179	3.80661	8.27794e-07	1.75838e-05
chr6:71107989:71109678	chr6	71107989	71109678	1690	-1.46579	4.65476	8.29224e-07	1.75975e-05
chr5:142198304:142203044	chr5	142198304	142203044	4741	-0.818113	6.53286	8.30316e-07	1.7604e-05
chr20:48290727:48297007	chr20	48290727	48297007	6281	-0.715702	8.20561	8.58343e-07	1.81467e-05
chr7:129469178:129472755	chr7	129469178	129472755	3578	-0.911317	6.14549	8.99065e-07	1.89533e-05
chr12:65727975:65730014	chr12	65727975	65730014	2040	-1.31791	4.83166	9.2696e-07	1.94688e-05
chr16:22057009:22059508	chr16	22057009	22059508	2500	-1.28598	4.91471	9.34351e-07	1.96056e-05
chr21:45130753:45133088	chr21	45130753	45133088	2336	-0.997894	5.73005	9.80381e-07	2.04553e-05
chr8:38261380:38265190	chr8	38261380	38265190	3811	-0.854658	7.05714	9.94236e-07	2.07071e-05
chr5:92453121:92454894	chr5	92453121	92454894	1774	-1.76096	4.3082	1.02019e-06	2.12279e-05
chr17:40561220:40562764	chr17	40561220	40562764	1545	-1.17027	5.39011	1.03142e-06	2.14344e-05
chr2:182754369:182762037	chr2	182754369	182762037	7669	-0.720493	7.50945	1.04959e-06	2.17589e-05
chr3:111620100:111626323	chr3	111620100	111626323	6224	-0.943244	8.00908	1.08029e-06	2.23539e-05
chr12:76418342:76423426	chr12	76418342	76423426	5085	-0.846166	6.36922	1.08799e-06	2.24925e-05
chr17:2309353:2311508	chr17	2309353	2311508	2156	-1.43601	5.35639	1.09422e-06	2.26003e-05
chr1:192668889:192672412	chr1	192668889	192672412	3524	-0.827701	6.64969	1.1009e-06	2.27174e-05
chr10:3851063:3853707	chr10	3851063	3853707	2645	-1.03759	5.43314	1.15044e-06	2.36526e-05
chr3:129375573:129375895	chr3	129375573	129375895	323	-3.53458	2.68951	1.19083e-06	2.44159e-05
chr7:23396885:23398077	chr7	23396885	23398077	1193	-2.05034	3.78729	1.2027e-06	2.46367e-05
chr1:84736997:84738450	chr1	84736997	84738450	1454	-1.48065	4.37599	1.25866e-06	2.56191e-05
chr1:193084662:193085442	chr1	193084662	193085442	781	-1.53983	4.2357	1.32659e-06	2.68797e-05
chr7:116442313:116445440	chr7	116442313	116445440	3128	-1.00767	5.58128	1.33738e-06	2.70737e-05
chr9:38007715:38009904	chr9	38007715	38009904	2190	-1.06577	5.41746	1.34883e-06	2.72317e-05
chr6:166943608:166944340	chr6	166943608	166944340	733	-2.65219	3.07408	1.38713e-06	2.79296e-05
chr17:42895866:42899616	chr17	42895866	42899616	3751	-0.770988	6.64427	1.40779e-06	2.82947e-05
chr8:6441888:6443636	chr8	6441888	6443636	1749	-1.28389	4.75807	1.42486e-06	2.86122e-05
chr4:169400511:169411403	chr4	169400511	169411403	10893	-0.752284	8.45544	1.45177e-06	2.91003e-05
chr1:92201889:92203387	chr1	92201889	92203387	1499	-1.30774	4.96534	1.52193e-06	3.03434e-05
chr12:76370055:76374482	chr12	76370055	76374482	4428	-0.761577	7.10683	1.59918e-06	3.17429e-05
chr7:92461169:92466909	chr7	92461169	92466909	5741	-1.02009	6.3183	1.60765e-06	3.18828e-05
chr5:49736751:49737527	chr5	49736751	49737527	777	-2.97164	2.72536	1.66221e-06	3.28775e-05
chr16:89393700:89397247	chr16	89393700	89397247	3548	-0.953898	5.78278	1.71272e-06	3.38466e-05
chr6:145803998:145805431	chr6	145803998	145805431	1434	-1.60878	4.48395	1.71986e-06	3.39578e-05
chr6:42282157:42285095	chr6	42282157	42285095	2939	-0.862237	5.98488	1.73114e-06	3.41503e-05
chr1:175137976:175139949	chr1	175137976	175139949	1974	-1.59372	4.31543	1.73705e-06	3.42368e-05
chr12:76244273:76246366	chr12	76244273	76246366	2094	-1.54913	4.31436	1.76527e-06	3.46589e-05
chr4:168991869:168993294	chr4	168991869	168993294	1426	-1.75957	4.10702	1.82942e-06	3.58682e-05
chr13:113446226:113446940	chr13	113446226	113446940	715	-2.25664	3.46357	1.85235e-06	3.6286e-05
chr3:51930788:51932851	chr3	51930788	51932851	2064	-1.39318	4.41973	1.90724e-06	3.7231e-05
chr3:111627584:111657401	chr3	111627584	111657401	29818	-0.68342	10.5444	1.93432e-06	3.76279e-05
chr5:92898687:92902188	chr5	92898687	92902188	3502	-0.840811	6.55065	1.95844e-06	3.80318e-05
chr10:32185476:32186888	chr10	32185476	32186888	1413	-1.52612	4.48626	1.96108e-06	3.805e-05
chr17:62804349:62805398	chr17	62804349	62805398	1050	-1.42069	4.46072	1.98438e-06	3.84356e-05
chr16:31891652:31892205	chr16	31891652	31892205	554	-3.30002	2.52749	1.99853e-06	3.86428e-05
chr16:4968490:4969302	chr16	4968490	4969302	813	-2.62607	3.07203	2.01454e-06	3.88853e-05
chr11:111911439:111914384	chr11	111911439	111914384	2946	-0.809185	6.27109	2.05508e-06	3.95656e-05
chr16:30751292:30753698	chr16	30751292	30753698	2407	-0.952162	5.93823	2.09956e-06	4.02835e-05
chr16:85032154:85033739	chr16	85032154	85033739	1586	-1.56452	4.27278	2.13986e-06	4.08817e-05
chr4:169489589:169492667	chr4	169489589	169492667	3079	-0.884043	5.86586	2.17354e-06	4.13841e-05
chr2:110361731:110372496	chr2	110361731	110372496	10766	-0.638606	8.44252	2.34642e-06	4.43367e-05
chr17:46012959:46014395	chr17	46012959	46014395	1437	-1.26268	4.84862	2.3513e-06	4.43914e-05
chr19:50116213:50118154	chr19	50116213	50118154	1942	-1.35815	4.79765	2.36971e-06	4.45523e-05
chr14:93725111:93725895	chr14	93725111	93725895	785	-2.21714	3.3343	2.40192e-06	4.49308e-05
chr6:83007712:83008474	chr6	83007712	83008474	763	-2.77982	2.76437	2.50835e-06	4.68825e-05
chr2:224678034:224682901	chr2	224678034	224682901	4868	-0.677103	7.26407	2.5773e-06	4.8051e-05
chr5:92524730:92526092	chr5	92524730	92526092	1363	-1.07394	5.17325	2.59535e-06	4.83072e-05
chr10:91110866:91112524	chr10	91110866	91112524	1659	-1.6775	3.96091	2.60764e-06	4.84956e-05
chr1:94781432:94784139	chr1	94781432	94784139	2708	-1.20886	4.97386	2.6549e-06	4.93336e-05
chr14:61822174:61823390	chr14	61822174	61823390	1217	-1.32271	4.50872	2.6966e-06	5.00613e-05
chr14:93509326:93512326	chr14	93509326	93512326	3001	-0.927106	5.75716	2.70721e-06	5.01807e-05
chr7:150812636:150813890	chr7	150812636	150813890	1255	-1.24492	4.71112	2.76286e-06	5.10856e-05
chr6:143265310:143269171	chr6	143265310	143269171	3862	-1.10593	5.3916	2.78522e-06	5.14566e-05
chr2:46170104:46172021	chr2	46170104	46172021	1918	-1.10696	5.16622	2.79553e-06	5.16044e-05
chr12:66158508:66160154	chr12	66158508	66160154	1647	-1.13273	5.10593	2.84308e-06	5.231e-05
chr2:227636666:227638888	chr2	227636666	227638888	2223	-1.07265	5.37901	2.87323e-06	5.27346e-05
chr8:62633478:62635528	chr8	62633478	62635528	2051	-1.49248	4.64881	3.00444e-06	5.47395e-05
chr2:234326398:234329372	chr2	234326398	234329372	2975	-0.889848	5.79738	3.1724e-06	5.7519e-05
chr1:193026951:193030383	chr1	193026951	193030383	3433	-0.754916	6.7918	3.19837e-06	5.78348e-05
chr8:126202936:126206535	chr8	126202936	126206535	3600	-0.754753	6.85964	3.32814e-06	6.00029e-05
chr16:69450829:69452547	chr16	69450829	69452547	1719	-0.946425	5.74446	3.35487e-06	6.04362e-05
chr7:130523160:130525069	chr7	130523160	130525069	1910	-1.21292	4.81099	3.46628e-06	6.2293e-05
chr4:33370840:33371522	chr4	33370840	33371522	683	-2.60911	2.93107	3.53562e-06	6.34224e-05
chr12:76424732:76427475	chr12	76424732	76427475	2744	-0.903818	5.64611	3.6335e-06	6.49335e-05
chr2:85280265:85281546	chr2	85280265	85281546	1282	-1.44404	4.19051	3.69883e-06	6.57864e-05
chr1:213296642:213297919	chr1	213296642	213297919	1278	-1.43211	4.31703	3.73263e-06	6.63348e-05
chr14:31634396:31635941	chr14	31634396	31635941	1546	-1.25846	4.78281	3.76352e-06	6.67778e-05
chr19:12404158:12405993	chr19	12404158	12405993	1836	-1.51542	4.21855	3.76108e-06	6.67778e-05
chr9:127572597:127573959	chr9	127572597	127573959	1363	-0.999349	5.44151	3.77868e-06	6.69408e-05
chr17:43017313:43020027	chr17	43017313	43020027	2715	-1.13569	4.96674	3.78435e-06	6.69883e-05
chr5:14185542:14186541	chr5	14185542	14186541	1000	-1.44028	4.4073	3.87495e-06	6.8484e-05
chr2:220317347:220319182	chr2	220317347	220319182	1836	-1.13592	5.13954	3.89614e-06	6.88042e-05
chr17:65436588:65438109	chr17	65436588	65438109	1522	-1.28217	4.76731	3.92308e-06	6.92254e-05
chr6:56557744:56559410	chr6	56557744	56559410	1667	-1.53124	4.19131	3.92962e-06	6.92862e-05
chr4:95444673:95445462	chr4	95444673	95445462	790	-2.85024	3.10835	3.93366e-06	6.93029e-05
chr7:150810082:150811890	chr7	150810082	150811890	1809	-1.24596	4.83868	3.95772e-06	6.9672e-05
chr16:74513936:74515630	chr16	74513936	74515630	1695	-1.11328	5.01593	4.01547e-06	7.05777e-05
chr1:66780298:66783574	chr1	66780298	66783574	3277	-0.911553	5.9156	4.04791e-06	7.10922e-05
chr8:126122637:126124789	chr8	126122637	126124789	2153	-0.960819	5.65002	4.07172e-06	7.14543e-05
chr15:70389069:70392098	chr15	70389069	70392098	3030	-0.896944	5.86876	4.13979e-06	7.25353e-05
chr14:74206870:74210572	chr14	74206870	74210572	3703	-0.897278	5.65358	4.1603e-06	7.27241e-05
chr2:9747971:9748857	chr2	9747971	9748857	887	-1.75331	3.72639	4.40198e-06	7.66498e-05
chr6:76458045:76461418	chr6	76458045	76461418	3374	-1.02745	5.40172	4.45e-06	7.73659e-05
chr2:234330623:234331312	chr2	234330623	234331312	690	-2.12935	3.4306	4.47749e-06	7.77231e-05
chr1:68214150:68216411	chr1	68214150	68216411	2262	-0.871386	5.7586	4.56414e-06	7.89825e-05
chr9:40287538:40288385	chr9	40287538	40288385	848	-3.33006	2.55199	4.57978e-06	7.9131e-05
chr2:10469933:10471743	chr2	10469933	10471743	1811	-1.69922	3.9017	4.61211e-06	7.96282e-05
chr1:198188739:198190013	chr1	198188739	198190013	1275	-1.64174	3.86682	4.65398e-06	8.02275e-05
chr2:200296019:200297613	chr2	200296019	200297613	1595	-1.32298	4.63199	4.75889e-06	8.16591e-05
chr9:5620438:5622743	chr9	5620438	5622743	2306	-1.15371	4.81719	4.95032e-06	8.462e-05
chr6:42066767:42069731	chr6	42066767	42069731	2965	-0.893844	5.69458	4.97172e-06	8.47271e-05
chr16:70509624:70511039	chr16	70509624	70511039	1416	-1.368	4.30258	5.21551e-06	8.87468e-05
chr19:4565016:4565698	chr19	4565016	4565698	683	-2.08938	3.32931	5.37804e-06	9.10286e-05
chr10:28366567:28368210	chr10	28366567	28368210	1644	-1.32925	4.62244	5.39912e-06	9.13164e-05
chr19:1414959:1415968	chr19	1414959	1415968	1010	-1.79321	3.81364	5.41231e-06	9.14706e-05
chr13:22016133:22018110	chr13	22016133	22018110	1978	-1.30998	4.75241	5.49481e-06	9.27948e-05
chr21:35055131:35056277	chr21	35055131	35056277	1147	-1.95469	3.5519	5.88078e-06	9.90144e-05
chr1:8225524:8228647	chr1	8225524	8228647	3124	-0.861839	6.37034	5.89848e-06	9.9238e-05
chr2:110906223:110908605	chr2	110906223	110908605	2383	-0.82834	6.03255	5.98035e-06	0.00010049
chr7:114541011:114542840	chr7	114541011	114542840	1830	-1.54101	4.0179	6.008e-06	0.000100816
chr7:98990381:98991318	chr7	98990381	98991318	938	-2.63537	2.8181	6.04469e-06	0.000101317
chr12:93321680:93324229	chr12	93321680	93324229	2550	-1.03424	5.17743	6.18884e-06	0.000103501
chr17:80325474:80326299	chr17	80325474	80326299	826	-1.29894	4.53815	6.19459e-06	0.00010352
chr2:8767385:8769815	chr2	8767385	8769815	2431	-0.882725	5.67408	6.35954e-06	0.000105882
chr2:102374949:102375964	chr2	102374949	102375964	1016	-1.33785	4.28423	6.57631e-06	0.000109248
chr14:64904147:64905992	chr14	64904147	64905992	1846	-1.1391	4.81272	6.60468e-06	0.000109557
chr1:219755473:219757113	chr1	219755473	219757113	1641	-1.92962	3.55457	6.69117e-06	0.000110827
chr20:34471173:34472784	chr20	34471173	34472784	1612	-1.17049	5.14842	6.81034e-06	0.000112634
chr19:5172607:5173861	chr19	5172607	5173861	1255	-1.31645	4.39736	6.86836e-06	0.000113208
chr7:77463525:77464552	chr7	77463525	77464552	1028	-1.85469	3.49293	7.03658e-06	0.00011577
chr2:70555767:70557922	chr2	70555767	70557922	2156	-1.05418	5.19556	7.15097e-06	0.000117402
chr11:71647701:71648293	chr11	71647701	71648293	593	-2.83578	2.80628	7.20609e-06	0.00011822
chr10:81955220:81957700	chr10	81955220	81957700	2481	-0.791543	6.18514	7.44057e-06	0.000121533
chr12:110388837:110390000	chr12	110388837	110390000	1164	-1.69112	3.81283	7.77058e-06	0.000126279
chr7:157724901:157726736	chr7	157724901	157726736	1836	-1.19086	4.60022	7.89185e-06	0.000128157
chr4:10528039:10529712	chr4	10528039	10529712	1674	-1.26284	4.57141	8.09657e-06	0.000131386
chr3:141678457:141679475	chr3	141678457	141679475	1019	-1.38929	4.17899	8.14309e-06	0.000131855
chr1:198412011:198413416	chr1	198412011	198413416	1406	-1.22577	4.72548	8.15016e-06	0.000131874
chr7:101739469:101741864	chr7	101739469	101741864	2396	-1.09032	5.06724	8.23872e-06	0.000133019
chr11:110227318:110228903	chr11	110227318	110228903	1586	-1.07424	4.98866	8.32206e-06	0.000134171
chr1:21409505:21410655	chr1	21409505	21410655	1151	-1.97574	3.32541	8.35323e-06	0.000134576
chr10:82269203:82270139	chr10	82269203	82270139	937	-1.68036	4.12318	8.4899e-06	0.000136582
chr15:36661988:36667559	chr15	36661988	36667559	5572	-0.785947	6.46298	8.58958e-06	0.000137641
chr7:130671479:130672554	chr7	130671479	130672554	1076	-1.23795	4.82185	8.60385e-06	0.000137641
chr5:150168361:150170584	chr5	150168361	150170584	2224	-0.891942	5.56041	8.933e-06	0.000142686
chr17:76194426:76195542	chr17	76194426	76195542	1117	-1.25991	4.56834	8.94216e-06	0.000142731
chr8:38650266:38651108	chr8	38650266	38651108	843	-1.7999	3.50608	9.05936e-06	0.000144396
chr11:120436010:120438159	chr11	120436010	120438159	2150	-0.865594	5.68364	9.14417e-06	0.000145644
chr2:182640925:182657833	chr2	182640925	182657833	16909	-0.633445	9.76794	9.19663e-06	0.000146375
chr17:73152445:73153359	chr17	73152445	73153359	915	-1.79739	3.65475	9.21979e-06	0.00014664
chrX:71904905:71906361	chrX	71904905	71906361	1457	-1.83284	3.53819	9.32868e-06	0.000148161
chr19:17796967:17798910	chr19	17796967	17798910	1944	-1.31347	4.42211	9.34938e-06	0.000148385
chr12:76302488:76303627	chr12	76302488	76303627	1140	-1.43244	4.06701	9.38347e-06	0.000148715
chr10:82256415:82259543	chr10	82256415	82259543	3129	-0.778075	5.93829	9.70925e-06	0.000153444
chr19:53868943:53869714	chr19	53868943	53869714	772	-1.84256	3.42031	9.81221e-06	0.000154853
chr8:42349007:42351771	chr8	42349007	42351771	2765	-0.79273	6.02951	9.97409e-06	0.000157187
chr2:158117168:158118257	chr2	158117168	158118257	1090	-1.40415	4.19304	1.01995e-05	0.000160175
chr12:104669752:104676290	chr12	104669752	104676290	6539	-0.634329	7.10308	1.04854e-05	0.00016432
chr12:27484059:27486786	chr12	27484059	27486786	2728	-1.32655	4.39102	1.05306e-05	0.000164779
chr19:956597:957761	chr19	956597	957761	1165	-1.62081	3.77353	1.06004e-05	0.000165543
chr19:36672943:36674399	chr19	36672943	36674399	1457	-1.49909	4.04447	1.06335e-05	0.00016583
chr19:17190807:17191348	chr19	17190807	17191348	542	-2.67586	2.96852	1.09229e-05	0.000169869
chr1:203857309:203859405	chr1	203857309	203859405	2097	-0.7788	6.20242	1.10166e-05	0.000171089
chr8:82105688:82106932	chr8	82105688	82106932	1245	-1.51308	4.00228	1.13679e-05	0.000175936
chr8:27493078:27494206	chr8	27493078	27494206	1129	-1.53477	3.85973	1.15385e-05	0.000178083
chr17:19139312:19141860	chr17	19139312	19141860	2549	-0.961571	5.29672	1.15592e-05	0.000178159
chr12:1224846:1225696	chr12	1224846	1225696	851	-2.6408	3.05862	1.18533e-05	0.00018219
chr22:36724503:36730119	chr22	36724503	36730119	5617	-0.874601	6.51869	1.18954e-05	0.000182711
chr8:30388488:30390446	chr8	30388488	30390446	1959	-1.16081	5.00506	1.23177e-05	0.000188681
chr1:16501747:16503568	chr1	16501747	16503568	1822	-0.926199	5.34498	1.24787e-05	0.000190756
chr1:29298090:29299875	chr1	29298090	29299875	1786	-1.30203	4.76105	1.24957e-05	0.000190833
chr10:28434269:28436178	chr10	28434269	28436178	1910	-1.04572	5.07515	1.26191e-05	0.000192508
chr5:139600911:139602562	chr5	139600911	139602562	1652	-1.2245	4.78544	1.26773e-05	0.000193133
chr9:101543567:101545192	chr9	101543567	101545192	1626	-1.18633	5.05175	1.26732e-05	0.000193133
chrX:45647925:45650136	chrX	45647925	45650136	2212	-1.34312	4.25758	1.28211e-05	0.000194927
chr16:68691067:68694740	chr16	68691067	68694740	3674	-0.84084	5.93736	1.29024e-05	0.000195896
chr8:71016762:71018086	chr8	71016762	71018086	1325	-1.61324	3.83352	1.30024e-05	0.000197039
chrX:84499097:84500275	chrX	84499097	84500275	1179	-2.05724	3.22436	1.30041e-05	0.000197039
chr9:132268286:132269716	chr9	132268286	132269716	1431	-1.5066	4.54724	1.31187e-05	0.000198374
chr21:38570558:38572636	chr21	38570558	38572636	2079	-1.11294	4.93265	1.33665e-05	0.000201713
chr9:21871471:21874509	chr9	21871471	21874509	3039	-0.84096	5.76957	1.339e-05	0.000201931
chr4:6999707:7001790	chr4	6999707	7001790	2084	-1.26754	4.80895	1.38227e-05	0.000207897
chr1:201975343:201980523	chr1	201975343	201980523	5181	-0.654894	6.76748	1.4161e-05	0.0002127
chr9:74753312:74756656	chr9	74753312	74756656	3345	-0.712187	6.35513	1.44299e-05	0.000216159
chr4:30801821:30806957	chr4	30801821	30806957	5137	-0.612239	7.68564	1.46026e-05	0.000218454
chr2:182740158:182742949	chr2	182740158	182742949	2792	-0.841339	6.39435	1.46323e-05	0.000218607
chr2:101729370:101731969	chr2	101729370	101731969	2600	-0.8644	5.69976	1.49901e-05	0.000223803
chr1:168361074:168362556	chr1	168361074	168362556	1483	-1.13201	4.64121	1.5201e-05	0.000226649
chr19:38145352:38146505	chr19	38145352	38146505	1154	-2.72094	2.54936	1.52982e-05	0.000227947
chr8:143315982:143317656	chr8	143315982	143317656	1675	-1.2534	4.448	1.54175e-05	0.00022942
chr13:73544687:73545264	chr13	73544687	73545264	578	-2.13133	3.02268	1.54682e-05	0.000229869
chr18:12656524:12658668	chr18	12656524	12658668	2145	-1.43135	4.31483	1.55108e-05	0.000230349
chr3:10018102:10019208	chr3	10018102	10019208	1107	-1.46936	4.03542	1.56796e-05	0.00023224
chr19:6730383:6730964	chr19	6730383	6730964	582	-2.04472	3.22004	1.58313e-05	0.000234178
chr1:225695658:225698148	chr1	225695658	225698148	2491	-0.865323	5.7798	1.58957e-05	0.00023482
chr2:70768468:70769719	chr2	70768468	70769719	1252	-1.57165	3.7351	1.61165e-05	0.000237769
chr4:125562788:125563977	chr4	125562788	125563977	1190	-1.28257	4.33844	1.65562e-05	0.000243455
chr17:74025361:74026161	chr17	74025361	74026161	801	-1.53827	3.74725	1.6586e-05	0.000243573
chr2:161990357:161995516	chr2	161990357	161995516	5160	-0.785167	6.94147	1.70373e-05	0.000249709
chr22:38043884:38044479	chr22	38043884	38044479	596	-1.81048	3.50828	1.70661e-05	0.000249968
chr2:230918389:230919927	chr2	230918389	230919927	1539	-1.32405	4.30355	1.75061e-05	0.000255745
chr17:18991725:18994947	chr17	18991725	18994947	3223	-0.887014	5.62507	1.754e-05	0.000256072
chr9:97783218:97788824	chr9	97783218	97788824	5607	-0.681119	6.75183	1.77627e-05	0.00025865
chr11:48001210:48003880	chr11	48001210	48003880	2671	-1.09492	4.70164	1.80233e-05	0.000261425
chr8:134306187:134307115	chr8	134306187	134307115	929	-1.41911	4.06144	1.81043e-05	0.000262261
chr12:10571751:10579204	chr12	10571751	10579204	7454	-0.620652	7.08652	1.85625e-05	0.000268378
chr19:4057547:4062047	chr19	4057547	4062047	4501	-0.98336	5.21005	1.89165e-05	0.000273144
chr16:14402841:14404251	chr16	14402841	14404251	1411	-1.41846	3.99272	1.89656e-05	0.000273676
chr5:115366955:115368806	chr5	115366955	115368806	1852	-0.795226	5.74949	1.90233e-05	0.000274332
chr3:12485600:12487530	chr3	12485600	12487530	1931	-1.07343	4.92	1.91799e-05	0.000275881
chr18:57621054:57622946	chr18	57621054	57622946	1893	-0.935969	5.36329	1.92163e-05	0.000276226
chr15:75493488:75496027	chr15	75493488	75496027	2540	-0.875915	5.50632	1.93853e-05	0.000278477
chr12:10546543:10550787	chr12	10546543	10550787	4245	-0.664817	6.49917	1.9407e-05	0.000278509
chr7:100804965:100806353	chr7	100804965	100806353	1389	-1.17798	4.49631	1.94369e-05	0.000278682
chr7:116414683:116418613	chr7	116414683	116418613	3931	-0.609886	7.16326	1.96505e-05	0.000281386
chr19:21511406:21512424	chr19	21511406	21512424	1019	-1.47228	3.92075	1.9701e-05	0.000281929
chr6:1630281:1631779	chr6	1630281	1631779	1499	-1.56307	3.87927	1.9855e-05	0.000283588
chr20:48315519:48318939	chr20	48315519	48318939	3421	-0.680496	6.57514	2.04435e-05	0.000290329
chr14:31663283:31667174	chr14	31663283	31667174	3892	-0.746185	6.39306	2.05391e-05	0.000291317
chr10:76052788:76054585	chr10	76052788	76054585	1798	-1.22633	4.7951	2.06051e-05	0.000291884
chr10:126564259:126564708	chr10	126564259	126564708	450	-2.04303	3.1394	2.06515e-05	0.000292172
chr5:176620611:176622424	chr5	176620611	176622424	1814	-1.10332	5.12612	2.0983e-05	0.000295927
chr11:110122358:110123935	chr11	110122358	110123935	1578	-0.950748	5.26877	2.12861e-05	0.000299825
chr10:92607192:92608291	chr10	92607192	92608291	1100	-1.77181	3.65352	2.14912e-05	0.000302334
chr12:127536791:127538434	chr12	127536791	127538434	1644	-0.899408	5.5861	2.16622e-05	0.000304548
chr17:61512457:61513591	chr17	61512457	61513591	1135	-1.2763	4.19118	2.16775e-05	0.000304573
chr8:98843201:98844326	chr8	98843201	98844326	1126	-1.41366	4.13705	2.2496e-05	0.000314888
chr5:102245016:102249044	chr5	102245016	102249044	4029	-0.685184	6.63307	2.26131e-05	0.000316132
chr2:182634849:182635772	chr2	182634849	182635772	924	-1.50239	3.84605	2.28099e-05	0.000318684
chr5:142224959:142226319	chr5	142224959	142226319	1361	-1.47595	3.8293	2.29704e-05	0.000320727
chr7:24944926:24948446	chr7	24944926	24948446	3521	-0.754319	6.22274	2.31576e-05	0.000322738
chr16:68963782:68964574	chr16	68963782	68964574	793	-2.09805	3.10065	2.343e-05	0.000325925
chr13:107218904:107221189	chr13	107218904	107221189	2286	-0.958199	5.55396	2.35292e-05	0.000327103
chr4:75283698:75284476	chr4	75283698	75284476	779	-1.87924	3.31119	2.3583e-05	0.000327326
chr8:8880266:8880819	chr8	8880266	8880819	554	-2.13474	3.02164	2.35615e-05	0.000327326
chr7:5588568:5589469	chr7	5588568	5589469	902	-1.30772	4.35045	2.41263e-05	0.000334159
chr9:124369919:124370844	chr9	124369919	124370844	926	-1.99203	3.25523	2.44482e-05	0.000337575
chr6:43088445:43089614	chr6	43088445	43089614	1170	-1.20964	4.41264	2.45012e-05	0.000338098
chr21:45147481:45148978	chr21	45147481	45148978	1498	-1.38386	3.9979	2.48777e-05	0.000342872
chr19:47415929:47417301	chr19	47415929	47417301	1373	-1.39128	3.98174	2.51969e-05	0.000347057
chr19:6087102:6088765	chr19	6087102	6088765	1664	-1.0937	4.70623	2.52507e-05	0.000347158
chr6:56792366:56793492	chr6	56792366	56793492	1127	-1.68208	3.6786	2.52254e-05	0.000347158
chr19:33538041:33539466	chr19	33538041	33539466	1426	-0.919265	5.19748	2.54925e-05	0.000349839
chr4:11429224:11432372	chr4	11429224	11432372	3149	-0.869806	5.80155	2.55824e-05	0.000350643
chr5:41924743:41926536	chr5	41924743	41926536	1794	-0.82755	5.47387	2.58823e-05	0.000354537
chr12:65001468:65006241	chr12	65001468	65006241	4774	-0.678545	6.42919	2.60422e-05	0.000356509
chr3:185275950:185277064	chr3	185275950	185277064	1115	-1.12832	4.48051	2.63847e-05	0.000360977
chr1:150953486:150954854	chr1	150953486	150954854	1369	-1.21732	4.38693	2.64376e-05	0.000361481
chr19:46806252:46807673	chr19	46806252	46807673	1422	-1.20606	4.36052	2.64926e-05	0.000362012
chr5:92434910:92437606	chr5	92434910	92437606	2697	-0.893064	5.39343	2.65533e-05	0.000362399
chr1:21475108:21477805	chr1	21475108	21477805	2698	-0.832708	5.6036	2.67723e-05	0.000364944
chr17:75469549:75470480	chr17	75469549	75470480	932	-1.44441	3.8407	2.69674e-05	0.000367379
chr17:80821526:80822608	chr17	80821526	80822608	1083	-1.38333	3.99763	2.7147e-05	0.000369602
chr3:129381309:129382680	chr3	129381309	129382680	1372	-0.946803	5.16061	2.72751e-05	0.000370895
chr19:869128:869818	chr19	869128	869818	691	-1.71418	3.44528	2.82072e-05	0.000381717
chr5:141811915:141813783	chr5	141811915	141813783	1869	-1.26063	4.25177	2.89271e-05	0.000391008
chr19:49520441:49523037	chr19	49520441	49523037	2597	-0.846558	5.51759	2.92824e-05	0.000395312
chr8:141319106:141320786	chr8	141319106	141320786	1681	-1.02185	4.94178	2.96741e-05	0.000399877
chr12:53386482:53387693	chr12	53386482	53387693	1212	-1.28026	4.24361	2.98701e-05	0.000402277
chr10:28580403:28581456	chr10	28580403	28581456	1054	-1.22305	4.36012	3.02211e-05	0.000406271
chr19:19723893:19724891	chr19	19723893	19724891	999	-1.32496	4.09024	3.03944e-05	0.000408062
chr22:23624063:23625007	chr22	23624063	23625007	945	-1.58578	3.56292	3.04089e-05	0.000408062
chr7:144080934:144082638	chr7	144080934	144082638	1705	-1.08018	4.65068	3.06928e-05	0.000411378
chr11:48010672:48015455	chr11	48010672	48015455	4784	-0.662038	6.72869	3.12556e-05	0.000418005
chr9:126840088:126841199	chr9	126840088	126841199	1112	-1.45256	3.90566	3.12779e-05	0.000418005
chr3:182970763:182973253	chr3	182970763	182973253	2491	-0.958474	5.16599	3.20504e-05	0.000426282
chr10:90639448:90643582	chr10	90639448	90643582	4135	-0.642817	6.67527	3.21036e-05	0.000426714
chr1:212464265:212465157	chr1	212464265	212465157	893	-1.34684	4.03228	3.24278e-05	0.000430514
chr6:158463023:158463980	chr6	158463023	158463980	958	-1.27488	4.1051	3.31471e-05	0.000438505
chr13:74002060:74004807	chr13	74002060	74004807	2748	-0.939555	5.13564	3.32628e-05	0.000439776
chr16:87979103:87979739	chr16	87979103	87979739	637	-1.28173	4.36206	3.35202e-05	0.000442872
chr4:11721666:11722253	chr4	11721666	11722253	588	-2.05379	3.05784	3.35365e-05	0.000442872
chr12:6539200:6540948	chr12	6539200	6540948	1749	-0.821554	5.58843	3.3589e-05	0.000443304
chr9:99437054:99438013	chr9	99437054	99438013	960	-1.29358	4.42425	3.39976e-05	0.000447642
chr14:93706583:93707257	chr14	93706583	93707257	675	-2.32943	2.9432	3.40766e-05	0.000448155
chr1:151484879:151487323	chr1	151484879	151487323	2445	-0.861026	5.357	3.41937e-05	0.000449431
chr19:17560718:17561984	chr19	17560718	17561984	1267	-1.39106	4.15752	3.5876e-05	0.000469383
chr20:50246987:50248555	chr20	50246987	50248555	1569	-0.897232	5.41113	3.59225e-05	0.000469383
chr17:19117880:19121165	chr17	19117880	19121165	3286	-0.823056	5.584	3.64624e-05	0.000475072
chr4:99545602:99549545	chr4	99545602	99549545	3944	-0.764431	6.25722	3.71208e-05	0.000482398
chr16:30210271:30211697	chr16	30210271	30211697	1427	-1.1508	4.39175	3.76782e-05	0.000488922
chr10:134220491:134221861	chr10	134220491	134221861	1371	-1.41963	3.82647	3.80953e-05	0.000493478
chr13:73631408:73635677	chr13	73631408	73635677	4270	-1.14368	5.30403	3.85802e-05	0.000498904
chr17:43199056:43202635	chr17	43199056	43202635	3580	-0.736944	6.3596	3.8636e-05	0.000499327
chr1:110545794:110547339	chr1	110545794	110547339	1546	-0.87581	5.44201	3.88669e-05	0.000501732
chr3:53924836:53926758	chr3	53924836	53926758	1923	-0.772468	5.8699	3.92196e-05	0.000505703
chr17:42890611:42892511	chr17	42890611	42892511	1901	-1.01912	4.92686	4.02552e-05	0.000517567
chr19:19488030:19489831	chr19	19488030	19489831	1802	-1.11015	4.6107	4.13239e-05	0.000530395
chr17:40476856:40478402	chr17	40476856	40478402	1547	-1.39373	4.06711	4.15667e-05	0.000533206
chr9:97580295:97581020	chr9	97580295	97581020	726	-1.77825	3.24542	4.17059e-05	0.000534684
chr17:79870609:79871080	chr17	79870609	79871080	472	-1.89191	3.1149	4.20555e-05	0.00053855
chr6:20266806:20267963	chr6	20266806	20267963	1158	-1.15015	4.39545	4.2244e-05	0.000540655
chr10:99648128:99649887	chr10	99648128	99649887	1760	-1.2041	4.44267	4.34829e-05	0.000555877
chr6:152701402:152703170	chr6	152701402	152703170	1769	-1.46939	3.85814	4.35305e-05	0.000556168
chr15:41061469:41062555	chr15	41061469	41062555	1087	-2.00912	3.02964	4.35681e-05	0.000556332
chr11:68775633:68778925	chr11	68775633	68778925	3293	-0.965164	4.94237	4.40255e-05	0.000561852
chr12:49880942:49882099	chr12	49880942	49882099	1158	-1.76341	3.4796	4.41258e-05	0.000562811
chr12:50594885:50597359	chr12	50594885	50597359	2475	-0.693778	6.22425	4.42553e-05	0.000564142
chr4:186225824:186229214	chr4	186225824	186229214	3391	-1.05386	4.81698	4.45303e-05	0.00056723
chr19:53140997:53141752	chr19	53140997	53141752	756	-2.12711	3.00669	4.4728e-05	0.000569197
chr17:70584396:70586085	chr17	70584396	70586085	1690	-0.790818	5.60383	4.50449e-05	0.000572578
chr7:101706877:101708122	chr7	101706877	101708122	1246	-1.19154	4.23161	4.57019e-05	0.000579551
chr3:141806515:141808042	chr3	141806515	141808042	1528	-1.23279	4.20629	4.66456e-05	0.000588917
chr3:42102953:42106152	chr3	42102953	42106152	3200	-0.755479	5.7856	4.68922e-05	0.000591364
chr3:72201686:72202663	chr3	72201686	72202663	978	-1.78677	3.25608	4.70193e-05	0.000592633
chr8:38889325:38890859	chr8	38889325	38890859	1535	-0.874775	5.17941	4.71848e-05	0.000594386
chr5:72326259:72327436	chr5	72326259	72327436	1178	-1.12684	4.40011	4.77958e-05	0.000600395
chr12:29300814:29302405	chr12	29300814	29302405	1592	-1.26375	4.32898	4.80554e-05	0.000603318
chrX:45665309:45670907	chrX	45665309	45670907	5599	-0.660436	6.29015	4.81975e-05	0.000604762
chr11:107432903:107436764	chr11	107432903	107436764	3862	-0.674081	6.42108	4.92089e-05	0.000617108
chr18:68082722:68084042	chr18	68082722	68084042	1321	-1.08029	4.59806	4.977e-05	0.000623447
chr17:43270704:43271276	chr17	43270704	43271276	573	-2.79896	2.40639	5.04323e-05	0.000631037
chr6:43463479:43464819	chr6	43463479	43464819	1341	-1.47942	3.86882	5.05898e-05	0.000632582
chr22:50627963:50629930	chr22	50627963	50629930	1968	-0.77447	5.65628	5.1882e-05	0.000647369
chr5:115274381:115277403	chr5	115274381	115277403	3023	-0.871518	5.35417	5.23855e-05	0.0006522
chr16:88520063:88523179	chr16	88520063	88523179	3117	-0.730305	6.10061	5.26081e-05	0.000654607
chr3:111393180:111396013	chr3	111393180	111396013	2834	-1.07971	4.6094	5.49313e-05	0.00067974
chr6:153487229:153489729	chr6	153487229	153489729	2501	-0.72612	5.91104	5.51108e-05	0.000681585
chr16:67438381:67439358	chr16	67438381	67439358	978	-1.09861	4.4417	5.5203e-05	0.000682349
chr3:32354146:32356118	chr3	32354146	32356118	1973	-0.918441	5.15678	5.53097e-05	0.000683291
chr1:35244560:35249923	chr1	35244560	35249923	5364	-0.639166	6.68147	5.56733e-05	0.000687405
chr19:10687631:10688187	chr19	10687631	10688187	557	-2.35197	2.60138	5.57227e-05	0.000687635
chr7:107589565:107590512	chr7	107589565	107590512	948	-1.99991	3.09896	5.62614e-05	0.000692757
chr14:57725892:57726743	chr14	57725892	57726743	852	-1.39746	3.88237	5.64924e-05	0.000694838
chr6:159069537:159071209	chr6	159069537	159071209	1673	-0.959778	5.21317	5.66417e-05	0.000696293
chr2:238395774:238399170	chr2	238395774	238399170	3397	-0.823246	5.39908	5.6971e-05	0.000698558
chr21:41004417:41007233	chr21	41004417	41007233	2817	-1.06925	4.74271	5.70925e-05	0.000699149
chr10:32153488:32154372	chr10	32153488	32154372	885	-1.59172	3.50712	5.72412e-05	0.000700588
chr8:38322478:38324105	chr8	38322478	38324105	1628	-1.34232	4.14019	5.72792e-05	0.00070067
chr5:103424455:103425766	chr5	103424455	103425766	1312	-1.28791	4.19456	5.7444e-05	0.000701833
chr13:114828948:114831804	chr13	114828948	114831804	2857	-0.711577	5.81936	5.78153e-05	0.000705303
chr8:142136799:142139232	chr8	142136799	142139232	2434	-0.651648	6.20086	5.96008e-05	0.000725111
chr22:50720239:50722005	chr22	50720239	50722005	1767	-1.01397	4.7415	6.07753e-05	0.000737451
chr6:16681311:16681990	chr6	16681311	16681990	680	-1.9431	2.98599	6.08746e-05	0.000737804
chr22:30697667:30698889	chr22	30697667	30698889	1223	-1.29731	3.99584	6.1239e-05	0.00073982
chr2:191513924:191515037	chr2	191513924	191515037	1114	-1.54849	3.52856	6.13478e-05	0.000739938
chr15:90954455:90958598	chr15	90954455	90958598	4144	-0.708789	6.25438	6.16692e-05	0.000742882
chr6:81148213:81150575	chr6	81148213	81150575	2363	-1.17701	4.586	6.16914e-05	0.000742882
chr11:65886741:65887571	chr11	65886741	65887571	831	-1.82723	3.21067	6.1956e-05	0.000744931
chr12:6744430:6745846	chr12	6744430	6745846	1417	-1.51247	3.55236	6.19612e-05	0.000744931
chr2:46917333:46918894	chr2	46917333	46918894	1562	-1.21337	4.31052	6.23529e-05	0.000748836
chr2:65609336:65611881	chr2	65609336	65611881	2546	-0.721456	5.79774	6.30531e-05	0.000755626
chr9:21835323:21836991	chr9	21835323	21836991	1669	-0.9761	5.06442	6.34931e-05	0.000760086
chr20:61334732:61337840	chr20	61334732	61337840	3109	-0.801105	5.53857	6.37329e-05	0.000762142
chr7:80127463:80129906	chr7	80127463	80129906	2444	-0.656233	6.1273	6.42231e-05	0.000766368
chr1:24434347:24436035	chr1	24434347	24436035	1689	-1.11673	4.43145	6.5299e-05	0.000777551
chr9:139433801:139434977	chr9	139433801	139434977	1177	-1.26063	4.16855	6.5605e-05	0.00078078
chr22:41016402:41016929	chr22	41016402	41016929	528	-1.98288	3.17071	6.57545e-05	0.000782144
chr16:18605911:18607045	chr16	18605911	18607045	1135	-1.27109	3.98784	6.60604e-05	0.000785365
chr1:231543600:231544340	chr1	231543600	231544340	741	-1.8766	3.01871	6.65109e-05	0.000789465
chr10:76262059:76263870	chr10	76262059	76263870	1812	-0.96433	4.82117	6.68152e-05	0.000792657
chr14:54306093:54308579	chr14	54306093	54308579	2487	-0.814434	5.59877	6.71488e-05	0.000796192
chr7:116062929:116064151	chr7	116062929	116064151	1223	-1.06383	4.54028	6.78267e-05	0.000802957
chrX:68369692:68371241	chrX	68369692	68371241	1550	-1.31024	4.31638	6.78078e-05	0.000802957
chr6:43090006:43091451	chr6	43090006	43091451	1446	-1.24124	3.99994	6.84875e-05	0.000809496
chr17:1690784:1691463	chr17	1690784	1691463	680	-1.79464	3.24145	6.90631e-05	0.000815439
chr2:75822573:75823714	chr2	75822573	75823714	1142	-1.36019	3.92084	7.02294e-05	0.000827466
chr6:150216271:150218982	chr6	150216271	150218982	2712	-0.780541	5.50731	7.02274e-05	0.000827466
chr6:8082651:8087337	chr6	8082651	8087337	4687	-0.613812	6.61426	7.06424e-05	0.000831895
chr17:73520758:73523588	chr17	73520758	73523588	2831	-0.817436	5.41746	7.26238e-05	0.00085433
chr8:37894027:37895373	chr8	37894027	37895373	1347	-1.15462	4.56655	7.29071e-05	0.00085685
chr3:111487087:111488104	chr3	111487087	111488104	1018	-1.73512	3.32682	7.39538e-05	0.000867244
chr15:41079244:41080705	chr15	41079244	41080705	1462	-0.789798	5.35501	7.45535e-05	0.000873203
chr2:85731781:85733153	chr2	85731781	85733153	1373	-1.38072	3.85987	7.45787e-05	0.000873203
chr20:48334389:48335303	chr20	48334389	48335303	915	-1.1282	4.6302	7.45292e-05	0.000873203
chr3:15671731:15673540	chr3	15671731	15673540	1810	-0.891647	5.08613	7.46359e-05	0.000873416
chr7:92274306:92276160	chr7	92274306	92276160	1855	-1.28098	4.09718	7.60078e-05	0.000887153
chr1:23514601:23516084	chr1	23514601	23516084	1484	-1.12903	4.34917	7.61047e-05	0.000887823
chr16:86697381:86699367	chr16	86697381	86699367	1987	-0.95372	4.94408	7.63432e-05	0.000890141
chr4:11457560:11458590	chr4	11457560	11458590	1031	-1.48661	3.62632	7.83375e-05	0.000911024
chr10:30345167:30347662	chr10	30345167	30347662	2496	-0.940483	5.03625	7.85925e-05	0.000913042
chr19:908597:910233	chr19	908597	910233	1637	-1.02181	4.55806	7.86958e-05	0.000913769
chr4:74088052:74089467	chr4	74088052	74089467	1416	-0.859179	5.30579	7.95452e-05	0.000923153
chr17:74091056:74091784	chr17	74091056	74091784	729	-1.8841	3.10472	7.9676e-05	0.000924192
chr17:70586577:70589281	chr17	70586577	70589281	2705	-0.817779	5.40676	7.99142e-05	0.000926475
chr1:246301588:246304332	chr1	246301588	246304332	2745	-0.76658	5.58857	8.01239e-05	0.000928426
chr1:3459275:3460589	chr1	3459275	3460589	1315	-1.21176	4.07056	8.10795e-05	0.000938044
chr1:94724158:94724978	chr1	94724158	94724978	821	-1.51543	3.70148	8.14098e-05	0.000940271
chr17:40760264:40762884	chr17	40760264	40762884	2621	-0.713939	5.71007	8.18885e-05	0.000944964
chr8:8897159:8898646	chr8	8897159	8898646	1488	-1.1592	4.26526	8.2106e-05	0.0009465
chr7:116138782:116142316	chr7	116138782	116142316	3535	-0.630363	6.51932	8.30135e-05	0.000956469
chr7:94536283:94538308	chr7	94536283	94538308	2026	-0.801027	5.31998	8.51568e-05	0.000977145
chr6:158460301:158462036	chr6	158460301	158462036	1736	-0.971485	4.90997	8.54184e-05	0.000979143
chr4:22501882:22503702	chr4	22501882	22503702	1821	-1.03379	4.61794	8.59964e-05	0.000985265
chr10:51045563:51046958	chr10	51045563	51046958	1396	-1.67551	3.24376	8.61532e-05	0.000986558
chr1:9359638:9361223	chr1	9359638	9361223	1586	-0.843223	5.17351	8.64929e-05	0.000989549
chr19:37178090:37179122	chr19	37178090	37179122	1033	-1.73992	3.28971	8.65028e-05	0.000989549
chr9:98272776:98274142	chr9	98272776	98274142	1367	-1.17824	4.24545	8.66915e-05	0.000991202
chr7:20379804:20381492	chr7	20379804	20381492	1689	-0.793469	5.32536	8.67683e-05	0.000991575
chr2:120009730:120011962	chr2	120009730	120011962	2233	-0.798468	5.45955	8.73578e-05	0.000996279
chr2:46186638:46192017	chr2	46186638	46192017	5380	-0.615889	6.67396	8.79434e-05	0.00100194
chr5:115261639:115269714	chr5	115261639	115269714	8076	-0.647994	7.99297	8.86866e-05	0.00100887
chr19:21949300:21950561	chr19	21949300	21950561	1262	-1.40619	3.72694	8.98741e-05	0.00102134
chr2:240240621:240241819	chr2	240240621	240241819	1199	-1.77821	3.18278	8.99217e-05	0.00102136
chr3:114377171:114380277	chr3	114377171	114380277	3107	-0.741204	5.50962	9.07431e-05	0.00103017
chr7:1606236:1611163	chr7	1606236	1611163	4928	-0.600288	6.42807	9.16756e-05	0.00104023
chr10:28418585:28419897	chr10	28418585	28419897	1313	-0.930772	4.99606	9.18163e-05	0.0010413
chr14:93767771:93768865	chr14	93767771	93768865	1095	-1.58549	3.5014	9.20832e-05	0.0010438
chr1:23703580:23704368	chr1	23703580	23704368	789	-1.5532	3.68325	9.41381e-05	0.00106506
chr22:40998994:40999798	chr22	40998994	40999798	805	-1.55212	3.43763	9.44753e-05	0.00106821
chr12:10491525:10493119	chr12	10491525	10493119	1595	-1.00995	4.53561	9.63456e-05	0.00108662
chr19:3054979:3057025	chr19	3054979	3057025	2047	-1.37727	3.83313	9.68411e-05	0.00109165
chr12:6337787:6338959	chr12	6337787	6338959	1173	-1.16598	4.12067	9.7235e-05	0.00109554
chr2:9520824:9522284	chr2	9520824	9522284	1461	-0.887867	4.94887	9.76085e-05	0.0010992
chr17:6771305:6772392	chr17	6771305	6772392	1088	-0.98883	4.57796	9.95209e-05	0.00111905
chr4:39638211:39641804	chr4	39638211	39641804	3594	-0.738656	6.06517	0.000100225	0.00112584
chr4:75310458:75311783	chr4	75310458	75311783	1326	-1.09319	4.33436	0.000103576	0.0011573
chr10:72393653:72394647	chr10	72393653	72394647	995	-1.66543	3.60423	0.00010546	0.00117683
chr8:141606571:141608778	chr8	141606571	141608778	2208	-1.21623	4.20102	0.0001055	0.00117683
chr9:111872422:111873653	chr9	111872422	111873653	1232	-1.33707	3.95993	0.000107336	0.00119434
chr12:76270245:76272867	chr12	76270245	76272867	2623	-0.722814	5.77078	0.0001075	0.00119498
chr9:70637187:70638584	chr9	70637187	70638584	1398	-1.21799	4.09101	0.000108035	0.00120033
chr4:75480215:75481436	chr4	75480215	75481436	1222	-1.09743	4.24829	0.000110094	0.00122139
chr17:53167177:53168172	chr17	53167177	53168172	996	-1.43135	3.82223	0.00011103	0.00123055
chr12:33044309:33045946	chr12	33044309	33045946	1638	-0.92161	4.84995	0.00011126	0.0012325
chr1:144518956:144521514	chr1	144518956	144521514	2559	-0.780079	5.52109	0.000112885	0.00124803
chr10:82218403:82221395	chr10	82218403	82221395	2993	-0.697348	5.82006	0.000113245	0.0012503
chr1:8553385:8554761	chr1	8553385	8554761	1377	-1.26067	4.20664	0.000113682	0.00125432
chr10:51059552:51060689	chr10	51059552	51060689	1138	-1.81778	3.05208	0.000113993	0.00125656
chr2:227567560:227568741	chr2	227567560	227568741	1182	-1.26772	4.26942	0.000114682	0.00126293
chr6:41545185:41547023	chr6	41545185	41547023	1839	-1.16173	4.35555	0.00011474	0.00126293
chr8:42358441:42362155	chr8	42358441	42362155	3715	-0.647356	6.04648	0.000114688	0.00126293
chr5:139640665:139641928	chr5	139640665	139641928	1264	-1.12143	4.75291	0.000115711	0.00127236
chr12:118708975:118710016	chr12	118708975	118710016	1042	-1.67688	3.55956	0.000116472	0.00127892
chr17:4230828:4231346	chr17	4230828	4231346	519	-1.78354	3.22983	0.000116903	0.00128233
chr8:126567706:126571316	chr8	126567706	126571316	3611	-0.620843	6.86436	0.000119321	0.00130693
chr5:102191731:102192930	chr5	102191731	102192930	1200	-1.19529	4.28479	0.000120152	0.00131475
chr4:30963343:30965743	chr4	30963343	30965743	2401	-0.660825	6.11463	0.000120224	0.0013149
chr17:72987212:72988894	chr17	72987212	72988894	1683	-1.26115	4.24796	0.000121618	0.00132755
chr6:86173082:86176348	chr6	86173082	86176348	3267	-0.672712	6.42021	0.00012175	0.00132835
chr2:9518386:9519268	chr2	9518386	9519268	883	-1.40983	3.71175	0.000121883	0.00132915
chr16:29470963:29471922	chr16	29470963	29471922	960	-1.05392	4.48005	0.000122137	0.00133018
chr3:53270005:53274112	chr3	53270005	53274112	4108	-0.823345	5.88225	0.000122472	0.00133124
chr6:17599954:17602387	chr6	17599954	17602387	2434	-0.870079	5.04491	0.00012249	0.00133124
chr5:95045921:95049478	chr5	95045921	95049478	3558	-0.646871	6.24871	0.000122686	0.00133207
chr16:89385031:89389713	chr16	89385031	89389713	4683	-0.610055	6.59535	0.000122948	0.00133427
chrX:130706317:130707077	chrX	130706317	130707077	761	-1.5635	3.44483	0.000123592	0.00133996
chr9:45449920:45451142	chr9	45449920	45451142	1223	-1.2735	3.85609	0.000124028	0.00134404
chr11:18006769:18008084	chr11	18006769	18008084	1316	-1.39394	3.71802	0.000124299	0.00134633
chr11:120187148:120187929	chr11	120187148	120187929	782	-2.21229	2.64712	0.000126712	0.0013684
chr13:114893819:114895300	chr13	114893819	114895300	1482	-0.997003	4.55022	0.00012675	0.0013684
chr6:49523669:49524656	chr6	49523669	49524656	988	-1.31083	4.12636	0.000126662	0.0013684
chr8:55065708:55066078	chr8	55065708	55066078	371	-1.91675	2.95664	0.000126765	0.0013684
chr1:52623514:52624750	chr1	52623514	52624750	1237	-1.53696	3.4852	0.000129696	0.00139533
chr2:145592288:145594746	chr2	145592288	145594746	2459	-0.971454	4.63699	0.000130473	0.00140235
chr1:21058332:21060958	chr1	21058332	21060958	2627	-0.699062	5.72933	0.000130562	0.00140263
chr3:111681803:111683000	chr3	111681803	111683000	1198	-1.07182	4.64834	0.000134648	0.00144032
chr10:124066556:124068734	chr10	124066556	124068734	2179	-0.615159	6.38322	0.000135323	0.00144615
chr17:69896616:69897618	chr17	69896616	69897618	1003	-1.16963	4.27203	0.000136264	0.00145483
chr20:16510095:16511439	chr20	16510095	16511439	1345	-1.33766	3.77462	0.000136744	0.00145856
chr17:15552874:15555535	chr17	15552874	15555535	2662	-0.66241	5.97797	0.00013914	0.001482
chrX:80457163:80458030	chrX	80457163	80458030	868	-1.5303	3.47371	0.000139523	0.00148538
chr13:29327255:29328359	chr13	29327255	29328359	1105	-0.973938	4.59116	0.000140048	0.00148884
chr1:193090707:193092835	chr1	193090707	193092835	2129	-0.717653	5.72695	0.000141755	0.00150414
chr13:101106450:101107787	chr13	101106450	101107787	1338	-0.879537	4.86031	0.000143304	0.00151841
chr13:52761300:52763017	chr13	52761300	52763017	1718	-1.24374	4.14021	0.000143535	0.00151943
chr1:16507349:16509858	chr1	16507349	16509858	2510	-0.710342	5.73878	0.000143681	0.00152025
chr18:18883544:18884588	chr18	18883544	18884588	1045	-1.79683	3.11478	0.000144568	0.0015282
chr6:29757909:29759426	chr6	29757909	29759426	1518	-1.29353	3.88338	0.000144921	0.0015312
chr1:198899249:198899694	chr1	198899249	198899694	446	-1.99319	2.92975	0.00014538	0.0015346
chr7:73712881:73713531	chr7	73712881	73713531	651	-1.60956	3.31536	0.000146323	0.0015431
chr5:95157685:95160616	chr5	95157685	95160616	2932	-0.615254	6.12899	0.0001492	0.0015691
chr1:160377640:160378786	chr1	160377640	160378786	1147	-1.72844	3.06945	0.000150388	0.00157928
chr12:109127933:109128723	chr12	109127933	109128723	791	-1.03134	4.47761	0.000151322	0.00158686
chr6:150346212:150347636	chr6	150346212	150347636	1425	-1.10456	4.31524	0.000152391	0.00159583
chr16:3059506:3060689	chr16	3059506	3060689	1184	-1.01031	4.40827	0.000153059	0.00160208
chr16:17665386:17666412	chr16	17665386	17666412	1027	-1.46808	3.74534	0.000154742	0.00161593
chr1:32598863:32599587	chr1	32598863	32599587	725	-1.4195	3.53991	0.000155103	0.00161743
chr3:111457277:111459459	chr3	111457277	111459459	2183	-0.7256	5.55885	0.000155032	0.00161743
chr19:17422276:17423805	chr19	17422276	17423805	1530	-1.49079	3.55398	0.00015603	0.00162407
chr17:76387582:76388466	chr17	76387582	76388466	885	-1.51433	3.40279	0.000157896	0.00164158
chr19:15973783:15974612	chr19	15973783	15974612	830	-1.22051	4.24184	0.000159242	0.00165218
chr3:98230290:98233195	chr3	98230290	98233195	2906	-0.660352	5.87371	0.000159246	0.00165218
chr1:202772041:202772847	chr1	202772041	202772847	807	-1.18263	4.07728	0.000159879	0.00165645
chr3:72387819:72388975	chr3	72387819	72388975	1157	-1.32997	3.75911	0.000160654	0.00166217
chr6:42089609:42091009	chr6	42089609	42091009	1401	-0.881412	4.93994	0.000160888	0.00166382
chrX:2315854:2316467	chrX	2315854	2316467	614	-1.82561	2.89903	0.000162417	0.00167808
chr15:89644296:89645447	chr15	89644296	89645447	1152	-0.921682	4.88442	0.000162814	0.00168141
chr9:80494367:80495365	chr9	80494367	80495365	999	-1.43408	3.50432	0.000163071	0.00168329
chr18:9116727:9118781	chr18	9116727	9118781	2055	-0.904061	4.72015	0.000166016	0.00171132
chr11:109729680:109730995	chr11	109729680	109730995	1316	-1.34741	4.05399	0.000167659	0.00172667
chr2:161522186:161523652	chr2	161522186	161523652	1467	-1.15174	4.12851	0.00017289	0.00177565
chr3:7546656:7547320	chr3	7546656	7547320	665	-1.70862	3.13611	0.000173288	0.00177892
chr7:44660747:44661263	chr7	44660747	44661263	517	-1.83645	2.9044	0.000175454	0.00179704
chr6:43044229:43045467	chr6	43044229	43045467	1239	-1.14894	4.07753	0.00017577	0.00179945
chr4:81047790:81048996	chr4	81047790	81048996	1207	-1.15743	4.1457	0.00017609	0.00180109
chr13:109806205:109809909	chr13	109806205	109809909	3705	-0.628546	6.14943	0.00017848	0.00182303
chr3:45173278:45174867	chr3	45173278	45174867	1590	-1.0345	4.3447	0.00018064	0.00184342
chr1:231530485:231532036	chr1	231530485	231532036	1552	-1.08642	4.23524	0.000183933	0.00187446
chr11:129119428:129120144	chr11	129119428	129120144	717	-1.39163	3.78639	0.000184081	0.00187511
chr1:92197851:92198718	chr1	92197851	92198718	868	-1.27747	3.79547	0.000184343	0.00187693
chr2:224724754:224726942	chr2	224724754	224726942	2189	-0.869477	5.03521	0.000184846	0.00188035
chr5:125781101:125782950	chr5	125781101	125782950	1850	-1.38287	3.73187	0.000192165	0.00194596
chr14:54079848:54081462	chr14	54079848	54081462	1615	-0.8101	5.25094	0.000194647	0.0019676
chr10:114563377:114565275	chr10	114563377	114565275	1899	-0.894751	5.00769	0.000195945	0.00197977
chr2:189358697:189362818	chr2	189358697	189362818	4122	-0.739929	5.78807	0.000198161	0.00199586
chr15:48751726:48752749	chr15	48751726	48752749	1024	-1.78957	3.02585	0.000198417	0.00199754
chr17:40776090:40776782	chr17	40776090	40776782	693	-1.50709	3.50652	0.000201691	0.00202686
chr2:208480617:208483094	chr2	208480617	208483094	2478	-0.841199	5.20524	0.000207014	0.00207214
chr22:36278624:36279664	chr22	36278624	36279664	1041	-1.27857	3.79131	0.00020703	0.00207214
chr20:50358839:50360226	chr20	50358839	50360226	1388	-1.00962	4.40697	0.000208481	0.00208481
chr1:94701305:94704027	chr1	94701305	94704027	2723	-0.762137	5.43243	0.000210638	0.00210356
chr2:174454401:174455897	chr2	174454401	174455897	1497	-1.05103	4.58303	0.00021116	0.00210784
chr6:37101655:37103592	chr6	37101655	37103592	1938	-0.782504	5.33211	0.000214113	0.00213541
chr9:114874619:114875716	chr9	114874619	114875716	1098	-1.21926	4.02842	0.000214614	0.00213946
chr7:7733452:7734084	chr7	7733452	7734084	633	-1.50592	3.54464	0.000216522	0.00215656
chr4:77156672:77157867	chr4	77156672	77157867	1196	-1.47101	3.73409	0.000217031	0.00216067
chr2:23603102:23604629	chr2	23603102	23604629	1528	-0.68113	5.59704	0.0002226	0.0022112
chr11:71751435:71753939	chr11	71751435	71753939	2505	-0.613526	6.02355	0.000223824	0.00222238
chr6:169692144:169693726	chr6	169692144	169693726	1583	-0.854103	4.89882	0.000224741	0.0022295
chr4:95372200:95374970	chr4	95372200	95374970	2771	-0.768589	5.26929	0.000225015	0.00223124
chr19:14491379:14495858	chr19	14491379	14495858	4480	-0.653644	6.36555	0.000227203	0.00224995
chr8:99829158:99830633	chr8	99829158	99830633	1476	-0.945575	4.65383	0.00022716	0.00224995
chr1:233804618:233805056	chr1	233804618	233805056	439	-2.24369	2.38591	0.000228609	0.00225887
chr7:158300607:158301589	chr7	158300607	158301589	983	-2.15509	2.73295	0.000228592	0.00225887
chr3:81791700:81792893	chr3	81791700	81792893	1194	-1.00355	4.52512	0.000230779	0.00227731
chr7:114563165:114564011	chr7	114563165	114564011	847	-1.87955	2.7477	0.000232047	0.0022878
chr4:725380:726020	chr4	725380	726020	641	-2.36127	2.61423	0.000235224	0.00231709
chr20:62533805:62534815	chr20	62533805	62534815	1011	-1.38359	3.5658	0.000238303	0.00234432
chr19:47599172:47600212	chr19	47599172	47600212	1041	-1.1595	4.11759	0.00024056	0.00236238
chr17:55452273:55454378	chr17	55452273	55454378	2106	-0.723846	5.34031	0.000243537	0.00238638
chr2:220117579:220119058	chr2	220117579	220119058	1480	-1.47493	3.56861	0.000245937	0.00240779
chr4:169539840:169540585	chr4	169539840	169540585	746	-1.9718	2.60166	0.000249685	0.0024381
chr11:128893923:128894777	chr11	128893923	128894777	855	-1.31796	3.82059	0.000249821	0.00243837
chr1:149575155:149578573	chr1	149575155	149578573	3419	-0.716441	5.61197	0.000250176	0.00243971
chr1:16275438:16277840	chr1	16275438	16277840	2403	-1.42387	3.50601	0.000254464	0.00247613
chrX:73468386:73471592	chrX	73468386	73471592	3207	-0.789374	5.40696	0.000254629	0.00247666
chr17:35805901:35806615	chr17	35805901	35806615	715	-1.69396	3.04352	0.000255771	0.00248562
chr13:41237990:41239113	chr13	41237990	41239113	1124	-1.41948	3.61173	0.000259016	0.00251279
chr15:42790869:42792150	chr15	42790869	42792150	1282	-1.51597	3.36354	0.000259534	0.00251673
chr6:1485725:1486528	chr6	1485725	1486528	804	-1.43255	3.4985	0.000259876	0.00251786
chr14:65186488:65188257	chr14	65186488	65188257	1770	-0.740207	5.31083	0.000261165	0.00252707
chr12:30946973:30950375	chr12	30946973	30950375	3403	-0.628477	6.18847	0.000265361	0.00256657
chr14:65721510:65723272	chr14	65721510	65723272	1763	-1.01803	4.44439	0.000274444	0.00264642
chr8:126649385:126651303	chr8	126649385	126651303	1919	-0.687268	5.47972	0.000277527	0.00267156
chr1:17674502:17675154	chr1	17674502	17675154	653	-1.84086	2.99251	0.000277909	0.00267193
chr17:6455089:6455959	chr17	6455089	6455959	871	-1.42868	3.35552	0.000278209	0.00267352
chr15:71033088:71035784	chr15	71033088	71035784	2697	-0.680525	5.56033	0.000282251	0.00271005
chr1:148176083:148177547	chr1	148176083	148177547	1465	-0.984893	4.53118	0.000285188	0.0027359
chr7:101513352:101514842	chr7	101513352	101514842	1491	-1.01818	4.41869	0.000285827	0.00274086
chr16:33954174:33955484	chr16	33954174	33955484	1311	-0.724479	5.75125	0.000287216	0.002753
chr12:127544498:127546305	chr12	127544498	127546305	1808	-0.630193	5.78599	0.000288813	0.00276713
chr19:750537:753692	chr19	750537	753692	3156	-0.652064	6.12712	0.000290235	0.00277794
chr17:5737130:5738615	chr17	5737130	5738615	1486	-0.815175	4.95561	0.000291621	0.00278926
chr3:111613563:111615050	chr3	111613563	111615050	1488	-0.929601	4.93506	0.000292902	0.00279912
chr8:131054158:131055519	chr8	131054158	131055519	1362	-0.92756	4.54733	0.000292792	0.00279912
chr14:74211199:74212015	chr14	74211199	74212015	817	-1.24102	3.80795	0.00029406	0.00280659
chr17:73688640:73692618	chr17	73688640	73692618	3979	-0.640202	6.07256	0.000294584	0.0028104
chr12:112007684:112009140	chr12	112007684	112009140	1457	-0.972498	4.4367	0.000296419	0.0028219
chr8:6497807:6503527	chr8	6497807	6503527	5721	-0.741993	6.36416	0.000297033	0.00282655
chr17:61752515:61753486	chr17	61752515	61753486	972	-1.22905	3.88517	0.000297325	0.00282812
chr11:18600684:18601227	chr11	18600684	18601227	544	-2.02857	2.52785	0.000297963	0.00283298
chr11:65778704:65780078	chr11	65778704	65780078	1375	-0.92266	4.59757	0.000301683	0.00286349
chr12:125117034:125118878	chr12	125117034	125118878	1845	-0.830307	4.99802	0.000303736	0.00287933
chr2:182903072:182904236	chr2	182903072	182904236	1165	-1.09885	4.22196	0.000305867	0.00289707
chr6:33226500:33227282	chr6	33226500	33227282	783	-1.75244	2.93606	0.000306684	0.00290359
chr12:104648852:104650980	chr12	104648852	104650980	2129	-0.708275	5.46965	0.000312376	0.00295
chr9:6943357:6946096	chr9	6943357	6946096	2740	-0.82098	4.96674	0.000314331	0.00296596
chr19:5171436:5172387	chr19	5171436	5172387	952	-1.11628	4.06913	0.000315001	0.00297103
chr17:17845554:17846689	chr17	17845554	17846689	1136	-1.52759	3.46004	0.000315679	0.00297618
chr3:48025194:48026293	chr3	48025194	48026293	1100	-1.22148	3.92675	0.000316645	0.00298403
chr14:31500796:31501924	chr14	31500796	31501924	1129	-1.32907	3.69324	0.000316933	0.00298548
chr11:64948106:64951873	chr11	64948106	64951873	3768	-0.633846	5.7271	0.000318272	0.00299558
chr2:239347180:239349514	chr2	239347180	239349514	2335	-0.75575	5.51223	0.000320169	0.00301195
chr8:27805442:27806559	chr8	27805442	27806559	1118	-1.7119	3.14451	0.000320368	0.00301195
chr9:35510557:35512511	chr9	35510557	35512511	1955	-0.854053	4.89545	0.000320415	0.00301195
chr19:53193090:53193918	chr19	53193090	53193918	829	-1.68094	3.1043	0.000321852	0.00302419
chr14:65724997:65725772	chr14	65724997	65725772	776	-1.30099	3.70992	0.000324297	0.0030429
chr15:81148789:81150003	chr15	81148789	81150003	1215	-0.938389	4.70067	0.000324185	0.0030429
chr9:138843491:138844525	chr9	138843491	138844525	1035	-1.35187	3.65619	0.0003256	0.00305173
chr6:151720590:151722122	chr6	151720590	151722122	1533	-0.905302	4.62361	0.00032574	0.00305177
chr7:43117114:43118185	chr7	43117114	43118185	1072	-1.3277	3.63752	0.000326097	0.00305383
chr2:3583212:3585254	chr2	3583212	3585254	2043	-0.702441	5.34504	0.000326648	0.00305516
chr1:55046845:55047661	chr1	55046845	55047661	817	-1.36275	3.45953	0.00033388	0.0031189
chr3:32484178:32486041	chr3	32484178	32486041	1864	-0.969186	4.44558	0.000337035	0.00314575
chr12:1238914:1240224	chr12	1238914	1240224	1311	-0.831091	4.89278	0.00034016	0.00317227
chr18:77330070:77331536	chr18	77330070	77331536	1467	-1.00817	4.33765	0.000342815	0.00319173
chr13:99222651:99225105	chr13	99222651	99225105	2455	-0.669934	5.55364	0.000343944	0.00319825
chr19:49559023:49561484	chr19	49559023	49561484	2462	-0.863978	4.96156	0.000346765	0.00322181
chr22:20923352:20924039	chr22	20923352	20924039	688	-1.00255	4.27532	0.000352465	0.00326934
chr20:48719716:48721085	chr20	48719716	48721085	1370	-0.748278	5.25173	0.000354012	0.00328098
chr2:63001063:63002779	chr2	63001063	63002779	1717	-0.8755	5.13028	0.00035591	0.00329721
chr1:8229162:8230546	chr1	8229162	8230546	1385	-0.846348	5.28231	0.000356936	0.00330535
chr19:7489688:7491111	chr19	7489688	7491111	1424	-1.01828	4.29069	0.00035831	0.0033167
chr8:95731113:95733320	chr8	95731113	95733320	2208	-0.722259	5.36181	0.000360486	0.00332996
chrX:149204145:149205931	chrX	149204145	149205931	1787	-1.06897	4.4351	0.000360983	0.00333318
chr8:143693592:143694384	chr8	143693592	143694384	793	-1.48843	3.29709	0.000362061	0.00333901
chr4:170189422:170193570	chr4	170189422	170193570	4149	-0.613309	5.93303	0.0003654	0.00336703
chr1:144338705:144342097	chr1	144338705	144342097	3393	-0.615595	5.77161	0.000365631	0.00336777
chr1:114429822:114430867	chr1	114429822	114430867	1046	-1.50557	3.24614	0.00036805	0.00338727
chr2:201727007:201730196	chr2	201727007	201730196	3190	-0.640313	5.70188	0.000369629	0.00340041
chr12:51041022:51041476	chr12	51041022	51041476	455	-2.15467	2.33212	0.000371205	0.0034135
chr18:18970861:18971756	chr18	18970861	18971756	896	-1.0579	4.07299	0.000371532	0.00341511
chr17:65487143:65487649	chr17	65487143	65487649	507	-1.75005	2.84381	0.000376822	0.00345382
chr12:50949674:50951480	chr12	50949674	50951480	1807	-1.00127	4.4674	0.000378005	0.00346325
chr17:65633032:65634834	chr17	65633032	65634834	1803	-1.01297	4.23223	0.000378811	0.00346875
chr1:203594938:203596290	chr1	203594938	203596290	1353	-1.04915	4.2492	0.000379891	0.00347625
chr20:45962636:45963389	chr20	45962636	45963389	754	-1.24435	4.03962	0.000380265	0.00347826
chr7:101768015:101769359	chr7	101768015	101769359	1345	-0.88569	4.59222	0.000383043	0.00350081
chr17:43567284:43568859	chr17	43567284	43568859	1576	-0.786314	5.06538	0.00038343	0.00350293
chr17:78734927:78736144	chr17	78734927	78736144	1218	-0.91535	4.50714	0.000385576	0.00352109
chr1:244599155:244600284	chr1	244599155	244600284	1130	-1.36992	3.50433	0.000390132	0.00355674
chr5:150157663:150159637	chr5	150157663	150159637	1975	-0.833563	4.92132	0.000390274	0.00355674
chr6:86069989:86072147	chr6	86069989	86072147	2159	-0.814604	5.07556	0.000390192	0.00355674
chr3:23999896:24001411	chr3	23999896	24001411	1516	-1.01019	4.19306	0.000394799	0.00359214
chr18:11907899:11909659	chr18	11907899	11909659	1761	-0.804143	4.89076	0.000396023	0.00360182
chr14:69285584:69287023	chr14	69285584	69287023	1440	-0.863983	4.87485	0.000400299	0.00363775
chr3:197281386:197283207	chr3	197281386	197283207	1822	-0.778951	5.07691	0.000402461	0.00365444
chr19:16609899:16610532	chr19	16609899	16610532	634	-1.97487	2.48539	0.000403188	0.00365807
chr19:36979689:36980955	chr19	36979689	36980955	1267	-1.00237	4.44621	0.000403031	0.00365807
chr12:14402152:14402772	chr12	14402152	14402772	621	-1.46621	3.38007	0.000404039	0.00366135
chr13:73669725:73671461	chr13	73669725	73671461	1737	-0.949579	4.93623	0.000404216	0.00366147
chr4:39707093:39708757	chr4	39707093	39708757	1665	-0.937954	4.48624	0.000405039	0.00366712
chr2:174516954:174518232	chr2	174516954	174518232	1279	-0.967604	4.58462	0.00040537	0.00366748
chr16:14394930:14396957	chr16	14394930	14396957	2028	-1.05533	4.06968	0.000408253	0.0036876
chr13:101000234:101000649	chr13	101000234	101000649	416	-1.9802	2.60261	0.000410105	0.00370135
chr5:86416015:86418003	chr5	86416015	86418003	1989	-0.714193	5.43183	0.000410021	0.00370135
chr2:219150634:219153458	chr2	219150634	219153458	2825	-0.659064	5.55605	0.00041153	0.00371271
chr11:64773983:64775651	chr11	64773983	64775651	1669	-0.907106	4.72817	0.000414381	0.00373393
chr2:75061084:75062981	chr2	75061084	75062981	1898	-0.877216	4.70484	0.000416685	0.00375167
chr3:53032199:53034364	chr3	53032199	53034364	2166	-0.613157	5.71193	0.000418234	0.0037641
chr16:71741380:71743012	chr16	71741380	71743012	1633	-0.889404	4.64233	0.000426936	0.00383166
chr9:34991792:34993056	chr9	34991792	34993056	1265	-1.1616	3.90993	0.000428304	0.00384239
chr7:100391633:100392394	chr7	100391633	100392394	762	-1.64632	2.94958	0.000438505	0.00392135
chr2:85684613:85686516	chr2	85684613	85686516	1904	-0.93883	4.41849	0.000439899	0.00393068
chr13:73899250:73900869	chr13	73899250	73900869	1620	-1.25804	3.55584	0.00044254	0.00395036
chr2:97197684:97198514	chr2	97197684	97198514	831	-1.28471	3.58384	0.000444791	0.00396532
chr8:37914828:37916418	chr8	37914828	37916418	1591	-1.3033	3.55739	0.000451375	0.0040156
chr2:102422122:102423634	chr2	102422122	102423634	1513	-1.33521	3.59649	0.000452906	0.00402603
chr20:33059441:33061262	chr20	33059441	33061262	1822	-0.892917	4.49957	0.000456311	0.00405469
chr9:138359902:138361638	chr9	138359902	138361638	1737	-0.911428	4.58174	0.000458369	0.00406975
chr19:38877971:38879607	chr19	38877971	38879607	1637	-0.788167	4.94186	0.000462081	0.00409622
chr15:40558435:40559602	chr15	40558435	40559602	1168	-0.977131	4.40808	0.000466994	0.00413649
chr1:172828141:172829274	chr1	172828141	172829274	1134	-0.967323	4.48192	0.000467988	0.00414366
chr1:8762566:8763961	chr1	8762566	8763961	1396	-1.50223	3.24226	0.00046917	0.00415085
chr12:76293380:76295340	chr12	76293380	76295340	1961	-0.978744	4.29723	0.000471057	0.0041659
chr14:74955293:74956420	chr14	74955293	74956420	1128	-0.857769	4.77192	0.000472543	0.00417739
chr13:30422710:30425004	chr13	30422710	30425004	2295	-0.794605	5.18324	0.00047288	0.00417872
chr11:12308094:12310359	chr11	12308094	12310359	2266	-0.728366	5.16682	0.000474718	0.00419124
chr1:147929814:147933429	chr1	147929814	147933429	3616	-0.631544	6.01385	0.000478002	0.00421567
chr17:55517511:55519135	chr17	55517511	55519135	1625	-0.978489	4.23455	0.00048665	0.00428183
chr14:50373812:50375926	chr14	50373812	50375926	2115	-0.725947	5.45038	0.000487714	0.00428898
chr7:75278729:75279725	chr7	75278729	75279725	997	-1.50702	3.30007	0.000495128	0.00434619
chr5:91976202:91978160	chr5	91976202	91978160	1959	-0.837826	4.71786	0.000499472	0.0043826
chr19:53399944:53401252	chr19	53399944	53401252	1309	-0.928147	4.54558	0.000499863	0.0043826
chr8:126398129:126399865	chr8	126398129	126399865	1737	-0.762011	5.15998	0.000500153	0.00438343
chr4:13908974:13909521	chr4	13908974	13909521	548	-1.48266	3.11364	0.000500465	0.00438445
chr11:102434508:102435578	chr11	102434508	102435578	1071	-1.12541	4.47566	0.000511038	0.0044666
chr4:99563831:99564912	chr4	99563831	99564912	1082	-1.04339	4.06544	0.000511801	0.00447152
chr1:14084536:14086050	chr1	14084536	14086050	1515	-1.13749	3.9112	0.000512858	0.00447727
chr19:39919059:39920314	chr19	39919059	39920314	1256	-1.10202	4.02124	0.000514285	0.00448623
chr19:10919576:10920710	chr19	10919576	10920710	1135	-1.33362	3.5269	0.000515237	0.00449119
chr1:219904685:219907842	chr1	219904685	219907842	3158	-0.651587	5.49884	0.000516337	0.00449887
chr22:30194973:30196117	chr22	30194973	30196117	1145	-0.959071	4.38214	0.000522075	0.00454181
chr20:35100178:35101630	chr20	35100178	35101630	1453	-1.08216	3.92363	0.000522541	0.0045441
chr8:54640186:54640840	chr8	54640186	54640840	655	-1.41914	3.39515	0.000526767	0.00457907
chr17:19249299:19251547	chr17	19249299	19251547	2249	-0.891178	4.46067	0.000530193	0.0046035
chr1:85084922:85087012	chr1	85084922	85087012	2091	-0.891838	4.51446	0.000531691	0.00461293
chr18:55454753:55457468	chr18	55454753	55457468	2716	-0.629335	5.72817	0.000544196	0.00471412
chr16:85362601:85363275	chr16	85362601	85363275	675	-1.81078	2.60326	0.000545052	0.00471972
chr14:35182475:35184145	chr14	35182475	35184145	1671	-0.885978	4.69749	0.000546525	0.00472881
chr15:75110752:75111580	chr15	75110752	75111580	829	-1.57598	3.49653	0.000547177	0.00473262
chr14:74741794:74742469	chr14	74741794	74742469	676	-1.36447	3.35667	0.000548175	0.00473943
chr11:128931058:128932335	chr11	128931058	128932335	1278	-0.928038	4.337	0.000548461	0.00474008
chr12:53266840:53269075	chr12	53266840	53269075	2236	-0.620523	5.69677	0.000549979	0.00475136
chr7:23470001:23470441	chr7	23470001	23470441	441	-1.71306	2.74625	0.000551354	0.00475957
chr14:64887572:64888377	chr14	64887572	64888377	806	-1.61143	2.99323	0.000551687	0.00476061
chr6:151334936:151337057	chr6	151334936	151337057	2122	-0.881525	4.95675	0.000552023	0.00476167
chr2:7114010:7114826	chr2	7114010	7114826	817	-1.42318	3.25254	0.000557744	0.00480363
chr16:15575615:15577166	chr16	15575615	15577166	1552	-0.841099	4.84235	0.000559633	0.00481805
chr16:81176882:81178158	chr16	81176882	81178158	1277	-0.733755	5.0465	0.000569712	0.00490294
chr6:30130570:30131342	chr6	30130570	30131342	773	-1.35924	3.41707	0.000571325	0.00491493
chr11:47967301:47969939	chr11	47967301	47969939	2639	-0.720368	5.27435	0.000578904	0.00497249
chr1:55321780:55323225	chr1	55321780	55323225	1446	-1.22088	3.7526	0.000586125	0.00503066
chr10:28286544:28288200	chr10	28286544	28288200	1657	-0.841855	4.56882	0.000587118	0.00503533
chr9:138796628:138797339	chr9	138796628	138797339	712	-1.16312	3.75275	0.000591294	0.00506533
chr1:200608640:200610890	chr1	200608640	200610890	2251	-0.913368	6.15843	0.000591944	0.00506896
chr2:240244101:240245245	chr2	240244101	240245245	1145	-1.61653	2.91902	0.000593607	0.00508126
chr16:70461636:70463329	chr16	70461636	70463329	1694	-0.754871	5.21439	0.000594116	0.00508368
chr14:104187586:104188561	chr14	104187586	104188561	976	-1.09543	4.06546	0.000597168	0.00510589
chr17:45196260:45199101	chr17	45196260	45199101	2842	-0.806205	4.92788	0.000599939	0.00512567
chr20:61435310:61437211	chr20	61435310	61437211	1902	-1.00898	4.30949	0.000600397	0.00512762
chr11:59624553:59626764	chr11	59624553	59626764	2212	-0.606378	5.99532	0.000604768	0.00515906
chr2:85695180:85696414	chr2	85695180	85696414	1235	-0.995931	4.34375	0.000606611	0.00517281
chr1:8482619:8485049	chr1	8482619	8485049	2431	-0.848726	4.79515	0.000612358	0.00521587
chr10:111681891:111683410	chr10	111681891	111683410	1520	-0.778385	4.87275	0.00061302	0.00521952
chr17:79533319:79534592	chr17	79533319	79534592	1274	-0.976974	4.40136	0.000613665	0.00522112
chr22:18114877:18116935	chr22	18114877	18116935	2059	-0.750408	5.98573	0.000613674	0.00522112
chr15:60757459:60758029	chr15	60757459	60758029	571	-1.80095	2.59977	0.000619658	0.00526604
chr7:20256434:20257983	chr7	20256434	20257983	1550	-0.712611	5.20737	0.000621684	0.00528072
chr8:135563455:135564184	chr8	135563455	135564184	730	-1.72835	2.84417	0.000621857	0.00528072
chr2:75090650:75093648	chr2	75090650	75093648	2999	-0.729736	5.08363	0.000625086	0.00530412
chr11:46258405:46260816	chr11	46258405	46260816	2412	-0.865372	4.77132	0.000627631	0.00532168
chr11:71780450:71781955	chr11	71780450	71781955	1506	-0.880383	4.52676	0.000633669	0.00536071
chr22:49768463:49769234	chr22	49768463	49769234	772	-0.929582	4.39742	0.000636282	0.00537888
chr3:27352202:27353754	chr3	27352202	27353754	1553	-1.05212	4.04498	0.000643768	0.00543384
chr11:60920577:60921498	chr11	60920577	60921498	922	-1.33748	3.3973	0.000644618	0.00543896
chr5:77890228:77891763	chr5	77890228	77891763	1536	-0.74308	4.99862	0.000651123	0.00548972
chr8:61620489:61621903	chr8	61620489	61621903	1415	-1.03511	3.98141	0.00065523	0.00552226
chr7:100802468:100804437	chr7	100802468	100804437	1970	-0.827659	4.78534	0.000656206	0.00552841
chr13:112075414:112076146	chr13	112075414	112076146	733	-1.41865	3.17925	0.000657674	0.00553296
chr5:60745170:60747783	chr5	60745170	60747783	2614	-0.618097	5.90107	0.000658383	0.00553427
chr17:824278:824886	chr17	824278	824886	609	-1.76555	3.00333	0.000660598	0.00555081
chr11:35050768:35053231	chr11	35050768	35053231	2464	-0.701458	5.24018	0.000669326	0.00561573
chr10:6778619:6779912	chr10	6778619	6779912	1294	-0.822377	4.60703	0.000681038	0.00569932
chr4:80273782:80274657	chr4	80273782	80274657	876	-0.76005	5.28166	0.00068107	0.00569932
chr16:68698492:68700434	chr16	68698492	68700434	1943	-0.841298	4.88738	0.00069285	0.00578925
chr1:198203504:198204125	chr1	198203504	198204125	622	-1.69556	2.72949	0.000693749	0.00579028
chr7:100769690:100770776	chr7	100769690	100770776	1087	-1.03724	4.02534	0.000693378	0.00579028
chr1:43422491:43425532	chr1	43422491	43425532	3042	-0.668122	5.38043	0.000694723	0.00579194
chr16:85648059:85649800	chr16	85648059	85649800	1742	-0.779383	4.93129	0.000694207	0.00579194
chr7:16707545:16708492	chr7	16707545	16708492	948	-1.02931	3.97964	0.000705842	0.00587154
chr12:50353429:50354175	chr12	50353429	50354175	747	-1.27926	3.49148	0.000712981	0.00592652
chr19:9707472:9708611	chr19	9707472	9708611	1140	-1.45742	3.08619	0.0007128	0.00592652
chr3:129512773:129515322	chr3	129512773	129515322	2550	-0.718986	5.19762	0.000715331	0.00594385
chr3:196290197:196291219	chr3	196290197	196291219	1023	-1.56109	3.02732	0.000720944	0.00598384
chr4:89533279:89534041	chr4	89533279	89534041	763	-1.30166	3.41298	0.000725296	0.00601604
chr3:49537759:49538911	chr3	49537759	49538911	1153	-0.966231	4.43281	0.000726139	0.00602027
chr13:27609685:27611681	chr13	27609685	27611681	1997	-0.877283	4.41222	0.000744386	0.00615334
chr1:90330919:90332439	chr1	90330919	90332439	1521	-0.758429	5.09212	0.000746106	0.00616216
chr9:97779201:97782458	chr9	97779201	97782458	3258	-0.775792	4.80085	0.000746278	0.00616216
chr5:16889642:16890777	chr5	16889642	16890777	1136	-0.866075	4.47803	0.000751019	0.00619446
chr1:212734104:212735743	chr1	212734104	212735743	1640	-0.68862	5.46251	0.000752608	0.00620528
chr7:120952857:120954712	chr7	120952857	120954712	1856	-0.645884	5.49316	0.000756932	0.00623405
chr19:40029771:40031156	chr19	40029771	40031156	1386	-0.881329	4.37869	0.000760005	0.00625706
chr20:34710001:34710774	chr20	34710001	34710774	774	-1.48488	3.23071	0.000763289	0.00628179
chr11:110233128:110234351	chr11	110233128	110234351	1224	-0.919511	4.49123	0.000765633	0.00629646
chr9:123637602:123640143	chr9	123637602	123640143	2542	-0.668429	5.28705	0.000777606	0.00638321
chr5:141255240:141257075	chr5	141255240	141257075	1836	-1.06151	4.09061	0.00078178	0.00641043
chr1:246316925:246318397	chr1	246316925	246318397	1473	-0.965202	4.35113	0.0007838	0.00642229
chr1:201618926:201619822	chr1	201618926	201619822	897	-1.52783	3.19623	0.000786041	0.00643359
chr16:74482483:74484412	chr16	74482483	74484412	1930	-0.74263	4.93246	0.000786819	0.00643526
chr1:113216352:113218436	chr1	113216352	113218436	2085	-0.63601	5.66767	0.00079155	0.00646924
chr15:57843706:57845218	chr15	57843706	57845218	1513	-1.1748	3.69068	0.000814594	0.00663579
chr4:13546109:13547042	chr4	13546109	13547042	934	-1.39245	3.17173	0.000825274	0.00671059
chr7:131206201:131207690	chr7	131206201	131207690	1490	-1.0036	4.06825	0.000826876	0.00672118
chr12:50991361:50992360	chr12	50991361	50992360	1000	-1.52721	2.93419	0.000827915	0.00672435
chr16:69096112:69096968	chr16	69096112	69096968	857	-1.0916	3.96527	0.000828167	0.00672435
chr7:148841154:148842817	chr7	148841154	148842817	1664	-0.630805	5.49798	0.000829638	0.00673386
chr12:121667068:121668487	chr12	121667068	121668487	1420	-1.0989	3.84858	0.000834235	0.00676872
chr8:75262065:75263155	chr8	75262065	75263155	1091	-1.05755	3.88806	0.000837793	0.00679513
chr4:108774247:108775717	chr4	108774247	108775717	1471	-0.826472	4.5569	0.000842465	0.00682352
chr2:81662983:81664130	chr2	81662983	81664130	1148	-1.53919	2.93739	0.000846344	0.00685208
chr1:214680222:214680998	chr1	214680222	214680998	777	-2.08368	2.86924	0.000853829	0.00689881
chr22:45148162:45149869	chr22	45148162	45149869	1708	-1.02626	4.02531	0.000858035	0.00692672
chr18:51674836:51677326	chr18	51674836	51677326	2491	-0.680666	5.20909	0.000863767	0.00696546
chr9:6955050:6956378	chr9	6955050	6956378	1329	-1.34844	3.44738	0.000865515	0.00697106
chr10:86072718:86074748	chr10	86072718	86074748	2031	-0.661562	5.37751	0.00087933	0.00707061
chr9:114556996:114557910	chr9	114556996	114557910	915	-1.78223	2.57981	0.000881072	0.00707954
chr2:27516147:27517031	chr2	27516147	27517031	885	-1.38421	3.1719	0.000886366	0.00711697
chr7:76211779:76213376	chr7	76211779	76213376	1598	-0.785757	5.05388	0.000887046	0.00711988
chr11:94521045:94521897	chr11	94521045	94521897	853	-1.17811	3.7755	0.000888787	0.0071313
chr15:68878529:68879039	chr15	68878529	68879039	511	-1.70912	2.72885	0.000891113	0.0071474
chr19:38269927:38270657	chr19	38269927	38270657	731	-1.54581	2.88152	0.000893321	0.00715743
chr20:382313:383175	chr20	382313	383175	863	-1.32542	4.05758	0.00089428	0.00716166
chr16:31884924:31886216	chr16	31884924	31886216	1293	-0.814686	4.79063	0.000895928	0.00717062
chr7:43733512:43734881	chr7	43733512	43734881	1370	-1.2049	3.84138	0.000896855	0.00717548
chr3:155455800:155456361	chr3	155455800	155456361	562	-1.72632	2.64613	0.000899101	0.00719088
chr3:129370383:129371146	chr3	129370383	129371146	764	-1.2089	3.70496	0.000899879	0.00719197
chr9:132804911:132805733	chr9	132804911	132805733	823	-1.72906	2.55534	0.000899804	0.00719197
chr20:47561254:47563002	chr20	47561254	47563002	1749	-0.707015	5.14812	0.000909201	0.0072613
chr22:32072147:32073205	chr22	32072147	32073205	1059	-1.13358	3.76516	0.000918518	0.00731745
chr12:76476708:76478961	chr12	76476708	76478961	2254	-0.843051	4.78552	0.000920522	0.00732821
chr22:31202325:31202824	chr22	31202325	31202824	500	-1.52071	2.9374	0.000933005	0.00741259
chr7:75638537:75639251	chr7	75638537	75639251	715	-1.78706	2.79385	0.000934237	0.00741627
chr8:96145912:96147516	chr8	96145912	96147516	1605	-0.88439	4.50766	0.000938003	0.00744094
chr17:773384:773936	chr17	773384	773936	553	-1.67669	2.88478	0.000943724	0.00747653
chr20:45902809:45904048	chr20	45902809	45904048	1240	-0.799552	4.90272	0.000943825	0.00747653
chr2:242211091:242213248	chr2	242211091	242213248	2158	-0.944817	4.45723	0.000950962	0.00752243
chr2:233702755:233703566	chr2	233702755	233703566	812	-1.15809	3.71754	0.000959229	0.00758515
chr12:117352938:117355021	chr12	117352938	117355021	2084	-0.759227	4.76385	0.00096126	0.00759433
chr10:33250635:33252794	chr10	33250635	33252794	2160	-0.635644	5.75169	0.000962748	0.00759957
chr16:68670067:68671002	chr16	68670067	68671002	936	-1.38441	3.26435	0.00096381	0.00760527
chr17:78806156:78807375	chr17	78806156	78807375	1220	-0.957958	4.20532	0.000966134	0.00762093
chr2:234334964:234335637	chr2	234334964	234335637	674	-1.25859	3.38814	0.000980602	0.00771509
chr6:130946656:130948297	chr6	130946656	130948297	1642	-0.966205	4.08625	0.000980391	0.00771509
chr16:31007613:31008803	chr16	31007613	31008803	1191	-0.916748	4.27698	0.00099455	0.00780935
chr13:42621206:42623201	chr13	42621206	42623201	1996	-1.0911	3.95758	0.000995439	0.00781094
chr7:100099962:100102143	chr7	100099962	100102143	2182	-0.605655	5.58132	0.00099723	0.00782217
chr2:75072219:75073258	chr2	75072219	75073258	1040	-0.9589	4.49327	0.000999667	0.00783306
chr19:48101859:48102856	chr19	48101859	48102856	998	-0.965172	4.13674	0.00101031	0.0078999
chr5:96036367:96037490	chr5	96036367	96037490	1124	-1.22922	3.61559	0.00102813	0.00801982
chr7:101685120:101686227	chr7	101685120	101686227	1108	-0.88027	4.33828	0.00102815	0.00801982
chr11:68109309:68110959	chr11	68109309	68110959	1651	-0.714263	5.17606	0.00104665	0.00814478
chr20:6102590:6104585	chr20	6102590	6104585	1996	-0.623044	5.45916	0.00104683	0.00814478
chr9:69882545:69883889	chr9	69882545	69883889	1345	-0.782505	5.0433	0.00104708	0.00814478
chr10:65251517:65252383	chr10	65251517	65252383	867	-1.3907	3.28617	0.0010506	0.008166
chr4:174112072:174114323	chr4	174112072	174114323	2252	-0.800203	4.81256	0.0010509	0.008166
chr8:22297751:22300112	chr8	22297751	22300112	2362	-0.617374	5.48764	0.00105022	0.008166
chr4:22475913:22477899	chr4	22475913	22477899	1987	-0.921643	4.61795	0.00105201	0.00816895
chr10:69856511:69857957	chr10	69856511	69857957	1447	-0.772338	4.81362	0.00105301	0.00817389
chr4:48081866:48082480	chr4	48081866	48082480	615	-1.37154	3.14814	0.00105858	0.00820572
chr4:174102336:174104221	chr4	174102336	174104221	1886	-0.719452	5.01665	0.00106826	0.00827218
chr11:307832:309544	chr11	307832	309544	1713	-0.767831	4.69387	0.00107142	0.00828517
chr2:204444032:204444639	chr2	204444032	204444639	608	-1.31621	3.43346	0.0010711	0.00828517
chr20:52367985:52371239	chr20	52367985	52371239	3255	-0.608066	5.85414	0.00107685	0.00831856
chr17:65386315:65387546	chr17	65386315	65387546	1232	-0.993607	4.07358	0.00108537	0.00837864
chr19:19483773:19484154	chr19	19483773	19484154	382	-1.33482	3.24147	0.00110343	0.00849462
chr20:61297628:61299020	chr20	61297628	61299020	1393	-1.2499	3.52623	0.00110742	0.00852014
chr16:2065264:2066080	chr16	2065264	2066080	817	-1.18774	3.51318	0.00111183	0.00853874
chr10:69853393:69855608	chr10	69853393	69855608	2216	-0.701096	5.14754	0.00111568	0.00856248
chr15:66124868:66125733	chr15	66124868	66125733	866	-1.0412	3.91832	0.00111969	0.00858733
chr16:30007864:30008345	chr16	30007864	30008345	482	-1.56223	2.80795	0.00112354	0.00861394
chr10:29879082:29879782	chr10	29879082	29879782	701	-1.5051	2.92143	0.00113345	0.00867504
chr14:31698828:31699393	chr14	31698828	31699393	566	-1.51937	2.93893	0.00114676	0.00876199
chr2:110873383:110874732	chr2	110873383	110874732	1350	-0.850331	4.76126	0.00114905	0.00877348
chr1:16675224:16675794	chr1	16675224	16675794	571	-1.43358	3.28481	0.00114959	0.00877465
chr11:120418290:120419154	chr11	120418290	120419154	865	-1.41532	3.00197	0.00115639	0.00882228
chr16:84047468:84048378	chr16	84047468	84048378	911	-0.769512	4.66592	0.00115698	0.00882228
chr2:65547037:65547869	chr2	65547037	65547869	833	-1.36739	3.19599	0.00116299	0.00886181
chr4:39516652:39517097	chr4	39516652	39517097	446	-1.46231	2.97133	0.00116746	0.0088898
chr13:114539791:114541275	chr13	114539791	114541275	1485	-0.703944	5.3196	0.0011684	0.00889395
chr3:9925382:9926767	chr3	9925382	9926767	1386	-0.661381	5.59808	0.00117187	0.00891434
chr1:32581352:32582475	chr1	32581352	32582475	1124	-1.18042	3.47107	0.00117642	0.00894587
chr5:72934105:72935145	chr5	72934105	72935145	1041	-1.33224	3.51115	0.00118036	0.00896976
chr8:28226627:28227612	chr8	28226627	28227612	986	-0.710167	4.95997	0.00118771	0.00901486
chr1:76231120:76232118	chr1	76231120	76232118	999	-0.888256	4.73844	0.00120255	0.00910134
chr1:90097707:90100148	chr1	90097707	90100148	2442	-0.791187	4.9319	0.00120417	0.00911055
chr4:40995170:40997650	chr4	40995170	40997650	2481	-0.65604	5.45931	0.00120593	0.00912075
chr14:67878122:67879196	chr14	67878122	67879196	1075	-0.926272	4.18822	0.00121156	0.009151
chr1:88271617:88272477	chr1	88271617	88272477	861	-1.00077	3.87153	0.00121285	0.00915767
chr16:74589467:74590888	chr16	74589467	74590888	1422	-0.843909	4.48821	0.00122488	0.00924225
chr11:66822563:66825312	chr11	66822563	66825312	2750	-0.681502	5.36566	0.00122974	0.00926644
chr17:46025973:46027139	chr17	46025973	46027139	1167	-0.730685	4.81473	0.00123374	0.00929346
chr19:12777069:12778038	chr19	12777069	12778038	970	-1.21162	3.49118	0.00124056	0.00933544
chr1:214639802:214641359	chr1	214639802	214641359	1558	-0.711765	4.93353	0.0012416	0.0093401
chr11:61393898:61394854	chr11	61393898	61394854	957	-1.16561	3.61529	0.00124507	0.00935996
chr1:78566909:78568345	chr1	78566909	78568345	1437	-1.02468	4.18964	0.00125108	0.0093894
chr16:87521026:87521911	chr16	87521026	87521911	886	-1.24031	3.46215	0.0012659	0.00948474
chr17:17816886:17818048	chr17	17816886	17818048	1163	-0.922009	4.08724	0.00127506	0.00955014
chr11:92733603:92734676	chr11	92733603	92734676	1074	-1.0562	4.21167	0.00127917	0.00957774
chr6:56818060:56821025	chr6	56818060	56821025	2966	-0.616572	5.42451	0.00128325	0.00960512
chr15:41085298:41086363	chr15	41085298	41086363	1066	-0.917574	4.3035	0.00129207	0.00966468
chr12:78249344:78250025	chr12	78249344	78250025	682	-1.23636	3.33199	0.0012972	0.00969656
chr9:131033442:131033852	chr9	131033442	131033852	411	-1.18094	3.58601	0.00130016	0.00970896
chr1:26704210:26705235	chr1	26704210	26705235	1026	-1.26935	3.25286	0.0013137	0.00980024
chr11:34379920:34381428	chr11	34379920	34381428	1509	-0.963598	3.99134	0.00131753	0.00981906
chr9:139890140:139892006	chr9	139890140	139892006	1867	-0.763499	4.76802	0.00132403	0.00985763
chr22:22005317:22007185	chr22	22005317	22007185	1869	-0.78607	4.65385	0.00132578	0.00986741
chr3:47830201:47831842	chr3	47830201	47831842	1642	-0.840478	4.39627	0.00133541	0.00992588
chr3:8911039:8912234	chr3	8911039	8912234	1196	-0.912007	4.20222	0.00133706	0.00993482
chr10:81917906:81920055	chr10	81917906	81920055	2150	-0.789709	4.84988	0.00133847	0.009942
chr1:193073044:193075086	chr1	193073044	193075086	2043	-0.641018	5.20444	0.00133957	0.00994688
chr16:66550413:66551942	chr16	66550413	66551942	1530	-0.774393	4.67507	0.00134251	0.00995432

## Sheet: H3K27ac increased in Fbw7-Arg
Peakid	Chr	Start	End	Length	logFC	logCPM	PValue	FDR
chr1:1172756:1174294	chr1	1172756	1174294	1539	2.24111	3.96558	7.5289e-09	4.53157e-07
chr1:8192685:8195419	chr1	8192685	8195419	2735	0.623866	6.60122	8.42004e-05	0.00130907
chr1:8213807:8216329	chr1	8213807	8216329	2523	0.622926	6.38302	0.000104537	0.00156274
chr1:8949116:8951167	chr1	8949116	8951167	2052	0.987808	6.49879	1.6562e-08	8.81206e-07
chr1:9001454:9002292	chr1	9001454	9002292	839	1.33668	3.55411	0.000589175	0.00656828
chr1:9223235:9224570	chr1	9223235	9224570	1336	0.809672	4.87556	0.00036286	0.00447612
chr1:9241214:9243204	chr1	9241214	9243204	1991	1.0916	4.93644	3.69501e-06	9.33193e-05
chr1:16125221:16128061	chr1	16125221	16128061	2841	0.67176	6.9396	8.72054e-06	0.000193404
chr1:16275438:16277840	chr1	16275438	16277840	2403	1.89245	5.20097	4.9059e-12	8.15347e-10
chr1:16465422:16468117	chr1	16465422	16468117	2696	0.702159	6.02325	3.66978e-05	0.000654396
chr1:18051502:18052326	chr1	18051502	18052326	825	1.96751	3.99341	2.14446e-07	8.03541e-06
chr1:19267562:19268951	chr1	19267562	19268951	1390	1.18159	4.81687	1.77695e-06	5.00603e-05
chr1:20084850:20085653	chr1	20084850	20085653	804	1.61315	3.14873	0.00040852	0.00493842
chr1:20251044:20254202	chr1	20251044	20254202	3159	0.760648	5.44078	0.000307263	0.00390369
chr1:22257249:22259545	chr1	22257249	22259545	2297	1.10259	5.8791	1.73595e-08	9.15143e-07
chr1:22261484:22264341	chr1	22261484	22264341	2858	0.731383	5.65113	9.44908e-05	0.00144073
chr1:25348316:25349840	chr1	25348316	25349840	1525	1.15228	4.76292	6.00929e-06	0.000140901
chr1:27174478:27176540	chr1	27174478	27176540	2063	1.09328	5.22859	1.16038e-06	3.50592e-05
chr1:27322263:27329689	chr1	27322263	27329689	7427	0.648583	7.89731	1.23978e-06	3.72055e-05
chr1:30181136:30183443	chr1	30181136	30183443	2308	1.1429	5.35088	2.90786e-07	1.04355e-05
chr1:32053379:32055382	chr1	32053379	32055382	2004	0.812316	5.72041	1.07198e-05	0.00023279
chr1:35753435:35755066	chr1	35753435	35755066	1632	1.51544	4.66677	5.99624e-08	2.63927e-06
chr1:36816433:36817684	chr1	36816433	36817684	1252	1.15223	3.97921	0.000409262	0.00494248
chr1:39651104:39652250	chr1	39651104	39652250	1147	1.02844	4.16647	0.000718156	0.00775
chr1:39661773:39663490	chr1	39661773	39663490	1718	1.40506	4.96342	1.072e-07	4.38201e-06
chr1:39856765:39866125	chr1	39856765	39866125	9361	0.648666	8.47703	1.62742e-06	4.63027e-05
chr1:39872006:39874922	chr1	39872006	39874922	2917	0.959973	5.85132	3.1921e-07	1.1314e-05
chr1:41384408:41386003	chr1	41384408	41386003	1596	0.886365	4.89798	0.000334316	0.00418708
chr1:42345824:42346736	chr1	42345824	42346736	913	1.57938	3.44428	0.000109793	0.00163069
chr1:42365335:42368382	chr1	42365335	42368382	3048	1.0572	6.13225	1.44758e-08	7.86635e-07
chr1:43472427:43475287	chr1	43472427	43475287	2861	0.821181	6.33015	1.26624e-06	3.7711e-05
chr1:44046367:44048548	chr1	44046367	44048548	2182	0.770425	5.70961	5.21629e-05	0.000869331
chr1:44299929:44301847	chr1	44299929	44301847	1919	1.46127	5.15611	7.46513e-09	4.50501e-07
chr1:44350099:44351941	chr1	44350099	44351941	1843	0.673446	5.9471	0.000158068	0.00223616
chr1:46337223:46338352	chr1	46337223	46338352	1130	2.20711	4.02809	1.94428e-08	1.00134e-06
chr1:46394191:46395670	chr1	46394191	46395670	1480	0.997584	5.56482	6.56008e-07	2.11583e-05
chr1:51068671:51069969	chr1	51068671	51069969	1299	1.46108	4.08712	5.3906e-05	0.000895128
chr1:52435683:52436277	chr1	52435683	52436277	595	1.77952	2.94802	0.00026222	0.00339526
chr1:52439039:52439885	chr1	52439039	52439885	847	1.95587	3.76349	7.53303e-07	2.38931e-05
chr1:55893290:55896978	chr1	55893290	55896978	3689	0.754092	6.07605	1.14985e-05	0.000246204
chr1:56046135:56047336	chr1	56046135	56047336	1202	2.39378	3.71346	1.29585e-07	5.21341e-06
chr1:64808261:64810201	chr1	64808261	64810201	1941	0.691783	5.61655	0.00017169	0.00238618
chr1:65638331:65645233	chr1	65638331	65645233	6903	0.849062	7.64003	1.05045e-08	6.02222e-07
chr1:68435471:68436627	chr1	68435471	68436627	1157	2.08084	3.55428	1.95647e-05	0.000386773
chr1:68444486:68446085	chr1	68444486	68446085	1600	2.17809	5.03993	1.84951e-12	3.56412e-10
chr1:76702055:76706642	chr1	76702055	76706642	4588	0.894713	6.80895	9.73357e-08	4.051e-06
chr1:76719527:76721596	chr1	76719527	76721596	2070	0.735468	5.38672	0.000352655	0.00437535
chr1:77462852:77465221	chr1	77462852	77465221	2370	1.00821	5.10078	6.99881e-06	0.000160336
chr1:78001353:78003998	chr1	78001353	78003998	2646	0.744729	5.8618	8.91258e-05	0.00137112
chr1:86088684:86089443	chr1	86088684	86089443	760	2.27481	2.49912	0.000414493	0.0049922
chr1:94080467:94084559	chr1	94080467	94084559	4093	0.970899	6.21847	3.47934e-07	1.21814e-05
chr1:94157082:94161130	chr1	94157082	94161130	4049	0.699276	7.00007	3.89737e-06	9.77838e-05
chr1:95045066:95046401	chr1	95045066	95046401	1336	0.801781	4.8314	0.000488561	0.00566988
chr1:95070417:95072540	chr1	95070417	95072540	2124	0.742072	5.55242	0.000120497	0.00176791
chr1:95085967:95090214	chr1	95085967	95090214	4248	1.39706	6.21536	9.52964e-11	9.8884e-09
chr1:95111504:95112652	chr1	95111504	95112652	1149	0.945598	4.55108	0.000361498	0.00446263
chr1:95118806:95120896	chr1	95118806	95120896	2091	0.793786	5.03649	0.000443731	0.00526417
chr1:95193390:95194237	chr1	95193390	95194237	848	1.69445	3.917	3.80918e-06	9.6097e-05
chr1:95266975:95268232	chr1	95266975	95268232	1258	1.02333	4.288	0.000526221	0.00599766
chr1:111770651:111772000	chr1	111770651	111772000	1350	0.980998	4.85512	7.90632e-05	0.00124013
chr1:112793670:112795386	chr1	112793670	112795386	1717	1.15159	5.61282	1.66724e-07	6.47315e-06
chr1:117030237:117034011	chr1	117030237	117034011	3775	0.947002	6.42148	8.13322e-08	3.45391e-06
chr1:117420946:117422622	chr1	117420946	117422622	1677	1.60759	4.48449	1.38006e-07	5.49438e-06
chr1:120107188:120109127	chr1	120107188	120109127	1940	0.76127	4.8621	0.000654255	0.00717796
chr1:151811809:151812799	chr1	151811809	151812799	991	2.69374	3.86838	1.3933e-09	1.02407e-07
chr1:151963757:151968196	chr1	151963757	151968196	4440	0.626272	7.01513	1.49211e-05	0.000308819
chr1:151996299:151997454	chr1	151996299	151997454	1156	2.64501	3.42039	7.9226e-08	3.37071e-06
chr1:153498033:153499336	chr1	153498033	153499336	1304	1.68359	3.44288	4.26067e-05	0.000737959
chr1:155931341:155932987	chr1	155931341	155932987	1647	0.922668	4.95181	4.75341e-05	0.00080499
chr1:162508278:162509291	chr1	162508278	162509291	1014	1.11322	4.97152	3.5876e-06	9.12093e-05
chr1:170776073:170777302	chr1	170776073	170777302	1230	1.57457	3.55682	9.77729e-05	0.00147995
chr1:171885327:171886757	chr1	171885327	171886757	1431	1.00275	4.29738	0.00053871	0.00610964
chr1:172607777:172608959	chr1	172607777	172608959	1183	1.72019	3.7587	9.52448e-06	0.000208611
chr1:172714221:172716275	chr1	172714221	172716275	2055	1.33203	5.05636	3.03191e-08	1.47932e-06
chr1:172730341:172731862	chr1	172730341	172731862	1522	2.08199	3.63519	1.64315e-06	4.66923e-05
chr1:172806462:172809955	chr1	172806462	172809955	3494	0.608468	6.5761	0.000105636	0.00157711
chr1:172839256:172845336	chr1	172839256	172845336	6081	0.745592	7.46822	6.32595e-07	2.04896e-05
chr1:173010903:173013955	chr1	173010903	173013955	3053	1.21193	7.0941	4.62956e-11	5.50078e-09
chr1:173238336:173239856	chr1	173238336	173239856	1521	1.80935	4.54331	3.01058e-08	1.47204e-06
chr1:175137976:175139949	chr1	175137976	175139949	1974	0.798058	5.31967	9.51226e-05	0.0014494
chr1:181103332:181105712	chr1	181103332	181105712	2381	1.3482	6.01496	7.01562e-11	7.58878e-09
chr1:182204837:182205804	chr1	182204837	182205804	968	1.45059	3.36025	0.000421228	0.00505474
chr1:183970950:183972103	chr1	183970950	183972103	1154	1.0668	4.67892	7.72648e-05	0.00121776
chr1:186120879:186122545	chr1	186120879	186122545	1667	1.47399	4.00298	1.77589e-05	0.000358808
chr1:187996034:187997405	chr1	187996034	187997405	1372	1.39753	3.93792	3.57644e-05	0.000640079
chr1:192526004:192530907	chr1	192526004	192530907	4904	0.93096	5.85842	8.46025e-07	2.6468e-05
chr1:194988942:194989472	chr1	194988942	194989472	531	2.5072	2.4795	8.9148e-05	0.00137112
chr1:195560744:195562072	chr1	195560744	195562072	1329	0.869189	5.04115	0.000102053	0.0015336
chr1:202024237:202028285	chr1	202024237	202028285	4049	0.867745	6.99104	1.91063e-07	7.27815e-06
chr1:202053628:202056199	chr1	202053628	202056199	2572	1.0041	6.16656	6.50708e-08	2.82614e-06
chr1:203146180:203147654	chr1	203146180	203147654	1475	1.0521	3.99277	0.000844856	0.00883055
chr1:203632292:203633190	chr1	203632292	203633190	899	1.26479	3.57106	0.000505053	0.00580255
chr1:203642623:203643652	chr1	203642623	203643652	1030	0.844932	4.67751	0.000850304	0.00888345
chr1:205409260:205412847	chr1	205409260	205412847	3588	0.627318	6.98549	3.15029e-05	0.000577016
chr1:205902383:205903780	chr1	205902383	205903780	1398	2.3242	3.93872	1.3653e-08	7.54435e-07
chr1:207180061:207181893	chr1	207180061	207181893	1833	0.611292	6.01082	0.0002674	0.00345466
chr1:207477927:207478844	chr1	207477927	207478844	918	1.35987	3.73702	9.68801e-05	0.00146815
chr1:212685999:212687831	chr1	212685999	212687831	1833	0.90101	4.64526	0.000318315	0.00402625
chr1:212768088:212771342	chr1	212768088	212771342	3255	1.27257	6.36031	1.03648e-10	1.06585e-08
chr1:214611521:214614289	chr1	214611521	214614289	2769	0.723464	5.42854	0.000168686	0.00235441
chr1:218671550:218673274	chr1	218671550	218673274	1725	1.27162	4.27264	4.48158e-05	0.000768674
chr1:218757989:218760108	chr1	218757989	218760108	2120	0.622445	5.99884	0.00024896	0.00324937
chr1:218878532:218880596	chr1	218878532	218880596	2065	0.839185	5.37932	2.91931e-05	0.000543389
chr1:224730236:224731651	chr1	224730236	224731651	1416	0.930519	4.75572	0.000205702	0.00276992
chr1:226078890:226079357	chr1	226078890	226079357	468	2.49584	3.1286	1.55448e-06	4.46708e-05
chr1:226084716:226085100	chr1	226084716	226085100	385	1.89139	3.08667	7.11621e-05	0.00113483
chr1:231530485:231532036	chr1	231530485	231532036	1552	0.736718	5.06914	0.000642789	0.00706976
chr1:231647572:231648944	chr1	231647572	231648944	1373	2.39415	4.48186	6.20675e-11	6.84294e-09
chr1:232512578:232513512	chr1	232512578	232513512	935	1.19377	3.59272	0.0008152	0.00858712
chr1:232757659:232759393	chr1	232757659	232759393	1735	1.1812	4.82059	3.31207e-06	8.45794e-05
chr1:233842674:233844851	chr1	233842674	233844851	2178	1.3959	5.046	2.41925e-08	1.21397e-06
chr1:235115739:235117461	chr1	235115739	235117461	1723	0.87564	5.01632	8.83906e-05	0.00136313
chr1:245397650:245399202	chr1	245397650	245399202	1553	2.2681	4.03771	3.65401e-09	2.40786e-07
chr1:245451815:245452496	chr1	245451815	245452496	682	1.69379	3.40565	7.82311e-05	0.00123045
chr1:246301588:246304332	chr1	246301588	246304332	2745	0.643765	6.28151	0.000116288	0.00171603
chr1:246316925:246318397	chr1	246316925	246318397	1473	0.905925	5.25878	4.73719e-05	0.00080358
chr1:246319251:246320735	chr1	246319251	246320735	1485	0.930841	4.76884	0.000102203	0.00153384
chr10:4284281:4286307	chr10	4284281	4286307	2027	1.80243	5.15014	3.8669e-11	4.74202e-09
chr10:4386237:4387499	chr10	4386237	4387499	1263	1.0759	4.51205	7.31462e-05	0.00116243
chr10:4569660:4570319	chr10	4569660	4570319	660	2.12088	3.41861	1.95913e-06	5.43077e-05
chr10:4703479:4708386	chr10	4703479	4708386	4908	0.771409	7.41774	2.31164e-07	8.53631e-06
chr10:4711700:4716604	chr10	4711700	4716604	4905	1.61574	7.42228	9.15608e-16	6.36264e-13
chr10:4719747:4721268	chr10	4719747	4721268	1522	2.79118	4.00566	1.24673e-10	1.24847e-08
chr10:4726949:4730615	chr10	4726949	4730615	3667	2.017	6.66703	4.58727e-17	4.91663e-14
chr10:4733586:4734754	chr10	4733586	4734754	1169	2.25463	4.57623	4.8219e-11	5.59638e-09
chr10:4745788:4747330	chr10	4745788	4747330	1543	1.88756	5.4113	4.63193e-12	7.81026e-10
chr10:4767047:4768987	chr10	4767047	4768987	1941	1.08793	6.60214	2.12717e-08	1.0816e-06
chr10:4775347:4776486	chr10	4775347	4776486	1140	1.41475	4.3171	3.06987e-06	7.91882e-05
chr10:4805390:4807210	chr10	4805390	4807210	1821	2.70749	4.78332	1.46898e-13	3.91706e-11
chr10:4812206:4814738	chr10	4812206	4814738	2533	1.7068	6.17888	1.66425e-11	2.32711e-09
chr10:4822300:4823598	chr10	4822300	4823598	1299	2.99494	4.30691	1.68303e-12	3.29874e-10
chr10:5588056:5591404	chr10	5588056	5591404	3349	0.614768	6.27668	0.000151839	0.00216137
chr10:11835475:11837041	chr10	11835475	11837041	1567	0.902678	4.84154	0.000169092	0.00235633
chr10:13799978:13800828	chr10	13799978	13800828	851	1.77343	3.41295	6.30426e-05	0.0010275
chr10:17007731:17008587	chr10	17007731	17008587	857	1.14879	3.95794	0.000604747	0.00670602
chr10:17256528:17259744	chr10	17256528	17259744	3217	1.0099	6.74113	9.19175e-08	3.86054e-06
chr10:17269167:17271044	chr10	17269167	17271044	1878	1.93177	4.98068	4.34228e-11	5.21714e-09
chr10:17271806:17274230	chr10	17271806	17274230	2425	1.67466	5.35301	8.22433e-11	8.69126e-09
chr10:21461849:21465409	chr10	21461849	21465409	3561	0.767288	5.91585	3.67969e-05	0.000655145
chr10:21483312:21484402	chr10	21483312	21484402	1091	0.968262	4.51526	0.00020013	0.00271534
chr10:21573832:21576408	chr10	21573832	21576408	2577	1.06766	4.82591	2.3083e-05	0.000444449
chr10:21580465:21584076	chr10	21580465	21584076	3612	1.29855	6.52691	5.94599e-11	6.65139e-09
chr10:21602832:21605734	chr10	21602832	21605734	2903	0.930816	6.15922	2.42566e-07	8.88583e-06
chr10:22534503:22537270	chr10	22534503	22537270	2768	0.715118	6.1107	7.9177e-05	0.00124107
chr10:22540758:22542982	chr10	22540758	22542982	2225	0.875316	5.95664	1.06878e-06	3.25921e-05
chr10:22937289:22938750	chr10	22937289	22938750	1462	1.72215	3.28771	0.000169454	0.00235795
chr10:24671918:24673184	chr10	24671918	24673184	1267	1.72387	3.24698	9.00079e-05	0.0013788
chr10:28181729:28183192	chr10	28181729	28183192	1464	0.969339	4.82401	5.20082e-05	0.000867383
chr10:29824081:29824838	chr10	29824081	29824838	758	2.58618	3.5663	4.62935e-08	2.11475e-06
chr10:30023932:30025690	chr10	30023932	30025690	1759	0.967689	4.57973	0.000161236	0.00226978
chr10:30345167:30347662	chr10	30345167	30347662	2496	0.69346	5.81372	0.000126484	0.00183694
chr10:32043463:32044731	chr10	32043463	32044731	1269	1.7425	3.47981	0.000137765	0.00198196
chr10:45476227:45477888	chr10	45476227	45477888	1662	0.636758	5.84832	0.000483893	0.00562709
chr10:48601144:48602793	chr10	48601144	48602793	1650	1.95993	4.40371	3.41976e-09	2.27971e-07
chr10:64143148:64144867	chr10	64143148	64144867	1720	3.03188	4.81181	5.42334e-15	2.48736e-12
chr10:64693883:64694432	chr10	64693883	64694432	550	2.54359	2.516	4.36192e-05	0.000752652
chr10:71599322:71600091	chr10	71599322	71600091	770	1.88719	3.35109	1.72831e-05	0.000350431
chr10:71620693:71622246	chr10	71620693	71622246	1554	1.62705	5.06655	9.6576e-09	5.59263e-07
chr10:71622669:71627443	chr10	71622669	71627443	4775	2.21931	6.48224	3.27968e-17	4.17831e-14
chr10:71627963:71630027	chr10	71627963	71630027	2065	1.68889	4.92931	3.35502e-09	2.24307e-07
chr10:72334962:72340325	chr10	72334962	72340325	5364	0.652645	7.80861	1.90685e-06	5.32617e-05
chr10:75832073:75832729	chr10	75832073	75832729	657	2.27198	3.21359	2.62018e-06	6.92234e-05
chr10:80724179:80726064	chr10	80724179	80726064	1886	0.748522	5.17991	0.000302838	0.00385517
chr10:86184234:86185243	chr10	86184234	86185243	1010	1.32555	4.16464	2.14986e-05	0.000419936
chr10:89601940:89604046	chr10	89601940	89604046	2107	0.853348	5.65726	1.63364e-05	0.000333298
chr10:89604637:89606433	chr10	89604637	89606433	1797	0.929392	5.6858	3.88672e-06	9.76236e-05
chr10:99309425:99310136	chr10	99309425	99310136	712	2.74872	3.07291	6.4617e-07	2.08704e-05
chr10:99473051:99475324	chr10	99473051	99475324	2274	0.748784	5.76753	2.61476e-05	0.000493414
chr10:101426821:101427470	chr10	101426821	101427470	650	2.12418	3.58364	4.5058e-06	0.000110274
chr10:102104998:102108473	chr10	102104998	102108473	3476	0.752409	6.90192	8.43521e-07	2.64257e-05
chr10:102767520:102769636	chr10	102767520	102769636	2117	1.85119	4.69678	1.1495e-09	8.75761e-08
chr10:104069856:104071125	chr10	104069856	104071125	1270	0.982011	5.13234	1.15476e-05	0.000246793
chr10:105504715:105508023	chr10	105504715	105508023	3309	1.0887	6.46703	1.03292e-08	5.93656e-07
chr10:105649739:105650716	chr10	105649739	105650716	978	1.063	4.49755	6.53852e-05	0.00105966
chr10:114415475:114419623	chr10	114415475	114419623	4149	1.07582	6.36399	7.41336e-09	4.48557e-07
chr10:114422787:114424299	chr10	114422787	114424299	1513	1.21471	5.03544	5.36283e-07	1.7695e-05
chr10:114675103:114676091	chr10	114675103	114676091	989	1.22667	4.79244	5.46667e-06	0.000130473
chr10:124253767:124255428	chr10	124253767	124255428	1662	0.934641	4.73226	0.000117711	0.00173368
chr10:132892387:132893755	chr10	132892387	132893755	1369	2.29235	3.72653	8.38784e-08	3.55545e-06
chr11:3926006:3927234	chr11	3926006	3927234	1229	1.10529	3.95235	0.000472967	0.00552245
chr11:6340062:6344145	chr11	6340062	6344145	4084	0.694118	6.94744	4.37648e-06	0.000108148
chr11:8720791:8722304	chr11	8720791	8722304	1514	1.07456	4.87013	1.12027e-05	0.00024122
chr11:8787994:8790711	chr11	8787994	8790711	2718	1.30902	5.41428	1.06989e-07	4.38119e-06
chr11:8861707:8862286	chr11	8861707	8862286	580	2.40831	2.689	3.78781e-05	0.000670973
chr11:10828980:10831736	chr11	10828980	10831736	2757	0.626708	5.97828	0.000244231	0.0032004
chr11:12101586:12102193	chr11	12101586	12102193	608	1.67201	3.74719	1.48287e-05	0.000307183
chr11:12107063:12110346	chr11	12107063	12110346	3284	0.629604	6.51362	0.000102186	0.00153384
chr11:12111260:12112669	chr11	12111260	12112669	1410	0.643149	5.89667	0.000219617	0.00292465
chr11:12184220:12190334	chr11	12184220	12190334	6115	0.717743	7.83831	2.10203e-07	7.90226e-06
chr11:12199400:12205800	chr11	12199400	12205800	6401	0.606581	7.69606	4.11097e-06	0.000102582
chr11:12210988:12211764	chr11	12210988	12211764	777	1.35209	3.52191	0.000436001	0.00519126
chr11:13156820:13157716	chr11	13156820	13157716	897	2.4849	3.70616	3.07611e-08	1.48214e-06
chr11:17003097:17004008	chr11	17003097	17004008	912	1.5973	3.66606	1.80999e-05	0.00036485
chr11:28857141:28859106	chr11	28857141	28859106	1966	1.55515	3.68861	7.37178e-05	0.00116747
chr11:33744019:33746564	chr11	33744019	33746564	2546	1.61535	5.58183	4.89315e-11	5.61049e-09
chr11:34701687:34707993	chr11	34701687	34707993	6307	0.724277	6.68211	6.4958e-06	0.000150466
chr11:35236142:35236833	chr11	35236142	35236833	692	1.70384	3.63619	1.86931e-05	0.000374144
chr11:46776606:46778328	chr11	46776606	46778328	1723	0.939042	4.45612	0.000577046	0.0064645
chr11:67055068:67056667	chr11	67055068	67056667	1600	0.662992	5.46782	0.000561051	0.00632548
chr11:67888686:67891105	chr11	67888686	67891105	2420	0.814266	5.82121	6.79044e-06	0.000156344
chr11:68775633:68778925	chr11	68775633	68778925	3293	0.647988	5.69611	0.000222396	0.0029548
chr11:68841990:68844349	chr11	68841990	68844349	2360	2.36603	5.40752	4.61695e-15	2.30165e-12
chr11:68847281:68848748	chr11	68847281	68848748	1468	1.0378	4.57111	8.36216e-05	0.00130184
chr11:69087944:69089693	chr11	69087944	69089693	1750	1.31366	4.7013	4.46129e-06	0.000109536
chr11:69311341:69312264	chr11	69311341	69312264	924	1.52483	3.04324	0.000834498	0.00874222
chr11:69793289:69796899	chr11	69793289	69796899	3611	0.69776	8.07058	3.06799e-07	1.09417e-05
chr11:69862291:69864202	chr11	69862291	69864202	1912	1.56106	5.24567	5.0563e-10	4.32653e-08
chr11:69909301:69911693	chr11	69909301	69911693	2393	1.40699	4.84967	1.23089e-07	4.9695e-06
chr11:69923013:69926450	chr11	69923013	69926450	3438	1.29898	5.53102	5.18931e-09	3.29643e-07
chr11:70004226:70007046	chr11	70004226	70007046	2821	1.19647	5.5256	2.76455e-08	1.36045e-06
chr11:70327722:70329802	chr11	70327722	70329802	2081	1.15606	5.13075	7.5689e-07	2.39738e-05
chr11:70993335:70993880	chr11	70993335	70993880	546	2.38505	2.55756	0.000162757	0.00228691
chr11:73231938:73233240	chr11	73231938	73233240	1303	1.38178	3.96172	3.96079e-05	0.000696007
chr11:73362702:73363947	chr11	73362702	73363947	1246	1.42631	4.13531	3.02321e-05	0.000557999
chr11:73844820:73848462	chr11	73844820	73848462	3643	0.850005	6.12946	2.17545e-06	5.91784e-05
chr11:78054701:78056548	chr11	78054701	78056548	1848	1.7584	4.17691	2.78816e-07	1.00532e-05
chr11:78076051:78076931	chr11	78076051	78076931	881	1.33605	4.13724	2.10603e-05	0.000411726
chr11:88268365:88269860	chr11	88268365	88269860	1496	0.992195	5.22769	2.19128e-05	0.000426937
chr11:88287860:88289615	chr11	88287860	88289615	1756	0.960036	4.92794	0.00096791	0.00991784
chr11:95888769:95889627	chr11	95888769	95889627	859	1.53416	3.72603	5.26413e-05	0.00087603
chr11:95979272:95980858	chr11	95979272	95980858	1587	1.6319	5.20395	3.40247e-10	3.04787e-08
chr11:96047052:96048595	chr11	96047052	96048595	1544	1.31914	4.98352	1.03948e-07	4.28728e-06
chr11:100557604:100559127	chr11	100557604	100559127	1524	0.729926	4.92449	0.000878869	0.00914439
chr11:100609990:100613876	chr11	100609990	100613876	3887	1.41816	6.69259	2.75006e-12	4.9657e-10
chr11:100618793:100625160	chr11	100618793	100625160	6368	0.661691	7.28299	2.42924e-06	6.52311e-05
chr11:100644889:100650112	chr11	100644889	100650112	5224	1.4077	7.52395	4.03949e-14	1.3047e-11
chr11:100679442:100681469	chr11	100679442	100681469	2028	1.47874	4.55935	3.22116e-07	1.13993e-05
chr11:100698299:100699202	chr11	100698299	100699202	904	1.38839	3.24174	0.000922848	0.00951562
chr11:102215784:102219372	chr11	102215784	102219372	3589	0.725861	6.44218	1.81216e-05	0.00036485
chr11:102472931:102476066	chr11	102472931	102476066	3136	0.636099	6.96182	1.64631e-05	0.000335583
chr11:105806371:105809291	chr11	105806371	105809291	2921	0.837701	5.46266	2.41024e-05	0.00046175
chr11:109219902:109221425	chr11	109219902	109221425	1524	1.35575	3.74106	0.000128769	0.00186659
chr11:111503669:111507717	chr11	111503669	111507717	4049	2.65672	6.37055	5.33496e-20	1.35935e-16
chr11:119566928:119567887	chr11	119566928	119567887	960	1.35916	4.17983	3.24395e-05	0.000590398
chr11:120387744:120388957	chr11	120387744	120388957	1214	1.29949	3.71367	0.000245263	0.00320843
chr11:124768244:124768902	chr11	124768244	124768902	659	1.94403	3.14677	4.37986e-05	0.000755181
chr11:125317945:125318663	chr11	125317945	125318663	719	1.43681	3.23284	0.000689162	0.00750065
chr11:128317767:128319541	chr11	128317767	128319541	1775	0.86687	5.37799	1.39464e-05	0.000291275
chr11:128336745:128338982	chr11	128336745	128338982	2238	1.53276	5.08297	1.20213e-09	9.06814e-08
chr12:3445517:3447154	chr12	3445517	3447154	1638	0.894727	5.04267	9.0377e-05	0.00138353
chr12:12971589:12973774	chr12	12971589	12973774	2186	1.33052	6.26435	4.92278e-11	5.61638e-09
chr12:13324643:13327189	chr12	13324643	13327189	2547	1.08009	5.89046	1.42676e-07	5.67043e-06
chr12:13355310:13360211	chr12	13355310	13360211	4902	0.720051	7.30526	4.69235e-07	1.56878e-05
chr12:13492130:13493597	chr12	13492130	13493597	1468	1.54949	4.79341	1.01936e-08	5.87338e-07
chr12:13710687:13714811	chr12	13710687	13714811	4125	0.92111	7.1122	5.93535e-09	3.7087e-07
chr12:13720698:13729039	chr12	13720698	13729039	8342	0.707721	8.55266	4.18366e-08	1.94604e-06
chr12:13731569:13735722	chr12	13731569	13735722	4154	0.682202	6.98691	6.25518e-06	0.00014548
chr12:13743534:13745770	chr12	13743534	13745770	2237	1.29585	5.72008	2.05914e-09	1.47563e-07
chr12:15062772:15064420	chr12	15062772	15064420	1649	1.27912	4.9396	1.09589e-06	3.32421e-05
chr12:15066100:15067279	chr12	15066100	15067279	1180	1.54304	3.76218	1.93869e-05	0.000383921
chr12:19951573:19954812	chr12	19951573	19954812	3240	2.20157	4.80587	1.48225e-11	2.11125e-09
chr12:21225970:21228052	chr12	21225970	21228052	2083	0.83378	5.55084	4.68521e-05	0.000797634
chr12:27700196:27712109	chr12	27700196	27712109	11914	1.32059	8.26601	1.31106e-15	8.59006e-13
chr12:27716001:27719145	chr12	27716001	27719145	3145	1.5728	6.09131	6.866e-13	1.52865e-10
chr12:27725422:27729002	chr12	27725422	27729002	3581	1.82034	6.00715	6.5042e-14	1.98872e-11
chr12:27733455:27734928	chr12	27733455	27734928	1474	1.42531	4.53622	3.79629e-07	1.31307e-05
chr12:31158546:31159684	chr12	31158546	31159684	1139	1.72403	3.67787	8.93603e-06	0.00019685
chr12:31623371:31626725	chr12	31623371	31626725	3355	1.66179	5.8002	1.33014e-11	1.91127e-09
chr12:31635276:31636458	chr12	31635276	31636458	1183	1.15736	4.55594	1.27315e-05	0.000268591
chr12:31669973:31673548	chr12	31669973	31673548	3576	0.725194	6.85493	3.66039e-06	9.26492e-05
chr12:46613407:46616375	chr12	46613407	46616375	2969	1.19423	5.29488	1.35832e-07	5.41722e-06
chr12:49880942:49882099	chr12	49880942	49882099	1158	1.1524	4.72406	1.23906e-05	0.00026285
chr12:49882976:49886038	chr12	49882976	49886038	3063	0.610309	6.82262	3.162e-05	0.000578699
chr12:50789234:50791139	chr12	50789234	50791139	1906	1.11274	5.15231	1.28949e-06	3.8205e-05
chr12:52355517:52356155	chr12	52355517	52356155	639	1.15823	3.88103	0.000420271	0.00504853
chr12:52834509:52835780	chr12	52834509	52835780	1272	1.53741	4.37866	6.08844e-07	1.98324e-05
chr12:52836240:52836981	chr12	52836240	52836981	742	1.44571	3.57037	0.000119347	0.00175552
chr12:52889361:52891348	chr12	52889361	52891348	1988	1.41754	5.35042	4.50403e-09	2.89318e-07
chr12:52916088:52917314	chr12	52916088	52917314	1227	1.35314	3.83565	8.02906e-05	0.0012551
chr12:53954555:53956136	chr12	53954555	53956136	1582	0.851873	4.65887	0.000642206	0.00706673
chr12:54052066:54054094	chr12	54052066	54054094	2029	1.18643	6.27282	6.46298e-10	5.38942e-08
chr12:54222305:54222902	chr12	54222305	54222902	598	2.12983	3.14475	2.20327e-05	0.000427886
chr12:54766399:54771235	chr12	54766399	54771235	4837	1.19249	7.35344	1.60661e-11	2.26029e-09
chr12:58780836:58781395	chr12	58780836	58781395	560	1.75216	2.83423	0.000530101	0.00603589
chr12:58818677:58820346	chr12	58818677	58820346	1670	1.05104	4.70209	7.75173e-05	0.00122006
chr12:60366397:60368163	chr12	60366397	60368163	1767	1.44787	4.50028	4.03602e-07	1.3897e-05
chr12:63094307:63099341	chr12	63094307	63099341	5035	1.89147	5.96391	9.95104e-15	4.00346e-12
chr12:63121867:63128989	chr12	63121867	63128989	7123	0.98227	7.0061	1.1673e-09	8.86377e-08
chr12:63177520:63183439	chr12	63177520	63183439	5920	0.831785	5.58749	2.89278e-05	0.000539327
chr12:63187596:63188179	chr12	63187596	63188179	584	1.62179	3.07599	0.000441879	0.00525035
chr12:66419000:66419690	chr12	66419000	66419690	691	1.25801	3.96683	9.92998e-05	0.00149812
chr12:79357490:79358097	chr12	79357490	79358097	608	1.20441	3.78337	0.000548713	0.00620468
chr12:80169660:80170556	chr12	80169660	80170556	897	1.48284	3.66866	7.89863e-05	0.00123978
chr12:80175890:80176476	chr12	80175890	80176476	587	1.68385	2.91574	0.000918211	0.00947207
chr12:83409245:83411289	chr12	83409245	83411289	2045	1.24589	5.04353	3.01975e-07	1.07864e-05
chr12:85486614:85487730	chr12	85486614	85487730	1117	2.60894	3.50141	5.28532e-08	2.36263e-06
chr12:89051086:89052927	chr12	89051086	89052927	1842	1.38745	5.46558	1.67739e-08	8.90417e-07
chr12:89763860:89765470	chr12	89763860	89765470	1611	1.64605	4.19912	4.21644e-07	1.43672e-05
chr12:92080743:92081501	chr12	92080743	92081501	759	2.08614	2.74594	0.000445786	0.00528036
chr12:93963547:93966258	chr12	93963547	93966258	2712	0.896599	5.29584	1.98436e-05	0.000390938
chr12:94018308:94020223	chr12	94018308	94020223	1916	0.728613	5.69787	0.000290008	0.0037195
chr12:101693329:101694354	chr12	101693329	101694354	1026	2.19407	3.83229	5.43854e-08	2.42168e-06
chr12:111846563:111848987	chr12	111846563	111848987	2425	0.770765	5.09649	0.000336007	0.00420596
chr12:111849768:111850984	chr12	111849768	111850984	1217	0.891845	4.34754	0.000909315	0.00939721
chr12:116996321:116998034	chr12	116996321	116998034	1714	1.16223	4.71602	5.11564e-06	0.000123356
chr12:120675145:120677128	chr12	120675145	120677128	1984	0.621635	5.8076	0.00030294	0.00385517
chr12:123382714:123383907	chr12	123382714	123383907	1194	0.903662	4.41473	0.00073645	0.0078991
chr12:124994051:124994829	chr12	124994051	124994829	779	1.85759	3.3223	4.38548e-05	0.000755581
chr12:124996647:124998504	chr12	124996647	124998504	1858	0.856811	5.48678	3.12326e-05	0.00057298
chr13:21015759:21016960	chr13	21015759	21016960	1202	1.82294	3.88137	6.26585e-07	2.03237e-05
chr13:21608115:21608737	chr13	21608115	21608737	623	2.84847	2.91362	2.55607e-06	6.7764e-05
chr13:22809245:22810389	chr13	22809245	22810389	1145	1.39766	4.00654	2.18423e-05	0.000425924
chr13:23277332:23278408	chr13	23277332	23278408	1077	1.4641	3.43906	0.000200228	0.00271534
chr13:34511139:34512891	chr13	34511139	34512891	1753	1.71843	4.7884	1.58945e-08	8.47656e-07
chr13:34515060:34515859	chr13	34515060	34515859	800	2.3505	3.7208	1.11615e-07	4.54627e-06
chr13:34593663:34595023	chr13	34593663	34595023	1361	1.12219	4.02134	0.000584389	0.00652127
chr13:34618167:34619532	chr13	34618167	34619532	1366	1.78006	4.23928	2.28806e-07	8.48317e-06
chr13:34729224:34732147	chr13	34729224	34732147	2924	0.73305	6.67376	6.63263e-06	0.000152864
chr13:34738470:34739277	chr13	34738470	34739277	808	1.53722	3.13231	0.000735325	0.00789834
chr13:44816662:44819928	chr13	44816662	44819928	3267	0.952849	6.19257	1.98611e-07	7.48368e-06
chr13:44854175:44856917	chr13	44854175	44856917	2743	2.43326	5.21483	1.31482e-14	5.11042e-12
chr13:45629414:45631092	chr13	45629414	45631092	1679	0.865988	5.42251	1.49502e-05	0.000309142
chr13:45752879:45754243	chr13	45752879	45754243	1365	1.72186	4.18961	1.90583e-07	7.27198e-06
chr13:45762973:45765102	chr13	45762973	45765102	2130	1.55936	4.785	6.77938e-08	2.92777e-06
chr13:45778775:45782864	chr13	45778775	45782864	4090	1.04972	6.93937	3.58798e-10	3.16966e-08
chr13:45790955:45796111	chr13	45790955	45796111	5157	0.795147	7.37274	3.44281e-07	1.20904e-05
chr13:45854126:45856637	chr13	45854126	45856637	2512	0.794625	6.14593	7.80675e-06	0.000176379
chr13:45865237:45867355	chr13	45865237	45867355	2119	0.754321	5.75283	2.92308e-05	0.000543651
chr13:46073797:46076151	chr13	46073797	46076151	2355	0.902532	5.65162	6.56316e-06	0.00015172
chr13:48640374:48641422	chr13	48640374	48641422	1049	1.97935	3.50923	4.18408e-06	0.000104179
chr13:51102807:51104421	chr13	51102807	51104421	1615	0.968292	5.14671	1.47711e-05	0.000306267
chr13:53359506:53362815	chr13	53359506	53362815	3310	1.88324	6.20427	1.2125e-14	4.79398e-12
chr13:73985151:73986724	chr13	73985151	73986724	1574	1.80559	4.43085	5.14001e-08	2.30667e-06
chr13:73994862:73997512	chr13	73994862	73997512	2651	0.909459	6.43377	1.47427e-07	5.82895e-06
chr13:74002060:74004807	chr13	74002060	74004807	2748	0.706275	5.91931	5.02399e-05	0.00084218
chr13:76059069:76061369	chr13	76059069	76061369	2301	1.83682	5.60551	2.2944e-12	4.31272e-10
chr13:80509632:80511343	chr13	80509632	80511343	1712	1.93302	3.60639	5.81816e-06	0.000137209
chr13:91369413:91370342	chr13	91369413	91370342	930	1.46424	3.08677	0.000950215	0.00975395
chr13:99623978:99626072	chr13	99623978	99626072	2095	1.00305	5.70515	2.77402e-07	1.00179e-05
chr13:99629987:99630875	chr13	99629987	99630875	889	2.86232	3.39251	6.47363e-08	2.81695e-06
chr13:99881071:99881756	chr13	99881071	99881756	686	1.6981	3.24056	0.000113525	0.00167958
chr13:109832726:109834109	chr13	109832726	109834109	1384	1.53276	4.4672	2.61082e-07	9.4925e-06
chr13:109863432:109866294	chr13	109863432	109866294	2863	0.905847	5.721	3.63005e-06	9.20844e-05
chr13:109901607:109903821	chr13	109901607	109903821	2215	0.920827	5.38221	1.2156e-05	0.000258113
chr13:109905693:109908321	chr13	109905693	109908321	2629	0.636509	5.73544	0.000618529	0.00684561
chr13:110663977:110665104	chr13	110663977	110665104	1128	1.01987	4.33923	0.000280263	0.00360459
chr13:110746355:110747940	chr13	110746355	110747940	1586	1.07317	4.94136	4.94545e-06	0.00011963
chr13:114539791:114541275	chr13	114539791	114541275	1485	0.855162	6.11787	6.60566e-06	0.000152549
chr14:31883264:31884303	chr14	31883264	31884303	1040	1.61571	3.49217	5.69284e-05	0.000939872
chr14:35147014:35148044	chr14	35147014	35148044	1031	1.13187	4.32174	0.000123901	0.00181089
chr14:50441365:50444229	chr14	50441365	50444229	2865	0.738991	6.79623	2.11368e-06	5.77035e-05
chr14:50478969:50481469	chr14	50478969	50481469	2501	0.849014	6.50318	4.25508e-07	1.44774e-05
chr14:51133721:51137958	chr14	51133721	51137958	4238	0.967575	6.7031	1.1464e-08	6.50725e-07
chr14:51142111:51146337	chr14	51142111	51146337	4227	0.759984	7.10068	3.31969e-07	1.16939e-05
chr14:55110333:55111156	chr14	55110333	55111156	824	2.12546	3.54118	2.31067e-06	6.23391e-05
chr14:59583339:59584794	chr14	59583339	59584794	1456	1.14215	4.60304	3.34783e-05	0.000606896
chr14:61568900:61572447	chr14	61568900	61572447	3548	0.624286	6.92487	1.68868e-05	0.000343306
chr14:61613409:61615966	chr14	61613409	61615966	2558	1.4886	5.54621	1.07646e-10	1.10202e-08
chr14:61643515:61646879	chr14	61643515	61646879	3365	0.802144	7.2762	2.9834e-07	1.06732e-05
chr14:65928397:65929885	chr14	65928397	65929885	1489	1.69989	3.71493	1.15291e-05	0.000246629
chr14:65943923:65946274	chr14	65943923	65946274	2352	2.13661	5.52483	1.33768e-14	5.11263e-12
chr14:67398242:67400190	chr14	67398242	67400190	1949	0.952877	5.1632	8.39845e-05	0.0013066
chr14:67718211:67718824	chr14	67718211	67718824	614	1.29656	4.35693	3.1333e-05	0.000574363
chr14:69021556:69022573	chr14	69021556	69022573	1018	1.06795	4.29606	0.000200835	0.00271571
chr14:69031170:69032473	chr14	69031170	69032473	1304	1.37598	4.16131	1.24243e-05	0.000263322
chr14:69042351:69044977	chr14	69042351	69044977	2627	0.661591	5.95836	0.000403299	0.00490114
chr14:69064450:69067029	chr14	69064450	69067029	2580	0.90245	6.35668	1.8957e-07	7.24537e-06
chr14:69148902:69150104	chr14	69148902	69150104	1203	1.55689	4.31587	1.85611e-06	5.20347e-05
chr14:69154297:69155205	chr14	69154297	69155205	909	1.89608	4.39793	1.71562e-08	9.06513e-07
chr14:69161397:69162690	chr14	69161397	69162690	1294	1.75442	4.27607	8.01581e-07	2.52498e-05
chr14:69245576:69248196	chr14	69245576	69248196	2621	0.999746	5.49906	1.58897e-05	0.000325632
chr14:70446998:70448089	chr14	70446998	70448089	1092	2.33307	3.2091	9.93683e-06	0.000216608
chr14:72943191:72944712	chr14	72943191	72944712	1522	1.54679	4.37843	5.44789e-07	1.79498e-05
chr14:74981162:74981802	chr14	74981162	74981802	641	3.56549	2.335	6.34501e-06	0.000147271
chr14:75045406:75047408	chr14	75045406	75047408	2003	1.01891	5.00279	3.79208e-05	0.000670973
chr14:75696465:75697855	chr14	75696465	75697855	1391	0.874033	5.17636	4.7565e-05	0.00080499
chr14:89452101:89454333	chr14	89452101	89454333	2233	1.3813	4.71899	1.7064e-07	6.58772e-06
chr14:93502808:93503679	chr14	93502808	93503679	872	1.45936	3.64334	8.33354e-05	0.00129827
chr14:94493253:94495595	chr14	94493253	94495595	2343	0.707899	5.04641	0.000710474	0.00767795
chr14:95064584:95068859	chr14	95064584	95068859	4276	0.724332	6.74858	2.92165e-06	7.58768e-05
chr14:95714320:95716371	chr14	95714320	95716371	2052	0.879352	5.10625	6.86905e-05	0.00110155
chr14:95730566:95733202	chr14	95730566	95733202	2637	0.6025	6.2874	0.000187311	0.00257201
chr14:96875400:96877023	chr14	96875400	96877023	1624	1.59817	3.59033	5.64992e-05	0.000933459
chr14:101158248:101160667	chr14	101158248	101160667	2420	0.646813	6.08805	0.000130414	0.00188685
chr14:102728319:102730512	chr14	102728319	102730512	2194	1.49348	4.78622	3.06819e-08	1.48214e-06
chr14:102743309:102750462	chr14	102743309	102750462	7154	0.867468	6.10733	1.3489e-06	3.97086e-05
chr14:105131667:105133805	chr14	105131667	105133805	2139	0.608888	6.46591	0.000182312	0.00251248
chr14:105632513:105634619	chr14	105632513	105634619	2107	0.783218	4.95573	0.000674793	0.00738002
chr15:31214260:31215898	chr15	31214260	31215898	1639	2.5908	4.38175	1.01883e-11	1.5371e-09
chr15:31617662:31619618	chr15	31617662	31619618	1957	0.811439	5.03141	0.00029913	0.00381728
chr15:31688944:31691260	chr15	31688944	31691260	2317	0.749122	4.92297	0.000792482	0.00838634
chr15:36649677:36650361	chr15	36649677	36650361	685	1.53958	3.17431	0.000622065	0.00688143
chr15:36655073:36656705	chr15	36655073	36656705	1633	1.01566	5.05994	1.53016e-05	0.000316043
chr15:36699533:36700547	chr15	36699533	36700547	1015	1.15611	3.89958	0.000403979	0.0049068
chr15:42186220:42187654	chr15	42186220	42187654	1435	1.16107	4.24565	0.000124638	0.00181741
chr15:44393472:44397091	chr15	44393472	44397091	3620	1.08101	6.49661	5.76701e-09	3.61336e-07
chr15:44507183:44508881	chr15	44507183	44508881	1699	0.844067	4.83016	0.000390549	0.00475628
chr15:45471580:45472824	chr15	45471580	45472824	1245	2.71124	4.00936	1.52797e-10	1.52345e-08
chr15:45887156:45888345	chr15	45887156	45888345	1190	1.38457	4.37907	2.49142e-06	6.63567e-05
chr15:50454937:50456120	chr15	50454937	50456120	1184	1.1113	3.97322	0.000430971	0.00514517
chr15:52120481:52123219	chr15	52120481	52123219	2739	0.76205	6.01351	1.41129e-05	0.000294483
chr15:52155700:52157627	chr15	52155700	52157627	1928	1.01435	5.63721	3.68756e-07	1.28515e-05
chr15:52346570:52347968	chr15	52346570	52347968	1399	2.15917	4.79664	1.68936e-11	2.33375e-09
chr15:52385172:52387027	chr15	52385172	52387027	1856	1.26729	4.07119	9.60292e-05	0.00145837
chr15:52553994:52554760	chr15	52553994	52554760	767	1.49912	3.65569	7.35582e-05	0.00116655
chr15:56199434:56200479	chr15	56199434	56200479	1046	0.998921	4.8154	0.000124764	0.00181772
chr15:57352282:57353885	chr15	57352282	57353885	1604	2.04502	4.20906	1.23187e-08	6.87327e-07
chr15:59483799:59484286	chr15	59483799	59484286	488	3.03155	3.42497	9.60886e-09	5.57849e-07
chr15:59559201:59561599	chr15	59559201	59561599	2399	1.30278	5.69236	2.08093e-09	1.4866e-07
chr15:59565157:59571724	chr15	59565157	59571724	6568	0.990873	7.5786	1.78904e-10	1.7458e-08
chr15:59585746:59589148	chr15	59585746	59589148	3403	0.883111	7.22332	8.16917e-09	4.87852e-07
chr15:60660273:60675770	chr15	60660273	60675770	15498	0.703281	9.01226	1.20663e-08	6.76541e-07
chr15:60698987:60701411	chr15	60698987	60701411	2425	0.852322	5.5948	8.60448e-06	0.0001912
chr15:63448284:63450524	chr15	63448284	63450524	2241	0.714949	5.89529	3.50193e-05	0.000628866
chr15:67390126:67391530	chr15	67390126	67391530	1405	1.65236	4.68995	1.74072e-08	9.15552e-07
chr15:70766427:70768910	chr15	70766427	70768910	2484	1.24559	5.32834	6.25433e-08	2.73189e-06
chr15:71155015:71156732	chr15	71155015	71156732	1718	1.5893	4.69554	3.07649e-08	1.48214e-06
chr15:74248373:74250007	chr15	74248373	74250007	1635	1.73072	4.28503	8.42868e-08	3.56617e-06
chr15:74712283:74717176	chr15	74712283	74717176	4894	0.640175	7.33524	3.68172e-06	9.30861e-05
chr15:77799355:77801582	chr15	77799355	77801582	2228	1.37512	5.56368	2.56056e-09	1.76864e-07
chr15:84047414:84049954	chr15	84047414	84049954	2541	0.977398	5.42147	2.28075e-06	6.16772e-05
chr15:93523602:93525304	chr15	93523602	93525304	1703	3.57195	4.60001	1.52638e-15	9.46027e-13
chr15:100582456:100584905	chr15	100582456	100584905	2450	0.719434	6.10601	3.0372e-05	0.00055943
chr15:101666421:101668816	chr15	101666421	101668816	2396	0.804776	5.4253	8.17084e-05	0.00127552
chr15:101707757:101708859	chr15	101707757	101708859	1103	1.47481	3.47292	0.000328287	0.00413187
chr16:2844407:2844961	chr16	2844407	2844961	555	2.64536	3.2495	6.92229e-07	2.21089e-05
chr16:4010089:4012367	chr16	4010089	4012367	2279	0.75589	5.49658	0.000103764	0.0015522
chr16:4102481:4104674	chr16	4102481	4104674	2194	0.603777	5.87605	0.000447408	0.00529136
chr16:10848884:10849363	chr16	10848884	10849363	480	1.60447	2.92069	0.000783824	0.0083216
chr16:10964318:10966354	chr16	10964318	10966354	2037	1.91654	4.39165	8.92874e-09	5.28069e-07
chr16:20910765:20918996	chr16	20910765	20918996	8232	0.815874	7.95181	8.60256e-09	5.11072e-07
chr16:20920132:20926210	chr16	20920132	20926210	6079	1.28264	6.65839	7.01367e-12	1.11693e-09
chr16:20948896:20949971	chr16	20948896	20949971	1076	2.39695	2.8165	1.44088e-05	0.000300232
chr16:27728724:27730651	chr16	27728724	27730651	1928	3.13288	5.15311	9.95298e-17	9.12967e-14
chr16:27773695:27774718	chr16	27773695	27774718	1024	1.62719	3.18	0.000350914	0.00436398
chr16:27780423:27781956	chr16	27780423	27781956	1534	0.822778	4.7683	0.00049455	0.00571336
chr16:28436508:28437838	chr16	28436508	28437838	1331	1.95535	4.07967	1.43315e-07	5.68598e-06
chr16:28813896:28815411	chr16	28813896	28815411	1516	1.14137	4.52062	2.67042e-05	0.000502363
chr16:34833198:34833974	chr16	34833198	34833974	777	1.88089	3.1202	0.000125327	0.0018236
chr16:48952420:48953025	chr16	48952420	48953025	606	2.24639	2.58045	0.000122274	0.00179168
chr16:49004784:49006550	chr16	49004784	49006550	1767	1.95923	4.79608	8.11978e-11	8.6205e-09
chr16:53855184:53856763	chr16	53855184	53856763	1580	0.869435	4.94283	0.000527787	0.00601252
chr16:53861355:53862168	chr16	53861355	53862168	814	2.12806	4.10082	5.03992e-08	2.27511e-06
chr16:53898320:53900079	chr16	53898320	53900079	1760	0.973687	5.5142	9.47593e-07	2.93218e-05
chr16:57411447:57412158	chr16	57411447	57412158	712	2.15443	2.85407	4.76004e-05	0.000804995
chr16:66960911:66962897	chr16	66960911	66962897	1987	1.06246	4.13031	0.000590755	0.0065795
chr16:69206364:69208753	chr16	69206364	69208753	2390	1.6507	5.92849	2.6529e-12	4.82827e-10
chr16:73023053:73024531	chr16	73023053	73024531	1479	0.767279	4.78591	0.000843789	0.00882342
chr16:75353410:75355208	chr16	75353410	75355208	1799	2.08558	3.75432	2.50832e-07	9.17398e-06
chr16:85800946:85802167	chr16	85800946	85802167	1222	1.03212	4.70398	9.54944e-05	0.00145314
chr16:86985429:86986428	chr16	86985429	86986428	1000	1.53964	4.00989	8.91697e-06	0.000196619
chr17:498255:501275	chr17	498255	501275	3021	0.687874	5.6909	0.000208115	0.00279584
chr17:854875:855266	chr17	854875	855266	392	3.35775	2.74189	6.13688e-07	1.99618e-05
chr17:872215:873937	chr17	872215	873937	1723	0.731225	5.07601	0.000571288	0.00641566
chr17:1625780:1626795	chr17	1625780	1626795	1016	1.32856	4.58826	2.47409e-06	6.59718e-05
chr17:15163289:15166835	chr17	15163289	15166835	3547	0.671472	6.21217	3.9833e-05	0.000698352
chr17:15280340:15281436	chr17	15280340	15281436	1097	2.32497	3.57209	1.82271e-07	6.9897e-06
chr17:15393448:15395527	chr17	15393448	15395527	2080	1.62869	5.6462	7.82391e-12	1.21228e-09
chr17:17054092:17056144	chr17	17054092	17056144	2053	1.8837	5.79329	1.39242e-13	3.7715e-11
chr17:17823503:17827593	chr17	17823503	17827593	4091	0.604623	7.31661	5.14564e-05	0.000860057
chr17:17860607:17863478	chr17	17860607	17863478	2872	0.679624	6.91458	8.25473e-06	0.000185041
chr17:17928578:17929475	chr17	17928578	17929475	898	1.64366	3.07558	0.000480116	0.00559168
chr17:29378887:29379925	chr17	29378887	29379925	1039	1.7251	3.38612	8.72751e-05	0.00134865
chr17:36606978:36607987	chr17	36606978	36607987	1010	1.31337	3.90031	6.62649e-05	0.00106863
chr17:38676791:38678546	chr17	38676791	38678546	1756	0.688861	5.4617	0.000411661	0.00496331
chr17:39652357:39653626	chr17	39652357	39653626	1270	0.904524	4.50784	0.000467167	0.00546864
chr17:39809728:39812916	chr17	39809728	39812916	3189	1.23383	5.55142	4.50448e-08	2.07008e-06
chr17:40240385:40240762	chr17	40240385	40240762	378	1.75759	2.91946	0.000373773	0.00459344
chr17:41465103:41467240	chr17	41465103	41467240	2138	0.611012	7.30718	2.58717e-05	0.000488896
chr17:42871923:42874158	chr17	42871923	42874158	2236	0.786287	6.05472	2.65082e-05	0.000499085
chr17:44133850:44135374	chr17	44133850	44135374	1525	1.22608	4.35222	1.89918e-05	0.000378056
chr17:45196260:45199101	chr17	45196260	45199101	2842	0.946411	5.81861	1.05652e-06	3.22611e-05
chr17:45356008:45357382	chr17	45356008	45357382	1375	1.19099	3.98242	0.000228043	0.0030176
chr17:46079661:46080472	chr17	46079661	46080472	812	1.12648	4.50706	2.81947e-05	0.000527374
chr17:46269718:46273352	chr17	46269718	46273352	3635	1.23339	6.26234	6.45786e-10	5.38942e-08
chr17:46547549:46551500	chr17	46547549	46551500	3952	1.48281	7.01249	9.87372e-14	2.86613e-11
chr17:46559001:46568475	chr17	46559001	46568475	9475	1.2474	8.33744	2.76418e-13	6.81594e-11
chr17:47531196:47531835	chr17	47531196	47531835	640	1.32233	3.82252	0.000153611	0.00218118
chr17:48776630:48777191	chr17	48776630	48777191	562	1.28937	3.83155	0.000159883	0.00225586
chr17:55600669:55602517	chr17	55600669	55602517	1849	0.733829	5.20087	0.000361572	0.00446263
chr17:55937171:55942170	chr17	55937171	55942170	5000	1.55891	6.9589	3.25549e-14	1.11425e-11
chr17:55944606:55948362	chr17	55944606	55948362	3757	1.52388	6.66011	1.57252e-13	4.14496e-11
chr17:55950561:55960609	chr17	55950561	55960609	10049	1.20162	8.05638	9.6725e-14	2.84372e-11
chr17:55965682:55973991	chr17	55965682	55973991	8310	0.863704	8.05197	8.59944e-10	6.90413e-08
chr17:55974846:55979104	chr17	55974846	55979104	4259	1.35352	7.01229	4.57726e-13	1.07108e-10
chr17:55979534:55982541	chr17	55979534	55982541	3008	1.22087	6.4098	3.8089e-10	3.3338e-08
chr17:55988645:55993526	chr17	55988645	55993526	4882	1.70163	6.79455	1.74667e-15	1.05407e-12
chr17:55993976:55996347	chr17	55993976	55996347	2372	1.33223	5.77893	3.04843e-10	2.76311e-08
chr17:56003434:56006192	chr17	56003434	56006192	2759	2.31767	6.23221	7.15651e-18	1.36761e-14
chr17:56011859:56016046	chr17	56011859	56016046	4188	2.34211	6.83346	1.55306e-19	3.56147e-16
chr17:56016818:56034673	chr17	56016818	56034673	17856	1.08961	9.80031	8.85563e-15	3.69231e-12
chr17:56062021:56069087	chr17	56062021	56069087	7067	0.855888	7.89384	3.30883e-09	2.21866e-07
chr17:57744754:57747914	chr17	57744754	57747914	3161	0.775377	6.17655	1.62364e-05	0.000331552
chr17:59488504:59490603	chr17	59488504	59490603	2100	1.57322	4.66465	5.86984e-08	2.5886e-06
chr17:59504102:59505033	chr17	59504102	59505033	932	1.13782	3.99605	0.000310959	0.00393972
chr17:59581215:59582737	chr17	59581215	59582737	1523	1.79727	4.77732	4.77274e-09	3.04871e-07
chr17:59644082:59647466	chr17	59644082	59647466	3385	1.27048	6.87779	3.18829e-11	4.03944e-09
chr17:63239624:63240579	chr17	63239624	63240579	956	1.128	4.15956	0.000426297	0.00510754
chr17:63429646:63430837	chr17	63429646	63430837	1192	1.52676	4.03301	4.24754e-06	0.000105645
chr17:63555294:63558307	chr17	63555294	63558307	3014	0.631164	5.70707	0.000697397	0.0075723
chr17:63738065:63739765	chr17	63738065	63739765	1701	1.05665	4.62128	5.71374e-05	0.000942643
chr17:65427118:65428317	chr17	65427118	65428317	1200	0.761398	5.42546	0.000193564	0.00264214
chr17:66230638:66232309	chr17	66230638	66232309	1672	1.64501	4.35335	1.64762e-07	6.42573e-06
chr17:66394396:66396796	chr17	66394396	66396796	2401	0.818716	5.0203	0.000239217	0.00314368
chr17:67603120:67604408	chr17	67603120	67604408	1289	1.58678	3.78887	1.95518e-05	0.000386773
chr17:69419679:69421504	chr17	69419679	69421504	1826	0.634063	5.94669	0.000325031	0.00410215
chr17:69627075:69629110	chr17	69627075	69629110	2036	0.636792	5.4383	0.000711922	0.00768996
chr17:70334035:70336657	chr17	70334035	70336657	2623	0.706646	6.96207	4.66179e-06	0.000113728
chr17:70386325:70388435	chr17	70386325	70388435	2111	0.769967	5.85619	3.95045e-05	0.000694721
chr17:70389392:70391234	chr17	70389392	70391234	1843	0.731883	5.72423	5.84972e-05	0.000962309
chr17:70406669:70408866	chr17	70406669	70408866	2198	0.605352	6.23872	0.000358394	0.00443295
chr17:70567726:70568511	chr17	70567726	70568511	786	1.47214	3.33518	0.00034648	0.0043182
chr17:70598605:70600573	chr17	70598605	70600573	1969	1.29656	6.21016	1.16051e-10	1.17237e-08
chr17:70605038:70606586	chr17	70605038	70606586	1549	1.50772	6.15223	4.08934e-12	7.1043e-10
chr17:70609174:70612333	chr17	70609174	70612333	3160	1.71057	7.44477	2.45498e-17	3.51859e-14
chr17:70618071:70620388	chr17	70618071	70620388	2318	1.47734	6.12613	9.38227e-12	1.43751e-09
chr17:70627128:70628185	chr17	70627128	70628185	1058	1.88787	3.65466	1.96762e-06	5.44287e-05
chr17:70653439:70655460	chr17	70653439	70655460	2022	0.915697	5.85349	1.24116e-06	3.72055e-05
chr17:70656511:70659374	chr17	70656511	70659374	2864	0.823537	7.3235	3.62367e-08	1.71336e-06
chr17:70693694:70696529	chr17	70693694	70696529	2836	1.81028	5.5155	1.16524e-12	2.45149e-10
chr17:70698061:70699547	chr17	70698061	70699547	1487	0.941542	5.10857	2.19864e-05	0.000427645
chr17:73679093:73682474	chr17	73679093	73682474	3382	0.654854	7.81721	7.77684e-06	0.00017605
chr17:73688640:73692618	chr17	73688640	73692618	3979	1.15503	7.05451	5.02628e-10	4.31695e-08
chr17:73701817:73704274	chr17	73701817	73704274	2458	0.70779	5.88963	5.62271e-05	0.000930303
chr17:73865152:73867386	chr17	73865152	73867386	2235	1.39238	5.28281	2.80714e-09	1.91587e-07
chr17:74768617:74769818	chr17	74768617	74769818	1202	0.682578	5.77725	0.000186506	0.00256412
chr17:74998229:74999093	chr17	74998229	74999093	865	1.79903	3.86267	5.21733e-06	0.000125282
chr17:75249758:75252496	chr17	75249758	75252496	2739	0.619607	6.73779	5.33782e-05	0.000887006
chr17:75275377:75276989	chr17	75275377	75276989	1613	0.695041	5.81649	0.00013732	0.00197803
chr17:75389999:75391200	chr17	75389999	75391200	1202	0.936189	4.86121	0.000102343	0.00153394
chr17:76878373:76883329	chr17	76878373	76883329	4957	0.600213	7.58566	8.02407e-06	0.000180754
chr17:79395951:79397951	chr17	79395951	79397951	2001	0.703463	6.44036	4.91343e-05	0.000826667
chr17:80054558:80058401	chr17	80054558	80058401	3844	0.623218	6.32841	0.000179404	0.00248049
chr17:80203969:80205499	chr17	80203969	80205499	1531	0.76229	5.29054	0.000170776	0.00237492
chr17:80289937:80291948	chr17	80289937	80291948	2012	0.650112	5.23445	0.000965984	0.00990252
chr18:2587885:2590440	chr18	2587885	2590440	2556	0.963859	6.04712	2.03382e-06	5.59227e-05
chr18:9016472:9018939	chr18	9016472	9018939	2468	0.688733	6.01746	0.000111059	0.00164735
chr18:9025168:9026254	chr18	9025168	9026254	1087	1.68691	4.24021	4.12253e-07	1.41524e-05
chr18:20393777:20394880	chr18	20393777	20394880	1104	1.58151	4.19109	1.94566e-06	5.40823e-05
chr18:20401502:20402864	chr18	20401502	20402864	1363	1.45804	5.13136	5.64354e-09	3.54569e-07
chr18:21788249:21789118	chr18	21788249	21789118	870	1.23322	4.27526	4.36068e-05	0.000752652
chr18:25423411:25424951	chr18	25423411	25424951	1541	1.32871	3.9488	4.47202e-05	0.000767608
chr18:26733231:26738790	chr18	26733231	26738790	5560	0.853739	6.56153	5.18387e-07	1.71539e-05
chr18:26743218:26746393	chr18	26743218	26746393	3176	0.97329	6.0348	1.11025e-06	3.3633e-05
chr18:47607169:47608569	chr18	47607169	47608569	1401	1.39224	3.99693	3.98632e-05	0.000698352
chr18:55954359:55955281	chr18	55954359	55955281	923	2.05283	3.48876	1.71711e-06	4.86132e-05
chr18:56272502:56273379	chr18	56272502	56273379	878	1.2816	3.66917	0.000456557	0.00537738
chr18:57548821:57549963	chr18	57548821	57549963	1143	0.937364	4.24576	0.0007999	0.00845313
chr18:57552827:57553556	chr18	57552827	57553556	730	1.81019	3.21298	8.55163e-05	0.00132548
chr18:61139038:61140248	chr18	61139038	61140248	1211	1.05628	4.45688	0.000124618	0.00181741
chr18:73201328:73202406	chr18	73201328	73202406	1079	3.18921	3.96552	4.67816e-11	5.50151e-09
chr18:73256152:73256586	chr18	73256152	73256586	435	4.82154	2.25398	8.13356e-07	2.55505e-05
chr18:74776239:74781360	chr18	74776239	74781360	5122	0.72595	6.9536	1.28911e-06	3.8205e-05
chr18:77004874:77006941	chr18	77004874	77006941	2068	0.601155	6.14414	0.000455749	0.00537338
chr18:77217992:77220541	chr18	77217992	77220541	2550	1.49048	5.26564	9.06149e-10	7.19025e-08
chr19:781995:783203	chr19	781995	783203	1209	0.924748	4.46888	0.000430182	0.00514334
chr19:933022:933946	chr19	933022	933946	925	3.65246	2.95304	1.2899e-07	5.1986e-06
chr19:2524806:2526406	chr19	2524806	2526406	1601	0.743785	5.10145	0.000446452	0.00528552
chr19:2578248:2580167	chr19	2578248	2580167	1920	0.814805	4.59722	0.00085599	0.00893879
chr19:3175788:3177618	chr19	3175788	3177618	1831	1.29254	5.77867	1.60401e-09	1.16772e-07
chr19:3396040:3398291	chr19	3396040	3398291	2252	0.774188	5.56531	4.34556e-05	0.000750959
chr19:4057547:4062047	chr19	4057547	4062047	4501	0.6493	5.97094	0.000200175	0.00271534
chr19:4713026:4714756	chr19	4713026	4714756	1731	0.789654	5.45774	8.74266e-05	0.00135008
chr19:6576346:6578237	chr19	6576346	6578237	1892	1.77275	5.02041	1.91334e-09	1.37977e-07
chr19:6610724:6611288	chr19	6610724	6611288	565	1.75447	2.77307	0.000659211	0.00722611
chr19:13142127:13143694	chr19	13142127	13143694	1568	0.850776	4.78026	0.000409287	0.00494248
chr19:13162194:13167939	chr19	13162194	13167939	5746	0.643155	7.9801	1.19807e-06	3.61027e-05
chr19:17422276:17423805	chr19	17422276	17423805	1530	1.13727	4.72458	8.43669e-06	0.000188018
chr19:17585853:17587456	chr19	17585853	17587456	1604	0.696976	5.63137	0.000163063	0.00228707
chr19:19723893:19724891	chr19	19723893	19724891	999	0.826039	5.03839	0.000124664	0.00181741
chr19:21909121:21910420	chr19	21909121	21910420	1300	1.57042	3.97463	1.08642e-05	0.000235257
chr19:34310204:34312319	chr19	34310204	34312319	2116	1.03108	5.34241	1.72314e-06	4.87238e-05
chr19:35809213:35811479	chr19	35809213	35811479	2267	0.768458	5.41394	6.8934e-05	0.00110468
chr19:36095244:36096806	chr19	36095244	36096806	1563	1.804	4.73448	8.61059e-10	6.90413e-08
chr19:36672943:36674399	chr19	36672943	36674399	1457	1.09927	5.22	1.9496e-06	5.41261e-05
chr19:41724251:41726988	chr19	41724251	41726988	2738	0.635258	6.57772	3.41938e-05	0.000617914
chr19:42965650:42966488	chr19	42965650	42966488	839	2.18009	3.36314	4.32776e-06	0.000107407
chr19:47734092:47736603	chr19	47734092	47736603	2512	0.626538	5.91551	0.000245053	0.00320751
chr19:48163762:48164281	chr19	48163762	48164281	520	1.82338	2.88822	0.00030153	0.00384317
chr19:48828043:48829801	chr19	48828043	48829801	1759	0.665013	5.76684	0.000235786	0.00310928
chr2:11343491:11344587	chr2	11343491	11344587	1097	1.50364	3.85829	6.34052e-05	0.00103268
chr2:11379960:11380696	chr2	11379960	11380696	737	1.71799	3.88736	1.19788e-05	0.000254821
chr2:17686789:17689245	chr2	17686789	17689245	2457	1.4396	6.27579	3.87927e-12	6.79079e-10
chr2:17718950:17722624	chr2	17718950	17722624	3675	0.683302	6.85118	8.87043e-06	0.000195781
chr2:17737690:17739721	chr2	17737690	17739721	2032	1.38476	5.13636	1.40254e-08	7.65787e-07
chr2:17758753:17762408	chr2	17758753	17762408	3656	0.735937	6.96515	1.08647e-06	3.30438e-05
chr2:17795702:17797964	chr2	17795702	17797964	2263	1.39853	5.60892	6.26224e-10	5.2991e-08
chr2:19320625:19321785	chr2	19320625	19321785	1161	1.51615	4.38788	4.30882e-07	1.46169e-05
chr2:24238286:24239497	chr2	24238286	24239497	1212	1.15856	3.91309	0.000262358	0.00339526
chr2:26562079:26564075	chr2	26562079	26564075	1997	1.56258	5.37386	7.48222e-10	6.10613e-08
chr2:28021440:28023783	chr2	28021440	28023783	2344	0.862678	5.39304	2.19762e-05	0.000427645
chr2:28614145:28616952	chr2	28614145	28616952	2808	0.678999	5.95522	0.000155022	0.0021985
chr2:28631120:28632642	chr2	28631120	28632642	1523	1.34733	4.65275	1.26006e-06	3.75758e-05
chr2:29329110:29332027	chr2	29329110	29332027	2918	0.932333	5.73053	1.15652e-06	3.49884e-05
chr2:31606638:31608828	chr2	31606638	31608828	2191	0.966107	5.35781	1.30665e-05	0.000274397
chr2:38303057:38305235	chr2	38303057	38305235	2179	0.792349	5.18193	0.000152285	0.00216638
chr2:46172893:46173767	chr2	46172893	46173767	875	0.912969	4.34195	0.000808104	0.00852804
chr2:47211787:47214593	chr2	47211787	47214593	2807	0.646505	6.0956	0.000186812	0.0025668
chr2:47295441:47300825	chr2	47295441	47300825	5385	0.861583	6.94461	3.66632e-08	1.72996e-06
chr2:47301038:47307633	chr2	47301038	47307633	6596	0.746254	7.9801	3.0453e-08	1.47955e-06
chr2:52308770:52311721	chr2	52308770	52311721	2952	1.29814	4.49242	6.00015e-06	0.000140835
chr2:54270363:54272271	chr2	54270363	54272271	1909	1.35091	5.61757	2.31342e-09	1.62734e-07
chr2:54709679:54711160	chr2	54709679	54711160	1482	0.887042	4.91045	0.000407055	0.00493071
chr2:70823121:70825110	chr2	70823121	70825110	1990	0.671464	6.29214	9.07494e-05	0.0013883
chr2:85165225:85166026	chr2	85165225	85166026	802	1.28438	3.73288	0.000254873	0.00331522
chr2:96305714:96309323	chr2	96305714	96309323	3610	0.638899	6.48922	3.98496e-05	0.000698352
chr2:96714563:96716487	chr2	96714563	96716487	1925	1.68562	3.09595	0.000307997	0.00391084
chr2:101396607:101397625	chr2	101396607	101397625	1019	1.86948	3.69457	2.43613e-06	6.52643e-05
chr2:101402281:101403758	chr2	101402281	101403758	1478	2.12618	3.12319	1.79213e-05	0.000361771
chr2:101679364:101683188	chr2	101679364	101683188	3825	2.04984	6.41902	3.91542e-17	4.65236e-14
chr2:106019378:106021653	chr2	106019378	106021653	2276	0.727107	6.28374	2.29581e-05	0.000442416
chr2:109209636:109212037	chr2	109209636	109212037	2402	1.37566	5.71647	4.02256e-10	3.50743e-08
chr2:113975049:113978353	chr2	113975049	113978353	3305	0.767636	5.15465	0.00019053	0.00261005
chr2:114045226:114047335	chr2	114045226	114047335	2110	1.16974	5.87228	2.4667e-08	1.23507e-06
chr2:114735107:114736585	chr2	114735107	114736585	1479	1.1459	4.69097	8.01877e-06	0.000180754
chr2:121671949:121672937	chr2	121671949	121672937	989	1.09589	4.03638	0.0005647	0.00636036
chr2:122391162:122393414	chr2	122391162	122393414	2253	1.25855	5.16306	6.00895e-08	2.6398e-06
chr2:157421057:157422703	chr2	157421057	157422703	1647	2.21331	3.65036	1.03581e-06	3.17134e-05
chr2:157748836:157752044	chr2	157748836	157752044	3209	0.628138	5.91799	0.000393179	0.00478576
chr2:157886766:157890405	chr2	157886766	157890405	3640	1.01412	6.6462	5.3922e-09	3.41586e-07
chr2:157908855:157910861	chr2	157908855	157910861	2007	0.909965	5.39678	9.87241e-06	0.000215408
chr2:157912101:157913373	chr2	157912101	157913373	1273	2.09078	4.38011	8.71728e-10	6.96532e-08
chr2:158029528:158030863	chr2	158029528	158030863	1336	2.00775	3.7028	9.21415e-07	2.87091e-05
chr2:158102605:158104068	chr2	158102605	158104068	1464	0.892749	4.65781	0.000597047	0.00663668
chr2:167990827:167991835	chr2	167990827	167991835	1009	1.86674	3.36213	2.23235e-05	0.000432157
chr2:174915396:174918973	chr2	174915396	174918973	3578	2.17528	5.78505	1.42254e-15	9.06157e-13
chr2:178261216:178263014	chr2	178261216	178263014	1799	0.986782	4.3587	0.000735346	0.00789834
chr2:181155876:181157370	chr2	181155876	181157370	1495	1.13703	4.38547	5.45963e-05	0.000903972
chr2:183814198:183815068	chr2	183814198	183815068	871	2.13941	3.20484	2.32978e-05	0.000447833
chr2:186994228:186996198	chr2	186994228	186996198	1971	0.992573	5.10386	8.96602e-06	0.000197321
chr2:189167616:189169754	chr2	189167616	189169754	2139	1.40828	5.34755	3.69389e-09	2.42717e-07
chr2:189178651:189180558	chr2	189178651	189180558	1908	2.82021	5.13977	7.36662e-16	5.2791e-13
chr2:191701748:191703823	chr2	191701748	191703823	2076	2.12735	4.34006	6.28162e-09	3.89324e-07
chr2:196311711:196313386	chr2	196311711	196313386	1676	2.10733	4.16445	2.78717e-08	1.36864e-06
chr2:201988657:201989225	chr2	201988657	201989225	569	2.56124	3.54591	5.30843e-08	2.36835e-06
chr2:208258832:208260508	chr2	208258832	208260508	1677	1.11363	4.82692	6.86651e-06	0.000157778
chr2:219610449:219611232	chr2	219610449	219611232	784	1.47886	3.66456	4.88191e-05	0.000821968
chr2:220402240:220403348	chr2	220402240	220403348	1109	1.01	4.21587	0.000498677	0.00574946
chr2:224949668:224952364	chr2	224949668	224952364	2697	0.914524	6.23406	3.8251e-06	9.62866e-05
chr2:224969038:224970234	chr2	224969038	224970234	1197	2.28582	4.14883	3.17996e-09	2.1385e-07
chr2:227192294:227192913	chr2	227192294	227192913	620	2.15956	3.62064	5.04923e-07	1.67567e-05
chr2:227199297:227200837	chr2	227199297	227200837	1541	1.3675	4.86528	3.24041e-07	1.14498e-05
chr2:227841027:227843247	chr2	227841027	227843247	2221	0.918317	5.60519	2.0096e-06	5.5323e-05
chr2:230680001:230681221	chr2	230680001	230681221	1221	1.55645	4.22465	2.00957e-06	5.5323e-05
chr2:232468897:232470312	chr2	232468897	232470312	1416	0.660884	5.42471	0.000786209	0.00833534
chr2:234890578:234891681	chr2	234890578	234891681	1104	1.45553	3.40377	0.000486217	0.00565126
chr2:235055980:235057233	chr2	235055980	235057233	1254	2.44685	3.80455	9.29866e-09	5.43972e-07
chr2:235111279:235113098	chr2	235111279	235113098	1820	1.38022	4.96408	5.82108e-08	2.57701e-06
chr2:235149360:235151549	chr2	235149360	235151549	2190	1.54412	4.7715	1.03241e-07	4.27352e-06
chr2:235157834:235161096	chr2	235157834	235161096	3263	2.27054	5.32819	9.42414e-14	2.80668e-11
chr2:235166517:235168273	chr2	235166517	235168273	1757	1.41222	5.01014	3.99803e-08	1.86727e-06
chr2:235270957:235273879	chr2	235270957	235273879	2923	0.934418	5.61529	1.48644e-06	4.30935e-05
chr2:235410598:235411955	chr2	235410598	235411955	1358	2.12568	4.53054	1.66096e-10	1.63472e-08
chr2:236478900:236479467	chr2	236478900	236479467	568	2.60932	2.54484	3.33305e-05	0.000604696
chr2:238407951:238411600	chr2	238407951	238411600	3650	0.656223	6.86248	3.57832e-05	0.000640079
chr2:240166716:240170960	chr2	240166716	240170960	4245	0.767311	6.95975	5.71921e-07	1.87629e-05
chr2:240195003:240198310	chr2	240195003	240198310	3308	0.678757	7.19637	2.82309e-06	7.36508e-05
chr2:241195062:241196448	chr2	241195062	241196448	1387	0.956325	5.12612	1.91668e-05	0.000380548
chr2:241308841:241312870	chr2	241308841	241312870	4030	1.19756	6.40752	2.08539e-10	2.00934e-08
chr2:241372841:241376340	chr2	241372841	241376340	3500	0.713254	6.49496	1.14764e-05	0.000245961
chr20:277878:279838	chr20	277878	279838	1961	0.655482	5.41267	0.000676047	0.00738596
chr20:303961:308633	chr20	303961	308633	4673	0.807671	6.84751	3.76428e-07	1.30594e-05
chr20:523503:525098	chr20	523503	525098	1596	0.799072	5.39464	8.87413e-05	0.0013667
chr20:632377:634932	chr20	632377	634932	2556	0.641925	5.5711	0.000531088	0.00604412
chr20:748275:749790	chr20	748275	749790	1516	1.11346	5.78564	1.49666e-08	8.05666e-07
chr20:813988:815826	chr20	813988	815826	1839	0.686303	5.53335	0.000608738	0.00674702
chr20:862063:863027	chr20	862063	863027	965	1.14586	3.80999	0.000590359	0.00657829
chr20:1396171:1397451	chr20	1396171	1397451	1281	0.854514	4.68768	0.000363811	0.00448544
chr20:2821053:2822148	chr20	2821053	2822148	1096	0.760294	5.13193	0.000286719	0.00368143
chr20:3025730:3027727	chr20	3025730	3027727	1998	1.39537	5.02653	1.68549e-08	8.92646e-07
chr20:3139526:3141473	chr20	3139526	3141473	1948	1.08559	6.14414	1.39403e-08	7.65787e-07
chr20:3183542:3185532	chr20	3183542	3185532	1991	1.0304	6.15465	3.04252e-08	1.47955e-06
chr20:3188966:3191258	chr20	3188966	3191258	2293	1.22931	6.0448	1.16786e-08	6.61267e-07
chr20:3219073:3221547	chr20	3219073	3221547	2475	1.97059	4.98998	3.36524e-11	4.17776e-09
chr20:5590409:5592377	chr20	5590409	5592377	1969	0.90179	5.87984	2.41681e-06	6.49733e-05
chr20:6102590:6104585	chr20	6102590	6104585	1996	0.703696	6.13314	3.96664e-05	0.000696501
chr20:9031885:9033482	chr20	9031885	9033482	1598	0.779947	5.14884	0.00032072	0.00405443
chr20:35271105:35271904	chr20	35271105	35271904	800	1.63259	3.15507	0.000526019	0.00599766
chr20:44406861:44411021	chr20	44406861	44411021	4161	1.14768	6.60198	2.16514e-09	1.53718e-07
chr20:47548716:47550254	chr20	47548716	47550254	1539	1.3916	3.6791	0.000231023	0.00305174
chr20:48754393:48756703	chr20	48754393	48756703	2311	1.09887	5.17629	7.85638e-07	2.48158e-05
chr20:48882509:48885228	chr20	48882509	48885228	2720	0.629034	5.98079	0.000329478	0.00414059
chr20:49982375:49983235	chr20	49982375	49983235	861	2.26116	3.14596	6.07805e-06	0.000142081
chr20:52389132:52392729	chr20	52389132	52392729	3598	0.831019	7.26101	2.24608e-07	8.36156e-06
chr20:52421698:52423709	chr20	52421698	52423709	2012	0.954477	5.43841	2.64896e-06	6.97427e-05
chr20:52517131:52517935	chr20	52517131	52517935	805	1.41823	3.50025	0.000298245	0.0038081
chr20:56591695:56593530	chr20	56591695	56593530	1836	2.01492	4.80006	6.82564e-11	7.41828e-09
chr20:60931942:60935346	chr20	60931942	60935346	3405	1.00915	6.31379	1.47148e-08	7.9585e-07
chr20:61446259:61447722	chr20	61446259	61447722	1464	1.27529	4.98203	1.35464e-07	5.41195e-06
chr20:62317207:62319072	chr20	62317207	62319072	1866	0.89876	5.64268	2.45704e-06	6.56699e-05
chr20:62327299:62329424	chr20	62327299	62329424	2126	0.772739	4.89136	0.000698077	0.00757334
chr20:62329690:62331383	chr20	62329690	62331383	1694	0.717965	5.42205	0.000190754	0.00261157
chr21:27369964:27371193	chr21	27369964	27371193	1230	1.22666	4.48767	9.20948e-06	0.000202291
chr21:27762121:27762743	chr21	27762121	27762743	623	1.63889	3.14669	0.000271996	0.00350614
chr21:32687976:32690983	chr21	32687976	32690983	3008	0.86745	6.66476	1.34747e-07	5.39271e-06
chr21:32931482:32932475	chr21	32931482	32932475	994	0.941977	4.4554	0.000420542	0.00504914
chr21:35917046:35918310	chr21	35917046	35918310	1265	1.70212	4.47538	3.42939e-08	1.62822e-06
chr21:35925094:35926251	chr21	35925094	35926251	1158	2.66231	3.83167	2.21615e-09	1.56854e-07
chr21:36259341:36262594	chr21	36259341	36262594	3254	0.77099	5.99179	5.74481e-05	0.00094687
chr21:36355183:36356040	chr21	36355183	36356040	858	1.1863	3.77072	0.000917176	0.00946992
chr21:36508531:36512509	chr21	36508531	36512509	3979	1.38743	6.83238	9.40287e-12	1.43751e-09
chr21:36522692:36524235	chr21	36522692	36524235	1544	1.70257	4.6025	2.29935e-08	1.15887e-06
chr21:36532078:36532504	chr21	36532078	36532504	427	3.13551	2.55884	5.82177e-06	0.000137209
chr21:36589086:36590912	chr21	36589086	36590912	1827	0.771101	5.1522	0.000267271	0.00345466
chr21:38090866:38092136	chr21	38090866	38092136	1271	0.999896	4.80915	3.68833e-05	0.000656174
chr21:38570558:38572636	chr21	38570558	38572636	2079	1.33289	6.18533	3.52114e-10	3.12972e-08
chr21:38578763:38581436	chr21	38578763	38581436	2674	1.43529	5.84329	1.0271e-10	1.06096e-08
chr21:41001947:41003541	chr21	41001947	41003541	1595	1.2717	4.82863	4.68719e-07	1.56878e-05
chr21:41004417:41007233	chr21	41004417	41007233	2817	1.34327	5.98798	4.94914e-10	4.28278e-08
chr21:43061838:43063132	chr21	43061838	43063132	1295	2.73937	3.43009	3.4638e-07	1.21455e-05
chr21:44581577:44582606	chr21	44581577	44582606	1030	1.18676	3.72062	0.000539367	0.00611407
chr21:47393155:47395918	chr21	47393155	47395918	2764	0.81218	6.19865	3.15812e-06	8.10996e-05
chr21:47874964:47876361	chr21	47874964	47876361	1398	1.90798	4.47547	1.38065e-08	7.61085e-07
chr22:19867991:19869758	chr22	19867991	19869758	1768	0.841384	5.36881	2.87836e-05	0.000537076
chr22:22296794:22297617	chr22	22296794	22297617	824	1.40377	4.11277	1.99963e-05	0.000392971
chr22:25515109:25517456	chr22	25515109	25517456	2348	0.828861	6.15074	4.73333e-06	0.000115106
chr22:28065048:28068044	chr22	28065048	28068044	2997	0.647548	6.38446	4.07741e-05	0.000712133
chr22:30015692:30020845	chr22	30015692	30020845	5154	0.647941	7.78742	9.48752e-07	2.93218e-05
chr22:30589945:30594925	chr22	30589945	30594925	4981	0.862562	7.59321	1.84594e-08	9.57719e-07
chr22:30599475:30611806	chr22	30599475	30611806	12332	0.642657	9.01891	1.49576e-07	5.89359e-06
chr22:30618662:30626322	chr22	30618662	30626322	7661	0.855674	8.03464	1.23769e-09	9.2754e-08
chr22:30630470:30633558	chr22	30630470	30633558	3089	1.141	6.32676	2.27643e-09	1.60625e-07
chr22:30634255:30635881	chr22	30634255	30635881	1627	1.1755	5.40326	9.42976e-08	3.93169e-06
chr22:30640298:30650875	chr22	30640298	30650875	10578	0.774881	8.27044	7.12385e-09	4.35638e-07
chr22:30651166:30655003	chr22	30651166	30655003	3838	0.609444	7.7999	8.38125e-06	0.000187147
chr22:31225564:31227424	chr22	31225564	31227424	1861	0.721857	5.36498	0.000504308	0.0057998
chr22:35822099:35823280	chr22	35822099	35823280	1182	1.02203	4.51324	7.92893e-05	0.00124198
chr22:38290238:38293458	chr22	38290238	38293458	3221	0.709057	6.00198	3.46485e-05	0.000623588
chr22:38293496:38295731	chr22	38293496	38295731	2236	1.85892	5.42447	4.14623e-12	7.14897e-10
chr22:38300544:38303509	chr22	38300544	38303509	2966	1.11417	5.78554	1.95963e-08	1.00533e-06
chr22:39492883:39494982	chr22	39492883	39494982	2100	0.787499	4.78119	0.00067486	0.00738002
chr22:39693230:39694910	chr22	39693230	39694910	1681	0.821289	5.04383	0.000194512	0.0026534
chr22:42557308:42558022	chr22	42557308	42558022	715	1.43711	3.2222	0.000822286	0.00864192
chr22:43030761:43032717	chr22	43030761	43032717	1957	0.854033	5.61092	1.8842e-05	0.000376708
chr22:45945025:45945589	chr22	45945025	45945589	565	1.66652	2.81587	0.00091789	0.00947207
chr22:50342425:50343778	chr22	50342425	50343778	1354	1.65678	4.5776	6.04566e-08	2.65084e-06
chr3:5035102:5038634	chr3	5035102	5038634	3533	0.885534	6.9985	5.11296e-08	2.29903e-06
chr3:5054645:5055453	chr3	5054645	5055453	809	1.06905	4.21924	0.000490096	0.00568194
chr3:11609324:11611353	chr3	11609324	11611353	2030	0.632709	5.69216	0.000493351	0.00570814
chr3:11641845:11642515	chr3	11641845	11642515	671	1.60333	3.40514	0.000174313	0.0024197
chr3:13040535:13041415	chr3	13040535	13041415	881	1.04673	4.08525	0.000943425	0.00969119
chr3:15671731:15673540	chr3	15671731	15673540	1810	0.747234	5.88113	3.65365e-05	0.000652028
chr3:15686577:15690557	chr3	15686577	15690557	3981	0.73535	7.24097	1.25202e-06	3.74334e-05
chr3:15696525:15697180	chr3	15696525	15697180	656	2.7952	3.12421	1.09049e-06	3.3122e-05
chr3:30749044:30750361	chr3	30749044	30750361	1318	2.59155	4.20521	1.1072e-10	1.12346e-08
chr3:32448089:32448769	chr3	32448089	32448769	681	1.73559	2.91888	0.000325601	0.00410397
chr3:32510234:32512262	chr3	32510234	32512262	2029	0.725372	5.65013	6.2992e-05	0.00102741
chr3:33401337:33402325	chr3	33401337	33402325	989	1.52804	4.87964	1.36144e-08	7.54121e-07
chr3:36403554:36405044	chr3	36403554	36405044	1491	1.30626	3.50628	0.000458987	0.00539492
chr3:37224413:37225553	chr3	37224413	37225553	1141	0.92858	4.39017	0.000775286	0.00824586
chr3:37239001:37239916	chr3	37239001	37239916	916	1.41033	3.56605	0.000408082	0.00493714
chr3:37976326:37978947	chr3	37976326	37978947	2622	0.882997	6.09814	9.45751e-07	2.9308e-05
chr3:41548565:41550184	chr3	41548565	41550184	1620	1.23123	3.90888	0.000407237	0.00493071
chr3:42102953:42106152	chr3	42102953	42106152	3200	0.648347	6.47937	7.5782e-05	0.00119851
chr3:45007778:45009218	chr3	45007778	45009218	1441	0.647498	5.55254	0.000513854	0.00588891
chr3:46557507:46559757	chr3	46557507	46559757	2251	0.824746	5.53572	1.44146e-05	0.000300232
chr3:46984583:46986191	chr3	46984583	46986191	1609	1.2891	4.42786	7.3559e-06	0.000167679
chr3:46987896:46991078	chr3	46987896	46991078	3183	0.778831	5.65455	3.46232e-05	0.000623588
chr3:48600541:48602297	chr3	48600541	48602297	1757	0.808668	5.02495	0.000339767	0.00423914
chr3:49302149:49304094	chr3	49302149	49304094	1946	0.992763	5.565	1.44158e-06	4.19521e-05
chr3:49502370:49503960	chr3	49502370	49503960	1591	0.788988	5.04144	0.000259831	0.00337207
chr3:49521656:49523565	chr3	49521656	49523565	1910	0.997341	4.92303	1.8911e-05	0.000377758
chr3:49537759:49538911	chr3	49537759	49538911	1153	0.996862	5.40149	3.79492e-05	0.000670973
chr3:49556577:49557474	chr3	49556577	49557474	898	2.35567	3.20963	3.2888e-06	8.40788e-05
chr3:52079326:52082810	chr3	52079326	52082810	3485	0.964095	5.48247	1.62667e-06	4.63027e-05
chr3:58859912:58861223	chr3	58859912	58861223	1312	1.47716	4.37292	4.8975e-06	0.00011872
chr3:62903303:62904847	chr3	62903303	62904847	1545	1.49102	3.38977	0.00050225	0.00578193
chr3:62906190:62909724	chr3	62906190	62909724	3535	1.55087	4.46013	1.08336e-06	3.29927e-05
chr3:62925049:62927598	chr3	62925049	62927598	2550	1.20941	3.88099	0.000379031	0.00464065
chr3:62953703:62954419	chr3	62953703	62954419	717	2.92577	2.78405	3.23587e-06	8.2818e-05
chr3:102017620:102018816	chr3	102017620	102018816	1197	1.16198	4.21395	0.000294383	0.00376719
chr3:106446506:106448501	chr3	106446506	106448501	1996	2.4929	4.83644	2.13376e-13	5.43681e-11
chr3:106484041:106484712	chr3	106484041	106484712	672	1.41251	3.36044	0.00083922	0.00878365
chr3:111299458:111302284	chr3	111299458	111302284	2827	0.660897	6.1012	0.000172918	0.00240179
chr3:111303212:111305681	chr3	111303212	111305681	2470	0.655083	6.37725	0.000117062	0.00172524
chr3:111307043:111310211	chr3	111307043	111310211	3169	1.22755	6.25468	2.16299e-10	2.06608e-08
chr3:111312949:111314799	chr3	111312949	111314799	1851	1.08369	5.11531	1.19625e-06	3.60953e-05
chr3:111328425:111330867	chr3	111328425	111330867	2443	1.03589	5.66286	1.21221e-07	4.90274e-06
chr3:111414265:111415136	chr3	111414265	111415136	872	1.3276	3.52931	0.000728013	0.00783027
chr3:111674948:111676867	chr3	111674948	111676867	1920	1.43989	5.53997	7.65475e-10	6.22478e-08
chr3:112109492:112110816	chr3	112109492	112110816	1325	1.42571	3.87005	6.91267e-05	0.00110699
chr3:114098722:114099769	chr3	114098722	114099769	1048	1.54217	3.99298	6.82268e-06	0.000156928
chr3:115507375:115510388	chr3	115507375	115510388	3014	0.737336	5.72083	0.000106518	0.00158924
chr3:126629472:126631227	chr3	126629472	126631227	1756	1.42055	5.0231	3.10592e-08	1.49319e-06
chr3:130682137:130683114	chr3	130682137	130683114	978	2.027	4.89376	5.8668e-11	6.59497e-09
chr3:133919458:133922004	chr3	133919458	133922004	2547	0.883539	6.58944	1.29884e-07	5.2163e-06
chr3:136537160:136538661	chr3	136537160	136538661	1502	0.962521	4.2962	0.00052051	0.00594735
chr3:149050508:149051852	chr3	149050508	149051852	1345	1.59626	4.12619	2.91438e-06	7.5774e-05
chr3:149272234:149273164	chr3	149272234	149273164	931	1.82293	3.83897	1.60881e-06	4.6059e-05
chr3:149319998:149324248	chr3	149319998	149324248	4251	1.19993	6.37685	2.63656e-10	2.44784e-08
chr3:156804883:156807532	chr3	156804883	156807532	2650	0.610967	6.0512	0.000216721	0.0028945
chr3:158875893:158876883	chr3	158875893	158876883	991	1.14639	3.70916	0.000886805	0.00921363
chr3:159572018:159572824	chr3	159572018	159572824	807	1.55344	3.42349	0.000209864	0.00281438
chr3:167742037:167742898	chr3	167742037	167742898	862	1.26221	3.6394	0.000514986	0.00589598
chr3:167788494:167790556	chr3	167788494	167790556	2063	0.842806	5.28019	5.914e-05	0.000971488
chr3:170874112:170875034	chr3	170874112	170875034	923	1.51739	4.08403	4.03527e-06	0.000101023
chr3:170909864:170911143	chr3	170909864	170911143	1280	1.02467	4.96216	9.22187e-06	0.000202369
chr3:171064355:171066513	chr3	171064355	171066513	2159	0.931227	5.67645	1.84084e-06	5.1733e-05
chr3:171068816:171075328	chr3	171068816	171075328	6513	0.700112	7.80878	2.89334e-07	1.03997e-05
chr3:171526597:171528776	chr3	171526597	171528776	2180	0.705304	5.36718	0.000437547	0.00520426
chr3:171870437:171871939	chr3	171870437	171871939	1503	0.698501	5.1179	0.000867338	0.0090367
chr3:174428503:174429296	chr3	174428503	174429296	794	1.32586	3.34935	0.000857583	0.00895134
chr3:175455352:175456468	chr3	175455352	175456468	1117	1.46341	4.052	1.02972e-05	0.000223826
chr3:182081503:182084383	chr3	182081503	182084383	2881	1.58322	5.89874	1.94853e-12	3.72365e-10
chr3:188011971:188014034	chr3	188011971	188014034	2064	0.602539	5.94493	0.000571776	0.00641799
chr3:188065804:188067716	chr3	188065804	188067716	1913	0.990173	5.27114	4.29834e-06	0.000106792
chr3:188617692:188619545	chr3	188617692	188619545	1854	0.891288	4.93184	0.000334041	0.00418592
chr3:192596257:192598225	chr3	192596257	192598225	1969	0.642462	5.87955	0.000258362	0.0033568
chr3:192600860:192605906	chr3	192600860	192605906	5047	1.2459	6.89251	3.28899e-11	4.14413e-09
chr3:192610369:192611527	chr3	192610369	192611527	1159	1.0068	4.34348	0.000404295	0.00490804
chr3:192634294:192636335	chr3	192634294	192636335	2042	0.831627	4.7605	0.000668511	0.00732106
chr3:193586662:193589024	chr3	193586662	193589024	2363	0.705173	5.50492	0.000192923	0.00263653
chr3:193851551:193853908	chr3	193851551	193853908	2358	1.20642	5.04381	6.97975e-05	0.00111543
chr3:197121292:197122511	chr3	197121292	197122511	1220	2.02997	3.80965	4.4548e-07	1.50897e-05
chr3:197205066:197206303	chr3	197205066	197206303	1238	1.25583	4.07279	4.86305e-05	0.000819394
chr3:197216715:197217913	chr3	197216715	197217913	1199	1.60323	4.83597	6.97199e-09	4.27491e-07
chr3:197226052:197227224	chr3	197226052	197227224	1173	1.51548	4.8	1.4862e-07	5.86601e-06
chr3:197228481:197229251	chr3	197228481	197229251	771	1.8743	2.884	0.000389016	0.00474265
chr4:1297438:1300462	chr4	1297438	1300462	3025	0.83006	5.53411	1.44496e-05	0.000300416
chr4:1330845:1332272	chr4	1330845	1332272	1428	1.34951	4.07379	3.05392e-05	0.000561158
chr4:3939575:3941161	chr4	3939575	3941161	1587	1.10019	3.9782	0.000588962	0.00656828
chr4:4428560:4430666	chr4	4428560	4430666	2107	3.64647	5.70354	1.78531e-20	8.18815e-17
chr4:4587041:4587797	chr4	4587041	4587797	757	1.82422	2.62929	0.000728325	0.00783027
chr4:4668461:4669279	chr4	4668461	4669279	819	1.36193	3.53275	0.000327568	0.00412509
chr4:4674222:4675230	chr4	4674222	4675230	1009	1.41071	4.44567	9.18357e-07	2.86527e-05
chr4:4713578:4715424	chr4	4713578	4715424	1847	1.40418	4.55752	6.71267e-07	2.15595e-05
chr4:4754818:4755528	chr4	4754818	4755528	711	1.68731	2.9656	0.000785501	0.00833534
chr4:10107965:10108937	chr4	10107965	10108937	973	1.3188	3.98844	5.25998e-05	0.000875975
chr4:15690425:15693588	chr4	15690425	15693588	3164	0.892253	6.28868	9.40052e-07	2.91709e-05
chr4:15906202:15909776	chr4	15906202	15909776	3575	0.714752	6.58581	5.61057e-06	0.00013319
chr4:19776127:19779758	chr4	19776127	19779758	3632	0.634843	6.09717	0.000126197	0.00183393
chr4:31235063:31241749	chr4	31235063	31241749	6687	0.674081	6.60731	4.96721e-05	0.000834491
chr4:33924765:33927711	chr4	33924765	33927711	2947	0.918406	5.55955	2.61511e-06	6.91691e-05
chr4:36552169:36554533	chr4	36552169	36554533	2365	1.68997	5.12074	3.78166e-10	3.32265e-08
chr4:37322099:37324704	chr4	37322099	37324704	2606	2.52506	5.33393	2.02275e-15	1.10445e-12
chr4:38130114:38131288	chr4	38130114	38131288	1175	2.27395	3.54968	4.16199e-07	1.42452e-05
chr4:41143834:41150913	chr4	41143834	41150913	7080	0.674588	8.02338	2.23895e-07	8.34856e-06
chr4:75133352:75135462	chr4	75133352	75135462	2111	0.678879	5.88729	0.000158213	0.00223684
chr4:77702422:77705429	chr4	77702422	77705429	3008	1.11237	6.471	2.97724e-09	2.01398e-07
chr4:79452746:79459161	chr4	79452746	79459161	6416	0.600899	7.84377	6.92029e-06	0.000158696
chr4:79462386:79467952	chr4	79462386	79467952	5567	0.661973	8.13575	4.65415e-07	1.56265e-05
chr4:83706454:83707652	chr4	83706454	83707652	1199	1.07223	4.62483	2.57231e-05	0.000488314
chr4:84109987:84111845	chr4	84109987	84111845	1859	1.57909	4.64333	3.68572e-08	1.73555e-06
chr4:84771643:84773971	chr4	84771643	84773971	2329	0.732072	5.73049	4.84235e-05	0.000817107
chr4:90601617:90603096	chr4	90601617	90603096	1480	1.26699	4.47664	4.69355e-06	0.000114381
chr4:91166442:91169737	chr4	91166442	91169737	3296	3.09639	5.27756	2.64041e-17	3.56176e-14
chr4:93155023:93156721	chr4	93155023	93156721	1699	1.36466	3.50255	0.000457838	0.00538693
chr4:95465086:95467566	chr4	95465086	95467566	2481	1.1295	5.98618	8.93471e-09	5.28069e-07
chr4:95468311:95470843	chr4	95468311	95470843	2533	0.708747	6.29668	2.23468e-05	0.000432157
chr4:95562080:95564064	chr4	95562080	95564064	1985	1.56621	5.19302	4.51758e-09	2.89377e-07
chr4:96225554:96226675	chr4	96225554	96226675	1122	2.05459	3.55831	3.84579e-06	9.67013e-05
chr4:96425335:96428161	chr4	96425335	96428161	2827	2.4701	5.56058	7.3975e-15	3.20075e-12
chr4:96431107:96433114	chr4	96431107	96433114	2008	1.91147	5.26035	6.50311e-12	1.04286e-09
chr4:99443317:99445763	chr4	99443317	99445763	2447	0.776407	5.46742	5.42157e-05	0.00089832
chr4:101939653:101945139	chr4	101939653	101945139	5487	0.619836	8.39798	1.30224e-06	3.85329e-05
chr4:102226616:102228220	chr4	102226616	102228220	1605	1.19482	4.45761	2.56388e-05	0.000487519
chr4:105981678:105983373	chr4	105981678	105983373	1696	1.52876	4.61147	9.33791e-08	3.90049e-06
chr4:114062384:114063752	chr4	114062384	114063752	1369	1.09661	4.71636	1.91338e-05	0.000380313
chr4:114276768:114277444	chr4	114276768	114277444	677	1.22589	3.82289	0.000226339	0.00300196
chr4:114304377:114305268	chr4	114304377	114305268	892	2.42904	3.10188	8.85455e-06	0.000195619
chr4:114356850:114357899	chr4	114356850	114357899	1050	0.885469	4.49545	0.000829663	0.00869554
chr4:114364594:114370400	chr4	114364594	114370400	5807	1.23778	7.6726	7.10852e-13	1.56743e-10
chr4:114374303:114375019	chr4	114374303	114375019	717	1.8165	3.74662	2.30876e-06	6.23391e-05
chr4:114386295:114391398	chr4	114386295	114391398	5104	1.38314	7.57558	4.65603e-14	1.46263e-11
chr4:114394779:114396155	chr4	114394779	114396155	1377	2.39834	4.63245	1.29438e-11	1.87865e-09
chr4:114486075:114486781	chr4	114486075	114486781	707	2.05454	3.08828	4.22283e-05	0.000733065
chr4:114878910:114882640	chr4	114878910	114882640	3731	1.1741	6.08882	9.1379e-09	5.37308e-07
chr4:114899642:114901500	chr4	114899642	114901500	1859	1.19707	4.2971	4.14439e-05	0.000721556
chr4:114936186:114937730	chr4	114936186	114937730	1545	2.116	4.01547	2.70375e-08	1.33842e-06
chr4:123704262:123705792	chr4	123704262	123705792	1531	0.974687	4.57301	0.00035032	0.00435894
chr4:123718976:123720109	chr4	123718976	123720109	1134	1.42254	4.01271	2.9672e-05	0.000549627
chr4:139268143:139270265	chr4	139268143	139270265	2123	1.66695	5.61445	4.23892e-12	7.25426e-10
chr4:143012012:143015009	chr4	143012012	143015009	2998	1.7696	5.49342	5.25341e-12	8.66699e-10
chr4:143016770:143017766	chr4	143016770	143017766	997	0.807201	4.72756	0.000759909	0.00811655
chr4:143299094:143302305	chr4	143299094	143302305	3212	1.10411	6.63031	6.33874e-10	5.32454e-08
chr4:143316686:143319626	chr4	143316686	143319626	2941	0.777088	5.70486	2.24069e-05	0.000432157
chr4:143468745:143474295	chr4	143468745	143474295	5551	0.684627	7.38738	5.74535e-06	0.000135967
chr4:143640893:143643668	chr4	143640893	143643668	2776	0.887693	6.09328	1.37403e-06	4.03447e-05
chr4:143736112:143741551	chr4	143736112	143741551	5440	0.650038	7.38796	1.1356e-05	0.000243728
chr4:143765723:143768555	chr4	143765723	143768555	2833	1.2011	4.82658	7.79531e-06	0.000176294
chr4:144688823:144690269	chr4	144688823	144690269	1447	0.830771	4.54752	0.000801109	0.00846201
chr4:145630075:145631811	chr4	145630075	145631811	1737	1.23708	5.14116	1.62012e-06	4.63027e-05
chr4:146653988:146656242	chr4	146653988	146656242	2255	0.892148	4.65568	0.000221134	0.00293973
chr4:148260825:148262560	chr4	148260825	148262560	1736	1.61666	4.73032	1.00555e-08	5.80836e-07
chr4:153179012:153181237	chr4	153179012	153181237	2226	1.71817	5.0264	1.30677e-09	9.698e-08
chr4:153617742:153619077	chr4	153617742	153619077	1336	2.46419	4.69821	1.71652e-11	2.35708e-09
chr4:155628326:155629730	chr4	155628326	155629730	1405	1.75952	5.18794	9.4411e-11	9.84106e-09
chr4:155639236:155641816	chr4	155639236	155641816	2581	1.02075	5.25287	5.05069e-06	0.000121918
chr4:157243455:157244201	chr4	157243455	157244201	747	1.99411	3.08896	3.6935e-05	0.000656583
chr4:157244754:157245529	chr4	157244754	157245529	776	1.88804	3.39342	2.44353e-05	0.000466958
chr4:157267287:157269627	chr4	157267287	157269627	2341	1.14314	5.48587	4.69102e-08	2.13866e-06
chr4:157593727:157594816	chr4	157593727	157594816	1090	1.6347	3.3107	0.000113263	0.00167788
chr4:157672229:157673557	chr4	157672229	157673557	1329	2.01882	4.07156	6.6177e-08	2.86876e-06
chr4:157684166:157686798	chr4	157684166	157686798	2633	1.95041	4.62591	6.73389e-09	4.13999e-07
chr4:157691476:157693613	chr4	157691476	157693613	2138	1.44263	5.63768	3.06788e-10	2.76978e-08
chr4:157694726:157696292	chr4	157694726	157696292	1567	1.658	4.78823	2.58565e-09	1.77527e-07
chr4:157700142:157702389	chr4	157700142	157702389	2248	1.4308	5.04829	1.28798e-08	7.16893e-07
chr4:157711961:157712390	chr4	157711961	157712390	430	2.94328	3.12816	1.98269e-07	7.48368e-06
chr4:157851537:157853176	chr4	157851537	157853176	1640	1.24055	5.49907	4.41974e-08	2.0393e-06
chr4:157865925:157870212	chr4	157865925	157870212	4288	1.77603	5.95324	6.41142e-14	1.98685e-11
chr4:168816737:168819221	chr4	168816737	168819221	2485	1.30918	4.46065	4.01849e-06	0.000100712
chr4:174112072:174114323	chr4	174112072	174114323	2252	0.649738	5.51353	0.000826697	0.00867238
chr4:186225824:186229214	chr4	186225824	186229214	3391	1.17032	5.93857	1.82367e-08	9.4831e-07
chr4:187578298:187579884	chr4	187578298	187579884	1587	1.33859	4.47594	4.10072e-06	0.000102438
chr5:1160844:1162289	chr5	1160844	1162289	1446	1.44455	5.09546	1.19435e-08	6.71293e-07
chr5:1326347:1329326	chr5	1326347	1329326	2980	0.764455	5.58806	9.00038e-05	0.0013788
chr5:10563017:10564845	chr5	10563017	10564845	1829	0.841423	4.91937	0.000385461	0.0047018
chr5:10701668:10707012	chr5	10701668	10707012	5345	0.692982	7.31131	2.7901e-06	7.29563e-05
chr5:10723482:10727563	chr5	10723482	10727563	4082	0.959721	7.06238	2.5758e-09	1.77382e-07
chr5:14034997:14039956	chr5	14034997	14039956	4960	0.642542	7.34821	7.06443e-06	0.000161678
chr5:14189914:14191580	chr5	14189914	14191580	1667	0.996642	5.09938	1.08188e-05	0.000234495
chr5:16803433:16804492	chr5	16803433	16804492	1060	0.906307	4.63231	0.000456922	0.00537892
chr5:16893942:16896064	chr5	16893942	16896064	2123	0.667014	6.10592	6.97995e-05	0.00111543
chr5:37506489:37507500	chr5	37506489	37507500	1012	1.55356	3.77043	1.89711e-05	0.000377971
chr5:45793718:45794697	chr5	45793718	45794697	980	1.88374	3.8513	7.59465e-07	2.40221e-05
chr5:56990576:56992179	chr5	56990576	56992179	1604	0.774289	5.10505	0.000281903	0.00362365
chr5:57118616:57122119	chr5	57118616	57122119	3504	1.19248	7.03625	2.46838e-11	3.19802e-09
chr5:57130470:57132545	chr5	57130470	57132545	2076	2.29576	5.18932	9.11767e-14	2.75114e-11
chr5:57136369:57139727	chr5	57136369	57139727	3359	1.2692	6.57338	6.79376e-11	7.41828e-09
chr5:61739156:61739780	chr5	61739156	61739780	625	1.46457	3.27009	0.000635032	0.00699786
chr5:71552379:71553284	chr5	71552379	71553284	906	1.24843	4.04345	7.98879e-05	0.0012505
chr5:72665840:72667990	chr5	72665840	72667990	2151	0.852113	5.41738	1.83338e-05	0.00036816
chr5:78995609:78996372	chr5	78995609	78996372	764	2.07195	3.16107	1.72622e-05	0.000350316
chr5:82030303:82031940	chr5	82030303	82031940	1638	0.636649	5.51736	0.000575479	0.00645009
chr5:91839769:91841178	chr5	91839769	91841178	1410	1.13804	4.21183	0.000113708	0.00168121
chr5:93553751:93554618	chr5	93553751	93554618	868	1.87362	3.3269	4.43428e-05	0.00076227
chr5:93576154:93577503	chr5	93576154	93577503	1350	2.00687	4.07856	5.86018e-08	2.5886e-06
chr5:94927019:94927735	chr5	94927019	94927735	717	2.1442	3.30099	5.75807e-06	0.000136128
chr5:95361438:95362910	chr5	95361438	95362910	1473	1.97528	3.76017	3.87002e-07	1.33656e-05
chr5:97644846:97646220	chr5	97644846	97646220	1375	1.35227	4.16881	3.0183e-05	0.000557741
chr5:102273071:102273911	chr5	102273071	102273911	841	1.26239	4.10019	0.000136111	0.00196308
chr5:103680344:103681369	chr5	103680344	103681369	1026	1.48747	3.45833	0.00017945	0.00248049
chr5:104245976:104247045	chr5	104245976	104247045	1070	2.3598	3.67007	3.75769e-08	1.7658e-06
chr5:112355511:112357831	chr5	112355511	112357831	2321	0.826653	6.01024	4.06035e-06	0.00010154
chr5:112382893:112383417	chr5	112382893	112383417	525	1.63867	3.13059	0.000241399	0.00316812
chr5:112502151:112504121	chr5	112502151	112504121	1971	0.751512	5.22756	0.000192087	0.00262825
chr5:114795387:114798611	chr5	114795387	114798611	3225	1.34659	5.81119	3.4441e-09	2.28928e-07
chr5:118638684:118639531	chr5	118638684	118639531	848	1.6637	3.42131	6.13821e-05	0.00100544
chr5:124464859:124465556	chr5	124464859	124465556	698	1.4644	3.78296	3.41934e-05	0.000617914
chr5:124469539:124471216	chr5	124469539	124471216	1678	1.54422	4.40206	2.61197e-07	9.4925e-06
chr5:125689030:125691662	chr5	125689030	125691662	2633	0.618082	5.88982	0.000303361	0.00385839
chr5:125781101:125782950	chr5	125781101	125782950	1850	0.918163	4.73837	0.000262184	0.00339526
chr5:130958220:130959137	chr5	130958220	130959137	918	1.68494	3.22942	0.000156997	0.00222238
chr5:133389150:133390781	chr5	133389150	133390781	1632	2.42903	4.65324	5.95675e-12	9.68796e-10
chr5:133394146:133395386	chr5	133394146	133395386	1241	1.27532	4.37013	3.253e-05	0.000591577
chr5:139113140:139113879	chr5	139113140	139113879	740	2.20804	2.79419	9.58032e-05	0.0014559
chr5:139256474:139257591	chr5	139256474	139257591	1118	1.22157	4.3386	3.2196e-05	0.00058752
chr5:140893548:140895381	chr5	140893548	140895381	1834	1.38583	4.50448	1.59286e-06	4.57164e-05
chr5:140899206:140903054	chr5	140899206	140903054	3849	0.76184	7.48823	3.17996e-07	1.12884e-05
chr5:142023385:142025348	chr5	142023385	142025348	1964	0.981365	5.44934	2.4367e-06	6.52643e-05
chr5:148289442:148291059	chr5	148289442	148291059	1618	1.62067	5.01765	8.12627e-09	4.86558e-07
chr5:148291667:148294415	chr5	148291667	148294415	2749	1.53947	5.8832	4.34534e-11	5.21714e-09
chr5:148381496:148382076	chr5	148381496	148382076	581	1.78671	2.81251	0.000516935	0.00591474
chr5:148441163:148443624	chr5	148441163	148443624	2462	0.629412	6.65715	4.05313e-05	0.000708433
chr5:151073121:151074916	chr5	151073121	151074916	1796	1.44821	4.5649	3.43782e-07	1.20904e-05
chr5:151118935:151121784	chr5	151118935	151121784	2850	1.39645	6.27334	1.80765e-11	2.43845e-09
chr5:151124019:151127140	chr5	151124019	151127140	3122	1.30739	6.47014	2.66972e-10	2.46151e-08
chr5:153744235:153750881	chr5	153744235	153750881	6647	0.999715	7.74711	7.91972e-11	8.44721e-09
chr5:157029655:157031927	chr5	157029655	157031927	2273	0.759766	5.42028	0.00020175	0.0027263
chr5:158605619:158607243	chr5	158605619	158607243	1625	0.86727	5.04849	9.97423e-05	0.00150282
chr5:159008346:159010978	chr5	159008346	159010978	2633	0.607066	6.35512	0.000566128	0.00637018
chr5:171537922:171538883	chr5	171537922	171538883	962	2.73124	3.0551	2.67288e-06	7.02918e-05
chr5:174770811:174772354	chr5	174770811	174772354	1544	1.23937	5.44921	1.94749e-08	1.00134e-06
chr5:174773346:174774494	chr5	174773346	174774494	1149	1.66852	4.54647	3.23399e-08	1.54827e-06
chr5:174804476:174807280	chr5	174804476	174807280	2805	0.821455	6.79462	1.00129e-06	3.08623e-05
chr5:174845200:174845722	chr5	174845200	174845722	523	2.22286	2.58898	0.000214167	0.00286205
chr5:174944447:174945322	chr5	174944447	174945322	876	1.21756	3.56055	0.000761122	0.00812572
chr6:1199698:1202044	chr6	1199698	1202044	2347	1.10898	5.56762	9.28645e-08	3.88607e-06
chr6:1724114:1725874	chr6	1724114	1725874	1761	0.63944	5.67402	0.000764897	0.00815463
chr6:6790774:6791965	chr6	6790774	6791965	1192	1.56509	3.963	7.09568e-06	0.000162231
chr6:7691445:7693117	chr6	7691445	7693117	1673	0.937249	5.12293	1.4447e-05	0.000300416
chr6:13923817:13925199	chr6	13923817	13925199	1383	1.05513	3.97802	0.000665966	0.00729667
chr6:13953000:13953864	chr6	13953000	13953864	865	1.5354	3.58984	8.9581e-05	0.00137658
chr6:14000820:14002653	chr6	14000820	14002653	1834	1.13067	5.00629	1.4408e-06	4.19521e-05
chr6:14270470:14273031	chr6	14270470	14273031	2562	0.949001	6.21696	2.15162e-07	8.04909e-06
chr6:14731698:14737055	chr6	14731698	14737055	5358	0.686225	6.51458	4.10423e-05	0.000715893
chr6:30730774:30733176	chr6	30730774	30733176	2403	1.33753	6.43305	6.14269e-11	6.80503e-09
chr6:31304780:31305414	chr6	31304780	31305414	635	1.65196	3.16309	0.000288052	0.00369648
chr6:35330349:35332240	chr6	35330349	35332240	1892	0.999292	5.892	2.12415e-07	7.97234e-06
chr6:36634002:36636031	chr6	36634002	36636031	2030	1.10296	5.2914	1.40407e-06	4.10691e-05
chr6:36643737:36649086	chr6	36643737	36649086	5350	1.13197	6.55622	6.2987e-10	5.31036e-08
chr6:36915546:36916473	chr6	36915546	36916473	928	1.70309	3.09544	0.000323489	0.00408494
chr6:42659682:42660888	chr6	42659682	42660888	1207	1.29485	4.30478	1.10618e-05	0.000238861
chr6:48077246:48079744	chr6	48077246	48079744	2499	1.77107	4.7597	4.27822e-09	2.76361e-07
chr6:52382536:52383299	chr6	52382536	52383299	764	0.909741	4.5487	0.000481202	0.00559864
chr6:52906650:52909736	chr6	52906650	52909736	3087	0.684115	5.63336	0.000367143	0.00451923
chr6:52912721:52914102	chr6	52912721	52914102	1382	1.26132	4.6354	2.77992e-06	7.2856e-05
chr6:53222901:53225570	chr6	53222901	53225570	2670	0.6687	6.34833	8.47241e-05	0.00131632
chr6:56506951:56508950	chr6	56506951	56508950	2000	2.03081	5.10161	2.34427e-12	4.33539e-10
chr6:56516109:56519018	chr6	56516109	56519018	2910	1.10812	6.59622	3.84439e-09	2.51884e-07
chr6:56619742:56624444	chr6	56619742	56624444	4703	0.685887	6.68212	9.11012e-06	0.0002003
chr6:56667190:56667698	chr6	56667190	56667698	509	1.62094	2.98396	0.000497994	0.00574447
chr6:71136300:71137069	chr6	71136300	71137069	770	2.41049	3.1561	6.03591e-06	0.00014124
chr6:75905148:75910359	chr6	75905148	75910359	5212	1.13177	6.79417	2.63134e-10	2.44784e-08
chr6:75913409:75916084	chr6	75913409	75916084	2676	0.795337	5.74232	4.52575e-05	0.000774512
chr6:81148213:81150575	chr6	81148213	81150575	2363	1.06429	5.66496	8.09497e-07	2.54642e-05
chr6:105657445:105658789	chr6	105657445	105658789	1345	1.65131	3.84576	1.09866e-05	0.000237684
chr6:106040011:106042114	chr6	106040011	106042114	2104	3.02505	4.51035	1.20068e-13	3.3578e-11
chr6:106056359:106058136	chr6	106056359	106058136	1778	2.87162	4.52199	2.55029e-13	6.35687e-11
chr6:106123529:106124372	chr6	106123529	106124372	844	1.98853	3.09182	3.37593e-05	0.000611507
chr6:107981421:107983595	chr6	107981421	107983595	2175	1.36025	5.17356	2.08256e-08	1.06127e-06
chr6:107986741:107988694	chr6	107986741	107988694	1954	1.14741	4.55918	2.31317e-05	0.000445014
chr6:108908260:108909439	chr6	108908260	108909439	1180	1.83262	4.40293	3.26904e-08	1.55854e-06
chr6:108930127:108930892	chr6	108930127	108930892	766	1.44419	3.91365	4.82577e-05	0.000814909
chr6:108994707:108995629	chr6	108994707	108995629	923	1.18895	4.15129	0.0001967	0.00267698
chr6:110867661:110870374	chr6	110867661	110870374	2714	0.934006	6.26182	1.66302e-07	6.47315e-06
chr6:118816501:118817573	chr6	118816501	118817573	1073	1.56851	3.93367	1.13616e-05	0.000243728
chr6:128811854:128813858	chr6	128811854	128813858	2005	0.854909	5.68829	4.94066e-06	0.00011963
chr6:130184425:130185852	chr6	130184425	130185852	1428	1.16179	4.86684	2.05002e-05	0.000401461
chr6:130922456:130924726	chr6	130922456	130924726	2271	0.963063	5.31525	6.08798e-06	0.000142169
chr6:130946656:130948297	chr6	130946656	130948297	1642	1.02232	5.05873	7.38553e-06	0.000168021
chr6:131259102:131260526	chr6	131259102	131260526	1425	1.41739	4.72065	2.52574e-07	9.20831e-06
chr6:131963894:131964986	chr6	131963894	131964986	1093	1.35764	3.38824	0.00077424	0.00823892
chr6:133412130:133425207	chr6	133412130	133425207	13078	0.753141	9.03097	4.49064e-09	2.89268e-07
chr6:133450259:133454254	chr6	133450259	133454254	3996	0.838027	6.60812	2.25369e-07	8.37627e-06
chr6:133889568:133891472	chr6	133889568	133891472	1905	1.39476	5.52429	2.53653e-09	1.76266e-07
chr6:133911195:133912282	chr6	133911195	133912282	1088	2.12682	3.85961	5.62885e-07	1.85195e-05
chr6:133929959:133933003	chr6	133929959	133933003	3045	2.92182	5.45239	9.32109e-18	1.64424e-14
chr6:133951932:133954334	chr6	133951932	133954334	2403	3.35343	5.05098	1.16088e-16	1.0239e-13
chr6:133965257:133969066	chr6	133965257	133969066	3810	3.34997	5.76408	9.06822e-15	3.71344e-12
chr6:134025871:134027917	chr6	134025871	134027917	2047	3.76318	4.71453	4.5098e-16	3.33609e-13
chr6:134060497:134063214	chr6	134060497	134063214	2718	3.41191	5.59173	4.60299e-20	1.31945e-16
chr6:134064318:134068983	chr6	134064318	134068983	4666	0.78161	6.90291	1.36999e-06	4.02776e-05
chr6:134076017:134078990	chr6	134076017	134078990	2974	3.9406	5.85645	1.88847e-22	4.33065e-18
chr6:134084282:134086596	chr6	134084282	134086596	2315	3.54201	5.12518	4.27539e-16	3.33609e-13
chr6:134088778:134091996	chr6	134088778	134091996	3219	3.78139	6.02056	3.97161e-22	4.55385e-18
chr6:134211704:134213332	chr6	134211704	134213332	1629	2.26989	4.24815	2.54485e-09	1.7631e-07
chr6:134237380:134238579	chr6	134237380	134238579	1200	2.61958	3.51763	1.1934e-07	4.83515e-06
chr6:135173967:135174724	chr6	135173967	135174724	758	2.14893	3.21609	5.25868e-06	0.000126011
chr6:136723945:136725230	chr6	136723945	136725230	1286	1.3044	5.33999	1.23142e-08	6.87327e-07
chr6:138775496:138778245	chr6	138775496	138778245	2750	1.37648	6.15382	8.88549e-11	9.30421e-09
chr6:138785967:138786896	chr6	138785967	138786896	930	1.62703	4.58628	4.05635e-07	1.39461e-05
chr6:147384333:147385382	chr6	147384333	147385382	1050	1.5016	3.93518	8.38947e-06	0.000187147
chr6:151177753:151179910	chr6	151177753	151179910	2158	0.871678	6.79729	1.56567e-07	6.14793e-06
chr6:151342794:151344100	chr6	151342794	151344100	1307	0.898503	4.58473	0.000435139	0.00518369
chr6:151445977:151449054	chr6	151445977	151449054	3078	0.753521	7.00942	2.62456e-06	6.92406e-05
chr6:154809830:154810704	chr6	154809830	154810704	875	1.19031	3.652	0.000699403	0.00757973
chr6:157939504:157940043	chr6	157939504	157940043	540	1.57817	3.04264	0.000676527	0.00738767
chr6:157955899:157957832	chr6	157955899	157957832	1934	1.42623	5.86563	2.88627e-10	2.6265e-08
chr6:159118517:159120514	chr6	159118517	159120514	1998	0.713949	6.24392	3.29889e-05	0.000598973
chr6:160015062:160016723	chr6	160015062	160016723	1662	0.820415	5.03119	0.000372176	0.00457627
chr6:161458781:161460077	chr6	161458781	161460077	1297	1.39842	4.01699	1.76976e-05	0.0003582
chr6:168083217:168084314	chr6	168083217	168084314	1098	1.00164	4.15359	0.000519766	0.00594181
chr7:2000968:2002499	chr7	2000968	2002499	1532	1.87678	3.87478	5.67786e-07	1.8654e-05
chr7:12754984:12756079	chr7	12754984	12756079	1096	1.62651	4.39594	1.78941e-07	6.8735e-06
chr7:13985154:13986212	chr7	13985154	13986212	1059	2.42024	3.2585	3.10225e-06	7.99334e-05
chr7:14060091:14061410	chr7	14060091	14061410	1320	1.10914	4.27745	0.000285333	0.00366569
chr7:16168193:16170549	chr7	16168193	16170549	2357	1.17527	5.27619	4.28766e-07	1.45666e-05
chr7:16310740:16313555	chr7	16310740	16313555	2816	2.0011	5.79319	1.63555e-14	5.95339e-12
chr7:16357979:16359666	chr7	16357979	16359666	1688	1.26621	5.28619	7.04107e-08	3.02938e-06
chr7:16523332:16525885	chr7	16523332	16525885	2554	0.897657	6.5393	1.46571e-07	5.80514e-06
chr7:18547717:18549465	chr7	18547717	18549465	1749	1.18398	5.23692	1.14988e-07	4.67535e-06
chr7:24863411:24868114	chr7	24863411	24868114	4704	0.672926	7.8242	2.99137e-06	7.73371e-05
chr7:25009487:25013261	chr7	25009487	25013261	3775	0.795103	6.58712	2.05787e-06	5.64486e-05
chr7:26195207:26196534	chr7	26195207	26196534	1328	2.03218	4.12611	1.93905e-07	7.3742e-06
chr7:30245627:30246762	chr7	30245627	30246762	1136	1.79044	3.75823	2.12881e-06	5.80302e-05
chr7:30954045:30954923	chr7	30954045	30954923	879	1.47216	3.69686	0.00010056	0.00151315
chr7:36698248:36699245	chr7	36698248	36699245	998	2.6549	3.98877	1.79821e-09	1.30495e-07
chr7:41286317:41288264	chr7	41286317	41288264	1948	0.676542	5.46949	0.000378696	0.00463902
chr7:44749912:44751244	chr7	44749912	44751244	1333	2.0325	4.14389	3.91062e-08	1.83017e-06
chr7:46013329:46014643	chr7	46013329	46014643	1315	2.46442	4.49027	2.12005e-11	2.81023e-09
chr7:46017194:46019148	chr7	46017194	46019148	1955	0.644062	5.74364	0.000339347	0.00423914
chr7:47596822:47598301	chr7	47596822	47598301	1480	0.735505	4.9673	0.000757111	0.00809112
chr7:55153255:55155943	chr7	55153255	55155943	2689	0.877369	6.27672	7.17596e-07	2.28237e-05
chr7:55841545:55842909	chr7	55841545	55842909	1365	1.30765	3.53648	0.000543841	0.00615565
chr7:56077481:56078298	chr7	56077481	56078298	818	2.69739	3.0503	1.67737e-06	4.76059e-05
chr7:65820442:65822751	chr7	65820442	65822751	2310	2.41264	5.62065	1.24829e-16	1.06021e-13
chr7:65843826:65846508	chr7	65843826	65846508	2683	1.1062	5.56394	7.72528e-05	0.00121776
chr7:76638930:76640156	chr7	76638930	76640156	1227	1.00819	4.69444	7.1706e-05	0.00114192
chr7:77054666:77055853	chr7	77054666	77055853	1188	2.35539	3.92105	1.46853e-08	7.9585e-07
chr7:80370278:80370691	chr7	80370278	80370691	414	2.45989	2.45511	8.64204e-05	0.00133634
chr7:80376703:80379667	chr7	80376703	80379667	2965	2.13882	5.9349	1.24638e-15	8.40644e-13
chr7:80459862:80460756	chr7	80459862	80460756	895	1.66135	3.67096	1.84783e-05	0.000370729
chr7:80511650:80515458	chr7	80511650	80515458	3809	1.12154	6.41698	1.39226e-09	1.02407e-07
chr7:80529925:80531293	chr7	80529925	80531293	1369	2.55513	3.96644	9.37119e-09	5.45709e-07
chr7:80536209:80537550	chr7	80536209	80537550	1342	4.04463	3.50621	2.17131e-10	2.06608e-08
chr7:80547639:80549001	chr7	80547639	80549001	1363	1.16825	3.8313	0.000339441	0.00423914
chr7:80913449:80914919	chr7	80913449	80914919	1471	0.856889	4.42931	0.000906113	0.00937185
chr7:83653370:83655885	chr7	83653370	83655885	2516	2.25809	5.67563	1.6624e-14	5.95659e-12
chr7:83670766:83672403	chr7	83670766	83672403	1638	2.12714	5.06012	1.56649e-12	3.15112e-10
chr7:83689923:83691248	chr7	83689923	83691248	1326	2.23006	4.187	6.05318e-09	3.76183e-07
chr7:83702499:83703429	chr7	83702499	83703429	931	2.14039	3.1192	1.13584e-05	0.000243728
chr7:83714097:83715622	chr7	83714097	83715622	1526	1.72798	4.23058	3.7476e-07	1.30212e-05
chr7:83816231:83818566	chr7	83816231	83818566	2336	2.25055	4.69801	1.16757e-11	1.7274e-09
chr7:83822751:83826087	chr7	83822751	83826087	3337	1.72204	5.7459	6.15791e-12	9.94459e-10
chr7:84040050:84042912	chr7	84040050	84042912	2863	1.29127	5.40034	4.01913e-08	1.87331e-06
chr7:92254326:92256423	chr7	92254326	92256423	2098	0.866274	5.44696	1.30577e-05	0.000274397
chr7:92274306:92276160	chr7	92274306	92276160	1855	1.19246	5.27165	2.37353e-07	8.73142e-06
chr7:92323578:92330213	chr7	92323578	92330213	6636	0.689493	7.96311	6.72529e-07	2.15699e-05
chr7:98864838:98865842	chr7	98864838	98865842	1005	1.49482	4.33868	3.19193e-06	8.18763e-05
chr7:101241012:101242775	chr7	101241012	101242775	1764	0.808207	5.21984	9.69292e-05	0.00146815
chr7:104944391:104945528	chr7	104944391	104945528	1138	1.22948	4.46496	8.77301e-06	0.000194379
chr7:105409833:105411477	chr7	105409833	105411477	1645	1.45633	5.21022	4.79471e-09	3.05423e-07
chr7:105415222:105418818	chr7	105415222	105418818	3597	1.43711	6.62132	1.02796e-12	2.2031e-10
chr7:105430860:105432819	chr7	105430860	105432819	1960	1.21753	4.90393	6.60403e-07	2.12702e-05
chr7:105446218:105447649	chr7	105446218	105447649	1432	1.07845	4.14697	0.000346789	0.0043197
chr7:105469051:105472759	chr7	105469051	105472759	3709	1.01836	6.59515	7.36805e-09	4.46995e-07
chr7:106463883:106465476	chr7	106463883	106465476	1594	1.91701	5.54044	1.99271e-12	3.7766e-10
chr7:111570553:111572709	chr7	111570553	111572709	2157	1.22498	3.83877	0.000197136	0.00268134
chr7:116772218:116773214	chr7	116772218	116773214	997	1.9109	3.62895	2.60362e-06	6.89447e-05
chr7:124776280:124777768	chr7	124776280	124777768	1489	2.03036	4.95598	1.1881e-11	1.7465e-09
chr7:130523160:130525069	chr7	130523160	130525069	1910	0.650019	5.64159	0.000434971	0.00518369
chr7:131579580:131581305	chr7	131579580	131581305	1726	1.2334	5.04151	2.41934e-07	8.87686e-06
chr7:131581557:131582374	chr7	131581557	131582374	818	2.47188	3.29491	6.76233e-07	2.16583e-05
chr7:151289864:151290650	chr7	151289864	151290650	787	1.4881	4.31278	6.11538e-06	0.000142518
chr7:151294190:151299891	chr7	151294190	151299891	5702	0.771216	7.71302	4.50174e-08	2.07008e-06
chr7:151303787:151306513	chr7	151303787	151306513	2727	0.664224	6.64892	2.04518e-05	0.000400856
chr7:151383849:151386182	chr7	151383849	151386182	2334	0.646256	5.90713	0.000202956	0.00273782
chr7:154996702:154998709	chr7	154996702	154998709	2008	0.916149	5.60801	4.39342e-06	0.00010845
chr7:155000426:155001528	chr7	155000426	155001528	1103	1.05588	4.49502	5.90289e-05	0.000970358
chr7:155088080:155091340	chr7	155088080	155091340	3261	0.735804	5.94209	8.55444e-05	0.00132548
chr7:155751486:155755801	chr7	155751486	155755801	4316	0.654179	6.91215	1.24937e-05	0.000264548
chr7:156987053:156988268	chr7	156987053	156988268	1216	1.5646	4.1827	2.09991e-06	5.73958e-05
chr7:157081856:157082830	chr7	157081856	157082830	975	1.09442	4.47675	5.1818e-05	0.000864994
chr7:157092352:157096782	chr7	157092352	157096782	4431	1.19446	6.0882	9.23674e-10	7.30403e-08
chr7:157101193:157104998	chr7	157101193	157104998	3806	1.07484	7.20586	3.31267e-10	2.97906e-08
chr7:157111953:157113833	chr7	157111953	157113833	1881	2.15578	3.04471	4.73766e-05	0.00080358
chr7:157356737:157358920	chr7	157356737	157358920	2184	0.73485	6.09046	4.14709e-05	0.000721556
chr7:157943816:157944186	chr7	157943816	157944186	371	0.919889	5.00811	4.9441e-05	0.000831218
chr8:6403155:6407029	chr8	6403155	6407029	3875	1.49369	6.72016	1.18101e-12	2.46208e-10
chr8:6413266:6421425	chr8	6413266	6421425	8160	0.768984	8.37697	1.35029e-08	7.49752e-07
chr8:6433221:6435432	chr8	6433221	6435432	2212	1.49834	5.36086	7.0146e-10	5.80718e-08
chr8:6441888:6443636	chr8	6441888	6443636	1749	1.0206	5.8409	7.84522e-08	3.34399e-06
chr8:6448718:6461975	chr8	6448718	6461975	13258	0.965413	8.91281	7.40091e-12	1.17047e-09
chr8:6483579:6484336	chr8	6483579	6484336	758	1.64521	3.31183	0.000119845	0.00176059
chr8:6497807:6503527	chr8	6497807	6503527	5721	1.09094	7.33841	4.15323e-11	5.06606e-09
chr8:6505208:6507342	chr8	6505208	6507342	2135	0.757108	6.63717	1.38832e-05	0.000290218
chr8:6517903:6519914	chr8	6517903	6519914	2012	4.00985	4.77126	4.05752e-17	4.65236e-14
chr8:6538746:6540220	chr8	6538746	6540220	1475	2.02257	4.70401	7.07386e-11	7.61585e-09
chr8:8167688:8169123	chr8	8167688	8169123	1436	0.68982	5.57777	0.000479568	0.00558814
chr8:8910110:8911752	chr8	8910110	8911752	1643	1.0366	5.3149	8.68944e-07	2.7148e-05
chr8:18577225:18579145	chr8	18577225	18579145	1921	1.03577	4.24375	0.000686295	0.00747654
chr8:18984513:18986600	chr8	18984513	18986600	2088	0.790427	5.67885	0.000513755	0.00588891
chr8:18991016:18993982	chr8	18991016	18993982	2967	0.791246	6.99224	1.96257e-07	7.43896e-06
chr8:18997157:19000539	chr8	18997157	19000539	3383	0.686467	6.84542	7.41195e-06	0.000168347
chr8:22193374:22194120	chr8	22193374	22194120	747	1.53846	3.81432	6.58499e-05	0.00106418
chr8:22508146:22509135	chr8	22508146	22509135	990	1.13543	3.86404	0.000684352	0.00745892
chr8:22601158:22603067	chr8	22601158	22603067	1910	0.811132	5.38735	4.499e-05	0.000771084
chr8:23017031:23018589	chr8	23017031	23018589	1559	1.09172	4.41966	9.86672e-05	0.00149114
chr8:23209904:23212304	chr8	23209904	23212304	2401	0.671864	5.6842	0.000352014	0.00437291
chr8:26305528:26309704	chr8	26305528	26309704	4177	0.679514	7.24284	4.59544e-06	0.000112229
chr8:26497631:26500132	chr8	26497631	26500132	2502	1.06985	6.09751	1.11477e-08	6.37504e-07
chr8:29410762:29415257	chr8	29410762	29415257	4496	1.06792	7.20956	2.81704e-09	1.91692e-07
chr8:29627454:29629037	chr8	29627454	29629037	1584	1.16579	5.1046	4.4796e-07	1.51514e-05
chr8:32435158:32436381	chr8	32435158	32436381	1224	3.48687	3.41667	2.33125e-09	1.63487e-07
chr8:32558554:32561025	chr8	32558554	32561025	2472	2.51452	4.42026	4.46906e-11	5.33773e-09
chr8:32567902:32570103	chr8	32567902	32570103	2202	2.50902	5.01186	1.39795e-13	3.7715e-11
chr8:32571973:32574225	chr8	32571973	32574225	2253	1.68315	5.18685	7.43743e-10	6.09126e-08
chr8:32578280:32579981	chr8	32578280	32579981	1702	2.64713	4.60469	5.95026e-13	1.351e-10
chr8:32588954:32589693	chr8	32588954	32589693	740	2.60006	2.84609	6.55904e-06	0.00015172
chr8:37914828:37916418	chr8	37914828	37916418	1591	1.18299	4.7133	4.34039e-06	0.000107488
chr8:41674694:41675559	chr8	41674694	41675559	866	1.50909	3.46739	0.000164054	0.00229675
chr8:41675624:41677250	chr8	41675624	41677250	1627	0.910248	4.55832	0.000316962	0.00401135
chr8:41997121:41998465	chr8	41997121	41998465	1345	0.940256	4.23408	0.000810979	0.00855445
chr8:54796822:54799453	chr8	54796822	54799453	2632	0.747269	5.67378	6.26161e-05	0.001022
chr8:67433549:67436275	chr8	67433549	67436275	2727	0.65682	6.16754	9.57378e-05	0.00145588
chr8:67467610:67468698	chr8	67467610	67468698	1089	2.01821	4.12739	1.66825e-07	6.47315e-06
chr8:89969258:89970733	chr8	89969258	89970733	1476	0.899914	4.59532	0.000463655	0.00543308
chr8:90189979:90190984	chr8	90189979	90190984	1006	2.6234	3.87858	1.10514e-09	8.53306e-08
chr8:90265410:90266616	chr8	90265410	90266616	1207	1.3283	3.97965	0.000230027	0.00304033
chr8:90269567:90272253	chr8	90269567	90272253	2687	1.71084	5.99998	3.94671e-09	2.57852e-07
chr8:90334258:90335103	chr8	90334258	90335103	846	0.994322	4.26984	0.000746533	0.00799976
chr8:90546316:90548000	chr8	90546316	90548000	1685	0.86562	5.44363	9.63768e-06	0.000210487
chr8:90553435:90556917	chr8	90553435	90556917	3483	1.25127	6.74588	2.295e-11	3.02465e-09
chr8:90558032:90559863	chr8	90558032	90559863	1832	1.63821	5.97153	7.25782e-13	1.58511e-10
chr8:90622679:90625603	chr8	90622679	90625603	2925	1.24649	6.77441	3.38804e-11	4.17776e-09
chr8:95246258:95247386	chr8	95246258	95247386	1129	0.909771	4.57095	0.000634161	0.00699162
chr8:95961611:95962771	chr8	95961611	95962771	1161	0.872493	4.53675	0.000536066	0.00609171
chr8:101524293:101524923	chr8	101524293	101524923	631	1.80705	3.12315	0.000106688	0.00159074
chr8:101816405:101817292	chr8	101816405	101817292	888	2.72277	4.24447	1.80768e-11	2.43845e-09
chr8:103806197:103808262	chr8	103806197	103808262	2066	1.607	5.65133	7.67446e-12	1.20277e-09
chr8:103816503:103823856	chr8	103816503	103823856	7354	0.680197	8.06073	2.94036e-07	1.05357e-05
chr8:104991643:104993660	chr8	104991643	104993660	2018	2.32834	4.38381	2.16389e-10	2.06608e-08
chr8:105186749:105189115	chr8	105186749	105189115	2367	2.40687	5.1919	4.26956e-14	1.35986e-11
chr8:105191923:105195357	chr8	105191923	105195357	3435	1.57638	4.96238	4.70217e-08	2.13949e-06
chr8:105210454:105215030	chr8	105210454	105215030	4577	2.08102	5.88321	4.10216e-15	2.12901e-12
chr8:122156790:122159088	chr8	122156790	122159088	2299	1.28119	5.86864	7.82888e-10	6.34388e-08
chr8:122174495:122178032	chr8	122174495	122178032	3538	0.866618	4.62718	0.000826195	0.00867108
chr8:122360050:122362663	chr8	122360050	122362663	2614	0.831719	5.48858	2.99937e-05	0.000554947
chr8:122368431:122369843	chr8	122368431	122369843	1413	1.63853	2.9877	0.000537	0.00609628
chr8:126043832:126044731	chr8	126043832	126044731	900	1.3737	3.65216	0.000255049	0.00331563
chr8:127518040:127519137	chr8	127518040	127519137	1098	1.53887	5.00297	4.12033e-09	2.6767e-07
chr8:128806344:128809012	chr8	128806344	128809012	2669	0.820677	6.62785	3.77937e-07	1.30919e-05
chr8:128818783:128824690	chr8	128818783	128824690	5908	0.609584	8.06552	1.62695e-06	4.63027e-05
chr8:128870926:128873545	chr8	128870926	128873545	2620	0.635835	5.91856	0.000246906	0.00322624
chr8:128923021:128924578	chr8	128923021	128924578	1558	0.864281	5.20684	3.83729e-05	0.000677419
chr8:129179491:129181904	chr8	129179491	129181904	2414	0.878174	5.40717	4.40636e-05	0.000758039
chr8:129526801:129527764	chr8	129526801	129527764	964	1.29483	4.01598	7.85514e-05	0.00123464
chr8:130860500:130862325	chr8	130860500	130862325	1826	1.121	4.6276	1.16321e-05	0.000248137
chr8:135903525:135905762	chr8	135903525	135905762	2238	1.495	5.39337	1.13173e-09	8.70898e-08
chr8:142136799:142139232	chr8	142136799	142139232	2434	0.651685	6.85968	1.27906e-05	0.000269343
chr8:143896223:143897937	chr8	143896223	143897937	1715	1.40127	5.15859	1.49256e-06	4.32164e-05
chr8:144365480:144366977	chr8	144365480	144366977	1498	0.753032	4.82003	0.000787663	0.00834304
chr8:145010032:145018881	chr8	145010032	145018881	8850	0.651562	8.89926	4.8091e-07	1.60061e-05
chr8:145020973:145028365	chr8	145020973	145028365	7393	0.887231	8.1186	1.20882e-09	9.08874e-08
chr9:557360:558552	chr9	557360	558552	1193	1.42651	3.63211	0.000116706	0.00172109
chr9:2260245:2261713	chr9	2260245	2261713	1469	0.873971	4.479	0.000710218	0.00767795
chr9:3746017:3747443	chr9	3746017	3747443	1427	2.10049	4.91879	1.00706e-11	1.5294e-09
chr9:3862799:3863964	chr9	3862799	3863964	1166	2.11917	3.55174	1.04281e-06	3.18849e-05
chr9:3874783:3876076	chr9	3874783	3876076	1294	2.75338	3.84685	1.18343e-09	8.95659e-08
chr9:3968944:3969757	chr9	3968944	3969757	814	1.92585	3.57351	2.34399e-06	6.31638e-05
chr9:4224748:4227229	chr9	4224748	4227229	2482	2.53241	4.35277	4.87403e-11	5.61049e-09
chr9:4235484:4237015	chr9	4235484	4237015	1532	2.09972	4.61458	2.67276e-10	2.46151e-08
chr9:4237509:4238875	chr9	4237509	4238875	1367	2.50949	3.65964	2.53535e-08	1.26393e-06
chr9:4261585:4263705	chr9	4261585	4263705	2121	1.48321	5.00221	1.51414e-08	8.13168e-07
chr9:4292758:4294329	chr9	4292758	4294329	1572	2.73565	4.67691	2.46302e-13	6.2068e-11
chr9:4297038:4299723	chr9	4297038	4299723	2686	1.53133	5.82701	1.02953e-11	1.54309e-09
chr9:4832752:4833945	chr9	4832752	4833945	1194	1.1136	4.87919	2.20362e-05	0.000427886
chr9:6943357:6946096	chr9	6943357	6946096	2740	0.74118	5.73021	5.75067e-05	0.00094687
chr9:6955050:6956378	chr9	6955050	6956378	1329	0.907635	4.42656	0.000700826	0.00759156
chr9:12859472:12860523	chr9	12859472	12860523	1052	1.47389	3.93826	1.89478e-05	0.000377835
chr9:36665683:36667278	chr9	36665683	36667278	1596	2.07569	4.39258	1.14633e-09	8.75761e-08
chr9:37963558:37966116	chr9	37963558	37966116	2559	0.753949	5.47503	8.81815e-05	0.00136082
chr9:38035187:38037176	chr9	38035187	38037176	1990	0.706248	5.33137	0.000535001	0.00608262
chr9:41002574:41004165	chr9	41002574	41004165	1592	1.93641	3.85916	4.72108e-07	1.57589e-05
chr9:41008448:41010228	chr9	41008448	41010228	1781	1.49998	4.95891	9.37595e-09	5.45709e-07
chr9:41017773:41019603	chr9	41017773	41019603	1831	2.12594	4.64763	4.95254e-11	5.62236e-09
chr9:41100156:41101668	chr9	41100156	41101668	1513	1.01416	4.63125	8.86848e-05	0.0013667
chr9:41727491:41728317	chr9	41727491	41728317	827	1.38288	3.74864	9.66991e-05	0.0014666
chr9:41809323:41811489	chr9	41809323	41811489	2167	2.62295	4.79438	1.09927e-13	3.15105e-11
chr9:41818977:41820960	chr9	41818977	41820960	1984	1.5964	5.16641	4.98507e-10	4.29765e-08
chr9:41824168:41826475	chr9	41824168	41826475	2308	1.9377	4.56971	2.11775e-09	1.50821e-07
chr9:42753180:42754877	chr9	42753180	42754877	1698	0.782057	5.51537	4.45234e-05	0.000764802
chr9:42844941:42846779	chr9	42844941	42846779	1839	1.03063	5.11984	5.30785e-06	0.000127056
chr9:43374211:43377339	chr9	43374211	43377339	3129	2.09788	5.5036	1.60484e-13	4.18208e-11
chr9:43378846:43382672	chr9	43378846	43382672	3827	1.82769	6.36412	2.0228e-15	1.10445e-12
chr9:43387914:43391347	chr9	43387914	43391347	3434	2.87952	6.03167	3.66835e-20	1.20175e-16
chr9:43473309:43474712	chr9	43473309	43474712	1404	1.02473	4.38996	0.000169234	0.00235633
chr9:43490544:43491264	chr9	43490544	43491264	721	1.37132	3.63712	0.000183739	0.00252759
chr9:44533000:44536235	chr9	44533000	44536235	3236	2.18808	5.42111	2.81887e-14	9.79428e-12
chr9:44537145:44541561	chr9	44537145	44541561	4417	1.80334	6.38311	4.83279e-15	2.34678e-12
chr9:44546903:44550267	chr9	44546903	44550267	3365	2.98415	5.95947	2.28305e-20	8.72582e-17
chr9:46971971:46973427	chr9	46971971	46973427	1457	1.73894	3.9603	1.25955e-06	3.75758e-05
chr9:46977555:46979492	chr9	46977555	46979492	1938	1.40827	5.08474	2.04862e-08	1.04864e-06
chr9:46987076:46988713	chr9	46987076	46988713	1638	2.07023	4.964	3.7005e-12	6.57829e-10
chr9:66032763:66035070	chr9	66032763	66035070	2308	2.00078	4.65622	2.21664e-10	2.10049e-08
chr9:66038363:66040317	chr9	66038363	66040317	1955	1.545	5.17833	9.27197e-10	7.30669e-08
chr9:66047711:66049795	chr9	66047711	66049795	2085	2.10319	4.78833	3.38689e-11	4.17776e-09
chr9:67017583:67019947	chr9	67017583	67019947	2365	1.14353	5.37846	2.352e-07	8.6714e-06
chr9:67025900:67028716	chr9	67025900	67028716	2817	0.614971	6.08263	0.000509021	0.0058452
chr9:67300361:67303390	chr9	67300361	67303390	3030	0.778174	6.11791	8.61745e-06	0.000191302
chr9:69662622:69664747	chr9	69662622	69664747	2126	1.03872	5.43566	4.78384e-07	1.59452e-05
chr9:70141110:70142585	chr9	70141110	70142585	1476	0.629583	5.57387	0.000707304	0.0076545
chr9:70391715:70393483	chr9	70391715	70393483	1769	0.732254	5.53634	0.000647886	0.0071224
chr9:72500497:72501430	chr9	72500497	72501430	934	1.52191	3.29105	0.000292333	0.00374512
chr9:72590495:72591738	chr9	72590495	72591738	1244	1.31249	4.29006	1.58718e-05	0.000325632
chr9:78638328:78639494	chr9	78638328	78639494	1167	1.42875	3.52141	0.000183695	0.00252759
chr9:81480235:81482994	chr9	81480235	81482994	2760	0.751873	5.94444	4.57465e-05	0.000781713
chr9:81484932:81488440	chr9	81484932	81488440	3509	0.765659	6.44968	4.40818e-06	0.000108645
chr9:84635847:84636790	chr9	84635847	84636790	944	1.54714	3.83064	2.23952e-05	0.000432157
chr9:94558699:94560971	chr9	94558699	94560971	2273	1.03996	4.31377	0.000205404	0.00276752
chr9:94908919:94910373	chr9	94908919	94910373	1455	1.12598	4.86555	7.71018e-06	0.000174713
chr9:97411101:97411861	chr9	97411101	97411861	761	1.99601	3.17193	3.43423e-05	0.000619621
chr9:97544368:97546633	chr9	97544368	97546633	2266	1.64283	5.61319	1.51054e-11	2.13825e-09
chr9:97554265:97555400	chr9	97554265	97555400	1136	1.70219	4.35516	9.93005e-08	4.11783e-06
chr9:97561310:97563186	chr9	97561310	97563186	1877	2.15777	5.28475	1.13308e-13	3.20786e-11
chr9:97564622:97566877	chr9	97564622	97566877	2256	2.12471	5.6662	3.38767e-14	1.14244e-11
chr9:97567032:97569344	chr9	97567032	97569344	2313	2.31745	6.03177	1.95613e-17	2.99053e-14
chr9:97574582:97575376	chr9	97574582	97575376	795	1.68055	3.35338	6.80292e-05	0.00109289
chr9:97615951:97617355	chr9	97615951	97617355	1405	2.08728	4.85983	1.96542e-11	2.63573e-09
chr9:97628671:97632333	chr9	97628671	97632333	3663	1.59221	6.85191	8.11232e-15	3.44503e-12
chr9:97634545:97637863	chr9	97634545	97637863	3319	2.3757	6.52444	3.89484e-18	8.11967e-15
chr9:97674066:97677961	chr9	97674066	97677961	3896	1.25994	6.97428	5.38455e-12	8.8199e-10
chr9:97679247:97685655	chr9	97679247	97685655	6409	2.07362	7.71575	6.84826e-21	3.92611e-17
chr9:97689247:97693101	chr9	97689247	97693101	3855	2.71862	6.77996	2.57154e-21	1.96569e-17
chr9:97703348:97704252	chr9	97703348	97704252	905	1.30464	4.0546	4.62104e-05	0.000788464
chr9:97707416:97708512	chr9	97707416	97708512	1097	1.81982	4.26261	1.68551e-07	6.51907e-06
chr9:97765492:97769312	chr9	97765492	97769312	3821	1.66377	6.38606	1.81837e-13	4.68526e-11
chr9:97779201:97782458	chr9	97779201	97782458	3258	1.3705	5.96668	8.80723e-11	9.26456e-09
chr9:97783218:97788824	chr9	97783218	97788824	5607	0.922583	7.59636	1.01561e-09	7.92179e-08
chr9:97854053:97854876	chr9	97854053	97854876	824	1.43816	3.21888	0.00068079	0.00742715
chr9:110762080:110765068	chr9	110762080	110765068	2989	0.826074	6.40215	2.43902e-06	6.52643e-05
chr9:114784012:114785422	chr9	114784012	114785422	1411	1.0888	4.16166	0.000210763	0.00282479
chr9:114792049:114792562	chr9	114792049	114792562	514	1.37991	3.49855	0.000440065	0.0052315
chr9:114802768:114806206	chr9	114802768	114806206	3439	1.49329	5.38229	5.7398e-10	4.89312e-08
chr9:115516920:115518227	chr9	115516920	115518227	1308	1.04417	4.7388	4.10518e-05	0.000715893
chr9:116457802:116459114	chr9	116457802	116459114	1313	2.06262	3.89633	5.1793e-07	1.71539e-05
chr9:124043392:124045826	chr9	124043392	124045826	2435	0.752524	6.03162	3.85795e-05	0.000680443
chr9:124047547:124052702	chr9	124047547	124052702	5156	0.663225	8.13431	6.04431e-07	1.97167e-05
chr9:124084490:124085403	chr9	124084490	124085403	914	1.14701	4.08818	0.000943645	0.00969119
chr9:124510357:124511848	chr9	124510357	124511848	1492	1.47567	5.12576	3.63142e-09	2.40681e-07
chr9:124512354:124513749	chr9	124512354	124513749	1396	1.3688	5.65942	1.14676e-09	8.75761e-08
chr9:127427434:127428284	chr9	127427434	127428284	851	2.28457	3.62659	3.08051e-07	1.09693e-05
chr9:128283842:128285273	chr9	128283842	128285273	1432	1.67702	4.80436	6.90004e-08	2.97428e-06
chr9:130712367:130713711	chr9	130712367	130713711	1345	1.38092	4.56134	2.19352e-06	5.95994e-05
chr9:131674286:131675028	chr9	131674286	131675028	743	2.26907	3.15998	1.99981e-05	0.000392971
chr9:134608892:134609902	chr9	134608892	134609902	1011	1.08747	4.34839	0.000177884	0.00246331
chr9:137269496:137273715	chr9	137269496	137273715	4220	0.675953	6.76794	1.28276e-05	0.000269874
chr9:137296751:137299943	chr9	137296751	137299943	3193	0.697911	5.51968	0.000177563	0.00246035
chr9:138843491:138844525	chr9	138843491	138844525	1035	1.19818	4.83646	1.83677e-06	5.16819e-05
chr9:138999849:139002104	chr9	138999849	139002104	2256	1.07663	5.05872	3.12474e-06	8.03325e-05
chr9:139119611:139120989	chr9	139119611	139120989	1379	0.892069	4.73514	0.000274553	0.0035371
chr9:139444735:139446115	chr9	139444735	139446115	1381	1.40996	4.36646	4.17133e-06	0.000103975
chr9:139795320:139796600	chr9	139795320	139796600	1281	0.897053	4.83237	0.000142302	0.00203954
chrX:14981346:14983055	chrX	14981346	14983055	1710	0.967369	4.94567	2.80264e-05	0.000524654
chrX:15492721:15494402	chrX	15492721	15494402	1682	4.83424	4.42394	6.69482e-17	6.67503e-14
chrX:23840173:23840989	chrX	23840173	23840989	817	2.18647	3.53318	1.51027e-06	4.36741e-05
chrX:37781057:37781538	chrX	37781057	37781538	482	2.89754	2.58762	8.84379e-06	0.00019557
chrX:37919233:37921872	chrX	37919233	37921872	2640	1.45289	5.05776	8.44981e-09	5.03301e-07
chrX:41004477:41005985	chrX	41004477	41005985	1509	2.35851	4.15201	7.07341e-10	5.8348e-08
chrX:41007703:41008694	chrX	41007703	41008694	992	1.21625	3.94972	0.000226109	0.00300066
chrX:67334172:67335073	chrX	67334172	67335073	902	1.59331	3.39077	0.000109673	0.00162996
chrX:69696039:69698119	chrX	69696039	69698119	2081	0.96407	5.41845	5.61967e-06	0.000133268
chrX:100003081:100003763	chrX	100003081	100003763	683	1.97453	3.11593	0.000112274	0.0016643
chrX:109330019:109331555	chrX	109330019	109331555	1537	1.12413	4.61173	4.13826e-05	0.000721113
chrX:109452545:109454715	chrX	109452545	109454715	2171	1.17531	5.33435	1.63084e-07	6.37113e-06
chrX:132324546:132327083	chrX	132324546	132327083	2538	2.26382	4.69399	1.75362e-11	2.39369e-09
chrX:133737728:133739643	chrX	133737728	133739643	1916	0.963733	4.55082	0.000333988	0.00418592

## Sheet: H3K27ac decreased in Fbw7-Arg
Peakid	Chr	Start	End	Length	logFC	logCPM	PValue	FDR
chr1:8229162:8230546	chr1	8229162	8230546	1385	-0.801136	5.29639	0.000138648	0.0019934
chr1:9952530:9954413	chr1	9952530	9954413	1884	-0.607539	5.5552	0.000797576	0.00843246
chr1:14084536:14086050	chr1	14084536	14086050	1515	-1.85276	3.70367	2.68892e-06	7.0552e-05
chr1:14248547:14249207	chr1	14248547	14249207	661	-2.28517	3.08652	1.11327e-05	0.000239938
chr1:17846390:17847460	chr1	17846390	17847460	1071	-1.8267	2.89756	0.000195912	0.00266785
chr1:23152429:23153766	chr1	23152429	23153766	1338	-1.85956	3.70311	2.78829e-06	7.29563e-05
chr1:27468144:27469588	chr1	27468144	27469588	1445	-1.25897	3.84736	0.000200566	0.00271571
chr1:27843901:27845586	chr1	27843901	27845586	1686	-1.26223	4.17234	2.23974e-05	0.000432157
chr1:28851490:28854334	chr1	28851490	28854334	2845	-1.07544	5.95766	1.7799e-08	9.29764e-07
chr1:29298090:29299875	chr1	29298090	29299875	1786	-0.919389	4.86722	9.87073e-05	0.00149114
chr1:32027966:32029289	chr1	32027966	32029289	1324	-1.2389	4.17259	3.06086e-05	0.000561984
chr1:33685058:33687165	chr1	33685058	33687165	2108	-0.84098	5.38464	1.89459e-05	0.000377835
chr1:36901896:36902897	chr1	36901896	36902897	1002	-1.5915	3.82004	7.38053e-06	0.000168021
chr1:39424068:39426391	chr1	39424068	39426391	2324	-0.814486	5.41791	7.70872e-05	0.00121663
chr1:40572798:40573584	chr1	40572798	40573584	787	-2.72101	3.88826	6.15847e-10	5.23059e-08
chr1:41363667:41365916	chr1	41363667	41365916	2250	-1.81636	4.90971	3.59372e-10	3.16966e-08
chr1:52034146:52036524	chr1	52034146	52036524	2379	-0.882841	5.69469	2.50413e-06	6.66179e-05
chr1:52086744:52089104	chr1	52086744	52089104	2361	-0.766046	5.48533	5.11159e-05	0.000854989
chr1:56982100:56983281	chr1	56982100	56983281	1182	-1.76946	3.7119	2.81937e-06	7.36377e-05
chr1:68214150:68216411	chr1	68214150	68216411	2262	-0.682561	5.82846	8.96229e-05	0.00137658
chr1:80910611:80911739	chr1	80910611	80911739	1129	-1.83849	2.67706	0.000573136	0.00643011
chr1:80998431:81002993	chr1	80998431	81002993	4563	-1.36873	5.66538	2.70508e-10	2.48131e-08
chr1:87793455:87794159	chr1	87793455	87794159	705	-1.18665	3.89884	0.000352783	0.00437535
chr1:87794438:87797807	chr1	87794438	87797807	3370	-1.67513	5.28721	2.06267e-10	1.99583e-08
chr1:87800318:87801724	chr1	87800318	87801724	1407	-1.46115	4.40478	6.1979e-07	2.01318e-05
chr1:88260730:88262019	chr1	88260730	88262019	1290	-1.28745	4.0729	5.75174e-05	0.00094687
chr1:88271617:88272477	chr1	88271617	88272477	861	-1.07952	3.82659	0.000864295	0.0090173
chr1:94532961:94535810	chr1	94532961	94535810	2850	-1.06556	5.44621	5.03206e-07	1.67239e-05
chr1:94659335:94663894	chr1	94659335	94663894	4560	-0.888519	5.89718	8.28923e-07	2.60039e-05
chr1:94710051:94714232	chr1	94710051	94714232	4182	-0.949701	6.0874	2.66414e-07	9.66678e-06
chr1:94750053:94752052	chr1	94750053	94752052	2000	-0.710396	5.21554	0.000943678	0.00969119
chr1:94774216:94777444	chr1	94774216	94777444	3229	-1.19695	5.57441	2.26684e-08	1.14753e-06
chr1:94781432:94784139	chr1	94781432	94784139	2708	-1.0694	5.00892	1.36094e-05	0.000285014
chr1:95327944:95330554	chr1	95327944	95330554	2611	-0.737334	5.63882	6.5369e-05	0.00105966
chr1:110545794:110547339	chr1	110545794	110547339	1546	-0.665356	5.51868	0.000538553	0.00610964
chr1:150953486:150954854	chr1	150953486	150954854	1369	-1.33263	4.33556	5.55201e-06	0.000132073
chr1:151484879:151487323	chr1	151484879	151487323	2445	-0.993937	5.30572	1.91776e-06	5.34362e-05
chr1:151652058:151654331	chr1	151652058	151654331	2274	-1.06801	6.0747	7.63368e-08	3.26596e-06
chr1:153071839:153073682	chr1	153071839	153073682	1844	-4.17055	4.08929	3.87457e-14	1.26931e-11
chr1:153587984:153590521	chr1	153587984	153590521	2538	-0.690156	5.65799	0.000163795	0.00229594
chr1:156661889:156663673	chr1	156661889	156663673	1785	-1.15374	4.25674	0.000114295	0.0016888
chr1:164570520:164573289	chr1	164570520	164573289	2770	-1.74049	3.9105	1.87566e-06	5.25186e-05
chr1:164605533:164611400	chr1	164605533	164611400	5868	-1.28291	4.41355	8.08794e-06	0.000181836
chr1:164628800:164630223	chr1	164628800	164630223	1424	-2.20829	2.53384	0.000356379	0.00441041
chr1:164714426:164725881	chr1	164714426	164725881	11456	-2.3097	5.22516	1.32252e-12	2.68389e-10
chr1:164738635:164745769	chr1	164738635	164745769	7135	-1.93483	4.62797	9.74318e-10	7.62562e-08
chr1:164748919:164751963	chr1	164748919	164751963	3045	-2.54238	2.49024	9.9873e-05	0.0015038
chr1:168361074:168362556	chr1	168361074	168362556	1483	-1.10556	4.6332	1.20424e-05	0.000255936
chr1:168438698:168440996	chr1	168438698	168440996	2299	-0.833347	5.05222	0.000295497	0.00377933
chr1:169749903:169751692	chr1	169749903	169751692	1790	-2.44974	4.54295	7.71006e-12	1.20277e-09
chr1:181086637:181087439	chr1	181086637	181087439	803	-1.54735	3.48513	0.000181123	0.00249911
chr1:183132136:183134553	chr1	183132136	183134553	2418	-0.609604	6.02323	0.000497577	0.00574255
chr1:192668889:192672412	chr1	192668889	192672412	3524	-0.892782	6.63023	7.60867e-08	3.26135e-06
chr1:199727421:199729611	chr1	199727421	199729611	2191	-0.6072	5.99805	0.000330995	0.00415684
chr1:200383957:200386688	chr1	200383957	200386688	2732	-0.632989	6.9631	1.464e-05	0.000303823
chr1:201975343:201980523	chr1	201975343	201980523	5181	-0.651313	6.77753	1.18132e-05	0.000251766
chr1:206490722:206491892	chr1	206490722	206491892	1171	-1.9087	3.5018	4.3597e-06	0.00010785
chr1:210770892:210771982	chr1	210770892	210771982	1091	-1.5508	3.29794	0.000226767	0.00300591
chr1:213296642:213297919	chr1	213296642	213297919	1278	-0.875909	4.4678	0.000958288	0.00983243
chr1:215756445:215757236	chr1	215756445	215757236	792	-1.976	3.61847	1.24708e-06	3.73343e-05
chr1:219755473:219757113	chr1	219755473	219757113	1641	-2.57983	3.40108	5.74523e-07	1.88214e-05
chr1:219883970:219886064	chr1	219883970	219886064	2095	-1.4022	4.82939	4.32162e-08	1.99805e-06
chr1:219904685:219907842	chr1	219904685	219907842	3158	-2.77624	4.97925	1.85387e-15	1.07425e-12
chr1:219943571:219944890	chr1	219943571	219944890	1320	-1.58077	4.42682	1.75863e-07	6.77796e-06
chr1:219957885:219959080	chr1	219957885	219959080	1196	-1.68383	3.89368	1.51784e-06	4.37824e-05
chr1:219963156:219965337	chr1	219963156	219965337	2182	-1.87524	4.67824	2.30376e-10	2.17407e-08
chr1:219971194:219973530	chr1	219971194	219973530	2337	-1.84953	4.6867	8.02828e-10	6.48256e-08
chr1:222134408:222135856	chr1	222134408	222135856	1449	-0.920218	4.48494	0.000649483	0.00713311
chr1:234738187:234741242	chr1	234738187	234741242	3056	-0.618293	6.29007	0.000145386	0.00207855
chr10:17395662:17397109	chr10	17395662	17397109	1448	-0.929672	4.49447	0.000300572	0.00383355
chr10:28393388:28397921	chr10	28393388	28397921	4534	-0.621715	6.48018	6.70245e-05	0.0010786
chr10:28418585:28419897	chr10	28418585	28419897	1313	-0.848831	5.01834	0.000131845	0.00190515
chr10:28434269:28436178	chr10	28434269	28436178	1910	-2.70807	4.6962	1.22825e-13	3.39353e-11
chr10:28460218:28462555	chr10	28460218	28462555	2338	-2.45511	4.4117	3.38855e-11	4.17776e-09
chr10:28534396:28536011	chr10	28534396	28536011	1616	-1.02906	4.84199	2.56801e-05	0.0004879
chr10:28663360:28665910	chr10	28663360	28665910	2551	-1.19201	5.58665	1.57307e-08	8.40878e-07
chr10:32164854:32166854	chr10	32164854	32166854	2001	-1.84192	4.46556	1.18065e-08	6.65226e-07
chr10:32249802:32253827	chr10	32249802	32253827	4026	-0.873811	5.19927	4.99453e-05	0.000838467
chr10:32666450:32668987	chr10	32666450	32668987	2538	-0.704067	5.35993	0.000217969	0.00290777
chr10:33250635:33252794	chr10	33250635	33252794	2160	-0.711688	5.72157	7.88506e-05	0.0012385
chr10:34714601:34717396	chr10	34714601	34717396	2796	-1.40556	5.99406	1.10678e-10	1.12346e-08
chr10:47056236:47058662	chr10	47056236	47058662	2427	-0.618597	5.92811	0.000384902	0.00469936
chr10:52609383:52612356	chr10	52609383	52612356	2974	-0.870753	6.00997	2.37196e-06	6.38426e-05
chr10:54093915:54096012	chr10	54093915	54096012	2098	-1.17156	5.21971	1.68577e-07	6.51907e-06
chr10:54210240:54216042	chr10	54210240	54216042	5803	-0.693545	6.8601	5.14507e-06	0.000123936
chr10:62463647:62464265	chr10	62463647	62464265	619	-1.87438	2.50661	0.000633342	0.00698596
chr10:65251517:65252383	chr10	65251517	65252383	867	-1.60818	3.19499	0.000301662	0.00384317
chr10:69853393:69855608	chr10	69853393	69855608	2216	-0.815839	5.10405	0.000149733	0.00213537
chr10:69856511:69857957	chr10	69856511	69857957	1447	-0.900907	4.76397	0.000522105	0.00595964
chr10:71197716:71199613	chr10	71197716	71199613	1898	-0.972537	4.6785	9.23144e-05	0.0014113
chr10:71217432:71219887	chr10	71217432	71219887	2456	-0.8844	5.3692	1.26896e-05	0.000267953
chr10:71529064:71529578	chr10	71529064	71529578	515	-1.4621	3.08993	0.000974875	0.00997583
chr10:71812029:71814210	chr10	71812029	71814210	2182	-0.687221	5.18826	0.000671958	0.0073553
chr10:74069992:74071053	chr10	74069992	74071053	1062	-1.68073	3.06094	0.000244759	0.00320548
chr10:75690553:75693147	chr10	75690553	75693147	2595	-0.608097	6.38221	0.000236795	0.003119
chr10:75949107:75950893	chr10	75949107	75950893	1787	-0.651247	5.42829	0.000534465	0.00607954
chr10:76052788:76054585	chr10	76052788	76054585	1798	-1.19319	4.78869	2.262e-06	6.13148e-05
chr10:82218403:82221395	chr10	82218403	82221395	2993	-1.16065	5.66146	4.60832e-08	2.10934e-06
chr10:91110866:91112524	chr10	91110866	91112524	1659	-0.964583	4.12808	0.000902517	0.00934802
chr10:91907171:91910258	chr10	91907171	91910258	3088	-1.45164	5.31984	6.61322e-09	4.07673e-07
chr10:91981577:91983378	chr10	91981577	91983378	1802	-1.46488	4.97564	1.39998e-08	7.65787e-07
chr10:92065862:92066510	chr10	92065862	92066510	649	-1.38827	3.88197	3.43315e-05	0.000619621
chr10:92072328:92081420	chr10	92072328	92081420	9093	-0.798176	7.30773	6.12173e-08	2.67907e-06
chr10:92339293:92340498	chr10	92339293	92340498	1206	-1.24973	3.58259	0.000487037	0.00565505
chr10:93557350:93559674	chr10	93557350	93559674	2325	-0.643114	5.56284	0.000431457	0.00514517
chr10:97434951:97435947	chr10	97434951	97435947	997	-1.56747	3.73865	1.82466e-05	0.000367044
chr10:101680334:101682337	chr10	101680334	101682337	2004	-1.10568	4.80167	4.4108e-06	0.000108645
chr10:104998396:104999250	chr10	104998396	104999250	855	-1.09083	4.59365	1.99216e-05	0.000392138
chr10:105000304:105001978	chr10	105000304	105001978	1675	-0.70798	5.82348	4.57822e-05	0.00078174
chr10:112176251:112178324	chr10	112176251	112178324	2074	-0.978551	5.30389	3.41785e-06	8.71837e-05
chr10:112189929:112192336	chr10	112189929	112192336	2408	-1.77989	4.54639	2.76717e-09	1.89423e-07
chr10:112206714:112207553	chr10	112206714	112207553	840	-1.35411	3.63341	0.000180375	0.00249028
chr10:114091692:114093891	chr10	114091692	114093891	2200	-1.74554	5.29498	1.22437e-11	1.78836e-09
chr10:114120094:114122850	chr10	114120094	114122850	2757	-2.51759	5.57546	7.30202e-15	3.20075e-12
chr10:114133264:114140958	chr10	114133264	114140958	7695	-1.36518	8.09627	1.38057e-14	5.19005e-12
chr10:114141604:114146019	chr10	114141604	114146019	4416	-1.89733	6.88058	4.3829e-16	3.33609e-13
chr10:114147141:114151669	chr10	114147141	114151669	4529	-1.23363	7.23198	1.58215e-09	1.15547e-07
chr10:114163948:114165109	chr10	114163948	114165109	1162	-2.49306	4.64199	1.71265e-12	3.32834e-10
chr10:114238041:114262865	chr10	114238041	114262865	24825	-0.896539	8.99363	1.97947e-11	2.63915e-09
chr10:114264689:114270719	chr10	114264689	114270719	6031	-1.10454	7.40244	1.33352e-11	1.91127e-09
chr10:114563377:114565275	chr10	114563377	114565275	1899	-1.23393	4.88985	6.97958e-07	2.22609e-05
chr10:126752743:126754705	chr10	126752743	126754705	1963	-1.49278	5.18854	9.2445e-09	5.42186e-07
chr10:134220491:134221861	chr10	134220491	134221861	1371	-1.16667	3.866	0.000366887	0.0045185
chr11:2932413:2934716	chr11	2932413	2934716	2304	-0.829934	5.26345	6.36577e-05	0.00103484
chr11:9376736:9377216	chr11	9376736	9377216	481	-1.88001	2.85837	0.000156531	0.00221716
chr11:10427724:10429608	chr11	10427724	10429608	1885	-0.857662	5.09643	0.000203024	0.00273782
chr11:10654043:10655478	chr11	10654043	10655478	1436	-1.49155	3.98894	5.98394e-06	0.000140598
chr11:10709715:10711103	chr11	10709715	10711103	1389	-1.60618	3.74444	2.84009e-05	0.000530798
chr11:13905022:13906880	chr11	13905022	13906880	1859	-1.83094	3.09612	0.000113367	0.00167833
chr11:20000252:20000879	chr11	20000252	20000879	628	-1.87207	2.50806	0.000683412	0.00745221
chr11:34296093:34297304	chr11	34296093	34297304	1212	-1.70001	3.91176	2.98671e-06	7.73038e-05
chr11:57499505:57501458	chr11	57499505	57501458	1954	-2.1371	4.51463	1.17308e-10	1.17987e-08
chr11:61393898:61394854	chr11	61393898	61394854	957	-2.58512	3.29015	5.24809e-07	1.73414e-05
chr11:65886741:65887571	chr11	65886741	65887571	831	-1.57628	3.22197	0.000582319	0.0065045
chr11:108754039:108759834	chr11	108754039	108759834	5796	-1.26353	7.08255	1.11283e-12	2.36291e-10
chr11:108776028:108778558	chr11	108776028	108778558	2531	-0.954949	5.5622	1.20213e-06	3.61776e-05
chr11:117151832:117152440	chr11	117151832	117152440	609	-1.79367	2.54523	0.000935732	0.00962683
chr11:120187148:120187929	chr11	120187148	120187929	782	-2.62353	2.52962	1.97681e-05	0.000390122
chr11:121558401:121561014	chr11	121558401	121561014	2614	-1.31416	5.58225	1.48246e-09	1.08613e-07
chr11:123015537:123016977	chr11	123015537	123016977	1441	-0.990517	4.50128	0.000122694	0.00179555
chr11:124350967:124353725	chr11	124350967	124353725	2759	-1.60461	4.62644	1.33957e-07	5.37045e-06
chr11:128893923:128894777	chr11	128893923	128894777	855	-1.15722	3.84158	0.000601578	0.00667734
chr12:6330880:6332065	chr12	6330880	6332065	1186	-1.27489	3.8096	0.000193403	0.00264152
chr12:10523699:10525963	chr12	10523699	10525963	2265	-1.56497	4.65127	5.76888e-08	2.55884e-06
chr12:14409253:14411919	chr12	14409253	14411919	2667	-0.858018	5.69772	5.46765e-06	0.000130473
chr12:14412805:14414171	chr12	14412805	14414171	1367	-0.843419	4.84241	0.000475468	0.00554882
chr12:14536996:14538731	chr12	14536996	14538731	1736	-0.925471	5.10229	2.03427e-05	0.000399059
chr12:14546307:14548187	chr12	14546307	14548187	1881	-1.00737	5.64489	3.6377e-07	1.26971e-05
chr12:15840639:15845142	chr12	15840639	15845142	4504	-0.673216	6.63298	2.02108e-05	0.000396811
chr12:19667584:19668962	chr12	19667584	19668962	1379	-1.10533	4.47253	5.00337e-05	0.000839337
chr12:29265805:29266561	chr12	29265805	29266561	757	-1.77946	2.79257	0.000415122	0.00499598
chr12:48146731:48148277	chr12	48146731	48148277	1547	-0.754614	5.07766	0.000425134	0.00509628
chr12:53363184:53366225	chr12	53363184	53366225	3042	-1.45446	5.50145	3.42432e-10	3.0555e-08
chr12:56074744:56076446	chr12	56074744	56076446	1703	-0.828927	4.63031	0.000828819	0.00869066
chr12:64474310:64475214	chr12	64474310	64475214	905	-1.879	3.73527	1.0282e-06	3.15224e-05
chr12:65032437:65033689	chr12	65032437	65033689	1253	-1.80041	4.03814	2.29208e-07	8.48317e-06
chr12:65706548:65710295	chr12	65706548	65710295	3748	-1.08616	5.87826	1.86533e-08	9.6559e-07
chr12:65727975:65730014	chr12	65727975	65730014	2040	-1.05294	4.89798	7.41457e-06	0.000168347
chr12:65819213:65830950	chr12	65819213	65830950	11738	-0.639051	8.71398	1.58785e-07	6.22436e-06
chr12:66088632:66090795	chr12	66088632	66090795	2164	-0.937688	5.42187	5.45238e-06	0.00013038
chr12:66112840:66116002	chr12	66112840	66116002	3163	-1.68388	5.67659	9.525e-13	2.06063e-10
chr12:66118220:66124157	chr12	66118220	66124157	5938	-0.85181	7.82948	2.41767e-09	1.6903e-07
chr12:66158508:66160154	chr12	66158508	66160154	1647	-1.87463	4.89937	4.65464e-11	5.50151e-09
chr12:66170971:66172944	chr12	66170971	66172944	1974	-1.10858	4.58255	1.61746e-05	0.000330585
chr12:66227169:66231823	chr12	66227169	66231823	4655	-0.703981	6.39342	1.53253e-05	0.000316043
chr12:67986615:67987687	chr12	67986615	67987687	1073	-1.83826	3.24609	0.000115207	0.00170118
chr12:75734450:75736311	chr12	75734450	75736311	1862	-1.18688	4.85002	1.52955e-06	4.40649e-05
chr12:78249344:78250025	chr12	78249344	78250025	682	-2.49982	3.03987	1.31352e-06	3.88166e-05
chr12:78287072:78288486	chr12	78287072	78288486	1415	-2.15888	3.69996	3.28542e-07	1.1591e-05
chr12:78340397:78341894	chr12	78340397	78341894	1498	-0.919029	4.99405	9.66545e-05	0.0014666
chr12:96440583:96442717	chr12	96440583	96442717	2135	-0.908827	5.27951	1.07594e-05	0.000233428
chr12:98792551:98797305	chr12	98792551	98797305	4755	-0.846711	6.54005	1.32119e-06	3.89931e-05
chr12:104665442:104666767	chr12	104665442	104666767	1326	-1.0428	4.49214	6.79376e-05	0.00109253
chr12:113668127:113670210	chr12	113668127	113670210	2084	-1.21876	5.10837	4.1423e-07	1.4199e-05
chr12:116310868:116311609	chr12	116310868	116311609	742	-2.17908	2.96787	1.92311e-05	0.000381197
chr12:116976887:116978441	chr12	116976887	116978441	1555	-1.45718	4.16015	8.36077e-06	0.000187053
chr12:117352938:117355021	chr12	117352938	117355021	2084	-0.95346	4.68845	8.2997e-05	0.00129387
chr12:118708975:118710016	chr12	118708975	118710016	1042	-2.74998	3.33535	6.71111e-08	2.90376e-06
chr13:20368749:20369329	chr13	20368749	20369329	581	-2.88875	3.23917	3.25192e-08	1.5536e-06
chr13:41567636:41568953	chr13	41567636	41568953	1318	-2.3119	4.05419	1.38086e-09	1.02148e-07
chr13:44642808:44643574	chr13	44642808	44643574	767	-1.80214	3.00966	0.000121741	0.00178502
chr13:45047817:45049083	chr13	45047817	45049083	1267	-1.06079	4.49949	6.37006e-05	0.00103484
chr13:46038623:46040108	chr13	46038623	46040108	1486	-0.836914	4.78423	0.000355196	0.00440052
chr13:73629788:73630524	chr13	73629788	73630524	737	-1.34497	3.52117	0.000418108	0.00502782
chr13:73656417:73657174	chr13	73656417	73657174	758	-1.5459	3.02078	0.000690972	0.00751321
chr13:73669725:73671461	chr13	73669725	73671461	1737	-0.904371	4.94182	4.24664e-05	0.000736641
chr13:87508430:87509939	chr13	87508430	87509939	1510	-0.991013	4.14759	0.000623181	0.00689045
chr13:101033783:101035025	chr13	101033783	101035025	1243	-2.12371	3.05287	3.22045e-05	0.00058752
[truncated: 540 more rows]
