# Supplementary material for: Global and context-specific transcriptional consequences of oncogenic Fbw7 mutations
Source: eLife. 2022 Feb 28;11:e74338. doi: 10.7554/eLife.74338 (PMC8926403; doi:10.7554/eLife.74338)
Supplement: Figure 2—source data 2. — This Excel file includes a summary (total number of differential sites, percentage, and number of annotated genes) of H3K27ac, Jun, and Myc differential sites in Hct116 cells and Jun differential sites in U5-NSCs. CUT&RUN, cleavage under target and release using nuclease; NSC, neural stem cell. [file elife-74338-fig2-data2.xlsx]

## Sheet: Sheet1
A	No. of differential sites	Total no. of H3K27ac peaks in WT	% of differential sites	No. of protein coding genes (gene proximal diff. sites)
Hct116	(FDR < 0.01)
H3K27ac increased in Fbw7-/-	1608	17094	0.0940681
H3K27ac decreased in Fbw7-/-	1185	17094	0.0693226
H3K27ac increased in Fbw7R/+	1298	17094	0.0759331
H3K27ac decreased in Fbw7R/+	729	17094	0.0426465
B	No. of differential sites	Total no. of cJun peaks in WT	% of differential sites	No. of protein coding genes (gene proximal diff. sites)
Hct116	(FDR < 0.01)
cJun increased in Fbw7-/-	715	25527	0.0280096	275
cJun decreased in Fbw7-/-	626	25527	0.0245231	375
cJun increased in Fbw7R/+	530	25527	0.0207623	221
cJun decreased in Fbw7R/+	420	25527	0.0164532	209
C	No. of differential sites	Total no. of cMyc peaks in WT	% of differential sites	No. of protein coding genes (gene proximal diff. sites)
Hct116	(FDR < 0.05)
cMyc increased in Fbw7-/-	326	24111	0.0135208	115
cMyc decreased in Fbw7-/-	190	24111	0.00788022	140
cMyc increased in Fbw7R/+	613	24111	0.0254241	122
cMyc decreased in Fbw7R/+	181	24111	0.00750695	148
D	No. of differential sites	Total no. of cJun peaks in WT	% of differential sites	No. of protein coding genes (gene proximal diff. sites)
U5 NSC	(FDR < 0.01)
cJun increased in Fbw7-/-	2797	33917	0.082466	1238
cJun decreased in Fbw7-/-	1389	33917	0.0409529	669
