# Supplementary material for: Global and context-specific transcriptional consequences of oncogenic Fbw7 mutations
Source: eLife. 2022 Feb 28;11:e74338. doi: 10.7554/eLife.74338 (PMC8926403; doi:10.7554/eLife.74338)
Supplement: Figure 3—source data 2. — This Excel file includes lists of peaks with increased and decreased Jun and Myc signal in Hct116 Fbw7−/− and Fbw7R/+ relative to WT. Fold change and FDR listed for each peak. WT, wild-type. [file elife-74338-fig3-data2.xlsx]

## Sheet: Hct116 Jun increased Fbw7-Del
Geneid	Chr	Start	End	Strand	Length	Del_vs_WT.logFC	Del_vs_WT.logCPM	Del_vs_WT.PValue	Del_vs_WT.FDR	CPM.TMMnormalized.Sample_DJ_HsSc_10WJ_1019	CPM.TMMnormalized.Sample_DJ_HsSc_11NJ_1019	CPM.TMMnormalized.Sample_DJ_HsSc_12RJ_1019	CPM.TMMnormalized.Sample_DJ_HsSc_13WJ_1019	CPM.TMMnormalized.Sample_DJ_HsSc_14NJ_1019	CPM.TMMnormalized.Sample_DJ_HsSc_15RJ_1019	CPM.TMMnormalized.Sample_DJ_HsSc_16WJ_1019	CPM.TMMnormalized.Sample_DJ_HsSc_17NJ_1019	CPM.TMMnormalized.Sample_DJ_HsSc_18RJ_1019	FPKM.TMMnormalized.Sample_DJ_HsSc_10WJ_1019	FPKM.TMMnormalized.Sample_DJ_HsSc_11NJ_1019	FPKM.TMMnormalized.Sample_DJ_HsSc_12RJ_1019	FPKM.TMMnormalized.Sample_DJ_HsSc_13WJ_1019	FPKM.TMMnormalized.Sample_DJ_HsSc_14NJ_1019	FPKM.TMMnormalized.Sample_DJ_HsSc_15RJ_1019	FPKM.TMMnormalized.Sample_DJ_HsSc_16WJ_1019	FPKM.TMMnormalized.Sample_DJ_HsSc_17NJ_1019	FPKM.TMMnormalized.Sample_DJ_HsSc_18RJ_1019
chr6:73789059:73790148	chr6	73789059	73790148	.	1090	5.98451	5.87645	2.61911e-17	7.5598e-13	4.55645	149.327	2.88583	1.55488	196.93	0	1.7832	160.542	0	4.18023	136.997	2.64755	1.42649	180.669	0	1.63597	147.287	0
chr9:97690666:97692020	chr9	97690666	97692020	.	1355	3.65519	5.6441	2.65263e-11	1.86745e-08	2.73387	48.8706	73.1077	2.33231	60.849	92.6442	8.02442	55.5724	92.1799	2.01762	36.0668	53.954	1.72126	44.907	68.3721	5.92208	41.0128	68.0294
chr8:135904122:135905782	chr8	135904122	135905782	.	1661	2.56095	6.77584	1.43116e-13	2.58181e-10	20.9597	145.254	163.53	24.1006	149.357	159.731	31.2061	155.603	123.948	12.6187	87.4498	98.453	14.5097	89.9197	96.1658	18.7875	93.6801	74.6226
chr9:4225137:4226163	chr9	4225137	4226163	.	1027	2.60741	6.80759	2.89609e-14	7.59934e-11	22.7823	172.404	140.444	28.7652	163.739	124.59	29.4229	160.542	152.592	22.1833	167.872	136.751	28.009	159.434	121.315	28.6493	156.322	148.58
chr2:167991033:167991790	chr2	167991033	167991790	.	758	4.45931	4.9582	2.23357e-09	6.199e-07	1.82258	21.7202	68.298	0.777438	33.1904	68.1521	0.891602	26.2425	46.3503	2.40446	28.6547	90.1029	1.02564	43.7868	89.9104	1.17626	34.6207	61.1482
chr3:106447000:106447778	chr3	106447000	106447778	.	779	2.28654	6.43992	1.51143e-10	7.03643e-08	29.1613	93.6686	135.634	13.2164	119.485	143.758	21.3985	96.6342	116.136	37.4343	120.242	174.113	16.9659	153.383	184.542	27.4691	124.049	149.084
chr4:4428573:4430134	chr4	4428573	4430134	.	1562	3.74634	5.44952	8.96238e-09	2.00989e-06	0	50.2281	68.298	6.99694	26.5523	115.007	0.891602	40.1356	72.9106	0	32.1563	43.7247	4.47948	16.9989	73.6278	0.570808	25.695	46.6778
chr1:68444600:68446023	chr1	68444600	68446023	.	1424	2.07124	6.9066	3.78234e-11	2.42608e-08	27.3387	181.907	185.655	35.7621	157.101	159.731	44.5801	120.407	156.237	19.1985	127.744	130.376	25.1139	110.324	112.171	31.3063	84.5553	109.717
chr3:62897005:62897848	chr3	62897005	62897848	.	844	9.57207	5.17785	2.12888e-14	6.1448e-11	0	57.0156	45.2113	0	97.3584	23.4273	0	55.8811	35.4137	0	67.5541	53.5679	0	115.354	27.7574	0	66.2098	41.9594
chrX:140499452:140500952	chrX	140499452	140500952	.	1501	4.26812	5.93843	4.49377e-14	9.97755e-11	0.91129	184.622	15.3911	10.8841	138.293	5.32438	12.4824	157.764	15.1029	0.607122	122.999	10.2539	7.25125	92.134	3.54722	8.31608	105.106	10.0619
chr17:17054260:17055755	chr17	17054260	17055755	.	1496	2.0884	5.4023	9.9587e-06	0.000539302	3.64516	32.5804	93.3085	9.32925	21.0206	102.228	6.24122	29.9473	69.7859	2.4366	21.7783	62.372	6.23613	14.0512	68.3343	4.17194	20.0183	46.6483
chr4:96426202:96427902	chr4	96426202	96427902	.	1701	1.90636	6.69286	1.02474e-09	3.25033e-07	33.7177	147.969	163.53	28.7652	94.0394	173.575	33.8809	120.407	123.427	19.8223	86.9895	96.1378	16.9108	55.2848	102.043	19.9182	70.7859	72.5616
chr12:85486304:85487478	chr12	85486304	85487478	.	1175	1.88122	6.56061	4.10558e-09	1.0487e-06	21.871	108.601	146.215	33.4298	74.1252	144.823	30.3145	130.286	145.301	18.6136	92.4266	124.439	28.4509	63.0852	123.254	25.7996	110.882	123.66
chr6:106040296:106041253	chr6	106040296	106041253	.	958	3.42082	5.40841	2.19026e-09	6.13784e-07	1.82258	35.2954	73.1077	2.33231	38.7221	80.9306	8.91602	62.6733	63.5364	1.90248	36.8428	76.3128	2.43457	40.4197	84.4787	9.30692	65.421	66.3219
chr8:105187717:105188648	chr8	105187717	105188648	.	932	3.29799	6.42616	6.63728e-15	2.39473e-11	10.9355	191.41	100.042	19.4359	125.017	88.3847	15.1572	140.475	72.3899	11.7333	205.375	107.341	20.854	134.138	94.8334	16.2631	150.724	77.6715
chr9:72513322:72514338	chr9	72513322	72514338	.	1017	1.05018	6.85612	1.85163e-05	0.000874719	51.0322	105.886	177.96	47.4237	111.741	201.262	55.2794	101.574	177.59	50.1792	104.116	174.985	46.631	109.873	197.897	54.3553	99.8761	174.621
chr4:145630230:145632070	chr4	145630230	145632070	.	1841	1.68992	6.99544	1.95495e-09	5.58689e-07	60.1451	119.461	179.883	45.0914	181.441	182.094	40.1221	165.173	161.445	32.6698	64.8894	97.7096	24.4929	98.5555	98.9103	21.7937	89.7194	87.6942
chr1:5671229:5672583	chr1	5671229	5672583	.	1355	2.0861	7.20127	7.52648e-13	1.0345e-09	93.8629	298.653	40.4016	67.6371	297.607	50.0492	60.629	343.623	58.8493	69.2715	220.408	29.8167	49.9167	219.636	36.9367	44.7446	253.596	43.4312
chr3:106483967:106484666	chr3	106483967	106484666	.	700	3.67236	5.40608	4.82999e-11	2.84516e-08	6.37903	66.5183	42.3255	2.33231	48.6792	55.3735	6.24122	73.479	65.6196	9.1129	95.0261	60.465	3.33188	69.5417	79.1051	8.91602	104.97	93.7423
chr8:74432331:74433617	chr8	74432331	74433617	.	1287	2.42133	6.51057	2.03956e-12	2.3548e-09	36.4516	139.824	50.983	37.317	242.29	47.9194	29.4229	172.583	51.5582	28.3229	108.643	39.6138	28.9954	188.259	37.2334	22.8616	134.097	40.0608
chr7:111570982:111572611	chr7	111570982	111572611	.	1630	3.81722	6.67157	3.73262e-15	1.53912e-11	1.82258	206.342	105.814	17.8811	199.142	80.9306	22.2901	197.591	73.9522	1.11815	126.59	64.9164	10.97	122.173	49.6507	13.6749	121.221	45.3695
chr10:130426810:130428416	chr10	130426810	130428416	.	1607	2.59072	6.33804	2.10154e-11	1.55536e-08	20.9597	124.891	70.2219	28.7652	128.336	109.682	10.6992	116.702	105.2	13.0427	77.7171	43.6975	17.8999	79.8607	68.2528	6.65789	72.621	65.4634
chr3:106279019:106280149	chr3	106279019	106280149	.	1131	4.29116	5.11763	3.44154e-11	2.31015e-08	1.82258	74.6633	34.63	3.88719	59.7427	34.076	2.67481	40.7531	49.4751	1.61148	66.0153	30.6189	3.43695	52.8229	30.1291	2.36499	36.0328	43.7445
chr3:153618557:153619893	chr3	153618557	153619893	.	1337	1.43453	5.62376	0.000207425	0.00542707	10.9355	52.9431	94.2705	17.8811	23.2333	78.8008	14.2656	41.6793	95.8254	8.17912	39.5984	70.5089	13.374	17.3772	58.9385	10.6699	31.1737	71.672
chr9:18393106:18394290	chr9	18393106	18394290	.	1185	3.01497	5.71617	9.31259e-12	7.67996e-09	12.7581	116.746	17.315	10.1067	126.123	21.2975	21.3985	114.85	20.8316	10.7663	98.5201	14.6118	8.52885	106.433	17.9726	18.0578	96.9195	17.5794
chr12:115593517:115594266	chr12	115593517	115594266	.	750	4.82149	4.9787	9.75349e-12	7.82013e-09	3.64516	81.4509	3.84777	0.777438	86.295	6.38926	4.45801	83.976	1.04158	4.86021	108.601	5.13037	1.03658	115.06	8.51901	5.94402	111.968	1.38877
chr7:83671499:83672301	chr7	83671499	83672301	.	803	2.70154	5.16092	1.58057e-07	2.01014e-05	5.46774	36.6529	59.6405	5.44207	47.5729	73.4764	7.13282	35.1958	40.1009	6.80914	45.645	74.2721	6.77717	59.2439	91.5024	8.88271	43.8304	49.9388
chr1:86088444:86089338	chr1	86088444	86089338	.	895	3.59616	6.00199	3.62603e-14	8.72181e-11	11.8468	108.601	44.2494	11.6616	117.273	71.3467	6.24122	136.152	55.7246	13.2366	121.342	49.4407	13.0297	131.031	79.717	6.97343	152.125	62.2621
chr7:17572338:17573566	chr7	17572338	17573566	.	1229	3.41683	5.6183	4.45012e-11	2.67601e-08	2.73387	58.3732	45.2113	12.439	78.5505	62.8277	6.24122	96.6342	63.5364	2.22447	47.4965	36.7871	10.1212	63.9142	51.121	5.07829	78.6283	51.6977
chr18:73255664:73256928	chr18	73255664	73256928	.	1265	2.29499	6.09256	3.55295e-07	3.89933e-05	33.7177	44.798	132.748	8.55182	96.2521	119.266	5.34961	86.4459	73.9522	26.6543	35.4134	104.939	6.76033	76.0886	94.2815	4.22894	68.3367	58.4603
chr6:161458941:161460000	chr6	161458941	161460000	.	1060	2.19418	7.22501	1.42412e-13	2.58181e-10	61.9677	238.923	138.52	55.1981	224.588	152.277	41.0137	259.646	160.924	58.4601	225.399	130.679	52.0737	211.876	143.658	38.6922	244.95	151.815
chr1:205902604:205903459	chr1	205902604	205903459	.	856	2.55343	5.2477	1.26938e-06	0.000107133	7.29032	17.6477	58.6786	2.33231	44.2538	61.7628	10.6992	52.1763	70.8275	8.51673	20.6165	68.5497	2.72467	51.6984	72.1528	12.4991	60.9536	82.7424
chr12:31624307:31625500	chr12	31624307	31625500	.	1194	2.87315	4.78814	1.06427e-05	0.000567822	0	21.7202	39.4397	6.2195	25.4459	42.595	2.67481	22.5377	72.3899	0	18.1912	33.0316	5.20896	21.3115	35.6742	2.24021	18.8758	60.628
chr8:25249997:25250927	chr8	25249997	25250927	.	931	3.34065	4.40458	2.31413e-05	0.00103846	2.73387	24.4353	50.0211	1.55488	11.0635	44.7248	0	12.0407	32.8098	2.93649	26.2463	53.7283	1.67011	11.8834	48.0395	0	12.9331	35.2415
chr9:4292476:4293810	chr9	4292476	4293810	.	1335	1.06419	6.53521	5.73413e-05	0.00204839	36.4516	101.814	155.835	47.4237	78.5505	129.915	46.3633	92.9294	132.281	27.3046	76.2649	116.73	35.5234	58.8394	97.3145	34.7291	69.61	99.0867
chr9:18237943:18239242	chr9	18237943	18239242	.	1300	3.35827	5.44375	3.75289e-11	2.42608e-08	9.1129	105.886	7.69555	13.2164	119.485	12.7785	8.91602	100.648	3.12474	7.00992	81.4509	5.91965	10.1665	91.9118	9.82962	6.85848	77.4213	2.40365
chr4:96225776:96226816	chr4	96225776	96226816	.	1041	3.00202	5.66882	2.45609e-10	9.98486e-08	16.4032	62.4457	63.4883	7.77438	100.677	63.8926	5.34961	73.479	52.079	15.7572	59.9863	60.9878	7.46818	96.7122	61.3761	5.13892	70.585	50.0279
chr4:36552948:36554465	chr4	36552948	36554465	.	1518	2.29906	5.39299	4.67455e-07	4.87098e-05	6.37903	38.0104	78.8794	9.32925	37.6157	56.4384	13.374	64.5257	58.3285	4.20226	25.0398	51.9627	6.14575	24.7798	37.1795	8.8103	42.507	38.4246
chr8:104991941:104993448	chr8	104991941	104993448	.	1508	3.05176	6.20777	2.48234e-13	3.98058e-10	10.0242	138.467	72.1458	13.9939	123.911	68.1521	24.0733	137.387	64.578	6.64734	91.8213	47.842	9.27976	82.1689	45.1937	15.9637	91.1056	42.8236
chr18:76253112:76254798	chr18	76253112	76254798	.	1687	3.44966	5.66977	4.12929e-11	2.53591e-08	14.5806	108.601	11.5433	13.2164	98.4648	10.6488	4.45801	146.341	34.3722	8.64294	64.3754	6.84251	7.83429	58.3668	6.31225	2.64257	86.746	20.3747
chr2:12458090:12459390	chr2	12458090	12459390	.	1301	4.0439	4.77104	8.94465e-08	1.28195e-05	0	25.7928	42.3255	5.44207	37.6157	30.8814	0	36.7395	51.5582	0	19.8254	32.5331	4.18299	28.913	23.7367	0	28.2394	39.6297
chr4:148260941:148262020	chr4	148260941	148262020	.	1080	1.82314	5.95442	6.5461e-07	6.42675e-05	11.8468	73.3058	87.5369	16.3262	77.4442	90.5145	32.0977	64.217	92.1799	10.9692	67.8758	81.0526	15.1168	71.7076	83.8097	29.7201	59.4602	85.3518
chr5:45793822:45794520	chr5	45793822	45794520	.	699	2.82072	4.6844	5.08258e-06	0.000316423	1.82258	19.0052	51.9449	6.2195	29.8713	41.5302	1.7832	24.0814	41.6632	2.60741	27.1891	74.3132	8.89772	42.7344	59.4137	2.55108	34.4512	59.604
chr2:235410771:235411770	chr2	235410771	235411770	.	1000	1.41734	6.05517	2.4278e-05	0.0010764	35.5403	52.9431	111.585	17.1036	61.9554	119.266	22.2901	80.2712	83.8472	35.5403	52.9431	111.585	17.1036	61.9554	119.266	22.2901	80.2712	83.8472
chr6:106056381:106057466	chr6	106056381	106057466	.	1086	2.99994	5.06593	2.28336e-07	2.69007e-05	1.82258	36.6529	67.336	2.33231	34.2967	45.7897	10.6992	46.619	42.184	1.67825	33.7504	62.0037	2.14762	31.5808	42.1636	9.85196	42.9273	38.8435
chr7:104944628:104945316	chr7	104944628	104945316	.	689	3.361	4.93062	1.8948e-08	3.82458e-06	1.82258	55.6581	38.4777	6.2195	36.5094	42.595	3.56641	34.2696	43.7464	2.64525	80.781	55.8458	9.02686	52.989	61.8215	5.17621	49.7382	63.4926
chr3:124856103:124856884	chr3	124856103	124856884	.	782	3.32209	5.26441	7.13051e-11	3.8833e-08	6.37903	99.0986	10.5814	11.6616	70.8061	10.6488	8.91602	103.426	10.9366	8.15733	126.725	13.5312	14.9125	90.5449	13.6173	11.4016	132.259	13.9854
chr16:51572579:51573618	chr16	51572579	51573618	.	1040	4.11624	5.12807	7.37705e-11	3.94317e-08	10.9355	82.8084	0.961944	3.10975	97.3584	6.38926	1.7832	93.5468	5.2079	10.5149	79.6235	0.924946	2.99015	93.6139	6.14351	1.71462	89.9489	5.0076
chr9:72645857:72646863	chr9	72645857	72646863	.	1007	1.62102	7.3496	7.40637e-10	2.40199e-07	56.5	166.974	205.856	75.4115	241.183	174.64	83.8106	251.619	197.38	56.1072	165.814	204.425	74.8873	239.507	173.426	83.228	249.87	196.007
chr6:75905448:75906992	chr6	75905448	75906992	.	1545	1.5755	6.78115	4.10339e-08	6.84626e-06	50.121	171.047	135.634	52.8658	110.635	168.25	34.7725	132.447	122.386	32.4407	110.71	87.789	34.2173	71.6081	108.9	22.5065	85.7265	79.2141
chr9:44539634:44540531	chr9	44539634	44540531	.	898	1.90197	5.34592	1.21551e-05	0.000626509	6.37903	43.4405	68.298	9.32925	34.2967	63.8926	16.9404	44.1492	65.6196	7.1036	48.3747	76.0557	10.3889	38.1923	71.1498	18.8646	49.1639	73.073
chr11:68842878:68843669	chr11	68842878	68843669	.	792	5.16752	4.5065	6.80845e-09	1.63766e-06	2.73387	24.4353	27.8964	0	44.2538	33.0112	0	33.6522	25.5187	3.45186	30.8526	35.2227	0	55.876	41.6807	0	42.4901	32.2206
chr8:142027489:142028574	chr8	142027489	142028574	.	1086	3.18604	5.52675	1.37413e-10	6.50211e-08	9.1129	93.6686	9.61944	9.32925	107.316	5.32438	17.832	127.508	20.3108	8.39125	86.251	8.85768	8.59047	98.8172	4.90274	16.4199	117.41	18.7024
chr10:4822845:4823329	chr10	4822845	4823329	.	485	3.50283	3.98103	0.000424182	0.00932097	0	4.07255	52.9069	0.777438	9.95711	25.557	0.891602	7.71839	27.0811	0	8.397	109.086	1.60296	20.5301	52.6949	1.83836	15.9142	55.8373
chr10:122175167:122176353	chr10	122175167	122176353	.	1187	3.74541	5.05276	1.59137e-10	7.19282e-08	6.37903	76.0209	15.3911	3.10975	67.4871	11.7136	8.02442	90.1507	6.77027	5.37408	64.0445	12.9664	2.61984	56.8552	9.86827	6.76025	75.9484	5.70369
chr13:53360751:53361750	chr13	53360751	53361750	.	1000	2.61084	4.8508	6.34647e-05	0.00220174	0	32.5804	57.7166	1.55488	14.3825	43.6599	9.80763	23.4639	62.4948	0	32.5804	57.7166	1.55488	14.3825	43.6599	9.80763	23.4639	62.4948
chr5:59492146:59492795	chr5	59492146	59492795	.	650	4.63499	4.88934	1.77747e-10	7.65744e-08	0	58.3732	12.5053	2.33231	68.5934	8.51901	6.24122	90.1507	4.68711	0	89.8049	19.2389	3.58817	105.528	13.1062	9.60187	138.693	7.21094
chr8:94342169:94343983	chr8	94342169	94343983	.	1815	3.38886	5.38978	2.3544e-10	9.8084e-08	4.55645	73.3058	10.5814	10.8841	92.933	6.38926	12.4824	126.89	22.394	2.51044	40.3889	5.82996	5.99677	51.2028	3.52025	6.87737	69.912	12.3383
chr9:18267999:18268664	chr9	18267999	18268664	.	666	3.59643	5.30948	2.3787e-10	9.8084e-08	6.37903	119.461	23.0866	6.2195	102.89	10.6488	10.6992	65.1432	5.2079	9.57812	179.371	34.6646	9.33859	154.49	15.9891	16.0649	97.8126	7.81967
chr11:28588086:28588630	chr11	28588086	28588630	.	545	5.19377	3.96489	3.16366e-06	0.000217419	0.91129	9.50261	22.1247	0	19.9142	25.557	0	12.0407	35.9345	1.67209	17.436	40.5958	0	36.5399	46.8936	0	22.093	65.9349
chr2:109209936:109212144	chr2	109209936	109212144	.	2209	1.12021	6.52367	2.4926e-05	0.00109341	38.2742	97.7411	131.786	41.2042	89.614	142.693	53.4961	100.956	119.261	17.3265	44.2468	59.6588	18.6529	40.5677	64.5964	24.2174	45.7023	53.9887
chr4:157593906:157594786	chr4	157593906	157594786	.	881	3.70414	4.75257	2.45519e-08	4.7643e-06	5.46774	42.083	27.8964	2.33231	43.1475	45.7897	0.891602	31.491	32.289	6.20629	47.7673	31.6644	2.64735	48.9756	51.9746	1.01203	35.7446	36.6504
chr5:134475615:134478014	chr5	134475615	134478014	.	2400	1.81243	6.98059	5.42361e-10	1.90911e-07	41.0081	233.493	60.6024	70.7468	257.779	77.7359	92.7267	229.39	61.4533	17.0867	97.2886	25.251	29.4779	107.408	32.39	38.6361	95.5793	25.6055
chr4:105981617:105982900	chr4	105981617	105982900	.	1284	2.40824	5.36008	1.40448e-07	1.84268e-05	7.29032	52.9431	63.4883	12.439	36.5094	59.6331	9.80763	66.9956	46.3503	5.67782	41.2329	49.4457	9.6877	28.4341	46.4432	7.63834	52.1772	36.0984
chr11:13156749:13157412	chr11	13156749	13157412	.	664	5.21057	4.01135	7.29414e-06	0.00042533	0	6.78758	40.4016	0.777438	14.3825	44.7248	0	18.5241	7.81186	0	10.2223	60.8458	1.17084	21.6604	67.3566	0	27.8978	11.7648
chr6:108930113:108931451	chr6	108930113	108931451	.	1339	1.49541	5.78516	0.000102402	0.00316121	10.0242	48.8706	123.129	24.1006	76.3378	70.2818	22.2901	38.9007	70.8275	7.48633	36.4978	91.9558	17.9989	57.0111	52.4883	16.6468	29.052	52.8958
chr12:67217606:67218810	chr12	67217606	67218810	.	1205	4.73604	4.73248	6.53519e-10	2.16071e-07	0	54.3006	0.961944	6.2195	66.3807	4.2595	0.891602	85.5197	4.68711	0	45.0627	0.798293	5.16141	55.0877	3.53486	0.739919	70.9707	3.88972
chr4:96431514:96432770	chr4	96431514	96432770	.	1257	2.45123	5.56998	1.25235e-08	2.65793e-06	9.1129	63.8032	50.0211	10.1067	75.2315	55.3735	17.832	64.5257	68.2235	7.24972	50.7583	39.794	8.04033	59.85	44.0521	14.1862	51.3331	54.2749
chr8:128295609:128296646	chr8	128295609	128296646	.	1038	3.35388	4.66614	1.50758e-06	0.000121211	0	28.5078	41.3636	6.99694	34.2967	35.1409	0.891602	25.9338	42.184	0	27.4642	39.8493	6.74079	33.0411	33.8544	0.858962	24.9844	40.6397
chr2:101371212:101372565	chr2	101371212	101372565	.	1354	4.1463	4.37436	2.68556e-07	3.08828e-05	0	16.2902	31.7441	1.55488	38.7221	29.8165	2.67481	25.0076	27.6019	0	12.0312	23.4447	1.14836	28.5983	22.0211	1.97549	18.4694	20.3854
chr2:157912322:157913309	chr2	157912322	157913309	.	988	3.08557	4.89699	8.01646e-07	7.51256e-05	0	33.9379	46.1733	7.77438	28.765	56.4384	4.45801	44.7666	32.289	0	34.3501	46.7341	7.8688	29.1144	57.1239	4.51216	45.3104	32.6812
chr3:62907806:62908642	chr3	62907806	62908642	.	837	6.15052	4.53755	8.66147e-11	4.38604e-08	0	51.5856	22.1247	1.55488	43.1475	12.7785	0	45.3841	19.79	0	61.6315	26.4333	1.85768	51.5502	15.267	0	54.2223	23.644
chr21:39649226:39650270	chr21	39649226	39650270	.	1045	3.96461	5.32647	1.23745e-09	3.88237e-07	0	109.959	7.69555	15.5488	99.5711	0	3.56641	106.822	5.72869	0	105.224	7.36416	14.8792	95.2834	0	3.41283	102.222	5.482
chr13:102102006:102103385	chr13	102102006	102103385	.	1380	0.710391	8.0601	0.000140703	0.00403302	275.21	420.83	115.433	238.673	385.008	144.823	255.89	451.371	102.075	199.427	304.949	83.6473	172.952	278.991	104.944	185.427	327.081	73.9673
chr21:32090354:32091296	chr21	32090354	32091296	.	943	3.52552	5.19349	1.74883e-10	7.64822e-08	7.29032	70.5908	38.4777	3.10975	55.3173	37.2707	6.24122	65.7606	32.8098	7.73099	74.8577	40.8035	3.29772	58.661	39.5235	6.61847	69.7356	34.793
chr8:105987025:105988580	chr8	105987025	105988580	.	1556	3.95697	4.97944	1.67956e-09	5.10305e-07	0	58.3732	7.69555	10.8841	89.614	6.38926	3.56641	88.2983	4.68711	0	37.5149	4.94572	6.99494	57.5925	4.10621	2.29204	56.747	3.01228
chr7:154451779:154456166	chr7	154451779	154456166	.	4388	0.716699	8.3284	7.96169e-05	0.0026148	331.71	534.861	162.568	314.862	419.305	145.888	274.614	557.576	138.53	75.5947	121.892	37.0484	71.7553	95.5572	33.247	62.5829	127.068	31.5702
chr12:70547707:70548305	chr12	70547707	70548305	.	599	4.13523	4.66877	1.72273e-09	5.17967e-07	6.37903	36.6529	5.77166	1.55488	57.53	4.2595	2.67481	89.2245	6.24948	10.6495	61.1902	9.63549	2.59579	96.0434	7.11102	4.46545	148.956	10.4332
chr3:16024091:16024955	chr3	16024091	16024955	.	865	3.82647	4.6566	1.82985e-09	5.44503e-07	4.55645	74.6633	3.84777	3.88719	67.4871	6.38926	4.45801	46.0016	6.77027	5.26757	86.316	4.44829	4.49386	78.0197	7.38642	5.15377	53.181	7.82691
chr2:230319552:230320266	chr2	230319552	230320266	.	715	2.01336	6.45315	1.8749e-09	5.46638e-07	61.9677	149.327	63.4883	31.875	144.931	58.5682	23.1817	174.436	67.182	86.6681	208.849	88.7948	44.5804	202.701	81.9135	32.4219	243.966	93.9608
chr8:105348934:105349824	chr8	105348934	105349824	.	891	1.96877	6.32835	1.91718e-09	5.53374e-07	37.3629	105.886	43.2875	32.6524	167.058	64.9574	39.2305	152.207	66.6612	41.9337	118.84	48.583	36.6469	187.495	72.904	44.0298	170.827	74.8161
chr20:49982143:49983585	chr20	49982143	49983585	.	1443	1.8577	7.00619	3.93173e-11	2.46707e-08	52.8548	175.119	136.596	55.1981	189.185	151.212	52.6045	215.806	115.095	36.6284	121.358	94.6611	38.2523	131.105	104.79	36.455	149.554	79.7607
chr1:232512680:232513860	chr1	232512680	232513860	.	1181	2.73239	4.94067	1.14368e-06	9.94313e-05	1.82258	21.7202	50.983	9.32925	46.4665	36.2058	5.34961	43.5317	45.8296	1.54325	18.3914	43.1694	7.89945	39.3451	30.6569	4.52973	36.86	38.8057
chr8:106081954:106082419	chr8	106081954	106082419	.	466	6.11434	4.6342	2.9247e-09	8.03986e-07	0	52.9431	10.5814	0	74.1252	0	2.67481	69.7742	0	0	113.612	22.7068	0	159.067	0	5.73993	149.73	0
chr8:111860237:111861409	chr8	111860237	111861409	.	1173	2.68131	5.55103	2.97876e-09	8.11123e-07	13.6694	100.456	16.353	27.9878	105.103	7.45413	8.02442	117.937	11.4574	11.6533	85.6404	13.9412	23.86	89.6017	6.35476	6.84094	100.543	9.76759
chr8:131203915:131204436	chr8	131203915	131204436	.	522	2.60236	4.61443	1.10291e-05	0.000581983	2.73387	20.3627	38.4777	6.2195	19.9142	35.1409	3.56641	35.8133	42.184	5.2373	39.0091	73.7121	11.9148	38.1498	67.3197	6.8322	68.6079	80.8123
chr1:20085922:20086649	chr1	20085922	20086649	.	728	3.32826	4.13338	5.42741e-05	0.00196558	2.73387	16.2902	28.8583	1.55488	18.8079	42.595	0	11.4232	24.4771	3.75532	22.3766	39.6405	2.13582	25.835	58.5097	0	15.6912	33.6225
chr2:19696073:19697507	chr2	19696073	19697507	.	1435	4.6579	4.56033	4.39356e-09	1.11242e-06	0	35.2954	8.65749	3.10975	85.1886	1.06488	3.56641	57.4248	4.68711	0	24.5961	6.0331	2.16707	59.3649	0.742074	2.4853	40.0173	3.26628
chr12:52834653:52835641	chr12	52834653	52835641	.	989	1.59188	6.08556	1.61779e-06	0.000127237	30.0726	95.0261	119.281	27.9878	63.0617	74.5413	23.1817	87.0634	78.1186	30.407	96.083	120.608	28.2991	63.7631	75.3704	23.4395	88.0317	78.9874
chr5:111333051:111334066	chr5	111333051	111334066	.	1016	2.72567	5.37133	5.54069e-09	1.37868e-06	9.1129	105.886	11.5433	13.2164	98.4648	23.4273	18.7237	71.6266	11.4574	8.96939	104.219	11.3615	13.0083	96.9141	23.0583	18.4288	70.4986	11.277
chr2:157421161:157422212	chr2	157421161	157422212	.	1052	2.67377	4.7899	1.8918e-06	0.000144077	8.20161	39.3679	34.63	3.88719	27.6586	35.1409	3.56641	33.6522	48.9543	7.79621	37.422	32.9182	3.69505	26.2915	33.4039	3.39012	31.9887	46.5345
chr2:196311995:196312671	chr2	196311995	196312671	.	677	4.17098	3.9814	6.16634e-05	0.00215479	0	2.71503	30.7822	0	9.95711	20.2326	1.7832	20.0678	38.5385	0	4.01039	45.4685	0	14.7077	29.8857	2.63398	29.6422	56.9254
chr10:114391230:114392613	chr10	114391230	114392613	.	1384	1.50086	6.35604	8.35553e-07	7.77981e-05	30.0726	74.6633	119.281	45.8688	116.166	91.5793	30.3145	109.292	105.72	21.7287	53.9475	86.1857	33.1422	83.9352	66.17	21.9035	78.9684	76.3876
chr9:18490453:18491066	chr9	18490453	18491066	.	614	5.36342	4.28763	8.47424e-09	1.9568e-06	1.82258	40.7255	0.961944	1.55488	54.2109	0	0	55.8811	5.72869	2.96837	66.3281	1.56668	2.53237	88.2914	0	0	91.0116	9.33012
chrX:132325448:132326289	chrX	132325448	132326289	.	842	3.28471	4.97012	3.37965e-08	5.98468e-06	3.64516	36.6529	17.315	6.99694	61.9554	52.1789	3.56641	44.4579	42.184	4.32917	43.5308	20.5641	8.30991	73.5812	61.9702	4.23564	52.8004	50.0998
chr6:147384485:147385449	chr6	147384485	147385449	.	965	1.29293	6.03626	0.000186257	0.00498852	16.4032	81.4509	136.596	33.4298	39.8284	75.6062	31.2061	77.1839	85.4096	16.9982	84.4051	141.55	34.6423	41.273	78.3484	32.3379	79.9833	88.5074
chr2:91786610:91788164	chr2	91786610	91788164	.	1555	1.62112	6.55264	8.67407e-09	1.98705e-06	54.6774	181.907	56.7547	48.9786	140.506	60.6979	56.171	169.187	63.5364	35.1623	116.982	36.4982	31.4975	90.3575	39.034	36.1228	108.802	40.8594
chr8:121839572:121840676	chr8	121839572	121840676	.	1105	2.61354	5.54591	7.39693e-09	1.75004e-06	11.8468	62.4457	53.8688	16.3262	96.2521	48.9843	6.24122	57.4248	55.2038	10.7211	56.512	48.7501	14.7748	87.1059	44.3297	5.64816	51.9681	49.9582
chr4:153617951:153618553	chr4	153617951	153618553	.	603	2.12535	5.29331	6.61261e-06	0.000392729	19.1371	57.0156	58.6786	3.88719	42.0411	50.0492	8.91602	40.4443	60.4117	31.7365	94.5533	97.311	6.44642	69.72	83.0003	14.7861	67.0719	100.185
chrX:65854771:65855834	chrX	65854771	65855834	.	1064	6.78394	4.04011	9.24721e-09	2.05316e-06	0.91129	50.2281	0	0	24.3396	5.32438	0	49.7064	3.12474	0.856476	47.2068	0	0	22.8756	5.00412	0	46.7165	2.93679
chr8:18984127:18986663	chr8	18984127	18986663	.	2537	1.17202	8.0873	9.51739e-09	2.09702e-06	185.903	401.825	205.856	172.591	413.773	221.494	189.02	417.41	227.065	73.2768	158.386	81.1415	68.0296	163.095	87.3056	74.5052	164.529	89.5012
chr6:55733676:55734498	chr6	55733676	55734498	.	823	1.86247	6.71592	9.32807e-10	2.99162e-07	27.3387	152.042	103.89	53.6432	162.633	104.358	46.3633	151.898	130.718	33.2183	184.741	126.233	65.1801	197.61	126.802	56.3345	184.566	158.832
chr1:203675318:203676189	chr1	203675318	203676189	.	872	2.23158	4.98642	8.98879e-06	0.000502661	6.37903	17.6477	46.1733	7.77438	44.2538	42.595	8.91602	44.7666	51.0375	7.3154	20.2382	52.951	8.91557	50.7498	48.8475	10.2248	51.3379	58.5292
chr17:41545785:41546946	chr17	41545785	41546946	.	1162	1.7775	6.32272	1.0634e-08	2.29059e-06	41.0081	145.254	68.298	35.7621	110.635	52.1789	44.5801	157.764	51.5582	35.2909	125.004	58.7762	30.7764	95.2105	44.9044	38.365	135.769	44.3703
chr2:75752727:75753384	chr2	75752727	75753384	.	658	3.4026	4.91731	1.16176e-08	2.48392e-06	8.20161	81.4509	15.3911	3.10975	46.4665	6.38926	8.91602	84.2848	4.16632	12.4645	123.786	23.3907	4.72607	70.6178	9.71011	13.5502	128.092	6.3318
chr16:28436543:28437118	chr16	28436543	28437118	.	576	2.93867	4.53924	1.90484e-06	0.000144687	3.64516	36.6529	35.5919	3.88719	21.0206	28.7516	3.56641	29.6386	33.3306	6.3284	63.6335	61.7915	6.74859	36.494	49.9161	6.19168	51.4559	57.8656
chr6:45575506:45576988	chr6	45575506	45576988	.	1483	1.73665	6.3082	1.83716e-08	3.7877e-06	58.3226	143.897	32.7061	36.5396	164.845	27.6868	43.6885	151.898	41.1424	39.3274	97.0308	22.054	24.639	111.157	18.6694	29.4596	102.426	27.7427
chr1:203638839:203639369	chr1	203638839	203639369	.	531	1.84638	4.84501	0.000264306	0.00649272	8.20161	16.2902	32.7061	7.77438	29.8713	44.7248	6.24122	32.4172	64.0572	15.4456	30.6783	61.5934	14.641	56.2549	84.2275	11.7537	61.0494	120.635
chr8:70554924:70556605	chr8	70554924	70556605	.	1682	2.91429	5.00786	2.09029e-08	4.18987e-06	9.1129	63.8032	11.5433	11.6616	89.614	12.7785	8.02442	66.9956	4.68711	5.4179	37.9329	6.86286	6.93316	53.2782	7.59721	4.77076	39.8309	2.78663
chr16:30193769:30194438	chr16	30193769	30194438	.	670	6.6722	3.84463	2.13768e-08	4.25531e-06	0	43.4405	0	0.777438	30.9777	0	0	39.8269	1.04158	0	64.8366	0	1.16036	46.2353	0	0	59.4431	1.5546
chr9:41819452:41820201	chr9	41819452	41820201	.	750	2.24669	4.70613	3.76331e-05	0.001488	5.46774	28.5078	29.8202	5.44207	30.9777	57.5033	6.24122	23.7726	35.4137	7.29032	38.0104	39.7603	7.25609	41.3036	76.6711	8.32162	31.6968	47.2183
chr8:127518194:127519142	chr8	127518194	127519142	.	949	1.21787	7.69081	2.4594e-08	4.7643e-06	134.871	333.949	165.454	140.716	306.458	192.743	120.366	284.037	169.257	142.119	351.895	174.346	148.278	322.927	203.101	126.835	299.301	178.353
chr5:166721785:166722834	chr5	166721785	166722834	.	1050	3.52715	6.21548	2.25745e-15	1.08598e-11	14.5806	150.684	43.2875	16.3262	172.59	58.5682	9.80763	151.898	39.5801	13.8863	143.509	41.2262	15.5488	164.371	55.7792	9.3406	144.665	37.6953
chr16:80060704:80061438	chr16	80060704	80061438	.	735	3.61803	4.63909	2.68045e-08	5.09003e-06	2.73387	69.2333	8.65749	3.88719	44.2538	1.06488	8.02442	68.2305	4.68711	3.71955	94.1949	11.7789	5.28869	60.2093	1.44881	10.9176	92.8306	6.37702
chr4:170265888:170267284	chr4	170265888	170267284	.	1397	2.43611	5.29341	9.08157e-08	1.29128e-05	10.9355	51.5856	49.0591	12.439	66.3807	50.0492	7.13282	50.0151	43.2256	7.82783	36.926	35.1175	8.90408	47.5166	35.8262	5.10581	35.8018	30.9417
chr5:157811462:157813018	chr5	157811462	157813018	.	1557	1.50261	6.80491	3.03293e-08	5.59646e-06	71.0806	218.56	82.7271	69.9694	216.844	59.6331	65.9786	156.838	54.683	45.6523	140.372	53.1324	44.9386	139.27	38.3	42.3755	100.731	35.1207
chr12:13744103:13745328	chr12	13744103	13745328	.	1226	5.80775	3.96927	1.02554e-06	9.17643e-05	0	17.6477	15.3911	0.777438	37.6157	8.51901	0	9.26206	38.5385	0	14.3945	12.5539	0.634126	30.6817	6.94862	0	7.5547	31.4343
chr2:13698575:13699146	chr2	13698575	13699146	.	572	6.71586	3.88455	3.1151e-08	5.65498e-06	0	54.3006	0	0.777438	24.3396	2.12975	0	39.5181	0	0	94.9311	0	1.35916	42.5518	3.72334	0	69.0876	0
chr4:21770429:21771552	chr4	21770429	21771552	.	1124	3.39224	4.79163	3.25287e-08	5.83172e-06	5.46774	58.3732	14.4292	3.10975	56.4236	2.12975	9.80763	76.8751	7.81186	4.86454	51.9334	12.8373	2.76668	50.199	1.8948	8.72565	68.3942	6.95005
chr4:23729924:23730490	chr4	23729924	23730490	.	567	5.63744	4.19686	3.37229e-08	5.98468e-06	1.82258	51.5856	8.65749	0.777438	46.4665	0	0	43.8404	0.52079	3.21443	90.9799	15.2689	1.37114	81.9515	0	0	77.32	0.918502
chr2:224968955:224969806	chr2	224968955	224969806	.	852	3.82711	4.39236	6e-07	6.01814e-05	0	32.5804	23.0866	3.88719	37.6157	31.9463	1.7832	19.1416	28.1227	0	38.2399	27.097	4.56243	44.1499	37.4956	2.09296	22.4667	33.0078
chr16:5266627:5266955	chr16	5266627	5266955	.	329	5.63955	4.12993	3.60705e-08	6.27192e-06	0	66.5183	0	0.777438	44.2538	4.2595	1.7832	32.4172	0	0	202.183	0	2.36303	134.51	12.9468	5.42008	98.5326	0
chr8:72169982:72171215	chr8	72169982	72171215	.	1234	2.9232	4.8668	3.70593e-08	6.40527e-06	11.8468	73.3058	6.7336	5.44207	66.3807	8.51901	8.91602	59.8947	10.4158	9.6003	59.405	5.45673	4.4101	53.7931	6.90357	7.2253	48.537	8.44069
chr11:95746861:95748183	chr11	95746861	95748183	.	1323	2.73321	4.36366	8.67858e-05	0.00280263	1.82258	27.1503	32.7061	2.33231	14.3825	14.9083	4.45801	17.9067	54.1622	1.37761	20.5218	24.7211	1.7629	10.8711	11.2685	3.36962	13.5349	40.9389
chr11:78076019:78076768	chr11	78076019	78076768	.	750	6.24028	3.52162	0.00012708	0.00373526	0	2.71503	25.9725	0	6.63807	14.9083	0	9.87953	27.0811	0	3.62004	34.63	0	8.85076	19.8777	0	13.1727	36.1081
chr9:73517304:73518241	chr9	73517304	73518241	.	938	3.26509	4.65159	4.03015e-08	6.8027e-06	6.37903	51.5856	0.961944	6.2195	51.9982	4.2595	6.24122	77.8013	4.68711	6.80067	54.9953	1.02553	6.6306	55.4352	4.54105	6.65375	82.9438	4.99692
chr4:143470439:143471622	chr4	143470439	143471622	.	1184	1.06416	7.58266	2.27113e-06	0.00016723	89.3064	195.482	231.828	122.835	293.182	238.532	112.342	193.886	235.397	75.4277	165.103	195.801	103.746	247.62	201.463	94.8834	163.755	198.815
chr10:122918276:122919633	chr10	122918276	122919633	.	1358	3.06144	4.86814	8.65742e-08	1.25572e-05	5.46774	46.1555	47.1352	6.99694	37.6157	33.0112	2.67481	45.6928	25.5187	4.02632	33.9879	34.7093	5.15239	27.6994	24.3087	1.96967	33.6472	18.7914
chr1:193527110:193528541	chr1	193527110	193528541	.	1432	1.27752	5.86032	8.10261e-05	0.00265163	27.3387	57.0156	68.298	25.6555	66.3807	99.0335	24.0733	63.2908	78.6393	19.0913	39.8154	47.6941	17.9158	46.3553	69.1574	16.8109	44.1975	54.9157
chr20:9221487:9222800	chr20	9221487	9222800	.	1314	1.92367	5.85951	6.79652e-07	6.6116e-05	18.2258	74.6633	46.1733	30.3201	70.8061	84.1252	10.6992	81.5061	91.6591	13.8705	56.8214	35.1395	23.0746	53.8859	64.0222	8.14249	62.029	69.7558
chr10:122268087:122268760	chr10	122268087	122268760	.	674	3.39923	4.81887	4.21322e-08	6.94759e-06	1.82258	57.0156	17.315	8.55182	50.8919	4.2595	6.24122	71.6266	20.8316	2.70412	84.5929	25.6899	12.6882	75.5073	6.31974	9.25997	106.271	30.9074
chr7:22249744:22250826	chr7	22249744	22250826	.	1083	1.53251	6.03471	7.98229e-06	0.000458053	16.4032	66.5183	64.4502	37.317	86.295	117.136	25.8565	79.0363	83.8472	15.1461	61.4204	59.5108	34.4571	79.6814	108.159	23.8749	72.979	77.4213
chr6:102113822:102114717	chr6	102113822	102114717	.	896	3.76222	4.5251	8.16688e-08	1.2151e-05	0.91129	32.5804	24.0486	4.66463	39.8284	37.2707	1.7832	34.2696	19.79	1.01706	36.362	26.8399	5.20606	44.4514	41.5967	1.99018	38.2474	22.0871
chr18:106759:110975	chr18	106759	110975	.	4217	0.897999	10.5152	4.80236e-08	7.71861e-06	1202.9	2134.01	1336.14	792.209	1881.89	1282.11	1142.14	1831.11	1556.12	285.251	506.05	316.846	187.861	446.264	304.034	270.842	434.221	369.012
chr4:21452129:21453104	chr4	21452129	21453104	.	976	8.62553	3.82051	5.03928e-08	8.03611e-06	0	27.1503	5.77166	0	49.7856	1.06488	0	31.491	0	0	27.8179	5.91359	0	51.0098	1.09106	0	32.2654	0
chr4:53688831:53690123	chr4	53688831	53690123	.	1293	1.44236	6.81157	6.21487e-08	9.72603e-06	48.2984	172.404	95.2324	65.3048	173.696	89.4496	82.919	187.402	83.3265	37.3537	133.337	73.6523	50.5064	134.336	69.1799	64.1292	144.936	64.4443
chr9:36102331:36103376	chr9	36102331	36103376	.	1046	1.0606	6.59738	6.91609e-05	0.00234303	32.8064	105.886	124.091	57.5304	91.8267	133.109	61.5206	117.937	132.802	31.3637	101.23	118.634	55.0004	87.7884	127.256	58.8151	112.75	126.961
chr1:192519653:192520604	chr1	192519653	192520604	.	952	3.70462	4.5657	6.32159e-08	9.75757e-06	7.29032	46.1555	20.2008	2.33231	35.4031	11.7136	1.7832	66.0694	6.77027	7.6579	48.4827	21.2193	2.44991	37.1881	12.3042	1.87311	69.4006	7.11163
chr9:43380749:43381410	chr9	43380749	43381410	.	662	1.54804	5.28813	0.000215251	0.00559227	8.20161	36.6529	55.7927	18.6585	27.6586	62.8277	13.374	51.8675	61.4533	12.3891	55.3669	84.279	28.1851	41.7804	94.9059	20.2025	78.3498	92.8297
chr4:21469020:21469842	chr4	21469020	21469842	.	823	8.49521	3.67352	6.5788e-08	1.00471e-05	0	28.5078	0	0	33.1904	0	0	36.7395	1.56237	0	34.6389	0	0	40.3285	0	0	44.641	1.89839
chr3:30749183:30750379	chr3	30749183	30750379	.	1197	1.86381	4.97333	7.19236e-05	0.00241342	8.20161	31.2229	35.5919	9.32925	27.6586	46.8545	9.80763	39.8269	58.8493	6.8518	26.0843	29.7343	7.79386	23.1066	39.1433	8.19351	33.2722	49.164
chr8:60607341:60608532	chr8	60607341	60608532	.	1192	1.93449	4.61463	0.000295447	0.0070536	4.55645	21.7202	34.63	6.2195	23.2333	45.7897	7.13282	24.0814	39.5801	3.82253	18.2217	29.052	5.2177	19.491	38.4141	5.98391	20.2025	33.2048
chr8:105252180:105253487	chr8	105252180	105253487	.	1308	6.17622	4.89039	5.14823e-12	4.95329e-09	0	80.0934	7.69555	0	71.9125	18.1029	2.67481	55.8811	20.3108	0	61.2335	5.88345	0	54.9789	13.8401	2.04496	42.7226	15.5282
chr6:106123640:106124290	chr6	106123640	106124290	.	651	2.2283	5.12489	2.60297e-06	0.000185055	9.1129	33.9379	48.0972	10.1067	65.2744	52.1789	8.91602	35.1958	39.5801	13.9983	52.1319	73.882	15.5249	100.268	80.152	13.6959	54.0643	60.7989
chr5:52006908:52007591	chr5	52006908	52007591	.	684	4.1473	4.55546	6.96185e-08	1.05762e-05	5.46774	25.7928	5.77166	0	67.4871	5.32438	3.56641	63.5995	17.7069	7.99377	37.7088	8.4381	0	98.6653	7.78418	5.21405	92.9817	25.8872
chr2:168365976:168366831	chr2	168365976	168366831	.	856	3.58737	3.97152	8.38036e-05	0.00272707	0	10.8601	35.5919	3.10975	17.7015	21.2975	0	14.5106	24.4771	0	12.6871	41.5793	3.63289	20.6794	24.8803	0	16.9516	28.5948
chr14:102729067:102729745	chr14	102729067	102729745	.	679	2.48478	4.88186	3.58824e-06	0.000240862	4.55645	25.7928	27.8964	4.66463	42.0411	45.7897	10.6992	42.6055	46.3503	6.71053	37.9864	41.0845	6.86985	61.9162	67.4369	15.7573	62.7474	68.2627
chr2:235872249:235874224	chr2	235872249	235874224	.	1976	1.73192	6.00434	4.27729e-07	4.52233e-05	18.2258	93.6686	72.1458	33.4298	85.1886	94.774	24.0733	76.8751	67.7027	9.22358	47.4031	36.511	16.9179	43.1116	47.9625	12.1828	38.9044	34.2625
chr7:41067090:41067454	chr7	41067090	41067454	.	365	4.66926	4.23183	8.25168e-08	1.22142e-05	0	40.7255	14.4292	2.33231	26.5523	27.6868	0.891602	26.5512	18.7485	0	111.577	39.5319	6.3899	72.746	75.8542	2.44275	72.7431	51.3656
chr9:41009203:41009714	chr9	41009203	41009714	.	512	2.29444	4.56613	5.5867e-05	0.00200925	3.64516	32.5804	35.5919	5.44207	25.4459	40.4653	6.24122	20.0678	32.289	7.11945	63.6335	69.5154	10.629	49.6991	79.0338	12.1899	39.1949	63.0645
chr4:108722882:108723589	chr4	108722882	108723589	.	708	3.23316	4.81232	6.59384e-07	6.45168e-05	0.91129	33.9379	45.2113	10.1067	35.4031	41.5302	0.891602	48.7802	22.394	1.28713	47.9349	63.8578	14.275	50.0043	58.6584	1.25933	68.8986	31.6299
chr12:60366805:60367762	chr12	60366805	60367762	.	958	1.64811	5.8732	1.57379e-06	0.000124796	24.6048	62.4457	64.4502	23.3231	95.1457	74.5413	23.1817	66.6868	80.2017	25.6835	65.1834	67.2758	24.3457	99.317	77.8093	24.198	69.6105	83.7179
chr1:76719606:76720635	chr1	76719606	76720635	.	1030	2.15791	5.02941	2.51471e-05	0.00109734	1.82258	39.3679	52.9069	15.5488	38.7221	44.7248	7.13282	35.5046	45.3088	1.7695	38.2213	51.3659	15.0959	37.5943	43.4221	6.92507	34.4705	43.9891
chr17:55937918:55939330	chr17	55937918	55939330	.	1413	2.85361	4.40453	3.57825e-05	0.00143249	0	24.4353	35.5919	4.66463	17.7015	23.4273	4.45801	26.2425	39.0593	0	17.2932	25.1889	3.30122	12.5276	16.5798	3.155	18.5722	27.6428
chr15:71737354:71738135	chr15	71737354	71738135	.	782	1.91525	4.84245	0.000242446	0.00610619	5.46774	13.5752	52.9069	5.44207	27.6586	52.1789	11.5908	40.1356	34.3722	6.992	17.3595	67.6559	6.95916	35.3691	66.725	14.822	51.3243	43.9542
chr4:36395673:36396997	chr4	36395673	36396997	.	1325	1.2774	6.32077	3.86115e-05	0.00151014	20.9597	88.2385	99.0802	53.6432	77.4442	137.369	36.5557	103.735	89.0552	15.8186	66.5951	74.7775	40.4854	58.4484	103.675	27.5892	78.2906	67.2114
chr18:47623812:47624815	chr18	47623812	47624815	.	1004	3.04845	4.44444	2.11319e-06	0.000157204	2.73387	23.0778	32.7061	4.66463	36.5094	26.6219	2.67481	26.86	27.0811	2.72298	22.9858	32.5758	4.64604	36.3639	26.5158	2.66415	26.753	26.9732
chr8:122176270:122176851	chr8	122176270	122176851	.	582	3.32401	4.58851	3.23106e-07	3.61434e-05	3.64516	36.6529	29.8202	2.33231	26.5523	42.595	4.45801	41.6793	16.1445	6.26316	62.9775	51.2375	4.00741	45.6225	73.1873	7.65981	71.6139	27.7397
chr3:32010301:32011132	chr3	32010301	32011132	.	832	1.77338	5.81465	1.39918e-06	0.000114732	20.0484	77.3784	48.0972	26.4329	55.3173	91.5793	16.9404	83.976	72.9106	24.0966	93.0029	57.8091	31.7703	66.4871	110.071	20.3611	100.933	87.633
chr21:36519279:36520988	chr21	36519279	36520988	.	1710	3.79451	4.90199	9.623e-09	2.10423e-06	0	47.513	21.1628	3.88719	60.849	26.6219	7.13282	49.3977	39.0593	0	27.7854	12.3759	2.27321	35.5842	15.5684	4.17124	28.8875	22.8417
chr8:116980708:116982278	chr8	116980708	116982278	.	1571	3.12439	4.71871	1.03441e-07	1.46358e-05	5.46774	73.3058	9.61944	5.44207	57.53	2.12975	9.80763	52.485	10.4158	3.48042	46.6619	6.12313	3.46408	36.62	1.35567	6.24292	33.4087	6.63005
chr6:135174253:135174883	chr6	135174253	135174883	.	631	1.83113	6.16456	2.55899e-07	2.95451e-05	10.9355	84.166	81.7652	40.4268	100.677	91.5793	30.3145	107.44	84.368	17.3304	133.385	129.58	64.0678	159.552	145.134	48.042	170.269	133.705
chr2:238135978:238136799	chr2	238135978	238136799	.	822	3.28011	5.36864	1.59486e-10	7.19282e-08	7.29032	73.3058	37.5158	6.2195	66.3807	47.9194	9.80763	86.4459	23.9564	8.869	89.1798	45.6397	7.56631	80.7552	58.2961	11.9314	105.165	29.144
chr1:231647584:231648522	chr1	231647584	231648522	.	939	2.24186	5.35958	3.20497e-07	3.59954e-05	11.8468	74.6633	50.983	9.32925	51.9982	55.3735	15.1572	47.854	41.6632	12.6164	79.5137	54.295	9.93531	55.3762	58.9708	16.1419	50.9627	44.3698
chr7:120723096:120725341	chr7	120723096	120725341	.	2246	2.08924	5.39514	9.35607e-07	8.546e-05	13.6694	59.7307	34.63	10.8841	53.1046	69.2169	15.1572	56.4986	53.1206	6.08609	26.5942	15.4185	4.84601	23.6441	30.8179	6.74855	25.1552	23.6512
chr1:39662523:39663172	chr1	39662523	39663172	.	650	4.5773	3.76709	1.23026e-05	0.000631855	0	20.3627	12.5053	0.777438	14.3825	27.6868	0.891602	12.9669	20.8316	0	31.3273	19.2389	1.19606	22.1269	42.595	1.3717	19.9491	32.0486
chr7:36698066:36698938	chr7	36698066	36698938	.	873	1.37473	5.6499	0.000143645	0.00408491	12.7581	52.9431	80.8033	27.2103	43.1475	74.5413	22.2901	64.5257	59.8909	14.614	60.645	92.5581	31.1688	49.4244	85.3852	25.5327	73.9126	68.6035
chr8:106530207:106531118	chr8	106530207	106531118	.	912	3.15449	4.68905	1.1203e-07	1.55463e-05	6.37903	55.6581	12.5053	10.1067	48.6792	12.7785	1.7832	62.3646	8.33265	6.99455	61.0286	13.7119	11.0819	53.3763	14.0115	1.95527	68.3822	9.13667
chr12:31635451:31636535	chr12	31635451	31636535	.	1085	1.49409	5.48216	6.44143e-05	0.00222145	16.4032	39.3679	67.336	16.3262	50.8919	61.7628	20.5069	57.7335	57.8077	15.1182	36.2838	62.0609	15.0472	46.905	56.9242	18.9003	53.2106	53.279
chr17:27950853:27951710	chr17	27950853	27951710	.	858	2.16535	5.67825	1.19564e-07	1.63666e-05	14.5806	100.456	18.2769	31.0975	120.592	3.19463	29.4229	117.628	12.499	16.9938	117.082	21.3018	36.2442	140.55	3.72334	34.2924	137.096	14.5676
chr8:113628380:113629279	chr8	113628380	113629279	.	900	4.04108	4.21859	1.19642e-07	1.63666e-05	3.64516	54.3006	1.92389	2.33231	58.6363	1.06488	2.67481	34.2696	0	4.05018	60.334	2.13765	2.59146	65.1515	1.1832	2.97201	38.0774	0
chr9:22052090:22053128	chr9	22052090	22053128	.	1039	2.2118	5.0513	4.49862e-05	0.00169515	1.82258	40.7255	40.4016	3.88719	26.5523	60.6979	18.7237	44.4579	47.3919	1.75417	39.1968	38.8851	3.74128	25.5556	58.4196	18.0208	42.7891	45.613
chr3:193664203:193665683	chr3	193664203	193665683	.	1481	1.28385	5.96721	7.67646e-05	0.00254098	19.1371	70.5908	81.7652	24.878	66.3807	91.5793	41.9053	71.9353	81.7641	12.9217	47.6643	55.2095	16.7981	44.8216	61.8361	28.2953	48.5721	55.2087
chr3:187121351:187121997	chr3	187121351	187121997	.	647	1.24001	6.83655	1.05616e-06	9.40892e-05	53.7661	131.679	118.319	57.5304	160.42	146.953	69.545	135.844	141.655	83.1006	203.522	182.873	88.9187	247.945	227.13	107.488	209.959	218.941
chr6:73783793:73784421	chr6	73783793	73784421	.	629	8.50436	3.63649	1.46228e-07	1.90123e-05	0	51.5856	0	0	24.3396	0	0	24.6988	2.08316	0	82.0121	0	0	38.6957	0	0	39.2668	3.31186
chr9:118434746:118435790	chr9	118434746	118435790	.	1045	2.50076	5.97722	1.56747e-09	4.81315e-07	31.8952	124.891	66.3741	10.1067	108.422	54.3087	13.374	81.5061	65.6196	30.5217	119.513	63.5159	9.67148	103.753	51.97	12.7981	77.9963	62.7939
chr10:42599378:42600439	chr10	42599378	42600439	.	1062	0.732408	10.3459	0.000347795	0.00798628	1224.77	1851.65	1611.26	485.121	1158.34	1380.08	797.984	1161.15	2030.56	1153.27	1743.55	1517.19	456.8	1090.72	1299.51	751.398	1093.37	1912.02
chr14:72943309:72944752	chr14	72943309	72944752	.	1444	1.76095	5.70699	3.53276e-06	0.000238805	25.5161	96.3836	57.7166	15.5488	53.1046	77.7359	17.832	53.72	61.9741	17.6704	66.7476	39.97	10.7678	36.776	53.8338	12.3491	37.2022	42.9183
chr4:107450565:107451383	chr4	107450565	107451383	.	819	3.47556	4.52843	1.63309e-07	2.04946e-05	8.20161	32.5804	12.5053	2.33231	61.9554	15.9731	2.67481	51.8675	6.24948	10.0142	39.7807	15.2689	2.84776	75.6476	19.5032	3.26594	63.3303	7.63063
chr12:70359988:70361126	chr12	70359988	70361126	.	1139	1.92255	5.85906	1.92965e-07	2.3501e-05	18.2258	76.0209	50.983	23.3231	102.89	58.5682	35.6641	111.453	31.7682	16.0016	66.7435	44.7612	20.4769	90.3337	51.4207	31.3118	97.852	27.8913
chr14:25142396:25143316	chr14	25142396	25143316	.	921	6.55764	3.77757	2.03067e-07	2.43209e-05	0	31.2229	3.84777	0.777438	37.6157	0	0	36.4308	0	0	33.901	4.17782	0.844124	40.8423	0	0	39.5557	0
chr5:62427248:62428271	chr5	62427248	62428271	.	1024	2.86437	4.72747	2.02637e-07	2.43209e-05	7.29032	44.798	11.5433	11.6616	66.3807	7.45413	4.45801	62.0558	8.85344	7.11945	43.7481	11.2728	11.3883	64.8249	7.27943	4.35353	60.6014	8.64593
chr2:139880139:139880882	chr2	139880139	139880882	.	744	2.18022	5.45372	2.04445e-07	2.43848e-05	9.1129	67.8758	34.63	16.3262	85.1886	37.2707	24.9649	76.2576	30.2058	12.2485	91.2309	46.5457	21.9438	114.501	50.095	33.5549	102.497	40.5992
chr5:83220509:83221622	chr5	83220509	83221622	.	1114	2.87768	5.17978	4.39903e-07	4.61722e-05	6.37903	62.4457	65.4122	0.777438	46.4665	30.8814	15.1572	53.4112	33.3306	5.72624	56.0554	58.7183	0.69788	41.7114	27.7212	13.6061	47.9454	29.9197
chr12:67040945:67041496	chr12	67040945	67041496	.	552	2.66032	4.89021	2.34204e-07	2.74587e-05	12.7581	63.8032	12.5053	10.8841	56.4236	9.58388	5.34961	64.5257	17.7069	23.1124	115.586	22.6545	19.7176	102.217	17.3621	9.69133	116.894	32.0777
chr16:76838803:76839789	chr16	76838803	76839789	.	987	3.54412	4.3726	2.37977e-07	2.76975e-05	4.55645	38.0104	12.5053	2.33231	69.6998	9.58388	4.45801	27.7862	8.33265	4.61646	38.5111	12.67	2.36303	70.6178	9.71011	4.51673	28.1522	8.4424
chr6:122115551:122116524	chr6	122115551	122116524	.	974	1.92326	5.76861	2.54444e-07	2.94951e-05	32.8064	77.3784	18.2769	25.6555	120.592	36.2058	21.3985	104.044	40.6216	33.6822	79.4439	18.7648	26.3403	123.811	37.1723	21.9697	106.821	41.706
chr1:172839645:172841137	chr1	172839645	172841137	.	1493	1.14622	7.13605	1.23332e-06	0.000105321	67.4355	161.544	175.074	73.0792	167.058	154.407	96.2931	192.651	164.57	45.1678	108.201	117.263	48.9479	111.894	103.421	64.4964	129.036	110.228
chr6:128920665:128922400	chr6	128920665	128922400	.	1736	3.53557	4.32864	3.66536e-06	0.000244335	0	31.2229	13.4672	2.33231	22.1269	24.4921	4.45801	28.7124	39.0593	0	17.9855	7.75761	1.3435	12.7459	14.1084	2.56798	16.5394	22.4996
chr21:27762075:27762856	chr21	27762075	27762856	.	782	2.25335	5.18773	3.1132e-05	0.00129855	15.4919	59.7307	48.0972	11.6616	37.6157	59.6331	0	36.122	48.4335	19.8107	76.3819	61.5053	14.9125	48.102	76.2571	0	46.1919	61.9354
chr13:51251657:51253023	chr13	51251657	51253023	.	1367	3.08701	5.71556	6.21368e-11	3.5167e-08	10.0242	97.7411	62.5263	10.1067	117.273	45.7897	14.2656	80.8887	24.4771	7.33299	71.5004	45.7398	7.39334	85.7883	33.4965	10.4357	59.1724	17.9057
chr2:196275754:196276503	chr2	196275754	196276503	.	750	3.88458	4.36475	3.32917e-07	3.68173e-05	5.46774	43.4405	5.77166	1.55488	37.6157	3.19463	1.7832	49.7064	21.3524	7.29032	57.9207	7.69555	2.07317	50.1543	4.2595	2.37761	66.2752	28.4699
chr1:4440444:4441054	chr1	4440444	4441054	.	611	4.12493	4.27847	3.51293e-07	3.87013e-05	5.46774	32.5804	10.5814	1.55488	33.1904	13.8434	0	57.116	4.16632	8.94884	53.323	17.3181	2.5448	54.3214	22.6569	0	93.4796	6.81886
chr8:32578239:32579680	chr8	32578239	32579680	.	1442	1.86682	4.99469	7.19912e-05	0.00241342	8.20161	36.6529	51.9449	11.6616	24.3396	30.8814	9.80763	46.3103	51.5582	5.68766	25.4181	36.0228	8.08708	16.8791	21.4157	6.80141	32.1153	35.7547
chr3:124858972:124859508	chr3	124858972	124859508	.	537	6.52512	3.67049	3.7447e-07	4.0482e-05	0	47.513	0	0.777438	37.6157	2.12975	0	19.4503	0	0	88.4787	0	1.44774	70.048	3.96602	0	36.2204	0
chr16:28814720:28815142	chr16	28814720	28815142	.	423	1.90433	4.96637	0.000118726	0.00352297	7.29032	43.4405	46.1733	16.3262	26.5523	44.7248	3.56641	34.8871	45.3088	17.2348	102.696	109.157	38.5962	62.7714	105.732	8.43123	82.4754	107.113
chr9:4235703:4236716	chr9	4235703	4236716	.	1014	1.77839	5.5248	3.30654e-05	0.00135761	13.6694	73.3058	94.2705	24.1006	30.9777	43.6599	9.80763	61.1296	50.5167	13.4806	72.2937	92.9689	23.7678	30.55	43.0571	9.67222	60.2856	49.8192
chr12:19952138:19953307	chr12	19952138	19953307	.	1170	5.12258	4.6265	9.87728e-11	4.91548e-08	2.73387	48.8706	18.2769	0.777438	44.2538	17.038	0.891602	64.5257	10.4158	2.33664	41.7697	15.6213	0.664477	37.8238	14.5624	0.762053	55.1502	8.9024
chr8:49320098:49321830	chr8	49320098	49321830	.	1733	1.42167	6.27768	2.3258e-06	0.000169525	24.6048	108.601	86.5749	44.314	89.614	101.163	41.0137	98.4866	91.1383	14.1978	62.6666	49.9567	25.5707	51.7103	58.3746	23.6663	56.8301	52.5899
chr16:49082254:49083044	chr16	49082254	49083044	.	791	2.14615	4.57153	0.000189106	0.00505402	7.29032	32.5804	42.3255	7.77438	24.3396	37.2707	1.7832	20.6853	28.6435	9.21659	41.1888	53.5089	9.82855	30.7707	47.1184	2.25437	26.1508	36.2117
chr13:72865190:72865766	chr13	72865190	72865766	.	577	1.55119	6.12232	5.1388e-07	5.29737e-05	44.6532	104.529	51.9449	31.0975	102.89	52.1789	39.2305	126.582	59.8909	77.3886	181.159	90.0259	53.8952	178.319	90.4314	67.9905	219.379	103.797
chr21:36523068:36523563	chr21	36523068	36523563	.	496	2.6149	4.41608	5.95942e-05	0.00210284	3.64516	28.5078	43.2875	6.99694	22.1269	18.1029	0.891602	23.4639	31.7682	7.34911	57.4754	87.2731	14.1067	44.6107	36.4978	1.79759	47.3062	64.0488
chr8:128092244:128093707	chr8	128092244	128093707	.	1464	1.62616	6.14228	5.866e-07	5.94092e-05	48.2984	107.244	47.1352	23.3231	109.528	74.5413	38.3389	119.789	54.683	32.9907	73.2539	32.1962	15.9311	74.8144	50.9162	26.1878	81.8233	37.3518
chr13:48073436:48074365	chr13	48073436	48074365	.	930	3.93097	4.13351	5.94273e-07	5.99759e-05	0.91129	48.8706	8.65749	3.10975	24.3396	17.038	2.67481	34.8871	6.24948	0.979882	52.549	9.30913	3.34382	26.1716	18.3204	2.87614	37.513	6.71988
chr8:105211338:105212942	chr8	105211338	105212942	.	1605	2.57867	6.05109	5.74874e-11	3.31863e-08	23.6935	139.824	53.8688	23.3231	120.592	58.5682	11.5908	96.0167	58.8493	14.7623	87.1178	33.5631	14.5315	75.135	36.4911	7.2217	59.8235	36.6662
chr10:42393922:42394932	chr10	42393922	42394932	.	1011	0.821181	9.65762	0.000207399	0.00542707	751.814	1236.7	1050.44	284.542	705.848	835.928	474.333	731.703	1185.84	743.634	1223.24	1039.01	281.446	698.169	826.832	469.172	723.742	1172.94
chr2:227199982:227201250	chr2	227199982	227201250	.	1269	3.02785	3.9647	0.000288162	0.00691815	0	9.50261	24.0486	1.55488	8.85076	28.7516	3.56641	23.1552	24.9979	0	7.48826	18.9508	1.22528	6.9746	22.6569	2.81041	18.2468	19.6989
chr8:106728963:106729639	chr8	106728963	106729639	.	677	3.37718	4.57376	6.13956e-07	6.11076e-05	9.1129	52.9431	9.61944	5.44207	68.5934	9.58388	0	34.2696	15.1029	13.4607	78.2025	14.2089	8.0385	101.32	14.1564	0	50.6198	22.3086
chr3:153869942:153870911	chr3	153869942	153870911	.	970	3.06101	4.53863	6.19885e-07	6.12752e-05	7.29032	27.1503	8.65749	3.10975	73.0188	12.7785	7.13282	46.0016	10.9366	7.51579	27.99	8.92525	3.20593	75.2771	13.1737	7.35342	47.4243	11.2748
chr12:63095984:63097409	chr12	63095984	63097409	.	1426	2.05505	5.35591	1.44522e-06	0.000117972	9.1129	57.0156	44.2494	11.6616	46.4665	47.9194	19.6153	63.5995	54.683	6.39053	39.9829	31.0304	8.17782	32.5852	33.6041	13.7554	44.5999	38.3471
chr10:112086339:112086922	chr10	112086339	112086922	.	584	2.15581	5.13303	1.69672e-05	0.000821754	4.55645	32.5804	32.7061	15.5488	34.2967	76.6711	8.91602	61.4383	34.3722	7.80214	55.7883	56.0036	26.6246	58.7272	131.286	15.2672	105.203	58.8564
chr3:146264395:146264960	chr3	146264395	146264960	.	566	3.5506	4.26489	7.33597e-07	7.03473e-05	0.91129	35.2954	4.80972	4.66463	38.7221	7.45413	4.45801	47.2365	14.0613	1.61005	62.3594	8.49773	8.24139	68.4136	13.1698	7.87635	83.4567	24.8434
chr11:10709940:10710748	chr11	10709940	10710748	.	809	1.34836	6.42045	7.82309e-07	7.40344e-05	62.879	134.394	49.0591	57.5304	130.549	50.0492	51.7129	170.113	50.5167	77.7244	166.124	60.6417	71.113	161.371	61.8655	63.9221	210.276	62.4433
chr21:36358909:36359577	chr21	36358909	36359577	.	669	2.1247	4.83983	5.53932e-05	0.00199859	4.55645	25.7928	39.4397	8.55182	56.4236	36.2058	9.80763	21.3027	43.7464	6.81084	38.5542	58.9532	12.783	84.3402	54.1193	14.6601	31.8427	65.3907
chr18:20871257:20872149	chr18	20871257	20872149	.	893	2.66583	4.48536	3.45483e-05	0.00140254	0.91129	20.3627	22.1247	8.55182	28.765	44.7248	2.67481	30.8735	28.6435	1.02048	22.8026	24.7757	9.5765	32.2116	50.0837	2.99531	34.5728	32.0756
chr5:152068196:152068687	chr5	152068196	152068687	.	492	2.54287	4.81497	8.41295e-07	7.78306e-05	8.20161	51.5856	10.5814	7.77438	57.53	23.4273	11.5908	52.485	17.7069	16.6699	104.849	21.5069	15.8016	116.931	47.6164	23.5586	106.677	35.9896
chr18:19766164:19766985	chr18	19766164	19766985	.	822	3.88835	4.45195	8.81595e-07	8.10393e-05	6.37903	50.2281	0	4.66463	85.1886	7.45413	0	34.5784	0.52079	7.76038	61.1047	0	5.67473	103.636	9.06829	0	42.0661	0.633565
chr10:128948140:128948921	chr10	128948140	128948921	.	782	1.57909	5.91219	9.0937e-07	8.33272e-05	30.9839	89.596	32.7061	36.5396	111.741	36.2058	39.2305	116.393	34.893	39.6213	114.573	41.8236	46.7258	142.891	46.299	50.1669	148.84	44.6201
chr16:27729818:27730372	chr16	27729818	27730372	.	555	4.82161	3.78417	7.85012e-06	0.000452267	0	10.8601	8.65749	1.55488	25.4459	21.2975	0	18.5241	22.9148	0	19.5678	15.5991	2.80158	45.8486	38.3739	0	33.3768	41.2879
chr14:69246207:69247211	chr14	69246207	69247211	.	1005	0.994485	6.48433	0.000202762	0.00533502	59.2339	114.031	96.1944	41.2042	82.9759	106.488	49.0381	100.648	142.176	58.9392	113.464	95.7158	40.9992	82.5631	105.958	48.7942	100.147	141.468
chr9:18235092:18236195	chr9	18235092	18236195	.	1104	4.03561	4.19687	9.3957e-07	8.55512e-05	5.46774	39.3679	1.92389	2.33231	58.6363	2.12975	0	33.9609	9.89502	4.95266	35.6594	1.74265	2.1126	53.1126	1.92912	0	30.7617	8.96288
chr9:72500121:72501215	chr9	72500121	72501215	.	1095	3.11011	4.35494	2.19405e-05	0.000995738	7.29032	17.6477	25.9725	1.55488	34.2967	33.0112	0	24.6988	26.5603	6.65783	16.1166	23.7192	1.41998	31.3212	30.1472	0	22.556	24.256
chr7:113370259:113371470	chr7	113370259	113371470	.	1212	1.59125	6.10462	1.01039e-06	9.11372e-05	38.2742	99.0986	48.0972	31.0975	79.6569	54.3087	45.4717	159.925	47.3919	31.5794	81.7645	39.6841	25.658	65.7235	44.8091	37.5179	131.951	39.1022
chr18:26734278:26735742	chr18	26734278	26735742	.	1465	1.22742	7.34639	2.10619e-07	2.50178e-05	78.3709	194.125	180.845	97.9572	257.779	155.472	95.4015	187.711	204.15	53.4955	132.508	123.444	66.865	175.958	106.124	65.1205	128.13	139.351
chr10:52298469:52299455	chr10	52298469	52299455	.	987	2.61271	4.62542	5.50126e-06	0.000336416	2.73387	31.2229	31.7441	7.77438	43.1475	30.8814	5.34961	26.5512	30.7266	2.76988	31.6341	32.1622	7.87678	43.7158	31.2881	5.42008	26.901	31.1313
chrY:13468976:13469677	chrY	13468976	13469677	.	702	1.19623	6.99054	1.11914e-06	9.81849e-05	91.129	187.337	105.814	59.8627	175.909	106.488	89.1602	185.55	130.198	129.813	266.862	150.732	85.2745	250.583	151.692	127.009	264.316	185.467
chr5:150997430:150998621	chr5	150997430	150998621	.	1192	1.34954	5.72994	0.000132868	0.00386212	20.9597	77.3784	56.7547	17.8811	48.6792	67.0872	32.0977	56.1898	87.4928	17.5836	64.9147	47.613	15.0009	40.8383	56.2812	26.9276	47.1391	73.4
chr9:116457536:116459480	chr9	116457536	116459480	.	1945	1.65766	6.47441	2.32749e-08	4.57011e-06	41.9193	103.171	110.624	43.5365	140.506	94.774	35.6641	137.079	79.6809	21.5524	53.0443	56.8758	22.3838	72.2395	48.727	18.3363	70.4774	40.9671
chr20:22756164:22757646	chr20	22756164	22757646	.	1483	2.16351	5.4539	1.22488e-06	0.000105223	36.4516	97.7411	23.0866	13.2164	80.7632	7.45413	10.6992	90.7682	21.8732	24.5796	65.9077	15.5675	8.91197	54.4594	5.02639	7.21459	61.2058	14.7493
chr5:17679742:17681307	chr5	17679742	17681307	.	1566	5.94493	4.9601	2.56123e-12	2.64027e-09	0	70.5908	12.5053	2.33231	65.2744	4.2595	0.891602	88.6071	20.3108	0	45.0771	7.98548	1.48934	41.6822	2.71999	0.56935	56.5818	12.9699
chr3:62904249:62905062	chr3	62904249	62905062	.	814	4.63973	4.83394	5.58894e-10	1.9436e-07	1.82258	73.3058	25.0105	0	68.5934	13.8434	5.34961	40.1356	19.79	2.23904	90.0563	30.7255	0	84.2671	17.0066	6.57201	49.3066	24.3121
chr12:52889478:52891110	chr12	52889478	52891110	.	1633	1.48926	5.66349	4.15859e-05	0.00160258	15.4919	62.4457	59.6405	20.2134	57.53	88.3847	28.5313	60.8209	51.0375	9.48679	38.2399	36.522	12.3781	35.2296	54.1241	17.4717	37.2449	31.2538
chr4:86419116:86420026	chr4	86419116	86420026	.	911	2.17124	5.20031	2.14493e-06	0.000158747	18.2258	51.5856	41.3636	9.32925	45.3602	44.7248	6.24122	54.6462	45.8296	20.0064	56.6252	45.4046	10.2407	49.7916	49.0942	6.85095	59.9848	50.3069
chr5:173837422:173838800	chr5	173837422	173838800	.	1379	4.15753	5.12845	4.029e-10	1.49094e-07	3.64516	74.6633	32.7061	7.77438	57.53	12.7785	0	82.1236	29.1643	2.64334	54.1431	23.7172	5.63769	41.7186	9.26651	0	59.553	21.1488
chr1:203146601:203147463	chr1	203146601	203147463	.	863	2.44671	5.00385	1.3354e-06	0.000110761	8.20161	70.5908	22.1247	15.5488	69.6998	12.7785	8.02442	39.2094	32.289	9.5036	81.797	25.637	18.0171	80.7645	14.8071	9.29829	45.4338	37.4148
chr2:8353745:8354780	chr2	8353745	8354780	.	1036	3.78304	4.45257	1.36586e-06	0.000112963	0	46.1555	2.88583	5.44207	50.8919	0	5.34961	57.116	14.0613	0	44.5517	2.78555	5.25296	49.1235	0	5.16372	55.1313	13.5727
chr2:17861169:17862148	chr2	17861169	17862148	.	980	1.54986	5.10729	0.00038507	0.00866978	15.4919	50.2281	48.0972	10.8841	35.4031	38.3355	11.5908	28.4037	59.3701	15.8081	51.2531	49.0788	11.1063	36.1256	39.1179	11.8274	28.9833	60.5817
chr15:62898422:62899075	chr15	62898422	62899075	.	654	1.26106	5.78741	0.000133598	0.00386778	33.7177	59.7307	71.1838	20.9908	53.1046	72.4116	24.0733	73.1703	74.473	51.5562	91.3313	108.844	32.0961	81.1997	110.721	36.8093	111.881	113.873
chr12:12094647:12095136	chr12	12094647	12095136	.	490	4.5539	3.91044	1.45453e-06	0.000118263	0	40.7255	1.92389	3.10975	45.3602	10.6488	0.891602	20.3765	4.16632	0	83.1132	3.9263	6.34643	92.5718	21.7322	1.8196	41.5848	8.5027
chr8:128243252:128244158	chr8	128243252	128244158	.	907	1.87748	5.47632	1.64248e-06	0.000128489	22.7823	59.7307	32.7061	17.1036	107.316	23.4273	25.8565	74.4052	24.9979	25.1182	65.8552	36.0596	18.8574	118.319	25.8294	28.5077	82.0344	27.5611
chr4:122250839:122251688	chr4	122250839	122251688	.	850	4.68467	3.73001	2.52193e-05	0.00109793	0	24.4353	6.7336	1.55488	16.5952	17.038	0	10.497	29.6851	0	28.7474	7.92189	1.82927	19.5237	20.0447	0	12.3494	34.9236
chr12:127256781:127257540	chr12	127256781	127257540	.	760	0.798264	7.16017	0.000275866	0.00666884	95.6855	152.042	191.427	93.2925	155.995	202.326	81.1358	161.16	141.655	125.902	200.055	251.877	122.753	205.256	266.219	106.758	212.052	186.388
chr16:79692116:79692456	chr16	79692116	79692456	.	341	6.39865	3.75981	1.73886e-06	0.000134559	0	29.8653	0	0.777438	35.4031	0	0	29.3299	12.499	0	87.5816	0	2.27988	103.821	0	0	86.0113	36.6539
chr1:151996590:151997674	chr1	151996590	151997674	.	1085	3.34213	3.93498	5.18287e-05	0.00189605	2.73387	23.0778	31.7441	1.55488	18.8079	12.7785	0.891602	13.8931	20.3108	2.5197	21.2698	29.2573	1.43307	17.3344	11.7774	0.821753	12.8047	18.7197
chr17:68401448:68402288	chr17	68401448	68402288	.	841	1.53471	6.13803	1.77098e-06	0.000136314	66.5242	114.031	38.4777	38.0945	127.23	37.2707	25.8565	134.609	38.5385	79.1013	135.59	45.7524	45.2966	151.284	44.3171	30.7449	160.058	45.8246
chr4:139268999:139269969	chr4	139268999	139269969	.	971	2.20248	5.03837	6.36729e-06	0.000379722	10.9355	44.798	48.0972	5.44207	44.2538	23.4273	12.4824	43.5317	48.9543	11.2621	46.1359	49.5337	5.6046	45.5755	24.127	12.8552	44.8318	50.4164
chr10:123899831:123901467	chr10	123899831	123901467	.	1637	1.25238	6.2065	2.63648e-05	0.00114092	30.0726	81.4509	80.8033	45.8688	105.103	80.9306	35.6641	81.8149	109.366	18.3705	49.7562	49.3606	28.0201	64.2045	49.4383	21.7863	49.9785	66.8088
chr3:8551629:8552280	chr3	8551629	8552280	.	652	2.28918	4.98691	1.84594e-06	0.000140956	18.2258	69.2333	5.77166	7.77438	54.2109	11.7136	15.1572	75.9489	13.5405	27.9537	106.186	8.85224	11.9239	83.1456	17.9657	23.2473	116.486	20.7677
chr3:49298015:49299498	chr3	49298015	49299498	.	1484	1.40703	5.84738	3.49007e-05	0.00141031	33.7177	69.2333	66.3741	29.5426	78.5505	73.4764	15.1572	62.3646	77.077	22.7208	46.6532	44.7265	19.9074	52.9316	49.5124	10.2138	42.0246	51.9387
chr1:20537174:20538440	chr1	20537174	20538440	.	1267	2.66378	4.67114	1.94464e-06	0.000146937	8.20161	51.5856	2.88583	6.2195	32.084	8.51901	12.4824	83.976	5.72869	6.47325	40.7147	2.27769	4.90884	25.3228	6.72376	9.85196	66.2794	4.52146
chr7:105417341:105418471	chr7	105417341	105418471	.	1131	1.43683	6.00006	1.39258e-05	0.000696627	40.0968	65.1607	77.9174	29.5426	76.3378	91.5793	18.7237	94.473	68.2235	35.4525	57.6134	68.8925	26.1208	67.4959	80.972	16.555	83.5305	60.3214
chr8:101524097:101524974	chr8	101524097	101524974	.	878	1.67421	5.15645	0.000219219	0.00566477	7.29032	61.0882	55.7927	12.439	25.4459	37.2707	17.832	36.122	55.2038	8.30333	69.5765	63.5452	14.1674	28.9817	42.4495	20.3099	41.1413	62.8745
chr19:34723674:34724588	chr19	34723674	34724588	.	915	1.23117	5.75673	0.000393872	0.0088198	33.7177	54.3006	63.4883	28.7652	48.6792	77.7359	13.374	72.5528	79.1601	36.85	59.3449	69.3861	31.4374	53.2013	84.9573	14.6164	79.2927	86.5138
chr1:211110849:211112108	chr1	211110849	211112108	.	1260	3.48739	4.17771	2.26842e-06	0.00016723	8.20161	35.2954	5.77166	1.55488	38.7221	7.45413	0.891602	45.0754	5.72869	6.50921	28.0122	4.58068	1.23403	30.7318	5.91598	0.707621	35.7741	4.54658
chr17:60901861:60902767	chr17	60901861	60902767	.	907	1.94234	5.90001	1.14617e-07	1.58292e-05	19.1371	71.9483	63.4883	32.6524	101.784	76.6711	16.0488	89.2245	53.6414	21.0993	79.3256	69.9981	36.0004	112.22	84.5326	17.6944	98.3732	59.1416
chr18:9025129:9025987	chr18	9025129	9025987	.	859	1.12715	6.17138	0.000220285	0.00567706	29.1613	54.3006	119.281	42.7591	102.89	77.7359	39.2305	84.5935	84.8888	33.9479	63.2138	138.86	49.7777	119.779	90.4959	45.67	98.479	98.8228
chrY:13473334:13476587	chrY	13473334	13476587	.	3254	0.979139	7.89504	2.33239e-06	0.000169577	189.548	357.027	182.769	144.603	354.031	181.029	176.537	298.238	246.334	58.2509	109.719	56.1676	44.4387	108.799	55.6327	54.2524	91.6529	75.7019
chr10:117839722:117840605	chr10	117839722	117840605	.	884	2.42508	4.86642	2.46117e-06	0.000176276	3.64516	76.0209	7.69555	17.1036	48.6792	11.7136	13.374	62.3646	9.89502	4.12348	85.9964	8.70537	19.348	55.067	13.2507	15.129	70.5481	11.1935
chr3:30333696:30334446	chr3	30333696	30334446	.	751	4.0669	3.95487	2.47967e-06	0.000176724	0	36.6529	3.84777	3.88719	45.3602	9.58388	1.7832	22.2289	6.77027	0	48.8055	5.12353	5.17602	60.3997	12.7615	2.37444	29.5991	9.01501
chrX:140314706:140315229	chrX	140314706	140315229	.	524	6.2372	3.5881	2.47539e-06	0.000176724	0	14.9327	4.80972	0.777438	33.1904	3.19463	0	35.1958	0	0	28.4975	9.17885	1.48366	63.3404	6.09662	0	67.1676	0
chr20:52517041:52517951	chr20	52517041	52517951	.	911	2.54984	4.41434	7.2925e-05	0.00243624	7.29032	31.2229	37.5158	4.66463	16.5952	31.9463	0.891602	28.4037	20.8316	8.00255	34.2732	41.1809	5.12034	18.2164	35.0673	0.978707	31.1785	22.8668
chr7:16308601:16309165	chr7	16308601	16309165	.	565	2.45639	4.99522	1.30216e-05	0.000662886	2.73387	23.0778	28.8583	7.77438	49.7856	75.6062	12.4824	52.1763	21.3524	4.83871	40.8456	51.0766	13.76	88.116	133.816	22.0928	92.3474	37.7919
chr10:133467738:133468774	chr10	133467738	133468774	.	1037	2.1866	5.12143	2.75804e-06	0.000193223	10.0242	35.2954	28.8583	12.439	79.6569	19.1678	16.0488	60.2034	36.9761	9.66653	34.0361	27.8286	11.9952	76.8147	18.4839	15.4762	58.0554	35.6568
chr4:23374875:23375378	chr4	23374875	23375378	.	504	4.44161	3.83736	2.84545e-06	0.000198384	1.82258	17.6477	0.961944	2.33231	45.3602	6.38926	0	34.2696	5.2079	3.61623	35.0153	1.90862	4.62761	90.0003	12.6771	0	67.9953	10.3331
chr13:21607744:21609152	chr13	21607744	21609152	.	1409	2.56937	4.30778	5.83792e-05	0.00207264	1.82258	21.7202	33.668	4.66463	26.5523	26.6219	5.34961	23.7726	21.3524	1.29353	15.4154	23.895	3.31059	18.8448	18.8942	3.79675	16.872	15.1543
chr4:111799411:111800391	chr4	111799411	111800391	.	981	2.98653	4.40469	3.09064e-06	0.000213417	1.82258	43.4405	5.77166	8.55182	47.5729	10.6488	5.34961	38.2832	16.6653	1.85788	44.2818	5.88345	8.71745	48.4943	10.855	5.45323	39.0247	16.9881
chr8:116068329:116068682	chr8	116068329	116068682	.	354	3.10533	4.31532	3.0853e-06	0.000213417	8.20161	48.8706	3.84777	6.99694	47.5729	4.2595	0.891602	45.0754	1.56237	23.1684	138.052	10.8694	19.7654	134.387	12.0325	2.51865	127.332	4.41348
chr8:123770476:123771627	chr8	123770476	123771627	.	1152	1.14236	6.32808	0.000318705	0.00747894	50.121	65.1607	75.9935	20.2134	110.635	140.564	52.6045	92.0032	102.596	43.5078	56.5631	65.9666	17.5463	96.0369	122.017	45.6637	79.8638	89.0588
chr9:72726172:72727118	chr9	72726172	72727118	.	947	4.30578	3.8434	2.68346e-05	0.00115778	0	13.5752	16.353	2.33231	8.85076	33.0112	0	30.2561	9.37423	0	14.3349	17.2683	2.46284	9.34611	34.8587	0	31.9494	9.89887
chr8:105967529:105968629	chr8	105967529	105968629	.	1101	5.1142	3.69987	3.50401e-06	0.000237976	0	35.2954	4.80972	2.33231	30.9777	0	0	30.2561	1.04158	0	32.0576	4.3685	2.11836	28.1359	0	0	27.4805	0.946032
chr5:73233613:73235215	chr5	73233613	73235215	.	1603	1.95754	5.80078	6.0562e-07	6.04865e-05	32.8064	80.0934	50.983	20.9908	87.4013	67.0872	8.02442	74.0965	67.7027	20.4657	49.9647	31.8047	13.0947	54.5236	41.851	5.00588	46.2236	42.235
chr1:164606678:164608123	chr1	164606678	164608123	.	1446	1.43954	6.1047	3.66029e-06	0.000244335	35.5403	112.674	30.7822	35.7621	111.741	45.7897	58.8458	126.89	47.9127	24.5784	77.921	21.2878	24.7318	77.2759	31.6664	40.6955	87.7526	33.1347
chr12:15066383:15066793	chr12	15066383	15066793	.	411	5.84056	4.1648	1.79593e-08	3.75637e-06	0	50.2281	14.4292	1.55488	33.1904	3.19463	0	30.2561	17.1861	0	122.209	35.1074	3.78315	80.7552	7.77282	0	73.6157	41.8153
chr2:15814301:15815092	chr2	15814301	15815092	.	792	3.60221	4.36852	4.02934e-06	0.000264492	0.91129	54.3006	8.65749	9.32925	40.9348	2.12975	0	39.5181	17.7069	1.15062	68.5614	10.9312	11.7794	51.6853	2.68908	0	49.8966	22.3572
chr5:5619393:5620611	chr5	5619393	5620611	.	1219	2.2077	4.73369	1.6497e-05	0.000805703	18.2258	78.7359	2.88583	13.2164	37.6157	1.06488	8.02442	66.6868	0.52079	14.9514	64.5906	2.36738	10.842	30.8579	0.873565	6.58279	54.7062	0.427228
chr7:17821243:17822284	chr7	17821243	17822284	.	1042	2.58315	4.94834	4.03188e-06	0.000264492	16.4032	44.798	20.2008	3.88719	63.0617	41.5302	8.02442	59.5859	8.33265	15.7421	42.9923	19.3866	3.73051	60.5199	39.8562	7.70098	57.1842	7.99678
chr1:115710546:115712257	chr1	115710546	115712257	.	1712	1.28622	6.33042	4.33217e-06	0.000279148	52.8548	130.321	63.4883	59.8627	120.592	41.5302	46.3633	137.079	58.8493	30.8731	76.1224	37.0843	34.9665	70.4391	24.2583	27.0814	80.0692	34.3746
chr3:17621291:17622078	chr3	17621291	17622078	.	788	5.31748	3.57266	4.33267e-06	0.000279148	0	33.9379	3.84777	1.55488	26.5523	5.32438	0	18.2154	7.29106	0	43.0684	4.88296	1.97319	33.6958	6.75683	0	23.116	9.25262
chr2:31652822:31653822	chr2	31652822	31653822	.	1001	2.26862	5.32016	4.48198e-06	0.000286847	2.73387	82.8084	28.8583	29.5426	77.4442	17.038	11.5908	59.2772	38.5385	2.73114	82.7257	28.8295	29.5131	77.3668	17.021	11.5793	59.218	38.5
chr16:85038035:85038787	chr16	85038035	85038787	.	753	2.75012	4.28863	7.62854e-05	0.00253092	6.37903	31.2229	11.5433	1.55488	24.3396	38.3355	2.67481	17.5979	30.7266	8.47149	41.4646	15.3298	2.06491	32.3235	50.9104	3.5522	23.3704	40.8056
chr6:73819203:73820090	chr6	73819203	73820090	.	888	3.86657	3.9891	4.54077e-06	0.000288689	0	28.5078	0.961944	0.777438	44.2538	1.06488	7.13282	43.8404	1.56237	0	32.1034	1.08327	0.875493	49.8354	1.19918	8.03245	49.3699	1.75943
chr11:28858068:28858799	chr11	28858068	28858799	.	732	4.77677	3.42302	0.000289391	0.00693192	0	6.78758	31.7441	0.777438	14.3825	12.7785	0	9.26206	8.85344	0	9.27265	43.3663	1.06207	19.6482	17.457	0	12.6531	12.0949
chr5:71434656:71435096	chr5	71434656	71435096	.	441	8.06406	3.68999	3.24319e-07	3.61434e-05	0	20.3627	2.88583	0	17.7015	19.1678	0	33.9609	6.24948	0	46.174	6.54383	0	40.1395	43.4643	0	77.0088	14.1712
chr20:11830855:11832023	chr20	11830855	11832023	.	1169	2.43537	4.86277	4.71271e-06	0.000297003	19.1371	36.6529	8.65749	9.32925	85.1886	6.38926	5.34961	60.5121	16.6653	16.3705	31.3541	7.4059	7.98054	72.8731	5.46557	4.57623	51.764	14.256
chr8:121755373:121755968	chr8	121755373	121755968	.	596	3.46135	4.35731	1.68477e-06	0.00013143	0	29.8653	27.8964	3.88719	29.8713	15.9731	4.45801	35.8133	22.394	0	50.1096	46.806	6.52213	50.1197	26.8006	7.47989	60.0894	37.5738
chr6:110224517:110225517	chr6	110224517	110225517	.	1001	8.1954	3.48956	5.10068e-06	0.000316615	0	28.5078	9.61944	0	30.9777	0	0	21.3027	0	0	28.4793	9.60983	0	30.9467	0	0	21.2815	0
chr6:120112686:120113386	chr6	120112686	120113386	.	701	2.89275	4.67758	5.19985e-06	0.000320702	3.64516	52.9431	6.7336	14.7713	63.0617	23.4273	0.891602	35.8133	18.7485	5.19994	75.5251	9.60571	21.0718	89.9596	33.4198	1.2719	51.0889	26.7453
chr3:30327651:30328784	chr3	30327651	30328784	.	1134	2.03445	5.24664	5.24111e-06	0.000322557	20.9597	67.8758	37.5158	14.7713	94.0394	13.8434	14.2656	46.3103	22.394	18.483	59.8552	33.0827	13.0259	82.9271	12.2076	12.5799	40.838	19.7478
chr8:127054627:127055839	chr8	127054627	127055839	.	1213	2.79271	4.60436	9.6692e-06	0.000529586	7.29032	44.798	41.3636	5.44207	32.084	38.3355	1.7832	27.1687	11.4574	6.01016	36.9316	34.1002	4.48645	26.4501	31.6039	1.47008	22.398	9.4455
chr13:77427256:77427626	chr13	77427256	77427626	.	371	4.33341	3.82532	5.32608e-06	0.000327089	0	33.9379	3.84777	3.10975	15.4888	3.19463	0.891602	39.5181	10.9366	0	91.4768	10.3714	8.38208	41.7489	8.61086	2.40324	106.518	29.4787
chr1:115970788:115972268	chr1	115970788	115972268	.	1481	1.91906	5.2485	5.65609e-06	0.000344425	17.3145	71.9483	27.8964	21.7683	64.168	36.2058	12.4824	61.4383	17.7069	11.6911	48.5809	18.8362	14.6984	43.3275	24.4468	8.42838	41.4844	11.956
chr1:164613982:164614825	chr1	164613982	164614825	.	844	2.99197	4.3095	5.70353e-06	0.000346583	8.20161	40.7255	10.5814	5.44207	33.1904	12.7785	0.891602	43.223	9.89502	9.71755	48.2529	12.5372	6.44794	39.3251	15.1404	1.0564	51.212	11.724
chr4:157397322:157397953	chr4	157397322	157397953	.	632	1.96083	5.43411	2.30563e-06	0.00016848	14.5806	38.0104	56.7547	13.9939	86.295	46.8545	17.832	56.4986	45.3088	23.0706	60.1431	89.8017	22.1422	136.543	74.1369	28.2153	89.3965	71.6911
chr9:84105788:84106650	chr9	84105788	84106650	.	863	3.06494	4.75485	6.22925e-06	0.000373807	19.1371	57.0156	2.88583	2.33231	50.8919	14.9083	0	68.5393	13.0198	22.1751	66.0668	3.34395	2.70257	58.9709	17.2749	0	79.4198	15.0866
chr5:82577502:82578042	chr5	82577502	82578042	.	541	1.3691	5.56065	0.000178498	0.00484214	18.2258	65.1607	65.4122	29.5426	45.3602	53.2438	15.1572	54.3374	65.0988	33.6891	120.445	120.91	54.6075	83.845	98.4174	28.0171	100.439	120.33
chr10:55663743:55665399	chr10	55663743	55665399	.	1657	3.97538	3.87366	6.35874e-06	0.000379722	0	38.0104	0	3.88719	22.1269	0	2.67481	48.7802	0	0	22.9393	0	2.34592	13.3536	0	1.61425	29.4389	0
chrY:13480037:13483412	chrY	13480037	13483412	.	3376	0.830488	8.65636	6.50593e-06	0.00038719	339.911	480.56	370.348	241.783	524.408	343.955	311.169	578.261	427.048	100.685	142.346	109.7	71.6182	155.334	101.882	92.171	171.286	126.495
chr10:4712811:4714785	chr10	4712811	4714785	.	1975	1.05316	6.51798	7.13748e-05	0.00240112	47.3871	88.2385	90.4227	62.195	123.911	125.655	45.4717	109.601	118.219	23.9935	44.6777	45.7836	31.4912	62.7396	63.623	23.0237	55.4942	59.8579
chr5:73312176:73314340	chr5	73312176	73314340	.	2165	1.09803	6.52212	3.81703e-05	0.00150307	35.5403	107.244	103.89	56.753	99.5711	115.007	61.5206	121.333	112.491	16.4158	49.5352	47.9861	26.2138	45.9913	53.1208	28.416	56.043	51.9588
chr11:9830128:9830936	chr11	9830128	9830936	.	809	1.74598	4.75183	0.000380431	0.00857871	6.37903	24.4353	39.4397	7.77438	29.8713	31.9463	12.4824	34.2696	41.1424	7.88508	30.2043	48.7512	9.60986	36.9238	39.4886	15.4295	42.3605	50.8559
chr4:114276713:114277765	chr4	114276713	114277765	.	1053	1.31609	6.50816	6.71469e-06	0.000397158	42.8306	101.814	71.1838	74.634	170.377	100.098	38.3389	119.172	88.0136	40.6749	96.6891	67.601	70.8775	161.802	95.0601	36.4092	113.174	83.5836
chr5:52023563:52024231	chr5	52023563	52024231	.	669	5.09773	3.60777	6.78567e-06	0.000400535	0	19.0052	0	2.33231	55.3173	0	0	21.3027	1.04158	0	28.4084	0	3.48627	82.6865	0	0	31.8427	1.55692
chr5:136570691:136571866	chr5	136570691	136571866	.	1176	1.68121	5.57297	6.95978e-06	0.000408307	38.2742	104.529	27.8964	27.2103	67.4871	18.1029	16.9404	92.6206	22.9148	32.5461	88.8849	23.7214	23.138	57.387	15.3936	14.4051	78.759	19.4854
chrY:13485236:13486848	chrY	13485236	13486848	.	1613	0.912368	7.85773	7.05156e-06	0.000412852	184.992	328.519	231.828	130.61	306.458	207.651	165.838	273.231	246.334	114.688	203.669	143.725	80.9731	189.992	128.736	102.813	169.393	152.718
chr7:83654678:83655234	chr7	83654678	83655234	.	557	1.3619	5.4229	0.000234759	0.00595962	17.3145	44.798	55.7927	20.9908	47.5729	66.0223	18.7237	53.72	47.9127	31.0853	80.4273	100.166	37.6855	85.4091	118.532	33.6152	96.4452	86.0192
chr6:119576469:119577154	chr6	119576469	119577154	.	686	5.33626	3.51487	2.78025e-05	0.00119064	0	17.6477	18.2769	0.777438	5.53173	10.6488	0	20.994	13.5405	0	25.7255	26.6428	1.13329	8.06374	15.523	0	30.6035	19.7384
chr20:1755535:1756331	chr20	1755535	1756331	.	797	1.82065	5.46367	1.70644e-05	0.000823656	25.5161	38.0104	41.3636	16.3262	71.9125	56.4384	7.13282	61.7471	64.0572	32.0152	47.6919	51.8991	20.4846	90.2289	70.8136	8.94959	77.4744	80.3729
chr2:139273534:139274376	chr2	139273534	139274376	.	843	3.2782	4.21394	2.27945e-05	0.00102803	0	16.2902	12.5053	5.44207	28.765	37.2707	1.7832	29.3299	21.3524	0	19.3241	14.8342	6.45559	34.1222	44.2119	2.11531	34.7922	25.3291
chr3:126630153:126630774	chr3	126630153	126630774	.	622	2.20171	4.78952	4.13217e-05	0.00159453	6.37903	35.2954	24.0486	11.6616	25.4459	57.5033	4.45801	43.5317	27.0811	10.2557	56.745	38.6633	18.7485	40.9099	92.449	7.16722	69.9866	43.5387
chr3:170872600:170873569	chr3	170872600	170873569	.	970	3.12745	3.8437	0.000262523	0.00647094	0	14.9327	20.2008	3.10975	9.95711	18.1029	1.7832	20.3765	24.9979	0	15.3945	20.8256	3.20593	10.2651	18.6628	1.83836	21.0067	25.7711
chr20:38290291:38291026	chr20	38290291	38291026	.	736	3.53525	4.07716	8.96687e-06	0.000502661	0	36.6529	6.7336	3.10975	48.6792	2.12975	6.24122	27.4775	9.89502	0	49.8002	9.14892	4.22521	66.1402	2.89368	8.47991	37.3335	13.4443
chr3:36403758:36405039	chr3	36403758	36405039	.	1282	1.08417	7.1933	9.00346e-06	0.000502661	85.6613	251.14	145.253	127.5	245.609	93.7091	96.2931	167.952	93.7423	66.8185	195.897	113.302	99.4538	191.582	73.096	75.1116	131.008	73.1219
chr2:19386950:19387601	chr2	19386950	19387601	.	652	3.26919	4.63542	1.54572e-07	2.0007e-05	2.73387	42.083	21.1628	2.33231	50.8919	23.4273	8.02442	35.1958	26.0395	4.19305	64.5444	32.4582	3.57717	78.0551	35.9314	12.3074	53.9813	39.9379
chr3:133727493:133728703	chr3	133727493	133728703	.	1211	1.61161	5.69609	8.7741e-06	0.00049464	26.4274	63.8032	76.9555	25.6555	61.9554	48.9843	14.2656	76.2576	58.3285	21.8228	52.6864	63.5471	21.1853	51.1605	40.4495	11.78	62.9708	48.1656
chr1:224267254:224268465	chr1	224267254	224268465	.	1212	3.21677	4.10084	9.92982e-06	0.000538749	1.82258	24.4353	22.1247	3.88719	24.3396	19.1678	1.7832	24.3901	19.2692	1.50378	20.1611	18.2547	3.20725	20.0822	15.815	1.47129	20.1238	15.8987
chr9:118701221:118702039	chr9	118701221	118702039	.	819	2.64084	4.62448	9.54143e-06	0.00052685	5.46774	39.3679	17.315	1.55488	45.3602	14.9083	13.374	41.6793	29.1643	6.67612	48.0683	21.1416	1.89851	55.3848	18.203	16.3297	50.8905	35.6096
chr6:16539100:16540419	chr6	16539100	16540419	.	1320	1.28019	6.68447	1.47925e-06	0.0001196	50.121	123.534	109.662	48.9786	137.187	139.499	66.8702	140.783	96.3462	37.9704	93.5863	83.0769	37.105	103.929	105.681	50.6592	106.654	72.9896
chr14:31022534:31023169	chr14	31022534	31023169	.	636	2.0914	5.02558	9.7424e-06	0.000532585	10.9355	81.4509	11.5433	23.3231	51.9982	24.4921	8.91602	55.2636	14.5821	17.1942	128.067	18.1499	36.6716	81.7582	38.5097	14.0189	86.8925	22.9279
chr3:197036366:197037220	chr3	197036366	197037220	.	855	2.29512	4.91753	9.77363e-06	0.000533282	2.73387	74.6633	25.9725	16.3262	53.1046	20.2326	13.374	37.6657	18.7485	3.19751	87.3255	30.3772	19.095	62.1106	23.6639	15.6421	44.0535	21.928
chr9:87326497:87327250	chr9	87326497	87327250	.	754	2.3954	4.59691	9.81766e-06	0.000534673	8.20161	48.8706	10.5814	10.8841	48.6792	13.8434	8.91602	51.2501	4.16632	10.8775	64.8151	14.0337	14.4352	64.5613	18.3599	11.825	67.9709	5.52563
chr11:65678591:65679341	chr11	65678591	65679341	.	751	2.68729	4.89105	1.0096e-05	0.000542662	17.3145	61.0882	18.2769	12.439	47.5729	3.19463	0	82.7411	8.85344	23.0553	81.3425	24.3368	16.5633	63.346	4.25383	0	110.175	11.7889
chr13:95417079:95417444	chr13	95417079	95417444	.	366	3.51704	4.12218	1.01564e-05	0.000544895	1.82258	24.4353	10.5814	4.66463	32.084	23.4273	1.7832	41.6793	2.08316	4.97973	66.763	28.9109	12.7449	87.6613	64.0089	4.87214	113.878	5.6917
chr5:148170680:148171374	chr5	148170680	148171374	.	695	3.42222	4.10934	1.09717e-05	0.000580014	2.73387	19.0052	13.4672	6.2195	49.7856	10.6488	0	32.4172	7.81186	3.93363	27.3456	19.3773	8.94893	71.6339	15.322	0	46.6435	11.2401
chr13:74295799:74297059	chr13	74295799	74297059	.	1261	2.58869	4.01484	0.000441675	0.0096358	3.64516	20.3627	26.9344	3.88719	19.9142	30.8814	0.891602	13.2756	15.1029	2.89069	16.1481	21.3596	3.08262	15.7924	24.4896	0.70706	10.5279	11.9769
chr11:123044078:123044533	chr11	123044078	123044533	.	456	2.6028	4.3203	1.18549e-05	0.000618508	7.29032	46.1555	10.5814	6.2195	36.5094	7.45413	6.24122	38.9007	8.33265	15.9875	101.218	23.2048	13.6393	80.0645	16.3468	13.6869	85.3085	18.2733
chr17:39222129:39223190	chr17	39222129	39223190	.	1062	1.23409	6.4835	1.20117e-05	0.000621336	83.8387	145.254	75.0316	55.1981	138.293	48.9843	39.2305	136.152	70.8275	78.9441	136.774	70.6512	51.9756	130.22	46.1246	36.9402	128.204	66.6926
chr1:192528139:192529214	chr1	192528139	192529214	.	1076	1.35274	6.0714	1.21243e-05	0.000626041	27.3387	100.456	67.336	47.4237	88.5076	59.6331	42.7969	111.145	47.3919	25.4077	93.3607	62.58	44.0741	82.2562	55.4211	39.7741	103.294	44.0445
chr6:152407965:152408898	chr6	152407965	152408898	.	934	3.63327	4.58987	1.24344e-07	1.66933e-05	3.64516	39.3679	18.2769	6.2195	45.3602	26.6219	0	43.8404	20.3108	3.90274	42.1498	19.5684	6.659	48.5655	28.5031	0	46.9384	21.7461
chr4:37322352:37323446	chr4	37322352	37323446	.	1095	2.61245	4.12236	0.000315727	0.00742114	0	17.6477	22.1247	4.66463	17.7015	24.4921	4.45801	22.2289	28.6435	0	16.1166	20.2052	4.25993	16.1658	22.3673	4.07124	20.3004	26.1584
chr16:51655566:51656105	chr16	51655566	51656105	.	540	3.29107	3.9078	1.25459e-05	0.000643208	2.73387	33.9379	2.88583	3.10975	33.1904	4.2595	4.45801	35.8133	1.56237	5.06272	62.8479	5.34413	5.7588	61.4636	7.88797	8.25558	66.3209	2.89328
chrY:13483656:13485002	chrY	13483656	13485002	.	1347	1.2725	7.36307	4.23634e-08	6.94759e-06	97.508	247.068	155.835	87.8505	210.206	158.667	95.4015	221.981	194.255	72.389	183.421	115.69	65.2194	156.055	117.793	70.8251	164.796	144.213
chr2:6696704:6697904	chr2	6696704	6697904	.	1201	1.92675	5.15624	1.18807e-05	0.000618508	11.8468	54.3006	41.3636	13.9939	29.8713	40.4653	11.5908	57.7335	45.3088	9.86409	45.2128	34.4409	11.6519	24.872	33.693	9.65098	48.0712	37.7259
chr5:16803902:16804579	chr5	16803902	16804579	.	678	1.56686	5.39289	5.83502e-05	0.00207264	20.0484	47.513	59.6405	14.7713	57.53	36.2058	17.832	50.9413	59.8909	29.5699	70.0782	87.9653	21.7866	84.8525	53.4009	26.301	75.1347	88.3346
chr11:127520922:127521963	chr11	127520922	127521963	.	1042	3.15651	4.00325	1.31807e-05	0.000668627	1.82258	36.6529	3.84777	3.88719	29.8713	8.51901	5.34961	34.5784	6.77027	1.74912	35.1755	3.69268	3.73051	28.6673	8.17563	5.13399	33.1846	6.49738
chr1:240194383:240194992	chr1	240194383	240194992	.	610	2.26689	4.78818	1.36682e-05	0.000689718	10.9355	65.1607	5.77166	19.4359	27.6586	5.32438	6.24122	83.6673	7.81186	17.927	106.821	9.46174	31.8622	45.342	8.72849	10.2315	137.159	12.8063
chr12:15949001:15950184	chr12	15949001	15950184	.	1184	1.20292	6.40606	1.37903e-05	0.000692526	51.9435	171.047	61.5644	53.6432	94.0394	60.6979	65.9786	131.521	60.9325	43.8712	144.465	51.9969	45.3068	79.4251	51.2651	55.7252	111.082	51.4632
chr7:16168701:16170024	chr7	16168701	16170024	.	1324	2.06125	4.86548	3.84414e-05	0.00150927	5.46774	36.6529	29.8202	13.9939	30.9777	29.8165	7.13282	44.4579	48.4335	4.12971	27.6835	22.5228	10.5694	23.397	22.52	5.38733	33.5785	36.5812
chr1:164702027:164702958	chr1	164702027	164702958	.	932	2.42862	4.4294	1.48064e-05	0.000736567	9.1129	43.4405	7.69555	7.77438	43.1475	3.19463	8.91602	52.485	4.16632	9.77779	46.61	8.25703	8.34161	46.2956	3.42771	9.56655	56.3144	4.4703
chr9:124330983:124332034	chr9	124330983	124332034	.	1052	3.01474	4.14833	1.48518e-05	0.000736567	6.37903	50.2281	1.92389	3.88719	39.8284	3.19463	5.34961	37.9745	0	6.06372	47.7453	1.82879	3.69505	37.8597	3.03672	5.08519	36.0974	0
chr9:126817039:126817549	chr9	126817039	126817549	.	511	3.51236	3.87824	1.48507e-05	0.000736567	0.91129	24.4353	10.5814	1.55488	32.084	9.58388	4.45801	25.0076	10.9366	1.78335	47.8185	20.7072	3.04281	62.7867	18.7552	8.72409	48.9385	21.4023
chr4:121252455:121253703	chr4	121252455	121253703	.	1249	1.87338	5.68321	1.49683e-05	0.000739804	5.46774	76.0209	21.1628	30.3201	92.933	61.7628	28.5313	71.0091	62.4948	4.37769	60.8654	16.9438	24.2755	74.4059	49.4498	22.8433	56.8528	50.0359
chr9:71546432:71547055	chr9	71546432	71547055	.	624	3.76033	4.13543	1.50352e-05	0.00074184	8.20161	42.083	3.84777	0	46.4665	17.038	0	23.4639	8.33265	13.1436	67.4407	6.1663	0	74.4656	27.3045	0	37.6024	13.3536
chr3:171506065:171506675	chr3	171506065	171506675	.	611	3.23171	3.83886	0.000216627	0.00561284	0	20.3627	20.2008	3.88719	14.3825	27.6868	0.891602	15.128	14.5821	0	33.3269	33.0619	6.36201	23.5393	45.3139	1.45925	24.7595	23.866
chr9:22147724:22148638	chr9	22147724	22148638	.	915	1.71462	6.29502	6.57199e-08	1.00471e-05	38.2742	116.746	54.8308	32.6524	131.655	96.9037	34.7725	100.956	88.0136	41.8297	127.592	59.9243	35.6857	143.885	105.906	38.0027	110.335	96.1897
chr3:31402800:31403375	chr3	31402800	31403375	.	576	5.19819	3.465	1.67975e-05	0.00081899	1.82258	32.5804	3.84777	0	26.5523	3.19463	0	15.4368	6.24948	3.1642	56.5631	6.68016	0	46.0977	5.54623	0	26.7999	10.8498
chr1:209576627:209578052	chr1	209576627	209578052	.	1426	1.65773	5.41661	1.6968e-05	0.000821754	17.3145	99.0986	15.3911	24.1006	57.53	14.9083	36.5557	89.5333	17.1861	12.142	69.4941	10.7932	16.9008	40.3436	10.4546	25.6351	62.7863	12.052
chr2:31607280:31608168	chr2	31607280	31608168	.	889	1.38042	7.01203	4.37443e-07	4.60816e-05	90.2177	162.902	144.292	75.4115	195.823	118.201	37.4473	171.039	153.112	101.482	183.242	162.308	84.8273	220.274	132.96	42.123	192.395	172.23
chr6:117488604:117489596	chr6	117488604	117489596	.	993	2.55991	4.4791	1.70083e-05	0.000822327	3.64516	28.5078	21.1628	6.2195	55.3173	15.9731	10.6992	38.5919	8.33265	3.67086	28.7088	21.3119	6.26335	55.7072	16.0857	10.7747	38.864	8.39139
chr12:63126504:63127163	chr12	63126504	63127163	.	660	1.81822	5.21692	2.90073e-05	0.00123127	10.9355	27.1503	37.5158	15.5488	64.168	54.3087	14.2656	51.8675	44.788	16.5689	41.1368	56.8421	23.5587	97.2243	82.2859	21.6146	78.5872	67.8606
chr1:67855490:67856577	chr1	67855490	67856577	.	1088	3.27363	3.89564	1.73266e-05	0.000830156	2.73387	38.0104	4.80972	3.88719	33.1904	1.06488	3.56641	30.5648	4.16632	2.51275	34.9361	4.4207	3.57278	30.5059	0.978746	3.27795	28.0927	3.82934
chr13:104792133:104793604	chr13	104792133	104793604	.	1472	1.52316	5.60266	1.7313e-05	0.000830156	21.871	80.0934	37.5158	26.4329	76.3378	53.2438	25.8565	59.8947	44.788	14.858	54.4113	25.4863	17.9571	51.8599	36.1711	17.5655	40.6893	30.4266
chr14:79511382:79512128	chr14	79511382	79512128	.	747	3.83373	3.79698	1.83863e-05	0.000871433	3.64516	19.0052	4.80972	2.33231	33.1904	8.51901	0	35.8133	2.60395	4.87973	25.4421	6.43871	3.12224	44.4315	11.4043	0	47.9428	3.48588
chr15:98234557:98235617	chr15	98234557	98235617	.	1061	1.70547	5.26263	1.84643e-05	0.000873692	18.2258	54.3006	15.3911	27.2103	84.0823	21.2975	20.5069	76.8751	14.0613	17.1779	51.1787	14.5062	25.6459	79.2481	20.0731	19.3279	72.4553	13.2529
chr17:64633772:64634081	chr17	64633772	64634081	.	310	2.973	4.30794	1.87391e-05	0.000880919	4.55645	35.2954	7.69555	0.777438	36.5094	28.7516	8.02442	33.0347	11.9782	14.6982	113.856	24.8243	2.50786	117.772	92.7473	25.8852	106.564	38.6393
chr9:91266496:91267816	chr9	91266496	91267816	.	1321	3.38544	3.98696	1.87121e-05	0.000880919	0.91129	35.2954	0.961944	4.66463	38.7221	1.06488	4.45801	34.8871	8.33265	0.689849	26.7187	0.728193	3.53113	29.3127	0.806113	3.37473	26.4096	6.30783
chr9:101751409:101752222	chr9	101751409	101752222	.	814	2.58184	4.64593	1.87753e-05	0.000881187	0.91129	59.7307	11.5433	5.44207	45.3602	7.45413	20.5069	56.1898	5.72869	1.11952	73.3792	14.181	6.68558	55.725	9.15741	25.1927	69.0293	7.03771
chr5:17910279:17910921	chr5	17910279	17910921	.	643	3.54367	3.93489	1.90636e-05	0.00089182	7.29032	50.2281	0	0	37.6157	1.06488	2.67481	29.0211	0.52079	11.338	78.1152	0	0	58.5004	1.65611	4.15989	45.1339	0.809938
chr9:18459743:18460195	chr9	18459743	18460195	.	453	4.94291	3.52803	2.02557e-05	0.000943002	0	29.8653	0	2.33231	35.4031	1.06488	0	20.6853	3.64553	0	65.9279	0	5.1486	78.1524	2.35072	0	45.6629	8.04753
chr4:21471313:21473090	chr4	21471313	21473090	.	1778	3.24458	4.06295	2.14216e-05	0.000987379	1.82258	23.0778	1.92389	4.66463	48.6792	0	5.34961	42.6055	6.77027	1.02507	12.9796	1.08205	2.62353	27.3786	0	3.00878	23.9626	3.8078
chr2:31559979:31561567	chr2	31559979	31561567	.	1589	3.6144	3.81631	2.15536e-05	0.000988224	4.55645	25.7928	3.84777	1.55488	37.6157	11.7136	0.891602	24.6988	4.68711	2.8675	16.2321	2.42151	0.978525	23.6726	7.3717	0.561109	15.5436	2.94973
chr2:109029467:109030194	chr2	109029467	109030194	.	728	2.63887	4.32995	2.16037e-05	0.000988224	9.1129	32.5804	21.1628	4.66463	35.4031	8.51901	3.56641	40.1356	11.9782	12.5177	44.7533	29.0697	6.40746	48.6306	11.7019	4.89891	55.1313	16.4535
chr3:186708520:186709867	chr3	186708520	186709867	.	1348	1.81924	5.18131	2.15851e-05	0.000988224	19.1371	73.3058	31.7441	10.1067	45.3602	36.2058	19.6153	54.3374	25.5187	14.1967	54.3812	23.5491	7.49755	33.65	26.8589	14.5514	40.3097	18.9308
chr7:119184951:119185837	chr7	119184951	119185837	.	887	1.98586	4.77468	0.000262415	0.00647094	6.37903	21.7202	27.8964	15.5488	35.4031	46.8545	1.7832	37.9745	38.0177	7.19169	24.4873	31.4502	17.5296	39.9133	52.8236	2.01038	42.8122	42.861
chr16:10964830:10965822	chr16	10964830	10965822	.	993	2.70435	5.59167	8.98266e-09	2.00989e-06	24.6048	86.881	39.4397	10.8841	88.5076	44.7248	3.56641	79.6537	43.7464	24.7783	87.4934	39.7177	10.9609	89.1316	45.0401	3.59155	80.2152	44.0548
chr8:72742956:72744236	chr8	72742956	72744236	.	1281	2.78522	4.73653	2.25937e-05	0.00102217	0	43.4405	3.84777	21.7683	70.8061	6.38926	2.67481	61.7471	14.5821	0	33.9114	3.00373	16.9932	55.2741	4.98771	2.08806	48.2022	11.3834
chr20:38484047:38485102	chr20	38484047	38485102	.	1056	4.91332	3.56752	2.27819e-05	0.00102803	0	29.8653	0	2.33231	27.6586	1.06488	0	26.2425	6.24948	0	28.2816	0	2.20863	26.1919	1.00841	0	24.8509	5.91807
chr3:110532334:110534686	chr3	110532334	110534686	.	2353	0.794199	8.16912	2.2947e-05	0.0010333	181.347	363.814	306.86	223.125	341.861	254.505	226.467	387.463	291.643	77.0704	154.617	130.412	94.8256	145.287	108.162	96.2461	164.668	123.945
chr2:28211480:28212590	chr2	28211480	28212590	.	1111	1.69093	5.55323	2.31942e-05	0.00103846	21.871	52.9431	41.3636	34.2073	89.614	52.1789	8.91602	69.4655	39.0593	19.6858	47.6536	37.2309	30.7896	80.6607	46.9657	8.02522	62.5252	35.1569
chr5:151087698:151088433	chr5	151087698	151088433	.	736	3.01302	4.13373	5.93877e-05	0.00209812	0.91129	24.4353	12.5053	6.2195	25.4459	21.2975	0.891602	20.0678	32.289	1.23817	33.2001	16.9909	8.45041	34.5733	28.9368	1.21142	27.266	43.8709
chrY:58989301:58990528	chrY	58989301	58990528	.	1228	1.01103	7.09023	2.36811e-05	0.00105321	126.669	195.482	114.471	77.7438	241.183	97.9686	89.1602	158.381	114.053	103.151	159.187	93.2177	63.3093	196.403	79.779	72.6061	128.975	92.8771
chr12:52549568:52550699	chr12	52549568	52550699	.	1132	2.22261	4.61169	2.43429e-05	0.0010764	6.37903	42.083	17.315	11.6616	54.2109	8.51901	10.6992	40.1356	16.6653	5.63519	37.1758	15.2959	10.3017	47.8895	7.52562	9.45162	35.4555	14.722
chr1:63577626:63578755	chr1	63577626	63578755	.	1130	4.13929	3.82451	1.19711e-05	0.000620944	0	10.8601	13.4672	2.33231	33.1904	15.9731	0.891602	19.7591	17.1861	0	9.61073	11.9179	2.06399	29.372	14.1355	0.789029	17.4859	15.2089
chr20:56677530:56678374	chr20	56677530	56678374	.	845	3.65353	3.9472	2.43517e-05	0.0010764	6.37903	28.5078	13.4672	0	34.2967	3.19463	0.891602	28.7124	10.4158	7.54915	33.7371	15.9375	0	40.5878	3.78062	1.05515	33.9792	12.3264
chr9:118863016:118864222	chr9	118863016	118864222	.	1207	2.46782	4.46038	2.45099e-05	0.00108008	6.37903	43.4405	7.69555	4.66463	42.0411	18.1029	12.4824	44.7666	6.24948	5.28503	35.9905	6.37576	3.86465	34.8311	14.9983	10.3417	37.0892	5.1777
chr6:73830837:73831650	chr6	73830837	73831650	.	814	3.11391	4.88287	1.61647e-07	2.04041e-05	1.82258	70.5908	1.92389	6.99694	63.0617	0	16.9404	89.5333	0	2.23904	86.7209	2.3635	8.59575	77.4714	0	20.8114	109.992	0
chrY:13465923:13467581	chrY	13465923	13467581	.	1659	0.926684	7.62889	2.45505e-05	0.00108022	194.105	300.011	158.721	119.725	267.736	139.499	123.041	263.351	202.587	117.001	180.838	95.6725	72.1672	161.384	84.086	74.1658	158.741	122.114
chr10:93411845:93413727	chr10	93411845	93413727	.	1883	0.930892	7.32649	2.97181e-05	0.00125041	111.177	204.985	208.742	76.9664	203.568	171.445	114.125	169.804	171.861	59.0427	108.861	110.856	40.8743	108.108	91.0489	60.6081	90.1776	91.2697
chr4:157267974:157269452	chr4	157267974	157269452	.	1479	1.1574	7.38252	6.00479e-07	6.01814e-05	122.113	198.197	160.645	79.2987	205.78	185.288	94.5099	250.693	191.13	82.5645	134.008	108.617	53.6164	139.135	125.28	63.9012	169.502	129.229
chr1:42346033:42346464	chr1	42346033	42346464	.	432	4.27401	3.51528	0.000224954	0.00577161	0	12.2176	9.61944	0	7.74442	23.4273	1.7832	17.5979	15.6237	0	28.2816	22.2672	0	17.9269	54.2298	4.12779	40.7359	36.166
chr1:246319216:246320742	chr1	246319216	246320742	.	1527	2.78202	4.53627	9.87097e-06	0.000536564	6.37903	46.1555	19.2389	5.44207	12.1698	36.2058	2.67481	42.2968	24.4771	4.17749	30.2263	12.5991	3.56389	7.96975	23.7104	1.75167	27.6992	16.0296
chr12:110275810:110276653	chr12	110275810	110276653	.	844	2.34434	4.49904	5.84606e-05	0.00207298	7.29032	39.3679	40.4016	4.66463	24.3396	27.6868	5.34961	25.9338	17.7069	8.63782	46.6445	47.8692	5.52681	28.8384	32.8042	6.33841	30.7272	20.9797
chr21:37297138:37298061	chr21	37297138	37298061	.	924	4.20053	3.60657	2.77096e-05	0.00118962	0	28.5078	1.92389	0.777438	35.4031	3.19463	3.56641	20.6853	4.68711	0	30.8526	2.08213	0.841383	38.315	3.45739	3.85975	22.3867	5.07263
chr17:70618415:70619337	chr17	70618415	70619337	.	923	1.72819	5.43354	4.28827e-05	0.0016416	22.7823	43.4405	51.9449	19.4359	87.4013	55.3735	8.02442	39.2094	49.9959	24.6828	47.0645	56.2784	21.0574	94.6926	59.993	8.69385	42.4804	54.1667
chr3:124829112:124829996	chr3	124829112	124829996	.	885	2.16551	4.65075	2.79412e-05	0.00119304	5.46774	42.083	25.0105	10.8841	36.5094	24.4921	9.80763	40.4443	18.7485	6.17824	47.5514	28.2605	12.2985	41.2536	27.6747	11.0821	45.6998	21.1847
chr4:21449163:21449870	chr4	21449163	21449870	.	708	5.29594	3.48136	2.92765e-05	0.00123724	0	33.9379	0	0	25.4459	1.06488	1.7832	19.7591	7.29106	0	47.9349	0	0	35.9406	1.50406	2.51865	27.9083	10.2981
chr20:47549129:47550368	chr20	47549129	47550368	.	1240	3.5856	3.93578	5.51657e-05	0.00199287	0	17.6477	17.315	4.66463	29.8713	21.2975	0	16.0542	18.7485	0	14.232	13.9637	3.7618	24.0898	17.1754	0	12.947	15.1197
chr17:70357944:70359400	chr17	70357944	70359400	.	1457	1.27903	6.11951	3.13077e-05	0.00130399	32.8064	84.166	74.0697	42.7591	100.677	84.1252	44.5801	105.588	44.2672	22.5164	57.7666	50.8371	29.3473	69.0991	57.7386	30.5972	72.4691	30.3824
chr11:130651562:130652358	chr11	130651562	130652358	.	797	2.84403	4.50536	3.16584e-05	0.0013148	0	44.798	9.61944	9.32925	46.4665	38.3355	6.24122	26.86	13.5405	0	56.2083	12.0696	11.7055	58.3018	48.0998	7.83089	33.7014	16.9894
chr6:73659774:73660797	chr6	73659774	73660797	.	1024	2.71939	4.7267	3.17266e-05	0.00131574	0	57.0156	13.4672	3.88719	71.9125	4.2595	23.1817	50.3239	3.64553	0	55.6793	13.1516	3.79608	70.227	4.15967	22.6383	49.1444	3.56009
chr5:103680395:103681157	chr5	103680395	103681157	.	763	3.13961	4.19228	5.6216e-05	0.00201567	0	33.9379	14.4292	6.99694	27.6586	29.8165	0.891602	15.7455	24.4771	0	44.4795	18.9111	9.1703	36.2499	39.078	1.16855	20.6363	32.0801
chr7:14787826:14788573	chr7	14787826	14788573	.	748	1.98365	5.17753	3.25476e-05	0.00134592	2.73387	42.083	30.7822	13.9939	45.3602	47.9194	19.6153	56.1898	52.079	3.65491	56.2607	41.1527	18.7084	60.6419	64.0634	26.2236	75.1201	69.6244
chr12:83409626:83411041	chr12	83409626	83411041	.	1416	1.60236	5.647	1.76235e-05	0.000839413	13.6694	74.6633	75.0316	31.0975	54.2109	53.2438	19.6153	68.848	47.9127	9.6535	52.7283	52.9884	21.9615	38.2846	37.6016	13.8526	48.6215	33.8367
chr1:166139351:166140503	chr1	166139351	166140503	.	1153	2.64842	5.1651	1.58087e-07	2.01014e-05	5.46774	73.3058	33.668	6.2195	64.168	26.6219	16.9404	45.0754	40.6216	4.74219	63.5783	29.2004	5.39419	55.6531	23.0892	14.6925	39.094	35.2313
chr6:102045418:102046327	chr6	102045418	102046327	.	910	2.2898	4.45622	3.34272e-05	0.00136663	8.20161	35.2954	16.353	9.32925	36.5094	14.9083	5.34961	41.0618	16.6653	9.01276	38.7862	17.9704	10.2519	40.1202	16.3827	5.8787	45.1229	18.3135
chr12:53065968:53066757	chr12	53065968	53066757	.	790	3.94273	3.75861	5.67597e-05	0.00203013	0	17.6477	9.61944	3.10975	15.4888	17.038	0	21.6115	21.8732	0	22.3389	12.1765	3.93639	19.6061	21.5671	0	27.3563	27.6876
chr1:214577749:214579016	chr1	214577749	214579016	.	1268	3.04808	4.25681	3.36768e-05	0.00137295	0.91129	35.2954	25.9725	3.88719	58.6363	6.38926	8.02442	16.6717	8.33265	0.718683	27.8355	20.483	3.06561	46.2432	5.03884	6.32841	13.148	6.57149
chr9:118453160:118454306	chr9	118453160	118454306	.	1147	1.27031	6.04984	3.47624e-05	0.00140727	42.8306	124.891	49.0591	53.6432	76.3378	36.2058	40.1221	127.508	32.289	37.3414	108.885	42.7717	46.7683	66.5544	31.5656	34.98	111.166	28.1508
chr6:72187540:72188977	chr6	72187540	72188977	.	1438	2.68902	4.25405	3.49842e-05	0.00141031	2.73387	43.4405	20.2008	6.99694	23.2333	9.58388	4.45801	28.4037	20.3108	1.90116	30.209	14.0479	4.86574	16.1566	6.66473	3.10015	19.7522	14.1244
chr9:101781635:101782525	chr9	101781635	101782525	.	891	1.41934	5.7304	3.4951e-05	0.00141031	36.4516	122.176	27.8964	31.0975	82.9759	11.7136	41.0137	87.3721	26.0395	40.9109	137.123	31.309	34.9018	93.1267	13.1466	46.0311	98.0607	29.225
chr12:79190743:79191527	chr12	79190743	79191527	.	785	5.66272	3.51216	9.21935e-06	0.000512731	0.91129	19.0052	10.5814	0	25.4459	15.9731	0	13.5844	6.77027	1.16088	24.2105	13.4795	0	32.4152	20.3479	0	17.3049	8.62455
chr18:20131695:20132489	chr18	20131695	20132489	.	795	1.7047	5.17231	3.61441e-05	0.00144124	11.8468	66.5183	21.1628	24.1006	49.7856	23.4273	20.5069	68.5393	24.9979	14.9016	83.6708	26.6198	30.3152	62.6233	29.4683	25.7948	86.2129	31.4439
chr9:111240626:111241614	chr9	111240626	111241614	.	989	3.05848	4.98716	2.60186e-08	4.97352e-06	9.1129	66.5183	33.668	8.55182	43.1475	21.2975	2.67481	62.3646	24.9979	9.21426	67.2581	34.0425	8.64693	43.6274	21.5344	2.70456	63.0582	25.276
chr16:16013345:16014554	chr16	16013345	16014554	.	1210	1.29558	5.93954	3.65603e-05	0.00145155	48.2984	120.819	48.0972	34.9847	78.5505	47.9194	32.0977	86.1372	44.2672	39.916	99.8503	39.7497	28.913	64.9178	39.6028	26.527	71.1878	36.5844
chr14:75046423:75047257	chr14	75046423	75047257	.	835	1.79639	6.06004	1.11936e-07	1.55463e-05	33.7177	104.529	78.8794	27.2103	97.3584	43.6599	25.8565	100.03	76.0354	40.3805	125.184	94.4663	32.5872	116.597	52.2873	30.9658	119.797	91.0603
chr3:176484379:176485469	chr3	176484379	176485469	.	1091	1.4669	5.69595	3.78851e-05	0.00149387	35.5403	65.1607	42.3255	31.0975	90.7203	58.5682	15.1572	71.3179	44.2672	32.5759	59.7257	38.7952	28.5037	83.1534	53.683	13.893	65.3693	40.5749
chr11:34323943:34324717	chr11	34323943	34324717	.	775	1.32467	5.94785	3.84929e-05	0.00150927	41.0081	58.3732	63.4883	29.5426	111.741	45.7897	38.3389	99.4128	53.6414	52.9136	75.3202	81.9204	38.1195	144.182	59.0834	49.4696	128.275	69.2147
chr4:22180434:22181387	chr4	22180434	22181387	.	954	3.16533	4.00194	3.84968e-05	0.00150927	8.20161	36.6529	5.77166	1.55488	37.6157	7.45413	0.891602	22.8464	12.499	8.59708	38.4202	6.04996	1.62985	39.4295	7.81355	0.934594	23.948	13.1016
chr9:139587753:139588881	chr9	139587753	139588881	.	1129	1.60193	5.50226	3.85369e-05	0.00150927	12.7581	61.0882	55.7927	30.3201	85.1886	41.5302	22.2901	55.8811	31.7682	11.3003	54.1082	49.4178	26.8557	75.4549	36.7849	19.7432	49.4961	28.1384
chr8:113686144:113687977	chr8	113686144	113687977	.	1834	3.53163	4.00589	3.87107e-05	0.00151197	8.20161	28.5078	4.80972	0	39.8284	1.06488	1.7832	45.3841	0	4.47198	15.5441	2.62253	0	21.7167	0.58063	0.972304	24.746	0
chr13:32329865:32330944	chr13	32329865	32330944	.	1080	2.19801	4.73732	3.90077e-05	0.00151946	18.2258	54.3006	13.4672	11.6616	51.9982	1.06488	7.13282	63.2908	5.2079	16.8757	50.2783	12.4696	10.7977	48.1465	0.985996	6.60446	58.6026	4.82213
chr14:53857472:53859522	chr14	53857472	53859522	.	2051	2.08062	6.1462	3.88713e-09	1.01079e-06	34.629	114.031	59.6405	30.3201	129.442	50.0492	17.832	108.984	79.6809	16.884	55.5979	29.0787	14.7831	63.1119	24.4023	8.69432	53.1368	38.8498
chr9:110762340:110764736	chr9	110762340	110764736	.	2397	0.781265	8.1535	4.17473e-05	0.00160666	240.581	352.954	293.393	199.802	404.922	250.246	183.67	317.38	307.266	100.367	147.248	122.4	83.3548	168.929	104.4	76.625	132.407	128.188
chr16:54407289:54408053	chr16	54407289	54408053	.	765	1.91743	4.84679	4.26299e-05	0.00163409	9.1129	55.6581	9.61944	17.8811	67.4871	9.58388	16.9404	45.6928	15.6237	11.9123	72.7557	12.5744	23.374	88.2184	12.528	22.1444	59.7292	20.4232
chr5:151124559:151125475	chr5	151124559	151125475	.	917	0.890612	6.79239	0.000315082	0.007412	68.3468	118.104	98.1182	80.8535	121.698	163.991	56.171	139.548	136.968	74.533	128.794	106.999	88.1718	132.713	178.834	61.2551	152.179	149.365
chr4:157243467:157244235	chr4	157243467	157244235	.	769	1.7906	5.09115	7.66535e-05	0.00254021	9.1129	59.7307	45.2113	12.439	25.4459	47.9194	16.0488	46.0016	32.8098	11.8503	77.6732	58.7924	16.1756	33.0897	62.3139	20.8698	59.82	42.6655
chr15:74823098:74824132	chr15	74823098	74824132	.	1035	1.18735	6.13283	4.40074e-05	0.00167008	41.9193	105.886	69.2599	38.8719	86.295	51.114	52.6045	110.219	61.9741	40.5018	102.306	66.9178	37.5574	83.3768	49.3855	50.8256	106.491	59.8783
chr5:7742294:7743038	chr5	7742294	7743038	.	745	1.55734	5.50378	4.40317e-05	0.00167008	22.7823	58.3732	15.3911	29.5426	113.954	26.6219	34.7725	83.976	10.4158	30.5802	78.3532	20.6592	39.6546	152.958	35.7341	46.6745	112.72	13.9809
chr7:17813665:17814100	chr7	17813665	17814100	.	436	2.23372	4.52964	4.41972e-05	0.00167416	6.37903	23.0778	14.4292	9.32925	38.7221	22.3624	8.91602	52.7938	15.6237	14.6308	52.9306	33.0944	21.3974	88.8121	51.2899	20.4496	121.087	35.8342
chr10:132516931:132517766	chr10	132516931	132517766	.	836	3.34357	3.89754	4.45351e-05	0.00168349	6.37903	28.5078	6.7336	2.33231	24.3396	9.58388	0	36.4308	5.2079	7.63042	34.1003	8.05455	2.78985	29.1144	11.464	0	43.5775	6.22955
chr2:223896917:223898060	chr2	223896917	223898060	.	1144	1.60058	5.78721	4.79725e-06	0.000301673	20.9597	95.0261	52.9069	24.1006	76.3378	55.3735	29.4229	58.9685	72.3899	18.3214	83.0647	46.2473	21.0669	66.7289	48.4035	25.7193	51.5459	63.2778
chr6:118816375:118817354	chr6	118816375	118817354	.	980	1.70411	5.92728	1.27355e-06	0.000107171	37.3629	90.9535	43.2875	24.1006	80.7632	76.6711	18.7237	89.2245	73.4314	38.1254	92.8097	44.1709	24.5924	82.4115	78.2358	19.1058	91.0454	74.93
chr3:141085271:141086538	chr3	141085271	141086538	.	1268	2.84742	5.07528	3.07938e-08	5.62552e-06	8.20161	38.0104	34.63	10.8841	68.5934	25.557	5.34961	70.0829	27.0811	6.46815	29.9767	27.3107	8.5837	54.0958	20.1554	4.21894	55.2705	21.3573
chr15:91403264:91404098	chr15	91403264	91404098	.	835	2.26946	4.92777	5.59181e-06	0.00034123	8.20161	43.4405	45.2113	6.99694	56.4236	23.4273	12.4824	35.5046	30.7266	9.82229	52.0245	54.1453	8.37957	67.5732	28.0566	14.949	42.5204	36.7984
chr8:86349316:86351070	chr8	86349316	86351070	.	1755	1.48187	5.48287	4.62771e-05	0.00173248	22.7823	82.8084	31.7441	20.2134	63.0617	31.9463	32.9893	67.3043	37.4969	12.9813	47.1843	18.0878	11.5176	35.9326	18.203	18.7973	38.35	21.3658
chr4:98428807:98429605	chr4	98428807	98429605	.	799	1.49472	5.61088	4.68546e-05	0.00174857	42.8306	66.5183	34.63	26.4329	89.614	35.1409	14.2656	78.7275	38.5385	53.6053	83.2519	43.3416	33.0825	112.158	43.9811	17.8544	98.5326	48.2334
chr3:63028716:63029726	chr3	63028716	63029726	.	1011	7.57887	3.32261	1.29397e-05	0.000659879	0	27.1503	7.69555	0	13.2761	14.9083	0	12.6582	4.68711	0	26.8549	7.61182	0	13.1317	14.7461	0	12.5204	4.63612
chr1:218878655:218880264	chr1	218878655	218880264	.	1610	1.16196	6.87293	3.91606e-06	0.000258066	54.6774	135.752	135.634	77.7438	139.4	144.823	70.4366	175.979	106.762	33.9611	84.3177	84.2447	48.2881	86.5836	89.9523	43.7494	109.304	66.3118
chr4:96222480:96223254	chr4	96222480	96223254	.	775	1.50915	5.43604	4.85048e-05	0.00179958	17.3145	58.3732	25.9725	28.7652	75.2315	35.1409	29.4229	80.5799	24.9979	22.3413	75.3202	33.5129	37.1164	97.0729	45.3431	37.965	103.974	32.2554
chr17:67870443:67870950	chr17	67870443	67870950	.	508	2.52496	4.29128	5.12155e-05	0.00188317	5.46774	29.8653	9.61944	3.88719	40.9348	20.2326	7.13282	25.625	21.3524	10.7633	58.79	18.9359	7.65195	80.5803	39.828	14.041	50.443	42.0323
chr9:78638500:78639255	chr9	78638500	78639255	.	756	2.21258	4.91382	1.00344e-05	0.000540359	13.6694	52.9431	27.8964	4.66463	42.0411	41.5302	9.80763	36.4308	31.2474	18.0812	70.0306	36.8999	6.17014	55.61	54.9341	12.9731	48.1889	41.3326
chrY:58993323:58995119	chrY	58993323	58995119	.	1797	0.920453	7.32749	5.22128e-05	0.00190527	102.976	241.638	146.215	84.7407	213.525	132.045	160.488	205	146.863	57.3043	134.467	81.3664	47.1568	118.823	73.4806	89.3091	114.079	81.7267
chr4:93155432:93156408	chr4	93155432	93156408	.	977	2.47234	4.4262	5.32994e-05	0.00193924	2.73387	27.1503	19.2389	3.10975	39.8284	13.8434	14.2656	43.5317	15.1029	2.79823	27.7895	19.6918	3.18296	40.7661	14.1693	14.6015	44.5565	15.4585
chr2:15316793:15317734	chr2	15316793	15317734	.	942	1.52548	5.42729	5.49342e-05	0.00198699	29.1613	54.3006	39.4397	15.5488	61.9554	40.4653	18.7237	64.8344	48.9543	30.9568	57.644	41.868	16.5061	65.77	42.9568	19.8765	68.8264	51.9685
chr11:111501788:111502843	chr11	111501788	111502843	.	1056	3.43895	3.95102	5.32462e-05	0.00193924	0	21.7202	22.1247	3.10975	37.6157	14.9083	2.67481	9.5708	17.7069	0	20.5684	20.9514	2.94484	35.621	14.1177	2.53296	9.06326	16.7679
chr3:14658512:14659563	chr3	14658512	14659563	.	1052	1.71973	5.14923	5.65568e-05	0.00202538	22.7823	50.2281	36.5539	18.6585	51.9982	23.4273	8.91602	62.982	29.6851	21.6561	47.7453	34.747	17.7362	49.428	22.2693	8.47531	59.8688	28.2177
chr6:119941643:119942962	chr6	119941643	119942962	.	1320	1.74471	5.29704	0.000273205	0.00663787	21.871	57.0156	56.7547	20.2134	39.8284	46.8545	0.891602	49.0889	48.4335	16.5689	43.1937	42.996	15.3132	30.1731	35.4959	0.675456	37.1886	36.692
chr4:110331852:110332583	chr4	110331852	110332583	.	732	3.20182	3.94888	5.80647e-05	0.00206656	0	35.2954	11.5433	5.44207	25.4459	13.8434	2.67481	19.7591	14.0613	0	48.2178	15.7696	7.43452	34.7622	18.9117	3.65411	26.9933	19.2095
chr5:133394480:133395246	chr5	133394480	133395246	.	767	2.10385	4.79847	5.8775e-05	0.00208157	10.9355	28.5078	8.65749	10.8841	74.1252	33.0112	10.6992	38.5919	22.9148	14.2575	37.168	11.2875	14.1905	96.643	43.0393	13.9495	50.3154	29.8758
chr2:106535309:106537046	chr2	106535309	106537046	.	1738	1.35564	5.85731	0.000108724	0.00329991	20.9597	77.3784	42.3255	41.2042	80.7632	86.2549	21.3985	60.5121	78.6393	12.0596	44.5215	24.353	23.7078	46.4691	49.6289	12.3121	34.8171	45.247
chr16:10956314:10956795	chr16	10956314	10956795	.	482	2.48325	4.78197	3.09898e-06	0.000213482	8.20161	23.0778	26.9344	5.44207	54.2109	28.7516	8.91602	47.5453	29.6851	17.0158	47.8792	55.8805	11.2906	112.471	59.6507	18.498	98.6416	61.5872
chr3:153317513:153317866	chr3	153317513	153317866	.	354	4.06625	3.76573	2.96603e-05	0.00125041	1.82258	24.4353	14.4292	1.55488	13.2761	25.557	0	23.4639	5.72869	5.14853	69.0262	40.7603	4.3923	37.5032	72.195	0	66.2822	16.1828
chr16:5488020:5489643	chr16	5488020	5489643	.	1624	1.84875	4.89378	6.29321e-05	0.0021911	18.2258	33.9379	26.9344	10.8841	60.849	19.1678	11.5908	50.9413	21.3524	11.2228	20.8977	16.5852	6.70205	37.4686	11.8028	7.13721	31.3678	13.148
chr4:178405492:178406545	chr4	178405492	178406545	.	1054	2.18668	4.55805	7.90266e-05	0.00260094	6.37903	28.5078	31.7441	10.1067	26.5523	33.0112	3.56641	37.0482	21.3524	6.05221	27.0473	30.1178	9.58889	25.1919	31.3199	3.38369	35.1501	20.2584
chr17:27966154:27966951	chr17	27966154	27966951	.	798	1.93789	5.23676	6.39101e-05	0.00220922	6.37903	85.5235	32.7061	35.7621	65.2744	31.9463	7.13282	46.619	18.7485	7.99377	107.172	40.9851	44.8147	81.7975	40.0329	8.93837	58.4199	23.4943
chr8:125116164:125117636	chr8	125116164	125117636	.	1473	1.40133	5.57923	6.75316e-05	0.00229862	23.6935	57.0156	30.7822	27.2103	75.2315	29.8165	36.5557	95.3992	39.0593	16.0852	38.7072	20.8976	18.4727	51.0737	20.242	24.8172	64.7653	26.5168
chr9:33100862:33101793	chr9	33100862	33101793	.	932	2.00706	4.59461	6.77032e-05	0.00230175	9.1129	51.5856	10.5814	13.2164	34.2967	9.58388	11.5908	51.2501	12.499	9.77779	55.3493	11.3534	14.1807	36.799	10.2831	12.4365	54.9894	13.4109
chr17:76337920:76339669	chr17	76337920	76339669	.	1750	1.17117	6.33304	7.01089e-05	0.00236885	82.0161	146.612	64.4502	43.5365	90.7203	56.4384	37.4473	128.743	63.0156	46.8663	83.7781	36.8287	24.878	51.8402	32.2505	21.3985	73.5672	36.0089
chr9:119139625:119140638	chr9	119139625	119140638	.	1014	1.56762	5.23077	7.03106e-05	0.00237085	19.1371	46.1555	30.7822	17.1036	57.53	34.076	19.6153	60.8209	38.5385	18.8729	45.5183	30.3572	16.8675	56.7357	33.6056	19.3444	59.9811	38.0064
chr8:128342406:128343014	chr8	128342406	128343014	.	609	1.62324	5.2861	7.13406e-05	0.00240112	12.7581	42.083	27.8964	22.5457	85.1886	29.8165	23.1817	54.3374	40.1009	20.9492	69.1018	45.8068	37.0209	139.883	48.9598	38.0651	89.224	65.8471
chr3:63033865:63034482	chr3	63033865	63034482	.	618	3.24915	3.92461	0.000130268	0.00380572	5.46774	12.2176	15.3911	0	23.2333	18.1029	0.891602	24.0814	21.8732	8.84748	19.7696	24.9047	0	37.5943	29.2927	1.44272	38.9666	35.3935
chr1:212334608:212335234	chr1	212334608	212335234	.	627	1.8879	4.82693	7.21489e-05	0.0024159	13.6694	32.5804	30.7822	9.32925	39.8284	26.6219	12.4824	56.4986	18.7485	21.8012	51.9623	49.0944	14.8792	63.5222	42.4592	19.9082	90.1094	29.9018
chr3:197121109:197122373	chr3	197121109	197122373	.	1265	1.24199	6.06749	7.47858e-05	0.00249263	32.8064	67.8758	47.1352	45.0914	98.4648	92.6442	38.3389	106.205	60.9325	25.9339	53.6567	37.2611	35.6454	77.8378	73.2365	30.3074	83.9565	48.168
chr2:9305420:9306591	chr2	9305420	9306591	.	1172	2.91547	3.97597	7.77687e-05	0.00256915	4.55645	21.7202	19.2389	4.66463	33.1904	7.45413	1.7832	29.9473	5.72869	3.88776	18.5326	16.4154	3.98006	28.3194	6.36018	1.52151	25.5523	4.88796
chr4:113048572:113049733	chr4	113048572	113049733	.	1162	2.86161	4.0959	7.77936e-05	0.00256915	0	28.5078	2.88583	9.32925	40.9348	6.38926	5.34961	40.7531	5.2079	0	24.5334	2.4835	8.02862	35.2279	5.4985	4.6038	35.0715	4.48184
chr10:32980746:32981807	chr10	32980746	32981807	.	1062	2.52487	4.5873	4.55726e-05	0.00171277	5.46774	32.5804	18.2769	0.777438	21.0206	31.9463	11.5908	46.0016	32.8098	5.14853	30.6783	17.2099	0.732051	19.7934	30.0812	10.9142	43.316	30.8943
chr10:24752595:24753295	chr10	24752595	24753295	.	701	4.65514	3.99153	9.45626e-07	8.58319e-05	0	40.7255	7.69555	3.10975	23.2333	9.58388	0	27.7862	18.2277	0	58.0962	10.978	4.43616	33.143	13.6717	0	39.6379	26.0024
chr14:50865253:50866595	chr14	50865253	50866595	.	1343	7.08985	3.17839	0.00019697	0.00523177	0	12.2176	2.88583	0	19.9142	26.6219	0	5.86597	5.2079	0	9.09727	2.14879	0	14.8282	19.8227	0	4.36781	3.87781
chr7:91654561:91655182	chr7	91654561	91655182	.	622	2.85723	4.23983	8.03661e-05	0.00263302	0	27.1503	14.4292	10.1067	28.765	25.557	1.7832	34.8871	13.5405	0	43.65	23.198	16.2487	46.246	41.0885	2.86689	56.0886	21.7694
chr2:152953537:152954431	chr2	152953537	152954431	.	895	2.56064	4.11523	0.00017671	0.0048073	2.73387	14.9327	12.5053	3.88719	18.8079	26.6219	4.45801	31.1823	24.4771	3.0546	16.6845	13.9724	4.34323	21.0144	29.7451	4.98102	34.8405	27.3488
chr4:155045549:155046737	chr4	155045549	155046737	.	1189	1.41028	5.6107	8.17164e-05	0.00267119	20.0484	89.596	30.7822	34.2073	51.9982	44.7248	27.6397	77.4926	49.9959	16.8615	75.3541	25.8891	28.7698	43.7328	37.6155	23.2462	65.1746	42.0487
chr3:23097274:23098030	chr3	23097274	23098030	.	757	2.75814	4.01336	8.18241e-05	0.00267169	2.73387	21.7202	10.5814	3.10975	42.0411	7.45413	8.02442	30.8735	5.72869	3.61145	28.6925	13.978	4.10799	55.5365	9.84694	10.6003	40.7841	7.56763
chr10:106204960:106205644	chr10	106204960	106205644	.	685	1.26735	5.92975	8.41986e-05	0.00273683	41.9193	80.0934	25.9725	38.8719	109.528	63.8926	38.3389	96.6342	40.6216	61.1961	116.925	37.916	56.7473	159.895	93.2738	55.9692	141.072	59.3017
chr5:148381338:148383115	chr5	148381338	148383115	.	1778	1.08293	6.7063	3.56374e-05	0.00142866	70.1693	161.544	117.357	55.9755	136.081	93.7091	57.9542	98.4866	136.968	39.4653	90.8573	66.0051	31.4823	76.5357	52.7048	32.5951	55.3918	77.0348
chr7:18547962:18549548	chr7	18547962	18549548	.	1587	1.00343	6.71152	8.82215e-05	0.00283566	82.0161	150.684	122.167	72.3017	147.144	106.488	49.0381	114.232	88.0136	51.68	94.9491	76.9797	45.5587	92.7183	67.0999	30.8999	71.9799	55.4591
chr8:136240671:136241519	chr8	136240671	136241519	.	849	2.07339	4.77534	9.0275e-05	0.0028856	14.5806	21.7202	25.9725	11.6616	54.2109	30.8814	2.67481	45.3841	24.9979	17.1739	25.5833	30.5918	13.7357	63.8527	36.3739	3.15054	53.456	29.444
chr22:47642054:47643124	chr22	47642054	47643124	.	1071	4.04112	3.53273	0.000162828	0.00446332	1.82258	23.0778	15.3911	0.777438	7.74442	15.9731	0	16.0542	10.9366	1.70176	21.5479	14.3708	0.725899	7.23102	14.9142	0	14.99	10.2116
chr7:41067737:41069587	chr7	41067737	41069587	.	1851	2.191	5.68004	1.22003e-07	1.66108e-05	20.0484	101.814	30.7822	12.439	99.5711	57.5033	22.2901	53.4112	54.1622	10.8311	55.0047	16.63	6.72015	53.7931	31.0661	12.0422	28.8553	29.261
chr12:92080797:92081423	chr12	92080797	92081423	.	627	2.94293	4.48912	3.37195e-06	0.000229547	8.20161	20.3627	24.0486	2.33231	44.2538	26.6219	3.56641	42.2968	16.1445	13.0807	32.4764	38.355	3.7198	70.5803	42.4592	5.68805	67.4589	25.7488
chr13:44716689:44718024	chr13	44716689	44718024	.	1336	1.68034	5.09568	9.22923e-05	0.00292418	10.0242	39.3679	32.7061	15.5488	61.9554	30.8814	23.1817	54.6462	26.0395	7.50314	29.467	24.4806	11.6383	46.3738	23.1148	17.3515	40.9028	19.4907
chr5:85226726:85227829	chr5	85226726	85227829	.	1104	5.7284	3.19613	9.3343e-05	0.00294776	0	23.0778	1.92389	0.777438	12.1698	1.06488	0	23.4639	4.68711	0	20.9038	1.74265	0.704201	11.0234	0.964562	0	21.2535	4.24557
chr3:168669061:168670356	chr3	168669061	168670356	.	1296	1.24661	6.03147	9.42659e-05	0.00296393	46.4758	116.746	67.336	43.5365	57.53	61.7628	25.8565	100.956	55.7246	35.861	90.082	51.9568	33.593	44.3904	47.6565	19.951	77.8985	42.9974
chr11:13890302:13891305	chr11	13890302	13891305	.	1004	2.72831	5.37821	2.30864e-08	4.56414e-06	14.5806	44.798	40.4016	10.8841	99.5711	46.8545	8.02442	77.1839	19.2692	14.5226	44.6195	40.2407	10.8408	99.1744	46.6679	7.99245	76.8763	19.1925
chrY:58984548:58986751	chrY	58984548	58986751	.	2204	0.814707	7.90072	9.94271e-05	0.00309586	234.202	291.866	159.683	149.268	331.904	209.781	163.163	334.669	262.478	106.262	132.425	72.4513	67.726	150.592	95.1817	74.0305	151.846	119.092
chr5:64494391:64495164	chr5	64494391	64495164	.	774	2.62622	4.41788	4.85059e-05	0.00179958	5.46774	47.513	20.2008	3.88719	13.2761	11.7136	5.34961	31.491	39.0593	7.06426	61.3864	26.0992	5.02221	17.1526	15.1339	6.91165	40.6861	50.4642
chr14:45251830:45252600	chr14	45251830	45252600	.	771	2.5574	4.16575	0.000103925	0.00319116	8.20161	25.7928	14.4292	5.44207	38.7221	18.1029	1.7832	27.7862	9.37423	10.6376	33.4537	18.7149	7.05845	50.2232	23.4798	2.31285	36.0392	12.1585
chr5:98981283:98982403	chr5	98981283	98982403	.	1121	3.13305	3.9649	0.000103818	0.00319116	0	17.6477	4.80972	3.10975	27.6586	18.1029	5.34961	30.5648	17.7069	0	15.7428	4.29056	2.77409	24.6732	16.1489	4.77218	27.2657	15.7956
chr1:88109969:88111403	chr1	88109969	88111403	.	1435	1.64335	5.14099	0.000105753	0.00323354	24.6048	51.5856	19.2389	17.1036	63.0617	22.3624	12.4824	54.9549	38.5385	17.1462	35.9481	13.4069	11.9189	43.9454	15.5835	8.69856	38.2961	26.8561
chr17:20601916:20602784	chr17	20601916	20602784	.	869	2.91262	3.96115	0.000107217	0.00327136	0.91129	24.4353	13.4672	4.66463	34.2967	14.9083	5.34961	26.2425	4.16632	1.04867	28.1188	15.4974	5.36781	39.4669	17.1557	6.15606	30.1985	4.79439
chr1:164717172:164718444	chr1	164717172	164718444	.	1273	5.61684	5.48722	1.46523e-14	4.69916e-11	0	96.3836	9.61944	1.55488	161.526	14.9083	5.34961	93.5468	10.9366	0	75.7137	7.55651	1.22143	126.886	11.7111	4.20237	73.4853	8.5912
chr5:125086039:125086849	chr5	125086039	125086849	.	811	1.36023	5.50385	0.000109518	0.00332051	22.7823	70.5908	32.7061	37.317	78.5505	29.8165	24.9649	71.0091	28.1227	28.0916	87.0417	40.3281	46.0136	96.8564	36.7651	30.7828	87.5575	34.6765
chr7:138425497:138426666	chr7	138425497	138426666	.	1170	2.5952	4.10849	0.000110584	0.00333531	8.20161	51.5856	3.84777	3.88719	35.4031	9.58388	6.24122	25.9338	2.08316	7.00992	44.0902	3.2887	3.32238	30.259	8.19135	5.33437	22.1656	1.78048
chr4:124402112:124402709	chr4	124402112	124402709	.	598	3.82739	4.20511	4.13512e-07	4.40429e-05	3.64516	25.7928	11.5433	0.777438	34.2967	13.8434	2.67481	40.7531	17.1861	6.09559	43.1318	19.3032	1.30006	57.3524	23.1495	4.47292	68.149	28.7393
chr5:88608737:88610173	chr5	88608737	88610173	.	1437	0.957555	6.84082	0.000113808	0.00340857	74.7258	160.187	115.433	109.619	177.015	88.3847	68.6534	156.838	68.7443	52.0012	111.473	80.3293	76.2831	123.184	61.5064	47.7755	109.142	47.8388
chr5:123969849:123970904	chr5	123969849	123970904	.	1056	1.54836	6.00131	2.34103e-06	0.000169778	29.1613	74.6633	72.1458	30.3201	106.209	46.8545	32.9893	89.5333	80.7225	27.6149	70.7039	68.3199	28.7122	100.577	44.3698	31.2399	84.7853	76.4418
chr4:31238285:31239515	chr4	31238285	31239515	.	1231	0.837779	7.43861	0.000118759	0.00352297	142.161	200.912	198.16	123.613	211.312	123.526	124.824	279.714	142.697	115.484	163.211	160.975	100.416	171.659	100.346	101.401	227.225	115.919
chr4:124753330:124754238	chr4	124753330	124754238	.	909	2.44357	4.34269	0.000118756	0.00352297	0.91129	39.3679	25.0105	5.44207	24.3396	17.038	10.6992	30.8735	16.6653	1.00252	43.3091	27.5143	5.98687	26.7762	18.7437	11.7703	33.9643	18.3337
chr6:154433031:154433807	chr6	154433031	154433807	.	777	3.47634	3.75478	0.000122091	0.00360331	0	24.4353	3.84777	6.2195	39.8284	2.12975	0.891602	21.9202	9.89502	0	31.4482	4.95209	8.00451	51.2593	2.74099	1.14749	28.2113	12.7349
chr4:72425780:72426414	chr4	72425780	72426414	.	635	2.32451	4.22456	0.000122624	0.00361534	8.20161	35.2954	2.88583	5.44207	45.3602	3.19463	9.80763	37.357	7.81186	12.9159	55.5833	4.54462	8.57018	71.4333	5.03091	15.4451	58.8299	12.3021
chr7:93251533:93252335	chr7	93251533	93252335	.	803	6.74825	3.06473	0.000449308	0.00975998	0	5.43006	13.4672	0	16.5952	8.51901	0	7.40965	10.9366	0	6.76222	16.7711	0	20.6665	10.609	0	9.22746	13.6197
chr16:56713528:56714431	chr16	56713528	56714431	.	904	1.13661	6.24525	0.000129178	0.00378538	63.7903	90.9535	51.9449	62.9725	131.655	69.2169	29.4229	120.098	49.4751	70.5645	100.612	57.4612	69.6598	145.636	76.5674	32.5474	132.852	54.7291
chr5:141474834:141475914	chr5	141474834	141475914	.	1081	2.54118	4.01568	0.000131243	0.00383033	3.64516	40.7255	7.69555	6.2195	23.2333	7.45413	6.24122	31.7997	6.24948	3.37203	37.6739	7.11892	5.75347	21.4924	6.89559	5.77356	29.417	5.78121
chr9:85894646:85897236	chr9	85894646	85897236	.	2591	1.84363	4.77907	0.000131816	0.0038393	7.29032	39.3679	20.2008	17.1036	60.849	23.4273	12.4824	35.1958	19.79	2.81371	15.1941	7.79653	6.60117	23.4848	9.04179	4.81761	13.5839	7.63799
chr14:71323699:71324011	chr14	71323699	71324011	.	313	5.94872	3.55273	2.64294e-06	0.000187435	0	32.5804	10.5814	0.777438	21.0206	4.2595	0	16.363	9.37423	0	104.091	33.8063	2.48383	67.1584	13.6086	0	52.2779	29.9496
chr4:77931635:77932353	chr4	77931635	77932353	.	719	3.38634	3.70073	0.000134299	0.00388029	5.46774	28.5078	5.77166	0.777438	32.084	11.7136	0.891602	16.0542	6.24948	7.60465	39.6493	8.02735	1.08128	44.6231	16.2916	1.24006	22.3286	8.69191
chr7:48577083:48577775	chr7	48577083	48577775	.	693	3.13972	3.71637	0.000140693	0.00403302	2.73387	17.6477	0.961944	3.88719	27.6586	2.12975	2.67481	37.9745	5.2079	3.94498	25.4657	1.38809	5.60922	39.9115	3.07323	3.85975	54.7972	7.51501
chr3:26350556:26351875	chr3	26350556	26351875	.	1320	2.15145	4.42169	0.000142882	0.00407926	8.20161	48.8706	8.65749	13.2164	25.4459	12.7785	4.45801	42.6055	15.1029	6.21334	37.0231	6.55871	10.0125	19.2772	9.68069	3.37728	32.2769	11.4416
chr20:1796880:1797755	chr20	1796880	1797755	.	876	3.07215	4.31477	1.05264e-05	0.000562658	0.91129	43.4405	20.2008	3.10975	38.7221	17.038	7.13282	16.363	22.9148	1.04029	49.5896	23.0603	3.54994	44.2033	19.4498	8.14249	18.6792	26.1584
chr14:69245214:69246096	chr14	69245214	69246096	.	883	1.78728	4.87357	0.000143796	0.00408517	18.2258	58.3732	22.1247	11.6616	24.3396	23.4273	10.6992	56.4986	24.4771	20.6408	66.1078	25.0563	13.2068	27.5647	26.5314	12.1169	63.9848	27.7204
chr4:92609050:92610114	chr4	92609050	92610114	.	1065	1.47077	5.33683	0.000144104	0.00408586	23.6935	44.798	30.7822	18.6585	50.8919	51.114	19.6153	72.8616	36.4553	22.2475	42.0639	28.9035	17.5197	47.7858	47.9944	18.4181	68.4146	34.2304
chr10:32702146:32703163	chr10	32702146	32703163	.	1018	0.955876	6.56498	0.000144771	0.00409273	70.1693	135.752	85.613	59.0853	127.23	107.552	65.9786	117.319	71.8691	68.9286	133.351	84.0992	58.0406	124.98	105.651	64.812	115.245	70.5983
chr21:36604470:36605751	chr21	36604470	36605751	.	1282	1.07119	6.61487	6.32634e-05	0.0021974	50.121	128.964	107.738	74.634	119.485	79.8657	48.1465	117.628	141.655	39.0959	100.596	84.0387	58.2169	93.2023	62.2977	37.5558	91.7537	110.495
chr16:79684948:79685651	chr16	79684948	79685651	.	704	3.53253	3.68299	0.000144666	0.00409273	6.37903	16.2902	0	1.55488	42.0411	0	0	34.2696	0	9.06112	23.1395	0	2.20863	59.7175	0	0	48.6785	0
chr5:153785723:153786245	chr5	153785723	153786245	.	523	2.97437	3.95105	0.000144732	0.00409273	4.55645	20.3627	14.4292	1.55488	38.7221	3.19463	3.56641	18.5241	21.3524	8.71214	38.9345	27.5892	2.97299	74.0384	6.10827	6.81914	35.419	40.8268
chr20:38428838:38429796	chr20	38428838	38429796	.	959	3.62677	3.6833	0.000146195	0.00411686	0	32.5804	6.7336	5.44207	23.2333	10.6488	0	19.4503	6.77027	0	33.9733	7.02149	5.67473	24.2265	11.104	0	20.2819	7.05972
chr8:19041514:19042176	chr8	19041514	19042176	.	663	2.26845	4.2298	0.00014634	0.00411692	8.20161	46.1555	3.84777	6.2195	36.5094	1.06488	10.6992	39.2094	4.68711	12.3705	69.6162	5.80358	9.38085	55.067	1.60615	16.1376	59.1394	7.06955
chr17:29654713:29655361	chr17	29654713	29655361	.	649	3.13821	4.06471	2.77375e-05	0.00118962	1.82258	27.1503	12.5053	4.66463	27.6586	30.8814	1.7832	22.2289	10.9366	2.80829	41.8341	19.2685	7.18741	42.6173	47.5831	2.74762	34.2511	16.8515
chr4:157700662:157701402	chr4	157700662	157701402	.	741	1.49176	5.24807	0.00015283	0.00427035	26.4274	69.2333	32.7061	17.8811	45.3602	35.1409	16.0488	55.8811	31.2474	35.6645	93.4322	44.1378	24.131	61.2148	47.4236	21.6584	75.4131	42.1693
chrX:69473375:69474538	chrX	69473375	69474538	.	1164	1.19275	6.07268	0.000154332	0.00430816	34.629	139.824	21.1628	59.0853	102.89	52.1789	55.2794	101.883	28.1227	29.75	120.124	18.1811	50.7606	88.3936	44.8273	47.4909	87.5281	24.1604
chr17:20370541:20371368	chr17	20370541	20371368	.	828	2.85866	3.98335	0.000154778	0.00431228	1.82258	9.50261	7.69555	2.33231	51.9982	11.7136	8.02442	27.4775	8.33265	2.20118	11.4766	9.29414	2.8168	62.7998	14.1469	9.69133	33.1853	10.0636
chr3:30323614:30324661	chr3	30323614	30324661	.	1048	0.801304	7.68923	9.62784e-05	0.00301081	122.113	253.855	202.008	160.93	268.842	214.04	136.415	213.027	273.415	116.52	242.228	192.756	153.559	256.529	204.237	130.167	203.27	260.892
chr1:48337397:48338015	chr1	48337397	48338015	.	619	2.58612	4.81974	7.99437e-07	7.51256e-05	6.37903	51.5856	28.8583	9.32925	30.9777	23.4273	7.13282	55.5724	26.5603	10.3054	83.337	46.6208	15.0715	50.0447	37.847	11.5231	89.7777	42.9084
chr1:41969551:41970670	chr1	41969551	41970670	.	1120	1.43273	5.65041	0.000158385	0.00438735	9.1129	66.5183	44.2494	38.8719	70.8061	34.076	34.7725	86.1372	52.5998	8.13652	59.3913	39.5084	34.707	63.2197	30.425	31.0469	76.9082	46.9641
chr8:98102050:98103696	chr8	98102050	98103696	.	1647	1.63169	5.44288	0.000158558	0.00438795	24.6048	92.311	1.92389	31.0975	94.0394	30.8814	25.8565	69.7742	10.9366	14.9392	56.048	1.16812	18.8813	57.0974	18.7501	15.6991	42.3644	6.64031
chr2:28872184:28873539	chr2	28872184	28873539	.	1356	1.01269	6.56523	0.000159703	0.00441147	43.7419	130.321	78.8794	63.7499	164.845	80.9306	93.6183	113.923	70.8275	32.2581	96.1073	58.1706	47.0132	121.567	59.6833	69.04	84.0143	52.2327
chrY:13467831:13468314	chrY	13467831	13468314	.	484	0.780221	7.65735	0.000159867	0.00441147	160.387	264.715	179.883	110.396	241.183	189.548	189.02	280.64	188.005	331.378	546.933	371.66	228.091	498.313	391.628	390.537	579.836	388.441
chr12:47280277:47281026	chr12	47280277	47281026	.	750	3.23468	4.05487	0.000160966	0.00443332	0	13.5752	6.7336	0	43.1475	17.038	8.91602	27.1687	18.7485	0	18.1002	8.97814	0	57.53	22.7174	11.888	36.225	24.9979
chr10:119564259:119564753	chr10	119564259	119564753	.	495	3.5896	3.56708	0.00016122	0.0044361	1.82258	21.7202	1.92389	3.88719	39.8284	2.12975	0.891602	22.8464	0	3.68198	43.8793	3.88664	7.85291	80.4615	4.30253	1.80122	46.1544	0
chr4:78093477:78094227	chr4	78093477	78094227	.	751	3.86747	3.64582	0.00016193	0.00444715	0	13.5752	4.80972	3.88719	35.4031	7.45413	0	15.7455	18.2277	0	18.0761	6.40442	5.17602	47.1412	9.92561	0	20.9661	24.2712
chr3:184457934:184459801	chr3	184457934	184459801	.	1868	1.68844	5.30888	0.000171561	0.00468489	4.55645	67.8758	53.8688	20.9908	32.084	31.9463	25.8565	66.0694	39.5801	2.43921	36.3361	28.8377	11.2371	17.1756	17.1019	13.8418	35.369	21.1885
chr19:2817165:2818764	chr19	2817165	2818764	.	1600	1.58456	7.44217	5.70255e-10	1.9595e-07	106.621	274.218	120.243	73.0792	284.331	158.667	92.7267	258.412	184.36	66.6381	171.386	75.1518	45.6745	177.707	99.1666	57.9542	161.507	115.225
chr14:94425237:94426919	chr14	94425237	94426919	.	1683	0.851697	7.65008	5.58976e-05	0.00200925	113.911	219.917	231.828	129.055	213.525	254.505	158.705	286.198	186.443	67.6835	130.67	137.747	76.6813	126.871	151.221	94.299	170.052	110.78
chr2:54714764:54715817	chr2	54714764	54715817	.	1054	1.44897	5.44212	0.000177308	0.0048145	10.0242	55.6581	44.2494	27.9878	51.9982	38.3355	26.7481	68.848	52.5998	9.51062	52.8066	41.9824	26.5539	49.3342	36.3715	25.3777	65.3207	49.905
chr22:36940541:36941040	chr22	36940541	36941040	.	500	7.70358	2.97662	0.000178661	0.00484214	0	28.5078	0	0	12.1698	0	0	16.6717	1.56237	0	57.0156	0	0	24.3396	0	0	33.3434	3.12474
chr10:79323973:79325190	chr10	79323973	79325190	.	1218	2.60416	4.2706	0.000183403	0.00494279	0	43.4405	15.3911	11.6616	26.5523	10.6488	3.56641	28.0949	21.8732	0	35.6654	12.6364	9.57436	21.7999	8.74282	2.92809	23.0664	17.9583
chr3:62856071:62856483	chr3	62856071	62856483	.	413	3.18362	3.77212	0.000183918	0.00495205	1.82258	19.0052	7.69555	5.44207	24.3396	10.6488	0	26.5512	12.499	4.41303	46.0175	18.6333	13.1769	58.9337	25.7839	0	64.2887	30.2638
chr1:155214719:155215227	chr1	155214719	155215227	.	509	4.06617	3.43436	0.000186095	0.00498852	0	21.7202	7.69555	0.777438	23.2333	9.58388	2.67481	17.2892	3.12474	0	42.6724	15.119	1.52738	45.6449	18.8288	5.25502	33.967	6.13898
chr8:105192757:105193157	chr8	105192757	105193157	.	401	2.51077	4.46314	0.000111007	0.00334458	11.8468	29.8653	16.353	1.55488	14.3825	34.076	2.67481	44.1492	27.6019	29.5431	74.4772	40.7806	3.8775	35.8666	84.9776	6.67034	110.098	68.8326
chr11:4913190:4913720	chr11	4913190	4913720	.	531	2.34711	4.46199	0.000190236	0.00507483	2.73387	43.4405	17.315	13.2164	59.7427	1.06488	8.91602	28.0949	13.5405	5.14853	81.8088	32.6083	24.8897	112.51	2.00542	16.791	52.9095	25.5001
chr3:45676840:45677702	chr3	45676840	45677702	.	863	2.91369	3.9664	0.00019236	0.00512676	3.64516	35.2954	7.69555	7.77438	33.1904	15.9731	0	22.5377	4.68711	4.22382	40.8985	8.91721	9.00855	38.4593	18.5089	0	26.1155	5.43119
chr6:45536795:45537678	chr6	45536795	45537678	.	884	3.96436	3.5226	0.000192662	0.00513007	0	19.0052	2.88583	3.88719	27.6586	11.7136	0	21.9202	3.64553	0	21.4991	3.26451	4.39727	31.2881	13.2507	0	24.7966	4.12391
chr7:121646369:121647116	chr7	121646369	121647116	.	748	4.75205	3.4247	0.000197353	0.00523565	0	5.43006	1.92389	0	19.9142	3.19463	1.7832	26.86	17.7069	0	7.25944	2.57204	0	26.6233	4.27089	2.38396	35.9091	23.6723
chr18:74792592:74793400	chr18	74792592	74793400	.	809	1.93376	4.5756	0.000198263	0.00525311	16.4032	46.1555	14.4292	6.99694	58.6363	8.51901	11.5908	30.5648	11.4574	20.2759	57.0526	17.8358	8.64888	72.48	10.5303	14.3274	37.781	14.1624
chr2:238110137:238111445	chr2	238110137	238111445	.	1309	0.976004	6.4278	0.000198375	0.00525311	61.9677	114.031	64.4502	50.5335	132.761	94.774	63.3038	100.956	80.2017	47.3397	87.1133	49.2362	38.6046	101.422	72.4018	48.3604	77.1249	61.2695
chr3:41549550:41550252	chr3	41549550	41550252	.	703	4.23382	4.11014	4.17325e-07	4.42855e-05	0.91129	42.083	20.2008	1.55488	42.0411	11.7136	2.67481	19.4503	6.77027	1.29629	59.862	28.7352	2.21177	59.8025	16.6624	3.80485	27.6676	9.63055
chr2:8295056:8295707	chr2	8295056	8295707	.	652	3.00863	3.85009	0.000200285	0.00529399	9.1129	32.5804	1.92389	3.10975	23.2333	1.06488	0	42.6055	0.52079	13.9768	49.9699	2.95075	4.76956	35.6338	1.63325	0	65.3458	0.798758
chr2:197157976:197160037	chr2	197157976	197160037	.	2062	1.12488	6.11342	0.000203325	0.00534497	56.5	82.8084	69.2599	42.7591	129.442	55.3735	32.0977	76.8751	66.1404	27.4006	40.1593	33.5887	20.7367	62.7752	26.8543	15.5663	37.2818	32.0758
chr9:75794170:75795423	chr9	75794170	75795423	.	1254	1.82103	5.75271	5.71693e-07	5.85114e-05	19.1371	67.8758	57.7166	17.8811	94.0394	55.3735	32.0977	81.5061	46.8711	15.2608	54.1274	46.026	14.2592	74.9915	44.1575	25.5962	64.9969	37.3773
chr17:67866328:67866893	chr17	67866328	67866893	.	566	2.02199	4.9613	2.51392e-05	0.00109734	7.29032	42.083	35.5919	12.439	30.9777	45.7897	12.4824	56.8073	22.9148	12.8804	74.3515	62.8832	21.977	54.7309	80.9005	22.0538	100.366	40.4855
chr2:177447446:177448530	chr2	177447446	177448530	.	1085	1.21013	5.97211	0.000208559	0.00544783	22.7823	74.6633	67.336	43.5365	99.5711	40.4653	41.9053	78.1101	82.8057	20.9975	68.8141	62.0609	40.1258	91.7706	37.2952	38.6224	71.9908	76.3186
chr4:53704062:53704939	chr4	53704062	53704939	.	878	2.96403	3.76328	0.00021114	0.00550528	4.55645	21.7202	5.77166	1.55488	22.1269	11.7136	2.67481	25.3163	12.499	5.18958	24.7383	6.57365	1.77093	25.2015	13.3413	3.04648	28.8341	14.2357
chr2:13792621:13793610	chr2	13792621	13793610	.	990	3.07588	3.8152	0.000212167	0.00552707	7.29032	28.5078	5.77166	2.33231	33.1904	10.6488	0	21.3027	6.77027	7.36396	28.7958	5.82996	2.35587	33.5256	10.7563	0	21.5179	6.83866
chr8:18918238:18919279	chr8	18918238	18919279	.	1042	1.44785	5.27953	0.000213636	0.00556032	20.9597	59.7307	36.5539	30.3201	58.6363	25.557	13.374	59.5859	31.7682	20.1148	57.3231	35.0805	29.098	56.2729	24.5269	12.835	57.1842	30.4877
chr7:41044911:41045602	chr7	41044911	41045602	.	692	4.09531	3.75894	8.68054e-05	0.00280263	0.91129	28.5078	3.84777	2.33231	19.9142	38.3355	0	14.8193	4.68711	1.31689	41.1963	5.56037	3.3704	28.7778	55.3982	0	21.4152	6.77328
chr5:72617346:72618106	chr5	72617346	72618106	.	761	1.23195	5.83112	0.000215483	0.00559327	22.7823	103.171	47.1352	45.0914	59.7427	66.0223	33.8809	79.0363	43.7464	29.9373	135.573	61.9385	59.2528	78.5055	86.7573	44.5215	103.858	57.4854
chr5:88002802:88004026	chr5	88002802	88004026	.	1225	2.30905	4.45001	0.000216215	0.00560721	0.91129	38.0104	19.2389	16.3262	36.5094	24.4921	3.56641	33.3434	12.499	0.74391	31.0289	15.7052	13.3275	29.8036	19.9936	2.91135	27.2191	10.2032
chr4:115304439:115305359	chr4	115304439	115305359	.	921	6.96896	3.0908	0.000265504	0.00651295	0	14.9327	8.65749	0	4.42538	14.9083	0	14.5106	5.72869	0	16.2135	9.4001	0	4.80498	16.187	0	15.7552	6.22008
chr2:122262565:122262956	chr2	122262565	122262956	.	392	4.34951	3.3517	0.000321776	0.00753875	0.91129	8.14509	12.5053	0.777438	19.9142	14.9083	0	12.0407	9.89502	2.32472	20.7783	31.9012	1.98326	50.8016	38.0313	0	30.716	25.2424
chr1:91565201:91565808	chr1	91565201	91565808	.	608	4.75954	4.03609	1.56388e-07	2.01014e-05	2.73387	28.5078	9.61944	0.777438	34.2967	7.45413	0	37.0482	12.499	4.4965	46.8879	15.8214	1.27868	56.4091	12.2601	0	60.9346	20.5575
chr16:10174143:10174701	chr16	10174143	10174701	.	559	2.40451	4.22932	0.000217334	0.00562613	6.37903	23.0778	6.7336	8.55182	46.4665	3.19463	4.45801	34.5784	20.3108	11.4115	41.284	12.0458	15.2984	83.1244	5.7149	7.97498	61.8575	36.3342
chr2:52310000:52311091	chr2	52310000	52311091	.	1092	1.58426	5.4956	0.000420401	0.00927002	5.46774	57.0156	52.9069	10.1067	70.8061	43.6599	41.0137	43.8404	68.7443	5.00709	52.2121	48.4495	9.25521	64.8408	39.9816	37.5583	40.1469	62.9527
chr20:46193372:46194717	chr20	46193372	46194717	.	1346	1.27435	5.84105	0.000222571	0.00572066	64.7016	85.5235	26.9344	23.3231	89.614	48.9843	28.5313	103.426	31.7682	48.0695	63.539	20.0107	17.3277	66.578	36.3925	21.1971	76.8398	23.6019
chr17:66230804:66231641	chr17	66230804	66231641	.	838	1.59176	5.11512	0.000223947	0.00575088	17.3145	32.5804	44.2494	16.3262	73.0188	26.6219	14.2656	40.1356	34.893	20.6617	38.8787	52.8036	19.4823	87.1346	31.7684	17.0234	47.8945	41.6384
chr2:12956126:12957291	chr2	12956126	12957291	.	1166	1.01456	6.34051	0.000225327	0.00577605	41.0081	109.959	65.4122	47.4237	95.1457	97.9686	67.7618	109.91	81.7641	35.1699	94.3042	56.0996	40.6721	81.6001	84.0211	58.1147	94.2623	70.1236
chr11:85526207:85527634	chr11	85526207	85527634	.	1428	1.71537	4.87865	0.000225704	0.00578058	20.9597	28.5078	19.2389	11.6616	50.8919	22.3624	9.80763	57.4248	28.1227	14.6776	19.9635	13.4726	8.16636	35.6386	15.6599	6.86809	40.2134	19.6938
chr5:67520604:67521203	chr5	67520604	67521203	.	600	2.36233	4.07262	0.000230168	0.00587213	4.55645	38.0104	5.77166	10.1067	35.4031	2.12975	5.34961	32.1085	5.72869	7.59408	63.3507	9.61944	16.8445	59.0051	3.54959	8.91602	53.5141	9.54782
chr4:23335135:23335647	chr4	23335135	23335647	.	513	7.6579	2.94608	0.000231488	0.00588692	0	14.9327	0	0	21.0206	0	0	19.1416	0	0	29.1085	0	0	40.9758	0	0	37.3131	0
chr14:69252419:69253878	chr14	69252419	69253878	.	1460	1.93979	5.49378	1.32384e-06	0.000110147	22.7823	73.3058	28.8583	15.5488	73.0188	52.1789	15.1572	60.5121	52.079	15.6043	50.2095	19.766	10.6498	50.0129	35.739	10.3817	41.4467	35.6706
chr2:35728620:35729558	chr2	35728620	35729558	.	939	4.23368	4.27742	8.39657e-08	1.23025e-05	3.64516	32.5804	14.4292	2.33231	42.0411	10.6488	0	42.2968	12.499	3.88196	34.6969	15.3665	2.48383	44.7722	11.3405	0	45.0445	13.3109
chr17:39287747:39288973	chr17	39287747	39288973	.	1227	1.14836	5.81618	0.000239653	0.00606254	35.5403	77.3784	51.9449	36.5396	82.9759	57.5033	28.5313	65.1432	59.3701	28.9652	63.0631	42.3349	29.7796	67.625	46.865	23.2529	53.0914	48.3864
chr14:98178981:98180166	chr14	98178981	98180166	.	1186	1.27012	5.65432	0.000243072	0.00610619	31.8952	71.9483	26.9344	34.9847	80.7632	34.076	41.0137	104.661	13.0198	26.893	60.6647	22.7103	29.4981	68.0972	28.7319	34.5815	88.2473	10.9779
chr12:115211541:115212285	chr12	115211541	115212285	.	745	7.77664	3.34385	8.79494e-06	0.000494848	0	24.4353	1.92389	0	21.0206	3.19463	0	15.128	13.0198	0	32.799	2.5824	0	28.2155	4.28809	0	20.3061	17.4762
chr18:46089147:46090080	chr18	46089147	46090080	.	934	2.06314	4.47142	0.000242593	0.00610619	9.1129	25.7928	12.5053	9.32925	42.0411	30.8814	4.45801	29.3299	23.4356	9.75685	27.6154	13.3889	9.9885	45.0119	33.0636	4.77303	31.4024	25.0916
chr4:171169445:171170226	chr4	171169445	171170226	.	782	2.85949	3.82134	0.000242905	0.00610619	3.64516	17.6477	4.80972	3.10975	58.6363	4.2595	5.34961	14.2018	6.24948	4.66133	22.5674	6.15053	3.97666	74.9825	5.44694	6.84094	18.1609	7.99167
chr17:27434916:27435542	chr17	27434916	27435542	.	627	2.69791	4.15034	0.00024566	0.00616584	0	28.5078	3.84777	6.99694	28.765	5.32438	8.02442	41.6793	19.79	0	45.467	6.1368	11.1594	45.8772	8.49183	12.7981	66.4741	31.5631
chr3:35974557:35975008	chr3	35974557	35975008	.	452	1.973	4.66894	0.000252607	0.00630731	5.46774	25.7928	22.1247	19.4359	45.3602	26.6219	3.56641	42.6055	23.4356	12.0968	57.0637	48.9485	42.9999	100.354	58.898	7.89029	94.2599	51.8486
chr4:157745502:157746453	chr4	157745502	157746453	.	952	1.55222	5.07576	0.000252555	0.00630731	12.7581	71.9483	28.8583	18.6585	35.4031	27.6868	22.2901	51.8675	22.394	13.4013	75.576	30.3133	19.5993	37.1881	29.0827	23.4139	54.4827	23.5231
chr3:16144146:16145209	chr3	16144146	16145209	.	1064	1.06059	6.33888	0.000253081	0.00631368	52.8548	138.467	50.983	39.6493	115.06	68.1521	69.545	88.6071	93.7423	49.6756	130.138	47.9164	37.2644	108.139	64.0527	65.3618	83.2773	88.1036
chr4:177366078:177366449	chr4	177366078	177366449	.	372	3.44037	3.69574	0.000254548	0.00633165	5.46774	21.7202	3.84777	0.777438	28.765	18.1029	0	18.8329	7.81186	14.6982	58.3878	10.3435	2.08989	77.3252	48.6637	0	50.626	20.9996
chr5:88401540:88402295	chr5	88401540	88402295	.	756	4.36803	3.34831	0.000254679	0.00633165	0	16.2902	8.65749	2.33231	26.5523	3.19463	0	14.5106	7.81186	0	21.5479	11.4517	3.08507	35.1221	4.2257	0	19.1939	10.3331
chr13:73212228:73213054	chr13	73212228	73213054	.	827	4.24896	3.4033	0.00025616	0.00636301	1.82258	12.2176	1.92389	0.777438	18.8079	5.32438	0	22.2289	15.1029	2.20385	14.7734	2.32634	0.94007	22.7423	6.43819	0	26.879	18.2623
chr5:150994905:150995561	chr5	150994905	150995561	.	657	2.57679	4.13069	0.000261234	0.00646244	3.64516	27.1503	5.77166	2.33231	38.7221	28.7516	8.91602	24.0814	7.81186	5.54819	41.3247	8.78487	3.54994	58.9377	43.762	13.5708	36.6535	11.8902
chr3:41012839:41013555	chr3	41012839	41013555	.	717	1.73194	4.7645	0.000261726	0.00646785	9.1129	36.6529	9.61944	14.7713	56.4236	10.6488	20.5069	54.0287	18.2277	12.7098	51.1198	13.4162	20.6016	78.694	14.8518	28.6009	75.3538	25.4221
chr1:48041688:48042562	chr1	48041688	48042562	.	875	4.55042	4.46289	6.49618e-09	1.57568e-06	0	51.5856	7.69555	3.88719	39.8284	10.6488	1.7832	52.7938	16.1445	0	58.955	8.79491	4.4425	45.5182	12.17	2.03795	60.3357	18.4509
chr10:4569547:4570110	chr10	4569547	4570110	.	564	3.09303	3.87556	0.000262423	0.00647094	8.20161	23.0778	11.5433	0.777438	38.7221	10.6488	0	16.0542	12.499	14.5419	40.918	20.4669	1.37844	68.6562	18.8808	0	28.465	22.1613
chr12:26392430:26393188	chr12	26392430	26393188	.	759	5.2884	3.29767	0.000129456	0.00378942	0.91129	13.5752	15.3911	0	21.0206	6.38926	0	10.1883	9.37423	1.20065	17.8856	20.2781	0	27.6951	8.41799	0	13.4233	12.3508
chr6:105766627:105767809	chr6	105766627	105767809	.	1183	1.3367	5.44603	0.000313025	0.00738165	18.2258	55.6581	55.7927	27.9878	57.53	39.4004	16.9404	48.7802	58.8493	15.4064	47.0483	47.1621	23.6583	48.6306	33.3055	14.3199	41.2343	49.7458
chr10:74019781:74020652	chr10	74019781	74020652	.	872	1.457	5.20345	0.00034169	0.00788741	11.8468	55.6581	41.3636	17.8811	38.7221	54.3087	19.6153	42.9142	37.4969	13.5857	63.8281	47.4353	20.5058	44.4061	62.2806	22.4946	49.2136	43.001
chr2:196228098:196229667	chr2	196228098	196229667	.	1570	1.66973	5.01022	0.000265581	0.00651295	17.3145	46.1555	25.9725	20.9908	57.53	30.8814	5.34961	38.2832	35.4137	11.0284	29.3984	16.543	13.37	36.6433	19.6697	3.4074	24.3842	22.5565
chr3:36413619:36415168	chr3	36413619	36415168	.	1550	1.82978	6.5109	3.95194e-09	1.01847e-06	45.5645	153.399	111.585	34.2073	149.357	66.0223	44.5801	139.857	64.578	29.3965	98.9672	71.9906	22.0692	96.3591	42.595	28.7614	90.2304	41.6632
chr6:99081562:99082228	chr6	99081562	99082228	.	667	2.7583	4.03568	0.000267361	0.00653992	0	23.0778	5.77166	3.10975	23.2333	9.58388	9.80763	40.7531	15.1029	0	34.5993	8.65317	4.6623	34.8325	14.3686	14.7041	61.0991	22.6431
chr10:93364902:93365806	chr10	93364902	93365806	.	905	1.90874	4.50514	0.000268593	0.00655652	10.0242	32.5804	9.61944	7.77438	48.6792	18.1029	14.2656	39.2094	11.4574	11.0765	36.0004	10.6292	8.59047	53.7892	20.0032	15.7631	43.3253	12.6601
chr12:96229359:96230525	chr12	96229359	96230525	.	1167	1.5526	5.01175	0.000268721	0.00655652	13.6694	48.8706	17.315	18.6585	65.2744	28.7516	20.5069	42.9142	22.9148	11.7132	41.8771	14.8372	15.9884	55.9335	24.6372	17.5723	36.7731	19.6356
chr1:164741637:164742574	chr1	164741637	164742574	.	938	1.51434	5.42558	0.000269437	0.00656169	22.7823	57.0156	3.84777	37.317	61.9554	24.4921	24.0733	117.319	20.3108	24.2881	60.7843	4.1021	39.7836	66.0505	26.111	25.6645	125.074	21.6533
chr10:73932937:73934338	chr10	73932937	73934338	.	1402	0.969309	6.38645	0.00027118	0.00659422	46.4758	97.7411	93.3085	56.753	89.614	71.3467	61.5206	131.213	90.0967	33.1496	69.7155	66.5539	40.48	63.9187	50.8892	43.8806	93.5895	64.263
chr8:53809756:53810903	chr8	53809756	53810903	.	1148	2.03812	7.33235	6.49982e-13	9.38054e-10	58.3226	328.519	126.977	85.5182	281.012	126.72	65.9786	259.338	107.283	50.8036	286.166	110.607	74.4932	244.784	110.383	57.4726	225.904	93.4519
chr13:46074431:46075775	chr13	46074431	46075775	.	1345	0.820873	7.15325	0.000278744	0.00673277	103.887	213.13	172.188	98.7346	167.058	146.953	102.534	162.395	103.116	77.2395	158.461	128.021	73.4086	124.207	109.259	76.2337	120.74	76.6665
chr8:121825202:121826006	chr8	121825202	121826006	.	805	1.38516	5.46153	0.000282067	0.0067903	30.9839	61.0882	42.3255	25.6555	39.8284	46.8545	12.4824	77.1839	45.3088	38.4893	75.886	52.5783	31.8701	49.4763	58.2044	15.5061	95.8806	56.2842
chr14:50459312:50460149	chr14	50459312	50460149	.	838	2.34261	4.51278	6.53776e-05	0.0022465	4.55645	21.7202	10.5814	6.2195	34.2967	36.2058	8.02442	38.9007	29.6851	5.43729	25.9191	12.6269	7.42184	40.9269	43.205	9.57568	46.4208	35.4237
chr10:117414154:117414782	chr10	117414154	117414782	.	629	2.45001	4.03867	0.000282908	0.00680488	7.29032	24.4353	11.5433	1.55488	33.1904	8.51901	7.13282	29.3299	11.4574	11.5903	38.8478	18.3519	2.47198	52.7669	13.5437	11.3399	46.6294	18.2152
chr20:58824084:58824934	chr20	58824084	58824934	.	851	3.10951	3.70932	0.000284164	0.00682939	0	25.7928	7.69555	4.66463	28.765	3.19463	4.45801	27.4775	2.60395	0	30.3088	9.04295	5.48135	33.8014	3.75397	5.23856	32.2884	3.05987
chr2:202719054:202719949	chr2	202719054	202719949	.	896	1.51364	5.22704	0.000288377	0.00691815	20.0484	71.9483	46.1733	10.8841	49.7856	29.8165	26.7481	44.7666	26.5603	22.3754	80.2995	51.5327	12.1475	55.5642	33.2774	29.8528	49.9628	29.6432
chr5:127563454:127564174	chr5	127563454	127564174	.	721	1.88363	4.70665	0.000288576	0.00691815	6.37903	39.3679	18.2769	21.7683	35.4031	25.557	4.45801	47.5453	21.8732	8.84748	54.6019	25.3494	30.1918	49.1027	35.4466	6.1831	65.9435	30.3373
chr8:29259874:29260423	chr8	29259874	29260423	.	550	7.52543	2.98299	0.000292173	0.00699276	0	12.2176	0.961944	0	17.7015	5.32438	0	20.0678	0	0	22.2139	1.74899	0	32.1846	9.68069	0	36.4869	0
chr5:52039936:52041031	chr5	52039936	52041031	.	1096	3.25926	3.56434	0.00029417	0.00703474	1.82258	35.2954	5.77166	1.55488	18.8079	2.12975	4.45801	23.1552	2.08316	1.66294	32.2038	5.26611	1.41868	17.1605	1.9432	4.06753	21.127	1.90069
chr11:69047979:69048994	chr11	69047979	69048994	.	1016	1.86816	4.52483	0.000296487	0.00706673	10.0242	32.5804	17.315	9.32925	45.3602	23.4273	9.80763	29.9473	17.7069	9.86633	32.0673	17.0423	9.18234	44.6458	23.0583	9.65318	29.4757	17.428
chr5:5598518:5599532	chr5	5598518	5599532	.	1015	1.23126	5.59568	0.000296454	0.00706673	35.5403	70.5908	31.7441	38.8719	59.7427	31.9463	23.1817	96.3254	32.289	35.0151	69.5476	31.275	38.2974	58.8598	31.4742	22.8391	94.9019	31.8118
chr9:33230933:33231722	chr9	33230933	33231722	.	790	3.07551	3.82584	0.000299894	0.00713025	1.82258	24.4353	24.0486	5.44207	17.7015	11.7136	0	23.1552	6.77027	2.30706	30.9307	30.4413	6.88869	22.407	14.8274	0	29.3103	8.56997
chr8:113457668:113458062	chr8	113457668	113458062	.	395	4.51312	3.26655	0.00031014	0.00733161	2.73387	23.0778	0.961944	0	23.2333	1.06488	0	19.7591	3.12474	6.92119	58.4247	2.4353	0	58.8184	2.69589	0	50.023	7.91074
chr12:12162056:12162775	chr12	12162056	12162775	.	720	3.98987	3.65222	6.61744e-05	0.0022631	0	13.5752	22.1247	2.33231	23.2333	10.6488	0.891602	20.3765	6.77027	0	18.8544	30.7288	3.23932	32.2684	14.7899	1.23834	28.3007	9.40316
chr11:123089074:123089635	chr11	123089074	123089635	.	562	3.98505	3.42512	0.000313801	0.00739393	0.91129	21.7202	6.7336	3.10975	24.3396	0	0	24.0814	2.08316	1.62151	38.6481	11.9815	5.53337	43.3089	0	0	42.8494	3.70669
chr6:43977770:43979238	chr6	43977770	43979238	.	1469	1.28359	5.56269	0.000314884	0.007412	20.9597	61.0882	35.5919	39.6493	58.6363	40.4653	21.3985	79.345	53.1206	14.268	41.5849	24.2287	26.9907	39.9158	27.5461	14.5667	54.0129	36.1611
chr8:113475225:113476209	chr8	113475225	113476209	.	985	3.00247	3.84099	0.000210957	0.00550528	0	40.7255	0	4.66463	32.084	0	8.02442	31.7997	0	0	41.3456	0	4.73566	32.5726	0	8.14662	32.284	0
chr16:75353679:75354220	chr16	75353679	75354220	.	542	3.99757	3.99916	2.68017e-06	0.000189145	3.64516	31.2229	10.5814	1.55488	21.0206	10.6488	0	33.6522	16.6653	6.72539	57.6067	19.5228	2.86877	38.7833	19.6472	0	62.0889	30.7478
chr12:116034799:116035524	chr12	116034799	116035524	.	726	1.90016	4.48491	0.000324758	0.00759628	12.7581	20.3627	6.7336	10.8841	54.2109	8.51901	11.5908	55.2636	5.2079	17.5731	28.0478	9.27494	14.9919	74.6707	11.7342	15.9653	76.1207	7.17342
chr10:101769320:101769942	chr10	101769320	101769942	.	623	2.09982	4.52507	0.000329245	0.00767636	7.29032	43.4405	26.9344	10.8841	32.084	5.32438	5.34961	28.4037	34.3722	11.702	69.7279	43.2334	17.4705	51.4992	8.54636	8.58686	45.5917	55.172
chr10:54643638:54644242	chr10	54643638	54644242	.	605	5.69857	3.07872	0.000329755	0.00768204	0	23.0778	0	0	14.3825	0	0.891602	21.3027	2.08316	0	38.1451	0	0	23.7727	0	1.47372	35.2111	3.44324
chr9:119311029:119312671	chr9	119311029	119312671	.	1643	0.99208	6.11873	0.000334527	0.00776813	49.2097	103.171	47.1352	57.5304	106.209	53.2438	51.7129	106.205	38.5385	29.9511	62.7944	28.6885	35.0155	64.6434	32.4064	31.4747	64.6409	23.4562
chr8:23017467:23017828	chr8	23017467	23017828	.	362	3.55111	3.65293	0.000236521	0.00599906	0	17.6477	6.7336	3.10975	21.0206	13.8434	0.891602	13.8931	22.394	0	48.7506	18.6011	8.59047	58.0679	38.2414	2.46299	38.3787	61.8618
chr15:87167726:87168462	chr15	87167726	87168462	.	737	6.92269	3.07325	0.000420934	0.00927015	0	2.71503	5.77166	0	21.0206	19.1678	0	9.26206	5.72869	0	3.6839	7.83129	0	28.5218	26.0078	0	12.5672	7.77299
chr3:36566273:36567148	chr3	36566273	36567148	.	876	3.45756	4.10227	1.93943e-05	0.000905821	0.91129	46.1555	13.4672	6.2195	21.0206	18.1029	0	19.7591	18.7485	1.04029	52.689	15.3735	7.09989	23.9961	20.6654	0	22.556	21.4023
chr6:123411914:123412885	chr6	123411914	123412885	.	972	1.99644	4.4174	0.000354251	0.00810873	9.1129	66.5183	5.77166	17.1036	36.5094	3.19463	6.24122	30.8735	7.81186	9.37541	68.4344	5.93792	17.5963	37.5611	3.28665	6.42101	31.7629	8.03689
chr1:182259097:182259712	chr1	182259097	182259712	.	616	1.95083	4.47992	0.000360472	0.00819645	6.37903	31.2229	9.61944	8.55182	42.0411	22.3624	11.5908	30.5648	25.5187	10.3556	50.6864	15.616	13.8828	68.2486	36.3026	18.8163	49.6182	41.4265
chr6:81914392:81914823	chr6	81914392	81914823	.	432	7.0664	3.09355	0.000242277	0.00610619	0	4.07255	6.7336	0	24.3396	7.45413	0	8.33586	12.499	0	9.42719	15.587	0	56.3417	17.2549	0	19.296	28.9328
chr5:149695868:149697764	chr5	149695868	149697764	.	1897	0.859567	6.89245	0.000366034	0.00830597	104.798	115.389	101.004	81.631	207.993	99.0335	92.7267	179.375	73.9522	55.2443	60.827	53.2441	43.0316	109.643	52.2053	48.8807	94.5573	38.9838
chr10:48257379:48258296	chr10	48257379	48258296	.	918	1.46482	5.13622	0.000372452	0.00843173	17.3145	67.8758	25.9725	25.6555	36.5094	34.076	14.2656	55.2636	27.0811	18.8611	73.9387	28.2925	27.9471	39.7706	37.1199	15.5399	60.2	29.5001
chr1:156095700:156098245	chr1	156095700	156098245	.	2546	0.773807	7.41828	0.000374168	0.00846395	129.403	165.617	213.551	112.728	269.948	161.861	127.499	196.356	149.988	50.8261	65.0498	83.8772	44.2767	106.028	63.5747	50.0782	77.1232	58.9111
chr1:64577657:64578298	chr1	64577657	64578298	.	642	1.88172	4.73639	0.00023741	0.00601634	7.29032	31.2229	29.8202	13.2164	24.3396	46.8545	7.13282	45.6928	20.3108	11.3556	48.6337	46.449	20.5864	37.9122	72.9821	11.1103	71.1726	31.6368
chr2:75750018:75751367	chr2	75750018	75751367	.	1350	0.850945	6.67838	0.000377086	0.00852327	83.8387	127.606	62.5263	97.1797	193.61	56.4384	82.919	154.985	49.9959	62.1027	94.5233	46.3158	71.985	143.415	41.8062	61.4215	114.804	37.034
chr7:103375594:103376343	chr7	103375594	103376343	.	750	5.58503	3.0525	0.000377607	0.00852837	0	20.3627	0.961944	0.777438	17.7015	5.32438	0	15.4368	2.08316	0	27.1503	1.28259	1.03658	23.602	7.09917	0	20.5824	2.77755
chr1:15682112:15684006	chr1	15682112	15684006	.	1895	0.698886	7.68959	0.000380219	0.00857871	141.25	263.358	175.074	179.588	281.012	223.624	164.946	246.68	170.298	74.5382	138.975	92.3872	94.7695	148.291	118.007	87.043	130.174	89.8673
chr9:138402775:138404047	chr9	138402775	138404047	.	1273	1.99023	4.88273	0.000132568	0.00385731	2.73387	36.6529	32.7061	18.6585	54.2109	25.557	8.02442	30.8735	43.2256	2.14758	28.7925	25.6921	14.6571	42.5852	20.0762	6.30355	24.2526	33.9557
chr1:60144529:60145427	chr1	60144529	60145427	.	899	2.95677	3.92729	0.000296852	0.00706957	0	28.5078	21.1628	1.55488	22.1269	14.9083	6.24122	12.9669	18.7485	0	31.7106	23.5403	1.72956	24.6128	16.5832	6.9424	14.4237	20.8548
chr4:157244845:157245493	chr4	157244845	157245493	.	649	2.19452	4.45417	0.00038179	0.00860265	14.5806	43.4405	21.1628	5.44207	28.765	30.8814	0.891602	25.3163	16.6653	22.4663	66.9345	32.6083	8.38531	44.322	47.5831	1.37381	39.0082	25.6784
chr8:33390705:33391538	chr8	33390705	33391538	.	834	2.89561	4.03981	5.0799e-05	0.00187023	3.64516	17.6477	14.4292	2.33231	18.8079	15.9731	3.56641	33.9609	20.8316	4.3707	21.1603	17.3011	2.79654	22.5514	19.1524	4.27627	40.7205	24.978
chr8:109961140:109962114	chr8	109961140	109962114	.	975	3.51667	4.68198	3.93018e-08	6.67298e-06	8.20161	46.1555	26.9344	3.10975	55.3173	15.9731	1.7832	49.3977	11.9782	8.41191	47.339	27.625	3.18949	56.7357	16.3827	1.82893	50.6643	12.2853
chr8:13051140:13052571	chr8	13051140	13052571	.	1432	2.05003	4.44915	0.00039103	0.00877659	8.20161	51.5856	4.80972	18.6585	44.2538	0	6.24122	44.1492	6.24948	5.72738	36.0235	3.35874	13.0297	30.9035	0	4.35839	30.8304	4.36416
chr17:67535613:67536806	chr17	67535613	67536806	.	1194	2.48572	4.20273	0.000395824	0.00884292	0	33.9379	15.3911	7.77438	44.2538	12.7785	8.02442	15.128	18.7485	0	28.4237	12.8904	6.51121	37.0635	10.7023	6.72062	12.67	15.7022
chr12:5918126:5918628	chr12	5918126	5918628	.	503	1.95185	4.34167	0.00039622	0.00884492	11.8468	29.8653	8.65749	9.32925	47.5729	6.38926	8.02442	36.122	11.4574	23.5522	59.3744	17.2117	18.5472	94.5783	12.7023	15.9531	71.8132	22.7781
chr1:172607278:172608951	chr1	172607278	172608951	.	1674	0.983663	6.48458	0.000405549	0.00902135	78.3709	105.886	96.1944	38.8719	160.42	67.0872	65.9786	97.5604	83.8472	46.8166	63.2534	57.4638	23.221	95.8304	40.076	39.4137	58.2798	50.088
chr6:45491947:45492791	chr6	45491947	45492791	.	845	1.39995	5.61035	0.000151226	0.00423723	20.0484	51.5856	52.9069	35.7621	82.9759	60.6979	14.2656	53.72	55.2038	23.7259	61.048	62.6117	42.3221	98.1964	71.8319	16.8824	63.5739	65.3299
chr7:80408755:80410289	chr7	80408755	80410289	.	1535	1.93829	4.45791	0.000417076	0.00924615	5.46774	27.1503	11.5433	9.32925	37.6157	19.1678	10.6992	33.6522	28.6435	3.56205	17.6875	7.52008	6.07769	24.5054	12.4871	6.97018	21.9232	18.6602
chr12:13496065:13496977	chr12	13496065	13496977	.	913	1.94747	4.75649	0.000155113	0.00431744	3.64516	24.4353	22.1247	13.2164	37.6157	39.4004	10.6992	44.1492	32.8098	3.99251	26.7637	24.233	14.4758	41.2002	43.1549	11.7188	48.3561	35.9362
chr5:31962887:31963661	chr5	31962887	31963661	.	775	4.79094	3.48956	4.67988e-05	0.00174857	1.82258	13.5752	12.5053	0	26.5523	10.6488	0	15.4368	8.33265	2.35172	17.5163	16.1358	0	34.261	13.7403	0	19.9184	10.7518
chr22:39685857:39687289	chr22	39685857	39687289	.	1433	1.18074	5.68824	0.000424326	0.00932097	29.1613	77.3784	43.2875	38.8719	81.8696	57.5033	24.0733	54.0287	46.8711	20.3498	53.9975	30.2076	27.1262	57.1316	40.1279	16.7992	37.7032	32.7084
chr11:111401996:111402883	chr11	111401996	111402883	.	888	2.09957	4.2763	0.000427066	0.00935979	7.29032	36.6529	6.7336	6.99694	32.084	11.7136	8.02442	28.4037	23.4356	8.20982	41.2758	7.58289	7.87944	36.1307	13.191	9.03651	31.9861	26.3914
chr17:39681633:39682859	chr17	39681633	39682859	.	1227	1.3135	5.46759	0.00042682	0.00935979	23.6935	54.3006	37.5158	21.7683	63.0617	26.6219	27.6397	63.5995	65.0988	19.3101	44.2548	30.5752	17.741	51.395	21.6967	22.5262	51.8333	53.0553
chr4:145815439:145816326	chr4	145815439	145816326	.	888	1.62682	4.83336	0.000432939	0.00948129	16.4032	44.798	25.9725	7.77438	33.1904	34.076	14.2656	40.4443	27.0811	18.4721	50.4482	29.2483	8.75493	37.3765	38.3739	16.0649	45.5454	30.4967
chr2:20795453:20796536	chr2	20795453	20796536	.	1084	3.49991	3.55814	0.000436975	0.00956242	0	23.0778	4.80972	0.777438	17.7015	4.2595	4.45801	20.6853	15.6237	0	21.2894	4.43701	0.717194	16.3298	3.92943	4.11256	19.0824	14.413
chr12:115351624:115352610	chr12	115351624	115352610	.	987	1.34897	5.30797	0.000440525	0.00962551	16.4032	57.0156	22.1247	26.4329	46.4665	36.2058	27.6397	74.4052	34.893	16.6193	57.7666	22.4161	26.781	47.0785	36.6827	28.0037	75.3852	35.3525
chr2:19172350:19173536	chr2	19172350	19173536	.	1187	1.76621	4.90218	0.000441337	0.0096358	6.37903	46.1555	12.5053	16.3262	73.0188	30.8814	24.0733	42.2968	7.29106	5.37408	38.8842	10.5352	13.7542	61.5154	26.0163	20.2808	35.6333	6.14243
chr15:96665418:96666342	chr15	96665418	96666342	.	925	1.28418	5.40887	0.000444193	0.00967637	27.3387	62.4457	23.0866	31.0975	65.2744	34.076	19.6153	63.2908	42.7048	29.5554	67.5089	24.9585	33.6189	70.5669	36.839	21.2057	68.4224	46.1674
chr1:14672304:14673467	chr1	14672304	14673467	.	1164	1.9974	4.36116	0.000446777	0.00972532	8.20161	31.2229	5.77166	16.3262	59.7427	5.32438	7.13282	37.6657	1.56237	7.04606	26.8238	4.95847	14.0259	51.3253	4.57421	6.12785	32.3589	1.34224
chr2:31624434:31624865	chr2	31624434	31624865	.	432	1.97666	4.63791	0.000449639	0.00975998	5.46774	32.5804	20.2008	24.1006	61.9554	11.7136	2.67481	36.7395	16.1445	12.6568	75.4175	46.7611	55.7884	143.415	27.1149	6.19168	85.0452	37.3715
chr14:31743084:31743788	chr14	31743084	31743788	.	705	1.83476	4.62863	0.000186309	0.00498852	14.5806	52.9431	0.961944	14.7713	56.4236	5.32438	14.2656	47.5453	4.16632	20.6818	75.0966	1.36446	20.9522	80.0335	7.55231	20.2349	67.4401	5.90968
chr8:107901376:107901790	chr8	107901376	107901790	.	415	4.36957	3.22583	0.000449941	0.00975998	0	12.2176	0.961944	0.777438	23.2333	4.2595	1.7832	22.5377	3.12474	0	29.4401	2.31794	1.87334	55.9838	10.2639	4.29688	54.3077	7.5295
chr20:52811082:52811795	chr20	52811082	52811795	.	714	1.57769	4.90783	0.000450758	0.00976044	14.5806	31.2229	24.0486	17.8811	38.7221	26.6219	9.80763	54.6462	36.4553	20.4211	43.7295	33.6815	25.0435	54.2326	37.2856	13.7362	76.5352	51.0579
chr5:67629318:67630648	chr5	67629318	67630648	.	1331	0.633303	8.10814	0.000450729	0.00976044	206.863	328.519	287.621	226.234	362.881	225.754	231.817	340.226	260.395	155.419	246.821	216.094	169.973	272.638	169.612	174.167	255.617	195.639
chr6:54905132:54905633	chr6	54905132	54905633	.	502	3.27559	3.73656	0.000463927	0.00999446	0	27.1503	3.84777	8.55182	34.2967	0	0	28.0949	4.68711	0	54.0843	7.66489	17.0355	68.3201	0	0	55.966	9.33688
chr5:175017543:175018034	chr5	175017543	175018034	.	492	4.24742	3.50509	9.34472e-05	0.00294783	0.91129	27.1503	8.65749	1.55488	14.3825	15.9731	0	12.6582	10.4158	1.85222	55.1836	17.5965	3.16032	29.2327	32.4657	0	25.728	21.1703
chr7:17225085:17225928	chr7	17225085	17225928	.	844	3.78416	4.26003	4.7973e-07	4.9809e-05	3.64516	38.0104	21.1628	2.33231	37.6157	4.2595	1.7832	34.5784	16.1445	4.31891	45.0361	25.0744	2.7634	44.5684	5.04681	2.1128	40.9696	19.1286
chr12:15062942:15064222	chr12	15062942	15064222	.	1281	0.969266	6.75667	9.88012e-05	0.0030797	53.7661	109.959	118.319	80.0761	163.739	110.747	68.6534	124.42	130.198	41.972	85.8382	92.3646	62.5106	127.821	86.4536	53.5936	97.1275	101.637
chr5:127771904:127773413	chr5	127771904	127773413	.	1510	1.15207	6.25237	9.21552e-05	0.00292304	48.2984	86.881	98.1182	52.8658	112.847	89.4496	27.6397	88.6071	69.2651	31.9857	57.5371	64.979	35.0104	74.7333	59.2381	18.3044	58.6802	45.8709
chr4:158192438:158193099	chr4	158192438	158193099	.	662	7.97771	3.46087	1.81842e-06	0.000139223	0	19.0052	0.961944	0	19.9142	4.2595	0	29.3299	8.85344	0	28.7088	1.45309	0	30.0819	6.4343	0	44.3049	13.3738
chr2:69198879:69199719	chr2	69198879	69199719	.	841	2.01485	4.55116	0.000464681	0.00999446	9.1129	44.798	42.3255	9.32925	12.1698	21.2975	3.56641	33.3434	22.394	10.8358	53.2675	50.3276	11.093	14.4706	25.324	4.24068	39.6474	26.6278
chr9:71545749:71546321	chr9	71545749	71546321	.	573	4.10324	3.8403	6.67029e-06	0.000395342	0	31.2229	12.5053	1.55488	28.765	7.45413	2.67481	18.8329	14.5821	0	54.4901	21.8242	2.71357	50.2007	13.009	4.66808	32.8671	25.4487
chr7:24865706:24866428	chr7	24865706	24866428	.	723	1.09441	6.2834	0.000109933	0.00332532	46.4758	123.534	84.651	37.317	73.0188	86.2549	52.6045	95.708	89.0552	64.2819	170.863	117.083	51.6141	100.994	119.301	72.7587	132.376	123.174
chr12:5282451:5283510	chr12	5282451	5283510	.	1060	2.26726	5.14523	4.59996e-06	0.000291169	13.6694	48.8706	61.5644	9.32925	51.9982	12.7785	11.5908	64.217	30.2058	12.8956	46.1043	58.0796	8.80118	49.0549	12.0552	10.9347	60.582	28.4961
chr21:33996976:33997608	chr21	33996976	33997608	.	633	4.71245	3.43999	7.49086e-05	0.00249384	0	10.8601	12.5053	1.55488	16.5952	9.58388	0	22.5377	8.33265	0	17.1566	19.7556	2.45636	26.2167	15.1404	0	35.6046	13.1637
chr13:75709561:75709890	chr13	75709561	75709890	.	330	5.13023	3.2314	0.0003291	0.00767636	0	16.2902	5.77166	0.777438	5.53173	17.038	0	16.6717	8.33265	0	49.3642	17.4899	2.35587	16.7628	51.6303	0	50.5203	25.2504
chr5:153577510:153578494	chr5	153577510	153578494	.	985	3.80603	3.90658	1.79231e-05	0.000852276	0	32.5804	9.61944	0.777438	14.3825	19.1678	4.45801	28.7124	11.9782	0	33.0765	9.76592	0.789277	14.6015	19.4597	4.5259	29.1496	12.1606
chr6:107982001:107982795	chr6	107982001	107982795	.	795	3.05973	3.85014	0.000254484	0.00633165	5.46774	13.5752	18.2769	1.55488	23.2333	14.9083	0	22.2289	16.1445	6.87766	17.0757	22.9898	1.95582	29.2242	18.7525	0	27.9609	20.3075
chr5:82664006:82664813	chr5	82664006	82664813	.	808	3.24418	4.53076	2.01783e-06	0.000150888	0	35.2954	11.5433	3.88719	49.7856	20.2326	8.91602	38.9007	26.0395	0	43.6824	14.2863	4.81088	61.6158	25.0404	11.0347	48.1444	32.2271
chr4:118245731:118246899	chr4	118245731	118246899	.	1169	1.04287	6.98618	1.38302e-05	0.000693048	96.5967	161.544	149.101	80.0761	177.015	130.98	59.7374	150.354	123.427	82.6319	138.19	127.546	68.4997	151.425	112.044	51.1013	128.618	105.584
chr9:115010790:115012102	chr9	115010790	115012102	.	1313	1.8223	5.09549	0.000190146	0.00507483	2.73387	42.083	43.2875	10.1067	38.7221	44.7248	25.8565	54.6462	31.7682	2.08216	32.051	32.9684	7.69741	29.4913	34.0631	19.6927	41.6193	24.1951
chr11:102216321:102218391	chr11	102216321	102218391	.	2071	1.80882	4.78607	0.000393121	0.00880981	6.37903	21.7202	44.2494	15.5488	54.2109	33.0112	8.02442	31.1823	21.8732	3.08017	10.4878	21.3662	7.50785	26.1762	15.9397	3.87466	15.0566	10.5617
chr9:127427392:127428597	chr9	127427392	127428597	.	1206	0.712683	7.57793	0.000412087	0.0091496	113	234.85	244.334	138.384	205.78	207.651	152.464	221.981	188.526	93.6981	194.735	202.598	114.746	170.63	172.181	126.421	184.064	156.323
chr12:13723816:13724498	chr12	13723816	13724498	.	683	1.42378	5.78931	6.20339e-05	0.00216511	25.5161	59.7307	65.4122	21.7683	100.677	78.8008	34.7725	61.1296	39.0593	37.3589	87.4534	95.7718	31.8715	147.405	115.375	50.9114	89.5016	57.1878
chr1:31869700:31870673	chr1	31869700	31870673	.	974	2.91669	5.81834	2.39578e-11	1.72879e-08	17.3145	114.031	31.7441	11.6616	133.868	22.3624	16.9404	100.339	47.9127	17.7767	117.075	32.5915	11.9729	137.441	22.9593	17.3927	103.017	49.1917
chr2:179378448:179379946	chr2	179378448	179379946	.	1499	3.28268	5.23579	3.72537e-10	1.43372e-07	3.64516	62.4457	25.0105	9.32925	81.8696	24.4921	10.6992	88.2983	19.2692	2.43173	41.6582	16.6848	6.22365	54.6161	16.339	7.13758	58.9048	12.8547
chr2:53089880:53090198	chr2	53089880	53090198	.	319	3.20816	3.61133	0.000413004	0.00916291	1.82258	14.9327	18.2769	0.777438	22.1269	11.7136	2.67481	13.5844	11.9782	5.71342	46.8109	57.2944	2.43711	69.3634	36.7199	8.38498	42.5842	37.5491
chr2:154679886:154680804	chr2	154679886	154680804	.	919	3.8297	3.54404	0.000145159	0.00409671	0.91129	19.0052	13.4672	1.55488	6.63807	12.7785	0.891602	25.3163	8.85344	0.991611	20.6803	14.6542	1.69192	7.22315	13.9048	0.970188	27.5477	9.63377
chr12:43184373:43185250	chr12	43184373	43185250	.	878	1.60563	5.07852	0.000230961	0.0058839	21.871	33.9379	45.2113	9.32925	48.6792	38.3355	12.4824	48.4715	32.289	24.91	38.6536	51.4936	10.6256	55.4433	43.6623	14.2169	55.2067	36.7756
chr8:104889849:104890839	chr8	104889849	104890839	.	991	3.29925	4.2554	2.97499e-06	0.000206419	1.82258	33.9379	23.0866	6.2195	32.084	15.9731	1.7832	35.5046	8.85344	1.83913	34.2461	23.2963	6.27599	32.3754	16.1182	1.7994	35.827	8.93384
chr6:128918895:128920237	chr6	128918895	128920237	.	1343	1.39337	5.62058	0.000156038	0.00433481	31.8952	82.8084	72.1458	22.5457	43.1475	37.2707	18.7237	66.6868	54.683	23.7492	61.6593	53.7199	16.7876	32.1277	27.7518	13.9417	49.6551	40.717
chr5:73324218:73324523	chr5	73324218	73324523	.	306	2.14115	4.65521	4.68886e-05	0.00174857	6.37903	21.7202	32.7061	8.55182	43.1475	25.557	9.80763	43.5317	20.8316	20.8465	70.9812	106.883	27.9471	141.005	83.5197	32.0511	142.26	68.0772
chr2:47425855:47426564	chr2	47425855	47426564	.	710	3.79549	3.6775	7.52321e-05	0.00249885	0	14.9327	12.5053	3.10975	26.5523	6.38926	0.891602	20.0678	16.1445	0	21.0319	17.6131	4.37993	37.3976	8.99895	1.25578	28.2645	22.7387
chr14:53924862:53925788	chr14	53924862	53925788	.	927	1.26029	6.02402	3.55596e-05	0.00142753	37.3629	97.7411	74.0697	30.3201	85.1886	57.5033	40.1221	77.1839	73.9522	40.3052	105.438	79.9025	32.7077	91.8971	62.0316	43.2817	83.262	79.7759
chr7:16524068:16525650	chr7	16524068	16525650	.	1583	0.897179	6.97258	0.000263775	0.00648913	105.71	114.031	163.53	63.7499	192.504	119.266	75.7862	148.193	134.364	66.778	72.0349	103.304	40.2716	121.607	75.3418	47.8751	93.6153	84.8793
chr5:148003131:148003833	chr5	148003131	148003833	.	703	1.99228	4.4682	0.000349213	0.00801247	5.46774	14.9327	27.8964	9.32925	29.8713	20.2326	7.13282	41.0618	26.5603	7.77772	21.2413	39.6819	13.2706	42.4912	28.7804	10.1463	58.4094	37.7814
chr11:106914131:106914699	chr11	106914131	106914699	.	569	2.6504	4.44719	2.1853e-05	0.00099333	2.73387	33.9379	30.7822	3.10975	39.8284	20.2326	10.6992	31.1823	12.499	4.80469	59.6448	54.0988	5.46529	69.9973	35.5582	18.8036	54.8019	21.9666
chr12:54191717:54193252	chr12	54191717	54193252	.	1536	2.62631	4.03227	0.000200848	0.00529917	1.82258	23.0778	14.4292	3.88719	14.3825	25.557	5.34961	31.1823	13.0198	1.18658	15.0246	9.39398	2.53072	9.3636	16.6387	3.48282	20.301	8.47641
chr15:52385705:52386516	chr15	52385705	52386516	.	812	1.68461	5.1784	0.000143961	0.00408584	18.2258	33.9379	27.8964	18.6585	34.2967	51.114	8.91602	74.714	41.1424	22.4456	41.7954	34.3551	22.9785	42.2373	62.9483	10.9803	92.0123	50.668
chr3:193019005:193019811	chr3	193019005	193019811	.	807	1.82628	5.07546	3.28654e-05	0.00135447	9.1129	38.0104	32.7061	15.5488	60.849	39.4004	16.0488	46.619	32.289	11.2923	47.1009	40.528	19.2674	75.4015	48.8233	19.887	57.7683	40.0112
chr18:8045464:8046701	chr18	8045464	8046701	.	1238	4.35093	3.77104	2.32526e-05	0.00103895	2.73387	44.798	2.88583	0	21.0206	7.45413	0.891602	12.6582	20.8316	2.2083	36.1858	2.33104	0	16.9795	6.02111	0.720196	10.2247	16.8268
chr5:153456604:153457745	chr5	153456604	153457745	.	1142	3.3844	4.11421	4.53403e-06	0.000288689	1.82258	27.1503	8.65749	1.55488	32.084	15.9731	5.34961	33.0347	16.1445	1.59595	23.7743	7.58099	1.36154	28.0946	13.987	4.68443	28.927	14.137
chr3:35986533:35987806	chr3	35986533	35987806	.	1274	3.15947	4.15969	9.27624e-06	0.000514903	3.64516	35.2954	21.1628	5.44207	32.084	12.7785	0.891602	26.2425	11.9782	2.86119	27.7044	16.6113	4.27164	25.1837	10.0302	0.699845	20.5985	9.40202
chr9:108122243:108122812	chr9	108122243	108122812	.	570	4.96959	3.47664	3.46576e-05	0.001405	0	19.0052	15.3911	1.55488	23.2333	6.38926	0	18.8329	3.64553	0	33.3425	27.0019	2.72785	40.7601	11.2092	0	33.0401	6.39567
chr8:126654802:126655382	chr8	126654802	126655382	.	581	6.60765	3.95384	1.4556e-07	1.9011e-05	0	57.0156	2.88583	0.777438	23.2333	15.9731	0	30.2561	0.52079	0	98.1336	4.96701	1.3381	39.9884	27.4925	0	52.0759	0.896369
chr12:106808807:106809419	chr12	106808807	106809419	.	613	2.74028	4.92965	3.68608e-07	3.99981e-05	2.73387	57.0156	18.2769	11.6616	70.8061	27.6868	9.80763	39.8269	26.0395	4.45982	93.0108	29.8155	19.0238	115.508	45.166	15.9994	64.9704	42.4788
chr8:122174490:122175603	chr8	122174490	122175603	.	1114	3.17794	4.49219	3.93306e-07	4.20459e-05	7.29032	35.2954	14.4292	3.10975	55.3173	15.9731	3.56641	37.0482	18.2277	6.54427	31.6835	12.9526	2.79152	49.6564	14.3385	3.20145	33.257	16.3624
chr10:44108636:44109345	chr10	44108636	44109345	.	710	3.14793	4.18434	5.15517e-05	0.00189071	1.82258	38.0104	30.7822	7.77438	35.4031	12.7785	0	19.1416	8.85344	2.56701	53.5358	43.3552	10.9498	49.8635	17.9979	0	26.96	12.4696
chr2:157765430:157765758	chr2	157765430	157765758	.	329	4.23978	3.47893	0.000143281	0.00408259	0	16.2902	19.2389	0.777438	12.1698	6.38926	1.7832	24.0814	4.68711	0	49.5142	58.4768	2.36303	36.9903	19.4202	5.42008	73.1956	14.2465
chr5:67175164:67175927	chr5	67175164	67175927	.	764	2.81428	3.92397	0.00014729	0.0041396	3.64516	25.7928	13.4672	1.55488	26.5523	18.1029	4.45801	17.2892	14.5821	4.77115	33.7602	17.6272	2.03518	34.7543	23.6949	5.83509	22.6298	19.0866
chr4:177364211:177365421	chr4	177364211	177365421	.	1211	1.9248	6.07477	3.04408e-08	5.59646e-06	21.871	127.606	63.4883	34.2073	132.761	55.3735	31.2061	78.4188	52.079	18.0602	105.373	52.4263	28.2471	109.63	45.7255	25.7689	64.7554	43.005
chr9:93900869:93901741	chr9	93900869	93901741	.	873	1.78745	5.53365	3.52673e-06	0.000238805	10.9355	71.9483	46.1733	27.2103	69.6998	41.5302	22.2901	69.4655	44.788	12.5263	82.415	52.8904	31.1688	79.8394	47.5718	25.5327	79.571	51.3035
chr10:126124158:126125499	chr10	126124158	126125499	.	1342	2.09485	4.95092	3.61068e-05	0.00144124	21.871	65.1607	1.92389	15.5488	57.53	0	10.6992	81.8149	8.85344	16.2973	48.5549	1.4336	11.5863	42.8688	0	7.9726	60.9649	6.5972
chr12:5368402:5369058	chr12	5368402	5369058	.	657	4.75362	3.40344	0.000173273	0.00472719	0	9.50261	18.2769	0	35.4031	5.32438	1.7832	9.5708	5.2079	0	14.4636	27.8188	0	53.8859	8.10408	2.71416	14.5674	7.92679
chr11:86343421:86344734	chr11	86343421	86344734	.	1314	1.34852	5.74407	0.000176336	0.00480165	12.7581	71.9483	54.8308	45.0914	60.849	67.0872	24.0733	77.4926	54.683	9.70933	54.7552	41.7281	34.3161	46.3082	51.0557	18.3206	58.9746	41.6157
chr6:72114381:72115389	chr6	72114381	72115389	.	1009	2.11979	4.9657	3.98711e-05	0.00154683	2.73387	43.4405	30.7822	12.439	64.168	44.7248	16.9404	35.5046	20.3108	2.70948	43.053	30.5076	12.3281	63.5957	44.3259	16.7893	35.1879	20.1297
chr7:93539737:93540572	chr7	93539737	93540572	.	836	3.09589	4.06621	6.44178e-05	0.00222145	0	28.5078	8.65749	4.66463	27.6586	9.58388	4.45801	25.625	27.0811	0	34.1003	10.3559	5.5797	33.0845	11.464	5.33255	30.652	32.3937
chr3:100215338:100216299	chr3	100215338	100216299	.	962	2.67505	4.25169	5.78526e-05	0.00206155	6.37903	32.5804	8.65749	2.33231	37.6157	17.038	5.34961	21.3027	28.1227	6.63101	33.8673	8.99947	2.42444	39.1016	17.711	5.56093	22.1442	29.2336
chr13:99983725:99984715	chr13	99983725	99984715	.	991	7.4457	3.12497	0.000128059	0.00376022	0	17.6477	8.65749	0	13.2761	0	0	16.6717	7.81186	0	17.808	8.73612	0	13.3967	0	0	16.8231	7.8828
chr5:67069015:67069791	chr5	67069015	67069791	.	777	1.30261	6.10991	0.000207295	0.00542707	12.7581	82.8084	104.852	43.5365	76.3378	51.114	53.4961	109.601	72.3899	16.4196	106.575	134.944	56.0316	98.2469	65.7838	68.8496	141.057	93.1658
chr2:192500112:192501715	chr2	192500112	192501715	.	1604	1.37973	6.9095	6.25164e-08	9.72603e-06	67.4355	206.342	121.205	66.0822	155.995	109.682	71.3282	172.583	99.471	42.0421	128.642	75.5641	41.1984	97.2536	68.3804	44.469	107.595	62.0143
chr9:94557571:94558864	chr9	94557571	94558864	.	1294	1.43771	5.15875	0.000371298	0.0084122	14.5806	48.8706	44.2494	17.8811	54.2109	34.076	18.7237	37.9745	39.0593	11.2679	37.767	34.1958	13.8184	41.8941	26.3339	14.4696	29.3466	30.1849
chr2:196398542:196399723	chr2	196398542	196399723	.	1182	1.58989	5.43418	9.75134e-05	0.00304284	26.4274	63.8032	41.3636	24.878	77.4442	45.7897	8.02442	41.988	48.4335	22.3582	53.979	34.9946	21.0474	65.5196	38.7391	6.78885	35.5229	40.9759
chr16:80231076:80232365	chr16	80231076	80232365	.	1290	4.51123	3.82598	2.00017e-06	0.000149956	1.82258	12.2176	3.84777	0.777438	35.4031	10.6488	0.891602	35.5046	9.89502	1.41285	9.47104	2.98277	0.602665	27.4442	8.25485	0.691165	27.5229	7.67056
chr12:44975751:44976889	chr12	44975751	44976889	.	1139	3.2408	5.69122	6.86806e-11	3.8123e-08	20.9597	97.7411	36.5539	3.88719	133.868	28.7516	10.6992	100.648	20.8316	18.4018	85.8131	32.0929	3.41281	117.531	25.2429	9.39353	88.365	18.2894
chr4:157692150:157693517	chr4	157692150	157693517	.	1368	5.80041	3.35693	3.62876e-05	0.00144271	0	38.0104	9.61944	0.777438	14.3825	1.06488	0	11.1145	8.33265	0	27.7854	7.03175	0.568303	10.5135	0.778418	0	8.12462	6.09112
chr20:30262840:30263620	chr20	30262840	30263620	.	781	4.97159	3.80404	7.84872e-07	7.40344e-05	0	31.2229	10.5814	1.55488	22.1269	7.45413	0.891602	34.2696	3.64553	0	39.978	13.5485	1.99088	28.3315	9.54434	1.14162	43.8792	4.66778
chr18:28203360:28204244	chr18	28203360	28204244	.	885	1.33893	5.57949	0.000251337	0.00628648	31.8952	73.3058	44.2494	29.5426	63.0617	52.1789	12.4824	53.72	57.8077	36.0397	82.8314	49.9993	33.3815	71.2562	58.9592	14.1044	60.7005	65.3195
chr20:38451313:38452434	chr20	38451313	38452434	.	1122	6.58485	3.88854	7.96653e-08	1.19143e-05	0	33.9379	0	0.777438	47.5729	5.32438	0	26.86	7.81186	0	30.2477	0	0.692904	42.4001	4.74544	0	23.9394	6.96244
chr9:102876201:102876776	chr9	102876201	102876776	.	576	5.28236	3.13402	0.000362351	0.00822888	0	16.2902	5.77166	0.777438	15.4888	9.58388	0	11.7319	7.29106	0	28.2816	10.0202	1.34972	26.8903	16.6387	0	20.368	12.6581
chr1:5767367:5768328	chr1	5767367	5768328	.	962	2.5417	5.38785	4.13008e-08	6.85119e-06	15.4919	88.2385	40.4016	13.2164	103.996	25.557	10.6992	43.5317	27.6019	16.1039	91.724	41.9975	13.7385	108.104	26.5666	11.1219	45.2512	28.6922
chr15:63389018:63390172	chr15	63389018	63390172	.	1155	3.7424	3.65365	0.000160635	0.00442843	0	17.6477	14.4292	0	19.9142	8.51901	4.45801	23.4639	10.4158	0	15.2794	12.4928	0	17.2417	7.37576	3.85975	20.3151	9.01801

## Sheet: Hct116 Jun decreased Fbw7-Del
Geneid	Chr	Start	End	Strand	Length	Del_vs_WT.logFC	Del_vs_WT.logCPM	Del_vs_WT.PValue	Del_vs_WT.FDR	CPM.TMMnormalized.Sample_DJ_HsSc_10WJ_1019	CPM.TMMnormalized.Sample_DJ_HsSc_11NJ_1019	CPM.TMMnormalized.Sample_DJ_HsSc_12RJ_1019	CPM.TMMnormalized.Sample_DJ_HsSc_13WJ_1019	CPM.TMMnormalized.Sample_DJ_HsSc_14NJ_1019	CPM.TMMnormalized.Sample_DJ_HsSc_15RJ_1019	CPM.TMMnormalized.Sample_DJ_HsSc_16WJ_1019	CPM.TMMnormalized.Sample_DJ_HsSc_17NJ_1019	CPM.TMMnormalized.Sample_DJ_HsSc_18RJ_1019	FPKM.TMMnormalized.Sample_DJ_HsSc_10WJ_1019	FPKM.TMMnormalized.Sample_DJ_HsSc_11NJ_1019	FPKM.TMMnormalized.Sample_DJ_HsSc_12RJ_1019	FPKM.TMMnormalized.Sample_DJ_HsSc_13WJ_1019	FPKM.TMMnormalized.Sample_DJ_HsSc_14NJ_1019	FPKM.TMMnormalized.Sample_DJ_HsSc_15RJ_1019	FPKM.TMMnormalized.Sample_DJ_HsSc_16WJ_1019	FPKM.TMMnormalized.Sample_DJ_HsSc_17NJ_1019	FPKM.TMMnormalized.Sample_DJ_HsSc_18RJ_1019
chr1:153071738:153073240	chr1	153071738	153073240	.	1503	-2.45574	7.44242	9.74439e-16	1.08008e-11	441.064	80.0934	31.7441	352.179	81.8696	29.8165	446.693	66.6868	22.394	293.456	53.289	21.1205	234.318	54.4708	19.838	297.201	44.3692	14.8995
chr13:38230488:38231830	chr13	38230488	38231830	.	1343	-3.22555	5.49922	7.96424e-11	4.17963e-08	82.0161	16.2902	1.92389	116.616	5.53173	2.12975	148.898	14.2018	5.72869	61.0693	12.1297	1.43253	86.8322	4.11893	1.58582	110.869	10.5747	4.26559
chr8:109255122:109256059	chr8	109255122	109256059	.	938	-2.19978	6.6578	1.50626e-11	1.14412e-08	244.226	36.6529	45.2113	194.359	54.2109	44.7248	204.177	47.5453	24.4771	260.369	39.0756	48.1997	207.206	57.7942	47.681	217.673	50.6879	26.095
chr2:17622761:17624001	chr2	17622761	17624001	.	1241	-1.83086	4.9146	0.000137415	0.00396238	92.0403	24.4353	0	58.3078	5.53173	0	52.6045	25.0076	0	74.1662	19.69	0	46.9846	4.45748	0	42.3888	20.1511	0
chr17:6775044:6776019	chr17	6775044	6776019	.	976	-3.97448	6.1362	6.36893e-14	1.31309e-10	110.266	8.14509	119.281	115.061	13.2761	85.1901	106.101	3.70482	59.3701	112.978	8.34538	122.214	117.89	13.6026	87.2849	108.71	3.79593	60.83
chr3:196290077:196291485	chr3	196290077	196291485	.	1409	-6.0416	5.75506	3.77756e-13	5.73871e-10	45.5645	6.78758	63.4883	104.954	0	71.3467	90.0518	0	89.0552	32.3382	4.8173	45.0591	74.4884	0	50.6364	63.9119	0	63.2045
chr18:44684555:44685579	chr18	44684555	44685579	.	1025	-5.86678	4.92384	8.38538e-13	1.10016e-09	53.7661	0	29.8202	51.3109	1.10635	33.0112	51.7129	0.926206	37.4969	52.4547	0	29.0929	50.0594	1.07936	32.206	50.4517	0.903616	36.5823
chr7:146658378:146659585	chr7	146658378	146659585	.	1208	-3.38357	5.08633	2.49588e-10	1.00057e-07	75.6371	10.8601	3.84777	90.9602	4.42538	2.12975	91.8351	8.95333	3.64553	62.6135	8.99017	3.18524	75.2982	3.6634	1.76304	76.0224	7.41169	3.01782
chr2:57600283:57601447	chr2	57600283	57601447	.	1165	-3.45354	5.80226	1.81547e-12	2.1834e-09	88.3951	13.5752	73.1077	98.7346	6.63807	63.8926	69.545	5.86597	68.7443	75.8757	11.6525	62.7534	84.7507	5.69792	54.8434	59.6953	5.03517	59.008
chr20:20529949:20530911	chr20	20529949	20530911	.	963	-1.11586	6.15373	9.55454e-05	0.00299113	172.234	54.3006	24.0486	115.838	60.849	22.3624	98.0763	61.7471	18.2277	178.851	56.3869	24.9726	120.289	63.1869	23.2216	101.845	64.1195	18.928
chr1:233804491:233805074	chr1	233804491	233805074	.	584	-4.41525	5.46271	2.49277e-12	2.64027e-09	73.8145	6.78758	54.8308	67.6371	5.53173	57.5033	75.7862	1.23494	41.1424	126.395	11.6226	93.8883	115.817	9.47214	98.4646	129.771	2.11463	70.4494
chr15:59482966:59484539	chr15	59482966	59484539	.	1574	-3.99419	5.56628	4.02096e-12	4.00211e-09	53.7661	2.71503	86.5749	41.9816	4.42538	83.0603	49.9297	2.46988	87.4928	34.1589	1.72492	55.0031	26.6719	2.81155	52.7702	31.7216	1.56918	55.5863
chr6:138299471:138300057	chr6	138299471	138300057	.	587	-4.22913	5.13846	5.72702e-12	5.33241e-09	74.7258	1.35752	4.80972	115.838	3.31904	9.58388	81.1358	6.79218	5.2079	127.301	2.31263	8.19373	197.339	5.65424	16.3269	138.221	11.571	8.87207
chr1:90355735:90356243	chr1	90355735	90356243	.	509	-3.53971	5.70264	7.21407e-12	6.3244e-09	98.4193	16.2902	49.0591	69.9694	3.31904	55.3735	114.125	6.79218	42.7048	193.358	32.0043	96.3833	137.464	6.5207	108.789	224.214	13.3442	83.8994
chr9:114874600:114875816	chr9	114874600	114875816	.	1217	-2.24117	6.81578	7.23064e-12	6.3244e-09	186.814	33.9379	128.9	153.933	24.3396	112.877	145.331	40.7531	171.861	153.504	27.8865	105.917	126.485	19.9997	92.7501	119.418	33.4865	141.217
chr2:67516996:67518232	chr2	67516996	67518232	.	1237	-2.16375	5.44646	2.78708e-07	3.1797e-05	116.645	31.2229	9.61944	87.8505	17.7015	6.38926	77.5694	16.6717	16.1445	94.2968	25.2408	7.77642	71.019	14.31	5.16512	62.7077	13.4775	13.0513
chr8:54646982:54647684	chr8	54646982	54647684	.	703	-2.51841	5.28763	5.53623e-08	8.7801e-06	71.0806	9.50261	16.353	90.9602	17.7015	6.38926	103.426	17.2892	5.2079	101.11	13.5172	23.2618	129.389	25.18	9.08856	147.121	24.5934	7.40811
chr2:227476485:227477215	chr2	227476485	227477215	.	731	-4.49964	5.56398	3.06488e-11	2.1063e-08	64.7016	4.07255	46.1733	86.2956	11.0635	61.7628	93.6183	0.308735	44.788	88.5111	5.5712	63.1646	118.051	15.1347	84.4908	128.069	0.422347	61.2695
chr4:5371956:5373336	chr4	5371956	5373336	.	1381	-1.63353	5.31152	2.32056e-05	0.00103846	85.6613	25.7928	13.4672	70.7468	22.1269	5.32438	82.919	28.0949	9.89502	62.0284	18.6769	9.75178	51.2287	16.0224	3.85545	60.0427	20.3439	7.16511
chr19:24236933:24237802	chr19	24236933	24237802	.	870	-3.55785	6.02386	8.20146e-11	4.22727e-08	71.9919	1.35752	68.298	85.5182	0	103.293	135.524	14.8193	90.0967	82.7493	1.56036	78.5034	98.2967	0	118.728	155.774	17.0337	103.559
chr2:208497094:208498436	chr2	208497094	208498436	.	1343	-1.34571	5.92533	1.48907e-05	0.000737229	126.669	32.5804	25.9725	104.954	55.3173	22.3624	99.8595	41.988	23.9564	94.3182	24.2594	19.3391	78.149	41.1893	16.6511	74.3555	31.2643	17.8379
chr10:82265535:82266481	chr10	82265535	82266481	.	947	-2.43231	6.17884	1.7337e-10	7.64822e-08	97.508	12.2176	85.613	120.503	21.0206	52.1789	126.608	26.2425	94.7838	102.965	12.9014	90.4044	127.247	22.197	55.0992	133.693	27.7112	100.089
chr14:93706347:93707156	chr14	93706347	93707156	.	810	-4.0994	5.312	3.46957e-10	1.37186e-07	83.8387	9.50261	40.4016	69.192	7.74442	40.4653	65.9786	0.617471	27.6019	103.505	11.7316	49.8786	85.4222	9.56101	49.9571	81.455	0.76231	34.0764
chr13:30875220:30876529	chr13	30875220	30876529	.	1310	-3.36151	5.55716	3.518e-10	1.37221e-07	70.1693	0	48.0972	85.5182	6.63807	75.6062	54.3878	9.5708	59.3701	53.5644	0	36.7154	65.281	5.06723	57.7146	41.5174	7.30595	45.3207
chr15:59491916:59493013	chr15	59491916	59493013	.	1098	-2.75546	6.15225	3.85277e-10	1.44424e-07	66.5242	4.07255	76.9555	133.719	28.765	94.774	131.957	15.4368	73.9522	60.5867	3.70906	70.087	121.784	26.1976	86.3151	120.18	14.059	67.3518
chr12:66158585:66159807	chr12	66158585	66159807	.	1223	-1.3745	6.58127	6.18407e-07	6.12752e-05	183.169	62.4457	56.7547	176.478	74.1252	60.6979	141.765	58.351	35.4137	149.77	51.0594	46.4061	144.3	60.6093	49.6304	115.916	47.7114	28.9565
chr2:227620537:227621556	chr2	227620537	227621556	.	1020	-1.49143	7.59706	4.96806e-10	1.79247e-07	247.871	80.0934	203.932	262.774	110.635	218.3	290.662	93.5468	220.815	243.011	78.5229	199.933	257.622	108.465	214.019	284.963	91.7126	216.485
chr7:73512102:73513074	chr7	73512102	73513074	.	973	-3.77265	6.11686	1.74215e-13	2.95796e-10	164.944	6.78758	24.0486	171.814	1.10635	38.3355	148.006	19.4503	35.4137	169.521	6.97593	24.7159	176.581	1.13705	39.3993	152.113	19.9901	36.3964
chr14:93725205:93725892	chr14	93725205	93725892	.	688	-5.56099	4.70069	5.88315e-10	1.97455e-07	72.9032	4.07255	35.5919	40.4268	0	20.2326	27.6397	0.308735	20.3108	105.964	5.9194	51.7324	58.7598	0	29.4079	40.1739	0.448743	29.5215
chr10:30735802:30736454	chr10	30735802	30736454	.	653	-2.28336	5.10539	6.20441e-06	0.000373092	70.1693	9.50261	16.353	72.3017	27.6586	4.2595	83.8106	10.8057	2.60395	107.457	14.5522	25.0429	110.722	42.3563	6.52298	128.347	16.5478	3.98767
chr20:46062793:46063517	chr20	46062793	46063517	.	725	-1.9583	4.7457	0.00010156	0.0031453	52.8548	24.4353	6.7336	54.4207	8.85076	6.38926	62.4122	12.0407	1.56237	72.9032	33.7038	9.28773	75.063	12.208	8.81277	86.0858	16.6078	2.15499
chr17:70889295:70891179	chr17	70889295	70891179	.	1885	-2.56382	5.85248	1.24145e-10	6.0734e-08	139.427	20.3627	26.9344	129.832	21.0206	23.4273	89.1602	19.4503	36.4553	73.9668	10.8025	14.2888	68.8765	11.1515	12.4283	47.2999	10.3185	19.3397
chr7:157724941:157726912	chr7	157724941	157726912	.	1972	-1.19646	8.99367	6.58752e-10	2.16071e-07	681.645	270.146	537.726	636.722	275.48	563.319	739.138	346.71	522.874	345.662	136.991	272.681	322.881	139.696	285.659	374.817	175.816	265.149
chr5:121363562:121364298	chr5	121363562	121364298	.	737	-3.18957	5.37416	1.2673e-09	3.93327e-07	36.4516	6.78758	43.2875	96.4023	3.31904	39.4004	68.6534	9.5708	54.1622	49.4594	9.20974	58.7347	130.804	4.50344	53.4605	93.1525	12.9862	73.4901
chr12:74437125:74437438	chr12	74437125	74437438	.	314	-2.2619	5.26827	1.25976e-06	0.000106633	108.444	8.14509	6.7336	97.1797	18.8079	19.1678	44.5801	21.9202	7.81186	345.362	25.9398	21.4446	309.49	59.8977	61.0438	141.975	69.8096	24.8785
chr2:81531211:81532343	chr2	81531211	81532343	.	1133	-2.5789	5.74542	1.86415e-09	5.46638e-07	57.4113	12.2176	70.2219	68.4145	7.74442	72.4116	108.776	16.363	55.7246	50.6719	10.7834	61.9787	60.3835	6.83532	63.9114	96.0066	14.4422	49.1832
chr17:64546711:64548572	chr17	64546711	64548572	.	1862	-1.37395	7.97302	3.25367e-09	8.77701e-07	351.758	169.689	287.621	308.643	102.89	223.624	396.763	136.461	270.29	188.914	91.1329	154.469	165.759	55.2579	120.099	213.084	73.2874	145.161
chr8:38266595:38267653	chr8	38266595	38267653	.	1059	-3.93174	4.82326	3.50665e-09	9.37185e-07	69.258	1.35752	34.63	63.7499	4.42538	13.8434	25.8565	3.70482	23.9564	65.3995	1.28188	32.7006	60.1982	4.17883	13.0721	24.4159	3.49842	22.6217
chr6:106820802:106821507	chr6	106820802	106821507	.	706	-1.38572	5.41909	0.000141574	0.00404592	85.6613	38.0104	20.2008	74.634	19.9142	12.7785	75.7862	32.1085	13.0198	121.333	53.8391	28.6131	105.714	28.2071	18.0999	107.346	45.4794	18.4416
chr11:117151675:117152341	chr11	117151675	117152341	.	667	-4.91919	4.24462	6.35547e-09	1.5679e-06	31.8952	1.35752	13.4672	43.5365	0	14.9083	37.4473	1.54368	13.0198	47.8188	2.03526	20.1907	65.2721	0	22.3512	56.1429	2.31436	19.5199
chr6:80279906:80280591	chr6	80279906	80280591	.	686	-2.44929	5.62899	2.16489e-09	6.12622e-07	108.444	10.8601	25.9725	83.1859	18.8079	26.6219	114.125	22.8464	20.8316	158.081	15.8311	37.8608	121.262	27.4167	38.8074	166.363	33.3038	30.3668
chrX:67648018:67649462	chrX	67648018	67649462	.	1445	-2.29408	5.77477	7.0278e-09	1.67645e-06	101.153	14.9327	48.0972	64.5273	24.3396	52.1789	96.2931	15.128	62.4948	70.0022	10.334	33.2852	44.6556	16.844	36.11	66.6388	10.4692	43.249
chr8:6414638:6415973	chr8	6414638	6415973	.	1336	-2.99187	5.302	7.93994e-09	1.86324e-06	40.0968	5.43006	73.1077	41.2042	4.42538	67.0872	65.087	7.10091	39.0593	30.0125	4.06442	54.7213	30.8415	3.31241	50.215	48.7178	5.31506	29.236
chr1:192669702:192670405	chr1	192669702	192670405	.	704	-1.52241	5.4568	0.000129579	0.00378942	105.71	38.0104	15.3911	60.6402	8.85076	15.9731	86.4854	38.2832	12.499	150.156	53.9921	21.8624	86.1366	12.5721	22.6891	122.849	54.3795	17.7542
chr6:2839247:2840718	chr6	2839247	2840718	.	1472	-3.50149	4.95587	9.88533e-09	2.14534e-06	83.8387	5.43006	36.5539	36.5396	7.74442	25.557	40.1221	2.77862	28.1227	56.9556	3.6889	24.8328	24.8231	5.26115	17.3621	27.2569	1.88765	19.1051
chr2:57408550:57409689	chr2	57408550	57409689	.	1140	-3.73923	4.86371	1.88347e-08	3.82458e-06	64.7016	6.78758	41.3636	32.6524	1.10635	26.6219	27.6397	2.46988	44.788	56.7558	5.95401	36.2838	28.6424	0.970479	23.3525	24.2453	2.16656	39.2877
chr4:11627438:11628300	chr4	11627438	11628300	.	863	-4.49294	4.51315	1.89002e-08	3.82458e-06	43.7419	0	9.61944	36.5396	0	15.9731	44.5801	3.08735	36.4553	50.6859	0	11.1465	42.3402	0	18.5089	51.6572	3.57747	42.2426
chr4:168998083:168999459	chr4	168998083	168999459	.	1377	-2.05955	5.36355	7.26828e-07	6.99306e-05	79.2822	14.9327	20.2008	101.067	16.5952	21.2975	67.7618	25.0076	10.4158	57.5761	10.8443	14.6702	73.3965	12.0517	15.4666	49.2097	18.1609	7.56413
chr1:27316993:27318266	chr1	27316993	27318266	.	1274	-1.87801	6.08095	2.75822e-08	5.1697e-06	117.556	29.8653	66.3741	95.6249	18.8079	72.4116	89.1602	31.491	73.9522	92.2735	23.4422	52.099	75.0588	14.7629	56.838	69.9845	24.7182	58.0473
chr9:132268940:132269554	chr9	132268940	132269554	.	615	-3.14756	5.02512	2.85603e-08	5.31848e-06	40.0968	9.50261	43.2875	56.753	5.53173	47.9194	50.8213	3.70482	23.4356	65.198	15.4514	70.3861	92.2812	8.99468	77.9177	82.6363	6.02411	38.1066
chr12:110388800:110389963	chr12	110388800	110389963	.	1164	-2.38661	5.57766	3.22196e-08	5.81242e-06	70.1693	17.6477	59.6405	73.0792	4.42538	53.2438	69.545	16.6717	51.5582	60.2829	15.1613	51.2375	62.7828	3.80187	45.7421	59.7466	14.3228	44.294
chr12:104665381:104666539	chr12	104665381	104666539	.	1159	-2.30188	6.1706	1.28056e-10	6.16036e-08	170.411	27.1503	35.5919	143.826	25.4459	47.9194	103.426	30.5648	49.9959	147.033	23.4256	30.7092	124.095	21.9551	41.3455	89.2372	26.3717	43.1371
chr11:110227618:110228923	chr11	110227618	110228923	.	1306	-1.43538	7.15989	3.5785e-08	6.25999e-06	193.193	63.8032	162.568	181.143	53.1046	201.262	199.719	88.9158	129.677	147.928	48.8539	124.478	138.701	40.662	154.105	152.924	68.0825	99.2931
chr12:65828486:65829798	chr12	65828486	65829798	.	1313	-1.80475	5.13728	0.000180524	0.00487889	63.7903	38.0104	16.353	83.9633	8.85076	1.06488	65.9786	16.9804	9.37423	48.5836	28.9493	12.4547	63.9477	6.74087	0.811025	50.2503	12.9326	7.13955
chr2:227049941:227050942	chr2	227049941	227050942	.	1002	-1.62044	6.54639	3.79869e-08	6.52652e-06	126.669	39.3679	124.091	97.9572	36.5094	127.785	97.1847	30.8735	146.863	126.416	39.2894	123.843	97.7617	36.4365	127.53	96.9907	30.8119	146.57
chr2:226928266:226928965	chr2	226928266	226928965	.	700	-1.79255	6.20609	3.91593e-08	6.67298e-06	124.847	29.8653	80.8033	114.283	30.9777	47.9194	100.751	35.5046	84.8888	178.352	42.6648	115.433	163.262	44.2538	68.4563	143.93	50.7208	121.27
chr17:74597673:74598284	chr17	74597673	74598284	.	612	-1.43953	6.38399	6.81933e-07	6.6116e-05	136.694	39.3679	48.0972	164.039	44.2538	57.5033	133.74	70.0829	43.2256	223.355	64.3267	78.5902	268.038	72.3102	93.9596	218.53	114.515	70.6301
chr8:55062908:55064795	chr8	55062908	55064795	.	1888	-2.32632	6.00627	4.17499e-10	1.5254e-07	97.508	23.0778	35.5919	151.6	17.7015	34.076	129.282	31.1823	43.7464	51.6462	12.2234	18.8516	80.2968	9.37581	18.0487	68.4758	16.516	23.1708
chrX:13709873:13711808	chrX	13709873	13711808	.	1936	-2.64107	5.15032	4.59408e-08	7.49173e-06	54.6774	8.14509	46.1733	59.0853	5.53173	30.8814	53.4961	11.1145	36.4553	28.2425	4.20718	23.8498	30.5193	2.8573	15.9511	27.6323	5.74095	18.8302
chr12:49897343:49898229	chr12	49897343	49898229	.	887	-3.35376	5.11372	4.68131e-08	7.59108e-06	60.1451	13.5752	53.8688	53.6432	0	27.6868	49.9297	4.3223	35.4137	67.8074	15.3046	60.7315	60.4771	0	31.2139	56.2906	4.87294	39.9253
chr9:111872488:111873621	chr9	111872488	111873621	.	1134	-1.9822	5.93397	4.81343e-08	7.71861e-06	61.0564	14.9327	87.5369	90.1828	21.0206	73.4764	98.0763	24.3901	65.6196	53.8417	13.1681	77.193	79.5263	18.5367	64.794	86.487	21.508	57.8656
chr4:24599505:24600047	chr4	24599505	24600047	.	543	-3.72018	4.55259	6.00068e-08	9.46468e-06	42.8306	0	19.2389	55.9755	1.10635	21.2975	37.4473	5.86597	13.5405	78.8778	0	35.4307	103.086	2.03747	39.2219	68.9637	10.8029	24.9366
chr21:16272486:16274837	chr21	16272486	16274837	.	2352	-2.66593	5.32773	6.26746e-08	9.72603e-06	67.4355	12.2176	56.7547	44.314	13.2761	35.1409	90.0518	8.02712	22.394	28.6715	5.19457	24.1304	18.841	5.64462	14.9409	38.2874	3.41289	9.52125
chr17:2361956:2363065	chr17	2361956	2363065	.	1110	-2.44359	5.34071	7.69958e-08	1.1575e-05	63.7903	8.14509	57.7166	60.6402	11.0635	45.7897	65.087	13.5844	26.0395	57.4687	7.33792	51.9969	54.6308	9.96708	41.2519	58.6369	12.2382	23.459
chr7:129550909:129551841	chr7	129550909	129551841	.	933	-5.38984	3.95195	8.65623e-08	1.25572e-05	18.2258	1.35752	15.3911	35.7621	0	13.8434	34.7725	0.617471	6.77027	19.5346	1.455	16.4964	38.3303	0	14.8375	37.2696	0.661812	7.25646
chr17:17290419:17291078	chr17	17290419	17291078	.	660	-2.15511	4.67383	2.81528e-05	0.0012003	54.6774	10.8601	1.92389	60.6402	11.0635	7.45413	45.4717	13.2756	10.4158	82.8446	16.4547	2.91498	91.879	16.7628	11.2941	68.8966	20.1146	15.7815
chr10:32170402:32170981	chr10	32170402	32170981	.	580	-4.45162	4.43888	8.94767e-08	1.28195e-05	30.0726	5.43006	22.1247	24.878	0	28.7516	42.7969	0.617471	27.6019	51.8493	9.36217	38.146	42.8931	0	49.5718	73.7878	1.0646	47.5895
chr1:108759229:108760842	chr1	108759229	108760842	.	1614	-1.39633	6.06858	1.34469e-05	0.000679741	159.476	52.9431	39.4397	69.192	38.7221	36.2058	123.041	42.6055	30.2058	98.8078	32.8024	24.436	42.8699	23.9914	22.4323	76.2337	26.3975	18.7149
chr17:74049619:74050769	chr17	74049619	74050769	.	1151	-2.41681	5.26175	8.97154e-08	1.28195e-05	55.5887	12.2176	37.5158	80.0761	12.1698	24.4921	57.0626	11.7319	40.1009	48.296	10.6148	32.5941	69.5709	10.5732	21.279	49.5765	10.1928	34.84
chr7:129536239:129537126	chr7	129536239	129537126	.	888	-2.97842	5.39463	1.04066e-07	1.46525e-05	41.9193	0	87.5369	42.7591	12.1698	70.2818	35.6641	3.70482	70.8275	47.2065	0	98.5775	48.1521	13.7047	79.1462	40.1623	4.1721	79.7607
chr20:50252457:50253156	chr20	50252457	50253156	.	700	-5.98103	4.09308	1.11243e-07	1.55463e-05	12.7581	0	27.8964	18.6585	1.10635	34.076	27.6397	0	19.2692	18.2258	0	39.8519	26.655	1.58049	48.68	39.4853	0	27.5275
chr10:54202467:54204594	chr10	54202467	54204594	.	2128	-1.32919	7.5046	4.09769e-08	6.84626e-06	285.234	124.891	162.568	307.865	84.0823	102.228	291.554	138.931	122.907	134.038	58.6896	76.3949	144.674	39.5123	48.0395	137.008	65.2871	57.7568
chr21:41004392:41006249	chr21	41004392	41006249	.	1858	-1.28241	7.14367	1.23402e-07	1.66933e-05	184.992	73.3058	191.427	157.82	79.6569	166.121	172.971	61.7471	171.34	99.5651	39.4542	103.028	84.9407	42.8724	89.4083	93.0952	33.2331	92.2175
chr1:192947060:192949294	chr1	192947060	192949294	.	2235	-2.02151	6.10254	1.2966e-07	1.72567e-05	91.129	10.8601	147.177	76.1889	29.8713	92.6442	74.8946	18.5241	64.578	40.7736	4.85912	65.8512	34.089	13.3652	41.4515	33.5099	8.2882	28.894
chr3:14493686:14494951	chr3	14493686	14494951	.	1266	-1.74102	6.15774	1.29736e-07	1.72567e-05	76.5484	28.5078	82.7271	86.2956	25.4459	99.0335	126.608	31.1823	72.9106	60.4647	22.518	65.3453	68.164	20.0995	78.2255	100.006	24.6305	57.5914
chr6:84846778:84847167	chr6	84846778	84847167	.	390	-4.16239	4.31542	1.09424e-06	9.68423e-05	26.4274	0	0.961944	62.9725	9.95711	3.19463	59.7374	0.308735	2.60395	67.7626	0	2.46652	161.468	25.5311	8.19135	153.173	0.791629	6.6768
chr20:52755593:52758016	chr20	52755593	52758016	.	2424	-1.12972	7.92852	1.38472e-07	1.82505e-05	304.371	116.746	259.725	259.664	144.931	338.631	275.505	122.259	356.741	125.566	48.1627	107.147	107.122	59.7901	139.699	113.657	50.437	147.171
chr18:13710263:13711057	chr18	13710263	13711057	.	795	-1.46528	6.6406	1.57206e-07	2.01014e-05	134.871	57.0156	92.3466	116.616	39.8284	100.098	170.296	54.6462	118.219	169.649	71.7178	116.159	146.686	50.0987	125.91	214.209	68.7373	148.704
chr3:24000679:24001287	chr3	24000679	24001287	.	609	-1.35973	7.02845	1.71642e-07	2.14471e-05	141.25	70.5908	175.074	158.597	50.8919	223.624	133.74	50.6326	157.799	231.938	115.913	287.477	260.423	83.5663	367.199	219.607	83.1406	259.112
chr5:34686672:34687981	chr5	34686672	34687981	.	1310	-1.79434	6.08284	1.75553e-07	2.17475e-05	79.2822	36.6529	60.6024	87.8505	19.9142	81.9954	134.632	30.2561	65.6196	60.5208	27.9793	46.2614	67.0614	15.2017	62.5919	102.772	23.0962	50.0913
chr6:16680927:16682189	chr6	16680927	16682189	.	1263	-1.49368	6.59076	1.74832e-07	2.17475e-05	111.177	33.9379	101.966	129.055	35.4031	144.823	109.667	50.3239	136.447	88.0264	26.8708	80.7332	102.181	28.0309	114.666	86.8306	39.8447	108.034
chr18:8116043:8117141	chr18	8116043	8117141	.	1099	-1.17013	5.90231	0.000169759	0.00464447	94.7742	48.8706	35.5919	107.286	56.4236	23.4273	97.1847	31.7997	30.7266	86.2367	44.4682	32.3857	97.6219	51.3409	21.3169	88.4301	28.9352	27.9587
chr10:51059884:51060591	chr10	51059884	51060591	.	708	-3.38255	4.62302	1.91671e-07	2.34523e-05	38.2742	5.43006	32.7061	34.2073	1.10635	18.1029	32.0977	3.39609	41.6632	54.0596	7.66958	46.195	48.3154	1.56264	25.5691	45.3357	4.79674	58.8464
chr13:44794315:44794926	chr13	44794315	44794926	.	612	-3.16221	4.15564	7.21952e-06	0.00042183	31.8952	1.35752	4.80972	49.756	3.31904	3.19463	44.5801	7.10091	0.52079	52.1163	2.21816	7.85902	81.3007	5.42326	5.21998	72.8433	11.6028	0.850965
chr12:76326884:76327798	chr12	76326884	76327798	.	915	-2.84658	4.76229	1.91753e-07	2.34523e-05	60.1451	6.78758	22.1247	38.0945	5.53173	27.6868	42.7969	6.79218	21.3524	65.7324	7.41812	24.18	41.6333	6.0456	30.2588	46.7726	7.42315	23.336
chr8:102615998:102617197	chr8	102615998	102617197	.	1200	-1.87294	5.09547	0.000118586	0.00352297	88.3951	13.5752	9.61944	68.4145	18.8079	21.2975	50.8213	22.2289	1.56237	73.6626	11.3126	8.0162	57.0121	15.6732	17.7479	42.3511	18.5241	1.30198
chr2:9748024:9748782	chr2	9748024	9748782	.	759	-3.09813	4.92423	2.01036e-07	2.42791e-05	31.8952	10.8601	17.315	56.753	5.53173	25.557	58.8458	3.39609	48.4335	42.0226	14.3085	22.8129	74.7733	7.28818	33.672	77.5306	4.47443	63.8123
chr12:65019158:65019888	chr12	65019158	65019888	.	731	-3.28582	4.57386	2.11758e-07	2.505e-05	52.8548	8.14509	17.315	30.3201	3.31904	24.4921	45.4717	3.08735	17.1861	72.3048	11.1424	23.6867	41.4775	4.54041	33.505	62.2048	4.22347	23.5104
chr17:80225258:80226047	chr17	80225258	80226047	.	790	-2.95543	4.66718	2.34974e-07	2.74587e-05	45.5645	5.43006	26.9344	40.4268	4.42538	25.557	33.8809	5.2485	27.6019	57.6766	6.8735	34.0942	51.1731	5.60175	32.3507	42.8872	6.64367	34.9391
chr3:42170722:42171950	chr3	42170722	42171950	.	1229	-2.14654	4.84511	1.06998e-05	0.000569812	59.2339	19.0052	14.4292	61.4176	7.74442	5.32438	55.2794	13.2756	9.89502	48.1968	15.464	11.7406	49.9736	6.3014	4.33229	44.9791	10.802	8.05127
chr22:36138156:36139515	chr22	36138156	36139515	.	1360	-1.29285	7.08126	2.7169e-07	3.11193e-05	164.032	82.8084	172.188	194.359	49.7856	160.796	161.38	78.1101	141.655	120.612	60.8886	126.609	142.911	36.607	118.233	118.662	57.4339	104.158
chr6:20266867:20267810	chr6	20266867	20267810	.	944	-1.43011	6.11657	1.27705e-05	0.000652401	131.226	58.3732	32.7061	83.9633	30.9777	55.3735	148.006	45.6928	26.0395	139.01	61.836	34.6463	88.9442	32.8153	58.6584	156.786	48.4034	27.5842
chr20:45832711:45833874	chr20	45832711	45833874	.	1164	-1.7302	5.9851	1.44686e-06	0.000117972	89.3064	25.7928	18.2769	125.168	46.4665	27.6868	136.415	33.3434	53.1206	76.7237	22.1588	15.7018	107.532	39.9197	23.7859	117.195	28.6456	45.6363
chr5:92521761:92522543	chr5	92521761	92522543	.	783	-2.2504	5.52709	2.88059e-07	3.27343e-05	53.7661	24.4353	42.3255	62.195	14.3825	47.9194	88.2686	8.64459	59.8909	68.6668	31.2072	54.0556	79.4317	18.3684	61.1998	112.731	11.0403	76.489
chr17:19112771:19113910	chr17	19112771	19113910	.	1140	-3.5802	4.3115	2.9879e-07	3.38206e-05	26.4274	4.07255	14.4292	47.4237	3.31904	10.6488	38.3389	2.46988	17.7069	23.1819	3.57241	12.6572	41.5997	2.91144	9.34102	33.6306	2.16656	15.5323
chr15:30135854:30137248	chr15	30135854	30137248	.	1395	-1.25219	5.49743	0.000425819	0.00934666	91.129	43.4405	15.3911	78.5212	25.4459	15.9731	65.087	30.8735	27.6019	65.3255	31.1401	11.033	56.2876	18.2408	11.4503	46.6573	22.1316	19.7863
chr7:151755095:151756222	chr7	151755095	151756222	.	1128	-3.64318	4.50994	3.65031e-07	3.99101e-05	35.5403	0	18.2769	39.6493	2.21269	44.7248	17.832	3.39609	29.6851	31.5074	0	16.2029	35.1501	1.96161	39.6496	15.8086	3.01072	26.3165
chr2:121044491:121045184	chr2	121044491	121045184	.	694	-3.29399	4.42236	1.49105e-06	0.000120217	60.1451	0	8.65749	58.3078	4.42538	1.06488	33.8809	8.02712	4.16632	86.6645	0	12.4748	84.0171	6.37663	1.5344	48.8197	11.5665	6.00335
chr12:6037703:6039298	chr12	6037703	6039298	.	1596	-0.827601	7.51356	0.000134746	0.0038893	304.371	196.84	142.368	232.454	119.485	128.85	267.481	140.166	100.513	190.709	123.333	89.2028	145.648	74.8655	80.7331	167.594	87.8232	62.9778
chr4:11749651:11750792	chr4	11749651	11750792	.	1142	-1.87826	6.0543	3.67944e-07	3.99981e-05	92.0403	24.4353	94.2705	58.3078	34.2967	76.6711	98.9679	13.8931	92.1799	80.5957	21.3969	82.5486	51.0577	30.0321	67.1375	86.6619	12.1656	80.7179
chr12:49900763:49901453	chr12	49900763	49901453	.	691	-3.08099	5.3275	3.90541e-07	4.20059e-05	38.2742	9.50261	51.9449	44.314	9.95711	85.1901	41.0137	0.617471	67.7027	55.3896	13.752	75.1736	64.1302	14.4097	123.285	59.3541	0.89359	97.9779
chr13:97918913:97920130	chr13	97918913	97920130	.	1218	-1.76162	5.16503	2.91917e-05	0.00123574	89.3064	10.8601	18.2769	63.7499	19.9142	10.6488	53.4961	26.5512	15.6237	73.3222	8.91636	15.0057	52.3398	16.3499	8.74282	43.9213	21.7991	12.8273
chr18:77121829:77122366	chr18	77121829	77122366	.	538	-2.40072	5.29599	3.30326e-07	3.66712e-05	86.5726	13.5752	13.4672	67.6371	6.63807	8.51901	91.8351	22.2289	28.1227	160.916	25.2326	25.032	125.72	12.3384	15.8346	170.697	41.3177	52.2726
chr2:39174134:39174941	chr2	39174134	39174941	.	808	-2.22545	5.51091	4.90861e-07	5.07821e-05	62.879	23.0778	29.8202	79.2987	4.42538	54.3087	70.4366	17.2892	54.683	77.8206	28.5616	36.9062	98.1419	5.47696	67.2137	87.174	21.3975	67.677
chr3:37095664:37096891	chr3	37095664	37096891	.	1228	-1.84334	5.76387	5.47425e-07	5.62309e-05	61.0564	25.7928	66.3741	79.2987	25.4459	44.7248	105.209	19.1416	48.9543	49.7202	21.0039	54.0506	64.5755	20.7215	36.4208	85.6752	15.5876	39.8651
chr12:76288837:76289927	chr12	76288837	76289927	.	1091	-2.12248	5.51174	5.73681e-07	5.85114e-05	71.0806	20.3627	52.9069	50.5335	5.53173	44.7248	77.5694	18.2154	55.7246	65.1518	18.6643	48.4939	46.3185	5.07033	40.9943	71.0994	16.696	51.0766
chr12:38676475:38677217	chr12	38676475	38677217	.	743	-2.63356	4.99573	6.35559e-07	6.26101e-05	43.7419	9.50261	60.6024	31.0975	5.53173	41.5302	47.2549	5.55724	30.2058	58.872	12.7895	81.5645	41.854	7.44513	55.8952	63.6002	7.47946	40.6539
chr12:132816980:132819229	chr12	132816980	132819229	.	2250	-3.17858	6.63552	1.38323e-15	1.08008e-11	224.177	23.0778	96.1944	143.826	17.7015	63.8926	210.418	22.2289	79.6809	99.6344	10.2568	42.753	63.9227	7.86735	28.3967	93.5192	9.87953	35.4137
chr14:21295876:21297205	chr14	21295876	21297205	.	1330	-0.760827	7.20479	0.000353943	0.0081081	195.016	142.539	116.395	206.798	118.379	101.163	235.383	117.319	82.2849	146.629	107.172	87.5152	155.488	89.0068	76.0626	176.98	88.2101	61.8683
chr7:47322928:47323501	chr7	47322928	47323501	.	574	-3.39815	4.29107	6.826e-07	6.6116e-05	44.6532	4.07255	17.315	27.2103	2.21269	17.038	38.3389	3.70482	9.37423	77.7931	7.09503	30.1655	47.4048	3.85486	29.683	66.7925	6.4544	16.3314
chr8:6506425:6507091	chr8	6506425	6507091	.	667	-0.610426	10.0216	4.92865e-05	0.00182152	1307.7	790.074	754.164	1370.62	935.968	964.778	1472.93	989.188	756.188	1960.57	1184.52	1130.68	2054.91	1403.25	1446.44	2208.29	1483.04	1133.71
chr7:36329489:36330605	chr7	36329489	36330605	.	1117	-1.73362	5.99197	6.99874e-07	6.75624e-05	92.9516	10.8601	61.5644	97.1797	32.084	63.8926	98.9679	37.9745	62.4948	83.2154	9.72258	55.1158	87.0007	28.7234	57.2001	88.6015	33.9968	55.9488
chr8:102170879:102172199	chr8	102170879	102172199	.	1321	-0.654628	8.41826	0.000266582	0.00653003	472.048	321.731	252.029	434.588	244.502	282.192	508.213	330.038	220.294	357.342	243.551	190.787	328.984	185.089	213.62	384.719	249.84	166.763
chr10:121282313:121283436	chr10	121282313	121283436	.	1124	-1.01991	7.77222	7.37609e-07	7.04979e-05	292.524	146.612	173.15	302.423	146.038	228.948	306.711	151.28	206.233	260.253	130.437	154.048	269.06	129.927	203.691	272.875	134.591	183.481
chr2:71758913:71759325	chr2	71758913	71759325	.	413	-2.11277	5.49967	1.23997e-07	1.66933e-05	67.4355	16.2902	29.8202	78.5212	19.9142	23.4273	114.125	22.2289	21.8732	163.282	39.4435	72.204	190.124	48.2185	56.7246	276.332	53.8231	52.9617
chr17:72413071:72414290	chr17	72413071	72414290	.	1220	-1.27054	7.17107	4.56558e-07	4.77467e-05	226	73.3058	126.015	260.442	122.804	108.617	201.502	89.2245	76.0354	185.246	60.0867	103.291	213.477	100.659	89.0306	165.166	73.1349	62.3241
chr6:3061692:3062619	chr6	3061692	3062619	.	928	-1.32608	6.77427	7.69028e-07	7.30171e-05	174.968	76.0209	118.319	146.158	67.4871	108.617	155.139	50.9413	75.5146	188.543	81.919	127.499	157.498	72.7231	117.045	167.175	54.8937	81.3735
chr4:30950140:30950772	chr4	30950140	30950772	.	633	-1.74731	5.91657	8.28159e-07	7.73591e-05	110.266	32.5804	75.0316	87.8505	32.084	55.3735	75.7862	20.3765	42.184	174.196	51.4698	118.533	138.784	50.6857	87.478	119.725	32.1904	66.6414
chr19:33531825:33533179	chr19	33531825	33533179	.	1355	-2.62445	4.93722	8.38628e-07	7.78306e-05	34.629	8.14509	28.8583	38.8719	2.21269	50.0492	50.8213	8.33586	40.1009	25.5565	6.01114	21.2976	28.6877	1.63298	36.9367	37.5065	6.15192	29.5947
chr14:23158451:23159111	chr14	23158451	23159111	.	661	-1.41973	6.50594	8.54488e-07	7.87986e-05	123.024	51.5856	83.6891	135.274	45.3602	126.72	128.391	47.854	63.5364	186.118	78.0417	126.61	204.651	68.6236	191.71	194.237	72.3964	96.1217
chr1:199824039:199825455	chr1	199824039	199825455	.	1417	-1.50042	5.94363	2.38377e-06	0.000172444	108.444	29.8653	36.5539	117.393	32.084	40.4653	92.7267	46.619	35.4137	76.5304	21.0765	25.7967	82.8462	22.6422	28.557	65.4387	32.8998	24.9921
chr4:22502337:22503673	chr4	22502337	22503673	.	1337	-2.06212	5.42557	1.02688e-06	9.17643e-05	43.7419	9.50261	51.9449	59.0853	19.9142	60.6979	66.8702	11.7319	49.9959	32.7165	7.10741	38.8519	44.1924	14.8947	45.3986	50.0151	8.77483	37.3941
chr8:23213324:23214091	chr8	23213324	23214091	.	768	-1.69091	5.85377	1.02363e-06	9.17643e-05	91.129	17.6477	49.0591	75.4115	26.5523	52.1789	89.1602	31.491	72.9106	118.658	22.9788	63.8791	98.192	34.5733	67.9413	116.094	41.0039	94.9357
chr20:14859610:14860508	chr20	14859610	14860508	.	899	-2.65305	5.04783	1.08857e-06	9.66785e-05	29.1613	1.35752	49.0591	40.4268	2.21269	52.1789	57.0626	11.4232	40.6216	32.4375	1.51003	54.5708	44.9686	2.46128	58.0411	63.4734	12.7066	45.1854
chr14:36786580:36787433	chr14	36786580	36787433	.	854	-1.43971	6.23603	1.09713e-06	9.68423e-05	110.266	44.798	73.1077	103.399	45.3602	59.6331	121.258	35.5046	71.8691	129.117	52.4567	85.6062	121.076	53.115	69.8279	141.988	41.5744	84.1558
chr2:55342376:55343648	chr2	55342376	55343648	.	1273	-1.80269	5.69658	1.11061e-06	9.77339e-05	79.2822	27.1503	55.7927	99.5121	18.8079	54.3087	54.3878	21.6115	42.7048	62.2798	21.3278	43.8277	78.1713	14.7745	42.662	42.7241	16.9768	33.5466
chr17:73155164:73156093	chr17	73155164	73156093	.	930	-2.07252	5.6686	1.1263e-06	9.85138e-05	112.089	16.2902	79.8413	60.6402	9.95711	26.6219	69.545	26.5512	42.184	120.525	17.5163	85.8509	65.2045	10.7066	28.6257	74.7796	28.5497	45.3592
chr17:79856008:79857260	chr17	79856008	79857260	.	1253	-1.58246	6.17863	1.14043e-06	9.94313e-05	82.9274	31.2229	108.7	89.4054	40.9348	69.2169	101.643	22.8464	91.6591	66.1831	24.9185	86.7515	71.353	32.6694	55.241	81.1195	18.2334	73.1517
chr11:18007255:18008653	chr11	18007255	18008653	.	1399	-2.21321	5.50959	1.15041e-06	9.97163e-05	46.4758	17.6477	52.9069	65.3048	23.2333	61.7628	92.7267	7.71839	30.7266	33.2207	12.6145	37.8177	46.6796	16.607	44.1478	66.2807	5.51707	21.9633
chr5:145354512:145355594	chr5	145354512	145355594	.	1083	-1.79024	5.68286	1.15905e-06	0.000100165	79.2822	17.6477	40.4016	83.9633	35.4031	45.7897	80.2442	18.8329	47.3919	73.2061	16.2952	37.3053	77.5284	32.6898	42.2804	74.0944	17.3895	43.7599
chr8:6416088:6417922	chr8	6416088	6417922	.	1835	-2.03982	5.44548	1.23139e-06	0.000105321	60.1451	10.8601	71.1838	63.7499	7.74442	48.9843	49.0381	19.4503	46.8711	32.7766	5.91832	38.7923	34.7411	4.22039	26.6944	26.7238	10.5996	25.5429
chr8:126153544:126154946	chr8	126153544	126154946	.	1403	-1.96552	5.13068	3.3397e-06	0.000227938	77.4597	16.2902	16.353	62.195	14.3825	19.1678	61.5206	19.4503	15.1029	55.21	11.611	11.6558	44.33	10.2512	13.662	43.8493	13.8634	10.7647
chr22:37585168:37586639	chr22	37585168	37586639	.	1472	-1.53982	5.19439	0.000340865	0.00787729	66.5242	32.5804	17.315	50.5335	6.63807	10.6488	87.377	29.3299	15.1029	45.1931	22.1334	11.7629	34.3298	4.50956	7.23421	59.3594	19.9252	10.2601
chr6:31877930:31878749	chr6	31877930	31878749	.	820	-1.38166	6.2187	8.55254e-06	0.000484565	130.314	57.0156	70.2219	133.719	49.7856	34.076	109.667	39.8269	33.3306	158.92	69.5313	85.6364	163.072	60.7141	41.5561	133.74	48.5694	40.6471
chr4:11497834:11498485	chr4	11497834	11498485	.	652	-4.96918	4.59161	5.05707e-10	1.80207e-07	74.7258	0	13.4672	59.0853	0	5.32438	41.0137	3.08735	6.77027	114.61	0	20.6552	90.6216	0	8.16623	62.9045	4.73521	10.3839
chr1:59764322:59765793	chr1	59764322	59765793	.	1472	-2.05494	5.24976	1.07227e-05	0.000569979	112.089	10.8601	17.315	73.8566	33.1904	11.7136	39.2305	12.0407	19.2692	76.1472	7.3778	11.7629	50.1743	22.5478	7.95763	26.6512	8.17981	13.0905
chr18:29951858:29952816	chr18	29951858	29952816	.	959	-1.29003	5.78888	9.37989e-05	0.00295247	80.1935	28.5078	33.668	100.289	55.3173	22.3624	98.0763	31.491	34.3722	83.622	29.7266	35.1074	104.577	57.6823	23.3185	102.269	32.8373	35.8417
chr22:30014014:30014409	chr22	30014014	30014409	.	396	-1.67411	5.38157	2.11114e-05	0.000976538	91.129	14.9327	18.2769	69.9694	36.5094	25.557	66.8702	20.3765	18.7485	230.124	37.7088	46.1539	176.69	92.1955	64.5379	168.864	51.4559	47.3446
chr1:23435438:23436345	chr1	23435438	23436345	.	908	-2.84208	4.67564	1.28174e-06	0.000107547	41.9193	1.35752	25.9725	32.6524	6.63807	25.557	32.0977	5.55724	43.2256	46.1667	1.49506	28.604	35.9608	7.31065	28.1465	35.3499	6.12031	47.6053
chr3:32484348:32485416	chr3	32484348	32485416	.	1069	-1.6987	5.77669	1.3019e-06	0.000108922	55.5887	20.3627	66.3741	81.631	23.2333	67.0872	72.2198	20.994	71.8691	52.0006	19.0484	62.0899	76.362	21.7336	62.757	67.5583	19.6389	67.2302
chr8:130722303:130723321	chr8	130722303	130723321	.	1019	-0.996082	7.85993	1.32418e-06	0.000110147	307.105	143.897	233.752	256.555	171.484	259.83	324.543	132.139	248.417	301.379	141.214	229.394	251.771	168.286	254.985	318.492	129.675	243.785
chr14:31500490:31501697	chr14	31500490	31501697	.	1208	-1.63832	5.99542	1.37841e-06	0.000113676	111.177	23.0778	54.8308	80.0761	48.6792	50.0492	106.992	25.625	60.4117	92.0343	19.1041	45.3897	66.2882	40.2974	41.4314	88.5698	21.2128	50.0097
chr8:62679636:62680156	chr8	62679636	62680156	.	521	-1.76611	5.5565	3.62174e-05	0.0014419	88.3951	12.2176	16.353	81.631	43.1475	41.5302	96.2931	22.8464	8.85344	169.664	23.4504	31.3878	156.681	82.8167	79.7124	184.824	43.8511	16.9932
chr4:11629564:11630361	chr4	11629564	11630361	.	798	-2.58928	5.17531	1.46131e-06	0.000118481	63.7903	9.50261	45.2113	73.0792	0	25.557	51.7129	16.9804	24.9979	79.9377	11.908	56.6558	91.5779	0	32.0263	64.8032	21.2788	31.3257
chr7:23388897:23389578	chr7	23388897	23389578	.	682	-2.23895	5.35055	1.51509e-06	0.000121477	45.5645	14.9327	48.0972	52.0883	2.21269	71.3467	51.7129	12.9669	54.683	66.8101	21.8954	70.5237	76.3759	3.24442	104.614	75.8254	19.013	80.1803
chr10:101736604:101737317	chr10	101736604	101737317	.	714	-1.18101	7.07086	1.53097e-06	0.00012241	179.524	77.3784	183.731	171.036	90.7203	118.201	170.296	64.8344	141.134	251.434	108.373	257.327	239.547	127.059	165.548	238.51	90.8045	197.667
chr8:143315938:143317458	chr8	143315938	143317458	.	1521	-1.08008	7.22937	1.55442e-06	0.000123941	195.927	77.3784	168.34	167.927	91.8267	178.899	188.128	90.1507	178.11	128.815	50.8734	110.677	110.405	60.3726	117.619	123.687	59.2707	117.101
chr19:9238885:9239521	chr19	9238885	9239521	.	637	-3.52175	4.4678	1.56344e-06	0.000124317	38.2742	1.35752	3.84777	36.5396	0	26.6219	43.6885	5.86597	28.1227	60.0851	2.13111	6.04046	57.362	0	41.7926	68.5848	9.20875	44.1486
chr12:113643453:113644384	chr12	113643453	113644384	.	932	-3.26984	5.25771	3.78706e-10	1.43828e-07	71.9919	6.78758	21.1628	106.509	13.2761	21.2975	61.5206	6.17471	21.8732	77.2445	7.28281	22.7068	114.28	14.2448	22.8514	66.0092	6.62522	23.4691
chr12:113668224:113670067	chr12	113668224	113670067	.	1844	-1.78926	5.71738	2.39361e-06	0.000172723	75.6371	24.4353	35.5919	111.174	13.2761	34.076	104.317	40.7531	19.79	41.0179	13.2512	19.3015	60.2894	7.19965	18.4794	56.5713	22.1004	10.7321
chr6:8083254:8084192	chr6	8083254	8084192	.	939	-1.13025	7.07006	1.64261e-06	0.000128489	149.452	74.6633	180.845	145.381	59.7427	171.445	165.838	74.714	173.423	159.16	79.5137	192.594	154.825	63.6237	182.583	176.611	79.5676	184.689
chr12:104673869:104675014	chr12	104673869	104675014	.	1146	-1.03481	7.6637	1.70661e-06	0.000132775	328.976	131.679	209.704	266.661	143.825	172.51	221.117	124.42	212.482	287.064	114.903	182.988	232.689	125.502	150.532	192.947	108.569	185.412
chr13:20368444:20369191	chr13	20368444	20369191	.	748	-5.29506	3.715	1.73675e-06	0.000134559	26.4274	1.35752	1.92389	18.6585	0	14.9083	38.3389	0.617471	4.16632	35.3308	1.81486	2.57204	24.9445	0	19.9308	51.2552	0.825496	5.56995
chr4:26569817:26570876	chr4	26569817	26570876	.	1060	-1.27888	6.74915	1.76329e-06	0.000136085	129.403	43.4405	119.281	187.363	61.9554	118.201	118.583	69.7742	105.72	122.078	40.9816	112.529	176.757	58.4484	111.511	111.871	65.8247	99.7363
chr9:78981138:78981643	chr9	78981138	78981643	.	506	-4.6632	3.79817	1.81241e-06	0.000139131	28.25	0	14.4292	24.1006	2.21269	4.2595	33.8809	0.926206	4.68711	55.83	0	28.5161	47.6296	4.37291	8.41799	66.9583	1.83045	9.26307
chr5:76101591:76102555	chr5	76101591	76102555	.	965	-1.37917	6.73629	1.92313e-06	0.000145693	140.339	58.3732	105.814	122.835	78.5505	124.59	203.285	46.3103	67.7027	145.429	60.4903	109.652	127.29	81.3995	129.109	210.658	47.99	70.1583
chr4:146875580:146876834	chr4	146875580	146876834	.	1255	-1.26008	6.68828	1.98751e-06	0.000149395	141.25	65.1607	100.042	150.823	44.2538	126.72	133.74	66.3781	86.4512	112.55	51.9209	79.7148	120.178	35.262	100.972	106.566	52.8909	68.8854
chr17:4232836:4233789	chr17	4232836	4233789	.	954	-2.55158	6.11626	8.53169e-12	7.24291e-09	136.694	20.3627	57.7166	115.061	19.9142	54.3087	138.198	24.3901	44.2672	143.285	21.3446	60.4996	120.609	20.8744	56.9273	144.862	25.5661	46.4017
chr6:1325521:1326336	chr6	1325521	1326336	.	816	-2.78219	4.63287	1.98322e-06	0.000149395	22.7823	4.07255	26.9344	34.9847	2.21269	28.7516	51.7129	7.40965	30.2058	27.9194	4.99087	33.0079	42.8734	2.71163	35.2349	63.3737	9.08045	37.017
chr17:40418421:40419642	chr17	40418421	40419642	.	1222	-1.35508	6.34091	2.07713e-06	0.000154921	142.161	42.083	72.1458	92.5151	43.1475	81.9954	114.125	49.0889	78.6393	116.335	34.4378	59.0391	75.7079	35.3089	67.0994	93.3921	40.171	64.353
chr6:73933905:73934491	chr6	73933905	73934491	.	587	-2.31396	5.07567	2.12268e-06	0.000157504	42.8306	5.43006	25.0105	69.9694	12.1698	45.7897	34.7725	10.8057	42.184	72.9653	9.25053	42.6074	119.198	20.7322	78.0062	59.2376	18.4084	71.8637
chr2:227072351:227072891	chr2	227072351	227072891	.	541	-4.89952	3.89929	2.28945e-06	0.000167918	11.8468	2.71503	25.9725	34.2073	0	14.9083	23.1817	0.308735	8.85344	21.8979	5.01854	48.0083	63.2297	0	27.5569	42.8497	0.570675	16.3649
chr4:11544587:11545715	chr4	11544587	11545715	.	1129	-1.55321	7.04148	3.54931e-09	9.39885e-07	188.637	84.166	99.0802	199.024	69.6998	119.266	254.998	67.3043	90.6175	167.083	74.5491	87.7592	176.284	61.7358	105.639	225.862	59.6141	80.2635
chr13:44933824:44935386	chr13	44933824	44935386	.	1563	-0.906142	6.93454	9.46266e-05	0.00296881	164.944	97.7411	69.2599	182.698	79.6569	102.228	197.044	110.219	83.3265	105.53	62.5343	44.3122	116.889	50.9641	65.405	126.068	70.5173	53.3119
chr7:16707554:16708585	chr7	16707554	16708585	.	1032	-2.81075	5.36431	5.02059e-09	1.26012e-06	82.0161	6.78758	26.9344	80.8535	22.1269	20.2326	87.377	8.33586	22.9148	79.473	6.57711	26.0992	78.3465	21.4408	19.6053	84.6677	8.07738	22.2042
chr16:81619455:81621015	chr16	81619455	81621015	.	1561	-1.14875	6.93872	2.45727e-06	0.000176276	181.347	70.5908	141.406	158.597	86.295	113.942	148.006	65.1432	125.51	116.173	45.2215	90.5866	101.6	55.2818	72.9928	94.8149	41.7317	80.4039
chr9:97785250:97786610	chr9	97785250	97786610	.	1361	-1.41857	6.68306	2.67919e-06	0.000189145	163.121	63.8032	122.167	106.509	22.1269	133.109	139.982	63.2908	97.3878	119.854	46.8797	89.7625	78.2579	16.2578	97.8027	102.852	46.5031	71.5561
chr17:80117398:80119296	chr17	80117398	80119296	.	1899	-1.69431	5.6036	2.70692e-06	0.000190567	72.9032	17.6477	33.668	79.2987	26.5523	44.7248	77.5694	25.3163	45.8296	38.3903	9.29315	17.7293	41.7581	13.9823	23.5518	40.8475	13.3314	24.1335
chr7:23958:24470	chr7	23958	24470	.	513	-0.976888	7.32977	8.35486e-06	0.00047659	260.629	145.254	131.786	222.347	117.273	118.201	227.359	102.809	109.887	508.049	283.146	256.893	433.425	228.602	230.412	443.194	200.407	214.204
chr3:48198900:48199946	chr3	48198900	48199946	.	1047	-2.17123	5.86437	3.70824e-09	9.73043e-07	94.7742	24.4353	36.5539	103.399	16.5952	44.7248	123.933	28.0949	38.0177	90.5197	23.3384	34.9129	98.7576	15.8502	42.7171	118.369	26.8337	36.3111
chr4:11636899:11637964	chr4	11636899	11637964	.	1066	-1.58736	6.01128	1.38958e-06	0.000114271	105.71	20.3627	51.9449	121.28	39.8284	36.2058	107.884	46.3103	36.4553	99.1648	19.102	48.7288	113.771	37.3625	33.9641	101.204	43.4431	34.1982
chr10:15253054:15254112	chr10	15253054	15254112	.	1059	-1.01549	7.5742	2.77195e-06	0.000193728	286.145	149.327	173.15	220.015	101.784	178.899	268.372	131.83	192.172	270.203	141.007	163.503	207.757	96.1131	168.932	253.421	124.485	181.465
chr4:11652267:11653171	chr4	11652267	11653171	.	905	-1.48923	6.0846	2.89725e-06	0.000201509	115.734	39.3679	50.0211	89.4054	25.4459	69.2169	89.1602	38.5919	79.6809	127.883	43.5005	55.2719	98.7905	28.1171	76.4828	98.5196	42.643	88.0452
chr8:98867756:98868214	chr8	98867756	98868214	.	459	-2.56414	4.61217	3.33583e-06	0.000227938	49.2097	9.50261	20.2008	37.317	7.74442	19.1678	39.2305	5.2485	19.79	107.211	20.7028	44.0105	81.3007	16.8724	41.7598	85.4695	11.4346	43.1155
chr12:1584714:1585803	chr12	1584714	1585803	.	1090	-1.90428	5.41666	3.56678e-06	0.000240541	62.879	25.7928	48.0972	63.7499	9.95711	33.0112	61.5206	15.7455	49.9959	57.6872	23.6631	44.1258	58.4862	9.13496	30.2855	56.4409	14.4454	45.8678
chr2:54999089:54999800	chr2	54999089	54999800	.	712	-2.4442	5.02614	3.57985e-06	0.00024086	79.2822	1.35752	18.2769	39.6493	6.63807	33.0112	48.1465	16.9804	34.893	111.351	1.90662	25.6698	55.6873	9.32314	46.364	67.6215	23.8489	49.007
chr3:185275991:185277023	chr3	185275991	185277023	.	1033	-1.64372	6.2475	1.37125e-07	1.81559e-05	120.29	50.2281	67.336	111.174	37.6157	44.7248	155.139	37.6657	46.8711	116.448	48.6235	65.1849	107.622	36.4141	43.296	150.183	36.4625	45.3738
chr16:67438262:67439309	chr16	67438262	67439309	.	1048	-1.72598	5.13104	9.16283e-05	0.00291594	77.4597	29.8653	9.61944	80.0761	12.1698	17.038	37.4473	18.2154	20.3108	73.9119	28.4975	9.17885	76.4085	11.6124	16.2576	35.7322	17.3811	19.3806
chr6:151721529:151722067	chr6	151721529	151722067	.	539	-2.084	5.30407	3.71531e-06	0.000247094	64.7016	24.4353	36.5539	62.195	18.8079	38.3355	70.4366	8.02712	20.8316	120.04	45.3345	67.8179	115.39	34.894	71.1234	130.68	14.8926	38.6486
chrX:67723694:67724546	chrX	67723694	67724546	.	853	-3.28938	4.32096	3.75109e-06	0.0002489	35.5403	5.43006	20.2008	25.6555	0	29.8165	28.5313	3.39609	18.7485	41.6651	6.36584	23.6821	30.0767	0	34.9549	33.4482	3.98135	21.9794
chr5:76109883:76110538	chr5	76109883	76110538	.	656	-1.91727	5.45543	3.84724e-06	0.000254112	92.0403	17.6477	43.2875	69.9694	22.1269	30.8814	39.2305	14.8193	51.0375	140.305	26.902	65.987	106.661	33.73	47.0753	59.8026	22.5904	77.801
chr12:76370817:76372411	chr12	76370817	76372411	.	1595	-1.5549	5.89324	4.05049e-06	0.00026511	84.75	35.2954	78.8794	78.5212	17.7015	60.6979	78.461	29.0211	58.3285	53.1348	22.1288	49.4541	49.2296	11.0981	38.0551	49.1919	18.1951	36.5696
chr17:55372457:55373712	chr17	55372457	55373712	.	1256	-1.24039	6.6434	4.06769e-06	0.000265633	121.202	54.3006	152.949	105.732	34.2967	130.98	93.6183	46.9278	145.821	96.4981	43.233	121.775	84.1812	27.3063	104.283	74.5368	37.3629	116.1
chr5:112571378:112572411	chr5	112571378	112572411	.	1034	-1.6489	5.74883	4.09126e-06	0.000266491	57.4113	20.3627	59.6405	67.6371	26.5523	54.3087	80.2442	19.4503	83.8472	55.5235	19.6932	57.6794	65.4131	25.6792	52.5229	77.6056	18.8108	81.0902
chr8:28482114:28483392	chr8	28482114	28483392	.	1279	-1.11791	7.0633	4.21947e-06	0.000273687	212.331	70.5908	120.243	152.378	80.7632	102.228	200.611	103.426	146.342	166.013	55.1922	94.0132	119.138	63.1456	79.9281	156.85	80.865	114.419
chr1:26449412:26450478	chr1	26449412	26450478	.	1067	-1.18221	6.87967	4.26505e-06	0.000276023	186.814	90.9535	97.1563	141.494	66.3807	84.1252	174.754	66.9956	137.489	175.084	85.2423	91.0556	132.609	62.2125	78.8427	163.781	62.7887	128.855
chr20:55651329:55652007	chr20	55651329	55652007	.	679	-6.05377	3.46747	4.50236e-06	0.000287514	19.1371	0	17.315	21.7683	0	6.38926	15.1572	0.308735	6.77027	28.1842	0	25.5007	32.0593	0	9.4098	22.3229	0.454691	9.97095
chr9:112238914:112240074	chr9	112238914	112240074	.	1161	-4.33808	3.85601	4.58156e-06	0.000290642	19.1371	0	18.2769	25.6555	3.31904	13.8434	29.4229	0.617471	7.81186	16.4833	0	15.7424	22.0977	2.85877	11.9237	25.3427	0.531844	6.72856
chr2:202013626:202014883	chr2	202013626	202014883	.	1258	-1.23482	6.80212	4.64007e-06	0.000293065	181.347	70.5908	127.938	95.6249	58.6363	135.239	133.74	48.7802	139.572	144.155	56.1135	101.7	76.0134	46.6107	107.503	106.312	38.776	110.947
chr13:107222827:107223186	chr13	107222827	107223186	.	360	-1.22399	6.64557	4.951e-06	0.000310665	115.734	47.513	75.9935	144.603	64.168	116.071	169.404	68.848	84.8888	321.483	131.981	211.093	401.676	178.245	322.421	470.568	191.244	235.802
chr3:149108280:149108913	chr3	149108280	149108913	.	634	-1.06425	6.48929	6.10269e-05	0.00213772	166.766	61.0882	69.2599	111.174	79.6569	67.0872	135.524	58.351	47.3919	263.038	96.3536	109.243	175.353	125.642	105.816	213.76	92.0363	74.7507
chr19:24243224:24244129	chr19	24243224	24244129	.	906	-4.09119	4.16032	5.08662e-06	0.000316423	8.20161	2.71503	24.0486	20.2134	2.21269	15.9731	38.3389	0.308735	34.3722	9.05255	2.99672	26.5437	22.3106	2.44226	17.6304	42.3167	0.340768	37.9384
chr4:99582622:99583390	chr4	99582622	99583390	.	769	-1.91348	5.30479	5.06538e-06	0.000316423	53.7661	12.2176	51.9449	55.1981	16.5952	24.4921	66.8702	16.6717	43.7464	69.9169	15.8877	67.5487	71.7791	21.5802	31.8493	86.9573	21.6797	56.8874
chr5:73927426:73929241	chr5	73927426	73929241	.	1816	-1.12842	7.02687	5.06797e-06	0.000316423	166.766	58.3732	144.292	147.713	102.89	157.602	186.345	68.5393	128.114	91.8315	32.1438	79.4557	81.3399	56.6576	86.785	102.613	37.7419	70.5476
chr6:165987635:165988911	chr6	165987635	165988911	.	1277	-1.92715	5.23299	5.14934e-06	0.00031895	61.0564	10.8601	24.0486	57.5304	19.9142	42.595	64.1954	16.363	28.6435	47.8124	8.5044	18.8321	45.0512	15.5945	33.3555	50.2705	12.8136	22.4303
chr11:102048653:102049547	chr11	102048653	102049547	.	895	-1.20034	6.61343	5.17468e-06	0.000319833	137.605	46.1555	85.613	119.725	60.849	92.6442	138.198	62.3646	123.427	153.748	51.5704	95.657	133.771	67.9877	103.513	154.412	69.6811	137.908
chr8:77343113:77344151	chr8	77343113	77344151	.	1039	-1.3164	6.49164	2.73378e-06	0.00019199	97.508	59.7307	71.1838	146.158	53.1046	64.9574	189.02	60.2034	54.683	93.848	57.4886	68.5119	140.672	51.1112	62.5192	181.925	57.9436	52.6304
chr3:87255114:87255846	chr3	87255114	87255846	.	733	-2.54812	5.24857	1.61882e-07	2.04041e-05	64.7016	4.07255	31.7441	81.631	21.0206	13.8434	82.919	12.9669	15.6237	88.2696	5.556	43.3071	111.366	28.6774	18.8859	113.123	17.6902	21.3147
chr21:15906056:15906940	chr21	15906056	15906940	.	885	-2.53235	5.70128	6.46058e-09	1.57568e-06	127.581	20.3627	28.8583	83.1859	27.6586	31.9463	89.1602	8.95333	38.0177	144.159	23.0087	32.6083	93.9953	31.2527	36.0975	100.746	10.1168	42.9578
chr7:43733567:43734363	chr7	43733567	43734363	.	797	-1.44447	6.18581	5.93961e-06	0.000358663	74.7258	21.7202	114.471	64.5273	26.5523	79.8657	98.9679	35.1958	123.948	93.7588	27.2525	143.628	80.9628	33.3153	100.208	124.176	44.1604	155.518
chr15:66844229:66844843	chr15	66844229	66844843	.	615	-2.10583	5.23108	6.0202e-06	0.00036277	71.0806	16.2902	31.7441	53.6432	3.31904	29.8165	48.1465	17.9067	51.0375	115.578	26.4881	51.6165	87.2247	5.39681	48.4822	78.287	29.1165	82.9877
chr19:47428424:47429304	chr19	47428424	47429304	.	881	-4.2144	3.88658	6.33368e-06	0.000379285	18.2258	2.71503	9.61944	31.875	3.31904	2.12975	41.9053	0.308735	9.89502	20.6876	3.08176	10.9188	36.1804	3.76735	2.41743	47.5656	0.350437	11.2316
chr21:35133695:35134605	chr21	35133695	35134605	.	911	-2.33929	4.71787	6.83302e-06	0.000402507	52.8548	8.14509	21.1628	38.0945	9.95711	30.8814	36.5557	7.40965	19.2692	58.0185	8.94083	23.2302	41.8161	10.9299	33.8984	40.127	8.13353	21.1517
chr5:10702164:10703825	chr5	10702164	10703825	.	1662	-1.09306	6.8011	6.87216e-06	0.000403988	147.629	78.7359	115.433	141.494	67.4871	107.552	152.464	62.982	116.657	88.8261	47.3742	69.4544	85.1346	40.6059	64.7127	91.7353	37.8953	70.1908
chr6:142644119:142645136	chr6	142644119	142645136	.	1018	-2.92318	4.50037	3.80995e-06	0.000252225	38.2742	9.50261	8.65749	53.6432	0	8.51901	56.171	8.64459	6.77027	37.5974	9.33458	8.50441	52.6947	0	8.36838	55.1778	8.49174	6.65056
chr8:126283129:126284394	chr8	126283129	126284394	.	1266	-0.912534	7.79994	7.42163e-06	0.000431891	252.427	145.254	228.943	307.088	178.122	198.067	338.809	154.059	189.568	199.39	114.735	180.839	242.566	140.696	156.451	267.622	121.69	149.738
chr6:170122545:170123145	chr6	170122545	170123145	.	601	-3.94925	4.12396	7.62678e-06	0.000442937	42.8306	0	14.4292	9.32925	5.53173	23.4273	30.3145	0.617471	18.2277	71.2656	0	24.0086	15.5229	9.20421	38.9805	50.4401	1.02741	30.3289
chr1:95070370:95072395	chr1	95070370	95072395	.	2026	-1.17825	6.59857	7.71889e-06	0.000447386	147.629	47.513	88.4988	110.396	65.2744	115.007	120.366	54.0287	109.887	72.8672	23.4516	43.6815	54.4897	32.2184	56.7653	59.4108	26.6677	54.2383
chr18:60540987:60541666	chr18	60540987	60541666	.	680	-6.32112	3.34087	7.76236e-06	0.000449003	20.0484	0	7.69555	18.6585	0	2.12975	28.5313	0.308735	1.56237	29.4829	0	11.317	27.439	0	3.13199	41.9578	0.454023	2.2976
chr10:118733520:118734871	chr10	118733520	118734871	.	1352	-1.97486	5.83666	7.83277e-06	0.00045217	82.9274	23.0778	75.0316	58.3078	34.2967	93.7091	72.2198	5.2485	58.3285	61.3368	17.0693	55.4967	43.1271	25.3674	69.3114	53.417	3.88203	43.1424
chr12:104671166:104672046	chr12	104671166	104672046	.	881	-1.58683	5.74798	7.90278e-06	0.000454394	69.258	29.8653	66.3741	104.177	25.4459	43.6599	72.2198	26.86	32.8098	78.613	33.8994	75.3395	118.248	28.883	49.5572	81.9748	30.4881	37.2415
chr8:131054350:131055565	chr8	131054350	131055565	.	1216	-1.83766	5.48169	8.30358e-06	0.000475545	66.5242	6.78758	32.7061	64.5273	22.1269	69.2169	64.1954	22.2289	40.1009	54.7074	5.58189	26.8964	53.0653	18.1965	56.9218	52.7923	18.2804	32.9777
chr2:227342744:227343636	chr2	227342744	227343636	.	893	-2.35352	4.75987	8.34879e-06	0.00047659	49.2097	10.8601	18.2769	37.317	8.85076	37.2707	36.5557	5.86597	27.0811	55.106	12.1614	20.4669	41.7884	9.91127	41.7365	40.9358	6.56884	30.326
chr14:101126775:101127923	chr14	101126775	101127923	.	1149	-2.19225	4.77306	1.59589e-05	0.000782068	55.5887	2.71503	11.5433	51.3109	14.3825	8.51901	57.0626	15.7455	14.5821	48.3801	2.36295	10.0464	44.657	12.5174	7.41428	49.6628	13.7037	12.6911
chr20:45829206:45829915	chr20	45829206	45829915	.	710	-2.69741	6.20794	2.24399e-12	2.49118e-09	129.403	17.6477	63.4883	120.503	17.7015	45.7897	164.946	25.3163	66.1404	182.258	24.8559	89.4201	169.722	24.9317	64.4925	232.319	35.6568	93.1555
chr9:138796557:138798259	chr9	138796557	138798259	.	1703	-1.81403	5.3585	8.44951e-06	0.000481038	58.3226	13.5752	54.8308	59.0853	22.1269	44.7248	48.1465	12.6582	42.7048	34.247	7.97132	32.1966	34.6948	12.9929	26.2624	28.2716	7.43285	25.0762
chr10:28342603:28344359	chr10	28342603	28344359	.	1757	-1.27365	6.38703	8.47933e-06	0.000481786	119.379	35.2954	90.4227	95.6249	33.1904	113.942	103.426	57.116	90.6175	67.9448	20.0884	51.4643	54.4251	18.8904	64.8502	58.865	32.5077	51.5751
chrX:133646615:133647425	chrX	133646615	133647425	.	811	-2.39306	5.04057	8.56182e-06	0.000484565	42.8306	16.2902	30.7822	54.4207	1.10635	20.2326	48.1465	10.1883	56.7661	52.8121	20.0865	37.9558	67.1031	1.36417	24.9478	59.3669	12.5626	69.9953
chr7:116412355:116413189	chr7	116412355	116413189	.	835	-1.42887	6.00882	8.76041e-06	0.00049464	100.242	25.7928	81.7652	83.9633	25.4459	57.5033	71.3282	39.5181	79.1601	120.05	30.8896	97.9224	100.555	30.4742	68.8662	85.423	47.3271	94.8026
chr12:125403994:125405226	chr12	125403994	125405226	.	1233	-1.28307	6.42926	8.99662e-06	0.000502661	96.5967	61.0882	94.2705	128.277	32.084	110.747	120.366	49.0889	70.3067	78.3429	49.5444	76.4562	104.037	26.0211	89.8192	97.6207	39.8126	57.0208
chr1:8229118:8230205	chr1	8229118	8230205	.	1088	-2.56911	4.62011	9.19965e-06	0.000512623	42.8306	12.2176	22.1247	40.4268	2.21269	28.7516	42.7969	7.10091	10.9366	39.3664	11.2294	20.3352	37.157	2.03372	26.4261	39.3354	6.52658	10.052
chr6:130008152:130008725	chr6	130008152	130008725	.	574	-2.77212	4.48295	9.56449e-06	0.00052685	23.6935	6.78758	29.8202	27.2103	3.31904	14.9083	39.2305	3.70482	38.0177	41.2779	11.825	51.9517	47.4048	5.78229	25.9726	68.3458	6.4544	66.2329
chr11:111913067:111914182	chr11	111913067	111914182	.	1116	-1.80461	5.45019	9.58782e-06	0.000527129	45.5645	8.14509	75.9935	60.6402	17.7015	54.3087	57.9542	18.5241	41.1424	40.8284	7.29847	68.0946	54.3371	15.8616	48.6637	51.9303	16.5987	36.866
chr5:68194581:68195279	chr5	68194581	68195279	.	699	-1.62555	5.52874	1.0017e-05	0.000540359	68.3468	28.5078	40.4016	60.6402	16.5952	44.7248	80.2442	22.8464	40.1009	97.7779	40.7837	57.7992	86.7527	23.7413	63.984	114.799	32.6844	57.3689
chr16:4127184:4128182	chr16	4127184	4128182	.	999	-3.18693	4.17526	1.02534e-05	0.00054908	19.1371	0	19.2389	45.0914	3.31904	10.6488	29.4229	4.93977	16.1445	19.1562	0	19.2581	45.1365	3.32236	10.6594	29.4523	4.94471	16.1607
chr2:63841467:63842273	chr2	63841467	63842273	.	807	-1.77258	5.47221	1.09252e-05	0.000578615	81.1048	23.0778	35.5919	81.631	29.8713	24.4921	52.6045	13.5844	44.2672	100.502	28.597	44.104	101.154	37.0153	30.3496	65.1853	16.8332	54.854
chr3:111654846:111656381	chr3	111654846	111656381	.	1536	-0.905806	7.98732	1.11573e-05	0.00058767	338.089	202.27	287.621	248.003	154.888	233.208	390.522	165.791	250.5	220.11	131.686	187.253	161.46	100.839	151.828	254.246	107.937	163.086
chr18:29962844:29963560	chr18	29962844	29963560	.	717	-2.7816	4.89913	1.12934e-05	0.000593266	82.0161	21.7202	21.1628	59.8627	6.63807	19.1678	22.2901	1.54368	22.394	114.388	30.2932	29.5157	83.4905	9.25812	26.7333	31.088	2.15297	31.2329
chr7:91889302:91890666	chr7	91889302	91890666	.	1365	-1.32303	6.20941	1.14121e-05	0.00059782	103.887	40.7255	45.2113	107.286	54.2109	84.1252	112.342	36.4308	68.7443	76.1077	29.8355	33.1219	78.5981	39.715	61.6302	82.3018	26.6892	50.3621
chr16:68955395:68956021	chr16	68955395	68956021	.	627	-1.09381	6.68099	1.16841e-05	0.000610959	132.137	65.1607	85.613	149.268	75.2315	102.228	139.982	58.9685	101.554	210.745	103.925	136.544	238.067	119.986	163.043	223.256	94.0486	161.968
chr16:66545581:66546221	chr16	66545581	66546221	.	641	-2.34319	4.80407	1.18927e-05	0.000618508	68.3468	17.6477	21.1628	38.0945	6.63807	23.4273	32.9893	5.86597	24.9979	106.625	27.5315	33.0152	59.4297	10.3558	36.548	51.4654	9.15128	38.9983
chr9:90959279:90960036	chr9	90959279	90960036	.	758	-1.3084	5.48807	0.00034185	0.00788741	62.879	24.4353	19.2389	85.5182	43.1475	18.1029	77.5694	25.0076	34.3722	82.9538	32.2365	25.3811	112.821	56.9228	23.8824	102.334	32.9915	45.3459
chr4:99575234:99576233	chr4	99575234	99576233	.	1000	-1.40663	6.23978	1.19826e-05	0.000620944	107.532	16.2902	58.6786	97.9572	51.9982	84.1252	107.884	45.3841	95.3046	107.532	16.2902	58.6786	97.9572	51.9982	84.1252	107.884	45.3841	95.3046
chr10:28400513:28401396	chr10	28400513	28401396	.	884	-1.46094	5.96562	1.26814e-05	0.000649001	95.6855	46.1555	69.2599	82.4084	22.1269	58.5682	70.4366	25.3163	79.1601	108.241	52.2121	78.3483	93.2222	25.0304	66.2536	79.6794	28.6384	89.5477
chr8:75513591:75514669	chr8	75513591	75514669	.	1079	-1.8173	5.27749	1.31279e-05	0.000667119	60.1451	12.2176	32.7061	38.0945	18.8079	40.4653	70.4366	16.0542	46.3503	55.7416	11.3231	30.3115	35.3053	17.4308	37.5026	65.2795	14.8788	42.9568
chr1:8555915:8556485	chr1	8555915	8556485	.	571	-1.94148	5.16964	1.33631e-05	0.000676691	39.1855	21.7202	36.5539	56.753	11.0635	20.2326	77.5694	13.5844	33.8514	68.626	38.039	64.0173	99.3922	19.3756	35.4337	135.848	23.7905	59.2844
chr7:72084799:72085285	chr7	72084799	72085285	.	487	-2.85258	4.31488	1.37011e-05	0.000690172	22.7823	5.43006	15.3911	27.2103	1.10635	27.6868	35.6641	4.63103	25.5187	46.7808	11.15	31.6039	55.8734	2.27176	56.8517	73.2322	9.5093	52.3999
chr11:48013210:48014337	chr11	48013210	48014337	.	1128	-1.68608	5.49692	1.37958e-05	0.000692526	62.879	32.5804	50.0211	75.4115	14.3825	38.3355	72.2198	20.0678	28.1227	55.7438	28.8833	44.3449	66.8541	12.7504	33.9854	64.0246	17.7906	24.9315
chr13:107001413:107002288	chr13	107001413	107002288	.	876	-1.29328	6.31591	1.54334e-05	0.000760186	89.3064	33.9379	56.7547	135.274	66.3807	88.3847	123.041	42.2968	68.2235	101.948	38.7419	64.7884	154.423	75.7771	100.896	140.458	48.284	77.8807
chr1:217833478:217834328	chr1	217833478	217834328	.	851	-1.19003	5.68842	0.000464078	0.00999446	87.4838	33.9379	27.8964	69.192	55.3173	26.6219	93.6183	24.0814	33.8514	102.801	39.88	32.7807	81.3067	65.0027	31.2831	110.01	28.2977	39.7783
chr11:77730678:77731290	chr11	77730678	77731290	.	613	-2.12748	4.86681	1.69222e-05	0.000821754	49.2097	8.14509	10.5814	65.3048	8.85076	22.3624	38.3389	15.4368	29.1643	80.2768	13.2873	17.2616	106.533	14.4384	36.4803	62.5431	25.1823	47.5763
chr19:46031367:46032470	chr19	46031367	46032470	.	1104	-2.76035	4.30191	1.69165e-05	0.000821754	41.9193	2.71503	22.1247	29.5426	7.74442	17.038	23.1817	3.70482	16.6653	37.9704	2.45927	20.0405	26.7596	7.01487	15.433	20.9979	3.35582	15.0954
chr18:61077778:61078577	chr18	61077778	61078577	.	800	-6.84099	3.55003	1.71623e-05	0.000826998	8.20161	0	6.7336	13.9939	0	11.7136	8.91602	0	38.5385	10.252	0	8.41701	17.4924	0	14.642	11.145	0	48.1731
chr17:19070985:19072243	chr17	19070985	19072243	.	1259	-2.72871	4.3237	1.73429e-05	0.000830156	30.0726	5.43006	21.1628	38.0945	7.74442	8.51901	34.7725	3.39609	17.7069	23.8861	4.313	16.8092	30.2577	6.15125	6.76649	27.6191	2.69745	14.0642
chr9:37952969:37954984	chr9	37952969	37954984	.	2016	-0.893044	7.16865	3.29512e-05	0.00135485	200.484	109.959	125.053	211.463	105.103	100.098	205.96	116.393	106.762	99.4463	54.543	62.0301	104.892	52.1343	49.652	102.163	57.7347	52.9574
chr17:40580127:40580837	chr17	40580127	40580837	.	711	-1.02536	6.80499	1.89593e-05	0.000888379	147.629	67.8758	92.3466	149.268	76.3378	111.812	149.789	74.4052	122.907	207.636	95.4652	129.883	209.941	107.367	157.26	210.674	104.649	172.864
chr8:71016970:71017741	chr8	71016970	71017741	.	772	-1.27825	6.24434	1.94697e-05	0.000907872	116.645	29.8653	83.6891	98.7346	37.6157	97.9686	64.1954	44.4579	94.7838	151.095	38.6857	108.406	127.895	48.7251	126.902	83.1546	57.588	122.777
chr17:43396348:43398876	chr17	43396348	43398876	.	2529	-0.956354	7.22178	2.05749e-05	0.000954831	229.645	99.0986	152.949	169.481	81.8696	133.109	197.044	121.333	144.78	90.8047	39.1849	60.4781	67.0152	32.3723	52.6332	77.9139	47.9767	57.2478
chr1:55321957:55323115	chr1	55321957	55323115	.	1159	-2.1514	5.01292	2.07724e-05	0.000962397	57.4113	16.2902	28.8583	43.5365	12.1698	12.7785	47.2549	7.40965	50.5167	49.5352	14.0554	24.8993	37.5639	10.5003	11.0255	40.7722	6.39314	43.5864
chr13:20387634:20388051	chr13	20387634	20388051	.	418	-2.61082	5.17702	2.4839e-08	4.77969e-06	74.7258	6.78758	21.1628	77.7438	9.95711	24.4921	60.629	15.128	20.8316	178.77	16.2382	50.6286	185.99	23.8208	58.5937	145.045	36.1915	49.8364
chr17:80821842:80822380	chr17	80821842	80822380	.	539	-1.82104	5.31995	2.11845e-05	0.000978352	55.5887	25.7928	40.4016	50.5335	12.1698	44.7248	49.9297	9.87953	57.2869	103.133	47.853	74.9566	93.7541	22.5785	82.9773	92.634	18.3294	106.284
chr19:49775316:49776256	chr19	49775316	49776256	.	941	-1.20892	6.48954	2.15864e-05	0.000988224	120.29	42.083	45.2113	149.268	56.4236	97.9686	125.716	67.9218	89.0552	127.832	44.7215	48.0461	158.627	59.9613	104.111	133.598	72.1804	94.6388
chr10:99355226:99356832	chr10	99355226	99356832	.	1607	-1.30652	6.17575	2.16526e-05	0.000988844	102.064	21.7202	95.2324	73.0792	47.5729	78.8008	91.8351	36.7395	89.5759	63.5124	13.516	59.261	45.4755	29.6035	49.036	57.1469	22.8622	55.7411
chr11:108756865:108758088	chr11	108756865	108758088	.	1224	-1.81612	5.21321	2.17129e-05	0.000988844	61.9677	8.14509	19.2389	68.4145	15.4888	38.3355	55.2794	24.6988	27.6019	50.6272	6.65449	15.718	55.8942	12.6543	31.3199	45.1629	20.1788	22.5506
chr2:27516115:27516642	chr2	27516115	27516642	.	528	-2.5734	4.74842	2.172e-05	0.000988844	45.5645	19.0052	19.2389	34.9847	8.85076	11.7136	65.9786	1.85241	22.9148	86.2964	35.9947	36.4373	66.2589	16.7628	22.1849	124.959	3.50836	43.3992
chr2:9520253:9521884	chr2	9520253	9521884	.	1632	-1.28985	6.21726	2.31619e-05	0.00103846	121.202	33.9379	66.3741	91.7377	56.4236	97.9686	96.2931	37.0482	56.2454	74.2657	20.7953	40.6704	56.2118	34.5733	60.0298	59.0031	22.7011	34.4641
chr2:9734560:9736354	chr2	9734560	9736354	.	1795	-1.47538	5.60412	2.35966e-05	0.00105107	84.75	21.7202	43.2875	65.3048	28.765	48.9843	63.3038	25.625	42.7048	47.2145	12.1004	24.1156	36.3815	16.0251	27.2893	35.2667	14.2758	23.791
chr2:69828112:69828940	chr2	69828112	69828940	.	829	-1.6532	6.0325	9.74461e-07	8.81719e-05	113.911	20.3627	50.983	80.0761	40.9348	47.9194	142.656	41.6793	36.9761	137.408	24.563	61.4994	96.5936	49.3785	57.8039	172.083	50.2766	44.6033
chr11:48007760:48009323	chr11	48007760	48009323	.	1564	-1.30607	6.04172	2.43332e-05	0.0010764	84.75	29.8653	64.4502	90.9602	44.2538	69.2169	112.342	40.7531	43.2256	54.188	19.0955	41.2086	58.1587	28.2953	44.2564	71.8299	26.057	27.6379
chr6:159069679:159070329	chr6	159069679	159070329	.	651	-1.43185	5.70932	2.44661e-05	0.0010798	84.75	27.1503	52.9069	59.0853	22.1269	51.114	83.8106	32.726	43.7464	130.184	41.7055	81.2702	90.7608	33.9891	78.5162	128.741	50.2703	67.1988
chr2:70362830:70363844	chr2	70362830	70363844	.	1015	-1.97175	5.30551	2.46384e-05	0.00108244	65.6129	31.2229	44.2494	33.4298	12.1698	31.9463	85.5938	8.64459	31.7682	64.6432	30.7614	43.5955	32.9358	11.99	31.4742	84.3289	8.51684	31.2987
chr1:94714102:94715640	chr1	94714102	94715640	.	1539	-1.8244	5.34027	2.50875e-05	0.00109734	44.6532	12.2176	49.0591	63.7499	9.95711	38.3355	84.7022	27.1687	20.8316	29.0144	7.93869	31.8773	41.4229	6.46986	24.9094	55.0372	17.6535	13.5358
chr15:67388888:67389780	chr15	67388888	67389780	.	893	-2.16615	4.8503	2.51676e-05	0.00109734	39.1855	9.50261	50.983	37.317	11.0635	18.1029	39.2305	6.48344	34.3722	43.8807	10.6412	57.0918	41.7884	12.3891	20.272	43.9311	7.2603	38.4907
chr7:92381107:92382503	chr7	92381107	92382503	.	1397	-0.955899	7.44148	2.55556e-05	0.0011109	230.556	109.959	284.735	162.485	103.996	189.548	186.345	87.6809	196.338	165.037	78.7106	203.819	116.31	74.4427	135.682	133.389	62.7637	140.543
chr16:27285079:27285694	chr16	27285079	27285694	.	616	-1.90171	5.61256	3.91477e-07	4.20059e-05	68.3468	16.2902	33.668	96.4023	29.8713	30.8814	95.4015	22.8464	32.8098	110.953	26.4451	54.6559	156.497	48.4924	50.1321	154.873	37.0883	53.2626
chrX:45304587:45305745	chrX	45304587	45305745	.	1159	-2.56555	4.42935	2.68212e-05	0.00115778	26.4274	9.50261	14.4292	32.6524	1.10635	20.2326	51.7129	7.40965	17.1861	22.8019	8.19897	12.4497	28.1729	0.954569	17.457	44.6186	6.39314	14.8284
chr12:64310504:64313183	chr12	64310504	64313183	.	2680	-1.04631	6.73684	2.76619e-05	0.00118962	158.564	65.1607	114.471	149.268	82.9759	88.3847	120.366	61.1296	106.241	59.1658	24.3137	42.7132	55.697	30.9612	32.9794	44.9128	22.8096	39.6423
chr5:115265406:115266870	chr5	115265406	115266870	.	1465	-0.881818	8.01713	2.79382e-05	0.00119304	352.669	138.467	254.915	394.938	185.866	292.841	275.505	223.833	198.421	240.73	94.5164	174.003	269.583	126.871	199.891	188.058	152.787	135.441
chr12:56685132:56686102	chr12	56685132	56686102	.	971	-1.21839	6.32991	2.0576e-05	0.000954831	127.581	39.3679	69.2599	122.835	76.3378	52.1789	127.499	47.5453	48.4335	131.391	40.5437	71.3285	126.504	78.6178	53.7373	131.307	48.9652	49.88
chr17:73699228:73700241	chr17	73699228	73700241	.	1014	-1.36937	5.97545	2.82343e-05	0.001202	77.4597	25.7928	58.6786	125.168	49.7856	45.7897	75.7862	32.726	60.9325	76.3902	25.4367	57.8684	123.439	49.0982	45.1575	74.7399	32.2741	60.0912
chr7:107589399:107590425	chr7	107589399	107590425	.	1027	-3.06121	4.1097	2.87068e-05	0.00122032	21.871	0	11.5433	41.9816	4.42538	12.7785	21.3985	4.3223	21.8732	21.296	0	11.2398	40.8779	4.30904	12.4426	20.8359	4.20866	21.2981
chr17:4235538:4236095	chr17	4235538	4236095	.	558	-2.39226	4.59648	3.01151e-05	0.00126527	51.0322	9.50261	20.2008	38.8719	11.0635	12.7785	27.6397	4.01356	29.1643	91.4556	17.0298	36.2022	69.6629	19.827	22.9006	49.5335	7.19276	52.2657
chr2:26308823:26309709	chr2	26308823	26309709	.	887	-3.25395	4.14456	3.02438e-05	0.00126699	51.9435	4.07255	18.2769	15.5488	4.42538	24.4921	12.4824	1.23494	15.1029	58.5609	4.59137	20.6053	17.5296	4.98916	27.6123	14.0726	1.39227	17.027
chr8:107057805:107058780	chr8	107057805	107058780	.	976	-0.884414	7.32652	3.02372e-05	0.00126699	205.04	95.0261	169.302	198.247	115.06	189.548	180.104	105.279	173.423	210.082	97.3628	173.465	203.122	117.889	194.209	184.532	107.868	177.688
chr17:48501161:48501727	chr17	48501161	48501727	.	567	-2.7236	4.27108	3.06782e-05	0.00128333	40.0968	9.50261	19.2389	34.2073	4.42538	14.9083	24.0733	2.77862	12.499	70.7174	16.7594	33.931	60.3303	7.80491	26.2932	42.4573	4.90056	22.044
chr14:55594058:55594724	chr14	55594058	55594724	.	667	-1.75369	5.32953	3.07673e-05	0.00128519	67.4355	21.7202	47.1352	58.3078	8.85076	55.3735	33.8809	16.6717	39.5801	101.103	32.5641	70.6675	87.4181	13.2695	83.0188	50.7959	24.9951	59.3404
chr5:45277868:45278631	chr5	45277868	45278631	.	764	-1.82418	5.29174	3.14994e-05	0.00131008	43.7419	6.78758	73.1077	39.6493	8.85076	71.3467	22.2901	12.0407	60.9325	57.2538	8.88426	95.6907	51.897	11.5848	93.3857	29.1755	15.7601	79.7545
chr20:34463199:34464012	chr20	34463199	34464012	.	814	-1.87917	5.35108	3.22525e-05	0.00133563	41.0081	19.0052	67.336	52.8658	17.7015	61.7628	42.7969	5.55724	47.3919	50.3784	23.3479	82.7224	64.9457	21.7464	75.8757	52.5761	6.82707	58.221
chr3:50283831:50284552	chr3	50283831	50284552	.	722	-3.53695	3.93392	3.28102e-05	0.00135447	20.0484	5.43006	18.2769	22.5457	0	20.2326	24.0733	1.23494	13.5405	27.7678	7.52086	25.3143	31.2267	0	28.0231	33.3425	1.71045	18.7542
chr4:11549807:11551290	chr4	11549807	11551290	.	1484	-1.19363	6.4502	9.32545e-06	0.000516641	110.266	48.8706	66.3741	160.93	59.7427	54.3087	133.74	65.7606	72.3899	74.3033	32.9316	44.7265	108.443	40.2579	36.5961	90.1215	44.3131	48.7802
chr1:115732527:115733420	chr1	115732527	115733420	.	894	-1.08342	6.15793	0.000113839	0.00340857	110.266	59.7307	55.7927	94.8474	49.7856	47.9194	121.258	46.3103	44.2672	123.34	66.8128	62.408	106.093	55.6885	53.6011	135.635	51.8012	49.5159
chr11:119088977:119089870	chr11	119088977	119089870	.	894	-0.968522	7.11941	3.34249e-05	0.00136663	200.484	74.6633	134.672	183.475	99.5711	150.148	188.128	112.997	93.7423	224.255	83.516	150.64	205.23	111.377	167.95	210.434	126.395	104.857
chr19:50116336:50118004	chr19	50116336	50118004	.	1669	-1.60957	5.53905	3.35906e-05	0.00137137	41.0081	6.78758	82.7271	48.2012	15.4888	71.3467	44.5801	18.2154	75.5146	24.5704	4.06685	49.5669	28.8803	9.28031	42.7482	26.7107	10.914	45.2454
chr7:27810326:27811489	chr7	27810326	27811489	.	1164	-1.09427	6.59784	1.75604e-05	0.00083779	137.605	74.6633	75.9935	157.042	50.8919	63.8926	143.548	77.4926	76.5562	118.217	64.1438	65.2865	134.916	43.7216	54.8905	123.323	66.5744	65.7699
chr8:96081124:96081735	chr8	96081124	96081735	.	612	-2.63287	5.04911	3.06285e-07	3.45336e-05	48.2984	6.78758	25.9725	76.1889	4.42538	9.58388	75.7862	16.6717	19.2692	78.9189	11.0908	42.4387	124.492	7.23102	15.6599	123.834	27.2414	31.4857
chr8:37894090:37895177	chr8	37894090	37895177	.	1088	-1.684	6.9806	5.82704e-10	1.97455e-07	223.266	52.9431	122.167	208.353	61.9554	110.747	178.32	71.3179	93.7423	205.208	48.6609	112.286	191.501	56.9443	101.79	163.898	65.5495	86.1602
chr16:19106516:19107852	chr16	19106516	19107852	.	1337	-1.30996	5.62671	0.000103251	0.00318259	102.064	33.9379	30.7822	74.634	33.1904	35.1409	63.3038	30.2561	28.6435	76.3384	25.3836	23.0233	55.822	24.8245	26.2834	47.3476	22.6298	21.4237
chr16:19113570:19114338	chr16	19113570	19114338	.	769	-4.24886	4.53849	7.45627e-08	1.12679e-05	55.5887	9.50261	8.65749	40.4268	0	4.2595	61.5206	1.23494	15.1029	72.287	12.3571	11.2581	52.5706	0	5.53902	80.0007	1.60591	19.6397
chr17:73696386:73697082	chr17	73696386	73697082	.	697	-1.22412	6.33437	3.44909e-05	0.00140217	101.153	44.798	101.966	127.5	56.4236	56.4384	88.2686	37.357	98.4294	145.127	64.2726	146.293	182.927	80.9521	80.9733	126.641	53.5968	141.219
chr6:82647982:82648728	chr6	82647982	82648728	.	747	-0.951605	6.50054	0.00026673	0.00653003	134.871	73.3058	72.1458	130.61	86.295	72.4116	132.849	51.2501	49.4751	180.55	98.1336	96.5807	174.845	115.522	96.9365	177.843	68.6079	66.2317
chr17:73553024:73553864	chr17	73553024	73553864	.	841	-3.74455	3.69407	3.54511e-05	0.00142515	22.7823	2.71503	7.69555	24.1006	1.10635	12.7785	17.832	1.23494	13.0198	27.0895	3.22834	9.15047	28.657	1.31551	15.1944	21.2034	1.46842	15.4813
chr21:38710140:38711916	chr21	38710140	38711916	.	1777	-1.96412	5.08842	3.61509e-05	0.00144124	51.0322	9.50261	62.5263	59.0853	16.5952	21.2975	37.4473	11.7319	23.9564	28.7182	5.34756	35.1865	33.25	9.33888	11.9851	21.0733	6.60211	13.4813
chr7:111139320:111139771	chr7	111139320	111139771	.	452	-2.87011	4.11335	2.60328e-05	0.00112825	45.5645	6.78758	1.92389	32.6524	3.31904	9.58388	32.0977	4.93977	6.24948	100.806	15.0168	4.25639	72.2398	7.343	21.2033	71.0126	10.9287	13.8263
chr3:11253500:11254917	chr3	11253500	11254917	.	1418	-1.678	5.49937	3.73041e-05	0.00147905	93.8629	16.2902	61.5644	52.8658	12.1698	55.3735	43.6885	26.86	31.2474	66.1938	11.4881	43.4164	37.2819	8.58237	39.0505	30.81	18.9422	22.0363
chr8:54640183:54640832	chr8	54640183	54640832	.	650	-1.43015	5.76591	3.75909e-05	0.001488	43.7419	31.2229	64.4502	86.2956	23.2333	52.1789	84.7022	25.9338	64.0572	67.2953	48.0352	99.1542	132.762	35.7435	80.2753	130.311	39.8981	98.5496
chr18:3408669:3409836	chr18	3408669	3409836	.	1168	-2.91349	4.33674	3.77852e-05	0.00149197	36.4516	4.07255	22.1247	13.2164	6.63807	22.3624	26.7481	1.23494	35.4137	31.2086	3.48677	18.9424	11.3154	5.68328	19.1459	22.9007	1.05731	30.32
chr12:31911162:31911850	chr12	31911162	31911850	.	689	-1.62404	5.36192	3.88369e-05	0.00151485	41.0081	14.9327	37.5158	61.4176	17.7015	35.1409	86.4854	25.625	35.9345	59.5182	21.673	54.4496	89.1402	25.6916	51.0028	125.523	37.1916	52.1546
chr13:73544606:73545250	chr13	73544606	73545250	.	645	-2.07288	4.88757	4.03124e-05	0.00156185	49.2097	10.8601	37.5158	29.5426	2.21269	40.4653	37.4473	12.3494	33.3306	76.2941	16.8374	58.164	45.8025	3.43053	62.7369	58.0578	19.1464	51.6753
chr7:148469498:148470324	chr7	148469498	148470324	.	827	-1.08317	6.49188	4.07426e-05	0.00157429	99.3306	54.3006	88.4988	130.61	51.9982	117.136	120.366	58.0423	76.5562	120.11	65.6598	107.012	157.932	62.8757	141.64	145.546	70.1841	92.571
chr9:126839616:126842277	chr9	126839616	126842277	.	2662	-1.26931	6.05109	4.07162e-05	0.00157429	80.1935	39.3679	77.9174	101.844	29.8713	43.6599	94.5099	43.5317	71.3483	30.1253	14.7889	29.2703	38.2586	11.2214	16.4012	35.5033	16.353	26.8025
chr14:103602389:103603784	chr14	103602389	103603784	.	1396	-1.46845	5.58877	4.19719e-05	0.00161315	95.6855	19.0052	41.3636	60.6402	26.5523	30.8814	65.087	31.491	47.9127	68.5426	13.6141	29.6301	43.4385	19.0203	22.1213	46.6239	22.558	34.3214
chr17:55287008:55288155	chr17	55287008	55288155	.	1148	-1.07891	6.60159	4.22434e-05	0.00162143	108.444	48.8706	77.9174	157.82	85.1886	83.0603	141.765	59.5859	97.3878	94.463	42.5702	67.8723	137.474	74.2061	72.3522	123.488	51.9041	84.8326
chr3:118656946:118657772	chr3	118656946	118657772	.	827	-2.1501	4.66274	4.31218e-05	0.00164857	50.121	6.78758	11.5433	48.2012	6.63807	27.6868	27.6397	12.6582	22.394	60.6057	8.20747	13.9581	58.2843	8.02669	33.4786	33.4216	15.3061	27.0786
chr3:115518839:115520047	chr3	115518839	115520047	.	1209	-1.25321	6.02827	4.33897e-05	0.00165235	98.4193	25.7928	68.298	88.6279	36.5094	72.4116	66.8702	41.0618	74.9938	81.4056	21.334	56.4913	73.3068	30.198	59.8938	55.3103	33.9634	62.0296
chr5:179757525:179758230	chr5	179757525	179758230	.	706	-2.97824	4.06471	4.33926e-05	0.00165235	29.1613	4.07255	16.353	27.2103	6.63807	5.32438	32.9893	1.85241	14.0613	41.3049	5.76848	23.1629	38.5415	9.40237	7.54161	46.727	2.62381	19.9169
chr7:92327464:92328355	chr7	92327464	92328355	.	892	-2.1214	4.94664	4.33147e-05	0.00165235	56.5	9.50261	58.6786	27.9878	3.31904	19.1678	35.6641	12.3494	40.1009	63.3408	10.6531	65.7831	31.3764	3.72089	21.4885	39.9822	13.8446	44.9561
chr10:12769730:12770393	chr10	12769730	12770393	.	664	-3.10493	4.0289	4.35326e-05	0.0016555	24.6048	0	13.4672	16.3262	3.31904	27.6868	28.5313	3.39609	16.6653	37.0555	0	20.2819	24.5876	4.99855	41.6969	42.9688	5.11459	25.0983
chrX:154027325:154028063	chrX	154027325	154028063	.	739	-1.81583	5.03495	4.46185e-05	0.00168349	51.0322	10.8601	20.2008	52.8658	21.0206	37.2707	49.9297	12.3494	26.5603	69.0558	14.6957	27.3353	71.5369	28.4446	50.4339	67.5639	16.711	35.9409
chr7:101685240:101686382	chr7	101685240	101686382	.	1143	-1.37565	5.7845	4.53811e-05	0.0017078	60.1451	32.5804	84.651	70.7468	21.0206	54.3087	68.6534	24.3901	66.1404	52.6204	28.5043	74.0604	61.8958	18.3907	47.5141	60.0642	21.3387	57.8656
chr20:43123809:43125076	chr20	43123809	43125076	.	1268	-0.918604	7.17211	4.58045e-05	0.00171925	195.016	95.0261	150.063	203.689	127.23	111.812	178.32	86.1372	137.489	153.798	74.9417	118.346	160.638	100.339	88.1798	140.631	67.9315	108.43
chr12:51012334:51013440	chr12	51012334	51013440	.	1107	-1.2928	6.07519	4.61339e-05	0.00172936	118.468	55.6581	67.336	88.6279	32.084	51.114	74.8946	31.1823	74.473	107.017	50.2783	60.8275	80.0614	28.9829	46.1735	67.6555	28.1683	67.2746
chr3:12512408:12513492	chr3	12512408	12513492	.	1085	-1.92587	4.9212	4.74464e-05	0.00176709	38.2742	6.78758	41.3636	41.9816	16.5952	27.6868	42.7969	9.26206	34.3722	35.2757	6.25583	38.1231	38.6928	15.2951	25.5178	39.4442	8.53646	31.6794
chr20:2111586:2112591	chr20	2111586	2112591	.	1006	-1.80491	4.94164	4.80583e-05	0.00178757	47.3871	16.2902	25.9725	50.5335	12.1698	26.6219	52.6045	14.5106	17.7069	47.1045	16.193	25.8176	50.2321	12.0972	26.4631	52.2908	14.424	17.6013
chr1:150585663:150586557	chr1	150585663	150586557	.	895	-1.20481	6.24352	4.87632e-05	0.00180449	92.9516	39.3679	58.6786	89.4054	38.7221	63.8926	129.282	53.4112	101.033	103.857	43.9865	65.5626	99.8943	43.2649	71.3883	144.45	59.6773	112.886
chr5:92527488:92528586	chr5	92527488	92528586	.	1099	-1.00419	6.84961	4.9553e-05	0.00182902	171.323	85.5235	136.596	165.594	60.849	107.552	112.342	77.4926	107.283	155.889	77.8194	124.291	150.677	55.3676	97.8639	102.222	70.5119	97.6186
chr10:18896392:18897399	chr10	18896392	18897399	.	1008	-1.69031	5.54816	5.07263e-05	0.00186994	80.1935	38.0104	44.2494	53.6432	28.765	37.2707	88.2686	9.26206	30.7266	79.5571	37.7088	43.8982	53.2175	28.5367	36.9749	87.5681	9.18855	30.4828
chr3:111570158:111571050	chr3	111570158	111571050	.	893	-1.82487	5.08522	5.13561e-05	0.00188593	38.2742	13.5752	51.9449	44.314	12.1698	53.2438	32.0977	8.33586	39.0593	42.8602	15.2017	58.169	49.6237	13.628	59.6235	35.9437	9.33467	43.7394
chr2:220510011:220511319	chr2	220510011	220511319	.	1309	-1.0405	6.92401	5.17504e-05	0.00189559	151.274	81.4509	163.53	110.396	55.3173	103.293	194.369	82.4324	136.968	115.565	62.2238	124.928	84.3363	42.2592	78.9098	148.487	62.9735	104.635
chr12:53766071:53767329	chr12	53766071	53767329	.	1259	-0.803265	7.77478	5.21262e-05	0.00190452	292.524	156.114	230.866	246.448	174.803	175.705	309.386	155.603	216.128	232.346	123.999	183.373	195.749	138.842	139.559	245.74	123.592	171.666
chr1:32598870:32599577	chr1	32598870	32599577	.	708	-2.8601	4.17168	5.35308e-05	0.00194354	23.6935	1.35752	25.0105	31.0975	0	15.9731	26.7481	6.79218	17.1861	33.4655	1.91739	35.3256	43.923	0	22.5609	37.7798	9.59347	24.2741
chr15:36877769:36878282	chr15	36877769	36878282	.	514	-2.99729	3.90525	5.42709e-05	0.00196558	26.4274	4.07255	8.65749	19.4359	3.31904	10.6488	41.0137	3.39609	5.72869	51.4152	7.92324	16.8434	37.8131	6.45727	20.7174	79.7932	6.60718	11.1453
chr5:158959885:158960613	chr5	158959885	158960613	.	729	-3.61009	3.73172	5.56208e-05	0.00200429	11.8468	1.35752	5.77166	13.9939	2.21269	11.7136	44.5801	1.85241	13.0198	16.2507	1.86216	7.91723	19.196	3.03524	16.0681	61.1524	2.54103	17.8598
chr11:122450286:122451201	chr11	122450286	122451201	.	916	-1.33361	5.92445	5.61951e-05	0.00201567	87.4838	27.1503	60.6024	94.8474	56.4236	41.5302	86.4854	25.9338	53.1206	95.5064	29.6401	66.1599	103.545	61.5978	45.3386	94.4164	28.312	57.9919
chr9:132786724:132787833	chr9	132786724	132787833	.	1110	-2.18774	4.81942	5.76032e-05	0.0020552	51.0322	10.8601	50.983	36.5396	9.95711	30.8814	17.832	4.63103	29.1643	45.975	9.78389	45.9306	32.9185	8.97037	27.8211	16.0649	4.1721	26.2741
chr4:30954344:30954928	chr4	30954344	30954928	.	585	-2.00676	4.88228	5.92275e-05	0.00209503	50.121	12.2176	29.8202	47.4237	2.21269	17.038	50.8213	18.8329	22.394	85.6768	20.8849	50.9748	81.0662	3.78238	29.1248	86.8741	32.1929	38.2803
chr6:129504305:129506273	chr6	129504305	129506273	.	1969	-2.40034	5.36709	3.44323e-08	6.06009e-06	82.9274	10.8601	38.4777	76.9664	14.3825	25.557	71.3282	16.6717	20.8316	42.1165	5.51555	19.5418	39.0891	7.30447	12.9797	36.2256	8.4671	10.5798
chr12:12990936:12991687	chr12	12990936	12991687	.	752	-1.77201	5.24246	6.02053e-05	0.00212181	38.2742	14.9327	31.7441	57.5304	21.0206	19.1678	71.3282	13.8931	57.8077	50.8965	19.8573	42.2129	76.5032	27.9529	25.4891	94.8513	18.4749	76.872
chr1:29298363:29299825	chr1	29298363	29299825	.	1463	-1.03077	6.9011	1.00131e-05	0.000540359	182.258	92.311	89.4607	176.478	76.3378	103.293	164.055	87.0634	91.1383	124.578	63.0971	61.1488	120.628	52.179	70.6035	112.136	59.5102	62.2955
chr15:96795108:96795674	chr15	96795108	96795674	.	567	-3.77511	3.66001	6.09385e-05	0.00213772	35.5403	1.35752	8.65749	24.1006	4.42538	5.32438	16.9404	0.617471	4.68711	62.6813	2.39421	15.2689	42.5054	7.80491	9.39044	29.8773	1.08901	8.26651
chr12:6454267:6455397	chr12	6454267	6455397	.	1131	-1.17823	6.14499	8.66195e-05	0.00280263	74.7258	59.7307	51.9449	121.28	46.4665	37.2707	133.74	42.2968	56.2454	66.0705	52.8123	45.9283	107.233	41.0845	32.9537	118.25	37.3977	49.7306
chr2:162023136:162023911	chr2	162023136	162023911	.	776	-1.90303	4.96507	6.4811e-05	0.00223234	47.3871	6.78758	13.4672	62.9725	21.0206	27.6868	63.3038	16.9804	8.33265	61.0658	8.74688	17.3547	81.1501	27.0884	35.6788	81.577	21.882	10.7379
chr5:71643392:71644431	chr5	71643392	71644431	.	1040	-1.1906	6.43216	6.09819e-05	0.00213772	134.871	58.3732	99.0802	94.07	55.3173	78.8008	86.4854	30.8735	126.031	129.684	56.128	95.2694	90.4519	53.1897	75.77	83.1591	29.6861	121.184
chr8:126225927:126227148	chr8	126225927	126227148	.	1222	-1.09717	6.27056	6.09274e-05	0.00213772	96.5967	55.6581	76.9555	115.061	51.9982	64.9574	113.234	46.0016	61.4533	79.0481	45.5468	62.975	94.1578	42.5518	53.1567	92.6624	37.6445	50.2891
chr9:33534676:33535693	chr9	33534676	33535693	.	1018	-2.71325	4.25842	6.08552e-05	0.00213772	48.2984	4.07255	10.5814	17.1036	9.95711	12.7785	33.8809	2.46988	20.3108	47.4444	4.00054	10.3943	16.8012	9.78105	12.5526	33.2818	2.42621	19.9517
chr9:90996147:90996664	chr9	90996147	90996664	.	518	-2.2355	4.64077	6.14436e-05	0.00214971	63.7903	16.2902	21.1628	48.2012	3.31904	14.9083	21.3985	9.26206	13.5405	123.147	31.4482	40.8547	93.0524	6.40741	28.7804	41.3098	17.8804	26.1401
chr1:161003163:161004118	chr1	161003163	161004118	.	956	-1.46378	5.16275	0.000463181	0.00999196	82.0161	36.6529	15.3911	59.0853	15.4888	19.1678	42.7969	17.2892	22.394	85.7909	38.3399	16.0995	61.8047	16.2017	20.05	44.7667	18.0849	23.4247
chr4:30814444:30816017	chr4	30814444	30816017	.	1574	-1.1577	6.36985	6.30063e-05	0.0021911	102.976	57.0156	88.4988	125.945	25.4459	95.8388	91.8351	58.351	84.368	65.423	36.2234	56.2254	80.0158	16.1664	60.8887	58.345	37.0718	53.601
chr3:98231618:98232967	chr3	98231618	98232967	.	1350	-1.12798	6.20989	9.37144e-05	0.00295247	128.492	54.3006	64.4502	104.177	65.2744	48.9843	106.101	39.2094	43.2256	95.1792	40.2227	47.7409	77.1679	48.3514	36.2847	78.5931	29.044	32.019
chr7:76050200:76051149	chr7	76050200	76051149	.	950	-1.09812	6.31698	6.38836e-05	0.00220922	97.508	52.9431	84.651	110.396	39.8284	85.1901	115.017	56.1898	62.4948	102.64	55.7296	89.1063	116.207	41.9247	89.6738	121.07	59.1472	65.784
chr2:102421622:102423045	chr2	102421622	102423045	.	1424	-4.29552	3.93054	6.52423e-05	0.00224452	7.29032	2.71503	23.0866	9.32925	0	27.6868	16.9404	0	35.9345	5.11961	1.90662	16.2125	6.55144	0	19.443	11.8964	0	25.2349
chr14:35628867:35629759	chr14	35628867	35629759	.	893	-1.2447	5.9079	6.59285e-05	0.00226273	92.0403	33.9379	50.0211	76.1889	27.6586	67.0872	74.8946	38.9007	65.6196	103.069	38.0043	56.0146	85.3179	30.9727	75.1256	83.8685	43.5618	73.4822
chr17:43388998:43390585	chr17	43388998	43390585	.	1588	-1.39234	5.80116	6.60275e-05	0.00226279	92.9516	28.5078	44.2494	85.5182	15.4888	69.2169	60.629	41.988	48.9543	58.5337	17.952	27.8649	53.8528	9.75368	43.5875	38.1795	26.4408	30.8276
chr7:99160207:99161988	chr7	99160207	99161988	.	1782	-1.12326	6.29589	6.60869e-05	0.00226279	111.177	29.8653	88.4988	97.1797	55.3173	87.3198	88.2686	48.4715	86.972	62.3891	16.7594	49.6626	54.5341	31.0422	49.001	49.5335	27.2006	48.8058
chr15:48751802:48752915	chr15	48751802	48752915	.	1114	-1.42128	5.77147	6.67898e-05	0.00227875	91.129	36.6529	51.9449	56.753	12.1698	51.114	78.461	33.6522	65.6196	81.8034	32.9021	46.6292	50.9452	10.9244	45.8833	70.4318	30.2084	58.9045
chr3:196519410:196520630	chr3	196519410	196520630	.	1221	-2.41961	4.51089	6.6714e-05	0.00227875	30.9839	12.2176	31.7441	33.4298	1.10635	10.6488	41.9053	6.79218	22.9148	25.3758	10.0063	25.9985	27.3791	0.906098	8.72134	34.3205	5.5628	18.7672
chr4:95428090:95429155	chr4	95428090	95429155	.	1066	-1.54276	5.36131	6.72854e-05	0.00229295	55.5887	10.8601	47.1352	50.5335	16.5952	45.7897	52.6045	23.4639	52.5998	52.147	10.1877	44.2169	47.4048	15.5677	42.9547	49.3476	22.0112	49.3432
chr3:185262762:185263525	chr3	185262762	185263525	.	764	-2.57008	4.22995	6.79893e-05	0.00230876	44.6532	8.14509	19.2389	33.4298	2.21269	9.58388	19.6153	5.86597	13.0198	58.4466	10.6611	25.1818	43.7563	2.89619	12.5443	25.6744	7.67797	17.0416
chr3:72773357:72773766	chr3	72773357	72773766	.	410	-1.66639	5.50059	1.83022e-05	0.000868873	79.2822	16.2902	19.2389	86.2956	35.4031	43.6599	68.6534	22.2289	23.4356	193.371	39.7322	46.9241	210.477	86.3489	106.488	167.447	54.2169	57.1599
chr14:93768067:93768834	chr14	93768067	93768834	.	768	-3.92451	3.70916	6.83778e-05	0.00231922	11.8468	0	13.4672	13.2164	0	11.7136	18.7237	1.54368	31.2474	15.4255	0	17.5354	17.2089	0	15.2521	24.3798	2.01	40.6867
chr17:58450054:58450907	chr17	58450054	58450907	.	854	-1.52799	5.57993	6.99658e-05	0.00236752	83.8387	25.7928	55.7927	40.4268	29.8713	50.0492	84.7022	18.8329	29.6851	98.1718	30.2023	65.3311	47.3381	34.9781	58.6056	99.1829	22.0525	34.76
chr8:17663181:17663813	chr8	17663181	17663813	.	633	-1.93324	4.95673	7.01693e-05	0.00236885	58.3226	12.2176	12.5053	31.0975	11.0635	18.1029	64.1954	15.4368	41.6632	92.1368	19.3012	19.7556	49.1272	17.4778	28.5986	101.414	24.3867	65.8187
chr3:11288002:11288670	chr3	11288002	11288670	.	669	-3.20147	3.81963	7.16469e-05	0.00240747	31.8952	5.43006	6.7336	34.9847	1.10635	10.6488	16.9404	2.77862	4.16632	47.6759	8.11668	10.0652	52.294	1.65373	15.9174	25.322	4.15339	6.22769
chr3:11227170:11228083	chr3	11227170	11228083	.	914	-2.07146	4.70464	7.23008e-05	0.00241818	41.9193	10.8601	13.4672	27.9878	6.63807	29.8165	43.6885	9.26206	36.9761	45.8636	11.882	14.7344	30.6212	7.26266	32.622	47.7993	10.1335	40.4553
chr11:48014535:48015272	chr11	48014535	48015272	.	738	-0.937057	6.98078	7.39426e-05	0.00246737	133.96	69.2333	110.624	192.805	101.784	133.109	184.562	93.8556	103.116	181.517	93.812	149.896	261.253	137.918	180.365	250.084	127.176	139.724
chr10:3893501:3894997	chr10	3893501	3894997	.	1497	-0.727142	8.70611	2.20121e-05	0.000997422	523.08	310.871	360.729	563.642	344.073	379.096	584.891	352.885	326.015	349.419	207.663	240.968	376.515	229.842	253.237	390.709	235.728	217.779
chr17:38336194:38336941	chr17	38336194	38336941	.	748	-2.30078	4.52238	7.50484e-05	0.00249562	45.5645	6.78758	25.0105	24.878	9.95711	12.7785	29.4229	4.63103	33.8514	60.9151	9.0743	33.4365	33.2594	13.3116	17.0836	39.3354	6.19122	45.2558
chr3:66522831:66523286	chr3	66522831	66523286	.	456	-3.48961	3.79863	7.79358e-05	0.0025709	30.0726	1.35752	17.315	22.5457	5.53173	3.19463	25.8565	0.926206	6.24948	65.9486	2.97701	37.9715	49.4423	12.131	7.00576	56.7028	2.03115	13.705
chr20:62533755:62534684	chr20	62533755	62534684	.	930	-0.980131	6.63088	7.8514e-05	0.00258702	163.121	61.0882	83.6891	133.719	63.0617	89.4496	116.8	81.5061	85.4096	175.399	65.6862	89.9883	143.784	67.8083	96.1823	125.591	87.641	91.8383
chr5:37533869:37534347	chr5	37533869	37534347	.	479	-2.22788	4.63161	7.96289e-05	0.0026148	33.7177	9.50261	12.5053	49.756	2.21269	7.45413	49.0381	13.8931	29.1643	70.3919	19.8384	26.107	103.875	4.6194	15.5619	102.376	29.0044	60.8857
chr1:3081743:3082902	chr1	3081743	3082902	.	1160	-1.3479	5.49697	0.000294663	0.00704068	96.5967	23.0778	22.1247	90.9602	28.765	31.9463	37.4473	34.2696	27.0811	83.2731	19.8946	19.073	78.414	24.7974	27.5399	32.2822	29.5428	23.3458
chr8:6459964:6460531	chr8	6459964	6460531	.	568	-2.17593	4.59899	8.25124e-05	0.00269112	25.5161	4.07255	25.9725	25.6555	5.53173	45.7897	22.2901	5.86597	43.2256	44.9227	7.16998	45.7262	45.168	9.73896	80.6156	39.2431	10.3274	76.1014
chr15:63188389:63189785	chr15	63188389	63189785	.	1397	-0.953462	6.96754	8.31465e-05	0.00270874	199.573	65.1607	109.662	129.055	89.614	97.9686	184.562	104.353	131.76	142.858	46.6433	78.4979	92.3799	64.1475	70.1278	132.113	74.6976	94.3164
chr1:247691736:247692968	chr1	247691736	247692968	.	1233	-1.32344	5.68737	8.52469e-05	0.00276779	92.9516	31.2229	44.2494	72.3017	28.765	41.5302	56.171	28.7124	54.1622	75.3865	25.3227	35.8876	58.6389	23.3293	33.6822	45.5563	23.2866	43.9272
chr14:36138958:36139582	chr14	36138958	36139582	.	625	-2.63037	4.42986	6.29618e-05	0.0021911	36.4516	14.9327	15.3911	38.0945	5.53173	8.51901	58.8458	3.70482	1.56237	58.3226	23.8923	24.6258	60.9511	8.85076	13.6304	94.1532	5.92772	2.49979
chr15:41137664:41138652	chr15	41137664	41138652	.	989	-2.07558	4.64415	8.6637e-05	0.00280263	27.3387	9.50261	27.8964	52.8658	6.63807	26.6219	39.2305	11.1145	10.9366	27.6428	9.6083	28.2066	53.4538	6.7119	26.918	39.6668	11.2381	11.0582
chr17:39929318:39929750	chr17	39929318	39929750	.	433	-3.18302	3.9281	8.72459e-05	0.00281371	37.3629	1.35752	14.4292	27.9878	1.10635	15.9731	4.45801	3.70482	16.6653	86.2884	3.13514	33.3237	64.6369	2.55507	36.8895	10.2956	8.55618	38.488
chr4:95444543:95445354	chr4	95444543	95445354	.	812	-2.30977	4.42555	8.76777e-05	0.00282132	28.25	8.14509	32.7061	36.5396	4.42538	27.6868	21.3985	5.2485	16.6653	34.7906	10.0309	40.2784	44.9995	5.44998	34.097	26.3528	6.46367	20.5238
chr1:29286589:29287135	chr1	29286589	29287135	.	547	-1.25523	5.5143	0.000262991	0.00647695	67.4355	35.2954	24.0486	71.5243	23.2333	30.8814	81.1358	33.0347	31.2474	123.282	64.5254	43.9645	130.757	42.474	56.4559	148.329	60.3925	57.1251
chr7:143169049:143169875	chr7	143169049	143169875	.	827	-1.15837	6.36305	8.84791e-05	0.00283762	125.758	73.3058	86.5749	116.616	35.4031	57.5033	89.1602	43.5317	99.471	152.065	88.6407	104.686	141.011	42.809	69.5324	107.812	52.6381	120.279
chr2:182903040:182904349	chr2	182903040	182904349	.	1310	-1.05258	6.56459	8.90166e-05	0.00285169	140.339	70.5908	92.3466	101.067	49.7856	64.9574	137.307	62.0558	119.261	107.129	53.8861	70.4936	77.1503	38.0042	49.5858	104.814	47.3709	91.0389
chr16:85270123:85270807	chr16	85270123	85270807	.	685	-1.81137	5.02836	9.07829e-05	0.00289397	58.3226	17.6477	32.7061	42.7591	4.42538	18.1029	54.3878	19.7591	31.2474	85.1424	25.7631	47.7461	62.422	6.46041	26.4276	79.3982	28.8454	45.6167
chr9:139111839:139112749	chr9	139111839	139112749	.	911	-4.05349	3.55411	9.08376e-05	0.00289397	15.4919	1.35752	3.84777	10.8841	0	8.51901	33.8809	1.54368	16.1445	17.0054	1.49014	4.22368	11.9475	0	9.35127	37.1909	1.69449	17.7217
chr4:187750661:187751601	chr4	187750661	187751601	.	941	-1.36917	5.74013	9.17906e-05	0.00291626	70.1693	14.9327	39.4397	80.8535	23.2333	53.2438	81.1358	44.4579	57.8077	74.5689	15.8689	41.9125	85.923	24.69	56.5821	86.223	47.2454	61.4322
chr7:106819745:106821456	chr7	106819745	106821456	.	1712	-1.04525	6.31322	9.18404e-05	0.00291626	104.798	52.9431	83.6891	97.9572	50.8919	85.1901	107.884	47.5453	71.8691	61.214	30.9247	48.8838	57.218	29.7266	49.7606	63.0163	27.7718	41.9796
chr13:30499508:30500087	chr13	30499508	30500087	.	580	-2.81951	3.97127	9.24683e-05	0.00292654	25.5161	1.35752	16.353	34.2073	2.21269	5.32438	24.0733	6.17471	11.4574	43.9933	2.34054	28.1949	58.978	3.81498	9.17996	41.5056	10.646	19.7541
chr3:185503860:185504630	chr3	185503860	185504630	.	771	-6.10059	3.51793	9.31895e-05	0.00294614	5.46774	0	26.9344	8.55182	0	30.8814	4.45801	0	15.1029	7.09175	0	34.9344	11.0919	0	40.0537	5.78212	0	19.5887
chr4:106830716:106831652	chr4	106830716	106831652	.	937	-1.93552	5.19675	3.28952e-05	0.00135447	61.0564	24.4353	19.2389	76.1889	21.0206	6.38926	64.1954	10.8057	33.3306	65.1616	26.0782	20.5324	81.3115	22.4339	6.81884	68.5116	11.5323	35.5716
chr2:64089843:64090718	chr2	64089843	64090718	.	876	-1.21464	5.92199	9.49949e-05	0.00297713	101.153	36.6529	52.9069	85.5182	39.8284	57.5033	63.3038	32.4172	63.0156	115.472	41.8412	60.396	97.6235	45.4663	65.643	72.2646	37.006	71.9357
chr10:104363945:104365007	chr10	104363945	104365007	.	1063	-0.971654	6.78051	9.9551e-05	0.00309638	158.564	59.7307	140.444	109.619	59.7427	119.266	142.656	84.5935	101.033	149.167	56.1907	132.12	103.122	56.2019	112.198	134.202	79.58	95.0455
chr10:123513244:123514625	chr10	123513244	123514625	.	1382	-1.28309	5.75959	0.000100342	0.00311428	84.75	35.2954	37.5158	61.4176	34.2967	42.595	90.9435	29.0211	58.3285	61.3242	25.5394	27.146	44.4411	24.8167	30.8213	65.8057	20.9994	42.2059
chr17:18986444:18987566	chr17	18986444	18987566	.	1123	-2.51101	4.32896	0.00010149	0.0031453	33.7177	6.78758	12.5053	35.7621	12.1698	10.6488	34.7725	1.85241	19.79	30.0247	6.04415	11.1356	31.8452	10.8369	9.48242	30.9639	1.64952	17.6225
chr4:169226054:169226459	chr4	169226054	169226459	.	406	-3.13457	3.80141	0.000102085	0.00315819	34.629	1.35752	4.80972	17.8811	2.21269	14.9083	29.4229	4.3223	3.64553	85.2932	3.34363	11.8466	44.042	5.44998	36.7199	72.4702	10.646	8.97914
chr8:131107895:131109372	chr8	131107895	131109372	.	1478	-1.13674	6.14234	0.000102323	0.00316121	81.1048	54.3006	60.6024	101.067	32.084	58.5682	123.933	51.5588	58.8493	54.8747	36.7393	41.003	68.3809	21.7077	39.6266	83.8517	34.8842	39.8169
chr14:63937702:63938652	chr14	63937702	63938652	.	951	-1.58879	5.27238	0.000103315	0.00318259	67.4355	14.9327	41.3636	47.4237	13.2761	44.7248	57.9542	25.625	21.8732	70.9101	15.7021	43.4948	49.8672	13.9602	47.0292	60.9402	26.9454	23.0002
chr12:100970247:100970977	chr12	100970247	100970977	.	731	-1.62622	5.60333	4.35453e-06	0.000279931	90.2177	24.4353	32.7061	84.7407	30.9777	34.076	68.6534	24.0814	34.3722	123.417	33.4272	44.7416	115.924	42.3771	46.6156	93.9171	32.943	47.0207
chr10:101725631:101726827	chr10	101725631	101726827	.	1197	-1.10271	6.25149	0.000103452	0.00318342	84.75	44.798	116.395	98.7346	38.7221	86.2549	73.1114	37.357	92.1799	70.802	37.4252	97.2391	82.4851	32.3493	72.0593	61.0789	31.2088	77.0091
chr4:75578772:75580207	chr4	75578772	75580207	.	1436	-1.21824	5.88548	0.00010485	0.00321272	70.1693	39.3679	64.4502	96.4023	27.6586	57.5033	79.3526	37.9745	45.8296	48.8644	27.415	44.8818	67.1325	19.2609	40.0441	55.2595	26.4446	31.9147
chr6:10759449:10761127	chr6	10759449	10761127	.	1679	-0.90354	6.97692	0.000107416	0.00327397	200.484	96.3836	94.2705	145.381	97.3584	109.682	162.272	80.2712	134.364	119.407	57.4054	56.1468	86.5878	57.986	65.3259	96.6478	47.8089	80.0262
chr19:41221350:41222886	chr19	41221350	41222886	.	1537	-0.82988	7.40083	0.000107614	0.00327656	226.911	99.0986	197.198	188.917	142.719	156.537	229.142	119.789	147.384	147.633	64.4754	128.301	122.913	92.8553	101.846	149.084	77.9371	95.8905
chr20:7821780:7822712	chr20	7821780	7822712	.	933	-2.77272	4.74775	7.63839e-07	7.27639e-05	67.4355	12.2176	11.5433	40.4268	8.85076	21.2975	51.7129	4.63103	11.9782	72.2781	13.095	12.3723	43.3299	9.48635	22.8269	55.4265	4.96359	12.8383
chr10:82269317:82269818	chr10	82269317	82269818	.	502	-2.80006	4.07196	0.000108668	0.00329991	30.0726	1.35752	13.4672	20.2134	0	12.7785	35.6641	7.71839	15.6237	59.9055	2.70421	26.8271	40.2657	0	25.4552	71.044	15.3753	31.1229
chr1:192796014:192796525	chr1	192796014	192796525	.	512	-1.89471	4.96966	0.000110137	0.00332532	85.6613	16.2902	25.0105	29.5426	13.2761	26.6219	27.6397	10.1883	34.893	167.307	31.8168	48.8487	57.7005	25.93	51.9959	53.9837	19.899	68.1503
chr10:101503079:101504057	chr10	101503079	101504057	.	979	-1.78681	4.916	0.000110053	0.00332532	59.2339	8.14509	20.2008	46.6463	8.85076	15.9731	47.2549	22.8464	27.0811	60.5044	8.31981	20.6341	47.6469	9.04062	16.3158	48.2686	23.3365	27.662
chr2:32244020:32244667	chr2	32244020	32244667	.	648	-1.82096	4.96529	0.000110005	0.00332532	43.7419	25.7928	25.0105	48.9786	5.53173	21.2975	57.0626	12.6582	28.1227	67.503	39.8037	38.5965	75.5842	8.53662	32.8665	88.0595	19.5342	43.3992
chr4:126641197:126641754	chr4	126641197	126641754	.	558	-1.90196	4.81449	0.000112674	0.00338773	44.6532	6.78758	32.7061	31.0975	8.85076	46.8545	22.2901	9.5708	36.9761	80.0237	12.1641	58.613	55.7303	15.8616	83.9687	39.9463	17.152	66.2654
chr1:36473914:36474815	chr1	36473914	36474815	.	902	-3.33573	3.88977	0.000113065	0.00339595	29.1613	8.14509	2.88583	40.4268	0	14.9083	18.7237	1.85241	5.2079	32.3296	9.03004	3.19937	44.819	0	16.528	20.7579	2.05367	5.77373
chr2:162915237:162916409	chr2	162915237	162916409	.	1173	-2.72583	4.07025	0.000113191	0.0033962	41.0081	4.07255	6.7336	24.1006	5.53173	23.4273	24.9649	4.01356	5.72869	34.96	3.47191	5.7405	20.5461	4.71588	19.9721	21.2829	3.42162	4.8838
chr14:65724772:65726050	chr14	65724772	65726050	.	1279	-1.82154	6.63353	2.70521e-08	5.10347e-06	138.516	36.6529	101.966	199.024	77.4442	75.6062	158.705	31.491	61.4533	108.3	28.6575	79.7232	155.609	60.5506	59.1135	124.085	24.6216	48.0479
chr1:113123791:113124986	chr1	113123791	113124986	.	1196	-1.62424	5.42177	0.000117229	0.00349938	79.2822	25.7928	35.5919	76.9664	5.53173	38.3355	37.4473	28.4037	43.7464	66.2895	21.5659	29.7591	64.3531	4.62519	32.0531	31.3105	23.7489	36.5772
chr2:84524350:84524652	chr2	84524350	84524652	.	303	-2.86095	3.92831	0.000117236	0.00349938	25.5161	6.78758	6.7336	34.9847	2.21269	12.7785	19.6153	2.77862	12.499	84.2116	22.4012	22.2231	115.461	7.30261	42.1733	64.7368	9.17036	41.2507
chr1:17880210:17881116	chr1	17880210	17881116	.	907	-2.10335	4.72212	3.43135e-05	0.00139693	60.1451	12.2176	15.3911	47.4237	16.5952	17.038	40.1221	7.40965	9.37423	66.3122	13.4704	16.9692	52.2863	18.2968	18.785	44.2361	8.1694	10.3354
chr8:102619970:102620804	chr8	102619970	102620804	.	835	-1.90661	4.94517	0.000117787	0.00351221	61.9677	4.07255	15.3911	37.317	23.2333	26.6219	47.2549	11.4232	35.9345	74.2128	4.8773	18.4325	44.691	27.8243	31.8825	56.5927	13.6805	43.0354
chr17:79630418:79631646	chr17	79630418	79631646	.	1229	-1.41845	5.64402	3.95017e-05	0.00153663	90.2177	23.0778	23.0866	72.3017	28.765	38.3355	83.8106	37.0482	39.0593	73.4074	18.7777	18.7849	58.8297	23.4052	31.1925	68.1942	30.145	31.7813
chr1:10570404:10571760	chr1	10570404	10571760	.	1357	-1.36917	5.58702	0.000117938	0.00351307	67.4355	24.4353	54.8308	64.5273	14.3825	59.6331	57.0626	31.1823	45.3088	49.6945	18.0068	40.4059	47.5515	10.5987	43.9448	42.0505	22.9788	33.3889
chr8:42349863:42350925	chr8	42349863	42350925	.	1063	-1.72754	5.32782	1.85486e-05	0.000874817	71.9919	29.8653	24.0486	82.4084	11.0635	27.6868	54.3878	22.2289	24.4771	67.7252	28.0953	22.6233	77.5244	10.4078	26.0459	51.1644	20.9115	23.0265
chr9:132095925:132096800	chr9	132095925	132096800	.	876	-1.3133	5.75216	0.000118991	0.00352625	85.6613	44.798	48.0972	73.8566	26.5523	30.8814	75.7862	26.2425	59.8909	97.7868	51.1393	54.9055	84.3112	30.3108	35.2527	86.5139	29.9572	68.3686
chr6:71108398:71109597	chr6	71108398	71109597	.	1200	-0.717788	8.09565	0.000120173	0.00355761	286.145	194.125	310.708	387.164	202.461	267.284	317.41	205.309	277.581	238.454	161.771	258.923	322.637	168.718	222.737	264.509	171.091	231.318
chr21:37513847:37514880	chr21	37513847	37514880	.	1034	-1.04484	6.57349	0.00012122	0.00358126	128.492	70.5908	52.9069	117.393	66.3807	111.812	139.09	52.7938	104.679	124.267	68.2696	51.1672	113.533	64.198	108.135	134.516	51.0578	101.237
chr22:30707514:30708426	chr22	30707514	30708426	.	913	-2.00286	4.68774	0.000122982	0.00362219	28.25	5.43006	21.1628	37.317	16.5952	30.8814	53.4961	8.02712	18.2277	30.9419	5.94749	23.1794	40.873	18.1765	33.8241	58.5938	8.79203	19.9646
chr20:45962779:45963186	chr20	45962779	45963186	.	408	-1.80655	5.04175	0.000128755	0.00377682	37.3629	6.78758	38.4777	45.0914	3.31904	40.4653	43.6885	20.3765	45.3088	91.5757	16.6362	94.3082	110.518	8.13489	99.1796	107.08	49.9425	111.051
chr8:95071597:95072015	chr8	95071597	95072015	.	419	-1.4925	5.55773	0.00013179	0.0038393	61.9677	10.8601	45.2113	40.4268	34.2967	64.9574	83.8106	20.3765	48.9543	147.894	25.9191	107.903	96.4839	81.8537	155.03	200.025	48.6314	116.836
chr12:1239358:1240199	chr12	1239358	1240199	.	842	-1.44785	5.55433	0.000133362	0.00386568	46.4758	27.1503	61.5644	62.9725	8.85076	60.6979	49.0381	21.6115	70.3067	55.1969	32.245	73.1168	74.7892	10.5116	72.0878	58.2401	25.6668	83.4996
chr14:91435958:91437233	chr14	91435958	91437233	.	1276	-0.857409	7.24915	0.000133392	0.00386568	241.492	114.031	154.873	181.143	111.741	173.575	146.223	91.3857	142.176	189.257	89.3662	121.374	141.962	87.5712	136.03	114.595	71.6189	111.423
chr2:228174649:228176045	chr2	228174649	228176045	.	1397	-1.77552	5.63185	5.93164e-06	0.000358663	112.089	35.2954	42.3255	89.4054	11.0635	29.8165	57.0626	28.4037	27.6019	80.2353	25.2651	30.2974	63.9981	7.91944	21.3433	40.8465	20.3319	19.758
chr16:1738409:1739705	chr16	1738409	1739705	.	1297	-2.05538	4.70769	0.000133873	0.00387187	53.7661	5.43006	12.5053	30.3201	4.42538	36.2058	29.4229	13.8931	34.3722	41.4542	4.18663	9.64169	23.3771	3.41201	27.915	22.6853	10.7117	26.5013
chr9:80540807:80541641	chr9	80540807	80541641	.	835	-2.01875	4.7197	0.000138193	0.00397688	32.8064	16.2902	27.8964	30.3201	5.53173	18.1029	45.4717	6.79218	40.1009	39.2892	19.5092	33.4088	36.3115	6.62482	21.6801	54.4572	8.13435	48.025
chr10:97026099:97027021	chr10	97026099	97027021	.	923	-1.3139	5.66584	0.000138686	0.00398707	57.4113	32.5804	53.8688	89.4054	26.5523	26.6219	81.1358	32.1085	43.2256	62.2007	35.2983	58.3628	96.8639	28.7674	28.8428	87.9045	34.7871	46.8316
chr19:51853280:51854333	chr19	51853280	51854333	.	1054	-3.6247	3.87686	0.000140193	0.00402639	14.5806	4.07255	16.353	36.5396	3.31904	23.4273	15.1572	0	7.29106	13.8336	3.8639	15.5152	34.6675	3.14899	22.227	14.3807	0	6.91752
chr4:87898732:87899310	chr4	87898732	87899310	.	579	-1.82922	4.74333	0.000140869	0.00403378	52.8548	10.8601	29.8202	31.875	8.85076	21.2975	35.6641	12.9669	23.4356	91.2864	18.7567	51.503	55.0517	15.2863	36.7833	61.596	22.3953	40.4759
chr8:126203432:126204521	chr8	126203432	126204521	.	1090	-0.930087	7.19934	0.000141327	0.00404287	164.944	119.461	202.008	151.6	46.4665	176.769	160.488	85.8284	201.546	151.324	109.598	185.329	139.083	42.6298	162.174	147.237	78.7417	184.904
chr2:118870302:118870921	chr2	118870302	118870921	.	620	-1.80801	4.96922	0.000143183	0.00408259	34.629	4.07255	45.2113	36.5396	18.8079	29.8165	49.0381	10.8057	39.0593	55.8533	6.56862	72.9215	58.9348	30.3353	48.0912	79.0938	17.4286	62.9988
chr20:62313375:62314427	chr20	62313375	62314427	.	1053	-0.940471	6.61948	0.000143549	0.00408491	116.645	48.8706	103.89	127.5	61.9554	112.877	121.258	75.0227	102.596	110.774	46.4108	98.6609	121.082	58.837	107.195	115.155	71.2466	97.4318
chr17:6771723:6772348	chr17	6771723	6772348	.	626	-1.31788	5.73188	0.000145196	0.00409671	92.0403	28.5078	69.2599	58.3078	28.765	30.8814	66.8702	29.3299	60.4117	147.029	45.5397	110.639	93.1435	45.9505	49.3313	106.821	46.8528	96.5043
chr2:47649116:47650296	chr2	47649116	47650296	.	1181	-1.46417	5.52643	5.33454e-05	0.00193924	76.5484	29.8653	41.3636	93.2925	23.2333	23.4273	57.9542	29.0211	26.5603	64.8166	25.2882	35.0242	78.9945	19.6725	19.8368	49.0721	24.5734	22.4897
chr12:118422749:118425408	chr12	118422749	118425408	.	2660	-0.668002	8.72964	0.00014552	0.00410185	508.5	396.394	449.228	565.197	318.628	312.009	563.493	318.615	375.49	191.165	149.02	168.883	212.48	119.785	117.296	211.839	119.78	141.162
chr4:95562937:95563894	chr4	95562937	95563894	.	958	-1.02834	6.52817	0.000148238	0.00416219	112.089	40.7255	110.624	90.9602	51.9982	173.575	87.377	48.4715	102.075	117.003	42.5109	115.473	94.9481	54.2779	181.185	91.2078	50.5965	106.55
chr10:32176859:32177192	chr10	32176859	32177192	.	334	-2.3596	4.26367	0.000150028	0.00420836	22.7823	5.43006	27.8964	23.3231	2.21269	27.6868	21.3985	4.93977	23.9564	68.2103	16.2577	83.522	69.8298	6.62482	82.8945	64.0672	14.7897	71.7256
chr4:30822464:30824559	chr4	30822464	30824559	.	2096	-0.751235	7.83269	0.000151351	0.00423723	218.71	165.617	209.704	315.64	165.952	210.845	340.592	186.167	224.461	104.346	79.0157	100.049	150.592	79.1755	100.594	162.496	88.8203	107.09
chr2:56968551:56969565	chr2	56968551	56969565	.	1015	-2.49165	4.18437	0.000151717	0.00424336	28.25	6.78758	13.4672	39.6493	4.42538	9.58388	16.9404	4.3223	25.5187	27.8325	6.68727	13.2682	39.0634	4.35998	9.44225	16.6901	4.25842	25.1416
chr2:235935690:235936806	chr2	235935690	235936806	.	1117	-1.61952	5.21782	0.000154607	0.00431167	79.2822	24.4353	14.4292	41.9816	23.2333	34.076	58.8458	13.5844	32.8098	70.9778	21.8758	12.9178	37.5843	20.7997	30.5067	52.682	12.1615	29.3731
chr17:39653081:39653559	chr17	39653081	39653559	.	479	-4.01908	3.56753	0.000155513	0.00432441	35.5403	1.35752	19.2389	9.32925	0	14.9083	6.24122	1.23494	7.29106	74.1969	2.83406	40.1647	19.4765	0	31.1237	13.0297	2.57817	15.2214
chr12:120912216:120913129	chr12	120912216	120913129	.	914	-1.56466	5.12427	0.00015797	0.00438005	56.5	16.2902	28.8583	44.314	15.4888	40.4653	57.9542	20.3765	20.8316	61.8162	17.823	31.5736	48.4835	16.9462	44.2727	63.4072	22.2938	22.7917
chr22:18330253:18330706	chr22	18330253	18330706	.	454	-3.39473	3.72779	0.000159736	0.00441147	12.7581	2.71503	15.3911	17.1036	0	9.58388	22.2901	1.85241	22.9148	28.1015	5.98024	33.9011	37.6732	0	21.1099	49.0971	4.0802	50.4731
chr12:64371686:64372787	chr12	64371686	64372787	.	1102	-1.25443	5.98944	0.000161426	0.00443754	69.258	33.9379	80.8033	110.396	27.6586	30.8814	96.2931	49.7064	57.8077	62.8476	30.7966	73.3242	100.178	25.0986	28.0231	87.3803	45.1056	52.4571
chr18:55930134:55931287	chr18	55930134	55931287	.	1154	-1.64603	5.39689	0.00016224	0.00445143	79.2822	27.1503	53.8688	43.5365	7.74442	53.2438	26.7481	14.5106	59.8909	68.7021	23.5271	46.6801	37.7266	6.71094	46.1385	23.1786	12.5741	51.8985
chr5:95046245:95049067	chr5	95046245	95049067	.	2823	-0.799407	7.36401	0.000167645	0.00459099	188.637	126.249	154.873	211.463	106.209	179.964	240.733	133.682	127.594	66.8215	44.7215	54.8611	74.9072	37.6228	63.7492	85.2755	47.3547	45.1979
chr2:65586033:65586956	chr2	65586033	65586956	.	924	-2.26787	4.45319	0.000170924	0.00467193	29.1613	14.9327	26.9344	31.875	2.21269	10.6488	41.0137	5.55724	21.8732	31.5598	16.1609	29.1498	34.4967	2.39469	11.5246	44.3871	6.01433	23.6723
chr22:45641717:45643180	chr22	45641717	45643180	.	1464	-1.06641	6.3451	0.000174896	0.00476694	133.048	65.1607	81.7652	94.07	53.1046	50.0492	105.209	43.8404	92.1799	90.88	44.5087	55.8505	64.2555	36.2736	34.1866	71.8641	29.9456	62.9644
chr17:78806558:78807613	chr17	78806558	78807613	.	1056	-1.27568	5.9597	0.000177234	0.0048145	72.9032	23.0778	101.004	75.4115	35.4031	109.682	41.0137	21.6115	67.7027	69.0371	21.8539	95.6478	71.4124	33.5256	103.866	38.8387	20.4654	64.1124
chr4:11633760:11634283	chr4	11633760	11634283	.	524	-2.60176	4.7592	1.17104e-06	0.000100898	51.9435	12.2176	16.353	45.0914	7.74442	8.51901	60.629	7.10091	20.8316	99.1289	23.3161	31.2081	86.0523	14.7794	16.2576	115.704	13.5514	39.755
chr11:19254302:19255138	chr11	19254302	19255138	.	837	-2.44218	5.2471	1.89642e-07	2.33924e-05	51.9435	12.2176	27.8964	69.192	8.85076	12.7785	94.5099	16.363	33.3306	62.0592	14.5969	33.329	82.6666	10.5744	15.267	112.915	19.5496	39.8215
chr13:20419862:20420462	chr13	20419862	20420462	.	601	-1.30237	5.68985	0.000182133	0.00491776	58.3226	14.9327	64.4502	81.631	24.3396	48.9843	66.8702	38.9007	51.0375	97.0425	24.8464	107.238	135.825	40.4985	81.5046	111.265	64.7266	84.9209
chr2:100901995:100902793	chr2	100901995	100902793	.	799	-2.91813	4.11904	0.000182846	0.0049324	54.6774	5.43006	25.0105	10.1067	0	17.038	11.5908	4.01356	16.1445	68.4323	6.79607	31.3023	12.6492	0	21.3242	14.5067	5.02323	20.2059
chr4:11506767:11508056	chr4	11506767	11508056	.	1290	-1.10742	6.12584	0.000184952	0.00496975	66.5242	43.4405	70.2219	97.9572	36.5094	76.6711	118.583	49.3977	55.7246	51.5691	33.6748	54.4356	75.9358	28.3019	59.4349	91.9249	38.2928	43.1973
chr4:71449912:71450616	chr4	71449912	71450616	.	705	-1.24367	5.69569	0.000185092	0.00496975	71.0806	28.5078	33.668	81.631	28.765	61.7628	71.3282	35.5046	40.6216	100.824	40.4366	47.7561	115.789	40.8014	87.6068	101.175	50.3611	57.6194
chr12:132812431:132815589	chr12	132812431	132815589	.	3159	-3.14009	5.91249	1.131e-12	1.41936e-09	125.758	6.78758	56.7547	103.399	14.3825	57.5033	107.884	14.5106	41.6632	39.8094	2.14865	17.966	32.7316	4.55286	18.203	34.1513	4.5934	13.1887
chr2:208028165:208028863	chr2	208028165	208028863	.	699	-1.86829	5.02894	2.14484e-05	0.000987379	45.5645	13.5752	23.0866	54.4207	13.2761	13.8434	74.8946	19.1416	21.8732	65.1853	19.4208	33.0281	77.855	18.9931	19.8046	107.145	27.3843	31.2921
chr20:382312:382984	chr20	382312	382984	.	673	-1.44664	5.35734	0.000188907	0.00505339	43.7419	21.7202	33.668	83.9633	32.084	25.557	63.3038	18.2154	33.3306	64.9954	32.2738	50.0268	124.76	47.6731	37.9748	94.0621	27.066	49.5254
chr11:129994076:129994438	chr11	129994076	129994438	.	363	-2.86832	3.88756	0.000192859	0.00513057	24.6048	4.07255	12.5053	18.6585	0	8.51901	38.3389	5.55724	7.81186	67.7819	11.2191	34.4498	51.4009	0	23.4683	105.617	15.3092	21.5203
chr8:38861898:38862980	chr8	38861898	38862980	.	1083	-1.98022	4.84129	0.000197025	0.00523177	64.7016	13.5752	15.3911	23.3231	7.74442	15.9731	39.2305	10.8057	52.079	59.7429	12.5348	14.2115	21.5357	7.15089	14.749	36.2239	9.9776	48.0878
chr1:162351209:162351676	chr1	162351209	162351676	.	468	-1.86352	4.6013	0.000199763	0.00528503	42.8306	8.14509	21.1628	41.9816	9.95711	10.6488	36.5557	13.5844	19.2692	91.5184	17.404	45.2196	89.7044	21.2759	22.7538	78.1105	29.0264	41.1736
chr5:169122712:169123537	chr5	169122712	169123537	.	826	-1.7129	4.92648	0.000200827	0.00529917	55.5887	10.8601	28.8583	45.0914	8.85076	29.8165	24.9649	16.363	38.5385	67.2987	13.1478	34.9374	54.5901	10.7152	36.0975	30.2238	19.8099	46.6568
chr5:37533120:37533608	chr5	37533120	37533608	.	489	-3.68084	3.48148	0.000201083	0.00530052	13.6694	2.71503	8.65749	20.2134	1.10635	7.45413	28.5313	1.23494	4.68711	27.9537	5.55221	17.7045	41.3362	2.26247	15.2436	58.3462	2.52544	9.5851
chr19:4694343:4695080	chr19	4694343	4695080	.	738	-1.75943	4.76269	0.000202446	0.00533157	31.8952	8.14509	31.7441	32.6524	9.95711	30.8814	39.2305	11.4232	34.3722	43.2184	11.0367	43.0137	44.2444	13.492	41.8447	53.1579	15.4786	46.5747
chr6:3912967:3914027	chr6	3912967	3914027	.	1061	-1.28506	5.65386	0.000204151	0.00536181	63.7903	35.2954	33.668	80.0761	17.7015	48.9843	70.4366	33.6522	55.2038	60.1228	33.2662	31.7323	75.4723	16.6838	46.168	66.387	31.7174	52.03
chr11:107432079:107432903	chr11	107432079	107432903	.	825	-0.838464	7.16007	0.000204528	0.00536681	202.306	80.0934	144.292	162.485	137.187	138.434	180.995	89.2245	139.051	245.22	97.0829	174.899	196.951	166.287	167.799	219.388	108.151	168.547
chr6:21022459:21023864	chr6	21022459	21023864	.	1406	-0.886194	6.86312	0.000207577	0.00542707	161.298	73.3058	94.2705	139.939	64.168	109.682	164.055	107.44	118.74	114.721	52.1379	67.0487	99.5297	45.6387	78.0101	116.682	76.4153	84.4525
chr4:95393222:95394023	chr4	95393222	95394023	.	802	-5.11432	3.33561	0.000214692	0.00558276	17.3145	0	17.315	7.77438	1.10635	12.7785	8.91602	0	13.0198	21.5892	0	21.5898	9.69374	1.37948	15.9333	11.1172	0	16.2341
chr2:61825183:61826474	chr2	61825183	61826474	.	1292	-1.00455	6.42839	0.000218867	0.00566073	107.532	35.2954	68.298	123.613	54.2109	93.7091	113.234	75.0227	89.0552	83.2293	27.3184	52.8622	95.6754	41.9589	72.5302	87.642	58.0671	68.9281
chr3:141658573:141660324	chr3	141658573	141660324	.	1752	-0.966427	6.41637	0.000219518	0.00566741	114.823	61.0882	71.1838	94.07	54.2109	67.0872	142.656	63.2908	86.4512	65.538	34.8677	40.63	53.6929	30.9423	38.2918	81.4249	36.1249	49.3443
chr12:23127378:23128345	chr12	23127378	23128345	.	968	-1.35366	5.65319	0.000219973	0.00567408	87.4838	20.3627	20.2008	64.5273	29.8713	61.7628	67.7618	33.0347	53.6414	90.3759	21.0359	20.8686	66.6605	30.8588	63.8045	70.0018	34.1267	55.4147
chr19:869325:870137	chr19	869325	870137	.	813	-3.28492	3.71716	0.000220563	0.00567914	18.2258	2.71503	19.2389	13.2164	0	20.2326	16.9404	1.85241	13.5405	22.418	3.33952	23.664	16.2564	0	24.8864	20.837	2.27849	16.655
chr20:5377688:5379048	chr20	5377688	5379048	.	1361	-0.776185	7.69173	0.000222319	0.00571927	270.653	122.176	227.019	239.451	112.847	194.872	242.516	194.812	241.126	198.863	89.7696	166.803	175.937	82.915	143.183	178.189	143.139	177.168
chr7:139372550:139373546	chr7	139372550	139373546	.	997	-2.74961	3.98449	0.00022638	0.00579275	17.3145	1.35752	17.315	26.4329	0	18.1029	19.6153	5.55724	21.8732	17.3666	1.3616	17.3671	26.5124	0	18.1574	19.6743	5.57396	21.939
chr19:11843436:11844156	chr19	11843436	11844156	.	721	-3.36797	3.74166	0.000229803	0.00587213	16.4032	6.78758	1.92389	32.6524	2.21269	12.7785	31.2061	0.617471	4.16632	22.7507	9.41411	2.66836	45.2876	3.06892	17.7233	43.2817	0.856409	5.77853
chr6:11009219:11010299	chr6	11009219	11010299	.	1081	-1.89592	4.75599	0.000231319	0.00588692	41.9193	9.50261	32.7061	16.3262	11.0635	39.4004	38.3389	6.48344	34.893	38.7783	8.79057	30.2554	15.1029	10.2345	36.4481	35.4661	5.99764	32.2784
chr7:116105321:116106613	chr7	116105321	116106613	.	1293	-1.10168	5.98847	0.000232628	0.00591072	92.9516	33.9379	54.8308	87.8505	32.084	62.8277	88.2686	54.3374	49.9959	71.8883	26.2474	42.4059	67.9431	24.8136	48.5906	68.2665	42.0243	38.6666
chr14:54307078:54307989	chr14	54307078	54307989	.	912	-0.945262	6.63022	0.000238027	0.00602667	123.935	50.2281	111.585	122.835	86.295	80.9306	157.814	71.6266	72.9106	135.894	55.0746	122.352	134.688	94.6217	88.7397	173.041	78.538	79.9459
chr6:155491895:155493109	chr6	155491895	155493109	.	1215	-0.746532	7.67289	0.000239958	0.00606494	221.443	145.254	198.16	275.213	128.336	199.132	224.684	154.676	274.977	182.258	119.551	163.095	226.513	105.626	163.894	184.925	127.306	226.319
chr1:94071152:94072051	chr1	94071152	94072051	.	900	-1.90688	4.68048	0.000241598	0.00610104	32.8064	8.14509	34.63	31.875	15.4888	28.7516	36.5557	5.2485	24.9979	36.4516	9.0501	38.4777	35.4166	17.2098	31.9463	40.6174	5.83167	27.7755
chr2:174016418:174016985	chr2	174016418	174016985	.	568	-1.45992	5.27334	0.000247815	0.00621454	73.8145	20.3627	39.4397	43.5365	14.3825	22.3624	66.8702	29.0211	24.4771	129.955	35.8499	69.4361	76.6488	25.3213	39.3704	117.729	51.0935	43.0936
chr2:98583056:98584008	chr2	98583056	98584008	.	953	-1.60344	5.0912	0.000249738	0.00625732	29.1613	19.0052	40.4016	43.5365	11.0635	45.7897	43.6885	10.1883	50.5167	30.5995	19.9425	42.3942	45.6837	11.6091	48.0479	45.8431	10.6907	53.008
chr19:15240833:15241584	chr19	15240833	15241584	.	752	-3.25533	3.67623	0.000251251	0.00628648	10.9355	0	18.2769	29.5426	1.10635	8.51901	23.1817	3.70482	6.24948	14.5419	0	24.3044	39.2854	1.4712	11.3285	30.8267	4.92663	8.31048
chr6:31759974:31761327	chr6	31759974	31761327	.	1354	-1.63819	5.17775	0.000254615	0.00633165	39.1855	27.1503	23.0866	43.5365	6.63807	38.3355	72.2198	16.6717	45.3088	28.9405	20.0519	17.0507	32.154	4.90257	28.3128	53.3381	12.3129	33.4629
chr6:3912050:3912780	chr6	3912050	3912780	.	731	-1.60537	5.03916	0.000257703	0.00639582	67.4355	10.8601	29.8202	48.2012	21.0206	33.0112	28.5313	15.128	28.6435	92.251	14.8565	40.7938	65.9386	28.7559	45.1589	39.0305	20.695	39.184
chr14:65721630:65722347	chr14	65721630	65722347	.	718	-2.23418	4.28653	0.000258786	0.00641718	46.4758	6.78758	19.2389	19.4359	9.95711	9.58388	30.3145	4.63103	16.6653	64.7295	9.45345	26.7951	27.0696	13.8678	13.348	42.2207	6.4499	23.2107
chr2:120891847:120892708	chr2	120891847	120892708	.	862	-3.31269	3.6944	0.000259286	0.00642405	10.9355	1.35752	24.0486	20.9908	0	10.6488	13.374	2.16115	18.7485	12.6862	1.57484	27.8986	24.3513	0	12.3535	15.5151	2.50713	21.7499
chr3:81792078:81793007	chr3	81792078	81793007	.	930	-1.11037	5.943	0.000261283	0.00646244	83.8387	42.083	71.1838	97.1797	34.2967	51.114	65.9786	38.2832	56.2454	90.1491	45.2505	76.5417	104.494	36.8782	54.9613	70.9447	41.1647	60.4789
chr20:49177933:49178714	chr20	49177933	49178714	.	782	-0.780315	7.25466	0.000263936	0.00648913	176.79	92.311	151.025	199.802	118.379	155.472	165.838	104.661	195.817	226.075	118.045	193.127	255.501	151.38	198.813	212.069	133.838	250.406
chr1:32027928:32029052	chr1	32027928	32029052	.	1125	-1.161	5.68826	0.000308231	0.0073011	78.3709	38.0104	35.5919	80.0761	25.4459	38.3355	81.1358	41.6793	31.7682	69.6631	33.787	31.6373	71.1788	22.6186	34.076	72.1207	37.0482	28.2384
chr19:14616717:14617565	chr19	14616717	14617565	.	849	-1.13516	5.92706	0.000268658	0.00655652	60.1451	27.1503	78.8794	73.8566	39.8284	69.2169	92.7267	35.1958	57.2869	70.8423	31.9792	92.9086	86.9925	46.9122	81.5276	109.219	41.4556	67.4758
chr17:65499218:65499966	chr17	65499218	65499966	.	749	-0.891223	6.76764	0.000269615	0.00656169	103.887	81.4509	94.2705	151.6	68.5934	134.174	154.247	71.9353	107.283	138.701	108.746	125.862	202.404	91.58	179.138	205.938	96.0419	143.235
chr20:49175060:49175570	chr20	49175060	49175570	.	511	-1.46071	5.30555	0.000273831	0.00664748	31.8952	20.3627	50.0211	69.192	13.2761	44.7248	41.9053	18.2154	52.079	62.4171	39.8488	97.8886	135.405	25.9807	87.524	82.0065	35.6466	101.916
chr1:18740360:18741039	chr1	18740360	18741039	.	680	-2.1648	4.34863	0.000275181	0.00665881	30.0726	9.50261	9.61944	29.5426	2.21269	23.4273	33.8809	8.33586	22.9148	44.2244	13.9744	14.1462	43.4451	3.25396	34.4519	49.8248	12.2586	33.6982
chr4:168992194:168993032	chr4	168992194	168993032	.	839	-2.55552	4.40961	2.35941e-05	0.00105107	34.629	13.5752	12.5053	38.0945	2.21269	9.58388	53.4961	6.48344	8.33265	41.2742	16.1802	14.905	45.4046	2.6373	11.423	63.7618	7.72758	9.93164
chr1:231369656:231370423	chr1	231369656	231370423	.	768	-2.84397	4.08655	0.000275065	0.00665881	20.9597	13.5752	8.65749	26.4329	1.10635	11.7136	41.9053	0.926206	15.6237	27.2912	17.676	11.2728	34.4178	1.44055	15.2521	54.5642	1.206	20.3434
chr2:24123255:24124151	chr2	24123255	24124151	.	897	-1.58606	5.0912	0.000274598	0.00665881	61.9677	28.5078	33.668	37.317	9.95711	27.6868	57.9542	15.4368	22.394	69.0833	31.7813	37.534	41.602	11.1005	30.866	64.6089	17.2093	24.9654
chr11:2933205:2934655	chr11	2933205	2934655	.	1451	-1.45666	5.29821	0.000279022	0.00673386	46.4758	25.7928	32.7061	51.3109	22.1269	42.595	82.919	19.1416	19.2692	32.0302	17.7759	22.5404	35.3624	15.2494	29.3556	57.1461	13.192	13.28
chr17:61510211:61511574	chr17	61510211	61511574	.	1364	-2.38721	4.18418	0.000280193	0.00675647	25.5161	5.43006	14.4292	43.5365	8.85076	20.2326	15.1572	3.08735	14.5821	18.7068	3.98098	10.5786	31.9183	6.48883	14.8333	11.1123	2.26346	10.6907
chr10:89604834:89606207	chr10	89604834	89606207	.	1374	-0.863429	6.83763	0.000280763	0.00676457	131.226	88.2385	129.862	115.838	74.1252	113.942	163.163	66.0694	133.843	95.5064	64.2202	94.5141	84.3073	53.9484	82.927	118.751	48.0854	97.4113
chr4:11615904:11616668	chr4	11615904	11616668	.	765	-1.70768	4.95237	0.00029846	0.00710203	51.9435	21.7202	22.1247	66.0822	14.3825	25.557	23.1817	9.87953	30.7266	67.9	28.3925	28.9212	86.382	18.8006	33.4079	30.3028	12.9144	40.1655
chr12:50991170:50992085	chr12	50991170	50992085	.	916	-2.27117	4.23669	0.000306295	0.00727328	21.871	1.35752	16.353	21.7683	5.53173	12.7785	41.0137	8.33586	25.5187	23.8766	1.482	17.8527	23.7645	6.039	13.9503	44.7748	9.10028	27.8589
chr2:46170457:46171766	chr2	46170457	46171766	.	1310	-0.883728	6.70199	0.000306413	0.00727328	152.185	73.3058	72.1458	120.503	66.3807	110.747	155.139	88.6071	84.368	116.172	55.9586	55.0731	91.9869	50.6723	84.5398	118.427	67.639	64.4031
chr4:13908718:13909485	chr4	13908718	13909485	.	768	-1.11186	6.37808	3.95858e-05	0.00153783	110.266	47.513	50.0211	145.381	57.53	73.4764	116.8	64.5257	68.7443	143.576	61.8659	65.1316	189.298	74.9088	95.6724	152.083	84.0178	89.5108
chr9:33767155:33768103	chr9	33767155	33768103	.	949	-1.04758	6.27446	0.000307857	0.0073011	78.3709	36.6529	69.2599	104.954	65.2744	99.0335	123.041	46.3103	60.9325	82.5827	38.6227	72.982	110.594	68.7823	104.356	129.653	48.7991	64.207
chr18:55461936:55462706	chr18	55461936	55462706	.	771	-2.57188	4.00287	0.000310128	0.00733161	30.0726	5.43006	20.2008	23.3231	3.31904	21.2975	11.5908	2.77862	14.0613	39.0046	7.04288	26.2008	30.2505	4.30485	27.6232	15.0335	3.60392	18.2378
chr7:92274927:92275541	chr7	92274927	92275541	.	615	-2.54388	4.20632	0.000310435	0.00733256	18.2258	1.35752	22.1247	19.4359	8.85076	34.076	24.0733	1.54368	23.9564	29.6354	2.20734	35.9751	31.6032	14.3915	55.4082	39.1435	2.51004	38.9534
chr2:239990557:239991932	chr2	239990557	239991932	.	1376	-1.00065	6.4393	0.000230295	0.00587213	134.871	66.5183	72.1458	143.826	38.7221	54.3087	106.101	82.1236	67.7027	98.0167	48.3418	52.4315	104.525	28.1411	39.4685	77.1081	59.6829	49.2026
chr9:123165445:123165943	chr9	123165445	123165943	.	499	-2.00819	4.56251	0.000318329	0.00747621	29.1613	13.5752	21.1628	34.9847	4.42538	33.0112	22.2901	5.2485	35.4137	58.4394	27.2047	42.4103	70.1096	8.8685	66.1546	44.6695	10.518	70.9694
chr6:130174976:130175965	chr6	130174976	130175965	.	990	-1.36721	5.52938	0.00032099	0.00752646	83.8387	23.0778	40.4016	41.2042	12.1698	61.7628	54.3878	30.5648	54.1622	84.6855	23.3109	40.8097	41.6204	12.2927	62.3867	54.9371	30.8735	54.7093
chr11:11472199:11473272	chr11	11472199	11473272	.	1074	-1.69883	4.9634	0.000326521	0.00763133	22.7823	19.0052	31.7441	47.4237	11.0635	42.595	44.5801	8.02712	40.6216	21.2125	17.6957	29.5569	44.1562	10.3012	39.6602	41.5085	7.47404	37.8228
chr9:94096059:94096759	chr9	94096059	94096759	.	701	-2.87436	3.86358	0.000327576	0.0076498	13.6694	1.35752	16.353	14.7713	0	15.9731	24.9649	4.01356	24.9979	19.4998	1.93654	23.3282	21.0718	0	22.7862	35.6132	5.72548	35.6604
chr9:33765026:33766001	chr9	33765026	33766001	.	976	-1.15093	5.99379	0.000330943	0.00770349	60.1451	52.9431	75.9935	96.4023	25.4459	45.7897	99.8595	38.2832	65.0988	61.6241	54.245	77.8622	98.7728	26.0717	46.9156	102.315	39.2246	66.6996
chr1:93372831:93374402	chr1	93372831	93374402	.	1572	-2.68589	3.92158	0.000331972	0.00772124	49.2097	4.07255	14.4292	11.6616	1.10635	10.6488	19.6153	5.86597	7.29106	31.3039	2.59068	9.17885	7.4183	0.703782	6.77402	12.4779	3.73153	4.63808
chr13:20179246:20180413	chr13	20179246	20180413	.	1168	-1.78343	4.70231	0.0003341	0.00776447	49.2097	12.2176	16.353	42.7591	13.2761	34.076	30.3145	10.497	13.5405	42.1316	10.4603	14.0009	36.6088	11.3666	29.1747	25.9542	8.98716	11.5929
chr3:43749357:43750070	chr3	43749357	43750070	.	714	-1.0731	6.35492	8.83798e-05	0.00283759	95.6855	46.1555	60.6024	142.271	47.5729	64.9574	128.391	74.714	61.4533	134.013	64.6436	84.8774	199.259	66.6287	90.9768	179.819	104.641	86.069
chr3:185525237:185525918	chr3	185525237	185525918	.	682	-1.09386	5.93457	0.000336316	0.00780339	67.4355	40.7255	51.9449	102.622	47.5729	57.5033	82.0274	32.4172	55.2038	98.879	59.7148	76.1656	150.472	69.7549	84.3157	120.275	47.5326	80.944
chr14:57463066:57463951	chr14	57463066	57463951	.	886	-2.18262	4.21518	0.000339148	0.00786204	32.8064	9.50261	12.5053	33.4298	8.85076	14.9083	32.0977	4.63103	6.77027	37.0276	10.7253	14.1143	37.7312	9.98958	16.8265	36.2276	5.2269	7.64139
chr4:11498534:11500325	chr4	11498534	11500325	.	1792	-3.01995	5.86355	1.45711e-11	1.13671e-08	113.911	16.2902	58.6786	107.286	18.8079	51.114	98.9679	8.33586	38.0177	63.5666	9.0905	32.7447	59.8697	10.4955	28.5235	55.2276	4.65171	21.2152
chr1:192943931:192944330	chr1	192943931	192944330	.	400	-1.90878	5.31158	5.43611e-06	0.000333138	89.3064	12.2176	23.0866	66.0822	15.4888	38.3355	55.2794	24.6988	19.2692	223.266	30.5441	57.7166	165.206	38.7221	95.8388	138.198	61.7471	48.1731
chr16:4994430:4995968	chr16	4994430	4995968	.	1539	-1.03941	6.17239	0.000339388	0.00786204	70.1693	51.5856	80.8033	103.399	43.1475	68.1521	87.377	35.5046	95.3046	45.5941	33.5189	52.5037	67.186	28.036	44.2833	56.7752	23.0699	61.9263
chr8:74747160:74748065	chr8	74747160	74748065	.	906	-1.26271	6.7435	1.57888e-06	0.000124857	183.169	59.7307	103.89	164.039	54.2109	90.5145	139.09	83.3586	72.3899	202.174	65.9279	114.669	181.059	59.8355	99.9056	153.521	92.0072	79.9005
chr17:70909653:70910622	chr17	70909653	70910622	.	970	-2.47909	4.0854	0.000339834	0.00786605	29.1613	5.43006	18.2769	25.6555	4.42538	4.2595	21.3985	4.01356	25.5187	30.0632	5.598	18.8422	26.4489	4.56225	4.39124	22.0603	4.13769	26.308
chr20:49377897:49379694	chr20	49377897	49379694	.	1798	-0.703074	7.71847	0.00034077	0.00787729	287.968	181.907	209.704	288.429	149.357	197.002	240.733	170.731	156.758	160.16	101.172	116.632	160.417	83.0682	109.567	133.889	94.9559	87.1846
chr7:19997278:19998315	chr7	19997278	19998315	.	1038	-1.05956	6.02953	0.000343209	0.00791245	69.258	33.9379	50.0211	104.177	48.6792	64.9574	102.534	47.854	52.5998	66.7226	32.6955	48.1898	100.363	46.8971	62.5794	98.7806	46.1021	50.6742
chr12:89319424:89320539	chr12	89319424	89320539	.	1116	-0.888676	6.6729	0.000344376	0.00793301	97.508	71.9483	122.167	151.6	63.0617	87.3198	129.282	69.4655	111.97	87.3728	64.4698	109.468	135.843	56.5069	78.2436	115.844	62.245	100.331
chr2:152650794:152652091	chr2	152650794	152652091	.	1298	-1.41412	6.12955	3.34042e-06	0.000227938	93.8629	33.9379	49.0591	115.061	34.2967	51.114	123.041	51.8675	63.0156	72.3135	26.1463	37.7959	88.6447	26.4227	39.3791	94.7929	39.9596	48.5483
chr5:115367469:115368274	chr5	115367469	115368274	.	806	-0.966753	6.38109	0.000344725	0.00793471	126.669	36.6529	75.0316	122.058	61.9554	79.8657	95.4015	71.9353	66.1404	157.158	45.4751	93.0913	151.436	76.8677	99.0889	118.364	89.2498	82.06
chr17:40775899:40776613	chr17	40775899	40776613	.	715	-1.53002	5.0407	0.000345857	0.00795442	60.1451	16.2902	38.4777	36.5396	17.7015	35.1409	41.0137	14.2018	24.4771	84.1191	22.7835	53.815	51.1043	24.7574	49.1481	57.3618	19.8627	34.2338
chr15:52166523:52168148	chr15	52166523	52168148	.	1626	-0.788479	7.13208	0.000347425	0.00798414	176.79	97.7411	171.226	152.378	89.614	145.888	189.02	109.91	116.657	108.727	60.1114	105.305	93.7133	55.1132	89.722	116.248	67.5952	71.7448
chr3:152046566:152047365	chr3	152046566	152047365	.	800	-1.45063	5.24209	0.00035004	0.00802506	49.2097	25.7928	29.8202	48.2012	18.8079	47.9194	50.8213	12.6582	44.788	61.5121	32.241	37.2753	60.2514	23.5098	59.8993	63.5267	15.8227	55.985
chr5:68502210:68503072	chr5	68502210	68503072	.	863	-1.10266	6.15569	0.000120296	0.00355761	121.202	58.3732	63.4883	101.844	53.1046	47.9194	95.4015	40.1356	47.9127	140.442	67.6398	73.5669	118.012	61.5349	55.5266	110.546	46.5071	55.5188
chr1:94750512:94751813	chr1	94750512	94751813	.	1302	-1.15153	5.74637	0.000354973	0.00811881	61.9677	28.5078	61.5644	87.8505	37.6157	48.9843	64.1954	30.5648	48.4335	47.5943	21.8954	47.2845	67.4735	28.8907	37.6223	49.3052	23.4753	37.1993
chr2:54997970:54998873	chr2	54997970	54998873	.	904	-1.70556	4.86047	0.000356382	0.00812955	39.1855	13.5752	21.1628	45.8688	9.95711	13.8434	41.9053	14.5106	45.8296	43.3468	15.0168	23.4101	50.7399	11.0145	15.3135	46.3554	16.0515	50.6964
chr22:39139830:39140542	chr22	39139830	39140542	.	713	-1.90204	4.516	0.000356143	0.00812955	42.8306	6.78758	30.7822	28.7652	5.53173	21.2975	23.1817	11.1145	21.8732	60.071	9.51974	43.1728	40.3439	7.75838	29.8703	32.5129	15.5883	30.6777
chr7:129471094:129471870	chr7	129471094	129471870	.	777	-1.02971	6.17464	0.000356569	0.00812955	78.3709	39.3679	54.8308	94.07	58.6363	83.0603	119.475	45.0754	64.0572	100.864	50.6666	70.5673	121.068	75.465	106.899	153.764	58.0121	82.4417
chr8:8209690:8210453	chr8	8209690	8210453	.	764	-1.43474	5.13512	0.000355734	0.00812955	60.1451	17.6477	25.0105	40.4268	22.1269	28.7516	56.171	18.2154	34.3722	78.724	23.0991	32.7363	52.9146	28.9619	37.633	73.5222	23.8421	44.9897
chr6:152457090:152457835	chr6	152457090	152457835	.	746	-1.78392	4.73833	0.000357624	0.00814718	22.7823	9.50261	37.5158	24.1006	9.95711	37.2707	41.9053	7.10091	36.9761	30.5392	12.7381	50.2893	32.3064	13.3473	49.9607	56.1733	9.51865	49.5658
chr6:139138719:139139596	chr6	139138719	139139596	.	878	-1.42243	5.41139	0.000358059	0.00815065	90.2177	12.2176	45.2113	63.7499	23.2333	18.1029	47.2549	34.5784	33.3306	102.754	13.9153	51.4936	72.6081	26.4616	20.6183	53.8211	39.3831	37.9619
chr5:115264150:115265339	chr5	115264150	115265339	.	1190	-0.760382	7.51246	0.000368869	0.00836374	175.879	158.829	160.645	251.112	123.911	217.235	260.348	125.964	156.758	147.797	133.47	134.995	211.019	104.127	182.55	218.78	105.852	131.729
chr1:16121242:16122382	chr1	16121242	16122382	.	1141	-0.826143	7.50782	0.000386303	0.00869076	152.185	152.042	216.437	204.466	100.677	188.483	320.977	129.978	159.883	133.379	133.253	189.691	179.199	88.2362	165.191	281.312	113.916	140.125
chr12:69453033:69453776	chr12	69453033	69453776	.	744	-1.44695	5.18669	0.000388282	0.00872169	57.4113	10.8601	21.1628	52.8658	23.2333	43.6599	49.0381	22.2289	33.3306	77.1657	14.5969	28.4446	71.0562	31.2275	58.6827	65.9115	29.8776	44.7992
chr14:54315489:54316426	chr14	54315489	54316426	.	938	-2.25551	4.17266	0.000388015	0.00872169	48.2984	6.78758	8.65749	24.1006	9.95711	13.8434	21.3985	4.01356	13.0198	51.4908	7.23622	9.22974	25.6936	10.6153	14.7584	22.8129	4.27885	13.8803
chr7:73613935:73614810	chr7	73613935	73614810	.	876	-0.82071	7.00337	0.000392318	0.00879864	167.677	103.171	142.368	129.832	90.7203	97.9686	205.069	91.3857	113.532	191.413	117.775	162.52	148.21	103.562	111.836	234.097	104.322	129.603
chr20:50247347:50248564	chr20	50247347	50248564	.	1218	-1.16703	5.72232	0.000394922	0.00883646	92.9516	33.9379	41.3636	55.9755	27.6586	47.9194	66.8702	33.6522	60.9325	76.3149	27.8636	33.9602	45.9569	22.7082	39.3427	54.9016	27.629	50.0267
chr2:162947647:162948730	chr2	162947647	162948730	.	1084	-2.28482	4.38825	8.60964e-05	0.00279223	37.3629	2.71503	10.5814	38.8719	4.42538	12.7785	46.3633	14.2018	6.77027	34.4676	2.50464	9.76142	35.8597	4.08246	11.7883	42.7706	13.1013	6.24564
chr17:1690574:1691495	chr17	1690574	1691495	.	922	-1.30595	5.46041	0.000401952	0.00895902	51.0322	19.0052	58.6786	59.8627	15.4888	60.6979	52.6045	28.4037	36.9761	55.3495	20.613	63.6427	64.927	16.7992	65.8329	57.0548	30.8066	40.1042
chr8:126162799:126164795	chr8	126162799	126164795	.	1997	-1.30394	5.71757	0.000403359	0.00898345	87.4838	44.798	47.1352	52.8658	36.5094	38.3355	81.1358	15.128	58.3285	43.8076	22.4327	23.603	26.4726	18.2821	19.1966	40.6289	7.57538	29.2081
chr13:34639981:34640925	chr13	34639981	34640925	.	945	-1.41775	5.21437	0.000405686	0.00902135	42.8306	14.9327	31.7441	47.4237	17.7015	33.0112	80.2442	27.7862	24.4771	45.3234	15.8018	33.5917	50.1838	18.7318	34.9324	84.9145	29.4034	25.9017
chr22:24729075:24729757	chr22	24729075	24729757	.	683	-1.56646	5.03692	0.000407616	0.0090573	48.2984	14.9327	27.8964	38.0945	25.4459	38.3355	55.2794	9.87953	25.5187	70.715	21.8634	40.8439	55.7752	37.2561	56.1282	80.9361	14.4649	37.3627
chr14:53647993:53649336	chr14	53647993	53649336	.	1344	-1.59073	5.01322	0.000418929	0.00925878	44.6532	23.0778	32.7061	52.0883	12.1698	41.5302	44.5801	13.2756	15.1029	33.2241	17.171	24.3349	38.7562	9.05491	30.9004	33.1697	9.8777	11.2373
chr16:22037658:22038209	chr16	22037658	22038209	.	552	-0.744257	7.48234	0.000418748	0.00925878	166.766	86.881	194.313	203.689	121.698	255.57	205.069	130.286	230.71	302.112	157.393	352.016	369.001	220.467	462.99	371.501	236.026	417.953
chr7:39772912:39774267	chr7	39772912	39774267	.	1356	-1.47821	5.46426	0.000418275	0.00925878	81.1048	21.7202	57.7166	71.5243	35.4031	38.3355	49.0381	17.5979	13.5405	59.8118	16.0179	42.5639	52.7465	26.1085	28.271	36.1638	12.9778	9.98566
chr1:94724257:94725040	chr1	94724257	94725040	.	784	-1.14202	5.7663	0.000419497	0.00926424	58.3226	27.1503	80.8033	49.756	22.1269	70.2818	57.9542	25.625	83.8472	74.391	34.6305	103.065	63.4643	28.2231	89.6452	73.9211	32.685	106.948
chr1:231531079:231532036	chr1	231531079	231532036	.	958	-0.776746	7.33297	0.000420127	0.00927002	208.685	122.176	179.883	209.131	122.804	185.288	139.09	85.8284	185.401	217.834	127.533	187.77	218.299	128.188	193.412	145.188	89.5913	193.53
chr9:21836304:21836991	chr9	21836304	21836991	.	688	-0.986904	6.37802	0.000421049	0.00927015	65.6129	44.798	85.613	136.052	64.168	93.7091	115.908	51.5588	77.5978	95.3676	65.1134	124.437	197.749	93.2675	136.205	168.471	74.9401	112.787
chr12:15835908:15836373	chr12	15835908	15836373	.	466	-2.48942	3.8961	0.000422765	0.00930083	45.5645	4.07255	9.61944	18.6585	3.31904	5.32438	20.5069	6.48344	7.29106	97.7779	8.73937	20.6426	40.0397	7.1224	11.4257	44.0061	13.913	15.6461
chr7:155098583:155099661	chr7	155098583	155099661	.	1079	-2.08833	4.61556	0.000107094	0.00327109	64.7016	2.71503	9.61944	29.5426	14.3825	18.1029	44.5801	13.2756	10.4158	59.9644	2.51625	8.91514	27.3796	13.3295	16.7775	41.3161	12.3036	9.6532
chr11:107433423:107434971	chr11	107433423	107434971	.	1549	-0.711813	7.84712	0.000437942	0.00957634	284.322	147.969	257.801	258.109	205.78	169.315	353.075	190.181	192.172	183.552	95.5256	166.431	166.63	132.847	109.306	227.937	122.777	124.062
chr3:146220823:146221955	chr3	146220823	146221955	.	1133	-1.19353	6.88952	1.25255e-06	0.000106334	177.702	81.4509	100.042	141.494	73.0188	95.8388	205.069	75.0227	104.158	156.842	71.8896	88.2984	124.884	64.4473	84.5886	180.996	66.216	91.9312
chr17:73679442:73681113	chr17	73679442	73681113	.	1672	-0.722973	7.35177	0.00045006	0.00975998	217.798	107.244	169.302	187.363	110.635	166.121	200.611	143.871	153.112	130.262	64.141	101.257	112.059	66.169	99.3545	119.982	86.0471	91.5744
chr8:17695404:17697246	chr8	17695404	17697246	.	1843	-0.952475	6.63476	0.0004498	0.00975998	126.669	93.6686	122.167	152.378	39.8284	72.4116	118.583	72.5528	82.8057	68.73	50.824	66.2869	82.6792	21.6107	39.29	64.3424	39.3667	44.9298
chr8:8863595:8865017	chr8	8863595	8865017	.	1423	-1.12984	5.70897	0.000451423	0.00976752	66.5242	28.5078	49.0591	73.0792	24.3396	47.9194	71.3282	40.1356	55.2038	46.7492	20.0336	34.4758	51.3557	17.1044	33.6749	50.1252	28.2049	38.7939
chr1:23609398:23609809	chr1	23609398	23609809	.	412	-3.39725	3.52225	0.000453626	0.00980785	24.6048	0	14.4292	9.32925	1.10635	12.7785	13.374	2.16115	12.499	59.7205	0	35.0222	22.6438	2.6853	31.0158	32.4613	5.2455	30.3373
chr19:2154584:2155411	chr19	2154584	2155411	.	828	-1.775	4.81369	0.000458476	0.00990528	40.0968	29.8653	20.2008	45.8688	4.42538	20.2326	53.4961	9.5708	17.7069	48.426	36.0692	24.3971	55.3971	5.34466	24.4356	64.6089	11.5589	21.3851
chr7:101572878:101573830	chr7	101572878	101573830	.	953	-1.3275	6.00854	2.58808e-05	0.00112334	102.976	54.3006	37.5158	97.9572	40.9348	47.9194	98.9679	29.0211	57.2869	108.054	56.9786	39.366	102.788	42.9536	50.2827	103.849	30.4524	60.1122
chr2:182655347:182656407	chr2	182655347	182656407	.	1061	-0.661637	8.05363	0.000462993	0.00999196	279.766	228.063	251.067	366.173	164.845	271.543	342.375	230.008	243.73	263.681	214.951	236.633	345.121	155.368	255.932	322.691	216.784	229.717
chr12:50926116:50927378	chr12	50926116	50927378	.	1263	-0.817618	6.80644	0.000464336	0.00999446	123.024	81.4509	115.433	151.6	66.3807	119.266	149.789	90.4595	96.3462	97.4063	64.49	91.3961	120.032	52.558	94.4308	118.598	71.6227	76.2836
chr2:112045374:112046328	chr2	112045374	112046328	.	955	-1.51258	5.78971	1.5466e-05	0.000760493	64.7016	16.2902	33.668	100.289	29.8713	42.595	107.884	43.5317	43.7464	67.7504	17.0578	35.2545	105.015	31.2789	44.6021	112.967	45.5829	45.8077
chr9:5621494:5622369	chr9	5621494	5622369	.	876	-1.09091	6.4279	2.96749e-05	0.00125041	136.694	62.4457	66.3741	122.835	49.7856	77.7359	119.475	64.217	61.9741	156.043	71.2851	75.7695	140.223	56.8328	88.7397	136.387	73.307	70.7466
chr5:33049596:33050543	chr5	33049596	33050543	.	948	-1.40452	5.30097	0.000360639	0.00819645	53.7661	12.2176	22.1247	55.9755	36.5094	25.557	84.7022	23.7726	26.5603	56.7153	12.8878	23.3383	59.0459	38.512	26.9589	89.3483	25.0766	28.0172
chr21:38281785:38282596	chr21	38281785	38282596	.	812	-1.45413	5.90365	1.55579e-05	0.000763712	102.064	20.3627	51.9449	85.5182	54.2109	39.4004	99.8595	30.5648	41.6632	125.695	25.0773	63.9716	105.318	66.7622	48.5227	122.98	37.6414	51.3094
chr21:38216999:38217958	chr21	38216999	38217958	.	960	-4.34958	3.41706	9.44295e-05	0.00296585	15.4919	0	1.92389	32.6524	0	0	26.7481	2.16115	3.12474	16.1374	0	2.00405	34.0129	0	0	27.8626	2.2512	3.25494
chr12:93483866:93485294	chr12	93483866	93485294	.	1429	-0.95952	6.78493	9.02371e-05	0.0028856	159.476	55.6581	83.6891	155.488	80.7632	103.293	159.597	100.956	79.1601	111.6	38.949	58.5648	108.809	56.5173	72.2834	111.684	70.6483	55.3955
chr7:148841677:148842591	chr7	148841677	148842591	.	915	-1.9282	5.09688	1.13046e-05	0.000593266	65.6129	19.0052	32.7061	53.6432	14.3825	14.9083	60.629	14.5106	19.79	71.7081	20.7707	35.7443	58.6265	15.7186	16.2932	66.2612	15.8585	21.6285
chr22:37394785:37395922	chr22	37394785	37395922	.	1138	-1.3042	5.64926	0.000156791	0.00435155	87.4838	29.8653	35.5919	89.4054	22.1269	44.7248	61.5206	41.0618	26.0395	76.8751	26.2437	31.2758	78.5636	19.4437	39.3012	54.0603	36.0824	22.8818
chr21:16388406:16388736	chr21	16388406	16388736	.	331	-5.2464	3.31326	0.000133247	0.00386568	23.6935	2.71503	1.92389	16.3262	0	2.12975	31.2061	0	0	71.5817	8.20251	5.81235	49.3239	0	6.4343	94.2782	0	0
chr1:233790365:233791366	chr1	233790365	233791366	.	1002	-1.71298	5.53883	1.72103e-05	0.000827931	85.6613	12.2176	50.983	87.8505	32.084	27.6868	63.3038	25.9338	19.2692	85.4903	12.1933	50.8812	87.6751	32.02	27.6315	63.1774	25.882	19.2308
chr21:17078872:17079519	chr21	17078872	17079519	.	648	-1.796	4.84338	8.74556e-05	0.00281732	51.9435	10.8601	10.5814	48.9786	14.3825	21.2975	49.9297	16.6717	19.79	80.1598	16.7594	16.3293	75.5842	22.1952	32.8665	77.0521	25.728	30.5402
chr17:73641470:73642728	chr17	73641470	73642728	.	1259	-6.99207	5.55578	1.87097e-15	1.08008e-11	92.9516	4.07255	40.4016	93.2925	0	41.5302	100.751	0	36.9761	73.8297	3.23475	32.0903	74.1005	0	32.9866	80.0247	0	29.3694
chr11:65886884:65887571	chr11	65886884	65887571	.	688	-3.49291	4.95265	8.10443e-09	1.8865e-06	67.4355	0	24.0486	74.634	8.85076	15.9731	45.4717	6.17471	21.8732	98.0167	0	34.9543	108.48	12.8645	23.2168	66.0926	8.97487	31.7924
chr11:86522616:86523319	chr11	86522616	86523319	.	704	-1.8871	5.96363	8.35609e-08	1.23025e-05	98.4193	20.3627	68.298	121.28	34.2967	37.2707	92.7267	28.7124	46.3503	139.8	28.9243	97.0142	172.273	48.7169	52.9413	131.714	40.7846	65.8386
chr2:210504788:210505535	chr2	210504788	210505535	.	748	-2.35935	4.52191	9.07867e-05	0.00289397	27.3387	6.78758	18.2769	38.0945	16.5952	11.7136	66.8702	4.3223	5.2079	36.5491	9.0743	24.4344	50.9284	22.1861	15.6599	89.3986	5.77847	6.96244
chr1:153704564:153705418	chr1	153704564	153705418	.	855	-3.21411	4.74428	1.97601e-07	2.39646e-05	68.3468	9.50261	18.2769	43.5365	0	14.9083	50.8213	7.10091	15.6237	79.9377	11.1142	21.3765	50.9199	0	17.4366	59.4402	8.30516	18.2733
chr16:4544932:4547028	chr16	4544932	4547028	.	2097	-0.732733	7.6346	0.000230108	0.00587213	256.984	142.539	151.987	230.122	175.909	169.315	310.278	160.234	177.59	122.548	67.9729	72.4783	109.738	83.886	80.7417	147.963	76.4109	84.6874
chr6:150155862:150156765	chr6	150155862	150156765	.	904	-0.895985	6.49108	0.000269603	0.00656169	110.266	65.1607	69.2599	135.274	68.5934	76.6711	133.74	69.4655	67.7027	121.976	72.0805	76.615	149.64	75.8777	84.8131	147.943	76.8423	74.8924
chr15:57221475:57222269	chr15	57221475	57222269	.	795	-2.80912	4.49908	3.61172e-06	0.000241876	64.7016	2.71503	15.3911	39.6493	6.63807	17.038	30.3145	8.02712	6.24948	81.3857	3.41513	19.3599	49.8734	8.34978	21.4315	38.1314	10.097	7.86099
chr12:76256326:76257778	chr12	76256326	76257778	.	1453	-0.754252	7.66134	0.000323398	0.00757061	279.766	213.13	174.112	293.094	120.592	139.499	246.082	154.985	187.485	192.544	146.683	119.829	201.717	82.995	96.0074	169.362	106.666	129.033
chr10:23105255:23106750	chr10	23105255	23106750	.	1496	-0.769308	7.25669	0.000312945	0.00738165	228.734	119.461	123.129	158.597	123.911	139.499	233.6	120.407	116.136	152.897	79.8538	82.3053	106.014	82.828	93.2478	156.15	80.4858	77.6312
chr17:27991843:27992829	chr17	27991843	27992829	.	987	-1.7491	5.93481	1.23998e-06	0.000105577	104.798	32.5804	52.9069	109.619	11.0635	51.114	91.8351	42.2968	40.1009	106.179	33.0095	53.6037	111.063	11.2092	51.7873	93.0446	42.8539	40.629
chr8:143780975:143781674	chr8	143780975	143781674	.	700	-2.05054	6.40402	2.23642e-10	9.49293e-08	117.556	25.7928	78.8794	150.823	30.9777	73.4764	149.789	40.1356	80.2017	167.938	36.8468	112.685	215.461	44.2538	104.966	213.985	57.3366	114.574
chr6:49520330:49521711	chr6	49520330	49521711	.	1382	-1.42523	5.54506	6.3632e-05	0.00220489	79.2822	36.6529	31.7441	66.0822	17.7015	38.3355	77.5694	28.7124	31.2474	57.3678	26.5216	22.9697	47.8164	12.8086	27.7392	56.1284	20.776	22.6103
chr3:118407109:118407897	chr3	118407109	118407897	.	789	-1.71397	5.21747	0.000105475	0.00322846	96.5967	23.0778	17.315	32.6524	8.85076	30.8814	64.1954	24.6988	23.4356	122.429	29.2494	21.9455	41.3845	11.2177	39.1399	81.363	31.304	29.7029
chr8:8872505:8873156	chr8	8872505	8873156	.	652	-1.71483	5.22186	3.31195e-05	0.0013579	82.0161	17.6477	33.668	41.2042	19.9142	21.2975	65.9786	19.4503	21.8732	125.792	27.067	51.6381	63.1966	30.5433	32.6649	101.194	29.8318	33.5478
chr5:142200812:142202458	chr5	142200812	142202458	.	1647	-0.907618	7.9504	4.45829e-05	0.00168349	330.798	225.348	244.334	272.103	115.06	185.288	430.644	208.088	201.025	200.849	136.823	148.351	165.211	69.8603	112.501	261.472	126.343	122.055
chr9:99437054:99437899	chr9	99437054	99437899	.	846	-1.59103	7.08627	8.78312e-09	1.99619e-06	239.669	46.1555	109.662	185.03	82.9759	97.9686	209.527	77.1839	159.883	283.297	54.5574	129.624	218.712	98.0803	115.802	247.667	91.2339	188.987
chr6:162479191:162479701	chr6	162479191	162479701	.	511	-1.88492	4.43694	0.000418687	0.00925878	33.7177	14.9327	10.5814	32.6524	9.95711	12.7785	49.0381	7.71839	11.4574	65.9838	29.2224	20.7072	63.899	19.4855	25.0069	95.965	15.1045	22.4215
chr17:74090648:74091417	chr17	74090648	74091417	.	770	-2.02986	5.30525	1.61556e-06	0.000127237	65.6129	12.2176	31.7441	87.8505	11.0635	30.8814	53.4961	23.4639	24.9979	85.2115	15.8671	41.2262	114.092	14.3681	40.1057	69.4755	30.4726	32.4649
chr18:67946797:67948616	chr18	67946797	67948616	.	1820	-0.874279	7.17554	0.000137873	0.00397163	164.944	93.6686	92.3466	210.686	137.187	122.461	224.684	98.1779	143.217	90.6283	51.4662	50.7399	115.761	75.3774	67.2861	123.453	53.9439	78.6909
chr8:96079043:96079877	chr8	96079043	96079877	.	835	-2.1658	4.69374	2.91982e-05	0.00123574	47.3871	13.5752	22.1247	50.5335	13.2761	10.6488	41.9053	6.48344	14.5821	56.751	16.2577	26.4966	60.5191	15.8996	12.753	50.186	7.7646	17.4636
chr5:92572235:92573006	chr5	92572235	92573006	.	772	-1.96733	4.96654	2.73066e-05	0.00117639	41.9193	17.6477	11.5433	58.3078	7.74442	28.7516	65.087	16.0542	20.8316	54.2997	22.8597	14.9525	75.5283	10.0316	37.2431	84.3096	20.7956	26.984
chr15:79007580:79008683	chr15	79007580	79008683	.	1104	-1.27282	5.54961	0.000179915	0.00486699	72.9032	28.5078	27.8964	70.7468	25.4459	35.1409	74.003	34.2696	38.5385	66.0355	25.8223	25.2684	64.0823	23.0489	31.8305	67.0317	31.0413	34.908
chr4:11700482:11701186	chr4	11700482	11701186	.	705	-1.27693	6.6343	4.09929e-06	0.000266491	113	51.5856	98.1182	145.381	58.6363	57.5033	189.911	71.0091	94.2631	160.284	73.171	139.175	206.214	83.1721	81.565	269.378	100.722	133.706
chr13:30404945:30405674	chr13	30404945	30405674	.	730	-2.28754	4.84803	9.56205e-06	0.00052685	51.0322	1.35752	19.2389	56.753	15.4888	21.2975	51.7129	13.2756	15.1029	69.9072	1.85961	26.3546	77.7438	21.2176	29.1747	70.8396	18.1858	20.6889
chrX:45683797:45684866	chrX	45683797	45684866	.	1070	-1.06949	6.98449	1.61059e-05	0.000787933	210.508	97.7411	76.9555	174.924	65.2744	111.812	161.38	95.708	131.239	196.736	91.3468	71.921	163.48	61.0041	104.497	150.822	89.4467	122.653
chr2:239289393:239289865	chr2	239289393	239289865	.	473	-2.20654	4.19086	0.000308344	0.0073011	48.2984	4.07255	9.61944	22.5457	4.42538	6.38926	32.9893	11.4232	10.4158	102.111	8.61003	20.3371	47.6653	9.35599	13.5079	69.7448	24.1505	22.0207
chr8:27930714:27931633	chr8	27930714	27931633	.	920	-2.51351	4.15568	0.000104484	0.00320491	30.0726	8.14509	4.80972	27.9878	2.21269	12.7785	45.4717	7.10091	8.85344	32.6876	8.85336	5.22795	30.4215	2.4051	13.8897	49.4258	7.71839	9.6233
chrX:122937215:122937896	chrX	122937215	122937896	.	682	-1.72636	5.14752	0.000179137	0.00485048	52.8548	2.71503	23.0866	41.9816	23.2333	24.4921	90.0518	25.3163	20.8316	77.4997	3.98098	33.8514	61.5567	34.0664	35.9122	132.041	37.1207	30.5449
chr17:16176751:16177820	chr17	16176751	16177820	.	1070	-2.20525	5.41941	5.81894e-07	5.91401e-05	54.6774	19.0052	31.7441	87.8505	4.42538	34.076	84.7022	22.5377	31.7682	51.1004	17.7619	29.6674	82.1033	4.13587	31.8468	79.161	21.0633	29.6899
chr17:45196988:45198365	chr17	45196988	45198365	.	1378	-1.39085	6.29087	1.42138e-05	0.000708579	45.5645	29.8653	142.368	95.6249	19.9142	145.888	73.1114	30.5648	108.324	33.0657	21.673	103.315	69.3939	14.4515	105.869	53.0562	22.1806	78.6099
chr8:96087679:96088854	chr8	96087679	96088854	.	1176	-2.07037	4.94718	1.22917e-05	0.000631855	52.8548	12.2176	19.2389	56.753	19.9142	26.6219	51.7129	8.33586	17.7069	44.9446	10.3891	16.3596	48.2593	16.9339	22.6377	43.9736	7.08831	15.0569
chr4:11535956:11536917	chr4	11535956	11536917	.	962	-3.23598	3.62021	0.000242982	0.00610619	19.1371	4.07255	0.961944	24.878	2.21269	6.38926	32.9893	2.16115	5.2079	19.893	4.23342	0.999941	25.8607	2.30009	6.64164	34.2924	2.24652	5.41362
chr9:97780300:97781374	chr9	97780300	97781374	.	1075	-3.71126	6.43894	1.54313e-15	1.08008e-11	166.766	13.5752	100.042	140.716	3.31904	94.774	164.055	15.4368	68.7443	155.131	12.628	93.0624	130.899	3.08748	88.1618	152.609	14.3598	63.9482
chr4:30921493:30922529	chr4	30921493	30922529	.	1037	-2.48223	4.73823	2.29212e-06	0.000167918	53.7661	12.2176	18.2769	41.9816	8.85076	13.8434	49.9297	6.48344	21.8732	51.8477	11.7817	17.6248	40.4837	8.53497	13.3495	48.1483	6.25212	21.0928
chr2:208480586:208482703	chr2	208480586	208482703	.	2118	-0.968404	6.7758	8.02799e-05	0.00263302	176.79	95.0261	80.8033	136.829	60.849	86.2549	148.006	80.2712	107.804	83.4704	44.8659	38.1507	64.603	28.7295	40.7247	69.8801	37.8995	50.8988
chr9:128300178:128301028	chr9	128300178	128301028	.	851	-2.36919	4.98255	2.43826e-06	0.000175506	70.1693	19.0052	20.2008	62.9725	4.42538	25.557	37.4473	10.497	21.3524	82.4552	22.3328	23.7377	73.9982	5.20021	30.0318	44.0039	12.3349	25.091
chr2:178109594:178110339	chr2	178109594	178110339	.	746	-1.38981	5.69966	4.87457e-05	0.00180449	76.5484	32.5804	53.8688	101.844	27.6586	35.1409	62.4122	31.491	32.8098	102.612	43.6734	72.2102	136.521	37.0759	47.1058	83.6624	42.2132	43.981
chr8:103918257:103919176	chr8	103918257	103919176	.	920	-1.22751	5.65818	0.000401654	0.00895902	92.9516	31.2229	37.5158	81.631	27.6586	53.2438	56.171	37.6657	23.4356	101.034	33.9379	40.778	88.7293	30.0637	57.8737	61.0554	40.941	25.4734
chr19:53168120:53169295	chr19	53168120	53169295	.	1176	-3.442	4.9781	1.8235e-08	3.78658e-06	62.879	0	18.2769	49.756	12.1698	24.4921	71.3282	4.63103	26.5603	53.4685	0	15.5416	42.3095	10.3485	20.8267	60.6532	3.93795	22.5853
chr10:120949506:120950435	chr10	120949506	120950435	.	930	-1.85107	5.27596	9.64003e-06	0.000528992	74.7258	28.5078	33.668	62.9725	13.2761	26.6219	55.2794	14.2018	27.0811	80.3503	30.6536	36.2022	67.7123	14.2754	28.6257	59.4402	15.2708	29.1195
chr1:78385327:78386196	chr1	78385327	78386196	.	870	-1.65123	4.85559	0.000395774	0.00884292	30.9839	8.14509	23.0866	41.9816	15.4888	19.1678	73.1114	20.0678	14.5821	35.6136	9.36217	26.5364	48.2548	17.8033	22.0319	84.0361	23.0664	16.7611
chr1:214680189:214680838	chr1	214680189	214680838	.	650	-2.52053	4.62609	1.07581e-05	0.000570814	54.6774	12.2176	22.1247	38.0945	3.31904	20.2326	44.5801	8.33586	6.77027	84.1191	18.7964	34.038	58.6069	5.10621	31.1271	68.5848	12.8244	10.4158
chr13:113376708:113377583	chr13	113376708	113377583	.	876	-0.993541	6.65962	0.000100121	0.00311074	107.532	90.9535	87.5369	150.046	61.9554	74.5413	167.621	63.9082	92.7007	122.754	103.828	99.9279	171.285	70.7253	85.0928	191.348	72.9546	105.823
chr9:21615774:21616884	chr9	21615774	21616884	.	1111	-1.30274	6.3013	4.40137e-06	0.000282314	113	42.083	61.5644	122.058	57.53	79.8657	114.125	42.9142	63.5364	101.71	37.8785	55.4135	109.863	51.7822	71.8863	102.723	38.6267	57.1885
chr13:52288848:52289671	chr13	52288848	52289671	.	824	-2.09248	5.14509	5.72198e-06	0.000346973	66.5242	20.3627	25.9725	46.6463	15.4888	37.2707	68.6534	9.5708	16.6653	80.7332	24.7121	31.52	56.6096	18.7971	45.2314	83.3172	11.615	20.2249
chr6:45012560:45013447	chr6	45012560	45013447	.	888	-1.85129	5.38152	1.419e-05	0.000708579	104.798	32.5804	30.7822	50.5335	15.4888	29.8165	52.6045	13.2756	33.3306	118.016	36.6896	34.6646	56.9071	17.4424	33.5772	59.2394	14.95	37.5344
chr3:12386425:12387229	chr3	12386425	12387229	.	805	-1.02427	6.41213	9.70329e-05	0.00303112	135.782	47.513	76.9555	105.732	56.4236	61.7628	121.258	70.0829	76.5562	168.674	59.0224	95.5969	131.344	70.0915	76.724	150.631	87.0595	95.1008
chr15:52544884:52545529	chr15	52544884	52545529	.	646	-1.06748	6.28213	0.000124183	0.00365385	94.7742	44.798	58.6786	115.838	45.3602	80.9306	124.824	65.4519	55.7246	146.709	69.3468	90.8337	179.316	70.217	125.28	193.227	101.319	86.2609
chr12:13052171:13053046	chr12	13052171	13053046	.	876	-1.03174	6.11329	0.000441997	0.0096358	95.6855	32.5804	51.9449	87.073	55.3173	42.595	117.692	55.5724	69.7859	109.23	37.1922	59.2979	99.3985	63.1476	48.6245	134.351	63.4388	79.6643
chr1:66811999:66812616	chr1	66811999	66812616	.	618	-1.90864	4.65883	0.000108339	0.00329516	51.0322	13.5752	14.4292	34.9847	9.95711	13.8434	43.6885	11.1145	21.3524	82.5764	21.9663	23.3481	56.6096	16.1118	22.4003	70.6934	17.9846	34.5508
chr1:25034167:25034582	chr1	25034167	25034582	.	416	-2.19101	4.66312	1.7418e-05	0.000832371	51.9435	6.78758	13.4672	43.5365	11.0635	22.3624	38.3389	10.497	16.6653	124.864	16.3163	32.3731	104.655	26.5948	53.7558	92.1608	25.2332	40.0608
chr1:108479048:108479882	chr1	108479048	108479882	.	835	-2.19039	4.60692	3.54509e-05	0.00142515	40.0968	5.43006	23.0866	56.753	9.95711	14.9083	32.9893	11.4232	10.9366	48.0201	6.50307	27.6487	67.9676	11.9247	17.8542	39.5081	13.6805	13.0977
chr3:28001311:28002114	chr3	28001311	28002114	.	804	-1.84404	4.72988	0.000117201	0.00349938	37.3629	14.9327	24.0486	52.0883	11.0635	14.9083	44.5801	11.7319	15.1029	46.4713	18.573	29.9112	64.7865	13.7605	18.5426	55.4479	14.592	18.7847

## Sheet: Hct116 Jun increased Fbw7-Arg
Geneid	Chr	Start	End	Strand	Length	R_vs_WT.logFC	R_vs_WT.logCPM	R_vs_WT.PValue	R_vs_WT.FDR	CPM.TMMnormalized.Sample_DJ_HsSc_10WJ_1019	CPM.TMMnormalized.Sample_DJ_HsSc_11NJ_1019	CPM.TMMnormalized.Sample_DJ_HsSc_12RJ_1019	CPM.TMMnormalized.Sample_DJ_HsSc_13WJ_1019	CPM.TMMnormalized.Sample_DJ_HsSc_14NJ_1019	CPM.TMMnormalized.Sample_DJ_HsSc_15RJ_1019	CPM.TMMnormalized.Sample_DJ_HsSc_16WJ_1019	CPM.TMMnormalized.Sample_DJ_HsSc_17NJ_1019	CPM.TMMnormalized.Sample_DJ_HsSc_18RJ_1019	FPKM.TMMnormalized.Sample_DJ_HsSc_10WJ_1019	FPKM.TMMnormalized.Sample_DJ_HsSc_11NJ_1019	FPKM.TMMnormalized.Sample_DJ_HsSc_12RJ_1019	FPKM.TMMnormalized.Sample_DJ_HsSc_13WJ_1019	FPKM.TMMnormalized.Sample_DJ_HsSc_14NJ_1019	FPKM.TMMnormalized.Sample_DJ_HsSc_15RJ_1019	FPKM.TMMnormalized.Sample_DJ_HsSc_16WJ_1019	FPKM.TMMnormalized.Sample_DJ_HsSc_17NJ_1019	FPKM.TMMnormalized.Sample_DJ_HsSc_18RJ_1019
chr9:97690666:97692020	chr9	97690666	97692020	.	1355	4.29471	5.6441	1.26452e-13	9.12476e-10	2.73387	48.8706	73.1077	2.33231	60.849	92.6442	8.02442	55.5724	92.1799	2.01762	36.0668	53.954	1.72126	44.907	68.3721	5.92208	41.0128	68.0294
chr8:135904122:135905782	chr8	135904122	135905782	.	1661	2.54163	6.77584	1.81815e-13	1.04958e-09	20.9597	145.254	163.53	24.1006	149.357	159.731	31.2061	155.603	123.948	12.6187	87.4498	98.453	14.5097	89.9197	96.1658	18.7875	93.6801	74.6226
chr9:4225137:4226163	chr9	4225137	4226163	.	1027	2.36454	6.80759	6.2984e-13	2.01997e-09	22.7823	172.404	140.444	28.7652	163.739	124.59	29.4229	160.542	152.592	22.1833	167.872	136.751	28.009	159.434	121.315	28.6493	156.322	148.58
chr2:167991033:167991790	chr2	167991033	167991790	.	758	5.61734	4.9582	1.12988e-12	2.96481e-09	1.82258	21.7202	68.298	0.777438	33.1904	68.1521	0.891602	26.2425	46.3503	2.40446	28.6547	90.1029	1.02564	43.7868	89.9104	1.17626	34.6207	61.1482
chr3:106447000:106447778	chr3	106447000	106447778	.	779	2.63711	6.43992	2.17707e-12	5.23657e-09	29.1613	93.6686	135.634	13.2164	119.485	143.758	21.3985	96.6342	116.136	37.4343	120.242	174.113	16.9659	153.383	184.542	27.4691	124.049	149.084
chr4:4428573:4430134	chr4	4428573	4430134	.	1562	4.87354	5.44952	3.13222e-12	6.9545e-09	0	50.2281	68.298	6.99694	26.5523	115.007	0.891602	40.1356	72.9106	0	32.1563	43.7247	4.47948	16.9989	73.6278	0.570808	25.695	46.6778
chr1:68444600:68446023	chr1	68444600	68446023	.	1424	2.21413	6.9066	4.86971e-12	1.004e-08	27.3387	181.907	185.655	35.7621	157.101	159.731	44.5801	120.407	156.237	19.1985	127.744	130.376	25.1139	110.324	112.171	31.3063	84.5553	109.717
chr3:62897005:62897848	chr3	62897005	62897848	.	844	8.574	5.17785	5.28219e-12	1.01643e-08	0	57.0156	45.2113	0	97.3584	23.4273	0	55.8811	35.4137	0	67.5541	53.5679	0	115.354	27.7574	0	66.2098	41.9594
chr17:17054260:17055755	chr17	17054260	17055755	.	1496	3.7385	5.4023	6.30887e-12	1.13812e-08	3.64516	32.5804	93.3085	9.32925	21.0206	102.228	6.24122	29.9473	69.7859	2.4366	21.7783	62.372	6.23613	14.0512	68.3343	4.17194	20.0183	46.6483
chr4:96426202:96427902	chr4	96426202	96427902	.	1701	2.24886	6.69286	9.88484e-12	1.67833e-08	33.7177	147.969	163.53	28.7652	94.0394	173.575	33.8809	120.407	123.427	19.8223	86.9895	96.1378	16.9108	55.2848	102.043	19.9182	70.7859	72.5616
chr12:85486304:85487478	chr12	85486304	85487478	.	1175	2.33973	6.56061	1.07221e-11	1.71935e-08	21.871	108.601	146.215	33.4298	74.1252	144.823	30.3145	130.286	145.301	18.6136	92.4266	124.439	28.4509	63.0852	123.254	25.7996	110.882	123.66
chr17:44133735:44135058	chr17	44133735	44135058	.	1324	2.59207	6.16439	1.58198e-11	2.07556e-08	30.9839	43.4405	132.748	27.9878	45.3602	146.953	12.4824	38.5919	153.112	23.4017	32.81	100.263	21.1388	34.2599	110.992	9.42782	29.148	115.644
chr6:106040296:106041253	chr6	106040296	106041253	.	958	4.04154	5.40841	1.87489e-11	2.3529e-08	1.82258	35.2954	73.1077	2.33231	38.7221	80.9306	8.91602	62.6733	63.5364	1.90248	36.8428	76.3128	2.43457	40.4197	84.4787	9.30692	65.421	66.3219
chr8:105187717:105188648	chr8	105187717	105188648	.	932	2.48955	6.42616	5.05328e-11	5.57137e-08	10.9355	191.41	100.042	19.4359	125.017	88.3847	15.1572	140.475	72.3899	11.7333	205.375	107.341	20.854	134.138	94.8334	16.2631	150.724	77.6715
chr9:72513322:72514338	chr9	72513322	72514338	.	1017	1.85459	6.85612	6.20748e-11	6.39903e-08	51.0322	105.886	177.96	47.4237	111.741	201.262	55.2794	101.574	177.59	50.1792	104.116	174.985	46.631	109.873	197.897	54.3553	99.8761	174.621
chr4:145630230:145632070	chr4	145630230	145632070	.	1841	1.84608	6.99544	1.89707e-10	1.82524e-07	60.1451	119.461	179.883	45.0914	181.441	182.094	40.1221	165.173	161.445	32.6698	64.8894	97.7096	24.4929	98.5555	98.9103	21.7937	89.7194	87.6942
chr5:124469767:124470981	chr5	124469767	124470981	.	1215	2.42727	5.96322	2.06875e-10	1.9262e-07	18.2258	48.8706	126.977	20.9908	32.084	94.774	26.7481	45.3841	132.802	15.0007	40.2227	104.507	17.2764	26.4066	78.0033	22.0149	37.3532	109.302
chr3:106483967:106484666	chr3	106483967	106484666	.	700	3.46212	5.40608	2.67955e-10	2.41695e-07	6.37903	66.5183	42.3255	2.33231	48.6792	55.3735	6.24122	73.479	65.6196	9.1129	95.0261	60.465	3.33188	69.5417	79.1051	8.91602	104.97	93.7423
chr4:114303936:114305033	chr4	114303936	114305033	.	1098	4.48643	4.77457	4.75303e-10	3.81087e-07	0	8.14509	73.1077	6.2195	11.0635	54.3087	1.7832	10.497	66.6612	0	7.41812	66.5826	5.66439	10.076	49.4614	1.62405	9.56011	60.7114
chr7:111570982:111572611	chr7	111570982	111572611	.	1630	2.6017	6.67157	5.82257e-10	4.4227e-07	1.82258	206.342	105.814	17.8811	199.142	80.9306	22.2901	197.591	73.9522	1.11815	126.59	64.9164	10.97	122.173	49.6507	13.6749	121.221	45.3695
chr10:130426810:130428416	chr10	130426810	130428416	.	1607	2.2227	6.33804	1.40437e-09	9.6868e-07	20.9597	124.891	70.2219	28.7652	128.336	109.682	10.6992	116.702	105.2	13.0427	77.7171	43.6975	17.8999	79.8607	68.2528	6.65789	72.621	65.4634
chr3:106279019:106280149	chr3	106279019	106280149	.	1131	3.76673	5.11763	1.40953e-09	9.6868e-07	1.82258	74.6633	34.63	3.88719	59.7427	34.076	2.67481	40.7531	49.4751	1.61148	66.0153	30.6189	3.43695	52.8229	30.1291	2.36499	36.0328	43.7445
chr3:153618557:153619893	chr3	153618557	153619893	.	1337	2.62836	5.62376	1.5071e-09	1.01165e-06	10.9355	52.9431	94.2705	17.8811	23.2333	78.8008	14.2656	41.6793	95.8254	8.17912	39.5984	70.5089	13.374	17.3772	58.9385	10.6699	31.1737	71.672
chr7:83671499:83672301	chr7	83671499	83672301	.	803	3.23239	5.16092	1.94404e-09	1.24695e-06	5.46774	36.6529	59.6405	5.44207	47.5729	73.4764	7.13282	35.1958	40.1009	6.80914	45.645	74.2721	6.77717	59.2439	91.5024	8.88271	43.8304	49.9388
chr1:86088444:86089338	chr1	86088444	86089338	.	895	2.5041	6.00199	2.24579e-09	1.35047e-06	11.8468	108.601	44.2494	11.6616	117.273	71.3467	6.24122	136.152	55.7246	13.2366	121.342	49.4407	13.0297	131.031	79.717	6.97343	152.125	62.2621
chr17:70609641:70611877	chr17	70609641	70611877	.	2237	2.23613	6.36606	2.37865e-09	1.40117e-06	44.6532	80.0934	145.253	35.7621	39.8284	118.201	13.374	72.5528	177.59	19.9612	35.8039	64.9323	15.9867	17.8044	52.8392	5.97856	32.4331	79.3874
chr7:17572338:17573566	chr7	17572338	17573566	.	1229	2.95504	5.6183	2.6521e-09	1.50099e-06	2.73387	58.3732	45.2113	12.439	78.5505	62.8277	6.24122	96.6342	63.5364	2.22447	47.4965	36.7871	10.1212	63.9142	51.121	5.07829	78.6283	51.6977
chr18:73255664:73256928	chr18	73255664	73256928	.	1265	2.77804	6.09256	4.50394e-09	2.28073e-06	33.7177	44.798	132.748	8.55182	96.2521	119.266	5.34961	86.4459	73.9522	26.6543	35.4134	104.939	6.76033	76.0886	94.2815	4.22894	68.3367	58.4603
chr6:161458941:161460000	chr6	161458941	161460000	.	1060	1.51447	7.22501	4.96441e-09	2.47056e-06	61.9677	238.923	138.52	55.1981	224.588	152.277	41.0137	259.646	160.924	58.4601	225.399	130.679	52.0737	211.876	143.658	38.6922	244.95	151.815
chr1:205902604:205903459	chr1	205902604	205903459	.	856	3.24915	5.2477	5.77136e-09	2.77641e-06	7.29032	17.6477	58.6786	2.33231	44.2538	61.7628	10.6992	52.1763	70.8275	8.51673	20.6165	68.5497	2.72467	51.6984	72.1528	12.4991	60.9536	82.7424
chr12:31624307:31625500	chr12	31624307	31625500	.	1194	4.03471	4.78814	6.06514e-09	2.86991e-06	0	21.7202	39.4397	6.2195	25.4459	42.595	2.67481	22.5377	72.3899	0	18.1912	33.0316	5.20896	21.3115	35.6742	2.24021	18.8758	60.628
chr8:25249997:25250927	chr8	25249997	25250927	.	931	4.80299	4.40458	7.6438e-09	3.50207e-06	2.73387	24.4353	50.0211	1.55488	11.0635	44.7248	0	12.0407	32.8098	2.93649	26.2463	53.7283	1.67011	11.8834	48.0395	0	12.9331	35.2415
chr9:4292476:4293810	chr9	4292476	4293810	.	1335	1.67639	6.53521	8.40737e-09	3.79173e-06	36.4516	101.814	155.835	47.4237	78.5505	129.915	46.3633	92.9294	132.281	27.3046	76.2649	116.73	35.5234	58.8394	97.3145	34.7291	69.61	99.0867
chr11:96011337:96013244	chr11	96011337	96013244	.	1908	2.30393	5.61526	1.02209e-08	4.46996e-06	17.3145	46.1555	72.1458	17.1036	38.7221	108.617	17.832	32.1085	79.1601	9.07469	24.1905	37.8122	8.96417	20.2946	56.9273	9.34594	16.8283	41.4885
chr4:96225776:96226816	chr4	96225776	96226816	.	1041	2.59741	5.66882	1.11646e-08	4.73904e-06	16.4032	62.4457	63.4883	7.77438	100.677	63.8926	5.34961	73.479	52.079	15.7572	59.9863	60.9878	7.46818	96.7122	61.3761	5.13892	70.585	50.0279
chr4:36552948:36554465	chr4	36552948	36554465	.	1518	2.72021	5.39299	1.10904e-08	4.73904e-06	6.37903	38.0104	78.8794	9.32925	37.6157	56.4384	13.374	64.5257	58.3285	4.20226	25.0398	51.9627	6.14575	24.7798	37.1795	8.8103	42.507	38.4246
chr8:104991941:104993448	chr8	104991941	104993448	.	1508	2.0839	6.20777	1.33486e-08	5.42543e-06	10.0242	138.467	72.1458	13.9939	123.911	68.1521	24.0733	137.387	64.578	6.64734	91.8213	47.842	9.27976	82.1689	45.1937	15.9637	91.1056	42.8236
chr2:12458090:12459390	chr2	12458090	12459390	.	1301	4.35779	4.77104	1.3689e-08	5.42543e-06	0	25.7928	42.3255	5.44207	37.6157	30.8814	0	36.7395	51.5582	0	19.8254	32.5331	4.18299	28.913	23.7367	0	28.2394	39.6297
chr4:148260941:148262020	chr4	148260941	148262020	.	1080	2.16417	5.95442	1.36685e-08	5.42543e-06	11.8468	73.3058	87.5369	16.3262	77.4442	90.5145	32.0977	64.217	92.1799	10.9692	67.8758	81.0526	15.1168	71.7076	83.8097	29.7201	59.4602	85.3518
chr5:45793822:45794520	chr5	45793822	45794520	.	699	3.7006	4.6844	1.39943e-08	5.42543e-06	1.82258	19.0052	51.9449	6.2195	29.8713	41.5302	1.7832	24.0814	41.6632	2.60741	27.1891	74.3132	8.89772	42.7344	59.4137	2.55108	34.4512	59.604
chr2:235410771:235411770	chr2	235410771	235411770	.	1000	2.06809	6.05517	1.40974e-08	5.42543e-06	35.5403	52.9431	111.585	17.1036	61.9554	119.266	22.2901	80.2712	83.8472	35.5403	52.9431	111.585	17.1036	61.9554	119.266	22.2901	80.2712	83.8472
chr6:106056381:106057466	chr6	106056381	106057466	.	1086	3.37447	5.06593	1.51323e-08	5.67245e-06	1.82258	36.6529	67.336	2.33231	34.2967	45.7897	10.6992	46.619	42.184	1.67825	33.7504	62.0037	2.14762	31.5808	42.1636	9.85196	42.9273	38.8435
chr7:104944628:104945316	chr7	104944628	104945316	.	689	3.36759	4.93062	1.65996e-08	6.10216e-06	1.82258	55.6581	38.4777	6.2195	36.5094	42.595	3.56641	34.2696	43.7464	2.64525	80.781	55.8458	9.02686	52.989	61.8215	5.17621	49.7382	63.4926
chr9:72645857:72646863	chr9	72645857	72646863	.	1007	1.42035	7.3496	1.9163e-08	6.74536e-06	56.5	166.974	205.856	75.4115	241.183	174.64	83.8106	251.619	197.38	56.1072	165.814	204.425	74.8873	239.507	173.426	83.228	249.87	196.007
chr6:75905448:75906992	chr6	75905448	75906992	.	1545	1.61785	6.78115	2.14524e-08	7.37145e-06	50.121	171.047	135.634	52.8658	110.635	168.25	34.7725	132.447	122.386	32.4407	110.71	87.789	34.2173	71.6081	108.9	22.5065	85.7265	79.2141
chr9:44539634:44540531	chr9	44539634	44540531	.	898	2.59162	5.34592	2.21898e-08	7.53515e-06	6.37903	43.4405	68.298	9.32925	34.2967	63.8926	16.9404	44.1492	65.6196	7.1036	48.3747	76.0557	10.3889	38.1923	71.1498	18.8646	49.1639	73.073
chr11:68842878:68843669	chr11	68842878	68843669	.	792	4.91299	4.5065	2.68255e-08	8.7653e-06	2.73387	24.4353	27.8964	0	44.2538	33.0112	0	33.6522	25.5187	3.45186	30.8526	35.2227	0	55.876	41.6807	0	42.4901	32.2206
chr10:4822845:4823329	chr10	4822845	4823329	.	485	5.73491	3.98103	2.70272e-08	8.7653e-06	0	4.07255	52.9069	0.777438	9.95711	25.557	0.891602	7.71839	27.0811	0	8.397	109.086	1.60296	20.5301	52.6949	1.83836	15.9142	55.8373
chr13:53360751:53361750	chr13	53360751	53361750	.	1000	3.84411	4.8508	3.01815e-08	9.64774e-06	0	32.5804	57.7166	1.55488	14.3825	43.6599	9.80763	23.4639	62.4948	0	32.5804	57.7166	1.55488	14.3825	43.6599	9.80763	23.4639	62.4948
chr10:101426395:101427379	chr10	101426395	101427379	.	985	1.48025	6.86603	3.33388e-08	1.03472e-05	75.6371	76.0209	214.513	59.8627	113.954	187.418	67.7618	75.9489	166.132	76.7889	77.1785	217.78	60.7743	115.689	190.272	68.7937	77.1055	168.662
chr11:28588086:28588630	chr11	28588086	28588630	.	545	6.21723	3.96489	3.8208e-08	1.16088e-05	0.91129	9.50261	22.1247	0	19.9142	25.557	0	12.0407	35.9345	1.67209	17.436	40.5958	0	36.5399	46.8936	0	22.093	65.9349
chr2:109209936:109212144	chr2	109209936	109212144	.	2209	1.561	6.52367	4.24109e-08	1.27515e-05	38.2742	97.7411	131.786	41.2042	89.614	142.693	53.4961	100.956	119.261	17.3265	44.2468	59.6588	18.6529	40.5677	64.5964	24.2174	45.7023	53.9887
chr5:124464635:124465625	chr5	124464635	124465625	.	991	2.01293	5.71601	5.27995e-08	1.55511e-05	18.2258	43.4405	79.8413	24.878	55.3173	85.1901	19.6153	43.5317	89.5759	18.3913	43.835	80.5664	25.1039	55.8197	85.9637	19.7934	43.927	90.3894
chr18:20401726:20402717	chr18	20401726	20402717	.	992	2.36053	5.30705	5.42833e-08	1.58266e-05	14.5806	20.3627	81.7652	17.1036	11.0635	73.4764	15.1572	21.6115	86.4512	14.6982	20.5269	82.4246	17.2416	11.1527	74.069	15.2795	21.7858	87.1484
chr4:157593906:157594786	chr4	157593906	157594786	.	881	3.57547	4.75257	5.51646e-08	1.59227e-05	5.46774	42.083	27.8964	2.33231	43.1475	45.7897	0.891602	31.491	32.289	6.20629	47.7673	31.6644	2.64735	48.9756	51.9746	1.01203	35.7446	36.6504
chr4:105981617:105982900	chr4	105981617	105982900	.	1284	2.48986	5.36008	7.04399e-08	1.95498e-05	7.29032	52.9431	63.4883	12.439	36.5094	59.6331	9.80763	66.9956	46.3503	5.67782	41.2329	49.4457	9.6877	28.4341	46.4432	7.63834	52.1772	36.0984
chr15:93524430:93525071	chr15	93524430	93525071	.	642	2.72497	4.98741	7.97923e-08	2.15245e-05	6.37903	13.5752	69.2599	10.8841	27.6586	58.5682	9.80763	21.6115	54.1622	9.93618	21.1451	107.882	16.9535	43.082	91.2277	15.2767	33.6627	84.3648
chr11:13156749:13157412	chr11	13156749	13157412	.	664	6.34696	4.01135	8.06785e-08	2.15621e-05	0	6.78758	40.4016	0.777438	14.3825	44.7248	0	18.5241	7.81186	0	10.2223	60.8458	1.17084	21.6604	67.3566	0	27.8978	11.7648
chr6:108930113:108931451	chr6	108930113	108931451	.	1339	2.20556	5.78516	8.30398e-08	2.19895e-05	10.0242	48.8706	123.129	24.1006	76.3378	70.2818	22.2901	38.9007	70.8275	7.48633	36.4978	91.9558	17.9989	57.0111	52.4883	16.6468	29.052	52.8958
chr19:6610926:6612158	chr19	6610926	6612158	.	1233	2.39931	5.38817	9.09658e-08	2.38694e-05	19.1371	19.0052	82.7271	16.3262	43.1475	84.1252	8.02442	26.5512	65.0988	15.5208	15.4138	67.0942	13.241	34.9939	68.2281	6.50805	21.5339	52.7971
chr4:96431514:96432770	chr4	96431514	96432770	.	1257	2.23409	5.56998	1.03146e-07	2.68217e-05	9.1129	63.8032	50.0211	10.1067	75.2315	55.3735	17.832	64.5257	68.2235	7.24972	50.7583	39.794	8.04033	59.85	44.0521	14.1862	51.3331	54.2749
chr8:128295609:128296646	chr8	128295609	128296646	.	1038	3.78707	4.66614	1.04587e-07	2.69535e-05	0	28.5078	41.3636	6.99694	34.2967	35.1409	0.891602	25.9338	42.184	0	27.4642	39.8493	6.74079	33.0411	33.8544	0.858962	24.9844	40.6397
chr2:101371212:101372565	chr2	101371212	101372565	.	1354	4.29579	4.37436	1.17484e-07	2.97461e-05	0	16.2902	31.7441	1.55488	38.7221	29.8165	2.67481	25.0076	27.6019	0	12.0312	23.4447	1.14836	28.5983	22.0211	1.97549	18.4694	20.3854
chr2:157912322:157913309	chr2	157912322	157913309	.	988	3.37424	4.89699	1.23511e-07	3.0733e-05	0	33.9379	46.1733	7.77438	28.765	56.4384	4.45801	44.7666	32.289	0	34.3501	46.7341	7.8688	29.1144	57.1239	4.51216	45.3104	32.6812
chr7:124776191:124777701	chr7	124776191	124777701	.	1511	1.92187	5.77409	1.23111e-07	3.0733e-05	24.6048	62.4457	95.2324	26.4329	40.9348	76.6711	18.7237	41.3705	93.2215	16.2838	41.3274	63.0261	17.4936	27.0912	50.7419	12.3916	27.3796	61.6952
chr3:62907806:62908642	chr3	62907806	62908642	.	837	4.81107	4.53755	1.25595e-07	3.09844e-05	0	51.5856	22.1247	1.55488	43.1475	12.7785	0	45.3841	19.79	0	61.6315	26.4333	1.85768	51.5502	15.267	0	54.2223	23.644
chr21:43061200:43063175	chr21	43061200	43063175	.	1976	2.44746	5.17465	1.39163e-07	3.34733e-05	17.3145	13.5752	70.2219	11.6616	26.5523	73.4764	8.91602	25.3163	64.0572	8.7624	6.87002	35.5374	5.9016	13.4374	37.1844	4.51216	12.8119	32.4176
chr21:32090354:32091296	chr21	32090354	32091296	.	943	2.70087	5.19349	1.5979e-07	3.81171e-05	7.29032	70.5908	38.4777	3.10975	55.3173	37.2707	6.24122	65.7606	32.8098	7.73099	74.8577	40.8035	3.29772	58.661	39.5235	6.61847	69.7356	34.793
chr21:47875163:47875552	chr21	47875163	47875552	.	390	4.4109	4.29967	1.67092e-07	3.92109e-05	1.82258	2.71503	45.2113	0	16.5952	54.3087	4.45801	4.3223	35.9345	4.67328	6.96162	115.927	0	42.5518	139.253	11.4308	11.0828	92.1398
chr5:174771414:174772035	chr5	174771414	174772035	.	622	2.01073	5.5698	1.6884e-07	3.92368e-05	16.4032	33.9379	72.1458	23.3231	46.4665	87.3198	18.7237	37.6657	78.1186	26.3717	54.5625	115.99	37.497	74.705	140.386	30.1023	60.5558	125.593
chr20:49982143:49983585	chr20	49982143	49983585	.	1443	1.31713	7.00619	2.03202e-07	4.54668e-05	52.8548	175.119	136.596	55.1981	189.185	151.212	52.6045	215.806	115.095	36.6284	121.358	94.6611	38.2523	131.105	104.79	36.455	149.554	79.7607
chr1:232512680:232513860	chr1	232512680	232513860	.	1181	2.96164	4.94067	2.17494e-07	4.79217e-05	1.82258	21.7202	50.983	9.32925	46.4665	36.2058	5.34961	43.5317	45.8296	1.54325	18.3914	43.1694	7.89945	39.3451	30.6569	4.52973	36.86	38.8057
chr5:97644427:97646339	chr5	97644427	97646339	.	1913	2.01947	5.70262	2.32048e-07	5.07411e-05	15.4919	55.6581	96.1944	31.0975	53.1046	67.0872	14.2656	36.7395	86.4512	8.09824	29.0947	50.2846	16.2559	27.7598	35.0691	7.45721	19.2052	45.1914
chr4:101940950:101943534	chr4	101940950	101943534	.	2585	1.31621	6.81093	2.44848e-07	5.2741e-05	70.1693	57.0156	202.008	75.4115	67.4871	182.094	79.3526	85.5197	177.069	27.1448	22.0563	78.1463	29.1727	26.1072	70.4425	30.6973	33.0831	68.4985
chr8:131203915:131204436	chr8	131203915	131204436	.	522	3.16417	4.61443	2.66587e-07	5.69983e-05	2.73387	20.3627	38.4777	6.2195	19.9142	35.1409	3.56641	35.8133	42.184	5.2373	39.0091	73.7121	11.9148	38.1498	67.3197	6.8322	68.6079	80.8123
chr17:59644441:59646548	chr17	59644441	59646548	.	2108	1.33942	7.18916	2.75473e-07	5.84652e-05	81.1048	99.0986	189.503	117.393	155.995	230.013	72.2198	88.2983	266.124	38.4748	47.0107	89.897	55.6893	74.0013	109.114	34.2599	41.8873	126.245
chr1:20085922:20086649	chr1	20085922	20086649	.	728	4.39024	4.13338	2.80246e-07	5.90439e-05	2.73387	16.2902	28.8583	1.55488	18.8079	42.595	0	11.4232	24.4771	3.75532	22.3766	39.6405	2.13582	25.835	58.5097	0	15.6912	33.6225
chr12:52834653:52835641	chr12	52834653	52835641	.	989	1.73475	6.08556	2.85621e-07	5.93105e-05	30.0726	95.0261	119.281	27.9878	63.0617	74.5413	23.1817	87.0634	78.1186	30.407	96.083	120.608	28.2991	63.7631	75.3704	23.4395	88.0317	78.9874
chr2:157421161:157422212	chr2	157421161	157422212	.	1052	2.92608	4.7899	2.84856e-07	5.93105e-05	8.20161	39.3679	34.63	3.88719	27.6586	35.1409	3.56641	33.6522	48.9543	7.79621	37.422	32.9182	3.69505	26.2915	33.4039	3.39012	31.9887	46.5345
chr3:182082379:182083850	chr3	182082379	182083850	.	1472	1.37478	6.70329	2.88859e-07	5.95546e-05	51.0322	108.601	150.063	65.3048	84.0823	185.288	65.087	78.4188	138.009	34.6686	73.778	101.945	44.3647	57.1211	125.875	44.2167	53.2736	93.7564
chr2:196311995:196312671	chr2	196311995	196312671	.	677	5.50236	3.9814	2.94806e-07	6.03494e-05	0	2.71503	30.7822	0	9.95711	20.2326	1.7832	20.0678	38.5385	0	4.01039	45.4685	0	14.7077	29.8857	2.63398	29.6422	56.9254
chr6:139043752:139044803	chr6	139043752	139044803	.	1052	1.3448	6.83681	3.06934e-07	6.23897e-05	47.3871	92.311	171.226	82.4084	102.89	165.056	66.8702	120.716	165.611	45.0448	87.7481	162.762	78.335	97.8043	156.897	63.5648	114.749	157.425
chr10:114391230:114392613	chr10	114391230	114392613	.	1384	1.5661	6.35604	3.51903e-07	6.90975e-05	30.0726	74.6633	119.281	45.8688	116.166	91.5793	30.3145	109.292	105.72	21.7287	53.9475	86.1857	33.1422	83.9352	66.17	21.9035	78.9684	76.3876
chr6:56517157:56518298	chr6	56517157	56518298	.	1142	1.58174	6.25728	3.73939e-07	7.15344e-05	33.7177	69.2333	91.3846	48.9786	64.168	133.109	30.3145	87.0634	116.136	29.5252	60.6246	80.0216	42.8884	56.1892	116.558	26.5451	76.2376	101.695
chr10:4284591:4285361	chr10	4284591	4285361	.	771	2.95738	4.73068	4.04466e-07	7.53195e-05	3.64516	21.7202	81.7652	6.99694	21.0206	36.2058	8.02442	17.2892	30.7266	4.72783	28.1715	106.051	9.07515	27.264	46.9595	10.4078	22.4244	39.853
chr13:76059368:76060253	chr13	76059368	76060253	.	886	2.19307	5.52733	4.02603e-07	7.53195e-05	14.5806	39.3679	73.1077	6.99694	38.7221	94.774	30.3145	36.122	68.7443	16.4567	44.4333	82.5143	7.89722	43.7044	106.968	34.215	40.7698	77.5895
chrX:132325448:132326289	chrX	132325448	132326289	.	842	2.93137	4.97012	4.25187e-07	7.84375e-05	3.64516	36.6529	17.315	6.99694	61.9554	52.1789	3.56641	44.4579	42.184	4.32917	43.5308	20.5641	8.30991	73.5812	61.9702	4.23564	52.8004	50.0998
chr6:147384485:147385449	chr6	147384485	147385449	.	965	1.86189	6.03626	4.26645e-07	7.84375e-05	16.4032	81.4509	136.596	33.4298	39.8284	75.6062	31.2061	77.1839	85.4096	16.9982	84.4051	141.55	34.6423	41.273	78.3484	32.3379	79.9833	88.5074
chr8:121839572:121840676	chr8	121839572	121840676	.	1105	2.17905	5.54591	4.42206e-07	8.02758e-05	11.8468	62.4457	53.8688	16.3262	96.2521	48.9843	6.24122	57.4248	55.2038	10.7211	56.512	48.7501	14.7748	87.1059	44.3297	5.64816	51.9681	49.9582
chr4:153617951:153618553	chr4	153617951	153618553	.	603	2.42509	5.29331	4.90893e-07	8.69271e-05	19.1371	57.0156	58.6786	3.88719	42.0411	50.0492	8.91602	40.4443	60.4117	31.7365	94.5533	97.311	6.44642	69.72	83.0003	14.7861	67.0719	100.185
chr2:101680396:101682290	chr2	101680396	101682290	.	1895	1.91581	5.51333	5.22361e-07	9.19356e-05	20.9597	28.5078	79.8413	20.2134	40.9348	86.2549	20.5069	32.726	68.2235	11.0605	15.0437	42.1326	10.6667	21.6015	45.5171	10.8216	17.2696	36.0019
chr6:55733676:55734498	chr6	55733676	55734498	.	823	1.41071	6.71592	5.47969e-07	9.54088e-05	27.3387	152.042	103.89	53.6432	162.633	104.358	46.3633	151.898	130.718	33.2183	184.741	126.233	65.1801	197.61	126.802	56.3345	184.566	158.832
chr1:203675318:203676189	chr1	203675318	203676189	.	872	2.5886	4.98642	5.63848e-07	9.6871e-05	6.37903	17.6477	46.1733	7.77438	44.2538	42.595	8.91602	44.7666	51.0375	7.3154	20.2382	52.951	8.91557	50.7498	48.8475	10.2248	51.3379	58.5292
chr17:15393602:15394911	chr17	15393602	15394911	.	1310	2.02751	5.33893	5.67184e-07	9.6871e-05	19.1371	21.7202	86.5749	19.4359	11.0635	78.8008	20.5069	16.9804	76.5562	14.6085	16.5803	66.0877	14.8366	8.44539	60.1533	15.6541	12.9622	58.4398
chr16:28436543:28437118	chr16	28436543	28437118	.	576	3.10626	4.53924	6.07778e-07	0.000100821	3.64516	36.6529	35.5919	3.88719	21.0206	28.7516	3.56641	29.6386	33.3306	6.3284	63.6335	61.7915	6.74859	36.494	49.9161	6.19168	51.4559	57.8656
chr13:109833182:109834191	chr13	109833182	109834191	.	1010	2.93634	4.96229	6.01369e-07	0.000100821	2.73387	8.14509	56.7547	9.32925	15.4888	68.1521	9.80763	46.619	46.8711	2.7068	8.06445	56.1927	9.23689	15.3355	67.4773	9.71052	46.1575	46.4071
chr1:203638839:203639369	chr1	203638839	203639369	.	531	2.66902	4.84501	6.2671e-07	0.000103368	8.20161	16.2902	32.7061	7.77438	29.8713	44.7248	6.24122	32.4172	64.0572	15.4456	30.6783	61.5934	14.641	56.2549	84.2275	11.7537	61.0494	120.635
chr9:41819452:41820201	chr9	41819452	41820201	.	750	2.81209	4.70613	6.44696e-07	0.00010573	5.46774	28.5078	29.8202	5.44207	30.9777	57.5033	6.24122	23.7726	35.4137	7.29032	38.0104	39.7603	7.25609	41.3036	76.6711	8.32162	31.6968	47.2183
chr5:102272948:102274032	chr5	102272948	102274032	.	1085	2.4666	5.03718	6.98784e-07	0.000113953	15.4919	31.2229	80.8033	9.32925	9.95711	60.6979	9.80763	15.4368	51.0375	14.2783	28.7768	74.473	8.59839	9.17706	55.9428	9.03929	14.2274	47.0391
chr19:48163609:48164145	chr19	48163609	48164145	.	537	3.33081	4.55295	7.22031e-07	0.000116429	4.55645	0	45.2113	2.33231	9.95711	60.6979	9.80763	2.46988	61.9741	8.48501	0	84.1924	4.34323	18.5421	113.032	18.2637	4.59941	115.408
chr5:166721785:166722834	chr5	166721785	166722834	.	1050	1.76577	6.21548	7.56599e-07	0.000121325	14.5806	150.684	43.2875	16.3262	172.59	58.5682	9.80763	151.898	39.5801	13.8863	143.509	41.2262	15.5488	164.371	55.7792	9.3406	144.665	37.6953
chr4:170265888:170267284	chr4	170265888	170267284	.	1397	2.19954	5.29341	7.76354e-07	0.000123125	10.9355	51.5856	49.0591	12.439	66.3807	50.0492	7.13282	50.0151	43.2256	7.82783	36.926	35.1175	8.90408	47.5166	35.8262	5.10581	35.8018	30.9417
chr12:13744103:13745328	chr12	13744103	13745328	.	1226	5.8424	3.96927	7.73555e-07	0.000123125	0	17.6477	15.3911	0.777438	37.6157	8.51901	0	9.26206	38.5385	0	14.3945	12.5539	0.634126	30.6817	6.94862	0	7.5547	31.4343
chr16:35043083:35043577	chr16	35043083	35043577	.	495	4.38557	3.992	7.90174e-07	0.000123284	0.91129	1.35752	30.7822	3.88719	6.63807	46.8545	0	5.86597	33.3306	1.84099	2.74246	62.1862	7.85291	13.4102	94.6556	0	11.8504	67.3345
chr2:224968955:224969806	chr2	224968955	224969806	.	852	3.75406	4.39236	8.28739e-07	0.000125239	0	32.5804	23.0866	3.88719	37.6157	31.9463	1.7832	19.1416	28.1227	0	38.2399	27.097	4.56243	44.1499	37.4956	2.09296	22.4667	33.0078
chr11:95746861:95748183	chr11	95746861	95748183	.	1323	3.55273	4.36366	8.1885e-07	0.000125239	1.82258	27.1503	32.7061	2.33231	14.3825	14.9083	4.45801	17.9067	54.1622	1.37761	20.5218	24.7211	1.7629	10.8711	11.2685	3.36962	13.5349	40.9389
chr11:78076019:78076768	chr11	78076019	78076768	.	750	7.96347	3.52162	8.25116e-07	0.000125239	0	2.71503	25.9725	0	6.63807	14.9083	0	9.87953	27.0811	0	3.62004	34.63	0	8.85076	19.8777	0	13.1727	36.1081
chr2:11379832:11381094	chr2	11379832	11381094	.	1263	2.11879	5.24922	8.2198e-07	0.000125239	12.7581	24.4353	76.9555	18.6585	23.2333	71.3467	14.2656	33.9609	53.1206	10.1014	19.347	60.9307	14.7732	18.3953	56.4899	11.295	26.8891	42.0591
chr4:143470439:143471622	chr4	143470439	143471622	.	1184	1.11807	7.58266	8.54576e-07	0.000128471	89.3064	195.482	231.828	122.835	293.182	238.532	112.342	193.886	235.397	75.4277	165.103	195.801	103.746	247.62	201.463	94.8834	163.755	198.815
chr10:122918276:122919633	chr10	122918276	122919633	.	1358	2.75238	4.86814	8.7141e-07	0.000129156	5.46774	46.1555	47.1352	6.99694	37.6157	33.0112	2.67481	45.6928	25.5187	4.02632	33.9879	34.7093	5.15239	27.6994	24.3087	1.96967	33.6472	18.7914
chr1:193527110:193528541	chr1	193527110	193528541	.	1432	1.66741	5.86032	8.7703e-07	0.000129156	27.3387	57.0156	68.298	25.6555	66.3807	99.0335	24.0733	63.2908	78.6393	19.0913	39.8154	47.6941	17.9158	46.3553	69.1574	16.8109	44.1975	54.9157
chr20:9221487:9222800	chr20	9221487	9222800	.	1314	1.8944	5.85951	8.91387e-07	0.000130604	18.2258	74.6633	46.1733	30.3201	70.8061	84.1252	10.6992	81.5061	91.6591	13.8705	56.8214	35.1395	23.0746	53.8859	64.0222	8.14249	62.029	69.7558
chr7:22249744:22250826	chr7	22249744	22250826	.	1083	1.71699	6.03471	9.77096e-07	0.000139618	16.4032	66.5183	64.4502	37.317	86.295	117.136	25.8565	79.0363	83.8472	15.1461	61.4204	59.5108	34.4571	79.6814	108.159	23.8749	72.979	77.4213
chr6:102113822:102114717	chr6	102113822	102114717	.	896	3.35136	4.5251	1.03354e-06	0.000146956	0.91129	32.5804	24.0486	4.66463	39.8284	37.2707	1.7832	34.2696	19.79	1.01706	36.362	26.8399	5.20606	44.4514	41.5967	1.99018	38.2474	22.0871
chr9:46978670:46979228	chr9	46978670	46979228	.	559	3.1599	4.55499	1.07259e-06	0.000151762	0.91129	19.0052	33.668	10.1067	13.2761	52.1789	2.67481	22.2289	43.2256	1.63021	33.9986	60.229	18.08	23.7498	93.3433	4.78499	39.7656	77.3267
chr13:65685734:65687279	chr13	65685734	65687279	.	1546	1.96106	5.41002	1.10079e-06	0.000154991	15.4919	20.3627	66.3741	21.7683	22.1269	62.8277	23.1817	29.0211	105.2	10.0207	13.1712	42.9328	14.0804	14.3124	40.6389	14.9946	18.7718	68.0463
chr9:36102331:36103376	chr9	36102331	36103376	.	1046	1.35585	6.59738	1.11785e-06	0.000155873	32.8064	105.886	124.091	57.5304	91.8267	133.109	61.5206	117.937	132.802	31.3637	101.23	118.634	55.0004	87.7884	127.256	58.8151	112.75	126.961
chr9:43380749:43381410	chr9	43380749	43381410	.	662	2.1416	5.28813	1.1991e-06	0.000164814	8.20161	36.6529	55.7927	18.6585	27.6586	62.8277	13.374	51.8675	61.4533	12.3891	55.3669	84.279	28.1851	41.7804	94.9059	20.2025	78.3498	92.8297
chr3:30749183:30750379	chr3	30749183	30750379	.	1197	2.36725	4.97333	1.23791e-06	0.000167752	8.20161	31.2229	35.5919	9.32925	27.6586	46.8545	9.80763	39.8269	58.8493	6.8518	26.0843	29.7343	7.79386	23.1066	39.1433	8.19351	33.2722	49.164
chr8:60607341:60608532	chr8	60607341	60608532	.	1192	2.72127	4.61463	1.25198e-06	0.000168866	4.55645	21.7202	34.63	6.2195	23.2333	45.7897	7.13282	24.0814	39.5801	3.82253	18.2217	29.052	5.2177	19.491	38.4141	5.98391	20.2025	33.2048
chr8:105252180:105253487	chr8	105252180	105253487	.	1308	4.05015	4.89039	1.33273e-06	0.000176374	0	80.0934	7.69555	0	71.9125	18.1029	2.67481	55.8811	20.3108	0	61.2335	5.88345	0	54.9789	13.8401	2.04496	42.7226	15.5282
chr6:106123640:106124290	chr6	106123640	106124290	.	651	2.29125	5.12489	1.46424e-06	0.000191239	9.1129	33.9379	48.0972	10.1067	65.2744	52.1789	8.91602	35.1958	39.5801	13.9983	52.1319	73.882	15.5249	100.268	80.152	13.6959	54.0643	60.7989
chr7:80377426:80378185	chr7	80377426	80378185	.	760	2.67926	4.93701	1.50273e-06	0.000195382	20.0484	21.7202	56.7547	6.99694	5.53173	86.2549	3.56641	9.5708	53.6414	26.3794	28.5793	74.6772	9.2065	7.27859	113.493	4.69264	12.5932	70.5808
chr2:168365976:168366831	chr2	168365976	168366831	.	856	4.49155	3.97152	1.64124e-06	0.000210546	0	10.8601	35.5919	3.10975	17.7015	21.2975	0	14.5106	24.4771	0	12.6871	41.5793	3.63289	20.6794	24.8803	0	16.9516	28.5948
chr14:102729067:102729745	chr14	102729067	102729745	.	679	2.58969	4.88186	1.64902e-06	0.000210607	4.55645	25.7928	27.8964	4.66463	42.0411	45.7897	10.6992	42.6055	46.3503	6.71053	37.9864	41.0845	6.86985	61.9162	67.4369	15.7573	62.7474	68.2627
chr2:235872249:235874224	chr2	235872249	235874224	.	1976	1.60946	6.00434	1.76537e-06	0.000221546	18.2258	93.6686	72.1458	33.4298	85.1886	94.774	24.0733	76.8751	67.7027	9.22358	47.4031	36.511	16.9179	43.1116	47.9625	12.1828	38.9044	34.2625
chr16:86985276:86986173	chr16	86985276	86986173	.	898	1.60535	6.06186	1.81164e-06	0.000225393	18.2258	77.3784	107.738	41.9816	65.2744	106.488	37.4473	48.7802	86.4512	20.296	86.1675	119.975	46.7502	72.6886	118.583	41.7008	54.3209	96.2708
chr7:41067090:41067454	chr7	41067090	41067454	.	365	4.05478	4.23183	1.82349e-06	0.000225894	0	40.7255	14.4292	2.33231	26.5523	27.6868	0.891602	26.5512	18.7485	0	111.577	39.5319	6.3899	72.746	75.8542	2.44275	72.7431	51.3656
chr9:41009203:41009714	chr9	41009203	41009714	.	512	2.78998	4.56613	1.86187e-06	0.000229082	3.64516	32.5804	35.5919	5.44207	25.4459	40.4653	6.24122	20.0678	32.289	7.11945	63.6335	69.5154	10.629	49.6991	79.0338	12.1899	39.1949	63.0645
chr4:108722882:108723589	chr4	108722882	108723589	.	708	3.07698	4.81232	1.90008e-06	0.000232389	0.91129	33.9379	45.2113	10.1067	35.4031	41.5302	0.891602	48.7802	22.394	1.28713	47.9349	63.8578	14.275	50.0043	58.6584	1.25933	68.8986	31.6299
chr12:60366805:60367762	chr12	60366805	60367762	.	958	1.62539	5.8732	1.93649e-06	0.000233141	24.6048	62.4457	64.4502	23.3231	95.1457	74.5413	23.1817	66.6868	80.2017	25.6835	65.1834	67.2758	24.3457	99.317	77.8093	24.198	69.6105	83.7179
chr1:76719606:76720635	chr1	76719606	76720635	.	1030	2.49426	5.02941	1.92126e-06	0.000233141	1.82258	39.3679	52.9069	15.5488	38.7221	44.7248	7.13282	35.5046	45.3088	1.7695	38.2213	51.3659	15.0959	37.5943	43.4221	6.92507	34.4705	43.9891
chr17:55937918:55939330	chr17	55937918	55939330	.	1413	3.36895	4.40453	1.93854e-06	0.000233141	0	24.4353	35.5919	4.66463	17.7015	23.4273	4.45801	26.2425	39.0593	0	17.2932	25.1889	3.30122	12.5276	16.5798	3.155	18.5722	27.6428
chr15:71737354:71738135	chr15	71737354	71738135	.	782	2.61371	4.84245	1.92905e-06	0.000233141	5.46774	13.5752	52.9069	5.44207	27.6586	52.1789	11.5908	40.1356	34.3722	6.992	17.3595	67.6559	6.95916	35.3691	66.725	14.822	51.3243	43.9542
chr4:36395673:36396997	chr4	36395673	36396997	.	1325	1.52591	6.32077	1.95349e-06	0.000233965	20.9597	88.2385	99.0802	53.6432	77.4442	137.369	36.5557	103.735	89.0552	15.8186	66.5951	74.7775	40.4854	58.4484	103.675	27.5892	78.2906	67.2114
chr18:47623812:47624815	chr18	47623812	47624815	.	1004	3.04729	4.44444	2.0823e-06	0.00024532	2.73387	23.0778	32.7061	4.66463	36.5094	26.6219	2.67481	26.86	27.0811	2.72298	22.9858	32.5758	4.64604	36.3639	26.5158	2.66415	26.753	26.9732
chr8:122176270:122176851	chr8	122176270	122176851	.	582	3.03923	4.58851	2.15012e-06	0.000252281	3.64516	36.6529	29.8202	2.33231	26.5523	42.595	4.45801	41.6793	16.1445	6.26316	62.9775	51.2375	4.00741	45.6225	73.1873	7.65981	71.6139	27.7397
chr3:32010301:32011132	chr3	32010301	32011132	.	832	1.73186	5.81465	2.21148e-06	0.000256248	20.0484	77.3784	48.0972	26.4329	55.3173	91.5793	16.9404	83.976	72.9106	24.0966	93.0029	57.8091	31.7703	66.4871	110.071	20.3611	100.933	87.633
chr21:36531683:36532555	chr21	36531683	36532555	.	873	2.3821	5.10904	2.21944e-06	0.000256248	8.20161	31.2229	59.6405	3.88719	18.8079	62.8277	24.0733	24.0814	64.578	9.39474	35.765	68.3167	4.45268	21.544	71.9676	27.5753	27.5846	73.9725
chr21:36519279:36520988	chr21	36519279	36520988	.	1710	2.95948	4.90199	2.37092e-06	0.000269872	0	47.513	21.1628	3.88719	60.849	26.6219	7.13282	49.3977	39.0593	0	27.7854	12.3759	2.27321	35.5842	15.5684	4.17124	28.8875	22.8417
chr6:135174253:135174883	chr6	135174253	135174883	.	631	1.63748	6.16456	2.35891e-06	0.000269872	10.9355	84.166	81.7652	40.4268	100.677	91.5793	30.3145	107.44	84.368	17.3304	133.385	129.58	64.0678	159.552	145.134	48.042	170.269	133.705
chr2:238135978:238136799	chr2	238135978	238136799	.	822	2.19711	5.36864	2.45297e-06	0.000276143	7.29032	73.3058	37.5158	6.2195	66.3807	47.9194	9.80763	86.4459	23.9564	8.869	89.1798	45.6397	7.56631	80.7552	58.2961	11.9314	105.165	29.144
chr7:25067950:25068466	chr7	25067950	25068466	.	517	3.7816	4.13655	2.45873e-06	0.000276143	0	10.8601	37.5158	4.66463	19.9142	38.3355	1.7832	12.6582	20.8316	0	21.006	72.5644	9.02249	38.5188	74.15	3.44914	24.4839	40.2933
chr1:231647584:231648522	chr1	231647584	231648522	.	939	2.01634	5.35958	2.51761e-06	0.000280573	11.8468	74.6633	50.983	9.32925	51.9982	55.3735	15.1572	47.854	41.6632	12.6164	79.5137	54.295	9.93531	55.3762	58.9708	16.1419	50.9627	44.3698
chr2:114735217:114736282	chr2	114735217	114736282	.	1066	2.79792	4.7906	2.51736e-06	0.000280573	3.64516	29.8653	70.2219	14.7713	5.53173	58.5682	4.45801	13.8931	36.9761	3.41947	28.0163	65.8742	13.8568	5.18924	54.942	4.182	13.0329	34.6868
chr7:41286562:41287816	chr7	41286562	41287816	.	1255	1.62751	6.0893	2.57819e-06	0.000285122	41.0081	65.1607	78.8794	36.5396	97.3584	109.682	16.9404	50.9413	104.158	32.6757	51.9209	62.8521	29.1152	77.5764	87.3962	13.4984	40.5907	82.9945
chr10:120059549:120060598	chr10	120059549	120060598	.	1050	3.73232	4.27227	2.59927e-06	0.000286339	0	25.7928	51.9449	6.2195	7.74442	27.6868	1.7832	6.48344	34.893	0	24.5646	49.4714	5.92334	7.37564	26.3684	1.69829	6.17471	33.2314
chr7:120723096:120725341	chr7	120723096	120725341	.	2246	1.97866	5.39514	2.60903e-06	0.000286339	13.6694	59.7307	34.63	10.8841	53.1046	69.2169	15.1572	56.4986	53.1206	6.08609	26.5942	15.4185	4.84601	23.6441	30.8179	6.74855	25.1552	23.6512
chr1:39662523:39663172	chr1	39662523	39663172	.	650	4.95067	3.76709	2.65379e-06	0.000287967	0	20.3627	12.5053	0.777438	14.3825	27.6868	0.891602	12.9669	20.8316	0	31.3273	19.2389	1.19606	22.1269	42.595	1.3717	19.9491	32.0486
chr2:92300606:92301449	chr2	92300606	92301449	.	844	1.21819	7.6106	2.6507e-06	0.000287967	178.613	242.995	214.513	88.6279	143.825	258.765	88.2686	181.845	347.888	211.627	287.909	254.163	105.009	170.409	306.593	104.584	215.456	412.19
chr7:36698066:36698938	chr7	36698066	36698938	.	873	1.7675	5.6499	2.70928e-06	0.000291793	12.7581	52.9431	80.8033	27.2103	43.1475	74.5413	22.2901	64.5257	59.8909	14.614	60.645	92.5581	31.1688	49.4244	85.3852	25.5327	73.9126	68.6035
chr14:68716345:68718107	chr14	68716345	68718107	.	1763	1.60062	6.41737	2.72392e-06	0.000292279	38.2742	92.311	171.226	31.875	39.8284	99.0335	75.7862	39.2094	168.736	21.7097	52.3602	97.1219	18.08	22.5913	56.1733	42.9871	22.2402	95.7096
chr18:47250067:47250841	chr18	47250067	47250841	.	775	1.92303	5.46881	2.80025e-06	0.000299358	20.0484	24.4353	76.9555	32.6524	17.7015	91.5793	10.6992	34.5784	75.5146	25.8689	31.5294	99.2974	42.1321	22.8407	118.167	13.8055	44.6172	97.4382
chr10:64143582:64144756	chr10	64143582	64144756	.	1175	2.15884	5.31824	2.90087e-06	0.000308544	13.6694	23.0778	84.651	28.7652	3.31904	90.5145	14.2656	6.17471	81.7641	11.6335	19.6406	72.0434	24.481	2.82471	77.0336	12.141	5.25507	69.5865
chr12:31635451:31636535	chr12	31635451	31636535	.	1085	1.80524	5.48216	2.91605e-06	0.000308544	16.4032	39.3679	67.336	16.3262	50.8919	61.7628	20.5069	57.7335	57.8077	15.1182	36.2838	62.0609	15.0472	46.905	56.9242	18.9003	53.2106	53.279
chr5:124394905:124395835	chr5	124394905	124395835	.	931	2.73306	4.57818	2.91825e-06	0.000308544	3.64516	21.7202	35.5919	6.2195	11.0635	38.3355	8.02442	28.4037	46.3503	3.91532	23.33	38.2298	6.68045	11.8834	41.1767	8.61914	30.5088	49.7855
chr9:22052090:22053128	chr9	22052090	22053128	.	1039	2.60045	5.0513	2.96941e-06	0.000310483	1.82258	40.7255	40.4016	3.88719	26.5523	60.6979	18.7237	44.4579	47.3919	1.75417	39.1968	38.8851	3.74128	25.5556	58.4196	18.0208	42.7891	45.613
chr3:193664203:193665683	chr3	193664203	193665683	.	1481	1.5665	5.96721	2.96206e-06	0.000310483	19.1371	70.5908	81.7652	24.878	66.3807	91.5793	41.9053	71.9353	81.7641	12.9217	47.6643	55.2095	16.7981	44.8216	61.8361	28.2953	48.5721	55.2087
chr17:70598792:70599935	chr17	70598792	70599935	.	1144	2.03091	5.12323	2.9565e-06	0.000310483	17.3145	31.2229	51.9449	11.6616	26.5523	60.6979	13.374	27.1687	60.4117	15.1351	27.2927	45.4064	10.1937	23.21	53.0576	11.6906	23.7489	52.8074
chr3:187121351:187121997	chr3	187121351	187121997	.	647	1.17042	6.83655	2.99551e-06	0.000311015	53.7661	131.679	118.319	57.5304	160.42	146.953	69.545	135.844	141.655	83.1006	203.522	182.873	88.9187	247.945	227.13	107.488	209.959	218.941
chr4:143012231:143013292	chr4	143012231	143013292	.	1062	1.98057	5.2206	3.13664e-06	0.000324501	10.9355	39.3679	61.5644	13.9939	30.9777	60.6979	19.6153	31.1823	54.683	10.2971	37.0696	57.9702	13.1769	29.1692	57.1544	18.4701	29.3618	51.4906
chr11:70005245:70006710	chr11	70005245	70006710	.	1466	3.42521	4.36088	3.1989e-06	0.000329761	6.37903	21.7202	51.9449	3.88719	21.0206	34.076	0	8.02712	27.6019	4.35132	14.816	35.4331	2.65156	14.3387	23.2442	0	5.47553	18.828
chr9:118434746:118435790	chr9	118434746	118435790	.	1045	1.76828	5.97722	3.26266e-06	0.000333949	31.8952	124.891	66.3741	10.1067	108.422	54.3087	13.374	81.5061	65.6196	30.5217	119.513	63.5159	9.67148	103.753	51.97	12.7981	77.9963	62.7939
chr9:66039079:66039900	chr9	66039079	66039900	.	822	2.60313	4.83265	3.29088e-06	0.000335647	0.91129	19.0052	50.0211	13.2164	29.8713	46.8545	8.91602	26.2425	47.3919	1.10863	23.1207	60.8529	16.0784	36.3398	57.0007	10.8467	31.9252	57.6544
chr10:42534686:42535512	chr10	42534686	42535512	.	827	1.16184	8.29274	3.34855e-06	0.000340325	263.363	452.053	413.636	125.168	211.312	354.604	197.936	254.707	536.935	318.456	546.617	500.164	151.351	255.516	428.783	239.342	307.989	649.256
chr10:42599378:42600439	chr10	42599378	42600439	.	1062	1.00401	10.3459	3.53677e-06	0.000354463	1224.77	1851.65	1611.26	485.121	1158.34	1380.08	797.984	1161.15	2030.56	1153.27	1743.55	1517.19	456.8	1090.72	1299.51	751.398	1093.37	1912.02
chr14:72943309:72944752	chr14	72943309	72944752	.	1444	1.74299	5.70699	3.93412e-06	0.000384931	25.5161	96.3836	57.7166	15.5488	53.1046	77.7359	17.832	53.72	61.9741	17.6704	66.7476	39.97	10.7678	36.776	53.8338	12.3491	37.2022	42.9183
chr5:93576647:93577709	chr5	93576647	93577709	.	1063	2.1265	5.43422	3.95122e-06	0.000385297	22.7823	50.2281	67.336	20.9908	32.084	53.2438	2.67481	42.6055	82.8057	21.432	47.2512	63.3453	19.7468	30.1825	50.0882	2.51628	40.0804	77.8981
chr1:170776340:170777336	chr1	170776340	170777336	.	997	2.11207	5.22646	4.39409e-06	0.000423457	7.29032	44.798	40.4016	22.5457	37.6157	70.2818	9.80763	27.7862	64.0572	7.31226	44.9328	40.5232	22.6135	37.7289	70.4933	9.83714	27.8698	64.25
chr16:49005427:49006182	chr16	49005427	49006182	.	756	2.78417	4.50641	4.40123e-06	0.000423457	3.64516	10.8601	36.5539	9.32925	19.9142	50.0492	3.56641	24.6988	31.7682	4.82164	14.3652	48.3517	12.3403	26.3416	66.2026	4.71747	32.6704	42.0214
chr1:173011664:173013062	chr1	173011664	173013062	.	1399	1.25645	6.8328	4.42188e-06	0.000424031	99.3306	131.679	198.16	54.4207	98.4648	152.277	51.7129	87.6809	140.613	71.0012	94.1237	141.644	38.8997	70.3822	108.847	36.9642	62.6739	100.51
chr5:83220509:83221622	chr5	83220509	83221622	.	1114	2.54911	5.17978	4.69127e-06	0.000445424	6.37903	62.4457	65.4122	0.777438	46.4665	30.8814	15.1572	53.4112	33.3306	5.72624	56.0554	58.7183	0.69788	41.7114	27.7212	13.6061	47.9454	29.9197
chr1:172839645:172841137	chr1	172839645	172841137	.	1493	1.06135	7.13605	4.98261e-06	0.000465756	67.4355	161.544	175.074	73.0792	167.058	154.407	96.2931	192.651	164.57	45.1678	108.201	117.263	48.9479	111.894	103.421	64.4964	129.036	110.228
chr6:128920665:128922400	chr6	128920665	128922400	.	1736	3.46711	4.32864	4.9861e-06	0.000465756	0	31.2229	13.4672	2.33231	22.1269	24.4921	4.45801	28.7124	39.0593	0	17.9855	7.75761	1.3435	12.7459	14.1084	2.56798	16.5394	22.4996
chr21:27762075:27762856	chr21	27762075	27762856	.	782	2.50128	5.18773	5.04775e-06	0.000469995	15.4919	59.7307	48.0972	11.6616	37.6157	59.6331	0	36.122	48.4335	19.8107	76.3819	61.5053	14.9125	48.102	76.2571	0	46.1919	61.9354
chr12:80291383:80291803	chr12	80291383	80291803	.	421	3.61348	4.34283	5.08778e-06	0.000471106	3.64516	23.0778	37.5158	4.66463	0	35.1409	0.891602	18.5241	44.2672	8.65834	54.8165	89.1112	11.0799	0	83.4701	2.11782	44.0003	105.148
chr13:51251657:51253023	chr13	51251657	51253023	.	1367	1.91256	5.71556	5.29026e-06	0.000483362	10.0242	97.7411	62.5263	10.1067	117.273	45.7897	14.2656	80.8887	24.4771	7.33299	71.5004	45.7398	7.39334	85.7883	33.4965	10.4357	59.1724	17.9057
chr10:101155247:101156623	chr10	101155247	101156623	.	1377	2.60231	4.95046	5.2918e-06	0.000483362	19.1371	36.6529	50.983	0.777438	24.3396	47.9194	6.24122	22.8464	56.7661	13.8977	26.6179	37.0247	0.564588	17.6758	34.7999	4.53247	16.5914	41.2245
chr13:80510575:80511394	chr13	80510575	80511394	.	820	3.07726	4.37861	5.46954e-06	0.000498022	3.64516	23.0778	35.5919	0.777438	19.9142	45.7897	8.02442	15.128	24.4771	4.44532	28.1436	43.4048	0.948095	24.2856	55.8411	9.78588	18.4488	29.8502
chr1:245452171:245452615	chr1	245452171	245452615	.	445	3.51983	3.94131	5.79313e-06	0.000524179	2.73387	10.8601	30.7822	1.55488	8.85076	28.7516	3.56641	5.86597	32.289	6.14353	24.4048	69.1735	3.4941	19.8894	64.6104	8.0144	13.182	72.5596
chr10:48601144:48602165	chr10	48601144	48602165	.	1022	2.23846	5.18711	5.90134e-06	0.000532301	19.1371	29.8653	51.9449	18.6585	25.4459	54.3087	1.7832	30.2561	81.2433	18.7251	29.2224	50.8268	18.2569	24.8982	53.1396	1.74482	29.6048	79.4944
chr17:57746108:57746906	chr17	57746108	57746906	.	799	1.64383	5.6093	6.07095e-06	0.000544198	21.871	31.2229	62.5263	25.6555	46.4665	66.0223	26.7481	41.3705	102.075	27.3729	39.0774	78.2557	32.1095	58.1558	82.6312	33.4769	51.7779	127.753
chr8:32578239:32579680	chr8	32578239	32579680	.	1442	2.17195	4.99469	6.4722e-06	0.000575411	8.20161	36.6529	51.9449	11.6616	24.3396	30.8814	9.80763	46.3103	51.5582	5.68766	25.4181	36.0228	8.08708	16.8791	21.4157	6.80141	32.1153	35.7547
chr17:74997976:74999034	chr17	74997976	74999034	.	1059	1.15698	6.60885	6.51996e-06	0.000577277	61.9677	69.2333	121.205	59.8627	73.0188	159.731	78.461	76.2576	164.57	58.5153	65.3761	114.452	56.5276	68.9507	150.832	74.0897	72.0091	155.401
chr16:28814720:28815142	chr16	28814720	28815142	.	423	2.28679	4.96637	6.54614e-06	0.000577822	7.29032	43.4405	46.1733	16.3262	26.5523	44.7248	3.56641	34.8871	45.3088	17.2348	102.696	109.157	38.5962	62.7714	105.732	8.43123	82.4754	107.113
chr9:4235703:4236716	chr9	4235703	4236716	.	1014	1.95756	5.5248	6.79135e-06	0.000597638	13.6694	73.3058	94.2705	24.1006	30.9777	43.6599	9.80763	61.1296	50.5167	13.4806	72.2937	92.9689	23.7678	30.55	43.0571	9.67222	60.2856	49.8192
chr7:83689789:83690467	chr7	83689789	83690467	.	679	3.13429	4.20658	6.85484e-06	0.000601392	3.64516	14.9327	47.1352	2.33231	6.63807	24.4921	5.34961	18.2154	29.1643	5.36842	21.9921	69.4186	3.43492	9.77625	36.0709	7.87867	26.8268	42.9518
chr12:19952138:19953307	chr12	19952138	19953307	.	1170	3.30003	4.6265	7.12577e-06	0.000613965	2.73387	48.8706	18.2769	0.777438	44.2538	17.038	0.891602	64.5257	10.4158	2.33664	41.7697	15.6213	0.664477	37.8238	14.5624	0.762053	55.1502	8.9024
chr5:123744241:123745278	chr5	123744241	123745278	.	1038	2.63193	4.65679	7.12358e-06	0.000613965	3.64516	24.4353	45.2113	13.9939	18.8079	37.2707	1.7832	25.0076	42.7048	3.51172	23.5407	43.5562	13.4816	18.1193	35.9062	1.71792	24.0921	41.1414
chr8:49320098:49321830	chr8	49320098	49321830	.	1733	1.333	6.27768	7.15893e-06	0.000614986	24.6048	108.601	86.5749	44.314	89.614	101.163	41.0137	98.4866	91.1383	14.1978	62.6666	49.9567	25.5707	51.7103	58.3746	23.6663	56.8301	52.5899
chr6:157956368:157957213	chr6	157956368	157957213	.	846	1.05512	7.09603	7.28828e-06	0.000620557	71.0806	119.461	195.275	113.506	89.614	214.04	111.45	96.3254	207.275	84.0197	141.207	230.821	134.168	105.927	253.002	131.738	113.86	245.005
chr7:126214270:126215613	chr7	126214270	126215613	.	1344	1.18616	6.69791	7.28409e-06	0.000620557	88.3951	86.881	170.264	51.3109	88.5076	152.277	56.171	103.426	123.948	65.7702	64.6436	126.685	38.1778	65.8539	113.302	41.7939	76.9541	92.2233
chr16:49082254:49083044	chr16	49082254	49083044	.	791	2.64331	4.57153	7.39331e-06	0.000627648	7.29032	32.5804	42.3255	7.77438	24.3396	37.2707	1.7832	20.6853	28.6435	9.21659	41.1888	53.5089	9.82855	30.7707	47.1184	2.25437	26.1508	36.2117
chr10:42597678:42598096	chr10	42597678	42598096	.	419	1.10019	9.44401	7.52266e-06	0.000634895	706.25	1016.78	952.324	248.78	588.576	724.116	327.218	627.35	1065.02	1685.56	2426.68	2272.85	593.747	1404.72	1728.2	780.95	1497.26	2541.8
chr7:156987132:156987985	chr7	156987132	156987985	.	854	4.42296	3.76066	7.50988e-06	0.000634895	0	4.07255	27.8964	2.33231	4.42538	24.4921	0.891602	16.0542	25.5187	0	4.76879	32.6655	2.73105	5.18195	28.6793	1.04403	18.7989	29.8814
chr13:44816930:44818999	chr13	44816930	44818999	.	2070	1.63185	5.77571	7.61631e-06	0.000637209	36.4516	63.8032	87.5369	31.875	24.3396	79.8657	17.832	38.5919	99.471	17.6095	30.8228	42.2883	15.3985	11.7583	38.5825	8.61452	18.6434	48.0536
chr1:121484167:121485328	chr1	121484167	121485328	.	1162	0.816739	13.0936	7.6806e-06	0.000640731	9409.98	11005.4	10716.1	4184.95	6652.46	9527.44	5931.83	7087.02	14144.1	8098.09	9471.06	9222.07	3601.5	5725.01	8199.18	5104.85	6098.99	12172.2
chr1:246317035:246317776	chr1	246317035	246317776	.	742	2.03484	4.948	7.75793e-06	0.000645317	15.4919	17.6477	62.5263	13.2164	13.2761	50.0492	12.4824	21.9202	56.7661	20.8786	23.784	84.2673	17.8119	17.8924	67.4517	16.8227	29.5421	76.5042
chr21:36523068:36523563	chr21	36523068	36523563	.	496	2.957	4.41608	7.85005e-06	0.000650493	3.64516	28.5078	43.2875	6.99694	22.1269	18.1029	0.891602	23.4639	31.7682	7.34911	57.4754	87.2731	14.1067	44.6107	36.4978	1.79759	47.3062	64.0488
chr8:105211338:105212942	chr8	105211338	105212942	.	1605	1.53943	6.05109	7.94092e-06	0.000653011	23.6935	139.824	53.8688	23.3231	120.592	58.5682	11.5908	96.0167	58.8493	14.7623	87.1178	33.5631	14.5315	75.135	36.4911	7.2217	59.8235	36.6662
chr10:42393922:42394932	chr10	42393922	42394932	.	1011	1.02738	9.65762	7.97405e-06	0.000653187	751.814	1236.7	1050.44	284.542	705.848	835.928	474.333	731.703	1185.84	743.634	1223.24	1039.01	281.446	698.169	826.832	469.172	723.742	1172.94
chr2:227199982:227201250	chr2	227199982	227201250	.	1269	3.8499	3.9647	8.23171e-06	0.000667416	0	9.50261	24.0486	1.55488	8.85076	28.7516	3.56641	23.1552	24.9979	0	7.48826	18.9508	1.22528	6.9746	22.6569	2.81041	18.2468	19.6989
chr12:63095984:63097409	chr12	63095984	63097409	.	1426	1.86391	5.35591	8.51918e-06	0.000686865	9.1129	57.0156	44.2494	11.6616	46.4665	47.9194	19.6153	63.5995	54.683	6.39053	39.9829	31.0304	8.17782	32.5852	33.6041	13.7554	44.5999	38.3471
chr2:92269153:92269642	chr2	92269153	92269642	.	490	1.1467	8.00189	8.54427e-06	0.000686969	218.71	357.027	348.224	86.2956	179.228	266.219	164.946	254.398	418.715	446.346	728.626	710.66	176.113	365.771	543.304	336.625	519.18	854.521
chr10:112086339:112086922	chr10	112086339	112086922	.	584	2.25575	5.13303	8.72698e-06	0.000697772	4.55645	32.5804	32.7061	15.5488	34.2967	76.6711	8.91602	61.4383	34.3722	7.80214	55.7883	56.0036	26.6246	58.7272	131.286	15.2672	105.203	58.8564
chr6:134076920:134077888	chr6	134076920	134077888	.	969	3.65919	4.03404	8.78372e-06	0.000700369	0	5.43006	46.1733	1.55488	1.10635	27.6868	7.13282	5.86597	38.0177	0	5.60378	47.6505	1.60462	1.14174	28.5725	7.36101	6.05364	39.2339
chr21:36358909:36359577	chr21	36358909	36359577	.	669	2.36648	4.83983	8.90452e-06	0.000708044	4.55645	25.7928	39.4397	8.55182	56.4236	36.2058	9.80763	21.3027	43.7464	6.81084	38.5542	58.9532	12.783	84.3402	54.1193	14.6601	31.8427	65.3907
chr11:13147747:13148673	chr11	13147747	13148673	.	927	3.87744	4.02958	8.9301e-06	0.000708127	7.29032	5.43006	30.7822	0	5.53173	25.557	0	6.79218	49.4751	7.86442	5.85767	33.2062	0	5.96734	27.5696	0	7.32705	53.3712
chr18:20871257:20872149	chr18	20871257	20872149	.	893	2.89272	4.48536	9.26697e-06	0.000732827	0.91129	20.3627	22.1247	8.55182	28.765	44.7248	2.67481	30.8735	28.6435	1.02048	22.8026	24.7757	9.5765	32.2116	50.0837	2.99531	34.5728	32.0756
chr16:27729818:27730372	chr16	27729818	27730372	.	555	4.77115	3.78417	9.34905e-06	0.000737298	0	10.8601	8.65749	1.55488	25.4459	21.2975	0	18.5241	22.9148	0	19.5678	15.5991	2.80158	45.8486	38.3739	0	33.3768	41.2879
chr14:69246207:69247211	chr14	69246207	69247211	.	1005	1.21926	6.48433	9.44237e-06	0.000740611	59.2339	114.031	96.1944	41.2042	82.9759	106.488	49.0381	100.648	142.176	58.9392	113.464	95.7158	40.9992	82.5631	105.958	48.7942	100.147	141.468
chr9:72500121:72501215	chr9	72500121	72501215	.	1095	3.25983	4.35494	9.856e-06	0.000770958	7.29032	17.6477	25.9725	1.55488	34.2967	33.0112	0	24.6988	26.5603	6.65783	16.1166	23.7192	1.41998	31.3212	30.1472	0	22.556	24.256
chr1:56046264:56047318	chr1	56046264	56047318	.	1055	1.97386	5.12491	9.91521e-06	0.000771409	20.0484	24.4353	66.3741	14.7713	32.084	40.4653	8.02442	31.7997	61.4533	19.0032	23.1614	62.9138	14.0013	30.4114	38.3557	7.60609	30.1419	58.2495
chr11:95888715:95890483	chr11	95888715	95890483	.	1769	2.86662	4.28041	9.97417e-06	0.00077391	8.20161	13.5752	42.3255	3.10975	16.5952	30.8814	2.67481	14.8193	29.6851	4.6363	7.67391	23.9262	1.75792	9.38111	17.457	1.51204	8.37722	16.7807
chr18:26734278:26735742	chr18	26734278	26735742	.	1465	0.995277	7.34639	1.00909e-05	0.000774638	78.3709	194.125	180.845	97.9572	257.779	155.472	95.4015	187.711	204.15	53.4955	132.508	123.444	66.865	175.958	106.124	65.1205	128.13	139.351
chr12:12971984:12973428	chr12	12971984	12973428	.	1445	1.32487	6.18722	1.00714e-05	0.000774638	49.2097	58.3732	139.482	52.0883	48.6792	118.201	42.7969	29.9473	105.2	34.0551	40.3967	96.5272	36.0473	33.688	81.8002	29.6172	20.7248	72.8025
chr10:52298469:52299455	chr10	52298469	52299455	.	987	2.51641	4.62542	1.00659e-05	0.000774638	2.73387	31.2229	31.7441	7.77438	43.1475	30.8814	5.34961	26.5512	30.7266	2.76988	31.6341	32.1622	7.87678	43.7158	31.2881	5.42008	26.901	31.1313
chr11:95979679:95980496	chr11	95979679	95980496	.	818	2.55805	4.5442	1.03593e-05	0.000788943	6.37903	14.9327	56.7547	6.99694	25.4459	41.5302	6.24122	19.7591	20.3108	7.79833	18.2551	69.3822	8.55372	31.1075	50.7704	7.62985	24.1553	24.8299
chr5:150997430:150998621	chr5	150997430	150998621	.	1192	1.58852	5.72994	1.03882e-05	0.000789065	20.9597	77.3784	56.7547	17.8811	48.6792	67.0872	32.0977	56.1898	87.4928	17.5836	64.9147	47.613	15.0009	40.8383	56.2812	26.9276	47.1391	73.4
chr9:116457536:116459480	chr9	116457536	116459480	.	1945	1.22335	6.47441	1.04743e-05	0.00079352	41.9193	103.171	110.624	43.5365	140.506	94.774	35.6641	137.079	79.6809	21.5524	53.0443	56.8758	22.3838	72.2395	48.727	18.3363	70.4774	40.9671
chr15:59568473:59569264	chr15	59568473	59569264	.	792	1.31498	6.19742	1.05826e-05	0.000799624	30.9839	63.8032	82.7271	48.2012	71.9125	99.0335	42.7969	84.5935	121.344	39.121	80.5596	104.453	60.86	90.7986	125.042	54.0365	106.81	153.212
chr5:17679742:17681307	chr5	17679742	17681307	.	1566	3.42852	4.9601	1.11934e-05	0.000832696	0	70.5908	12.5053	2.33231	65.2744	4.2595	0.891602	88.6071	20.3108	0	45.0771	7.98548	1.48934	41.6822	2.71999	0.56935	56.5818	12.9699
chr3:62904249:62905062	chr3	62904249	62905062	.	814	3.0385	4.83394	1.11715e-05	0.000832696	1.82258	73.3058	25.0105	0	68.5934	13.8434	5.34961	40.1356	19.79	2.23904	90.0563	30.7255	0	84.2671	17.0066	6.57201	49.3066	24.3121
chr12:52889478:52891110	chr12	52889478	52891110	.	1633	1.61362	5.66349	1.16198e-05	0.000859986	15.4919	62.4457	59.6405	20.2134	57.53	88.3847	28.5313	60.8209	51.0375	9.48679	38.2399	36.522	12.3781	35.2296	54.1241	17.4717	37.2449	31.2538
chr3:159583862:159584950	chr3	159583862	159584950	.	1089	2.31897	4.7624	1.17256e-05	0.000863385	4.55645	31.2229	44.2494	13.9939	30.9777	47.9194	6.24122	18.5241	35.4137	4.18407	28.6711	40.6331	12.8502	28.446	44.0031	5.73115	17.0102	32.5195
chr12:59434960:59436032	chr12	59434960	59436032	.	1073	1.79658	5.29611	1.19658e-05	0.000876603	19.1371	33.9379	68.298	16.3262	13.2761	59.6331	24.0733	26.5512	78.1186	17.8351	31.629	63.6514	15.2155	12.3729	55.576	22.4355	24.7449	72.8039
chr13:41790075:41791479	chr13	41790075	41791479	.	1405	2.3411	4.73991	1.20856e-05	0.000880907	18.2258	6.78758	58.6786	5.44207	8.85076	56.4384	8.02442	18.5241	45.3088	12.9721	4.83102	41.7641	3.87336	6.29948	40.1697	5.71133	13.1844	32.2482
chr4:86419116:86420026	chr4	86419116	86420026	.	911	1.96666	5.20031	1.23949e-05	0.00089891	18.2258	51.5856	41.3636	9.32925	45.3602	44.7248	6.24122	54.6462	45.8296	20.0064	56.6252	45.4046	10.2407	49.7916	49.0942	6.85095	59.9848	50.3069
chr5:173837422:173838800	chr5	173837422	173838800	.	1379	2.65165	5.12845	1.24546e-05	0.000900973	3.64516	74.6633	32.7061	7.77438	57.53	12.7785	0	82.1236	29.1643	2.64334	54.1431	23.7172	5.63769	41.7186	9.26651	0	59.553	21.1488
chr2:17861169:17862148	chr2	17861169	17862148	.	980	1.95031	5.10729	1.28756e-05	0.000924483	15.4919	50.2281	48.0972	10.8841	35.4031	38.3355	11.5908	28.4037	59.3701	15.8081	51.2531	49.0788	11.1063	36.1256	39.1179	11.8274	28.9833	60.5817
chr15:62898422:62899075	chr15	62898422	62899075	.	654	1.4729	5.78741	1.30749e-05	0.000934147	33.7177	59.7307	71.1838	20.9908	53.1046	72.4116	24.0733	73.1703	74.473	51.5562	91.3313	108.844	32.0961	81.1997	110.721	36.8093	111.881	113.873
chr1:22091237:22092063	chr1	22091237	22092063	.	827	1.8637	5.16896	1.31796e-05	0.000939298	12.7581	29.8653	46.1733	17.1036	27.6586	71.3467	15.1572	41.3705	48.4335	15.4269	36.1129	55.8323	20.6815	33.4445	86.2717	18.328	50.0248	58.5653
chr1:188206470:188207561	chr1	188206470	188207561	.	1092	1.31502	6.27447	1.3538e-05	0.000957749	45.5645	59.7307	133.71	56.753	44.2538	154.407	42.7969	68.848	78.1186	41.7257	54.6984	122.445	51.9716	40.5255	141.398	39.1913	63.0476	71.5371
chr10:71623087:71624842	chr10	71623087	71624842	.	1756	1.29679	6.19523	1.39439e-05	0.000979265	54.6774	54.3006	95.2324	31.875	51.9982	111.812	48.1465	74.714	121.865	31.1375	30.9229	54.2326	18.152	29.6118	63.6742	27.4183	42.5478	69.3992
chr1:173236395:173237117	chr1	173236395	173237117	.	723	4.29561	3.81378	1.41778e-05	0.000990868	0.91129	8.14509	15.3911	2.33231	3.31904	19.1678	0	22.2289	35.9345	1.26043	11.2657	21.2878	3.22588	4.59065	26.5114	0	30.7454	49.702
chr10:6790749:6791619	chr10	6790749	6791619	.	871	1.18471	6.35723	1.44227e-05	0.000998456	61.0564	50.2281	133.71	47.4237	75.2315	120.331	57.9542	54.6462	123.948	70.0992	57.6671	153.513	54.4474	86.3737	138.153	66.5375	62.7396	142.306
chr8:6456540:6457391	chr8	6456540	6457391	.	852	1.06963	6.60445	1.43464e-05	0.000998456	67.4355	65.1607	153.911	76.9664	65.2744	159.731	73.1114	56.8073	144.259	79.1496	76.4797	180.647	90.3361	76.6131	187.478	85.8115	66.6753	169.318
chr8:46854168:46854672	chr8	46854168	46854672	.	505	1.13715	7.32664	1.43691e-05	0.000998456	151.274	217.202	231.828	69.9694	113.954	197.002	86.4854	120.716	244.251	299.553	430.104	459.066	138.553	225.651	390.103	171.258	239.041	483.665
chr18:18512734:18514669	chr18	18512734	18514669	.	1936	0.926715	9.04976	1.46694e-05	0.00101296	482.072	715.411	599.291	331.966	403.816	560.125	272.83	490.272	900.447	249.004	369.53	309.551	171.47	208.583	289.321	140.925	253.24	465.107
chr4:122250839:122251688	chr4	122250839	122251688	.	850	4.80344	3.73001	1.47312e-05	0.0010148	0	24.4353	6.7336	1.55488	16.5952	17.038	0	10.497	29.6851	0	28.7474	7.92189	1.82927	19.5237	20.0447	0	12.3494	34.9236
chr12:127256781:127257540	chr12	127256781	127257540	.	760	0.977968	7.16017	1.55136e-05	0.00106362	95.6855	152.042	191.427	93.2925	155.995	202.326	81.1358	161.16	141.655	125.902	200.055	251.877	122.753	205.256	266.219	106.758	212.052	186.388
chr1:151996590:151997674	chr1	151996590	151997674	.	1085	3.5865	3.93498	1.57917e-05	0.00108012	2.73387	23.0778	31.7441	1.55488	18.8079	12.7785	0.891602	13.8931	20.3108	2.5197	21.2698	29.2573	1.43307	17.3344	11.7774	0.821753	12.8047	18.7197
chr4:139268999:139269969	chr4	139268999	139269969	.	971	2.08135	5.03837	1.58514e-05	0.00108164	10.9355	44.798	48.0972	5.44207	44.2538	23.4273	12.4824	43.5317	48.9543	11.2621	46.1359	49.5337	5.6046	45.5755	24.127	12.8552	44.8318	50.4164
chr10:123899831:123901467	chr10	123899831	123901467	.	1637	1.28301	6.2065	1.68669e-05	0.00113484	30.0726	81.4509	80.8033	45.8688	105.103	80.9306	35.6641	81.8149	109.366	18.3705	49.7562	49.3606	28.0201	64.2045	49.4383	21.7863	49.9785	66.8088
chr10:42387148:42388288	chr10	42387148	42388288	.	1141	0.94729	10.2534	1.69224e-05	0.00113592	1253.02	1779.7	1533.34	485.121	1023.37	1331.09	694.558	1053.71	1819.64	1098.18	1559.77	1343.85	425.172	896.906	1166.6	608.728	923.5	1594.78
chr6:133930454:133931555	chr6	133930454	133931555	.	1102	1.6215	5.67237	1.70777e-05	0.00114369	36.4516	57.0156	74.0697	24.878	17.7015	88.3847	19.6153	41.0618	86.4512	33.0777	51.7383	67.2138	22.5753	16.0631	80.2039	17.7997	37.2612	78.4494
chr4:49106551:49107933	chr4	49106551	49107933	.	1383	1.03339	7.64247	1.71988e-05	0.00114914	164.032	291.866	276.078	109.619	160.42	217.235	117.692	145.414	304.142	118.606	211.038	199.622	79.2616	115.994	157.075	85.0987	105.144	219.914
chr3:49298015:49299498	chr3	49298015	49299498	.	1484	1.46565	5.84738	1.73849e-05	0.00115091	33.7177	69.2333	66.3741	29.5426	78.5505	73.4764	15.1572	62.3646	77.077	22.7208	46.6532	44.7265	19.9074	52.9316	49.5124	10.2138	42.0246	51.9387
chr7:105417341:105418471	chr7	105417341	105418471	.	1131	1.41815	6.00006	1.78464e-05	0.00117339	40.0968	65.1607	77.9174	29.5426	76.3378	91.5793	18.7237	94.473	68.2235	35.4525	57.6134	68.8925	26.1208	67.4959	80.972	16.555	83.5305	60.3214
chr8:101524097:101524974	chr8	101524097	101524974	.	878	1.97878	5.15645	1.78455e-05	0.00117339	7.29032	61.0882	55.7927	12.439	25.4459	37.2707	17.832	36.122	55.2038	8.30333	69.5765	63.5452	14.1674	28.9817	42.4495	20.3099	41.1413	62.8745
chr19:34723674:34724588	chr19	34723674	34724588	.	915	1.53614	5.75673	1.79601e-05	0.00117818	33.7177	54.3006	63.4883	28.7652	48.6792	77.7359	13.374	72.5528	79.1601	36.85	59.3449	69.3861	31.4374	53.2013	84.9573	14.6164	79.2927	86.5138
chr4:124409848:124410729	chr4	124409848	124410729	.	882	1.82795	5.10578	1.85708e-05	0.00121548	18.2258	28.5078	51.9449	10.8841	32.084	58.5682	16.0488	30.5648	49.9959	20.6642	32.3218	58.8945	12.3403	36.3764	66.4038	18.196	34.654	56.6847
chr6:131964199:131964893	chr6	131964199	131964893	.	695	3.63377	3.88543	1.86632e-05	0.00121877	0	10.8601	25.9725	2.33231	7.74442	24.4921	3.56641	16.363	26.5603	0	15.6261	37.3705	3.35585	11.143	35.2405	5.13152	23.5439	38.2163
chr17:60901861:60902767	chr17	60901861	60902767	.	907	1.48642	5.90001	1.8909e-05	0.00123203	19.1371	71.9483	63.4883	32.6524	101.784	76.6711	16.0488	89.2245	53.6414	21.0993	79.3256	69.9981	36.0004	112.22	84.5326	17.6944	98.3732	59.1416
chr9:97567836:97568446	chr9	97567836	97568446	.	611	3.07452	4.08883	1.9161e-05	0.00124284	2.73387	12.2176	43.2875	7.77438	3.31904	31.9463	1.7832	4.63103	32.8098	4.47442	19.9961	70.8469	12.724	5.43214	52.2852	2.9185	7.57943	53.6985
chr18:9025129:9025987	chr18	9025129	9025987	.	859	1.3337	6.17138	1.97214e-05	0.00126779	29.1613	54.3006	119.281	42.7591	102.89	77.7359	39.2305	84.5935	84.8888	33.9479	63.2138	138.86	49.7777	119.779	90.4959	45.67	98.479	98.8228
chr4:91167849:91168842	chr4	91167849	91168842	.	994	4.61685	3.7087	1.96885e-05	0.00126779	0	17.6477	25.0105	0	13.2761	35.1409	2.67481	4.63103	10.9366	0	17.7542	25.1615	0	13.3563	35.353	2.69095	4.65898	11.0026
chr2:92305265:92310953	chr2	92305265	92310953	.	5689	0.829364	11.0411	1.99837e-05	0.00127662	2249.98	2734.04	2678.05	986.569	1681.65	2368.28	1383.77	1712.56	3157.55	395.496	480.583	470.742	173.417	295.596	416.292	243.236	301.029	555.028
chr4:37323583:37324216	chr4	37323583	37324216	.	634	1.97213	5.03634	2.00263e-05	0.00127662	12.7581	39.3679	40.4016	9.32925	18.8079	43.6599	15.1572	39.8269	60.9325	20.1231	62.0946	63.725	14.7149	29.6654	68.8642	23.9073	62.8184	96.108
chr8:46856053:46856950	chr8	46856053	46856950	.	898	1.02266	7.65631	2.00798e-05	0.00127662	185.903	270.146	257.801	96.4023	179.228	219.364	111.45	165.173	317.682	207.019	300.83	287.083	107.352	199.586	244.281	124.109	183.935	353.766
chr20:52517041:52517951	chr20	52517041	52517951	.	911	2.77405	4.41434	2.02613e-05	0.00128449	7.29032	31.2229	37.5158	4.66463	16.5952	31.9463	0.891602	28.4037	20.8316	8.00255	34.2732	41.1809	5.12034	18.2164	35.0673	0.978707	31.1785	22.8668
chr7:16308601:16309165	chr7	16308601	16309165	.	565	2.40213	4.99522	2.06549e-05	0.00130171	2.73387	23.0778	28.8583	7.77438	49.7856	75.6062	12.4824	52.1763	21.3524	4.83871	40.8456	51.0766	13.76	88.116	133.816	22.0928	92.3474	37.7919
chr12:13733404:13734585	chr12	13733404	13734585	.	1182	1.45736	5.92921	2.071e-05	0.00130234	24.6048	23.0778	131.786	43.5365	57.53	87.3198	41.0137	42.6055	83.3265	20.8163	19.5243	111.494	36.8329	48.6717	73.8746	34.6986	36.0453	70.4962
chr13:21607744:21609152	chr13	21607744	21609152	.	1409	2.73877	4.30778	2.16883e-05	0.00135245	1.82258	21.7202	33.668	4.66463	26.5523	26.6219	5.34961	23.7726	21.3524	1.29353	15.4154	23.895	3.31059	18.8448	18.8942	3.79675	16.872	15.1543
chr2:230680056:230681093	chr2	230680056	230681093	.	1038	2.78924	4.13127	2.17937e-05	0.00135572	5.46774	10.8601	36.5539	4.66463	4.42538	41.5302	5.34961	5.86597	30.7266	5.26757	10.4625	35.2157	4.49386	4.26337	40.0098	5.15377	5.65123	29.6018
chr4:83706142:83707971	chr4	83706142	83707971	.	1830	2.15933	4.96359	2.20724e-05	0.00136716	4.55645	4.07255	77.9174	16.3262	12.1698	38.3355	21.3985	16.363	73.4314	2.48986	2.22543	42.5778	8.92142	6.65016	20.9484	11.6931	8.94152	40.1265
chr8:123770476:123771627	chr8	123770476	123771627	.	1152	1.38197	6.32808	2.21424e-05	0.00136856	50.121	65.1607	75.9935	20.2134	110.635	140.564	52.6045	92.0032	102.596	43.5078	56.5631	65.9666	17.5463	96.0369	122.017	45.6637	79.8638	89.0588
chr9:72726172:72727118	chr9	72726172	72727118	.	947	4.37334	3.8434	2.30181e-05	0.00141361	0	13.5752	16.353	2.33231	8.85076	33.0112	0	30.2561	9.37423	0	14.3349	17.2683	2.46284	9.34611	34.8587	0	31.9494	9.89887
chr17:70334663:70336139	chr17	70334663	70336139	.	1477	0.82052	7.93767	2.29981e-05	0.00141361	199.573	249.783	307.822	152.378	220.163	290.711	177.429	260.573	334.347	135.12	169.115	208.41	103.167	149.061	196.825	120.128	176.42	226.369
chr1:186121258:186122593	chr1	186121258	186122593	.	1336	2.33721	4.90164	2.36568e-05	0.00144975	1.82258	28.5078	50.983	6.2195	25.4459	25.557	18.7237	37.9745	57.8077	1.36421	21.3382	38.1609	4.65532	19.0464	19.1295	14.0147	28.424	43.2693
chr11:88288061:88288828	chr11	88288061	88288828	.	768	1.27709	6.15474	2.42277e-05	0.00146914	38.2742	70.5908	87.5369	48.9786	55.3173	113.942	32.0977	90.1507	90.0967	49.8362	91.9151	113.98	63.7742	72.0277	148.362	41.7939	117.384	117.313
chr5:73233613:73235215	chr5	73233613	73235215	.	1603	1.58935	5.80078	2.47007e-05	0.00149155	32.8064	80.0934	50.983	20.9908	87.4013	67.0872	8.02442	74.0965	67.7027	20.4657	49.9647	31.8047	13.0947	54.5236	41.851	5.00588	46.2236	42.235
chr4:157694933:157695815	chr4	157694933	157695815	.	883	2.51094	4.45141	2.55997e-05	0.00154261	2.73387	16.2902	36.5539	8.55182	16.5952	23.4273	6.24122	28.4037	41.6632	3.09612	18.4487	41.3973	9.68496	18.7941	26.5314	7.0682	32.1672	47.1837
chr2:92319481:92320920	chr2	92319481	92320920	.	1440	0.889286	9.42826	2.5954e-05	0.00154461	650.661	936.686	919.618	303.978	521.089	764.581	506.43	568.691	1016.58	451.848	650.476	638.624	211.096	361.867	530.959	351.688	394.924	705.96
chr2:92321160:92326060	chr2	92321160	92326060	.	4901	0.85472	10.8502	2.56994e-05	0.00154461	2007.57	2424.52	2264.42	913.49	1324.3	2122.3	1127.88	1487.8	2928.92	409.625	494.7	462.031	186.388	270.209	433.034	230.132	303.57	597.618
chr10:42385993:42386485	chr10	42385993	42386485	.	493	0.981379	8.88669	2.59521e-05	0.00154461	494.831	631.245	612.758	193.582	466.878	501.557	239.841	395.181	711.92	1003.71	1280.42	1242.92	392.661	947.014	1017.36	486.493	801.585	1444.06
chr7:80411016:80411645	chr7	80411016	80411645	.	630	2.94561	4.22878	2.5875e-05	0.00154461	1.82258	8.14509	23.0866	3.88719	28.765	48.9843	6.24122	13.2756	22.9148	2.89298	12.9287	36.6455	6.17014	45.6587	77.7528	9.90669	21.0724	36.3727
chr12:15066383:15066793	chr12	15066383	15066793	.	411	4.20312	4.1648	2.61525e-05	0.00155025	0	50.2281	14.4292	1.55488	33.1904	3.19463	0	30.2561	17.1861	0	122.209	35.1074	3.78315	80.7552	7.77282	0	73.6157	41.8153
chr3:128143246:128143710	chr3	128143246	128143710	.	465	3.92259	3.7367	2.61562e-05	0.00155025	1.82258	2.71503	27.8964	3.88719	5.53173	51.114	0	1.85241	15.1029	3.91953	5.83878	59.9922	8.35955	11.8962	109.923	0	3.98368	32.4794
chr12:54767062:54768801	chr12	54767062	54768801	.	1740	1.14139	6.59135	2.76336e-05	0.00161461	65.6129	38.0104	133.71	62.195	94.0394	154.407	73.1114	77.4926	154.675	37.7086	21.8451	76.8449	35.7443	54.0456	88.7397	42.018	44.536	88.8935
chr16:85038035:85038787	chr16	85038035	85038787	.	753	2.92288	4.28863	2.80819e-05	0.00163749	6.37903	31.2229	11.5433	1.55488	24.3396	38.3355	2.67481	17.5979	30.7266	8.47149	41.4646	15.3298	2.06491	32.3235	50.9104	3.5522	23.3704	40.8056
chr2:54271281:54271664	chr2	54271281	54271664	.	384	2.28026	4.57391	2.82842e-05	0.0016451	11.8468	20.3627	31.7441	7.77438	12.1698	53.2438	5.34961	20.994	37.4969	30.851	53.0279	82.667	20.2458	31.6922	138.656	13.9313	54.6719	97.6482
chr11:28858068:28858799	chr11	28858068	28858799	.	732	5.56858	3.42302	2.83834e-05	0.0016451	0	6.78758	31.7441	0.777438	14.3825	12.7785	0	9.26206	8.85344	0	9.27265	43.3663	1.06207	19.6482	17.457	0	12.6531	12.0949
chr5:71434656:71435096	chr5	71434656	71435096	.	441	6.66383	3.68999	3.0849e-05	0.00176672	0	20.3627	2.88583	0	17.7015	19.1678	0	33.9609	6.24948	0	46.174	6.54383	0	40.1395	43.4643	0	77.0088	14.1712
chr10:21483277:21484235	chr10	21483277	21484235	.	959	1.72184	5.26935	3.13732e-05	0.00178259	15.4919	33.9379	83.6891	16.3262	42.0411	45.7897	22.2901	25.625	49.9959	16.1543	35.3888	87.267	17.0242	43.8385	47.7473	23.243	26.7206	52.1333
chr8:121755373:121755968	chr8	121755373	121755968	.	596	2.92883	4.35731	3.21622e-05	0.00181669	0	29.8653	27.8964	3.88719	29.8713	15.9731	4.45801	35.8133	22.394	0	50.1096	46.806	6.52213	50.1197	26.8006	7.47989	60.0894	37.5738
chr13:23277258:23278321	chr13	23277258	23278321	.	1064	2.13178	4.70824	3.21365e-05	0.00181669	7.29032	29.8653	49.0591	11.6616	15.4888	34.076	8.02442	29.0211	36.9761	6.8518	28.0689	46.1082	10.9601	14.5572	32.0263	7.54175	27.2755	34.752
chr8:127054627:127055839	chr8	127054627	127055839	.	1213	2.59247	4.60436	3.29461e-05	0.00185151	7.29032	44.798	41.3636	5.44207	32.084	38.3355	1.7832	27.1687	11.4574	6.01016	36.9316	34.1002	4.48645	26.4501	31.6039	1.47008	22.398	9.4455
chr9:66971219:66972274	chr9	66971219	66972274	.	1056	0.878417	8.75892	3.29711e-05	0.00185151	423.75	571.514	538.688	232.454	354.031	488.778	268.372	341.77	667.132	401.278	541.206	510.122	220.127	335.256	462.858	254.14	323.646	631.754
chr6:151446417:151448074	chr6	151446417	151448074	.	1658	0.943269	6.97336	3.3314e-05	0.00186713	88.3951	92.311	179.883	92.5151	110.635	158.667	100.751	92.3119	201.546	53.3143	55.6761	108.494	55.7992	66.7277	95.6975	60.7666	55.6766	121.56
chr4:157397322:157397953	chr4	157397322	157397953	.	632	1.67477	5.43411	3.37449e-05	0.0018731	14.5806	38.0104	56.7547	13.9939	86.295	46.8545	17.832	56.4986	45.3088	23.0706	60.1431	89.8017	22.1422	136.543	74.1369	28.2153	89.3965	71.6911
chr19:27732045:27734517	chr19	27732045	27734517	.	2473	0.727507	12.0348	3.36612e-05	0.0018731	4459.85	5320.1	5108.88	2172.94	3337.84	4491.65	3039.47	3411.22	6408.33	1803.42	2151.27	2065.86	878.665	1349.71	1816.27	1229.06	1379.38	2591.32
chr5:82577502:82578042	chr5	82577502	82578042	.	541	1.53521	5.56065	3.3572e-05	0.0018731	18.2258	65.1607	65.4122	29.5426	45.3602	53.2438	15.1572	54.3374	65.0988	33.6891	120.445	120.91	54.6075	83.845	98.4174	28.0171	100.439	120.33
chr1:36816356:36817510	chr1	36816356	36817510	.	1155	2.17555	4.7317	3.41657e-05	0.00188645	15.4919	23.0778	54.8308	4.66463	18.8079	25.557	8.91602	23.7726	49.4751	13.4129	19.9807	47.4725	4.03864	16.2839	22.1273	7.7195	20.5824	42.8356
chr10:4712811:4714785	chr10	4712811	4714785	.	1975	1.1042	6.51798	3.4857e-05	0.0019164	47.3871	88.2385	90.4227	62.195	123.911	125.655	45.4717	109.601	118.219	23.9935	44.6777	45.7836	31.4912	62.7396	63.623	23.0237	55.4942	59.8579
chr6:58778002:58779848	chr6	58778002	58779848	.	1847	0.854644	11.2929	3.50665e-05	0.00192426	2813.15	3222.74	3106.12	1201.92	1772.37	2868.78	1595.08	1826.17	4162.68	1523.09	1744.85	1681.71	650.741	959.592	1553.21	863.604	988.722	2253.75
chr5:73312176:73314340	chr5	73312176	73314340	.	2165	1.10325	6.52212	3.52453e-05	0.00193015	35.5403	107.244	103.89	56.753	99.5711	115.007	61.5206	121.333	112.491	16.4158	49.5352	47.9861	26.2138	45.9913	53.1208	28.416	56.043	51.9588
chr2:92314933:92319367	chr2	92314933	92319367	.	4435	0.851369	10.8949	3.55082e-05	0.00193015	2038.56	2545.34	2436.6	882.392	1361.91	2064.79	1250.03	1527.93	3016.94	459.652	573.921	549.403	198.961	307.083	465.568	281.855	344.517	680.257
chr11:9830128:9830936	chr11	9830128	9830936	.	809	2.07566	4.75183	3.54835e-05	0.00193015	6.37903	24.4353	39.4397	7.77438	29.8713	31.9463	12.4824	34.2696	41.1424	7.88508	30.2043	48.7512	9.60986	36.9238	39.4886	15.4295	42.3605	50.8559
chr12:13837274:13837877	chr12	13837274	13837877	.	604	3.30516	3.97418	3.53958e-05	0.00193015	3.64516	13.5752	16.353	3.88719	17.7015	27.6868	0	11.4232	33.3306	6.03503	22.4754	27.0746	6.43574	29.3072	45.839	0	18.9126	55.1831
chr7:83654678:83655234	chr7	83654678	83655234	.	557	1.55691	5.4229	3.65619e-05	0.00197997	17.3145	44.798	55.7927	20.9908	47.5729	66.0223	18.7237	53.72	47.9127	31.0853	80.4273	100.166	37.6855	85.4091	118.532	33.6152	96.4452	86.0192
chr6:119576469:119577154	chr6	119576469	119577154	.	686	5.25353	3.51487	3.70292e-05	0.00200152	0	17.6477	18.2769	0.777438	5.53173	10.6488	0	20.994	13.5405	0	25.7255	26.6428	1.13329	8.06374	15.523	0	30.6035	19.7384
chr5:93553688:93554944	chr5	93553688	93554944	.	1257	2.11306	4.61691	3.74462e-05	0.00201275	9.1129	23.0778	38.4777	10.8841	14.3825	45.7897	8.02442	19.4503	38.5385	7.24972	18.3594	30.6108	8.65882	11.4419	36.4277	6.38379	15.4736	30.6591
chr20:1755535:1756331	chr20	1755535	1756331	.	797	1.73042	5.46367	3.75395e-05	0.00201402	25.5161	38.0104	41.3636	16.3262	71.9125	56.4384	7.13282	61.7471	64.0572	32.0152	47.6919	51.8991	20.4846	90.2289	70.8136	8.94959	77.4744	80.3729
chr2:139273534:139274376	chr2	139273534	139274376	.	843	3.18247	4.21394	3.76375e-05	0.00201553	0	16.2902	12.5053	5.44207	28.765	37.2707	1.7832	29.3299	21.3524	0	19.3241	14.8342	6.45559	34.1222	44.2119	2.11531	34.7922	25.3291
chr17:63510165:63510791	chr17	63510165	63510791	.	627	4.4261	3.57185	3.78009e-05	0.00202053	0	4.07255	23.0866	3.10975	1.10635	19.1678	0	5.86597	34.3722	0	6.49529	36.8208	4.95973	1.76451	30.5706	0	9.35562	54.82
chr3:126630153:126630774	chr3	126630153	126630774	.	622	2.22055	4.78952	3.81782e-05	0.00203692	6.37903	35.2954	24.0486	11.6616	25.4459	57.5033	4.45801	43.5317	27.0811	10.2557	56.745	38.6633	18.7485	40.9099	92.449	7.16722	69.9866	43.5387
chr4:119260161:119260817	chr4	119260161	119260817	.	657	2.76033	4.50152	3.85107e-05	0.00205087	11.8468	31.2229	27.8964	0	16.5952	31.9463	4.45801	18.5241	47.9127	18.0316	47.5234	42.4602	0	25.259	48.6245	6.78541	28.195	72.9265
chr3:170872600:170873569	chr3	170872600	170873569	.	970	3.58453	3.8437	3.88448e-05	0.00206106	0	14.9327	20.2008	3.10975	9.95711	18.1029	1.7832	20.3765	24.9979	0	15.3945	20.8256	3.20593	10.2651	18.6628	1.83836	21.0067	25.7711
chr2:19386950:19387601	chr2	19386950	19387601	.	652	2.43037	4.63542	3.89643e-05	0.00206361	2.73387	42.083	21.1628	2.33231	50.8919	23.4273	8.02442	35.1958	26.0395	4.19305	64.5444	32.4582	3.57717	78.0551	35.9314	12.3074	53.9813	39.9379
chr3:124248735:124249653	chr3	124248735	124249653	.	919	1.60707	5.48998	4.03549e-05	0.00212944	10.9355	31.2229	77.9174	28.7652	54.2109	71.3467	25.8565	37.9745	53.6414	11.8993	33.9748	84.785	31.3005	58.989	77.6351	28.1354	41.3215	58.3693
chr3:133727493:133728703	chr3	133727493	133728703	.	1211	1.46604	5.69609	4.05112e-05	0.00213378	26.4274	63.8032	76.9555	25.6555	61.9554	48.9843	14.2656	76.2576	58.3285	21.8228	52.6864	63.5471	21.1853	51.1605	40.4495	11.78	62.9708	48.1656
chr1:224267254:224268465	chr1	224267254	224268465	.	1212	2.9435	4.10084	4.16072e-05	0.00218752	1.82258	24.4353	22.1247	3.88719	24.3396	19.1678	1.7832	24.3901	19.2692	1.50378	20.1611	18.2547	3.20725	20.0822	15.815	1.47129	20.1238	15.8987
chr3:170909635:170910730	chr3	170909635	170910730	.	1096	0.843166	7.60024	4.22109e-05	0.00221121	161.298	214.487	233.752	133.719	205.78	242.792	112.342	175.979	253.625	147.17	195.7	213.278	122.007	187.756	221.525	102.502	160.565	231.41
chr6:16539100:16540419	chr6	16539100	16540419	.	1320	1.04923	6.68447	4.30531e-05	0.00224717	50.121	123.534	109.662	48.9786	137.187	139.499	66.8702	140.783	96.3462	37.9704	93.5863	83.0769	37.105	103.929	105.681	50.6592	106.654	72.9896
chr4:114936598:114937371	chr4	114936598	114937371	.	774	2.74608	4.24163	4.34176e-05	0.00226211	6.37903	6.78758	27.8964	6.2195	17.7015	18.1029	1.7832	16.9804	51.0375	8.24164	8.76948	36.0418	8.03553	22.8702	23.3887	2.30388	21.9386	65.9399
chr11:69311712:69313154	chr11	69311712	69313154	.	1443	2.38048	4.35813	4.35382e-05	0.0022643	8.20161	13.5752	29.8202	5.44207	14.3825	28.7516	6.24122	17.9067	44.788	5.68372	9.40759	20.6655	3.77136	9.96708	19.9249	4.32517	12.4093	31.0381
chr14:89453705:89454335	chr14	89453705	89454335	.	631	2.17257	4.60506	4.40637e-05	0.00228467	12.7581	24.4353	42.3255	7.77438	14.3825	41.5302	5.34961	23.4639	33.8514	20.2188	38.7247	67.0769	12.3207	22.7932	65.8164	8.47799	37.1852	53.6472
chr15:20004333:20005192	chr15	20004333	20005192	.	860	1.3089	6.06536	4.41415e-05	0.00228467	64.7016	57.0156	108.7	24.878	43.1475	100.098	34.7725	58.0423	97.9086	75.2344	66.2973	126.395	28.9279	50.1715	116.393	40.4331	67.491	113.847
chr2:191701747:191703821	chr2	191701747	191703821	.	2075	1.4461	5.84758	4.44258e-05	0.00229393	26.4274	48.8706	90.4227	15.5488	65.2744	68.1521	49.9297	50.6326	89.5759	12.7361	23.5521	43.5772	7.49338	31.4575	32.8444	24.0625	24.4013	43.1691
chr3:170975397:170976589	chr3	170975397	170976589	.	1193	1.2713	6.00677	4.45468e-05	0.00229607	34.629	71.9483	86.5749	48.9786	55.3173	99.0335	25.8565	62.3646	81.2433	29.0268	60.3087	72.5691	41.055	46.3682	83.0121	21.6735	52.2754	68.1
chr2:92311729:92314043	chr2	92311729	92314043	.	2315	0.868026	9.96683	4.59602e-05	0.00234827	1096.28	1267.92	1377.5	457.911	765.591	1115.99	655.328	724.602	1533.21	473.556	547.697	595.034	197.802	330.709	482.069	283.079	313.003	662.292
chr13:22809307:22810413	chr13	22809307	22810413	.	1107	7.47413	3.20602	4.61295e-05	0.00234829	0	8.14509	6.7336	0	9.95711	31.9463	0	5.2485	10.4158	0	7.35781	6.08275	0	8.99468	28.8584	0	4.74119	9.40904
chr1:171885045:171886269	chr1	171885045	171886269	.	1225	2.21567	4.71298	4.60936e-05	0.00234829	2.73387	33.9379	49.0591	13.9939	26.5523	24.4921	8.02442	20.6853	43.7464	2.23173	27.7044	40.0483	11.4236	21.6753	19.9936	6.55055	16.8859	35.7113
chr5:148293314:148294153	chr5	148293314	148294153	.	840	1.98228	4.8923	4.65469e-05	0.00236537	8.20161	36.6529	49.0591	10.8841	17.7015	62.8277	17.832	17.5979	35.9345	9.76382	43.6344	58.4037	12.9573	21.0732	74.7949	21.2286	20.9499	42.7792
chr13:74295799:74297059	chr13	74295799	74297059	.	1261	3.04297	4.01484	4.81067e-05	0.0024233	3.64516	20.3627	26.9344	3.88719	19.9142	30.8814	0.891602	13.2756	15.1029	2.89069	16.1481	21.3596	3.08262	15.7924	24.4896	0.70706	10.5279	11.9769
chr7:61967582:61968430	chr7	61967582	61968430	.	849	0.790116	9.44932	4.91993e-05	0.00246543	678.911	830.799	843.624	342.85	575.3	797.592	557.252	569.308	1083.24	799.66	978.562	993.668	403.828	677.62	939.449	656.362	670.563	1275.91
chr2:92295791:92298219	chr2	92295791	92298219	.	2429	0.903444	9.77816	4.97381e-05	0.00248381	968.701	1137.6	1096.62	437.698	586.363	1002.05	517.129	651.432	1492.06	398.807	468.34	451.468	180.197	241.401	412.535	212.898	268.189	614.271
chr6:152407965:152408898	chr6	152407965	152408898	.	934	2.64693	4.58987	4.99095e-05	0.00248806	3.64516	39.3679	18.2769	6.2195	45.3602	26.6219	0	43.8404	20.3108	3.90274	42.1498	19.5684	6.659	48.5655	28.5031	0	46.9384	21.7461
chr4:37322352:37323446	chr4	37322352	37323446	.	1095	2.9865	4.12236	5.02199e-05	0.0024983	0	17.6477	22.1247	4.66463	17.7015	24.4921	4.45801	22.2289	28.6435	0	16.1166	20.2052	4.25993	16.1658	22.3673	4.07124	20.3004	26.1584
chr6:106044216:106044519	chr6	106044216	106044519	.	304	3.15765	3.97227	5.0288e-05	0.0024983	2.73387	8.14509	26.9344	2.33231	29.8713	29.8165	2.67481	12.3494	15.1029	8.99299	26.7931	88.6001	7.67208	98.261	98.0807	8.79871	40.6231	49.6807
chrY:13483656:13485002	chrY	13483656	13485002	.	1347	0.863767	7.36307	5.12852e-05	0.00254347	97.508	247.068	155.835	87.8505	210.206	158.667	95.4015	221.981	194.255	72.389	183.421	115.69	65.2194	156.055	117.793	70.8251	164.796	144.213
chr2:6696704:6697904	chr2	6696704	6697904	.	1201	1.75681	5.15624	5.14627e-05	0.00254353	11.8468	54.3006	41.3636	13.9939	29.8713	40.4653	11.5908	57.7335	45.3088	9.86409	45.2128	34.4409	11.6519	24.872	33.693	9.65098	48.0712	37.7259
chr5:16803902:16804579	chr5	16803902	16804579	.	678	1.5751	5.39289	5.17615e-05	0.00254667	20.0484	47.513	59.6405	14.7713	57.53	36.2058	17.832	50.9413	59.8909	29.5699	70.0782	87.9653	21.7866	84.8525	53.4009	26.301	75.1347	88.3346
chr2:92289986:92291445	chr2	92289986	92291445	.	1460	0.94042	9.48203	5.24274e-05	0.00256485	757.282	947.546	919.618	310.198	452.495	795.462	468.091	548.623	1223.86	518.686	649.004	629.875	212.464	309.928	544.837	320.61	375.769	838.258
chr7:16168701:16170024	chr7	16168701	16170024	.	1324	2.01009	4.86548	5.49691e-05	0.00268011	5.46774	36.6529	29.8202	13.9939	30.9777	29.8165	7.13282	44.4579	48.4335	4.12971	27.6835	22.5228	10.5694	23.397	22.52	5.38733	33.5785	36.5812
chr17:2715192:2716167	chr17	2715192	2716167	.	976	1.5877	5.59076	5.49087e-05	0.00268011	26.4274	12.2176	76.9555	29.5426	60.849	89.4496	21.3985	35.1958	68.2235	27.0773	12.5181	78.8478	30.2691	62.3453	91.6492	21.9247	36.0613	69.9012
chr17:70605379:70606295	chr17	70605379	70606295	.	917	1.62008	5.60832	5.5254e-05	0.00268674	10.9355	29.8653	100.042	22.5457	19.9142	60.6979	49.0381	38.5919	92.1799	11.9253	32.5685	109.097	24.5864	21.7167	66.1919	53.4767	42.085	100.523
chr9:33506224:33507466	chr9	33506224	33507466	.	1243	2.03612	4.99934	5.52911e-05	0.00268674	27.3387	19.0052	55.7927	10.1067	7.74442	66.0223	5.34961	28.4037	53.6414	21.9941	15.2898	44.8855	8.13089	6.23043	53.1153	4.30379	22.8509	43.1548
chr13:41713456:41713953	chr13	41713456	41713953	.	498	2.77907	4.19723	5.62843e-05	0.0027304	2.73387	9.50261	38.4777	3.10975	13.2761	10.6488	8.91602	10.497	51.5582	5.4897	19.0815	77.2645	6.24448	26.6589	21.3831	17.9037	21.0783	103.531
chr3:171506065:171506675	chr3	171506065	171506675	.	611	3.55351	3.83886	5.65094e-05	0.00273672	0	20.3627	20.2008	3.88719	14.3825	27.6868	0.891602	15.128	14.5821	0	33.3269	33.0619	6.36201	23.5393	45.3139	1.45925	24.7595	23.866
chr9:22147724:22148638	chr9	22147724	22148638	.	915	1.18462	6.29502	5.69453e-05	0.00274861	38.2742	116.746	54.8308	32.6524	131.655	96.9037	34.7725	100.956	88.0136	41.8297	127.592	59.9243	35.6857	143.885	105.906	38.0027	110.335	96.1897
chr8:90190124:90191082	chr8	90190124	90191082	.	959	2.46341	4.32583	5.77923e-05	0.0027802	11.8468	8.14509	37.5158	4.66463	6.63807	51.114	4.45801	14.8193	28.1227	12.3533	8.49332	39.1197	4.86405	6.92187	53.2993	4.64861	15.4529	29.325
chr14:71488149:71489512	chr14	71488149	71489512	.	1364	1.13816	6.30589	5.88831e-05	0.00282796	59.2339	67.8758	114.471	36.5396	100.677	106.488	46.3633	75.6402	92.1799	43.4266	49.7623	83.9232	26.7885	73.8104	78.0701	33.9907	55.4547	67.5806
chr2:31607280:31608168	chr2	31607280	31608168	.	889	1.03665	7.01203	5.90556e-05	0.00282854	90.2177	162.902	144.292	75.4115	195.823	118.201	37.4473	171.039	153.112	101.482	183.242	162.308	84.8273	220.274	132.96	42.123	192.395	172.23
chr21:32688491:32689604	chr21	32688491	32689604	.	1114	1.00356	6.8853	6.02832e-05	0.00287484	78.3709	88.2385	151.025	65.3048	127.23	122.461	81.1358	159.925	174.465	70.3509	79.2087	135.57	58.6219	114.21	109.929	72.8329	143.559	156.611
chr12:63126504:63127163	chr12	63126504	63127163	.	660	1.73053	5.21692	6.19929e-05	0.00293949	10.9355	27.1503	37.5158	15.5488	64.168	54.3087	14.2656	51.8675	44.788	16.5689	41.1368	56.8421	23.5587	97.2243	82.2859	21.6146	78.5872	67.8606
chr5:151073528:151074154	chr5	151073528	151074154	.	627	5.73245	3.32508	6.20201e-05	0.00293949	0	0	13.4672	0.777438	4.42538	27.6868	0	10.1883	18.2277	0	0	21.4788	1.23993	7.05803	44.1575	0	16.2492	29.0712
chr2:186994914:186995547	chr2	186994914	186995547	.	634	2.04852	4.85544	6.22428e-05	0.00294521	2.73387	20.3627	48.0972	11.6616	23.2333	38.3355	17.832	34.8871	47.9127	4.3121	32.1179	75.8631	18.3936	36.6455	60.4661	28.1263	55.027	75.5721
chr17:46271117:46272092	chr17	46271117	46272092	.	976	1.20276	6.16099	6.2778e-05	0.00295777	55.5887	19.0052	105.814	54.4207	33.1904	127.785	49.0381	51.2501	132.281	56.9556	19.4726	108.416	55.7589	34.0065	130.927	50.244	52.5103	135.534
chr17:17929047:17929347	chr17	17929047	17929347	.	301	4.83557	3.43426	6.27369e-05	0.00295777	0	17.6477	23.0866	0.777438	2.21269	15.9731	0.891602	7.40965	17.1861	0	58.6302	76.6998	2.58285	7.35113	53.0669	2.96213	24.6168	57.0966
chr10:42391461:42392065	chr10	42391461	42392065	.	605	0.923018	9.26716	6.29183e-05	0.00295777	617.855	860.665	725.305	213.795	534.365	673.002	409.246	552.019	946.797	1021.25	1422.59	1198.85	353.381	883.248	1112.4	676.439	912.428	1564.95
chr8:22193458:22194045	chr8	22193458	22194045	.	588	2.59874	4.29081	6.46984e-05	0.00303651	1.82258	9.50261	52.9069	7.77438	1.10635	42.595	10.6992	7.10091	30.2058	3.09963	16.1609	89.9777	13.2217	1.88154	72.4405	18.196	12.0764	51.3705
[truncated: 177 more rows]

## Sheet: Hct116 Jun decreased Fbw7-Arg
Geneid	Chr	Start	End	Strand	Length	R_vs_WT.logFC	R_vs_WT.logCPM	R_vs_WT.PValue	R_vs_WT.FDR	CPM.TMMnormalized.Sample_DJ_HsSc_10WJ_1019	CPM.TMMnormalized.Sample_DJ_HsSc_11NJ_1019	CPM.TMMnormalized.Sample_DJ_HsSc_12RJ_1019	CPM.TMMnormalized.Sample_DJ_HsSc_13WJ_1019	CPM.TMMnormalized.Sample_DJ_HsSc_14NJ_1019	CPM.TMMnormalized.Sample_DJ_HsSc_15RJ_1019	CPM.TMMnormalized.Sample_DJ_HsSc_16WJ_1019	CPM.TMMnormalized.Sample_DJ_HsSc_17NJ_1019	CPM.TMMnormalized.Sample_DJ_HsSc_18RJ_1019	FPKM.TMMnormalized.Sample_DJ_HsSc_10WJ_1019	FPKM.TMMnormalized.Sample_DJ_HsSc_11NJ_1019	FPKM.TMMnormalized.Sample_DJ_HsSc_12RJ_1019	FPKM.TMMnormalized.Sample_DJ_HsSc_13WJ_1019	FPKM.TMMnormalized.Sample_DJ_HsSc_14NJ_1019	FPKM.TMMnormalized.Sample_DJ_HsSc_15RJ_1019	FPKM.TMMnormalized.Sample_DJ_HsSc_16WJ_1019	FPKM.TMMnormalized.Sample_DJ_HsSc_17NJ_1019	FPKM.TMMnormalized.Sample_DJ_HsSc_18RJ_1019
[truncated: 420 more rows]

[truncated: 4 more sheets: Hct116 Myc increased Fbw7-Del, Hct116 Myc decreased Fbw7-Del, Hct116 Myc increased Fbw7-Arg, Hct116 Myc decreased Fbw7-Arg]
