# Supplementary material for: Global and context-specific transcriptional consequences of oncogenic Fbw7 mutations
Source: eLife. 2022 Feb 28;11:e74338. doi: 10.7554/eLife.74338 (PMC8926403; doi:10.7554/eLife.74338)
Supplement: Figure 5—source data 2. — This Excel file includes the CIITA expression counts for WT and Fbw7-mutant Colorectal tumors. WT, wild-type. [file elife-74338-fig5-data2.xlsx]

## Sheet: Fbw7_Mutant
	sample	Mutation_Type	chr	start	end	gene	reference	alt	altGene	effect	aminoAcid	rnaVaf	dnaVaf	X	X.1	X.2	X.3	X.4	X.5	X.6	X.7	X.8	X.9	X.10	X.11	X.12	X.13	X.14	X.15	X.16	X.17	X.18	X.19	X.20	X.21	X.22	X.23	CIITA expression
	TCGA-AZ-6601-01	Het_Del	chr4	153332916	153332916	FBXW7	G	A		Nonsense_Mutation	p.R14*		0.18			NA	NA				NA			NA	NA			NA	NA				NA			NA	NA	9.134
	TCGA-D5-6898-01	Het_Del	chr4	153332916	153332916	FBXW7	G	A		Nonsense_Mutation	p.R14*		0.64			NA	NA				NA			NA	NA			NA	NA				NA			NA	NA	7.596
	TCGA-CA-6717-01	Het_Del and Missense	chr4	153244185	153244185	FBXW7	G	A		Nonsense_Mutation	p.R658*		0.15	TCGA-CA-6717-01	chr4	153250882	153250882	FBXW7	C	T	NA	Missense_Mutation	p.R393Q	NA	0.22	TCGA-CA-6717-01	chr4	153332915	153332915	FBXW7	C	T	NA	Missense_Mutation	p.R14Q	NA	0.25	8.712
	TCGA-AA-3984-01	Missense	chr4	153247244	153247244	FBXW7	C	A		Missense_Mutation	p.D520Y		0.27	TCGA-AA-3984-01	chr4	153332456	153332456	FBXW7	T	G	NA	Missense_Mutation	p.K167T	NA	0.27	TCGA-AA-3984-01	chr4	153332915	153332915	FBXW7	C	T	NA	Missense_Mutation	p.R14Q	NA	0.34	NA
	TCGA-CM-4750-01	Homo_Del	chr4	153251907	153251907	FBXW7	G	A		Nonsense_Mutation	p.R367*		0.26	TCGA-CM-4750-01	chr4	153332841	153332847	FBXW7	CCTCTAC	-	NA	Frame_Shift_Del	p.V37Rfs*24	NA	0.37			NA	NA				NA			NA	NA	NA
	TCGA-EI-6917-01	Homo_Del	chr4	153258970	153258970	FBXW7	G	T		Nonsense_Mutation	p.S282*		0.18	TCGA-EI-6917-01	chr4	153332667	153332667	FBXW7	C	A	NA	Nonsense_Mutation	p.E97*	NA	0.24			NA	NA				NA			NA	NA	10.24
	TCGA-AY-A54L-01	Missense	chr4	153244199	153244199	FBXW7	G	A		Missense_Mutation	p.T653M		0.21	TCGA-AY-A54L-01	chr4	153303444	153303444	FBXW7	G	A	NA	Intron		NA	0.14			NA	NA				NA			NA	NA	2.606
	TCGA-AF-5654-01	Homo_Del	chr4	153251901	153251901	FBXW7	C	A		Nonsense_Mutation	p.E369*		0.43	TCGA-AF-5654-01	chr4	153271206	153271206	FBXW7	G	C	NA	Nonsense_Mutation	p.S191*	NA	0.27			NA	NA				NA			NA	NA	5.206
	TCGA-CK-4948-01	Het_Del	chr4	153271206	153271206	FBXW7	G	C		Nonsense_Mutation	p.S191*		0.36			NA	NA				NA			NA	NA			NA	NA				NA			NA	NA	7.801
	TCGA-AD-6964-01	Missense	chr4	153268222	153268222	FBXW7	T	A		Missense_Mutation	p.T196S		0.12			NA	NA				NA			NA	NA			NA	NA				NA			NA	NA	10.92
	TCGA-QG-A5YW-01	Het_Del and Missense	chr4	153249385	153249385	FBXW7	G	A		Missense_Mutation	p.R465C		0.35	TCGA-QG-A5YW-01	chr4	153268138	153268138	FBXW7	G	A	NA	Nonsense_Mutation	p.R224*	NA	0.34			NA	NA				NA			NA	NA	8.229
	TCGA-AH-6903-01	Het_Del	chr4	153268138	153268138	FBXW7	G	A		Nonsense_Mutation	p.R224*		0.22			NA	NA				NA			NA	NA			NA	NA				NA			NA	NA	6.278
	TCGA-CI-6619-01	Het_Del	chr4	153258991	153258995	FBXW7	TGGGG	-		Frame_Shift_Del	p.P274Vfs*11		0.25			NA	NA				NA			NA	NA			NA	NA				NA			NA	NA	7.816
	TCGA-CA-6718-01	Missense	chr4	153258980	153258980	FBXW7	C	A		Missense_Mutation	p.D279Y		0.32			NA	NA				NA			NA	NA			NA	NA				NA			NA	NA	11.15
	TCGA-5M-AAT4-01	Het_Del and Missense	chr4	153244092	153244092	FBXW7	G	A		Missense_Mutation	p.R689W		0.37	TCGA-5M-AAT4-01	chr4	153245446	153245446	FBXW7	G	A	NA	Missense_Mutation	p.S582L	NA	0.24	TCGA-5M-AAT4-01	chr4	153253820	153253821	FBXW7	-	TGCT	NA	Frame_Shift_Ins	p.A305Sfs*13	NA	0.33	4.493
	TCGA-AY-6386-01	Het_Del	chr4	153251907	153251907	FBXW7	G	A		Nonsense_Mutation	p.R367*		0.04			NA	NA				NA			NA	NA			NA	NA				NA			NA	NA	6.794
	TCGA-AG-3725-01	Het_Del	chr4	153251907	153251907	FBXW7	G	A		Nonsense_Mutation	p.R367*		0.46			NA	NA				NA			NA	NA			NA	NA				NA			NA	NA	7.552
	TCGA-AH-6897-01	Het_Del	chr4	153251907	153251907	FBXW7	G	A		Nonsense_Mutation	p.R367*		0.93			NA	NA				NA			NA	NA			NA	NA				NA			NA	NA	5.31
	TCGA-AD-6548-01	Het_Del	chr4	153251895	153251895	FBXW7	T	A		Nonsense_Mutation	p.K371*		0.2			NA	NA				NA			NA	NA			NA	NA				NA			NA	NA	8.08
	TCGA-D5-6531-01	Het_Del and Missense	chr4	153245446	153245446	FBXW7	G	A		Missense_Mutation	p.S582L		0.41	TCGA-D5-6531-01	chr4	153250898	153250899	FBXW7	-	T	NA	Frame_Shift_Ins	p.Q388Tfs*5	NA	0.28			NA	NA				NA			NA	NA	7.972
	TCGA-DM-A0XD-01	Het_Del and Missense	chr4	153249465	153249465	FBXW7	G	A		Missense_Mutation	p.S438F		0.37	TCGA-DM-A0XD-01	chr4	153250848	153250848	FBXW7	T	-	NA	Frame_Shift_Del	p.V405Ffs*10	NA	0.2			NA	NA				NA			NA	NA	6.716
	TCGA-CM-4744-01	Het_Del	chr4	153249518	153249519	FBXW7	-	TGTCCCAC		Frame_Shift_Ins	p.H420Qfs*13		0.36			NA	NA				NA			NA	NA			NA	NA				NA			NA	NA	9.023
	TCGA-DC-5869-01	Missense	chr4	153245453	153245453	FBXW7	G	A		Missense_Mutation	p.H580Y		0.32	TCGA-DC-5869-01	chr4	153249451	153249451	FBXW7	G	A	NA	Missense_Mutation	p.L443F	NA	0.34			NA	NA				NA			NA	NA	5.1
	TCGA-D5-6928-01	Missense	chr4	153249385	153249385	FBXW7	G	A		Missense_Mutation	p.R465C		0.14			NA	NA				NA			NA	NA			NA	NA				NA			NA	NA	12.22
	TCGA-DC-6682-01	Missense	chr4	153249385	153249385	FBXW7	G	A		Missense_Mutation	p.R465C		0.68			NA	NA				NA			NA	NA			NA	NA				NA			NA	NA	7.278
	TCGA-D5-6931-01	Missense	chr4	153249385	153249385	FBXW7	G	A		Missense_Mutation	p.R465C		0.22			NA	NA				NA			NA	NA			NA	NA				NA			NA	NA	7.622
	TCGA-DM-A1HB-01	Missense	chr4	153249385	153249385	FBXW7	G	A		Missense_Mutation	p.R465C		0.31			NA	NA				NA			NA	NA			NA	NA				NA			NA	NA	8.082
	TCGA-A6-5661-01	Missense	chr4	153249385	153249385	FBXW7	G	A		Missense_Mutation	p.R465C		0.07			NA	NA				NA			NA	NA			NA	NA				NA			NA	NA	8.088
	TCGA-5M-AAT5-01	Missense	chr4	153249384	153249384	FBXW7	C	T		Missense_Mutation	p.R465H		0.56			NA	NA				NA			NA	NA			NA	NA				NA			NA	NA	6.233
	TCGA-NH-A6GB-01	Missense	chr4	153249384	153249384	FBXW7	C	T		Missense_Mutation	p.R465H		0.26			NA	NA				NA			NA	NA			NA	NA				NA			NA	NA	8.772
	TCGA-EF-5830-01	Missense	chr4	153249384	153249384	FBXW7	C	T		Missense_Mutation	p.R465H		0.5			NA	NA				NA			NA	NA			NA	NA				NA			NA	NA	4.714
	TCGA-F5-6814-01	Missense	chr4	153249384	153249384	FBXW7	C	T		Missense_Mutation	p.R465H		0.39			NA	NA				NA			NA	NA			NA	NA				NA			NA	NA	8.057
	TCGA-NH-A50T-01	Missense	chr4	153249384	153249384	FBXW7	C	T		Missense_Mutation	p.R465H		0.83			NA	NA				NA			NA	NA			NA	NA				NA			NA	NA	6.321
	TCGA-AM-5821-01	Missense	chr4	153249384	153249384	FBXW7	C	T		Missense_Mutation	p.R465H		0.37			NA	NA				NA			NA	NA			NA	NA				NA			NA	NA	9.577
	TCGA-AA-A01R-01	Missense	chr4	153249384	153249384	FBXW7	C	T		Missense_Mutation	p.R465H		0.61			NA	NA				NA			NA	NA			NA	NA				NA			NA	NA	NA
	TCGA-EI-6507-01	Het_Del	chr4	153249360	153249361	FBXW7	-	T		Frame_Shift_Ins	p.R473Kfs*4		0.21			NA	NA				NA			NA	NA			NA	NA				NA			NA	NA	7.667
	TCGA-AF-2687-01	Het_Del	chr4	153247367	153247367	FBXW7	G	A		Nonsense_Mutation	p.R479*		0.67			NA	NA				NA			NA	NA			NA	NA				NA			NA	NA	7.517
	TCGA-G4-6293-01	Missense	chr4	153247367	153247367	FBXW7	G	C		Missense_Mutation	p.R479G		0.24			NA	NA				NA			NA	NA			NA	NA				NA			NA	NA	8.627
	TCGA-A6-6137-01	Het_Del	chr4	153247367	153247367	FBXW7	G	A		Nonsense_Mutation	p.R479*		0.21			NA	NA				NA			NA	NA			NA	NA				NA			NA	NA	8.439
	TCGA-CI-6620-01	Het_Del	chr4	153247327	153247327	FBXW7	T	-		Frame_Shift_Del	p.Q492Rfs*6		0.31			NA	NA				NA			NA	NA			NA	NA				NA			NA	NA	6.865
	TCGA-WS-AB45-01	Missense	chr4	153247289	153247289	FBXW7	G	A		Missense_Mutation	p.R505C		0.12			NA	NA				NA			NA	NA			NA	NA				NA			NA	NA	8.866
	TCGA-D5-6927-01	Missense	chr4	153247289	153247289	FBXW7	G	A		Missense_Mutation	p.R505C		0.28			NA	NA				NA			NA	NA			NA	NA				NA			NA	NA	10.66
	TCGA-A6-2677-01	Missense	chr4	153247289	153247289	FBXW7	G	C		Missense_Mutation	p.R505G		0.5			NA	NA				NA			NA	NA			NA	NA				NA			NA	NA	NA
	TCGA-A6-3809-01	Missense	chr4	153247289	153247289	FBXW7	G	A		Missense_Mutation	p.R505C		0.26			NA	NA				NA			NA	NA			NA	NA				NA			NA	NA	NA
	TCGA-DM-A28G-01	Missense	chr4	153247288	153247288	FBXW7	C	T		Missense_Mutation	p.R505H		0.34			NA	NA				NA			NA	NA			NA	NA				NA			NA	NA	5.508
	TCGA-CM-6677-01	Missense	chr4	153247265	153247265	FBXW7	T	A		Missense_Mutation	p.R513W		0.62			NA	NA				NA			NA	NA			NA	NA				NA			NA	NA	6.859
	TCGA-G4-6302-01	Missense	chr4	153247196	153247196	FBXW7	T	G		Missense_Mutation	p.T536P		0.12			NA	NA				NA			NA	NA			NA	NA				NA			NA	NA	8.882
	TCGA-AH-6549-01	Missense	chr4	153245494	153245494	FBXW7	C	A		Missense_Mutation	p.W566L		0.79			NA	NA				NA			NA	NA			NA	NA				NA			NA	NA	6.903
	TCGA-CK-6746-01	Missense	chr4	153245461	153245461	FBXW7	A	G		Missense_Mutation	p.L577S		0.84			NA	NA				NA			NA	NA			NA	NA				NA			NA	NA	9.487
	TCGA-AG-3742-01	Missense	chr4	153245446	153245446	FBXW7	G	A		Missense_Mutation	p.S582L		0.69			NA	NA				NA			NA	NA			NA	NA				NA			NA	NA	5.442
	TCGA-G4-6628-01	Het_Del	chr4	153244294	153244295	FBXW7	-	T		Frame_Shift_Ins	p.N621Kfs*23		0.16			NA	NA				NA			NA	NA			NA	NA				NA			NA	NA	12.16
	TCGA-AA-3713-01	Missense	chr4	153244280	153244280	FBXW7	G	T		Missense_Mutation	p.A626D		0.63			NA	NA				NA			NA	NA			NA	NA				NA			NA	NA	8.749
	TCGA-CL-5918-01	Het_Del	chr4	153244185	153244185	FBXW7	G	A		Nonsense_Mutation	p.R658*		0.34			NA	NA				NA			NA	NA			NA	NA				NA			NA	NA	6.888
	TCGA-NH-A6GC-01	Het_Del	chr4	153244185	153244185	FBXW7	G	A		Nonsense_Mutation	p.R658*		0.37			NA	NA				NA			NA	NA			NA	NA				NA			NA	NA	4.791
	TCGA-A6-2686-01	Missense	chr4	153244184	153244184	FBXW7	C	T		Missense_Mutation	p.R658Q		0.4			NA	NA				NA			NA	NA			NA	NA				NA			NA	NA	8.103
	TCGA-AA-A022-01	Missense	chr4	153244184	153244184	FBXW7	C	T		Missense_Mutation	p.R658Q		0.25			NA	NA				NA			NA	NA			NA	NA				NA			NA	NA	NA
	TCGA-QG-A5YX-01	Het_Del	chr4	153244178	153244178	FBXW7	A	-		Frame_Shift_Del	p.L660Qfs*47		0.32			NA	NA				NA			NA	NA			NA	NA				NA			NA	NA	7.184
	TCGA-G4-6309-01	Het_Del	chr4	153244156	153244156	FBXW7	C	-		Frame_Shift_Del	p.S668Vfs*39		0.29			NA	NA				NA			NA	NA			NA	NA				NA			NA	NA	6.578
	TCGA-D5-6530-01	Het_Del	chr4	153244156	153244156	FBXW7	C	-		Frame_Shift_Del	p.S668Vfs*39		0.29			NA	NA				NA			NA	NA			NA	NA				NA			NA	NA	10.33
	TCGA-A6-5657-01	Missense	chr4	153244092	153244092	FBXW7	G	A		Missense_Mutation	p.R689W		0.2			NA	NA				NA			NA	NA			NA	NA				NA			NA	NA	8.374
	TCGA-A6-6142-01	Missense	chr4	153244092	153244092	FBXW7	G	A		Missense_Mutation	p.R689W		0.42			NA	NA				NA			NA	NA			NA	NA				NA			NA	NA	6.421

## Sheet: Fbw7_WT
	sample	Mutation_Type	chr	start	end	gene	reference	alt	altGene	effect	aminoAcid	rnaVaf	dnaVaf	X	X.1	X.2	X.3	X.4	X.5	X.6	X.7	X.8	X.9	X.10	X.11	X.12	X.13	X.14	X.15	X.16	X.17	X.18	X.19	X.20	X.21	X.22	X.23	CIITA expression
	TCGA-DY-A1H8-01	WT	no variant	no variant	no variant	no variant	no variant	no variant	no variant	no variant	no variant	no variant	no variant			NA	NA				NA			NA	NA			NA	NA				NA			NA	NA	5.19
	TCGA-DY-A1DG-01	WT	no variant	no variant	no variant	no variant	no variant	no variant	no variant	no variant	no variant	no variant	no variant			NA	NA				NA			NA	NA			NA	NA				NA			NA	NA	6.824
	TCGA-AZ-4323-01	WT	no variant	no variant	no variant	no variant	no variant	no variant	no variant	no variant	no variant	no variant	no variant			NA	NA				NA			NA	NA			NA	NA				NA			NA	NA	9.758
	TCGA-DC-6155-01	WT	no variant	no variant	no variant	no variant	no variant	no variant	no variant	no variant	no variant	no variant	no variant			NA	NA				NA			NA	NA			NA	NA				NA			NA	NA	5.843
	TCGA-CM-6169-01	WT	no variant	no variant	no variant	no variant	no variant	no variant	no variant	no variant	no variant	no variant	no variant			NA	NA				NA			NA	NA			NA	NA				NA			NA	NA	8.623
	TCGA-5M-AAT6-01	WT	no variant	no variant	no variant	no variant	no variant	no variant	no variant	no variant	no variant	no variant	no variant			NA	NA				NA			NA	NA			NA	NA				NA			NA	NA	9.584
	TCGA-A6-A565-01	WT	no variant	no variant	no variant	no variant	no variant	no variant	no variant	no variant	no variant	no variant	no variant			NA	NA				NA			NA	NA			NA	NA				NA			NA	NA	9.224
	TCGA-DM-A282-01	WT	no variant	no variant	no variant	no variant	no variant	no variant	no variant	no variant	no variant	no variant	no variant			NA	NA				NA			NA	NA			NA	NA				NA			NA	NA	3.742
	TCGA-AA-3489-01	WT	no variant	no variant	no variant	no variant	no variant	no variant	no variant	no variant	no variant	no variant	no variant			NA	NA				NA			NA	NA			NA	NA				NA			NA	NA	9.697
	TCGA-G4-6323-01	WT	no variant	no variant	no variant	no variant	no variant	no variant	no variant	no variant	no variant	no variant	no variant			NA	NA				NA			NA	NA			NA	NA				NA			NA	NA	8.665
	TCGA-AF-A56N-01	WT	no variant	no variant	no variant	no variant	no variant	no variant	no variant	no variant	no variant	no variant	no variant			NA	NA				NA			NA	NA			NA	NA				NA			NA	NA	6.107
	TCGA-AY-A71X-01	WT	no variant	no variant	no variant	no variant	no variant	no variant	no variant	no variant	no variant	no variant	no variant			NA	NA				NA			NA	NA			NA	NA				NA			NA	NA	3.814
	TCGA-AH-6547-01	WT	no variant	no variant	no variant	no variant	no variant	no variant	no variant	no variant	no variant	no variant	no variant			NA	NA				NA			NA	NA			NA	NA				NA			NA	NA	8.851
	TCGA-D5-6924-01	WT	no variant	no variant	no variant	no variant	no variant	no variant	no variant	no variant	no variant	no variant	no variant			NA	NA				NA			NA	NA			NA	NA				NA			NA	NA	8.5
	TCGA-CM-4751-01	WT	no variant	no variant	no variant	no variant	no variant	no variant	no variant	no variant	no variant	no variant	no variant			NA	NA				NA			NA	NA			NA	NA				NA			NA	NA	9.38
	TCGA-A6-6648-01	WT	no variant	no variant	no variant	no variant	no variant	no variant	no variant	no variant	no variant	no variant	no variant			NA	NA				NA			NA	NA			NA	NA				NA			NA	NA	5.778
	TCGA-DM-A28E-01	WT	no variant	no variant	no variant	no variant	no variant	no variant	no variant	no variant	no variant	no variant	no variant			NA	NA				NA			NA	NA			NA	NA				NA			NA	NA	4.916
	TCGA-QG-A5Z2-01	WT	no variant	no variant	no variant	no variant	no variant	no variant	no variant	no variant	no variant	no variant	no variant			NA	NA				NA			NA	NA			NA	NA				NA			NA	NA	9.442
	TCGA-AF-A56K-01	WT	no variant	no variant	no variant	no variant	no variant	no variant	no variant	no variant	no variant	no variant	no variant			NA	NA				NA			NA	NA			NA	NA				NA			NA	NA	7.183
	TCGA-G4-6294-01	WT	no variant	no variant	no variant	no variant	no variant	no variant	no variant	no variant	no variant	no variant	no variant			NA	NA				NA			NA	NA			NA	NA				NA			NA	NA	5.607
	TCGA-A6-5659-01	WT	no variant	no variant	no variant	no variant	no variant	no variant	no variant	no variant	no variant	no variant	no variant			NA	NA				NA			NA	NA			NA	NA				NA			NA	NA	5.568
	TCGA-AZ-6605-01	WT	no variant	no variant	no variant	no variant	no variant	no variant	no variant	no variant	no variant	no variant	no variant			NA	NA				NA			NA	NA			NA	NA				NA			NA	NA	7.317
	TCGA-NH-A8F7-01	WT	no variant	no variant	no variant	no variant	no variant	no variant	no variant	no variant	no variant	no variant	no variant			NA	NA				NA			NA	NA			NA	NA				NA			NA	NA	4.736
	TCGA-CK-5914-01	WT	no variant	no variant	no variant	no variant	no variant	no variant	no variant	no variant	no variant	no variant	no variant			NA	NA				NA			NA	NA			NA	NA				NA			NA	NA	8.068
	TCGA-AZ-4614-01	WT	no variant	no variant	no variant	no variant	no variant	no variant	no variant	no variant	no variant	no variant	no variant			NA	NA				NA			NA	NA			NA	NA				NA			NA	NA	6.499
	TCGA-AA-3697-01	WT	no variant	no variant	no variant	no variant	no variant	no variant	no variant	no variant	no variant	no variant	no variant			NA	NA				NA			NA	NA			NA	NA				NA			NA	NA	6.723
	TCGA-DY-A1DD-01	WT	no variant	no variant	no variant	no variant	no variant	no variant	no variant	no variant	no variant	no variant	no variant			NA	NA				NA			NA	NA			NA	NA				NA			NA	NA	4.675
	TCGA-A6-5664-01	WT	no variant	no variant	no variant	no variant	no variant	no variant	no variant	no variant	no variant	no variant	no variant			NA	NA				NA			NA	NA			NA	NA				NA			NA	NA	8.273
	TCGA-DM-A1D0-01	WT	no variant	no variant	no variant	no variant	no variant	no variant	no variant	no variant	no variant	no variant	no variant			NA	NA				NA			NA	NA			NA	NA				NA			NA	NA	3.502
	TCGA-G4-6626-01	WT	no variant	no variant	no variant	no variant	no variant	no variant	no variant	no variant	no variant	no variant	no variant			NA	NA				NA			NA	NA			NA	NA				NA			NA	NA	7.915
	TCGA-AY-5543-01	WT	no variant	no variant	no variant	no variant	no variant	no variant	no variant	no variant	no variant	no variant	no variant			NA	NA				NA			NA	NA			NA	NA				NA			NA	NA	9.231
	TCGA-EI-6506-01	WT	no variant	no variant	no variant	no variant	no variant	no variant	no variant	no variant	no variant	no variant	no variant			NA	NA				NA			NA	NA			NA	NA				NA			NA	NA	7.44
	TCGA-AG-3731-01	WT	no variant	no variant	no variant	no variant	no variant	no variant	no variant	no variant	no variant	no variant	no variant			NA	NA				NA			NA	NA			NA	NA				NA			NA	NA	8.335
	TCGA-CM-6161-01	WT	no variant	no variant	no variant	no variant	no variant	no variant	no variant	no variant	no variant	no variant	no variant			NA	NA				NA			NA	NA			NA	NA				NA			NA	NA	6.938
	TCGA-CM-6679-01	WT	no variant	no variant	no variant	no variant	no variant	no variant	no variant	no variant	no variant	no variant	no variant			NA	NA				NA			NA	NA			NA	NA				NA			NA	NA	6.836
	TCGA-DM-A288-01	WT	no variant	no variant	no variant	no variant	no variant	no variant	no variant	no variant	no variant	no variant	no variant			NA	NA				NA			NA	NA			NA	NA				NA			NA	NA	2.84
	TCGA-CM-6165-01	WT	no variant	no variant	no variant	no variant	no variant	no variant	no variant	no variant	no variant	no variant	no variant			NA	NA				NA			NA	NA			NA	NA				NA			NA	NA	7.231
	TCGA-5M-AATA-01	WT	no variant	no variant	no variant	no variant	no variant	no variant	no variant	no variant	no variant	no variant	no variant			NA	NA				NA			NA	NA			NA	NA				NA			NA	NA	6.092
	TCGA-AY-6197-01	WT	no variant	no variant	no variant	no variant	no variant	no variant	no variant	no variant	no variant	no variant	no variant			NA	NA				NA			NA	NA			NA	NA				NA			NA	NA	9.459
	TCGA-F4-6463-01	WT	no variant	no variant	no variant	no variant	no variant	no variant	no variant	no variant	no variant	no variant	no variant			NA	NA				NA			NA	NA			NA	NA				NA			NA	NA	6.2
	TCGA-D5-6929-01	WT	no variant	no variant	no variant	no variant	no variant	no variant	no variant	no variant	no variant	no variant	no variant			NA	NA				NA			NA	NA			NA	NA				NA			NA	NA	5.895
	TCGA-A6-6138-01	WT	no variant	no variant	no variant	no variant	no variant	no variant	no variant	no variant	no variant	no variant	no variant			NA	NA				NA			NA	NA			NA	NA				NA			NA	NA	8.932
	TCGA-DY-A1DF-01	WT	no variant	no variant	no variant	no variant	no variant	no variant	no variant	no variant	no variant	no variant	no variant			NA	NA				NA			NA	NA			NA	NA				NA			NA	NA	4.372
	TCGA-AM-5820-01	WT	no variant	no variant	no variant	no variant	no variant	no variant	no variant	no variant	no variant	no variant	no variant			NA	NA				NA			NA	NA			NA	NA				NA			NA	NA	4.68
	TCGA-CM-6167-01	WT	no variant	no variant	no variant	no variant	no variant	no variant	no variant	no variant	no variant	no variant	no variant			NA	NA				NA			NA	NA			NA	NA				NA			NA	NA	7.913
	TCGA-DC-6683-01	WT	no variant	no variant	no variant	no variant	no variant	no variant	no variant	no variant	no variant	no variant	no variant			NA	NA				NA			NA	NA			NA	NA				NA			NA	NA	5.29
	TCGA-DM-A1D4-01	WT	no variant	no variant	no variant	no variant	no variant	no variant	no variant	no variant	no variant	no variant	no variant			NA	NA				NA			NA	NA			NA	NA				NA			NA	NA	7.016
	TCGA-G4-6314-01	WT	no variant	no variant	no variant	no variant	no variant	no variant	no variant	no variant	no variant	no variant	no variant			NA	NA				NA			NA	NA			NA	NA				NA			NA	NA	7.061
	TCGA-QL-A97D-01	WT	no variant	no variant	no variant	no variant	no variant	no variant	no variant	no variant	no variant	no variant	no variant			NA	NA				NA			NA	NA			NA	NA				NA			NA	NA	9.083
	TCGA-CM-6168-01	WT	no variant	no variant	no variant	no variant	no variant	no variant	no variant	no variant	no variant	no variant	no variant			NA	NA				NA			NA	NA			NA	NA				NA			NA	NA	8.476
	TCGA-AY-A8YK-01	WT	no variant	no variant	no variant	no variant	no variant	no variant	no variant	no variant	no variant	no variant	no variant			NA	NA				NA			NA	NA			NA	NA				NA			NA	NA	5.918
	TCGA-AD-6963-01	WT	no variant	no variant	no variant	no variant	no variant	no variant	no variant	no variant	no variant	no variant	no variant			NA	NA				NA			NA	NA			NA	NA				NA			NA	NA	9.449
	TCGA-CI-6622-01	WT	no variant	no variant	no variant	no variant	no variant	no variant	no variant	no variant	no variant	no variant	no variant			NA	NA				NA			NA	NA			NA	NA				NA			NA	NA	4.553
	TCGA-A6-5665-01	WT	no variant	no variant	no variant	no variant	no variant	no variant	no variant	no variant	no variant	no variant	no variant			NA	NA				NA			NA	NA			NA	NA				NA			NA	NA	6.886
	TCGA-AF-6672-01	WT	no variant	no variant	no variant	no variant	no variant	no variant	no variant	no variant	no variant	no variant	no variant			NA	NA				NA			NA	NA			NA	NA				NA			NA	NA	6.475
	TCGA-F5-6813-01	WT	no variant	no variant	no variant	no variant	no variant	no variant	no variant	no variant	no variant	no variant	no variant			NA	NA				NA			NA	NA			NA	NA				NA			NA	NA	6.873
	TCGA-DY-A1DC-01	WT	no variant	no variant	no variant	no variant	no variant	no variant	no variant	no variant	no variant	no variant	no variant			NA	NA				NA			NA	NA			NA	NA				NA			NA	NA	6.37
	TCGA-G4-6315-01	WT	no variant	no variant	no variant	no variant	no variant	no variant	no variant	no variant	no variant	no variant	no variant			NA	NA				NA			NA	NA			NA	NA				NA			NA	NA	5.287
	TCGA-CA-6715-01	WT	no variant	no variant	no variant	no variant	no variant	no variant	no variant	no variant	no variant	no variant	no variant			NA	NA				NA			NA	NA			NA	NA				NA			NA	NA	5.083
	TCGA-AD-6895-01	WT	no variant	no variant	no variant	no variant	no variant	no variant	no variant	no variant	no variant	no variant	no variant			NA	NA				NA			NA	NA			NA	NA				NA			NA	NA	9.575
	TCGA-A6-6782-01	WT	no variant	no variant	no variant	no variant	no variant	no variant	no variant	no variant	no variant	no variant	no variant			NA	NA				NA			NA	NA			NA	NA				NA			NA	NA	7.699
	TCGA-CL-5917-01	WT	no variant	no variant	no variant	no variant	no variant	no variant	no variant	no variant	no variant	no variant	no variant			NA	NA				NA			NA	NA			NA	NA				NA			NA	NA	4.452
	TCGA-QG-A5Z1-01	WT	no variant	no variant	no variant	no variant	no variant	no variant	no variant	no variant	no variant	no variant	no variant			NA	NA				NA			NA	NA			NA	NA				NA			NA	NA	6.223
	TCGA-3L-AA1B-01	WT	no variant	no variant	no variant	no variant	no variant	no variant	no variant	no variant	no variant	no variant	no variant			NA	NA				NA			NA	NA			NA	NA				NA			NA	NA	7.205
	TCGA-EI-6881-01	WT	no variant	no variant	no variant	no variant	no variant	no variant	no variant	no variant	no variant	no variant	no variant			NA	NA				NA			NA	NA			NA	NA				NA			NA	NA	6.755
	TCGA-EI-6511-01	WT	no variant	no variant	no variant	no variant	no variant	no variant	no variant	no variant	no variant	no variant	no variant			NA	NA				NA			NA	NA			NA	NA				NA			NA	NA	8.953
	TCGA-DM-A28H-01	WT	no variant	no variant	no variant	no variant	no variant	no variant	no variant	no variant	no variant	no variant	no variant			NA	NA				NA			NA	NA			NA	NA				NA			NA	NA	4.604
	TCGA-A6-6651-01	WT	no variant	no variant	no variant	no variant	no variant	no variant	no variant	no variant	no variant	no variant	no variant			NA	NA				NA			NA	NA			NA	NA				NA			NA	NA	8.722
	TCGA-D5-6529-01	WT	no variant	no variant	no variant	no variant	no variant	no variant	no variant	no variant	no variant	no variant	no variant			NA	NA				NA			NA	NA			NA	NA				NA			NA	NA	8.175
	TCGA-F4-6854-01	WT	no variant	no variant	no variant	no variant	no variant	no variant	no variant	no variant	no variant	no variant	no variant			NA	NA				NA			NA	NA			NA	NA				NA			NA	NA	7.635
	TCGA-AZ-6608-01	WT	no variant	no variant	no variant	no variant	no variant	no variant	no variant	no variant	no variant	no variant	no variant			NA	NA				NA			NA	NA			NA	NA				NA			NA	NA	5.882
	TCGA-CM-6166-01	WT	no variant	no variant	no variant	no variant	no variant	no variant	no variant	no variant	no variant	no variant	no variant			NA	NA				NA			NA	NA			NA	NA				NA			NA	NA	3.942
	TCGA-CM-5344-01	WT	no variant	no variant	no variant	no variant	no variant	no variant	no variant	no variant	no variant	no variant	no variant			NA	NA				NA			NA	NA			NA	NA				NA			NA	NA	5.667
	TCGA-CL-4957-01	WT	no variant	no variant	no variant	no variant	no variant	no variant	no variant	no variant	no variant	no variant	no variant			NA	NA				NA			NA	NA			NA	NA				NA			NA	NA	5.207
	TCGA-G4-6322-01	WT	no variant	no variant	no variant	no variant	no variant	no variant	no variant	no variant	no variant	no variant	no variant			NA	NA				NA			NA	NA			NA	NA				NA			NA	NA	6.113
	TCGA-G4-6627-01	WT	no variant	no variant	no variant	no variant	no variant	no variant	no variant	no variant	no variant	no variant	no variant			NA	NA				NA			NA	NA			NA	NA				NA			NA	NA	7.456
	TCGA-G5-6235-01	WT	no variant	no variant	no variant	no variant	no variant	no variant	no variant	no variant	no variant	no variant	no variant			NA	NA				NA			NA	NA			NA	NA				NA			NA	NA	4.956
	TCGA-EI-6508-01	WT	no variant	no variant	no variant	no variant	no variant	no variant	no variant	no variant	no variant	no variant	no variant			NA	NA				NA			NA	NA			NA	NA				NA			NA	NA	5.786
	TCGA-F4-6809-01	WT	no variant	no variant	no variant	no variant	no variant	no variant	no variant	no variant	no variant	no variant	no variant			NA	NA				NA			NA	NA			NA	NA				NA			NA	NA	8.152
	TCGA-CM-6676-01	WT	no variant	no variant	no variant	no variant	no variant	no variant	no variant	no variant	no variant	no variant	no variant			NA	NA				NA			NA	NA			NA	NA				NA			NA	NA	5.902
	TCGA-AU-6004-01	WT	no variant	no variant	no variant	no variant	no variant	no variant	no variant	no variant	no variant	no variant	no variant			NA	NA				NA			NA	NA			NA	NA				NA			NA	NA	10.63
	TCGA-F5-6861-01	WT	no variant	no variant	no variant	no variant	no variant	no variant	no variant	no variant	no variant	no variant	no variant			NA	NA				NA			NA	NA			NA	NA				NA			NA	NA	6.611
	TCGA-AA-3712-01	WT	no variant	no variant	no variant	no variant	no variant	no variant	no variant	no variant	no variant	no variant	no variant			NA	NA				NA			NA	NA			NA	NA				NA			NA	NA	7.325
	TCGA-AG-4022-01	WT	no variant	no variant	no variant	no variant	no variant	no variant	no variant	no variant	no variant	no variant	no variant			NA	NA				NA			NA	NA			NA	NA				NA			NA	NA	7.155
	TCGA-AF-A56L-01	WT	no variant	no variant	no variant	no variant	no variant	no variant	no variant	no variant	no variant	no variant	no variant			NA	NA				NA			NA	NA			NA	NA				NA			NA	NA	6.674
	TCGA-G4-6320-01	WT	no variant	no variant	no variant	no variant	no variant	no variant	no variant	no variant	no variant	no variant	no variant			NA	NA				NA			NA	NA			NA	NA				NA			NA	NA	5.289
	TCGA-CK-4947-01	WT	no variant	no variant	no variant	no variant	no variant	no variant	no variant	no variant	no variant	no variant	no variant			NA	NA				NA			NA	NA			NA	NA				NA			NA	NA	7.126
	TCGA-G4-6307-01	WT	no variant	no variant	no variant	no variant	no variant	no variant	no variant	no variant	no variant	no variant	no variant			NA	NA				NA			NA	NA			NA	NA				NA			NA	NA	4.898
	TCGA-D5-7000-01	WT	no variant	no variant	no variant	no variant	no variant	no variant	no variant	no variant	no variant	no variant	no variant			NA	NA				NA			NA	NA			NA	NA				NA			NA	NA	7.599
	TCGA-D5-6922-01	WT	no variant	no variant	no variant	no variant	no variant	no variant	no variant	no variant	no variant	no variant	no variant			NA	NA				NA			NA	NA			NA	NA				NA			NA	NA	7.757
	TCGA-AF-2690-01	WT	no variant	no variant	no variant	no variant	no variant	no variant	no variant	no variant	no variant	no variant	no variant			NA	NA				NA			NA	NA			NA	NA				NA			NA	NA	8.601
	TCGA-G5-6641-01	WT	no variant	no variant	no variant	no variant	no variant	no variant	no variant	no variant	no variant	no variant	no variant			NA	NA				NA			NA	NA			NA	NA				NA			NA	NA	3.988
	TCGA-DY-A0XA-01	WT	no variant	no variant	no variant	no variant	no variant	no variant	no variant	no variant	no variant	no variant	no variant			NA	NA				NA			NA	NA			NA	NA				NA			NA	NA	6.855
	TCGA-F5-6465-01	WT	no variant	no variant	no variant	no variant	no variant	no variant	no variant	no variant	no variant	no variant	no variant			NA	NA				NA			NA	NA			NA	NA				NA			NA	NA	7.79
	TCGA-AY-A69D-01	WT	no variant	no variant	no variant	no variant	no variant	no variant	no variant	no variant	no variant	no variant	no variant			NA	NA				NA			NA	NA			NA	NA				NA			NA	NA	6.734
	TCGA-AA-A01P-01	WT	no variant	no variant	no variant	no variant	no variant	no variant	no variant	no variant	no variant	no variant	no variant			NA	NA				NA			NA	NA			NA	NA				NA			NA	NA	11.62
	TCGA-CM-5349-01	WT	no variant	no variant	no variant	no variant	no variant	no variant	no variant	no variant	no variant	no variant	no variant			NA	NA				NA			NA	NA			NA	NA				NA			NA	NA	6.996
	TCGA-G4-6303-01	WT	no variant	no variant	no variant	no variant	no variant	no variant	no variant	no variant	no variant	no variant	no variant			NA	NA				NA			NA	NA			NA	NA				NA			NA	NA	6.505
	TCGA-A6-5656-01	WT	no variant	no variant	no variant	no variant	no variant	no variant	no variant	no variant	no variant	no variant	no variant			NA	NA				NA			NA	NA			NA	NA				NA			NA	NA	4.755
	TCGA-G4-6311-01	WT	no variant	no variant	no variant	no variant	no variant	no variant	no variant	no variant	no variant	no variant	no variant			NA	NA				NA			NA	NA			NA	NA				NA			NA	NA	7.461
	TCGA-AA-3655-01	WT	no variant	no variant	no variant	no variant	no variant	no variant	no variant	no variant	no variant	no variant	no variant			NA	NA				NA			NA	NA			NA	NA				NA			NA	NA	8.064
	TCGA-SS-A7HO-01	WT	no variant	no variant	no variant	no variant	no variant	no variant	no variant	no variant	no variant	no variant	no variant			NA	NA				NA			NA	NA			NA	NA				NA			NA	NA	4.096
	TCGA-BM-6198-01	WT	no variant	no variant	no variant	no variant	no variant	no variant	no variant	no variant	no variant	no variant	no variant			NA	NA				NA			NA	NA			NA	NA				NA			NA	NA	8.794
	TCGA-F4-6703-01	WT	no variant	no variant	no variant	no variant	no variant	no variant	no variant	no variant	no variant	no variant	no variant			NA	NA				NA			NA	NA			NA	NA				NA			NA	NA	10.05
	TCGA-5M-AATE-01	WT	no variant	no variant	no variant	no variant	no variant	no variant	no variant	no variant	no variant	no variant	no variant			NA	NA				NA			NA	NA			NA	NA				NA			NA	NA	5.787
	TCGA-AH-6644-01	WT	no variant	no variant	no variant	no variant	no variant	no variant	no variant	no variant	no variant	no variant	no variant			NA	NA				NA			NA	NA			NA	NA				NA			NA	NA	6.976
	TCGA-DM-A0XF-01	WT	no variant	no variant	no variant	no variant	no variant	no variant	no variant	no variant	no variant	no variant	no variant			NA	NA				NA			NA	NA			NA	NA				NA			NA	NA	7.639
	TCGA-NH-A50V-01	WT	no variant	no variant	no variant	no variant	no variant	no variant	no variant	no variant	no variant	no variant	no variant			NA	NA				NA			NA	NA			NA	NA				NA			NA	NA	8.526
	TCGA-A6-4105-01	WT	no variant	no variant	no variant	no variant	no variant	no variant	no variant	no variant	no variant	no variant	no variant			NA	NA				NA			NA	NA			NA	NA				NA			NA	NA	8.107
	TCGA-G4-6297-01	WT	no variant	no variant	no variant	no variant	no variant	no variant	no variant	no variant	no variant	no variant	no variant			NA	NA				NA			NA	NA			NA	NA				NA			NA	NA	7.737
	TCGA-CM-6680-01	WT	no variant	no variant	no variant	no variant	no variant	no variant	no variant	no variant	no variant	no variant	no variant			NA	NA				NA			NA	NA			NA	NA				NA			NA	NA	9.311
	TCGA-D5-6926-01	WT	no variant	no variant	no variant	no variant	no variant	no variant	no variant	no variant	no variant	no variant	no variant			NA	NA				NA			NA	NA			NA	NA				NA			NA	NA	7.613
	TCGA-G4-6299-01	WT	no variant	no variant	no variant	no variant	no variant	no variant	no variant	no variant	no variant	no variant	no variant			NA	NA				NA			NA	NA			NA	NA				NA			NA	NA	7.827
	TCGA-CM-6164-01	WT	no variant	no variant	no variant	no variant	no variant	no variant	no variant	no variant	no variant	no variant	no variant			NA	NA				NA			NA	NA			NA	NA				NA			NA	NA	8.873
	TCGA-G4-6625-01	WT	no variant	no variant	no variant	no variant	no variant	no variant	no variant	no variant	no variant	no variant	no variant			NA	NA				NA			NA	NA			NA	NA				NA			NA	NA	9.646
	TCGA-AA-3663-01	WT	no variant	no variant	no variant	no variant	no variant	no variant	no variant	no variant	no variant	no variant	no variant			NA	NA				NA			NA	NA			NA	NA				NA			NA	NA	7.285
	TCGA-AZ-6603-01	WT	no variant	no variant	no variant	no variant	no variant	no variant	no variant	no variant	no variant	no variant	no variant			NA	NA				NA			NA	NA			NA	NA				NA			NA	NA	8.395
	TCGA-AD-6890-01	WT	no variant	no variant	no variant	no variant	no variant	no variant	no variant	no variant	no variant	no variant	no variant			NA	NA				NA			NA	NA			NA	NA				NA			NA	NA	6.457
	TCGA-CK-4951-01	WT	no variant	no variant	no variant	no variant	no variant	no variant	no variant	no variant	no variant	no variant	no variant			NA	NA				NA			NA	NA			NA	NA				NA			NA	NA	9.856
	TCGA-QG-A5YV-01	WT	no variant	no variant	no variant	no variant	no variant	no variant	no variant	no variant	no variant	no variant	no variant			NA	NA				NA			NA	NA			NA	NA				NA			NA	NA	5.349
	TCGA-F5-6863-01	WT	no variant	no variant	no variant	no variant	no variant	no variant	no variant	no variant	no variant	no variant	no variant			NA	NA				NA			NA	NA			NA	NA				NA			NA	NA	4.319
	TCGA-D5-6540-01	WT	no variant	no variant	no variant	no variant	no variant	no variant	no variant	no variant	no variant	no variant	no variant			NA	NA				NA			NA	NA			NA	NA				NA			NA	NA	8.624
	TCGA-AA-3496-01	WT	no variant	no variant	no variant	no variant	no variant	no variant	no variant	no variant	no variant	no variant	no variant			NA	NA				NA			NA	NA			NA	NA				NA			NA	NA	9.291
	TCGA-NH-A5IV-01	WT	no variant	no variant	no variant	no variant	no variant	no variant	no variant	no variant	no variant	no variant	no variant			NA	NA				NA			NA	NA			NA	NA				NA			NA	NA	8.71
	TCGA-F5-6864-01	WT	no variant	no variant	no variant	no variant	no variant	no variant	no variant	no variant	no variant	no variant	no variant			NA	NA				NA			NA	NA			NA	NA				NA			NA	NA	7.86
	TCGA-AD-A5EK-01	WT	no variant	no variant	no variant	no variant	no variant	no variant	no variant	no variant	no variant	no variant	no variant			NA	NA				NA			NA	NA			NA	NA				NA			NA	NA	5.772
	TCGA-DM-A0X9-01	WT	no variant	no variant	no variant	no variant	no variant	no variant	no variant	no variant	no variant	no variant	no variant			NA	NA				NA			NA	NA			NA	NA				NA			NA	NA	7.31
	TCGA-F4-6461-01	WT	no variant	no variant	no variant	no variant	no variant	no variant	no variant	no variant	no variant	no variant	no variant			NA	NA				NA			NA	NA			NA	NA				NA			NA	NA	8.384
	TCGA-AA-3502-01	WT	no variant	no variant	no variant	no variant	no variant	no variant	no variant	no variant	no variant	no variant	no variant			NA	NA				NA			NA	NA			NA	NA				NA			NA	NA	5.94
	TCGA-DM-A1D6-01	WT	no variant	no variant	no variant	no variant	no variant	no variant	no variant	no variant	no variant	no variant	no variant			NA	NA				NA			NA	NA			NA	NA				NA			NA	NA	3.444
	TCGA-DM-A28F-01	WT	no variant	no variant	no variant	no variant	no variant	no variant	no variant	no variant	no variant	no variant	no variant			NA	NA				NA			NA	NA			NA	NA				NA			NA	NA	4.969
	TCGA-CM-6171-01	WT	no variant	no variant	no variant	no variant	no variant	no variant	no variant	no variant	no variant	no variant	no variant			NA	NA				NA			NA	NA			NA	NA				NA			NA	NA	6.259
	TCGA-EI-6885-01	WT	no variant	no variant	no variant	no variant	no variant	no variant	no variant	no variant	no variant	no variant	no variant			NA	NA				NA			NA	NA			NA	NA				NA			NA	NA	7.646
	TCGA-F5-6810-01	WT	no variant	no variant	no variant	no variant	no variant	no variant	no variant	no variant	no variant	no variant	no variant			NA	NA				NA			NA	NA			NA	NA				NA			NA	NA	5.425
	TCGA-F4-6807-01	WT	no variant	no variant	no variant	no variant	no variant	no variant	no variant	no variant	no variant	no variant	no variant			NA	NA				NA			NA	NA			NA	NA				NA			NA	NA	8.514
	TCGA-D5-6535-01	WT	no variant	no variant	no variant	no variant	no variant	no variant	no variant	no variant	no variant	no variant	no variant			NA	NA				NA			NA	NA			NA	NA				NA			NA	NA	9.963
	TCGA-DM-A28A-01	WT	no variant	no variant	no variant	no variant	no variant	no variant	no variant	no variant	no variant	no variant	no variant			NA	NA				NA			NA	NA			NA	NA				NA			NA	NA	6.409
	TCGA-AD-6965-01	WT	no variant	no variant	no variant	no variant	no variant	no variant	no variant	no variant	no variant	no variant	no variant			NA	NA				NA			NA	NA			NA	NA				NA			NA	NA	5.554
	TCGA-D5-6533-01	WT	no variant	no variant	no variant	no variant	no variant	no variant	no variant	no variant	no variant	no variant	no variant			NA	NA				NA			NA	NA			NA	NA				NA			NA	NA	6.961
	TCGA-G4-6317-01	WT	no variant	no variant	no variant	no variant	no variant	no variant	no variant	no variant	no variant	no variant	no variant			NA	NA				NA			NA	NA			NA	NA				NA			NA	NA	4.443
	TCGA-D5-6534-01	WT	no variant	no variant	no variant	no variant	no variant	no variant	no variant	no variant	no variant	no variant	no variant			NA	NA				NA			NA	NA			NA	NA				NA			NA	NA	9.731
	TCGA-D5-5541-01	WT	no variant	no variant	no variant	no variant	no variant	no variant	no variant	no variant	no variant	no variant	no variant			NA	NA				NA			NA	NA			NA	NA				NA			NA	NA	7.615
	TCGA-DT-5265-01	WT	no variant	no variant	no variant	no variant	no variant	no variant	no variant	no variant	no variant	no variant	no variant			NA	NA				NA			NA	NA			NA	NA				NA			NA	NA	7.156
	TCGA-D5-6539-01	WT	no variant	no variant	no variant	no variant	no variant	no variant	no variant	no variant	no variant	no variant	no variant			NA	NA				NA			NA	NA			NA	NA				NA			NA	NA	7.241
	TCGA-DC-6157-01	WT	no variant	no variant	no variant	no variant	no variant	no variant	no variant	no variant	no variant	no variant	no variant			NA	NA				NA			NA	NA			NA	NA				NA			NA	NA	6.055
	TCGA-A6-5660-01	WT	no variant	no variant	no variant	no variant	no variant	no variant	no variant	no variant	no variant	no variant	no variant			NA	NA				NA			NA	NA			NA	NA				NA			NA	NA	6.051
	TCGA-CI-6624-01	WT	no variant	no variant	no variant	no variant	no variant	no variant	no variant	no variant	no variant	no variant	no variant			NA	NA				NA			NA	NA			NA	NA				NA			NA	NA	6.971
	TCGA-AA-3506-01	WT	no variant	no variant	no variant	no variant	no variant	no variant	no variant	no variant	no variant	no variant	no variant			NA	NA				NA			NA	NA			NA	NA				NA			NA	NA	6.961
	TCGA-DM-A1HA-01	WT	no variant	no variant	no variant	no variant	no variant	no variant	no variant	no variant	no variant	no variant	no variant			NA	NA				NA			NA	NA			NA	NA				NA			NA	NA	5.564
	TCGA-CA-5797-01	WT	no variant	no variant	no variant	no variant	no variant	no variant	no variant	no variant	no variant	no variant	no variant			NA	NA				NA			NA	NA			NA	NA				NA			NA	NA	7.62
	TCGA-CI-6623-01	WT	no variant	no variant	no variant	no variant	no variant	no variant	no variant	no variant	no variant	no variant	no variant			NA	NA				NA			NA	NA			NA	NA				NA			NA	NA	6.169
	TCGA-CM-4747-01	WT	no variant	no variant	no variant	no variant	no variant	no variant	no variant	no variant	no variant	no variant	no variant			NA	NA				NA			NA	NA			NA	NA				NA			NA	NA	5.135
	TCGA-AF-6655-01	WT	no variant	no variant	no variant	no variant	no variant	no variant	no variant	no variant	no variant	no variant	no variant			NA	NA				NA			NA	NA			NA	NA				NA			NA	NA	7.397
	TCGA-D5-6538-01	WT	no variant	no variant	no variant	no variant	no variant	no variant	no variant	no variant	no variant	no variant	no variant			NA	NA				NA			NA	NA			NA	NA				NA			NA	NA	3.252
	TCGA-D5-6920-01	WT	no variant	no variant	no variant	no variant	no variant	no variant	no variant	no variant	no variant	no variant	no variant			NA	NA				NA			NA	NA			NA	NA				NA			NA	NA	7.193
	TCGA-EI-6884-01	WT	no variant	no variant	no variant	no variant	no variant	no variant	no variant	no variant	no variant	no variant	no variant			NA	NA				NA			NA	NA			NA	NA				NA			NA	NA	8.469
	TCGA-G4-6310-01	WT	no variant	no variant	no variant	no variant	no variant	no variant	no variant	no variant	no variant	no variant	no variant			NA	NA				NA			NA	NA			NA	NA				NA			NA	NA	3.207
	TCGA-4T-AA8H-01	WT	no variant	no variant	no variant	no variant	no variant	no variant	no variant	no variant	no variant	no variant	no variant			NA	NA				NA			NA	NA			NA	NA				NA			NA	NA	6.014
	TCGA-CM-6163-01	WT	no variant	no variant	no variant	no variant	no variant	no variant	no variant	no variant	no variant	no variant	no variant			NA	NA				NA			NA	NA			NA	NA				NA			NA	NA	7.173
	TCGA-D5-6541-01	WT	no variant	no variant	no variant	no variant	no variant	no variant	no variant	no variant	no variant	no variant	no variant			NA	NA				NA			NA	NA			NA	NA				NA			NA	NA	8.902
	TCGA-DC-5337-01	WT	no variant	no variant	no variant	no variant	no variant	no variant	no variant	no variant	no variant	no variant	no variant			NA	NA				NA			NA	NA			NA	NA				NA			NA	NA	8.042
	TCGA-D5-5538-01	WT	no variant	no variant	no variant	no variant	no variant	no variant	no variant	no variant	no variant	no variant	no variant			NA	NA				NA			NA	NA			NA	NA				NA			NA	NA	7.683
	TCGA-NH-A8F8-01	WT	no variant	no variant	no variant	no variant	no variant	no variant	no variant	no variant	no variant	no variant	no variant			NA	NA				NA			NA	NA			NA	NA				NA			NA	NA	6.625
	TCGA-F4-6570-01	WT	no variant	no variant	no variant	no variant	no variant	no variant	no variant	no variant	no variant	no variant	no variant			NA	NA				NA			NA	NA			NA	NA				NA			NA	NA	10.2
	TCGA-G4-6306-01	WT	no variant	no variant	no variant	no variant	no variant	no variant	no variant	no variant	no variant	no variant	no variant			NA	NA				NA			NA	NA			NA	NA				NA			NA	NA	8.404
	TCGA-F5-6571-01	WT	no variant	no variant	no variant	no variant	no variant	no variant	no variant	no variant	no variant	no variant	no variant			NA	NA				NA			NA	NA			NA	NA				NA			NA	NA	8.21
	TCGA-AH-6544-01	WT	no variant	no variant	no variant	no variant	no variant	no variant	no variant	no variant	no variant	no variant	no variant			NA	NA				NA			NA	NA			NA	NA				NA			NA	NA	4.581
	TCGA-CK-5916-01	WT	no variant	no variant	no variant	no variant	no variant	no variant	no variant	no variant	no variant	no variant	no variant			NA	NA				NA			NA	NA			NA	NA				NA			NA	NA	10.28
	TCGA-F5-6811-01	WT	no variant	no variant	no variant	no variant	no variant	no variant	no variant	no variant	no variant	no variant	no variant			NA	NA				NA			NA	NA			NA	NA				NA			NA	NA	5.68
	TCGA-F5-6702-01	WT	no variant	no variant	no variant	no variant	no variant	no variant	no variant	no variant	no variant	no variant	no variant			NA	NA				NA			NA	NA			NA	NA				NA			NA	NA	6.819
	TCGA-AA-3662-01	WT	no variant	no variant	no variant	no variant	no variant	no variant	no variant	no variant	no variant	no variant	no variant			NA	NA				NA			NA	NA			NA	NA				NA			NA	NA	7.444
	TCGA-AZ-6600-01	WT	no variant	no variant	no variant	no variant	no variant	no variant	no variant	no variant	no variant	no variant	no variant			NA	NA				NA			NA	NA			NA	NA				NA			NA	NA	7.228
	TCGA-A6-6649-01	WT	no variant	no variant	no variant	no variant	no variant	no variant	no variant	no variant	no variant	no variant	no variant			NA	NA				NA			NA	NA			NA	NA				NA			NA	NA	8.152
	TCGA-EI-6510-01	WT	no variant	no variant	no variant	no variant	no variant	no variant	no variant	no variant	no variant	no variant	no variant			NA	NA				NA			NA	NA			NA	NA				NA			NA	NA	7.72
	TCGA-AD-6901-01	WT	no variant	no variant	no variant	no variant	no variant	no variant	no variant	no variant	no variant	no variant	no variant			NA	NA				NA			NA	NA			NA	NA				NA			NA	NA	8.694
	TCGA-D5-6932-01	WT	no variant	no variant	no variant	no variant	no variant	no variant	no variant	no variant	no variant	no variant	no variant			NA	NA				NA			NA	NA			NA	NA				NA			NA	NA	6.305
	TCGA-NH-A50U-01	WT	no variant	no variant	no variant	no variant	no variant	no variant	no variant	no variant	no variant	no variant	no variant			NA	NA				NA			NA	NA			NA	NA				NA			NA	NA	5.774
	TCGA-CK-5912-01	WT	no variant	no variant	no variant	no variant	no variant	no variant	no variant	no variant	no variant	no variant	no variant			NA	NA				NA			NA	NA			NA	NA				NA			NA	NA	5.489
	TCGA-G5-6572-01	WT	no variant	no variant	no variant	no variant	no variant	no variant	no variant	no variant	no variant	no variant	no variant			NA	NA				NA			NA	NA			NA	NA				NA			NA	NA	5.284
	TCGA-DM-A1D7-01	WT	no variant	no variant	no variant	no variant	no variant	no variant	no variant	no variant	no variant	no variant	no variant			NA	NA				NA			NA	NA			NA	NA				NA			NA	NA	6.019
	TCGA-A6-A566-01	WT	no variant	no variant	no variant	no variant	no variant	no variant	no variant	no variant	no variant	no variant	no variant			NA	NA				NA			NA	NA			NA	NA				NA			NA	NA	8.664
	TCGA-EI-6882-01	WT	no variant	no variant	no variant	no variant	no variant	no variant	no variant	no variant	no variant	no variant	no variant			NA	NA				NA			NA	NA			NA	NA				NA			NA	NA	6.96
	TCGA-AG-3732-01	WT	no variant	no variant	no variant	no variant	no variant	no variant	no variant	no variant	no variant	no variant	no variant			NA	NA				NA			NA	NA			NA	NA				NA			NA	NA	8.235
	TCGA-A6-A56B-01	WT	no variant	no variant	no variant	no variant	no variant	no variant	no variant	no variant	no variant	no variant	no variant			NA	NA				NA			NA	NA			NA	NA				NA			NA	NA	5.372
	TCGA-AD-A5EJ-01	WT	no variant	no variant	no variant	no variant	no variant	no variant	no variant	no variant	no variant	no variant	no variant			NA	NA				NA			NA	NA			NA	NA				NA			NA	NA	6.585
	TCGA-CM-5860-01	WT	no variant	no variant	no variant	no variant	no variant	no variant	no variant	no variant	no variant	no variant	no variant			NA	NA				NA			NA	NA			NA	NA				NA			NA	NA	6.351
	TCGA-DC-6158-01	WT	no variant	no variant	no variant	no variant	no variant	no variant	no variant	no variant	no variant	no variant	no variant			NA	NA				NA			NA	NA			NA	NA				NA			NA	NA	8.85
	TCGA-G4-6588-01	WT	no variant	no variant	no variant	no variant	no variant	no variant	no variant	no variant	no variant	no variant	no variant			NA	NA				NA			NA	NA			NA	NA				NA			NA	NA	8.713
	TCGA-CI-6621-01	WT	no variant	no variant	no variant	no variant	no variant	no variant	no variant	no variant	no variant	no variant	no variant			NA	NA				NA			NA	NA			NA	NA				NA			NA	NA	7.429
	TCGA-CA-5796-01	WT	no variant	no variant	no variant	no variant	no variant	no variant	no variant	no variant	no variant	no variant	no variant			NA	NA				NA			NA	NA			NA	NA				NA			NA	NA	6.303
	TCGA-AG-3591-01	WT	no variant	no variant	no variant	no variant	no variant	no variant	no variant	no variant	no variant	no variant	no variant			NA	NA				NA			NA	NA			NA	NA				NA			NA	NA	6.88
	TCGA-F4-6855-01	WT	no variant	no variant	no variant	no variant	no variant	no variant	no variant	no variant	no variant	no variant	no variant			NA	NA				NA			NA	NA			NA	NA				NA			NA	NA	6.622
	TCGA-CA-5256-01	WT	no variant	no variant	no variant	no variant	no variant	no variant	no variant	no variant	no variant	no variant	no variant			NA	NA				NA			NA	NA			NA	NA				NA			NA	NA	6.471
	TCGA-CA-5255-01	WT	no variant	no variant	no variant	no variant	no variant	no variant	no variant	no variant	no variant	no variant	no variant			NA	NA				NA			NA	NA			NA	NA				NA			NA	NA	5.1
	TCGA-AZ-4682-01	WT	no variant	no variant	no variant	no variant	no variant	no variant	no variant	no variant	no variant	no variant	no variant			NA	NA				NA			NA	NA			NA	NA				NA			NA	NA	4.505
	TCGA-D5-5537-01	WT	no variant	no variant	no variant	no variant	no variant	no variant	no variant	no variant	no variant	no variant	no variant			NA	NA				NA			NA	NA			NA	NA				NA			NA	NA	6.261
	TCGA-A6-6780-01	WT	no variant	no variant	no variant	no variant	no variant	no variant	no variant	no variant	no variant	no variant	no variant			NA	NA				NA			NA	NA			NA	NA				NA			NA	NA	10.01
	TCGA-G4-6321-01	WT	no variant	no variant	no variant	no variant	no variant	no variant	no variant	no variant	no variant	no variant	no variant			NA	NA				NA			NA	NA			NA	NA				NA			NA	NA	6.543
	TCGA-DC-6154-01	WT	no variant	no variant	no variant	no variant	no variant	no variant	no variant	no variant	no variant	no variant	no variant			NA	NA				NA			NA	NA			NA	NA				NA			NA	NA	5.343
	TCGA-DM-A28K-01	WT	no variant	no variant	no variant	no variant	no variant	no variant	no variant	no variant	no variant	no variant	no variant			NA	NA				NA			NA	NA			NA	NA				NA			NA	NA	5.355
	TCGA-CK-4950-01	WT	no variant	no variant	no variant	no variant	no variant	no variant	no variant	no variant	no variant	no variant	no variant			NA	NA				NA			NA	NA			NA	NA				NA			NA	NA	7.08
	TCGA-D5-6930-01	WT	no variant	no variant	no variant	no variant	no variant	no variant	no variant	no variant	no variant	no variant	no variant			NA	NA				NA			NA	NA			NA	NA				NA			NA	NA	9.151
	TCGA-DC-6160-01	WT	no variant	no variant	no variant	no variant	no variant	no variant	no variant	no variant	no variant	no variant	no variant			NA	NA				NA			NA	NA			NA	NA				NA			NA	NA	6.782
	TCGA-CM-5863-01	WT	no variant	no variant	no variant	no variant	no variant	no variant	no variant	no variant	no variant	no variant	no variant			NA	NA				NA			NA	NA			NA	NA				NA			NA	NA	6.857
	TCGA-AZ-6606-01	WT	no variant	no variant	no variant	no variant	no variant	no variant	no variant	no variant	no variant	no variant	no variant			NA	NA				NA			NA	NA			NA	NA				NA			NA	NA	6.402
	TCGA-T9-A92H-01	WT	no variant	no variant	no variant	no variant	no variant	no variant	no variant	no variant	no variant	no variant	no variant			NA	NA				NA			NA	NA			NA	NA				NA			NA	NA	8.761
	TCGA-A6-2675-01	WT	no variant	no variant	no variant	no variant	no variant	no variant	no variant	no variant	no variant	no variant	no variant			NA	NA				NA			NA	NA			NA	NA				NA			NA	NA	7.83
	TCGA-AF-4110-01	WT	no variant	no variant	no variant	no variant	no variant	no variant	no variant	no variant	no variant	no variant	no variant			NA	NA				NA			NA	NA			NA	NA				NA			NA	NA	7.697
	TCGA-AD-6899-01	WT	no variant	no variant	no variant	no variant	no variant	no variant	no variant	no variant	no variant	no variant	no variant			NA	NA				NA			NA	NA			NA	NA				NA			NA	NA	9.248
	TCGA-AG-3592-01	WT	no variant	no variant	no variant	no variant	no variant	no variant	no variant	no variant	no variant	no variant	no variant			NA	NA				NA			NA	NA			NA	NA				NA			NA	NA	7.797
	TCGA-D5-6537-01	WT	no variant	no variant	no variant	no variant	no variant	no variant	no variant	no variant	no variant	no variant	no variant			NA	NA				NA			NA	NA			NA	NA				NA			NA	NA	7.119
	TCGA-G4-6586-01	WT	no variant	no variant	no variant	no variant	no variant	no variant	no variant	no variant	no variant	no variant	no variant			NA	NA				NA			NA	NA			NA	NA				NA			NA	NA	10.06
	TCGA-AH-6643-01	WT	no variant	no variant	no variant	no variant	no variant	no variant	no variant	no variant	no variant	no variant	no variant			NA	NA				NA			NA	NA			NA	NA				NA			NA	NA	5.684
	TCGA-EI-7004-01	WT	no variant	no variant	no variant	no variant	no variant	no variant	no variant	no variant	no variant	no variant	no variant			NA	NA				NA			NA	NA			NA	NA				NA			NA	NA	7.93
	TCGA-A6-6654-01	WT	no variant	no variant	no variant	no variant	no variant	no variant	no variant	no variant	no variant	no variant	no variant			NA	NA				NA			NA	NA			NA	NA				NA			NA	NA	8.844
	TCGA-G5-6233-01	WT	no variant	no variant	no variant	no variant	no variant	no variant	no variant	no variant	no variant	no variant	no variant			NA	NA				NA			NA	NA			NA	NA				NA			NA	NA	5.907
	TCGA-A6-5667-01	WT	no variant	no variant	no variant	no variant	no variant	no variant	no variant	no variant	no variant	no variant	no variant			NA	NA				NA			NA	NA			NA	NA				NA			NA	NA	5.352
	TCGA-EI-6514-01	WT	no variant	no variant	no variant	no variant	no variant	no variant	no variant	no variant	no variant	no variant	no variant			NA	NA				NA			NA	NA			NA	NA				NA			NA	NA	5.141
	TCGA-CA-5254-01	WT	no variant	no variant	no variant	no variant	no variant	no variant	no variant	no variant	no variant	no variant	no variant			NA	NA				NA			NA	NA			NA	NA				NA			NA	NA	6.104
	TCGA-DM-A1D8-01	WT	no variant	no variant	no variant	no variant	no variant	no variant	no variant	no variant	no variant	no variant	no variant			NA	NA				NA			NA	NA			NA	NA				NA			NA	NA	6.799
	TCGA-EI-6512-01	WT	no variant	no variant	no variant	no variant	no variant	no variant	no variant	no variant	no variant	no variant	no variant			NA	NA				NA			NA	NA			NA	NA				NA			NA	NA	7.833
	TCGA-F4-6806-01	WT	no variant	no variant	no variant	no variant	no variant	no variant	no variant	no variant	no variant	no variant	no variant			NA	NA				NA			NA	NA			NA	NA				NA			NA	NA	8.342
	TCGA-F4-6704-01	WT	no variant	no variant	no variant	no variant	no variant	no variant	no variant	no variant	no variant	no variant	no variant			NA	NA				NA			NA	NA			NA	NA				NA			NA	NA	7
	TCGA-EI-6883-01	WT	no variant	no variant	no variant	no variant	no variant	no variant	no variant	no variant	no variant	no variant	no variant			NA	NA				NA			NA	NA			NA	NA				NA			NA	NA	10.11
	TCGA-DM-A285-01	WT	no variant	no variant	no variant	no variant	no variant	no variant	no variant	no variant	no variant	no variant	no variant			NA	NA				NA			NA	NA			NA	NA				NA			NA	NA	5.156
	TCGA-DM-A1DA-01	WT	no variant	no variant	no variant	no variant	no variant	no variant	no variant	no variant	no variant	no variant	no variant			NA	NA				NA			NA	NA			NA	NA				NA			NA	NA	4.672
	TCGA-CM-5864-01	WT	no variant	no variant	no variant	no variant	no variant	no variant	no variant	no variant	no variant	no variant	no variant			NA	NA				NA			NA	NA			NA	NA				NA			NA	NA	4.921
	TCGA-AF-6136-01	WT	no variant	no variant	no variant	no variant	no variant	no variant	no variant	no variant	no variant	no variant	no variant			NA	NA				NA			NA	NA			NA	NA				NA			NA	NA	6.079
	TCGA-A6-5662-01	WT	no variant	no variant	no variant	no variant	no variant	no variant	no variant	no variant	no variant	no variant	no variant			NA	NA				NA			NA	NA			NA	NA				NA			NA	NA	4.886
	TCGA-DM-A1DB-01	WT	no variant	no variant	no variant	no variant	no variant	no variant	no variant	no variant	no variant	no variant	no variant			NA	NA				NA			NA	NA			NA	NA				NA			NA	NA	6.438
	TCGA-CA-6716-01	WT	no variant	no variant	no variant	no variant	no variant	no variant	no variant	no variant	no variant	no variant	no variant			NA	NA				NA			NA	NA			NA	NA				NA			NA	NA	3.823
	TCGA-DM-A28M-01	WT	no variant	no variant	no variant	no variant	no variant	no variant	no variant	no variant	no variant	no variant	no variant			NA	NA				NA			NA	NA			NA	NA				NA			NA	NA	5.383
	TCGA-AZ-6599-01	WT	no variant	no variant	no variant	no variant	no variant	no variant	no variant	no variant	no variant	no variant	no variant			NA	NA				NA			NA	NA			NA	NA				NA			NA	NA	4.113
	TCGA-CK-4952-01	WT	no variant	no variant	no variant	no variant	no variant	no variant	no variant	no variant	no variant	no variant	no variant			NA	NA				NA			NA	NA			NA	NA				NA			NA	NA	6.064
	TCGA-CK-5915-01	WT	no variant	no variant	no variant	no variant	no variant	no variant	no variant	no variant	no variant	no variant	no variant			NA	NA				NA			NA	NA			NA	NA				NA			NA	NA	3.487
	TCGA-NH-A6GA-01	WT	no variant	no variant	no variant	no variant	no variant	no variant	no variant	no variant	no variant	no variant	no variant			NA	NA				NA			NA	NA			NA	NA				NA			NA	NA	6.471
	TCGA-G4-6304-01	WT	no variant	no variant	no variant	no variant	no variant	no variant	no variant	no variant	no variant	no variant	no variant			NA	NA				NA			NA	NA			NA	NA				NA			NA	NA	8.75
	TCGA-AF-2693-01	WT	no variant	no variant	no variant	no variant	no variant	no variant	no variant	no variant	no variant	no variant	no variant			NA	NA				NA			NA	NA			NA	NA				NA			NA	NA	7.065
	TCGA-F4-6460-01	WT	no variant	no variant	no variant	no variant	no variant	no variant	no variant	no variant	no variant	no variant	no variant			NA	NA				NA			NA	NA			NA	NA				NA			NA	NA	7.037
	TCGA-AD-5900-01	WT	no variant	no variant	no variant	no variant	no variant	no variant	no variant	no variant	no variant	no variant	no variant			NA	NA				NA			NA	NA			NA	NA				NA			NA	NA	9.764
	TCGA-AZ-5407-01	WT	no variant	no variant	no variant	no variant	no variant	no variant	no variant	no variant	no variant	no variant	no variant			NA	NA				NA			NA	NA			NA	NA				NA			NA	NA	6.666
	TCGA-CM-6170-01	WT	no variant	no variant	no variant	no variant	no variant	no variant	no variant	no variant	no variant	no variant	no variant			NA	NA				NA			NA	NA			NA	NA				NA			NA	NA	6.537
	TCGA-4N-A93T-01	WT	no variant	no variant	no variant	no variant	no variant	no variant	no variant	no variant	no variant	no variant	no variant			NA	NA				NA			NA	NA			NA	NA				NA			NA	NA	5.998
	TCGA-CM-6678-01	WT	no variant	no variant	no variant	no variant	no variant	no variant	no variant	no variant	no variant	no variant	no variant			NA	NA				NA			NA	NA			NA	NA				NA			NA	NA	3.941
	TCGA-A6-6781-01	WT	no variant	no variant	no variant	no variant	no variant	no variant	no variant	no variant	no variant	no variant	no variant			NA	NA				NA			NA	NA			NA	NA				NA			NA	NA	8.919
	TCGA-AA-3660-01	WT	no variant	no variant	no variant	no variant	no variant	no variant	no variant	no variant	no variant	no variant	no variant			NA	NA				NA			NA	NA			NA	NA				NA			NA	NA	6.893
	TCGA-A6-6652-01	WT	no variant	no variant	no variant	no variant	no variant	no variant	no variant	no variant	no variant	no variant	no variant			NA	NA				NA			NA	NA			NA	NA				NA			NA	NA	4.967
	TCGA-DM-A280-01	WT	no variant	no variant	no variant	no variant	no variant	no variant	no variant	no variant	no variant	no variant	no variant			NA	NA				NA			NA	NA			NA	NA				NA			NA	NA	4.729
	TCGA-D5-6532-01	WT	no variant	no variant	no variant	no variant	no variant	no variant	no variant	no variant	no variant	no variant	no variant			NA	NA				NA			NA	NA			NA	NA				NA			NA	NA	5.067
	TCGA-F5-6812-01	WT	no variant	no variant	no variant	no variant	no variant	no variant	no variant	no variant	no variant	no variant	no variant			NA	NA				NA			NA	NA			NA	NA				NA			NA	NA	8.091
	TCGA-CK-6751-01	WT	no variant	no variant	no variant	no variant	no variant	no variant	no variant	no variant	no variant	no variant	no variant			NA	NA				NA			NA	NA			NA	NA				NA			NA	NA	7.891
	TCGA-F4-6805-01	WT	no variant	no variant	no variant	no variant	no variant	no variant	no variant	no variant	no variant	no variant	no variant			NA	NA				NA			NA	NA			NA	NA				NA			NA	NA	7.951
	TCGA-CA-6719-01	WT	no variant	no variant	no variant	no variant	no variant	no variant	no variant	no variant	no variant	no variant	no variant			NA	NA				NA			NA	NA			NA	NA				NA			NA	NA	7.021
	TCGA-CM-6172-01	WT	no variant	no variant	no variant	no variant	no variant	no variant	no variant	no variant	no variant	no variant	no variant			NA	NA				NA			NA	NA			NA	NA				NA			NA	NA	7.267
	TCGA-A6-5666-01	WT	no variant	no variant	no variant	no variant	no variant	no variant	no variant	no variant	no variant	no variant	no variant			NA	NA				NA			NA	NA			NA	NA				NA			NA	NA	5.436
	TCGA-G4-6298-01	WT	no variant	no variant	no variant	no variant	no variant	no variant	no variant	no variant	no variant	no variant	no variant			NA	NA				NA			NA	NA			NA	NA				NA			NA	NA	3.601
	TCGA-D5-5539-01	WT	no variant	no variant	no variant	no variant	no variant	no variant	no variant	no variant	no variant	no variant	no variant			NA	NA				NA			NA	NA			NA	NA				NA			NA	NA	6.604
	TCGA-AZ-5403-01	WT	no variant	no variant	no variant	no variant	no variant	no variant	no variant	no variant	no variant	no variant	no variant			NA	NA				NA			NA	NA			NA	NA				NA			NA	NA	4.024
	TCGA-F4-6459-01	WT	no variant	no variant	no variant	no variant	no variant	no variant	no variant	no variant	no variant	no variant	no variant			NA	NA				NA			NA	NA			NA	NA				NA			NA	NA	6.53
	TCGA-A6-A567-01	WT	no variant	no variant	no variant	no variant	no variant	no variant	no variant	no variant	no variant	no variant	no variant			NA	NA				NA			NA	NA			NA	NA				NA			NA	NA	5.135
	TCGA-G4-6295-01	WT	no variant	no variant	no variant	no variant	no variant	no variant	no variant	no variant	no variant	no variant	no variant			NA	NA				NA			NA	NA			NA	NA				NA			NA	NA	8.879
	TCGA-F4-6808-01	WT	no variant	no variant	no variant	no variant	no variant	no variant	no variant	no variant	no variant	no variant	no variant			NA	NA				NA			NA	NA			NA	NA				NA			NA	NA	3.543
	TCGA-CM-5862-01	WT	no variant	no variant	no variant	no variant	no variant	no variant	no variant	no variant	no variant	no variant	no variant			NA	NA				NA			NA	NA			NA	NA				NA			NA	NA	2.094
	TCGA-CM-5348-01	WT	no variant	no variant	no variant	no variant	no variant	no variant	no variant	no variant	no variant	no variant	no variant			NA	NA				NA			NA	NA			NA	NA				NA			NA	NA	7.801
	TCGA-RU-A8FL-01	WT	no variant	no variant	no variant	no variant	no variant	no variant	no variant	no variant	no variant	no variant	no variant			NA	NA				NA			NA	NA			NA	NA				NA			NA	NA	3.517
	TCGA-F5-6464-01	WT	no variant	no variant	no variant	no variant	no variant	no variant	no variant	no variant	no variant	no variant	no variant			NA	NA				NA			NA	NA			NA	NA				NA			NA	NA	7.882
	TCGA-CK-6748-01	WT	no variant	no variant	no variant	no variant	no variant	no variant	no variant	no variant	no variant	no variant	no variant			NA	NA				NA			NA	NA			NA	NA				NA			NA	NA	6.675
	TCGA-A6-6653-01	WT	no variant	no variant	no variant	no variant	no variant	no variant	no variant	no variant	no variant	no variant	no variant			NA	NA				NA			NA	NA			NA	NA				NA			NA	NA	9.446
	TCGA-F4-6569-01	WT	no variant	no variant	no variant	no variant	no variant	no variant	no variant	no variant	no variant	no variant	no variant			NA	NA				NA			NA	NA			NA	NA				NA			NA	NA	7.447
	TCGA-DC-6681-01	WT	no variant	no variant	no variant	no variant	no variant	no variant	no variant	no variant	no variant	no variant	no variant			NA	NA				NA			NA	NA			NA	NA				NA			NA	NA	6.354
	TCGA-AD-6888-01	WT	no variant	no variant	no variant	no variant	no variant	no variant	no variant	no variant	no variant	no variant	no variant			NA	NA				NA			NA	NA			NA	NA				NA			NA	NA	6.905
	TCGA-D5-6536-01	WT	no variant	no variant	no variant	no variant	no variant	no variant	no variant	no variant	no variant	no variant	no variant			NA	NA				NA			NA	NA			NA	NA				NA			NA	NA	6.057
	TCGA-CK-6747-01	WT	no variant	no variant	no variant	no variant	no variant	no variant	no variant	no variant	no variant	no variant	no variant			NA	NA				NA			NA	NA			NA	NA				NA			NA	NA	8.352
	TCGA-CM-5868-01	WT	no variant	no variant	no variant	no variant	no variant	no variant	no variant	no variant	no variant	no variant	no variant			NA	NA				NA			NA	NA			NA	NA				NA			NA	NA	6.26
	TCGA-CM-6674-01	WT	no variant	no variant	no variant	no variant	no variant	no variant	no variant	no variant	no variant	no variant	no variant			NA	NA				NA			NA	NA			NA	NA				NA			NA	NA	7.925
	TCGA-EI-6513-01	WT	no variant	no variant	no variant	no variant	no variant	no variant	no variant	no variant	no variant	no variant	no variant			NA	NA				NA			NA	NA			NA	NA				NA			NA	NA	7.973
	TCGA-AZ-4615-01	WT	no variant	no variant	no variant	no variant	no variant	no variant	no variant	no variant	no variant	no variant	no variant			NA	NA				NA			NA	NA			NA	NA				NA			NA	NA	9.703
	TCGA-AZ-6607-01	WT	no variant	no variant	no variant	no variant	no variant	no variant	no variant	no variant	no variant	no variant	no variant			NA	NA				NA			NA	NA			NA	NA				NA			NA	NA	7.296
	TCGA-AU-3779-01	WT	no variant	no variant	no variant	no variant	no variant	no variant	no variant	no variant	no variant	no variant	no variant			NA	NA				NA			NA	NA			NA	NA				NA			NA	NA	7.093
	TCGA-A6-2685-01	WT	no variant	no variant	no variant	no variant	no variant	no variant	no variant	no variant	no variant	no variant	no variant			NA	NA				NA			NA	NA			NA	NA				NA			NA	NA	7.821
	TCGA-AA-3511-01	WT	no variant	no variant	no variant	no variant	no variant	no variant	no variant	no variant	no variant	no variant	no variant			NA	NA				NA			NA	NA			NA	NA				NA			NA	NA	5.985
	TCGA-AF-3911-01	WT	no variant	no variant	no variant	no variant	no variant	no variant	no variant	no variant	no variant	no variant	no variant			NA	NA				NA			NA	NA			NA	NA				NA			NA	NA	6.616
	TCGA-DC-4745-01	WT	no variant	no variant	no variant	no variant	no variant	no variant	no variant	no variant	no variant	no variant	no variant			NA	NA				NA			NA	NA			NA	NA				NA			NA	NA	6.67
	TCGA-F4-6856-01	WT	no variant	no variant	no variant	no variant	no variant	no variant	no variant	no variant	no variant	no variant	no variant			NA	NA				NA			NA	NA			NA	NA				NA			NA	NA	7.502
	TCGA-DM-A1D9-01	WT	no variant	no variant	no variant	no variant	no variant	no variant	no variant	no variant	no variant	no variant	no variant			NA	NA				NA			NA	NA			NA	NA				NA			NA	NA	4.763
	TCGA-D5-5540-01	WT	no variant	no variant	no variant	no variant	no variant	no variant	no variant	no variant	no variant	no variant	no variant			NA	NA				NA			NA	NA			NA	NA				NA			NA	NA	4.088
	TCGA-AZ-6598-01	WT	no variant	no variant	no variant	no variant	no variant	no variant	no variant	no variant	no variant	no variant	no variant			NA	NA				NA			NA	NA			NA	NA				NA			NA	NA	6.228
	TCGA-DM-A28C-01	WT	no variant	no variant	no variant	no variant	no variant	no variant	no variant	no variant	no variant	no variant	no variant			NA	NA				NA			NA	NA			NA	NA				NA			NA	NA	4.023
	TCGA-CM-5861-01	WT	no variant	no variant	no variant	no variant	no variant	no variant	no variant	no variant	no variant	no variant	no variant			NA	NA				NA			NA	NA			NA	NA				NA			NA	NA	7.889
	TCGA-AA-3492-01	WT	no variant	no variant	no variant	no variant	no variant	no variant	no variant	no variant	no variant	no variant	no variant			NA	NA				NA			NA	NA			NA	NA				NA			NA	NA	7.567
	TCGA-A6-2684-01	WT	no variant	no variant	no variant	no variant	no variant	no variant	no variant	no variant	no variant	no variant	no variant			NA	NA				NA			NA	NA			NA	NA				NA			NA	NA	8.307
	TCGA-DC-4749-01	WT	no variant	no variant	no variant	no variant	no variant	no variant	no variant	no variant	no variant	no variant	no variant			NA	NA				NA			NA	NA			NA	NA				NA			NA	NA	7.09
	TCGA-EI-6509-01	WT	no variant	no variant	no variant	no variant	no variant	no variant	no variant	no variant	no variant	no variant	no variant			NA	NA				NA			NA	NA			NA	NA				NA			NA	NA	4.966
	TCGA-EI-7002-01	WT	no variant	no variant	no variant	no variant	no variant	no variant	no variant	no variant	no variant	no variant	no variant			NA	NA				NA			NA	NA			NA	NA				NA			NA	NA	6.983
	TCGA-AZ-4616-01	WT	no variant	no variant	no variant	no variant	no variant	no variant	no variant	no variant	no variant	no variant	no variant			NA	NA				NA			NA	NA			NA	NA				NA			NA	NA	8.757
	TCGA-AG-4021-01	WT	no variant	no variant	no variant	no variant	no variant	no variant	no variant	no variant	no variant	no variant	no variant			NA	NA				NA			NA	NA			NA	NA				NA			NA	NA	5.558
	TCGA-CM-6675-01	WT	no variant	no variant	no variant	no variant	no variant	no variant	no variant	no variant	no variant	no variant	no variant			NA	NA				NA			NA	NA			NA	NA				NA			NA	NA	8.397
	TCGA-A6-2671-01	WT	no variant	no variant	no variant	no variant	no variant	no variant	no variant	no variant	no variant	no variant	no variant			NA	NA				NA			NA	NA			NA	NA				NA			NA	NA	NA
	TCGA-A6-2674-01	WT	no variant	no variant	no variant	no variant	no variant	no variant	no variant	no variant	no variant	no variant	no variant			NA	NA				NA			NA	NA			NA	NA				NA			NA	NA	NA
	TCGA-A6-2681-01	WT	no variant	no variant	no variant	no variant	no variant	no variant	no variant	no variant	no variant	no variant	no variant			NA	NA				NA			NA	NA			NA	NA				NA			NA	NA	NA
	TCGA-A6-3810-01	WT	no variant	no variant	no variant	no variant	no variant	no variant	no variant	no variant	no variant	no variant	no variant			NA	NA				NA			NA	NA			NA	NA				NA			NA	NA	NA
	TCGA-A6-4107-01	WT	no variant	no variant	no variant	no variant	no variant	no variant	no variant	no variant	no variant	no variant	no variant			NA	NA				NA			NA	NA			NA	NA				NA			NA	NA	NA
	TCGA-AA-3510-01	WT	no variant	no variant	no variant	no variant	no variant	no variant	no variant	no variant	no variant	no variant	no variant			NA	NA				NA			NA	NA			NA	NA				NA			NA	NA	NA
	TCGA-AA-3522-01	WT	no variant	no variant	no variant	no variant	no variant	no variant	no variant	no variant	no variant	no variant	no variant			NA	NA				NA			NA	NA			NA	NA				NA			NA	NA	NA
	TCGA-AA-3556-01	WT	no variant	no variant	no variant	no variant	no variant	no variant	no variant	no variant	no variant	no variant	no variant			NA	NA				NA			NA	NA			NA	NA				NA			NA	NA	NA
	TCGA-AA-3947-01	WT	no variant	no variant	no variant	no variant	no variant	no variant	no variant	no variant	no variant	no variant	no variant			NA	NA				NA			NA	NA			NA	NA				NA			NA	NA	NA
	TCGA-AA-A00N-01	WT	no variant	no variant	no variant	no variant	no variant	no variant	no variant	no variant	no variant	no variant	no variant			NA	NA				NA			NA	NA			NA	NA				NA			NA	NA	NA
	TCGA-AZ-4308-01	WT	no variant	no variant	no variant	no variant	no variant	no variant	no variant	no variant	no variant	no variant	no variant			NA	NA				NA			NA	NA			NA	NA				NA			NA	NA	NA
	TCGA-AZ-4681-01	WT	no variant	no variant	no variant	no variant	no variant	no variant	no variant	no variant	no variant	no variant	no variant			NA	NA				NA			NA	NA			NA	NA				NA			NA	NA	NA
	TCGA-CM-4746-01	WT	no variant	no variant	no variant	no variant	no variant	no variant	no variant	no variant	no variant	no variant	no variant			NA	NA				NA			NA	NA			NA	NA				NA			NA	NA	NA
	TCGA-CM-4748-01	WT	no variant	no variant	no variant	no variant	no variant	no variant	no variant	no variant	no variant	no variant	no variant			NA	NA				NA			NA	NA			NA	NA				NA			NA	NA	NA
	TCGA-CM-4752-01	WT	no variant	no variant	no variant	no variant	no variant	no variant	no variant	no variant	no variant	no variant	no variant			NA	NA				NA			NA	NA			NA	NA				NA			NA	NA	NA
	TCGA-CM-5341-01	WT	no variant	no variant	no variant	no variant	no variant	no variant	no variant	no variant	no variant	no variant	no variant			NA	NA				NA			NA	NA			NA	NA				NA			NA	NA	NA
