# Supplementary material for: Global and context-specific transcriptional consequences of oncogenic Fbw7 mutations
Source: eLife. 2022 Feb 28;11:e74338. doi: 10.7554/eLife.74338 (PMC8926403; doi:10.7554/eLife.74338)
Supplement: Figure 5—source data 3. [file elife-74338-fig5-data3.xlsx]

## Sheet: DepMap_Fbw7_CIITA_Colorectal
DepMap ID	FBXW7 Mutation (one hot encoding) Mutation Public 21Q1	CIITA log2(TPM+1) Expression Public 21Q1	filter	Cell Line Name	Primary Disease	Lineage	all Primary Disease
ACH-000003	0	0.659925	colorectal_adenocarcinoma	CACO2	Colon/Colorectal Cancer	Colorectal	Colon/Colorectal Cancer
ACH-000007	0	0.443607	colorectal_adenocarcinoma	LS513	Colon/Colorectal Cancer	Colorectal	Colon/Colorectal Cancer
ACH-000009	0	0.526069	colorectal_adenocarcinoma	C2BBE1	Colon/Colorectal Cancer	Colorectal	Colon/Colorectal Cancer
ACH-000089	1	0.464668	colorectal_adenocarcinoma	NCIH684	Colon/Colorectal Cancer	Colorectal	Colon/Colorectal Cancer
ACH-000202	0	1.30451	colorectal_adenocarcinoma	COLO320	Colon/Colorectal Cancer	Colorectal	Colon/Colorectal Cancer
ACH-000236	0	2.31034	colorectal_adenocarcinoma	SW1417	Colon/Colorectal Cancer	Colorectal	Colon/Colorectal Cancer
ACH-000249	1	0.367371	colorectal_adenocarcinoma	CL11	Colon/Colorectal Cancer	Colorectal	Colon/Colorectal Cancer
ACH-000252	0	0.790772	colorectal_adenocarcinoma	LS1034	Colon/Colorectal Cancer	Colorectal	Colon/Colorectal Cancer
ACH-000253	0	0.831877	colorectal_adenocarcinoma	COLO201	Colon/Colorectal Cancer	Colorectal	Colon/Colorectal Cancer
ACH-000286	0	0.575312	colorectal_adenocarcinoma	SNU1033	Colon/Colorectal Cancer	Colorectal	Colon/Colorectal Cancer
ACH-000296	0	0.400538	colorectal_adenocarcinoma	OUMS23	Colon/Colorectal Cancer	Colorectal	Colon/Colorectal Cancer
ACH-000342	0	0.650765	colorectal_adenocarcinoma	CL14	Colon/Colorectal Cancer	Colorectal	Colon/Colorectal Cancer
ACH-000350	0	0.669027	colorectal_adenocarcinoma	COLO678	Colon/Colorectal Cancer	Colorectal	Colon/Colorectal Cancer
ACH-000381	0	0.526069	colorectal_adenocarcinoma	T84	Colon/Colorectal Cancer	Colorectal	Colon/Colorectal Cancer
ACH-000400	0	0.286881	colorectal_adenocarcinoma	SKCO1	Colon/Colorectal Cancer	Colorectal	Colon/Colorectal Cancer
ACH-000403	0	1.18903	colorectal_adenocarcinoma	NCIH747	Colon/Colorectal Cancer	Colorectal	Colon/Colorectal Cancer
ACH-000412	1	2.62527	colorectal_adenocarcinoma	SNU1197	Colon/Colorectal Cancer	Colorectal	Colon/Colorectal Cancer
ACH-000421	1	2.58976	colorectal_adenocarcinoma	SW837	Colon/Colorectal Cancer	Colorectal	Colon/Colorectal Cancer
ACH-000467	0	1	colorectal_adenocarcinoma	HCC56	Colon/Colorectal Cancer	Colorectal	Colon/Colorectal Cancer
ACH-000470	1	0.214125	colorectal_adenocarcinoma	SW1463	Colon/Colorectal Cancer	Colorectal	Colon/Colorectal Cancer
ACH-000489	1	0.941106	colorectal_adenocarcinoma	SW1116	Colon/Colorectal Cancer	Colorectal	Colon/Colorectal Cancer
ACH-000491	0	0.604071	colorectal_adenocarcinoma	NCIH716	Colon/Colorectal Cancer	Colorectal	Colon/Colorectal Cancer
ACH-000501	0	0.62293	colorectal_adenocarcinoma	LS123	Colon/Colorectal Cancer	Colorectal	Colon/Colorectal Cancer
ACH-000532	0	0.286881	colorectal_adenocarcinoma	SNU61	Colon/Colorectal Cancer	Colorectal	Colon/Colorectal Cancer
ACH-000552	0	0.815575	colorectal_adenocarcinoma	HT29	Colon/Colorectal Cancer	Colorectal	Colon/Colorectal Cancer
ACH-000565	1	1.38405	colorectal_adenocarcinoma	RCM1	Colon/Colorectal Cancer	Colorectal	Colon/Colorectal Cancer
ACH-000651	0	0.389567	colorectal_adenocarcinoma	SW620	Colon/Colorectal Cancer	Colorectal	Colon/Colorectal Cancer
ACH-000680	0	0.344828	colorectal_adenocarcinoma	SW948	Colon/Colorectal Cancer	Colorectal	Colon/Colorectal Cancer
ACH-000683	0	0.137504	colorectal_adenocarcinoma	SNU503	Colon/Colorectal Cancer	Colorectal	Colon/Colorectal Cancer
ACH-000708	0	0.250962	colorectal_adenocarcinoma	SNU283	Colon/Colorectal Cancer	Colorectal	Colon/Colorectal Cancer
ACH-000722	0	0.731183	colorectal_adenocarcinoma	SNUC1	Colon/Colorectal Cancer	Colorectal	Colon/Colorectal Cancer
ACH-000798	0	0.0703893	colorectal_adenocarcinoma	CL40	Colon/Colorectal Cancer	Colorectal	Colon/Colorectal Cancer
ACH-000820	0	0.871844	colorectal_adenocarcinoma	SW403	Colon/Colorectal Cancer	Colorectal	Colon/Colorectal Cancer
ACH-000842	0	0.356144	colorectal_adenocarcinoma	SW480	Colon/Colorectal Cancer	Colorectal	Colon/Colorectal Cancer
ACH-000895	0	0.526069	colorectal_adenocarcinoma	CL34	Colon/Colorectal Cancer	Colorectal	Colon/Colorectal Cancer
ACH-000926	0	0.454176	colorectal_adenocarcinoma	HT55	Colon/Colorectal Cancer	Colorectal	Colon/Colorectal Cancer
ACH-000935	0	0.871844	colorectal_adenocarcinoma	MDST8	Colon/Colorectal Cancer	Colorectal	Colon/Colorectal Cancer
ACH-000943	0	1.08406	colorectal_adenocarcinoma	RKO	Colon/Colorectal Cancer	Colorectal	Colon/Colorectal Cancer
ACH-000950	1	0.495695	colorectal_adenocarcinoma	LOVO	Colon/Colorectal Cancer	Colorectal	Colon/Colorectal Cancer
ACH-000955	1	2.55827	colorectal_adenocarcinoma	SNU407	Colon/Colorectal Cancer	Colorectal	Colon/Colorectal Cancer
ACH-000957	0	0.933573	colorectal_adenocarcinoma	LS180	Colon/Colorectal Cancer	Colorectal	Colon/Colorectal Cancer
ACH-000958	1	1.1177	colorectal_adenocarcinoma	SW48	Colon/Colorectal Cancer	Colorectal	Colon/Colorectal Cancer
ACH-000959	1	0.659925	colorectal_adenocarcinoma	SNUC4	Colon/Colorectal Cancer	Colorectal	Colon/Colorectal Cancer
ACH-000963	1	0.400538	colorectal_adenocarcinoma	CCK81	Colon/Colorectal Cancer	Colorectal	Colon/Colorectal Cancer
ACH-000967	1	0.925999	colorectal_adenocarcinoma	SNUC2A	Colon/Colorectal Cancer	Colorectal	Colon/Colorectal Cancer
ACH-000969	0	0.321928	colorectal_adenocarcinoma	KM12	Colon/Colorectal Cancer	Colorectal	Colon/Colorectal Cancer
ACH-000970	1	1.31615	colorectal_adenocarcinoma	SNUC5	Colon/Colorectal Cancer	Colorectal	Colon/Colorectal Cancer
ACH-000971	0	0.475085	colorectal_adenocarcinoma	HCT116	Colon/Colorectal Cancer	Colorectal	Colon/Colorectal Cancer
ACH-000982	1	0.773996	colorectal_adenocarcinoma	GP2D	Colon/Colorectal Cancer	Colorectal	Colon/Colorectal Cancer
ACH-000985	1	0.411426	colorectal_adenocarcinoma	LS411N	Colon/Colorectal Cancer	Colorectal	Colon/Colorectal Cancer
ACH-000986	1	0.286881	colorectal_adenocarcinoma	HT115	Colon/Colorectal Cancer	Colorectal	Colon/Colorectal Cancer
ACH-000989	1	0.411426	colorectal_adenocarcinoma	SNU175	Colon/Colorectal Cancer	Colorectal	Colon/Colorectal Cancer
ACH-000991	1	0.799087	colorectal_adenocarcinoma	SNU81	Colon/Colorectal Cancer	Colorectal	Colon/Colorectal Cancer
ACH-000997	0	0.879706	colorectal_adenocarcinoma	HCT15	Colon/Colorectal Cancer	Colorectal	Colon/Colorectal Cancer
ACH-000998	0	0.344828	colorectal_adenocarcinoma	CW2	Colon/Colorectal Cancer	Colorectal	Colon/Colorectal Cancer
ACH-000999	1	0.790772	colorectal_adenocarcinoma	SNU1040	Colon/Colorectal Cancer	Colorectal	Colon/Colorectal Cancer
ACH-001061	0	0.201634	colorectal_adenocarcinoma	DLD1	Colon/Colorectal Cancer	Colorectal	Colon/Colorectal Cancer
ACH-001345	1	0.201634	colorectal_adenocarcinoma	GP5D	Colon/Colorectal Cancer	Colorectal	Colon/Colorectal Cancer
ACH-001399	0	0.879706	colorectal_adenocarcinoma	SW626	Colon/Colorectal Cancer	Colorectal	Colon/Colorectal Cancer
ACH-001454	0	0.15056	colorectal_adenocarcinoma	C10	Colon/Colorectal Cancer	Colorectal	Colon/Colorectal Cancer
ACH-001456	0	0.15056	colorectal_adenocarcinoma	C125PM	Colon/Colorectal Cancer	Colorectal	Colon/Colorectal Cancer
ACH-001458	0	0.0976108	colorectal_adenocarcinoma	C75	Colon/Colorectal Cancer	Colorectal	Colon/Colorectal Cancer
ACH-001459	0	0.0565835	colorectal_adenocarcinoma	C80	Colon/Colorectal Cancer	Colorectal	Colon/Colorectal Cancer
ACH-001460	0	0.124328	colorectal_adenocarcinoma	C84	Colon/Colorectal Cancer	Colorectal	Colon/Colorectal Cancer
ACH-001461	0	0.176323	colorectal_adenocarcinoma	C99	Colon/Colorectal Cancer	Colorectal	Colon/Colorectal Cancer
ACH-001786	1	0.594549	colorectal_adenocarcinoma	SNU1544	Colon/Colorectal Cancer	Colorectal	Colon/Colorectal Cancer
ACH-002022	0	0.111031	colorectal_adenocarcinoma	PMFKO14	Colon/Colorectal Cancer	Colorectal	Colon/Colorectal Cancer
ACH-002023	0	0.422233	colorectal_adenocarcinoma	TGBC18TKB	Colon/Colorectal Cancer	Colorectal	Colon/Colorectal Cancer
ACH-002024	0	0.0285692	colorectal_adenocarcinoma	ECC4	Colon/Colorectal Cancer	Colorectal	Colon/Colorectal Cancer
ACH-002025	1	0.226509	colorectal_adenocarcinoma	TT1TKB	Colon/Colorectal Cancer	Colorectal	Colon/Colorectal Cancer
