# Supplementary material for: Global and context-specific transcriptional consequences of oncogenic Fbw7 mutations
Source: eLife. 2022 Feb 28;11:e74338. doi: 10.7554/eLife.74338 (PMC8926403; doi:10.7554/eLife.74338)
Supplement: Figure 5—source data 4. [file elife-74338-fig5-data4.xlsx]

## Sheet: Sheet1
Replicate 1	DNA Sample ID	CT raw		Average	Delta Ct	Delta Delta Ct	Min DDCt	Fold change	CT raw		Average
DRA	Hct WT (1)	28.5528	28.5342	28.5435	12.3886	0	0	1	16.0232	16.2866	16.1549
DRA	Hct Fbw7-/- (2)	24.4796	24.434	24.4568	7.83061	-4.55797	4.55797	23.5552	16.6328	16.6196	16.6262
DRB	Hct WT (1)	27.6511	27.5992	27.6251	11.4702	0	0	1	16.0232	16.2866	16.1549
DRB	Hct Fbw7-/- (2)	24.8066	24.7759	24.7912	8.16502	-3.3052	3.3052	9.88472	16.6328	16.6196	16.6262
DPA	Hct WT (1)	30.0135	30.5165	30.265	14.1101	0	0	1	16.0232	16.2866	16.1549
DPA	Hct Fbw7-/- (2)	26.9584	26.9591	26.9587	10.3325	-3.77758	3.77758	13.714	16.6328	16.6196	16.6262
DPB	Hct WT (1)	31.4772	31.4776	31.4774	15.3225	0	0	1	16.0232	16.2866	16.1549
DPB	Hct Fbw7-/- (2)	29.7008	29.4665	29.5837	12.9574	-2.36508	2.36508	5.15181	16.6328	16.6196	16.6262
Replicate 2
DRA	Hct WT (5)	27.9669	27.9719	27.9694	11.8219	0	0	1	16.1463	16.1488	16.1475
DRA	Hct Fbw7-/- (6)	24.4319	24.3673	24.3996	7.82921	-3.99266	3.99266	15.9188	16.5896	16.5512	16.5704
DRB	Hct WT (5)	27.0606	27.1208	27.0907	10.9431	0	0	1	16.1463	16.1488	16.1475
DRB	Hct Fbw7-/- (6)	24.5988	24.6326	24.6157	8.04534	-2.8978	2.8978	7.4529	16.5896	16.5512	16.5704
DPA	Hct WT (5)	28.9581	29.0041	28.9811	12.8335	0	0	1	16.1463	16.1488	16.1475
DPA	Hct Fbw7-/- (6)	26.5069	26.5615	26.5342	9.96381	-2.86973	2.86973	7.30931	16.5896	16.5512	16.5704
DPB	Hct WT (5)	32.0803	32.1433	32.1118	15.9642	0	0	1	16.1463	16.1488	16.1475
DPB	Hct Fbw7-/- (6)	29.986	29.9904	29.9882	13.4178	-2.54641	2.54641	5.84179	16.5896	16.5512	16.5704
Replicate 3
DRA	Hct WT (3)	28.4662	28.6064	28.5363	12.3437	0	0	1	16.2091	16.1761	16.1926
DRA	Hct Fbw7-/-2 (3)	24.4583	24.4623	24.4603	7.95819	-4.38552	4.38552	20.9012	16.5109	16.4933	16.5021
DRB	Hct WT (3)	26.9766	26.8396	26.9081	10.7155	0	0	1	16.2091	16.1761	16.1926
DRB	Hct Fbw7-/- (3)	24.6138	24.5077	24.5607	8.0586	-2.65693	2.65693	6.30689	16.5109	16.4933	16.5021
DPA	Hct WT (3)	28.9563	29.2958	29.1261	12.9335	0	0	1	16.2091	16.1761	16.1926
DPA	Hct Fbw7-/- (3)	26.8227	26.7989	26.8108	10.3087	-2.6248	2.6248	6.16799	16.5109	16.4933	16.5021
DPB	Hct WT (3)	31.1609	30.9528	31.0569	14.8643	0	0	1	16.2091	16.1761	16.1926
DPB	Hct Fbw7-/- (3)	30.0059	29.9816	29.9937	13.4916	-1.37265	1.37265	2.58946	16.5109	16.4933	16.5021
	P value	Mean of Fbw7-/-	Mean of WT	Difference	SE of difference	t ratio	df	q value
DRA	0.001031	20.13	1	19.13	2.239	8.542	4	0.002082
DRB	0.002833	7.88	1	6.88	1.053	6.535	4	0.002861
DPA	0.026383	9.063	1	8.063	2.347	3.436	4	0.013324
DPB	0.023432	4.527	1	3.527	0.9886	3.567	4	0.013324
