# Supplementary material for: Global and context-specific transcriptional consequences of oncogenic Fbw7 mutations
Source: eLife. 2022 Feb 28;11:e74338. doi: 10.7554/eLife.74338 (PMC8926403; doi:10.7554/eLife.74338)
Supplement: Figure 6—source data 1. — This Excel file contains the differential analysis output of U5-NSC RNA-Seq data from control (Ctrl23, Ctrl4.1, and Ctrl4.2) and Fbw7−/− (Fb23, Fb4.1, and Fb4.2) cells. DE=0, not differentially expressed (DE) in the mutant compared to WT; DE=1, DE in the mutant compared to WT. NSC, neural stem cell; WT, wild-type. [file elife-74338-fig6-data1.xlsx]

## Sheet: Sheet1
Geneid	Genename	log2FC	PValue	FDR	is.DE	CPM.TMMnormalized.NSC_Ctrl23_0213_030320	CPM.TMMnormalized.NSC_Ctrl4.1_030320	CPM.TMMnormalized.NSC_Ctrl4.2_030320	CPM.TMMnormalized.NSC_Fb23_021320_030320	CPM.TMMnormalized.NSC_Fb4.1_030320	CPM.TMMnormalized.NSC_Fb4.2_030320	FPKM.TMMnormalized.NSC_Ctrl23_0213_030320	FPKM.TMMnormalized.NSC_Ctrl4.1_030320	FPKM.TMMnormalized.NSC_Ctrl4.2_030320	FPKM.TMMnormalized.NSC_Fb23_021320_030320	FPKM.TMMnormalized.NSC_Fb4.1_030320	FPKM.TMMnormalized.NSC_Fb4.2_030320	gene_type	hgnc_id	havana_gene
ENSG00000227232.5_2	WASH7P	0.107079	0.616475	0.724264	0	1.60668	1.50291	1.56369	2.22018	1.44527	1.35824	1.18925	1.11244	1.15743	1.64336	1.06978	1.00536	unprocessed_pseudogene	HGNC:38034	OTTHUMG00000000958.1_2
ENSG00000225630.1_4	MTND2P28	0.423709	0.243198	0.37013	0	0.685778	0.760734	0.605298	0.467407	1.2801	1.01361	0.656875	0.728672	0.579787	0.447708	1.22615	0.970891	unprocessed_pseudogene	HGNC:42129	OTTHUMG00000002336.1_4
ENSG00000237973.1_4	MTCO1P12	0.329474	0.00508026	0.0229249	0	389.718	357.229	363.515	457.066	415.289	522.982	252.571	231.516	235.59	296.219	269.144	338.939	unprocessed_pseudogene	HGNC:52014	OTTHUMG00000002333.2_4
ENSG00000229344.1_4	MTCO2P12	0.596304	0.0456729	0.109674	0	0.509435	0.500971	0.57167	0.545308	0.929104	0.932521	0.746972	0.734561	0.838226	0.799572	1.36232	1.36733	unprocessed_pseudogene	HGNC:52028	OTTHUMG00000002334.1_4
ENSG00000248527.1_4	MTATP6P1	0.332831	0.129593	0.233486	0	0.901308	0.779288	0.924761	0.934814	1.34204	1.01361	1.32351	1.14433	1.35795	1.37271	1.97069	1.48841	unprocessed_pseudogene	HGNC:44575	OTTHUMG00000002335.2_4
ENSG00000198744.5_4	MTCO3P12	0.317232	0.00291619	0.0155876	0	112.566	110.139	110.988	145.675	121.836	148.23	205.787	201.352	202.903	266.317	222.736	270.988	unprocessed_pseudogene	HGNC:52042	OTTHUMG00000002337.2_4
ENSG00000228327.3_6	AL669831.1	0.207374	0.375083	0.508983	0	1.33237	1.63279	1.05927	1.86963	1.21816	1.54069	0.207147	0.253855	0.164688	0.290676	0.18939	0.239535	transcribed_unprocessed_pseudogene	NA	OTTHUMG00000002406.2_6
ENSG00000228794.9_6	LINC01128	0.197278	0.0365143	0.0930415	0	12.0893	13.6004	12.5936	15.0154	15.3199	13.5621	0.63715	0.716793	0.663727	0.79137	0.807415	0.714773	lncRNA	HGNC:49377	OTTHUMG00000002468.25_6
ENSG00000223764.2_6	LINC02593	-1.19699	0.0027563	0.0150087	-1	3.85995	3.98921	3.7663	2.49284	0.908457	1.64205	0.92966	0.960793	0.907104	0.600394	0.2188	0.395484	lncRNA	HGNC:53933	OTTHUMG00000040718.2_6
ENSG00000187634.12_7	SAMD11	-1.19044	9.07461e-05	0.00149131	-1	5.50582	6.49407	7.63348	3.40818	2.35373	2.83811	1.31939	1.55621	1.82925	0.816721	0.564038	0.680112	protein_coding	HGNC:28706	OTTHUMG00000040719.11_7
ENSG00000188976.11_3	NOC2L	0.208489	0.00269262	0.0147915	0	103.748	109.379	109.895	127.349	124.5	121.41	18.7271	19.7434	19.8367	22.9872	22.4729	21.9152	protein_coding	HGNC:24517	OTTHUMG00000040720.2_3
ENSG00000187961.14_5	KLHL17	0.304578	0.119913	0.220853	0	24.2569	22.4509	23.4049	37.6652	21.1629	27.7121	7.1302	6.59933	6.87973	11.0715	6.22073	8.14583	protein_coding	HGNC:24023	OTTHUMG00000040721.8_5
ENSG00000187583.10_3	PLEKHN1	0.97275	0.000169071	0.00227083	1	1.39115	1.20604	1.36192	2.90182	2.60149	2.27049	0.491052	0.425712	0.480734	1.02429	0.918281	0.801443	protein_coding	HGNC:25284	OTTHUMG00000040756.4_3
ENSG00000272512.1_6	AL645608.7	1.57487	0.000131834	0.00191142	1	0.43106	0.482416	0.403532	1.67487	1.05298	1.19606	0.206644	0.231264	0.193448	0.802912	0.504786	0.573375	lncRNA	NA	OTTHUMG00000185581.1_6
ENSG00000188290.10_3	HES4	0.957699	4.07471e-06	0.00021024	1	7.95502	9.05459	9.483	18.5405	16.3316	16.6232	7.1154	8.09891	8.48211	16.5836	14.6079	14.8687	protein_coding	HGNC:24149	OTTHUMG00000040758.2_3
ENSG00000187608.10_7	ISG15	-0.0922067	0.496218	0.621375	0	16.2627	19.5008	22.6146	16.8072	20.8326	17.1908	18.7575	22.4922	26.0837	19.3854	24.0283	19.8279	protein_coding	HGNC:4053	OTTHUMG00000040777.4_7
ENSG00000188157.15_5	AGRN	0.311512	0.00165793	0.0105648	0	568.353	601.221	643.953	786.354	717.041	747.233	52.816	55.8703	59.8414	73.0744	66.6333	69.439	protein_coding	HGNC:329	OTTHUMG00000040778.7_5
ENSG00000217801.10_6	AL390719.1	0.368981	0.00991745	0.0363153	0	7.62193	6.62395	6.50695	9.46499	7.80447	9.50766	3.4598	3.00679	2.95368	4.29641	3.54266	4.31578	transcribed_unprocessed_pseudogene	NA	OTTHUMG00000000629.5_6
ENSG00000131591.17_7	C1orf159	0.187359	0.0701848	0.149336	0	21.3179	20.2986	21.3031	27.2654	21.6171	22.7454	3.37202	3.21079	3.36968	4.31278	3.41935	3.59782	protein_coding	HGNC:26062	OTTHUMG00000000745.9_7
ENSG00000078808.17_4	SDF4	0.0838766	0.181754	0.298481	0	195.858	200.815	215.906	212.203	224.12	212.959	41.2767	42.3214	45.5019	44.7213	47.233	44.8808	protein_coding	HGNC:24188	OTTHUMG00000001812.7_4
ENSG00000176022.7_6	B3GALT6	-0.0188969	0.807988	0.872709	0	52.0603	55.0326	61.6059	54.0634	59.2562	53.2348	18.5598	19.6195	21.9629	19.2739	21.1252	18.9785	protein_coding	HGNC:17978	OTTHUMG00000001813.3_6
ENSG00000160087.20_5	UBE2J2	0.252437	0.0016945	0.0107015	0	72.2222	67.4641	74.9056	86.2366	86.6957	82.7106	15.3273	14.3175	15.8968	18.3015	18.3989	17.5532	protein_coding	HGNC:19268	OTTHUMG00000001911.9_5
ENSG00000162572.20_3	SCNN1D	0.562319	0.0267939	0.0743491	0	3.21336	2.57907	2.63977	5.39465	3.01443	4.0139	0.79835	0.640763	0.655844	1.34029	0.748926	0.997241	protein_coding	HGNC:10601	OTTHUMG00000002081.7_3
ENSG00000131584.19_3	ACAP3	0.306875	0.035297	0.0908539	0	99.9276	91.1396	94.8132	143.494	98.7741	111.315	11.4767	10.4674	10.8893	16.4803	11.3442	12.7845	protein_coding	HGNC:16754	OTTHUMG00000002235.5_3
ENSG00000169972.12_3	PUSL1	0.155885	0.101126	0.194828	0	14.3034	15.2518	16.6289	16.7682	18.644	16.0759	5.81674	6.20243	6.76246	6.81912	7.58195	6.53756	protein_coding	HGNC:26914	OTTHUMG00000003361.4_3
ENSG00000127054.20_3	INTS11	0.199147	0.0175863	0.0544144	0	65.8151	70.4142	73.241	86.7235	77.4253	76.3451	8.0067	8.56621	8.9101	10.5503	9.41914	9.28773	protein_coding	HGNC:26052	OTTHUMG00000003330.13_3
ENSG00000240731.1_7	AL139287.1	0.544638	0.0432799	0.105371	0	0.744559	0.649407	0.907947	1.34379	0.846517	1.17579	1.92891	1.6824	2.35219	3.48133	2.19305	3.04608	lncRNA	NA	OTTHUMG00000003331.1_7
ENSG00000224051.7_3	CPTP	0.0431198	0.585905	0.697829	0	16.4587	16.9217	16.4776	16.0087	18.8298	16.5421	6.44175	6.62297	6.44914	6.26563	7.3698	6.47441	protein_coding	HGNC:28116	OTTHUMG00000003171.4_3
ENSG00000107404.20_5	DVL1	0.216084	0.00478052	0.0219564	0	59.5843	59.8939	63.2873	74.8825	69.2079	68.216	15.3489	15.4286	16.3027	19.2897	17.8279	17.5724	protein_coding	HGNC:3084	OTTHUMG00000003069.5_5
ENSG00000175756.13_2	AURKAIP1	0.0747786	0.297239	0.428075	0	67.4609	71.5275	74.1154	74.3956	80.5843	69.4931	40.42	42.8565	44.407	44.575	48.283	41.6376	protein_coding	HGNC:24114	OTTHUMG00000001413.3_2
ENSG00000221978.12_5	CCNL2	0.192296	0.316005	0.447976	0	206.733	179.477	166.692	271.68	154.355	205.58	30.1491	26.1743	24.3098	39.6209	22.5106	29.9811	protein_coding	HGNC:20570	OTTHUMG00000002917.7_5
ENSG00000224870.7_7	MRPL20-AS1	0.00481339	0.948969	0.966644	0	22.7286	24.0466	25.7083	23.4288	26.0356	23.2928	8.99431	9.51587	10.1735	9.27138	10.3029	9.21755	lncRNA	HGNC:27125	OTTHUMG00000002908.6_7
ENSG00000242485.6_3	MRPL20	-0.0240615	0.673389	0.77061	0	63.4442	65.4788	68.7854	62.7689	67.5768	64.121	22.9289	23.6642	24.8592	22.6848	24.4224	23.1735	protein_coding	HGNC:14478	OTTHUMG00000002916.4_3
ENSG00000272455.1_7	AL391244.2	0.26851	0.223445	0.347314	0	0.764152	0.946278	0.840691	1.01271	0.82587	1.2366	0.501741	0.621325	0.551997	0.664947	0.542265	0.811953	lncRNA	NA	OTTHUMG00000185586.1_7
ENSG00000179403.12_5	VWA1	-0.442144	0.00942916	0.0351007	0	8.67999	6.77238	7.58304	6.48527	5.01716	5.43295	1.71372	1.33709	1.49714	1.28041	0.990555	1.07265	protein_coding	HGNC:30910	OTTHUMG00000002975.6_5
ENSG00000160072.19_2	ATAD3B	0.474875	0.00686774	0.0282924	0	22.7874	25.3083	22.6482	40.3723	27.3776	30.5299	2.96634	3.29449	2.94822	5.25544	3.56386	3.97422	protein_coding	HGNC:24007	OTTHUMG00000000577.5_2
ENSG00000197785.13_5	ATAD3A	0.21333	0.00747978	0.0299591	0	31.9181	30.4665	33.0392	38.9506	35.8428	35.8413	10.4001	9.92716	10.7655	12.6916	11.679	11.6785	protein_coding	HGNC:25567	OTTHUMG00000000575.6_5
ENSG00000205090.9_3	TMEM240	0.017088	0.923127	0.950811	0	2.82149	2.09666	3.09374	2.97972	2.39502	2.73675	1.40442	1.04363	1.53994	1.48319	1.19215	1.36224	protein_coding	HGNC:25186	OTTHUMG00000042193.4_3
ENSG00000160075.12_3	SSU72	0.0964377	0.201909	0.322022	0	81.1177	88.7461	90.2903	87.5609	100.715	89.9072	11.7239	12.8264	13.0496	12.6551	14.5563	12.9943	protein_coding	HGNC:25016	OTTHUMG00000000576.6_3
ENSG00000228594.4_6	FNDC10	0.0964109	0.482615	0.608862	0	6.11322	5.06537	6.15386	5.86206	7.16442	5.51404	2.87816	2.38483	2.8973	2.75992	3.37308	2.59606	protein_coding	HGNC:42951	OTTHUMG00000154864.5_6
ENSG00000272106.1_6	AL691432.2	-0.0413393	0.667307	0.766425	0	11.3055	10.3348	12.913	11.2957	11.3351	10.9673	5.54737	5.07107	6.33612	5.54253	5.56186	5.38138	lncRNA	NA	OTTHUMG00000185588.1_6
ENSG00000197530.12_6	MIB2	0.270244	0.0232634	0.0666418	0	33.6619	30.5592	34.8887	45.8838	36.1318	37.5036	3.83961	3.48571	3.97955	5.23369	4.12134	4.27781	protein_coding	HGNC:30577	OTTHUMG00000074647.10_6
ENSG00000248333.8_3	CDK11B	0.158029	0.0651747	0.142081	0	24.5508	28.0173	28.3817	31.7837	29.8552	28.7054	7.65539	8.73628	8.84994	9.91072	9.30939	8.95087	protein_coding	HGNC:1729	OTTHUMG00000078638.6_3
ENSG00000189339.11_2	SLC35E2B	-0.0408871	0.55074	0.668169	0	71.5756	69.9689	69.1889	74.7072	63.9017	66.209	8.56167	8.36949	8.27619	8.93627	7.64374	7.91974	protein_coding	HGNC:33941	OTTHUMG00000078639.3_2
ENSG00000008128.23_5	CDK11A	0.30636	0.0750603	0.156812	0	3.3897	3.65523	3.02649	4.71302	3.36542	4.35852	0.666608	0.718826	0.59518	0.926848	0.661833	0.857133	protein_coding	HGNC:1730	OTTHUMG00000000703.16_5
ENSG00000268575.1_7	AL031282.2	0.172906	0.440997	0.572409	0	2.1553	2.05955	1.71501	2.96024	1.77562	1.92586	0.424355	0.405503	0.337667	0.58284	0.3496	0.379181	lncRNA	NA	OTTHUMG00000183552.1_7
ENSG00000215790.7_5	SLC35E2A	-0.0954207	0.132313	0.236981	0	39.1285	37.2574	36.2338	36.4967	33.9226	34.9695	5.07306	4.83047	4.69776	4.73184	4.39811	4.53385	protein_coding	HGNC:20863	OTTHUMG00000000823.6_5
ENSG00000008130.15_2	NADK	0.0490646	0.329729	0.461972	0	99.6533	101.011	99.8741	107.504	101.272	102.152	17.8911	18.1348	17.9307	19.3005	18.1817	18.3396	protein_coding	HGNC:29831	OTTHUMG00000000942.6_2
ENSG00000078369.18_3	GNB1	-0.147221	0.0369958	0.0939007	0	710.524	762.311	772.427	657.057	686.546	683.862	110.725	118.796	120.372	102.393	106.989	106.57	protein_coding	HGNC:4396	OTTHUMG00000000940.9_3
ENSG00000231050.1_6	AL109917.1	0.0705753	0.675834	0.772503	0	1.19521	1.18749	1.0929	1.07114	1.36269	1.21633	1.31922	1.31069	1.20629	1.18227	1.50407	1.34253	lncRNA	NA	OTTHUMG00000000941.1_6
ENSG00000067606.17_5	PRKCZ	-0.629332	0.00740099	0.0297599	-1	3.80117	2.46775	3.11056	2.10333	2.14726	1.80423	0.493979	0.320695	0.404231	0.273337	0.279046	0.234467	protein_coding	HGNC:9412	OTTHUMG00000001238.14_5
ENSG00000182873.5_6	PRKCZ-AS1	-0.310456	0.112243	0.210636	0	2.09652	2.18943	2.16898	1.32432	2.02338	1.86504	1.20907	1.26265	1.25086	0.763737	1.16689	1.07557	lncRNA	HGNC:40477	OTTHUMG00000001239.2_6
ENSG00000162585.17_4	FAAP20	0.080857	0.281884	0.411642	0	52.6089	56.016	61.5891	62.4572	60.784	56.823	4.81943	5.13155	5.64209	5.72162	5.56834	5.20548	protein_coding	HGNC:26428	OTTHUMG00000001404.8_4
ENSG00000157933.10_3	SKI	-0.125192	0.0315366	0.083728	0	106.942	114.184	109.172	102.07	101.685	99.0905	16.327	17.4327	16.6675	15.5832	15.5245	15.1283	protein_coding	HGNC:10896	OTTHUMG00000001407.4_3
ENSG00000116151.14_6	MORN1	0.343061	0.025165	0.0707693	0	5.91728	5.60345	6.23793	8.91968	6.75149	6.852	0.521944	0.494262	0.550228	0.786776	0.595527	0.604393	protein_coding	HGNC:25852	OTTHUMG00000001402.7_6
ENSG00000269896.2_5	AL513477.1	0.459829	0.0608563	0.135497	0	1.25399	1.37303	1.19378	2.18123	1.25945	1.80423	0.520978	0.570433	0.495963	0.906204	0.523245	0.749575	transcribed_processed_pseudogene	NA	OTTHUMG00000057495.3_5
ENSG00000157916.20_5	RER1	0.180333	0.00380612	0.0187942	0	124.459	123.202	125.952	139.969	140.233	143.162	21.8771	21.6561	22.1396	24.6034	24.6498	25.1648	protein_coding	HGNC:30309	OTTHUMG00000001403.6_5
ENSG00000157911.10_5	PEX10	0.0739202	0.316797	0.448682	0	53.5886	58.4095	62.4129	57.7442	63.5094	62.3776	14.1432	15.4155	16.4721	15.24	16.7615	16.4628	protein_coding	HGNC:8851	OTTHUMG00000001637.8_5
ENSG00000157881.14_5	PANK4	0.0606654	0.366139	0.499862	0	33.0349	34.6041	34.7206	38.191	33.6542	34.9087	6.46602	6.77317	6.79596	7.47525	6.58724	6.83279	protein_coding	HGNC:19366	OTTHUMG00000000791.6_5
ENSG00000197921.6_3	HES5	0.261026	0.314882	0.446941	0	1.19521	1.74412	1.64776	2.49284	1.50721	1.50014	0.902729	1.31731	1.24453	1.88281	1.13838	1.13304	protein_coding	HGNC:19764	OTTHUMG00000000793.2_3
ENSG00000272449.2_6	AL139246.5	1.77186	0.000253568	0.00297344	1	0.195936	0.278317	0.487601	1.14904	1.03234	1.17579	0.127979	0.181788	0.318485	0.750517	0.67429	0.767987	lncRNA	NA	OTTHUMG00000185639.2_6
ENSG00000157873.17_5	TNFRSF14	0.598124	0.01714	0.0534936	0	1.05806	0.667961	0.79025	1.34379	1.21816	1.2366	0.170133	0.107407	0.12707	0.216079	0.195877	0.198843	protein_coding	HGNC:11912	OTTHUMG00000000792.18_5
ENSG00000157870.16_5	PRXL2B	0.0755635	0.217256	0.339918	0	55.7243	59.0404	57.89	63.0415	61.7338	57.1676	16.5305	17.5142	17.1729	18.7011	18.3132	16.9587	protein_coding	HGNC:28390	OTTHUMG00000000847.6_5
ENSG00000162591.16_3	MEGF6	1.90491	3.36374e-06	0.000186961	1	0.960089	1.4658	1.26104	4.12876	4.50099	5.23023	0.106428	0.162488	0.139789	0.457683	0.498946	0.579784	protein_coding	HGNC:3232	OTTHUMG00000000611.8_3
ENSG00000158109.15_3	TPRG1L	0.59737	3.94872e-05	0.000874627	1	19.6524	18.7771	18.0917	26.0579	30.8669	28.5838	8.1851	7.82055	7.53506	10.853	12.8558	11.905	protein_coding	HGNC:27007	OTTHUMG00000000609.2_3
ENSG00000116213.16_3	WRAP73	0.100014	0.27751	0.40695	0	26.7257	24.362	28.1295	31.1215	25.7052	28.077	3.50088	3.19125	3.68477	4.0767	3.3672	3.67789	protein_coding	HGNC:12759	OTTHUMG00000000612.6_3
ENSG00000078900.15_5	TP73	-1.29085	0.000482935	0.00463706	-1	1.44993	1.37303	0.941574	0.564783	0.433582	0.527077	0.214265	0.202901	0.139142	0.0834614	0.064073	0.0778894	protein_coding	HGNC:12003	OTTHUMG00000000610.7_5
ENSG00000227372.12_6	TP73-AS1	0.126873	0.102426	0.196806	0	25.3738	27.4235	26.5995	31.2578	27.3569	28.077	2.61558	2.82688	2.74193	3.22213	2.82001	2.89424	transcribed_unitary_pseudogene	HGNC:29052	OTTHUMG00000003414.6_6
ENSG00000130764.10_3	LRRC47	0.0230646	0.665657	0.765187	0	53.0008	55.181	57.2847	56.7899	56.2005	55.1607	11.7545	12.238	12.7045	12.5948	12.4641	12.2335	protein_coding	HGNC:29207	OTTHUMG00000003506.4_3
ENSG00000116198.13_4	CEP104	0.122817	0.0994523	0.192417	0	33.4464	37.5914	38.47	38.4637	40.6741	40.139	4.24931	4.77593	4.88757	4.88676	5.16759	5.0996	protein_coding	HGNC:24866	OTTHUMG00000003507.6_4
ENSG00000169598.15_3	DFFB	0.00800566	0.921721	0.950191	0	10.6002	10.5946	10.4918	11.4125	10.5711	9.87256	2.73906	2.73762	2.71107	2.94897	2.73156	2.55105	protein_coding	HGNC:2773	OTTHUMG00000003525.6_3
ENSG00000198912.11_3	C1orf174	0.0999718	0.103308	0.197889	0	27.8622	28.7038	29.1888	31.5694	29.8139	30.5299	6.34963	6.54143	6.65196	7.19449	6.79442	6.9576	protein_coding	HGNC:27915	OTTHUMG00000003739.2_3
ENSG00000196581.10_2	AJAP1	0.108738	0.659629	0.760208	0	2.99783	5.69623	6.17068	4.82987	5.82238	5.43295	0.241663	0.459188	0.497435	0.389349	0.469358	0.437965	protein_coding	HGNC:30801	OTTHUMG00000000645.6_2
ENSG00000131697.18_5	NPHP4	0.227573	0.0539399	0.124145	0	19.8876	19.7234	18.9492	26.798	21.0184	20.7182	1.51041	1.49794	1.43914	2.03524	1.59629	1.57349	protein_coding	HGNC:19104	OTTHUMG00000000701.7_5
ENSG00000069424.15_3	KCNAB2	0.00984904	0.938293	0.959029	0	4.91801	5.12104	4.18664	5.23885	4.7694	4.29771	0.283802	0.295518	0.241598	0.302317	0.275226	0.248007	protein_coding	HGNC:6229	OTTHUMG00000000795.17_3
ENSG00000116254.18_4	CHD5	0.645714	0.0261574	0.0730643	0	0.411467	0.667961	0.756622	0.895863	0.970397	1.03388	0.0407635	0.0661741	0.0749576	0.0887521	0.096136	0.102425	protein_coding	HGNC:16816	OTTHUMG00000000952.7_4
ENSG00000116251.11_5	RPL22	0.0989086	0.151526	0.262554	0	105.806	107.505	100.917	103.141	116.84	116.545	22.6808	23.0449	21.6327	22.1096	25.0461	24.9828	protein_coding	HGNC:10315	OTTHUMG00000193375.2_5
ENSG00000226944.1_7	AL031847.1	0.610269	0.0390432	0.0977012	0	0.548622	0.482416	0.689367	0.642684	0.970397	1.03388	1.45138	1.27623	1.82372	1.70022	2.56719	2.73514	lncRNA	NA	OTTHUMG00000041452.1_7
ENSG00000158286.13_3	RNF207	0.517107	0.00379651	0.0187738	0	7.11249	9.62977	9.51663	12.5421	11.2938	13.7851	1.07847	1.46016	1.44301	1.90176	1.71248	2.09023	protein_coding	HGNC:32947	OTTHUMG00000001089.5_3
ENSG00000116237.16_3	ICMT	-0.0220574	0.741762	0.823959	0	188.158	166.675	162.859	170.272	172.71	166.82	38.3213	33.946	33.1688	34.6787	35.1752	33.9756	protein_coding	HGNC:5350	OTTHUMG00000001254.3_3
ENSG00000158292.7_3	GPR153	0.0747705	0.269153	0.398715	0	40.6372	36.7564	40.5886	41.9692	42.9452	39.3483	9.68014	8.7557	9.66855	9.99744	10.2299	9.37312	protein_coding	HGNC:23618	OTTHUMG00000001272.3_3
ENSG00000097021.19_3	ACOT7	-0.107782	0.0898544	0.178598	0	112.115	109.082	115.965	101.914	110.708	100.287	27.1859	26.4505	28.1195	24.7125	26.8448	24.3178	protein_coding	HGNC:24157	OTTHUMG00000001295.8_3
ENSG00000069812.11_3	HES2	1.37961	4.50437e-06	0.000221117	1	6.30915	4.47163	4.57336	13.4964	12.9455	13.4405	1.16685	0.827007	0.845822	2.49609	2.39421	2.48575	protein_coding	HGNC:16005	OTTHUMG00000000752.2_3
ENSG00000187017.17_6	ESPN	1.45896	1.58952e-06	0.000114992	1	11.7366	8.31241	9.14672	28.6287	26.2214	25.32	1.68823	1.19569	1.3157	4.11805	3.77177	3.64211	protein_coding	HGNC:13281	OTTHUMG00000000753.11_6
ENSG00000215788.10_6	TNFRSF25	0.388682	0.0694228	0.148247	0	22.4739	18.9998	18.8819	33.6533	18.644	26.6377	5.24724	4.43609	4.40858	7.85741	4.35303	6.2194	protein_coding	HGNC:11910	OTTHUMG00000000831.9_6
ENSG00000171680.21_3	PLEKHG5	0.207991	0.0844953	0.170726	0	77.7476	77.2794	76.8224	106.218	76.8266	84.7175	11.0233	10.957	10.8922	15.06	10.8927	12.0116	protein_coding	HGNC:29105	OTTHUMG00000000905.4_3
ENSG00000162408.11_3	NOL9	0.0713117	0.285089	0.415124	0	16.9877	16.866	17.52	18.8716	17.591	17.5152	2.33636	2.31963	2.40957	2.59546	2.41934	2.40891	protein_coding	HGNC:26265	OTTHUMG00000000904.2_3
ENSG00000204859.13_4	ZBTB48	0.138756	0.211683	0.333795	0	17.6147	18.573	19.0837	23.4677	17.6323	19.7451	3.9057	4.11819	4.23142	5.20349	3.90961	4.37808	protein_coding	HGNC:4930	OTTHUMG00000001438.5_4
ENSG00000162413.16_4	KLHL21	0.141445	0.106834	0.202892	0	81.7839	98.1532	100.866	102.226	103.729	103.834	11.851	14.223	14.6162	14.8132	15.0311	15.0463	protein_coding	HGNC:29041	OTTHUMG00000001437.3_4
ENSG00000116273.6_3	PHF13	-0.17746	0.00695752	0.0285163	0	41.7345	42.564	42.9425	37.9963	38.052	36.4697	11.4908	11.7192	11.8234	10.4615	10.4769	10.0412	protein_coding	HGNC:22983	OTTHUMG00000001439.2_3
ENSG00000041988.15_5	THAP3	-0.0139043	0.842988	0.899319	0	22.8658	21.8201	22.7155	22.3771	23.7231	20.6574	5.61537	5.35856	5.57846	5.49536	5.82591	5.07303	protein_coding	HGNC:20855	OTTHUMG00000001440.3_5
ENSG00000007923.16_4	DNAJC11	0.13625	0.0361853	0.092427	0	76.6504	83.5137	83.363	91.8065	89.2766	86.5826	15.0797	16.43	16.4003	18.0615	17.5638	17.0338	protein_coding	HGNC:25570	OTTHUMG00000001443.6_4
ENSG00000171735.19_4	CAMTA1	-0.224275	0.00258481	0.0143667	0	49.5523	48.3715	47.2637	42.0277	42.5323	39.7132	5.00377	4.88453	4.77266	4.24393	4.29489	4.01022	protein_coding	HGNC:18806	OTTHUMG00000001212.7_4
ENSG00000049245.13_4	VAMP3	0.236636	0.00260274	0.0144253	0	131.199	125.224	118.79	142.17	149.297	150.602	48.0055	45.8193	43.4649	52.0196	54.6274	55.1051	protein_coding	HGNC:12644	OTTHUMG00000001225.4_4
ENSG00000049246.14_2	PER3	-0.38813	0.00026852	0.00309307	0	31.0755	35.2721	34.4347	25.4153	25.3749	26.2322	3.83696	4.35511	4.25173	3.13807	3.13309	3.23895	protein_coding	HGNC:8847	OTTHUMG00000001216.3_2
ENSG00000116288.13_4	PARK7	-0.045245	0.471632	0.599538	0	206.184	216.345	228.601	200.888	217.72	212.453	86.0175	90.2567	95.3696	83.8079	90.8302	88.6327	protein_coding	HGNC:16369	OTTHUMG00000001210.4_4
ENSG00000116285.13_3	ERRFI1	-0.210199	0.0245637	0.0695074	0	118.973	98.0975	101.757	95.7795	89.5863	90.191	28.4692	23.4739	24.3497	22.9192	21.4372	21.582	protein_coding	HGNC:18185	OTTHUMG00000001221.4_3
ENSG00000162426.14_3	SLC45A1	0.236182	0.0325626	0.0856867	0	5.48622	5.34369	5.51494	5.97891	6.81343	6.46683	1.89966	1.85031	1.9096	2.07026	2.35922	2.23921	protein_coding	HGNC:17939	OTTHUMG00000000503.6_3
ENSG00000142599.19_6	RERE	-0.354109	0.00139052	0.00943555	0	111.762	135.54	130.559	101.349	95.1196	99.1716	7.91965	9.60463	9.25166	7.18179	6.74033	7.02747	protein_coding	HGNC:9965	OTTHUMG00000001765.9_6
ENSG00000074800.16_7	ENO1	-0.147088	0.0972269	0.18929	0	1279.37	1417.06	1489.22	1194.34	1347.41	1238.23	245.277	271.676	285.51	228.977	258.322	237.39	protein_coding	HGNC:3350	OTTHUMG00000001773.11_7
ENSG00000238249.2_4	HMGN2P17	-0.244037	0.181878	0.298579	0	1.64587	1.28026	1.71501	1.36327	1.21816	1.33797	2.21516	1.72309	2.30822	1.83482	1.63951	1.80076	processed_pseudogene	HGNC:39381	OTTHUMG00000001781.1_4
ENSG00000180758.12_4	GPR157	0.779895	0.000203587	0.00257081	1	2.72352	2.70895	2.30349	4.51827	4.02612	4.72342	0.513484	0.510738	0.434294	0.85186	0.759072	0.89054	protein_coding	HGNC:23687	OTTHUMG00000001758.6_4
ENSG00000228526.7_5	MIR34AHG	1.03791	0.000478953	0.00460529	1	9.2678	8.83193	9.31486	23.9351	13.1313	19.1978	1.06502	1.01493	1.07043	2.75053	1.509	2.20613	lncRNA	HGNC:51913	OTTHUMG00000001762.6_5
ENSG00000234546.4_5	LNCTAM34A	0.570075	0.000991922	0.00743969	0	2.09652	2.33786	2.20261	3.25237	3.26219	3.34491	0.979225	1.09195	1.02878	1.51909	1.52367	1.56231	lncRNA	HGNC:52548	OTTHUMG00000001764.8_5
ENSG00000049239.12_3	H6PD	0.155186	0.0192764	0.0581568	0	70.4784	74.1994	73.7791	85.2823	79.6758	78.3115	7.56124	7.96045	7.91536	9.14948	8.54799	8.40162	protein_coding	HGNC:4795	OTTHUMG00000001768.2_3
ENSG00000171621.14_3	SPSB1	0.729504	0.00158754	0.0102874	1	4.68288	3.3027	3.29551	6.4658	6.68955	5.51404	1.38179	0.974534	0.972414	1.90788	1.9739	1.62704	protein_coding	HGNC:30628	OTTHUMG00000001279.5_3
ENSG00000284693.1_5	LINC02606	0.214229	0.298124	0.428988	0	1.39115	1.6699	1.81589	1.8112	1.52786	2.3313	0.530366	0.636639	0.692296	0.690508	0.582486	0.888793	lncRNA	HGNC:54047	OTTHUMG00000192293.1_5
ENSG00000171612.7_4	SLC25A33	-0.410915	0.00190343	0.0115979	0	12.8142	11.9305	12.8962	8.33542	9.93109	10.055	3.31546	3.08681	3.33666	2.15664	2.56949	2.60156	protein_coding	HGNC:29681	OTTHUMG00000001322.3_4
ENSG00000188807.13_4	TMEM201	-0.0656939	0.331565	0.464259	0	42.7337	43.4175	44.977	45.1048	40.736	39.4497	6.12144	6.21938	6.44277	6.46108	5.83527	5.65101	protein_coding	HGNC:33719	OTTHUMG00000057457.3_4
ENSG00000171608.15_2	PIK3CD	0.237046	0.0156618	0.0503748	0	36.2091	39.6138	40.5381	49.9931	45.5054	41.6594	5.71842	6.25613	6.40211	7.8953	7.18658	6.57918	protein_coding	HGNC:8977	OTTHUMG00000001450.2_2
ENSG00000231789.2_6	PIK3CD-AS2	-0.481582	0.00833589	0.0322332	0	2.64514	2.18943	2.37075	1.5775	1.79627	1.78395	2.81698	2.33166	2.52476	1.67998	1.91296	1.89984	lncRNA	HGNC:51334	OTTHUMG00000001449.2_6
ENSG00000171603.17_3	CLSTN1	0.105715	0.0790915	0.163356	0	285.538	301.585	298.277	326.367	310.816	315.537	50.2443	53.0678	52.4859	57.4286	54.6923	55.5229	protein_coding	HGNC:17447	OTTHUMG00000001451.3_3
ENSG00000178585.15_3	CTNNBIP1	0.03867	0.652187	0.75462	0	19.1822	15.5858	17.5536	17.703	18.2724	17.7584	5.74489	4.66779	5.25715	5.3019	5.47241	5.31849	protein_coding	HGNC:16913	OTTHUMG00000001796.2_3
ENSG00000162441.12_3	LZIC	-0.00353542	0.948819	0.966563	0	36.4834	34.7896	35.3259	34.666	34.9549	36.713	6.68316	6.3729	6.47112	6.35025	6.40318	6.72522	protein_coding	HGNC:17497	OTTHUMG00000001804.4_3
ENSG00000173614.14_4	NMNAT1	0.249018	0.0311684	0.0829923	0	7.48477	7.60734	8.28922	9.05601	8.52711	10.2172	1.6236	1.65018	1.79809	1.96443	1.8497	2.21631	protein_coding	HGNC:17877	OTTHUMG00000001799.7_4
ENSG00000130939.19_5	UBE4B	0.0833327	0.130298	0.234499	0	72.6924	77.2052	77.1082	81.6794	78.3957	80.4401	7.96368	8.45806	8.44744	8.94822	8.58849	8.81246	protein_coding	HGNC:12500	OTTHUMG00000001797.3_5
ENSG00000054523.17_4	KIF1B	-0.15918	0.0248228	0.0701099	0	150.93	165.395	159.883	148.538	135.773	142.149	8.51749	9.33378	9.02273	8.38251	7.66214	8.02193	protein_coding	HGNC:16636	OTTHUMG00000001817.2_4
ENSG00000142657.21_4	PGD	0.0934026	0.175518	0.291456	0	349.923	368.511	389.038	376.73	411.345	393.504	104.987	110.564	116.723	113.03	123.416	118.063	protein_coding	HGNC:8891	OTTHUMG00000001905.5_4
ENSG00000175279.22_4	CENPS	-0.239892	0.139348	0.246449	0	2.44921	1.92967	2.11854	1.77225	1.98209	1.74341	1.40115	1.10393	1.21198	1.01387	1.13392	0.997374	protein_coding	HGNC:23163	OTTHUMG00000059085.11_4
ENSG00000160049.12_3	DFFA	0.0299747	0.639248	0.743481	0	61.622	67.1301	70.0128	66.1186	70.4261	66.432	9.30144	10.1328	10.568	9.98017	10.6303	10.0275	protein_coding	HGNC:2772	OTTHUMG00000001909.4_3
ENSG00000142655.13_3	PEX14	0.0341337	0.622679	0.73018	0	23.434	26.1433	26.465	25.7269	26.8614	25.2997	7.9925	8.91653	9.02625	8.77451	9.16147	8.62882	protein_coding	HGNC:8856	OTTHUMG00000001908.3_3
ENSG00000130940.15_3	CASZ1	-0.262623	0.00952557	0.0353207	0	9.44414	10.1307	10.021	8.16015	8.58905	7.92643	0.83311	0.893679	0.884002	0.719843	0.757679	0.699226	protein_coding	HGNC:26002	OTTHUMG00000002035.6_3
ENSG00000120948.17_6	TARDBP	-0.181045	0.0111282	0.0395005	0	124.243	119.973	112.569	108.01	101.148	105.517	20.4651	19.7617	18.542	17.7911	16.6609	17.3805	protein_coding	HGNC:11571	OTTHUMG00000002120.16_6
ENSG00000271895.2_8	AL109811.2	0.109589	0.672964	0.77026	0	1.13643	0.964833	0.739808	1.32432	0.929104	0.790616	1.30624	1.109	0.850355	1.52221	1.06794	0.908754	lncRNA	NA	OTTHUMG00000185649.2_8
ENSG00000116649.10_5	SRM	-0.00418243	0.968702	0.979803	0	74.4755	94.9618	100.16	87.3272	94.6034	86.9677	39.3218	50.1382	52.8828	46.1073	49.949	45.9175	protein_coding	HGNC:11296	OTTHUMG00000002119.4_5
ENSG00000171824.14_4	EXOSC10	0.153173	0.0211999	0.0623638	0	94.6765	96.1864	93.9893	112.333	102.036	102.375	15.8031	16.0552	15.6884	18.7504	17.0316	17.0881	protein_coding	HGNC:9138	OTTHUMG00000002123.3_4
ENSG00000198793.12_5	MTOR	0.252115	0.00330888	0.0170468	0	73.2607	79.3761	77.8985	98.0191	86.5925	89.9478	6.04511	6.54972	6.4278	8.08805	7.14518	7.42204	protein_coding	HGNC:3942	OTTHUMG00000002001.3_5
ENSG00000120942.13_5	UBIAD1	-0.0337998	0.538398	0.657513	0	32.3687	30.7819	31.3746	30.4009	31.3418	30.5908	6.36929	6.05704	6.17367	5.98208	6.16721	6.01943	protein_coding	HGNC:30791	OTTHUMG00000002075.2_5
ENSG00000116661.11_5	FBXO2	0.291619	0.121576	0.222832	0	1.07765	1.2246	0.992016	1.20747	1.50721	1.31769	0.340705	0.387163	0.313631	0.381748	0.476514	0.416596	protein_coding	HGNC:13581	OTTHUMG00000002072.6_5
ENSG00000132879.14_4	FBXO44	0.163849	0.0587688	0.131902	0	25.6677	26.1062	25.2207	31.4526	26.0975	28.6852	7.27748	7.4018	7.15076	8.91766	7.39935	8.13302	protein_coding	HGNC:24847	OTTHUMG00000002071.7_4
ENSG00000116663.11_3	FBXO6	0.0289368	0.846242	0.901774	0	3.89914	4.34175	3.90081	3.34975	4.7694	4.27743	2.24734	2.50245	2.2483	1.93069	2.74893	2.46538	protein_coding	HGNC:13585	OTTHUMG00000002229.2_3
ENSG00000116670.15_4	MAD2L2	-0.198331	0.0206508	0.0611826	0	89.5822	84.4971	95.0318	77.0442	84.4452	73.0813	26.9501	25.4203	28.5896	23.1782	25.4047	21.9859	protein_coding	HGNC:6764	OTTHUMG00000002231.6_4
ENSG00000162490.7_3	DRAXIN	-0.275899	0.129144	0.232953	0	138.214	97.7079	100.143	113.444	81.947	82.0619	18.7663	13.2665	13.5972	15.4031	11.1265	11.1421	protein_coding	HGNC:25054	OTTHUMG00000002227.2_3
ENSG00000177674.16_6	AGTRAP	0.302247	0.00482707	0.0220885	0	20.6321	22.1169	22.3792	26.0969	29.5868	24.651	8.47315	9.08293	9.19064	10.7174	12.1506	10.1236	protein_coding	HGNC:13539	OTTHUMG00000002230.6_6
ENSG00000177000.12_6	MTHFR	-0.00173474	0.983245	0.98925	0	23.0813	28.5368	26.0614	25.7463	25.7671	26.0903	1.92698	2.38243	2.17578	2.14947	2.15121	2.17819	protein_coding	HGNC:7436	OTTHUMG00000002277.7_6
ENSG00000011021.23_5	CLCN6	0.11554	0.259744	0.388183	0	66.6968	82.6045	82.4214	87.2493	75.7529	88.0827	8.16062	10.107	10.0846	10.6753	9.26868	10.7773	protein_coding	HGNC:2024	OTTHUMG00000002299.8_5
ENSG00000116685.16_3	KIAA2013	0.0829943	0.163088	0.276663	0	61.0734	60.6175	65.3554	65.3785	68.4853	64.2832	18.6143	18.4753	19.9193	19.9264	20.8733	19.5925	protein_coding	HGNC:28513	OTTHUMG00000002391.2_3
ENSG00000083444.17_4	PLOD1	0.381245	0.000214222	0.00266036	0	407.058	422.931	444.944	528.968	574.991	556.634	76.5147	79.4983	83.6362	99.4301	108.081	104.63	protein_coding	HGNC:9081	OTTHUMG00000002393.5_4
ENSG00000116688.16_6	MFN2	0.0580317	0.249168	0.376201	0	126.379	129.213	132.577	134.418	136.145	133.553	25.413	25.983	26.6594	27.0296	27.3768	26.8557	protein_coding	HGNC:16877	OTTHUMG00000002392.7_6
ENSG00000116691.11_3	MIIP	-0.0750785	0.338783	0.471901	0	22.0429	23.5827	24.3632	23.7793	22.154	20.5155	7.81384	8.35971	8.63638	8.4294	7.85323	7.27241	protein_coding	HGNC:25715	OTTHUMG00000002439.2_3
ENSG00000028137.19_4	TNFRSF1B	0.309745	0.156252	0.268767	0	7.03412	4.3603	4.11939	6.60212	5.76044	6.81146	1.86186	1.15413	1.09036	1.74752	1.52473	1.80293	protein_coding	HGNC:11917	OTTHUMG00000001829.2_4
ENSG00000048707.15_6	VPS13D	0.276274	0.0123472	0.0425356	0	28.8027	36.274	33.2073	40.5475	37.4532	41.0512	1.38701	1.7468	1.59912	1.95259	1.80358	1.97685	protein_coding	HGNC:23595	OTTHUMG00000013155.8_6
ENSG00000162496.9_3	DHRS3	-0.100369	0.851315	0.904642	0	1.07765	4.43452	4.7415	1.51907	4.25323	3.87199	0.306673	1.26196	1.34932	0.432292	1.21037	1.10188	protein_coding	HGNC:17693	OTTHUMG00000001885.6_3
ENSG00000162493.16_4	PDPN	-0.255195	0.00108646	0.0078724	0	89.2295	85.0908	86.8434	69.5657	75.7736	73.4867	24.0705	22.9541	23.4269	18.766	20.4407	19.8238	protein_coding	HGNC:29602	OTTHUMG00000007912.5_4
ENSG00000116731.22_4	PRDM2	-0.0530406	0.410658	0.542715	0	48.6314	49.1323	50.3238	50.9863	44.5763	47.1734	4.4522	4.49806	4.60714	4.66779	4.08096	4.31872	protein_coding	HGNC:9347	OTTHUMG00000007917.6_4
ENSG00000189337.17_6	KAZN	0.657047	4.18952e-05	0.00090926	1	23.2773	20.0017	19.0669	34.6465	31.6721	31.9287	1.67946	1.44313	1.37568	2.49975	2.28515	2.30366	protein_coding	HGNC:29173	OTTHUMG00000002042.8_6
ENSG00000171729.14_4	TMEM51	0.350661	0.221595	0.345363	0	2.1553	1.18749	1.0929	1.6554	2.16791	1.80423	0.963048	0.530602	0.488337	0.739678	0.968681	0.806178	protein_coding	HGNC:25488	OTTHUMG00000002046.5_4
ENSG00000142634.13_3	EFHD2	0.565455	7.61979e-06	0.000293758	0	18.7119	18.0721	19.4872	28.2781	27.4395	27.5702	7.38435	7.13183	7.6903	11.1595	10.8285	10.8801	protein_coding	HGNC:28670	OTTHUMG00000002254.2_3
ENSG00000132906.18_5	CASP9	-0.111207	0.136529	0.242783	0	17.7518	17.534	18.8987	16.0866	16.4142	17.6774	3.36911	3.32776	3.58678	3.05306	3.11523	3.35497	protein_coding	HGNC:1511	OTTHUMG00000002256.8_5
ENSG00000116138.13_3	DNAJC16	0.202259	0.00765197	0.0303614	0	29.606	29.7985	28.0791	33.9844	32.0438	34.6046	3.45743	3.47991	3.27912	3.96875	3.74212	4.04118	protein_coding	HGNC:29157	OTTHUMG00000002358.4_3
ENSG00000197312.12_4	DDI2	0.213115	0.0428215	0.104571	0	19.2214	21.8201	17.6545	23.8378	21.1423	23.0292	1.57837	1.79176	1.44971	1.95744	1.7361	1.89105	protein_coding	HGNC:24578	OTTHUMG00000002381.3_4
ENSG00000116786.13_5	PLEKHM2	0.155078	0.0141763	0.047104	0	105.198	109.063	112.064	125.051	119.607	118.714	25.4471	26.382	27.1079	30.2494	28.9324	28.7165	protein_coding	HGNC:29131	OTTHUMG00000003062.3_5
ENSG00000162461.8_3	SLC25A34	0.197446	0.458302	0.588557	0	0.705371	1.05761	1.04246	1.4217	0.949751	0.851433	0.211316	0.316838	0.3123	0.425913	0.284527	0.255073	protein_coding	HGNC:27653	OTTHUMG00000003063.2_3
ENSG00000162458.13_5	FBLIM1	0.195795	0.0120525	0.0419005	0	351.118	377.083	390.77	420.861	443.265	417.526	80.6983	86.6658	89.8116	96.7274	101.877	95.961	protein_coding	HGNC:24686	OTTHUMG00000003079.8_5
ENSG00000233954.6_2	UQCRHL	0.111413	0.417557	0.54902	0	1.74383	1.94822	1.81589	2.08386	1.92015	1.94613	0.799924	0.893679	0.832979	0.955897	0.880802	0.892721	protein_coding	HGNC:51714	OTTHUMG00000003109.3_2
ENSG00000179743.4_7	AL450998.2	-0.11275	0.300655	0.431585	0	5.09435	4.89838	5.49812	4.51827	4.70746	5.1086	2.05999	1.98075	2.22326	1.82704	1.90354	2.06575	lncRNA	NA	OTTHUMG00000009375.2_7
ENSG00000065526.11_3	SPEN	0.055438	0.545388	0.663204	0	71.1249	81.4171	77.2764	89.6447	71.83	77.3385	5.28928	6.05466	5.74674	6.66652	5.34172	5.75135	protein_coding	HGNC:17575	OTTHUMG00000009376.3_3
ENSG00000116809.11_2	ZBTB17	0.140739	0.0525097	0.12171	0	44.1249	43.3433	45.3637	51.7069	49.5316	45.207	10.4068	10.2225	10.699	12.195	11.682	10.662	protein_coding	HGNC:12936	OTTHUMG00000009377.3_2
ENSG00000142627.13_3	EPHA2	-0.282478	0.237796	0.364301	0	133.237	247.925	252.292	146.162	189.578	185.207	32.175	59.8708	60.9253	35.2963	45.7808	44.7251	protein_coding	HGNC:3386	OTTHUMG00000009527.3_3
ENSG00000142632.17_4	ARHGEF19	-0.224407	0.147793	0.257982	0	2.39043	2.72751	2.87516	2.02543	2.33308	2.49348	0.631052	0.720039	0.759019	0.534696	0.615914	0.658258	protein_coding	HGNC:26604	OTTHUMG00000002219.5_4
ENSG00000204377.3	C1orf134	0.0237596	0.92942	0.954481	0	0.705371	0.890615	0.857505	0.584259	0.784577	1.13524	2.79909	3.53419	3.4028	2.31849	3.1134	4.50493	protein_coding	NA	NA
ENSG00000132881.12_4	CPLANE2	-0.145875	0.236939	0.363192	0	4.09507	4.34175	4.1362	3.4666	4.23258	3.66927	2.6017	2.75842	2.62783	2.20241	2.68906	2.33117	protein_coding	HGNC:28127	OTTHUMG00000002214.5_4
ENSG00000037637.11_4	FBXO42	-0.127733	0.0450244	0.10846	0	43.204	45.3286	46.238	39.6517	42.202	41.5175	4.79565	5.03148	5.13243	4.40134	4.68442	4.60844	protein_coding	HGNC:29249	OTTHUMG00000002218.3_4
ENSG00000055070.17_3	SZRD1	-0.0642019	0.280459	0.410305	0	320.062	326.856	335.402	306.969	328.345	304.265	67.4952	68.9278	70.7301	64.7342	69.2419	64.164	protein_coding	HGNC:30232	OTTHUMG00000002217.6_3
ENSG00000157191.20_3	NECAP2	0.0799535	0.2661	0.395305	0	70.831	78.0958	75.9817	75.1551	85.8698	76.7303	12.855	14.1735	13.7898	13.6398	15.5844	13.9256	protein_coding	HGNC:25528	OTTHUMG00000002313.5_3
ENSG00000080947.15_3	CROCCP3	0.557384	0.0188017	0.0570773	0	3.29173	3.20992	2.7911	5.95944	3.59253	4.09498	0.476717	0.46487	0.404214	0.863061	0.52028	0.593046	transcribed_unprocessed_pseudogene	HGNC:29405	OTTHUMG00000037885.4_3
ENSG00000219481.10_3	NBPF1	0.211144	0.0287161	0.0783077	0	38.9326	38.5191	38.1506	50.032	40.1373	43.6258	3.18806	3.1542	3.12402	4.09695	3.28671	3.57237	protein_coding	HGNC:26088	OTTHUMG00000002487.10_3
ENSG00000215908.10_3	CROCCP2	0.177906	0.207835	0.329132	0	13.4412	13.0809	11.6352	17.1577	11.8719	14.0892	2.39765	2.33338	2.07549	3.0606	2.11771	2.51323	transcribed_unprocessed_pseudogene	HGNC:28170	OTTHUMG00000037884.9_3
ENSG00000058453.17_4	CROCC	0.64221	0.0021727	0.0127754	1	26.8825	21.0964	21.7235	44.5984	30.9082	33.1856	3.02901	2.37706	2.44771	5.02517	3.48261	3.73922	protein_coding	HGNC:21299	OTTHUMG00000002200.10_4
ENSG00000117122.13_5	MFAP2	1.41101	0.00236062	0.0135162	1	5.15313	2.2822	2.30349	11.4125	7.14378	7.17636	1.7678	0.782916	0.790221	3.9151	2.45069	2.46187	protein_coding	HGNC:7033	OTTHUMG00000002290.1_5
ENSG00000159363.18_4	ATP13A2	1.07212	1.09411e-06	8.75062e-05	1	169.172	140.235	148.617	300.718	348.6	313.652	32.2048	26.6961	28.2919	57.2469	66.362	59.709	protein_coding	HGNC:30213	OTTHUMG00000002293.5_4
ENSG00000117118.9_2	SDHB	0.103532	0.191215	0.309106	0	61.8376	63.4563	69.5756	64.3658	75.2368	69.8175	25.1168	25.7743	28.2598	26.1437	30.5592	28.358	protein_coding	HGNC:10681	OTTHUMG00000002289.3_2
ENSG00000117115.13_3	PADI2	5.56323	3.96437e-10	7.74354e-07	1	0.489841	0.389644	0.420346	16.9435	22.2572	22.4413	0.0816402	0.0649407	0.0700576	2.82392	3.70953	3.74022	protein_coding	HGNC:18341	OTTHUMG00000002295.2_3
ENSG00000179051.14_4	RCC2	-0.050796	0.30829	0.440006	0	211.807	207.012	210.526	203.478	202.669	201.425	51.9263	50.7508	51.6121	49.8842	49.6858	49.3809	protein_coding	HGNC:30297	OTTHUMG00000002513.2_4
ENSG00000074964.17_4	ARHGEF10L	0.0190527	0.735977	0.819731	0	37.8941	40.6714	41.0762	41.2097	40.385	39.6524	4.76416	5.11333	5.16422	5.181	5.07733	4.98522	protein_coding	HGNC:25540	OTTHUMG00000002514.4_4
ENSG00000159423.17_5	ALDH4A1	-0.0718609	0.425772	0.557409	0	25.8244	30.1325	30.2481	25.0257	29.339	27.6918	7.11025	8.29639	8.32822	6.89035	8.07793	7.6244	protein_coding	HGNC:406	OTTHUMG00000002443.7_5
ENSG00000169991.11_5	IFFO2	0.177082	0.227582	0.351956	0	142.25	209.313	202.96	192.883	211.464	222.69	23.0215	33.8749	32.8467	31.2159	34.223	36.0398	protein_coding	HGNC:27006	OTTHUMG00000002499.3_5
ENSG00000127481.15_4	UBR4	0.193151	0.159538	0.272499	0	97.4392	124.278	109.929	149.745	109.448	119.951	3.95115	5.03945	4.4576	6.07216	4.43812	4.86398	protein_coding	HGNC:30313	OTTHUMG00000002498.6_4
ENSG00000230424.1_7	EMC1-AS1	-0.111079	0.481384	0.607697	0	1.15603	1.15038	1.2106	1.14904	1.05298	1.05415	2.28013	2.26899	2.38776	2.26635	2.07689	2.0792	lncRNA	HGNC:54050	OTTHUMG00000037839.1_7
ENSG00000127463.15_7	EMC1	0.158218	0.0376372	0.095105	0	91.0125	102.699	103.741	110.464	106.537	114.964	9.47849	10.6956	10.8041	11.5043	11.0953	11.9729	protein_coding	HGNC:28957	OTTHUMG00000002497.6_7
ENSG00000053372.5_4	MRTO4	0.150912	0.0353477	0.0909502	0	68.4798	73.9396	78.8569	81.7767	82.7935	81.1496	26.7918	28.9279	30.8517	31.994	32.3918	31.7487	protein_coding	HGNC:18477	OTTHUMG00000002496.4_4
ENSG00000053371.12_6	AKR7A2	0.0914603	0.1065	0.202415	0	56.1162	54.2347	56.3431	58.2701	61.4241	57.9177	31.5083	30.4518	31.6357	32.7176	34.4885	32.5198	protein_coding	HGNC:389	OTTHUMG00000002522.2_6
ENSG00000040487.13_4	PQLC2	0.292747	0.0014332	0.00960126	0	29.3905	32.5446	31.6436	40.1775	37.0609	37.4022	10.9421	12.1164	11.7809	14.9581	13.7978	13.9249	protein_coding	HGNC:26001	OTTHUMG00000002521.8_4
ENSG00000077549.18_5	CAPZB	-0.231329	0.00465935	0.021625	0	432.334	435.232	458.11	358.54	397.182	373.576	133.478	134.372	141.436	110.695	122.625	115.337	protein_coding	HGNC:1491	OTTHUMG00000002556.7_5
ENSG00000173436.15_5	MICOS10	-0.18661	0.0322718	0.0852102	0	25.8636	24.5847	23.119	20.0206	21.803	22.8062	4.71964	4.48626	4.2188	3.65339	3.97864	4.16172	protein_coding	HGNC:32068	OTTHUMG00000002712.4_5
ENSG00000158747.14_4	NBL1	-0.128585	0.260641	0.389352	0	68.7737	52.806	52.5264	54.5892	55.0649	49.5453	19.1251	14.6847	14.6069	15.1805	15.3128	13.7779	protein_coding	HGNC:7650	OTTHUMG00000002700.7_4
ENSG00000162542.13_3	TMCO4	0.131922	0.215384	0.337801	0	8.71917	7.58878	7.83524	8.02382	8.89875	9.52794	2.15076	1.87192	1.93272	1.97923	2.19505	2.35026	protein_coding	HGNC:27393	OTTHUMG00000002697.1_3
ENSG00000169914.6_3	OTUD3	0.00955012	0.929698	0.954624	0	22.8854	21.8201	20.143	24.5778	18.4788	22.1778	3.32395	3.16922	2.92563	3.56976	2.68393	3.22117	protein_coding	HGNC:29038	OTTHUMG00000002696.2_3
ENSG00000162545.6_3	CAMK2N1	0.445503	0.0308158	0.0823261	0	22.5523	15.4002	13.4342	25.3958	22.1127	22.34	8.65731	5.91179	5.1571	9.74886	8.48855	8.5758	protein_coding	HGNC:24190	OTTHUMG00000002837.2_3
ENSG00000090432.7_3	MUL1	0.235277	0.00223624	0.0130333	0	45.4377	43.0464	43.9682	50.3241	54.3629	51.2279	18.714	17.7292	18.1088	20.7266	22.39	21.0988	protein_coding	HGNC:25762	OTTHUMG00000002838.3_3
ENSG00000158828.8_4	PINK1	-0.0221808	0.764671	0.842087	0	55.4696	53.9564	55.1494	50.811	60.0408	51.2279	11.4773	11.1642	11.411	10.5134	12.4231	10.5996	protein_coding	HGNC:14581	OTTHUMG00000002841.2_4
ENSG00000117242.7_7	PINK1-AS	-0.0213125	0.770017	0.845726	0	9.89479	10.1122	9.66795	9.69869	9.82785	9.71038	2.22705	2.27598	2.176	2.18292	2.21199	2.18555	lncRNA	HGNC:38872	OTTHUMG00000002840.1_7
ENSG00000244038.9_5	DDOST	-0.0130316	0.835683	0.893796	0	342.693	360.05	363.902	331.469	369.019	356.588	125.944	132.323	133.738	121.819	135.619	131.05	protein_coding	HGNC:2728	OTTHUMG00000002844.6_5
ENSG00000117245.12_3	KIF17	0.561689	0.00313633	0.0164366	0	3.11539	4.23042	3.83355	5.06357	6.02885	5.43295	0.696955	0.946403	0.857618	1.13279	1.34874	1.21543	protein_coding	HGNC:19167	OTTHUMG00000002863.3_3
ENSG00000189410.12_6	SH2D5	0.832686	5.65704e-05	0.00108942	1	6.56387	8.33096	8.52461	12.9511	14.1017	14.7176	1.46286	1.85669	1.89985	2.88635	3.1428	3.28006	protein_coding	HGNC:28819	OTTHUMG00000002620.4_6
ENSG00000127483.18_4	HP1BP3	-0.162433	0.0367693	0.0935343	0	315.125	299.785	294.208	291.136	254.182	266.965	42.5729	40.5005	39.7471	39.3321	34.3397	36.0666	protein_coding	HGNC:24973	OTTHUMG00000002622.8_4
ENSG00000075151.20_3	EIF4G3	-0.0571598	0.416369	0.547932	0	148.579	171.703	171.535	161.489	154.768	156.481	15.4834	17.8932	17.8756	16.8288	16.1284	16.3069	protein_coding	HGNC:3298	OTTHUMG00000002624.7_3
ENSG00000117298.16_5	ECE1	0.522038	2.92167e-05	0.000714633	0	986.638	994.984	1013.07	1529.57	1382.77	1387.98	135.008	136.15	138.624	209.301	189.214	189.926	protein_coding	HGNC:3146	OTTHUMG00000002625.6_5
ENSG00000142794.18_3	NBPF3	0.0130039	0.910691	0.943324	0	4.44776	3.67379	4.23708	4.30404	4.12935	4.03417	0.65293	0.539311	0.622003	0.631832	0.606188	0.592215	protein_coding	HGNC:25076	OTTHUMG00000002944.7_3
ENSG00000090686.15_2	USP48	-0.106641	0.0553305	0.126384	0	72.9276	70.5998	73.1233	67.3261	65.3263	68.5606	7.67901	7.4339	7.69963	7.08919	6.87863	7.21918	protein_coding	HGNC:18533	OTTHUMG00000007798.4_2
ENSG00000142798.20_6	HSPG2	0.700788	0.0116322	0.0408547	1	86.839	170.831	163.229	217.052	220.693	246.591	4.79297	9.42881	9.0092	11.9799	12.1809	13.6103	protein_coding	HGNC:5273	OTTHUMG00000002674.11_6
ENSG00000218510.8_7	LINC00339	0.321742	0.0303941	0.081582	0	3.72279	3.45113	3.49728	5.10253	4.17064	4.05444	0.989052	0.916879	0.929138	1.35561	1.10803	1.07716	lncRNA	HGNC:25011	OTTHUMG00000193408.2_7
ENSG00000070831.17_7	CDC42	-0.0837415	0.180596	0.297219	0	325.666	307.281	310.568	283.891	310.259	296.157	20.0065	18.8771	19.079	17.4402	19.06	18.1937	protein_coding	HGNC:1736	OTTHUMG00000002753.10_7
ENSG00000184677.18_5	ZBTB40	0.183454	0.0652407	0.142157	0	43.0668	42.5825	42.1355	53.2454	41.7064	50.1332	4.69701	4.64418	4.59543	5.80711	4.54864	5.46768	protein_coding	HGNC:29045	OTTHUMG00000002897.4_5
ENSG00000133216.16_4	EPHB2	-0.266311	0.00333585	0.0171206	0	344.084	388.976	392.956	310.241	319.364	306.637	27.4915	31.0783	31.3963	24.7876	25.5165	24.4996	protein_coding	HGNC:3393	OTTHUMG00000002881.4_4
ENSG00000004487.16_5	KDM1A	-0.139522	0.0196838	0.059112	0	175.402	177.975	185.272	161.762	163.956	163.293	32.2431	32.7159	34.0573	29.7356	30.1389	30.017	protein_coding	HGNC:29079	OTTHUMG00000003220.7_5
ENSG00000169641.13_4	LUZP1	0.116186	0.235843	0.36208	0	99.81	122.756	124.019	117.864	123.488	134.364	10.3344	12.7103	12.841	12.2038	12.7861	13.9122	protein_coding	HGNC:14985	OTTHUMG00000003227.5_4
ENSG00000179546.4_3	HTR1D	0.440298	0.0074808	0.0299591	0	5.93688	4.80561	4.47248	6.68002	7.41218	6.52765	2.09414	1.6951	1.57759	2.35627	2.61453	2.30252	protein_coding	HGNC:5289	OTTHUMG00000003235.1_3
ENSG00000261326.4_5	LINC01355	-0.0735527	0.804227	0.870404	0	1.43034	2.00388	1.0929	1.8891	0.991044	1.39878	0.231371	0.324148	0.176787	0.305581	0.160311	0.226267	lncRNA	HGNC:50584	OTTHUMG00000175761.6_5
ENSG00000125944.20_5	HNRNPR	-0.319011	0.000938	0.00720117	0	322.766	286.722	284.961	245.096	235.022	236.86	37.2022	33.0478	32.8447	28.2499	27.0887	27.3006	protein_coding	HGNC:5047	OTTHUMG00000003224.6_5
ENSG00000125945.15_3	ZNF436	-0.21644	0.020833	0.0615972	0	50.532	42.3042	44.7752	41.4434	37.5151	39.4497	10.5583	8.83916	9.35546	8.6593	7.83852	8.24273	protein_coding	HGNC:20814	OTTHUMG00000003232.3_3
ENSG00000249087.7_6	ZNF436-AS1	0.317878	0.0806677	0.165351	0	4.3302	3.65523	3.14419	5.41413	4.00547	4.41934	1.61937	1.36695	1.17584	2.02473	1.49793	1.65271	lncRNA	HGNC:25122	OTTHUMG00000003225.3_6
ENSG00000088280.19_4	ASAP3	-0.0913027	0.134404	0.239878	0	42.6358	42.731	44.9938	42.6509	39.6418	40.0781	8.54767	8.56675	9.02041	8.5507	7.94743	8.03491	protein_coding	HGNC:14987	OTTHUMG00000003234.8_4
ENSG00000007968.7_3	E2F2	-0.257594	0.0171314	0.0534789	0	13.1865	11.9862	13.2325	11.7631	10.0963	10.2577	2.41423	2.19447	2.42264	2.15362	1.84845	1.87802	protein_coding	HGNC:3114	OTTHUMG00000003223.2_3
ENSG00000117318.9_3	ID3	-0.932984	0.000166322	0.00224494	-1	289.751	413.598	452.41	199.291	211.464	194.654	193.684	276.469	302.413	133.216	141.353	130.116	protein_coding	HGNC:5362	OTTHUMG00000003229.3_3
ENSG00000142676.14_5	RPL11	0.0687289	0.398878	0.531778	0	621.667	635.825	701.372	634.466	739.401	680.619	233.797	239.122	263.773	238.611	278.075	255.968	protein_coding	HGNC:10301	OTTHUMG00000002926.8_5
ENSG00000236810.6_6	ELOA-AS1	-0.0531713	0.723023	0.809931	0	2.13571	2.18943	2.52207	2.02543	2.49826	2.08804	0.692063	0.709471	0.817263	0.656329	0.809545	0.676616	lncRNA	HGNC:50582	OTTHUMG00000002959.4_6
ENSG00000011007.12_3	ELOA	-0.143776	0.0137349	0.0461079	0	73.2802	74.7374	75.2419	68.3583	67.742	65.986	13.5931	13.8634	13.9569	12.6801	12.5658	12.24	protein_coding	HGNC:11620	OTTHUMG00000002957.3_3
ENSG00000057757.10_5	PITHD1	0.081941	0.149815	0.260381	0	64.0908	59.4857	61.1351	64.4827	66.9161	64.1007	29.4942	27.3749	28.134	29.6745	30.7943	29.4987	protein_coding	HGNC:25022	OTTHUMG00000002960.4_5
ENSG00000011009.11_3	LYPLA2	0.0799533	0.22194	0.345625	0	60.7599	66.9446	67.1376	67.365	72.0778	66.5334	30.0643	33.1245	33.22	33.3325	35.6644	32.921	protein_coding	HGNC:6738	OTTHUMG00000002961.5_3
ENSG00000117308.15_5	GALE	0.0692319	0.325013	0.457098	0	30.233	34.2516	33.2241	35.7761	32.9522	33.7938	7.64425	8.66032	8.40054	9.04579	8.33179	8.54457	protein_coding	HGNC:4116	OTTHUMG00000002958.10_5
ENSG00000117305.15_5	HMGCL	0.189901	0.0309225	0.0825552	0	28.8027	27.405	28.903	29.4077	35.0375	32.6585	5.11774	4.8694	5.13557	5.22525	6.22558	5.80286	protein_coding	HGNC:5005	OTTHUMG00000002963.5_5
ENSG00000179163.11_2	FUCA1	-0.0117562	0.958987	0.973848	0	3.23295	4.37886	4.59018	2.80444	5.05845	4.27743	1.57936	2.13916	2.24239	1.37003	2.47115	2.08961	protein_coding	HGNC:4006	OTTHUMG00000002965.2_2
ENSG00000189266.13_6	PNRC2	-0.240576	0.00159947	0.0103442	0	71.7911	68.9299	65.4899	58.4064	57.5838	58.5258	25.983	24.9475	23.7024	21.1388	20.841	21.182	protein_coding	HGNC:23158	OTTHUMG00000013891.7_6
ENSG00000188529.14_3	SRSF10	-0.305756	0.00349755	0.0177725	0	131.356	118.73	111.98	103.472	90.0611	99.3338	12.7815	11.553	10.8962	10.0683	8.76337	9.66564	protein_coding	HGNC:16713	OTTHUMG00000013893.4_3
ENSG00000001461.17_3	NIPAL3	0.915705	0.00109965	0.00794268	1	2.09652	2.0781	2.21943	2.90182	4.58358	4.60179	0.223129	0.221169	0.23621	0.308835	0.487822	0.489761	protein_coding	HGNC:25233	OTTHUMG00000003299.4_3
ENSG00000117602.12_4	RCAN3	1.80089	9.98769e-05	0.00158978	1	0.587809	0.612298	0.319463	1.44117	2.04403	1.78395	0.0823493	0.08578	0.0447552	0.201901	0.286359	0.249923	protein_coding	HGNC:3042	OTTHUMG00000003298.9_4
ENSG00000133226.17_6	SRRM1	-0.00797737	0.885476	0.927109	0	96.146	103.515	100.849	104.232	96.6474	97.9756	12.1366	13.0668	12.7303	13.1573	12.1999	12.3675	protein_coding	HGNC:16638	OTTHUMG00000003320.5_6
ENSG00000169504.15_4	CLIC4	-0.226813	0.0347211	0.0899472	0	630.582	553.833	488.812	471.828	468.578	489.351	141.165	123.983	109.427	105.625	104.898	109.548	protein_coding	HGNC:13518	OTTHUMG00000003327.5_4
ENSG00000117614.10_4	SYF2	-0.162614	0.00972625	0.035843	0	40.3041	40.1148	39.7311	35.484	36.4415	35.4155	10.6823	10.6321	10.5304	9.40471	9.6585	9.38657	protein_coding	HGNC:19824	OTTHUMG00000043610.2_4
ENSG00000117616.18_6	RSRP1	0.35983	0.0515633	0.120092	0	56.0966	49.5776	41.1098	74.7267	48.9534	64.5467	8.33531	7.36665	6.10844	11.1035	7.27391	9.59089	protein_coding	HGNC:25234	OTTHUMG00000043611.7_6
ENSG00000183726.11_3	TMEM50A	-0.012952	0.826087	0.886689	0	156.592	143.203	143.271	140.904	150.019	148.17	52.0241	47.5759	47.5982	46.8119	49.8403	49.2258	protein_coding	HGNC:30590	OTTHUMG00000007651.2_3
ENSG00000204178.11_4	MACO1	-0.110991	0.0828638	0.168375	0	33.9362	32.0807	31.9967	29.4272	29.9997	31.3206	8.52883	8.0625	8.0414	7.39562	7.53951	7.87146	protein_coding	HGNC:25572	OTTHUMG00000003473.6_4
ENSG00000157978.11_2	LDLRAP1	0.546103	5.8306e-05	0.00111188	0	14.6365	12.9325	13.5015	19.8843	21.0184	19.0559	2.71196	2.39623	2.50167	3.68432	3.89446	3.53083	protein_coding	HGNC:18640	OTTHUMG00000007386.5_2
ENSG00000117643.14_3	MAN1C1	-0.365287	0.000224619	0.00273727	0	53.7258	50.06	47.4823	38.8337	39.0843	39.4903	5.95234	5.5462	5.26061	4.30243	4.33019	4.37517	protein_coding	HGNC:19080	OTTHUMG00000004417.3_3
ENSG00000162430.17_6	SELENON	0.125676	0.0466296	0.111502	0	421.714	410.481	417.689	462.889	463.85	436.907	95.3888	92.8479	94.4784	104.702	104.92	98.8253	protein_coding	HGNC:15999	OTTHUMG00000007375.5_6
ENSG00000117640.18_4	MTFR1L	0.0140639	0.788922	0.859654	0	59.0748	57.5745	61.4041	58.679	59.6072	61.5261	10.1906	9.93178	10.5924	10.1223	10.2824	10.6134	protein_coding	HGNC:28836	OTTHUMG00000007377.8_4
ENSG00000127423.10_3	AUNIP	-0.0288918	0.817212	0.88003	0	6.91656	5.67767	6.62465	7.089	5.63656	6.10193	2.87232	2.35784	2.7511	2.94394	2.34077	2.53403	protein_coding	HGNC:28363	OTTHUMG00000007372.2_3
ENSG00000182749.5_3	PAQR7	0.579874	0.003238	0.016802	0	1.92018	2.20798	2.01766	2.64864	3.40671	3.14219	0.582401	0.669695	0.611968	0.803348	1.03328	0.953046	protein_coding	HGNC:23146	OTTHUMG00000007373.1_3
ENSG00000117632.23_4	STMN1	-0.727307	1.24462e-06	9.72438e-05	-1	422.302	387.251	387.189	232.788	246.481	243.591	67.6008	61.9898	61.98	37.264	39.4559	38.9932	protein_coding	HGNC:6510	OTTHUMG00000007389.4_4
ENSG00000158006.14_3	PAFAH2	0.0152322	0.847936	0.902454	0	14.754	12.8211	13.3334	13.1848	14.0398	14.1095	3.88775	3.37843	3.5134	3.47425	3.69955	3.71791	protein_coding	HGNC:8579	OTTHUMG00000007437.4_3
ENSG00000175087.10_5	PDIK1L	-0.475114	0.00674099	0.0279641	0	10.8157	8.36807	7.83524	6.68002	6.77213	5.96003	2.37186	1.8351	1.71826	1.46492	1.48512	1.30702	protein_coding	HGNC:18981	OTTHUMG00000007511.3_5
ENSG00000142684.9_4	ZNF593	0.143123	0.269137	0.398715	0	13.0494	17.1258	18.0581	16.6514	19.1808	17.4949	17.827	23.3959	24.6695	22.7478	26.2033	23.9002	protein_coding	HGNC:30943	OTTHUMG00000007538.4_4
ENSG00000130695.15_4	CEP85	-0.132945	0.0742341	0.155628	0	35.3273	39.2056	39.2435	35.3282	32.7457	35.6993	6.86635	7.62014	7.6275	6.86651	6.36458	6.93865	protein_coding	HGNC:25309	OTTHUMG00000003380.6_4
ENSG00000142669.15_4	SH3BGRL3	0.281749	0.00188583	0.0115317	0	296.511	271.545	283.431	345.959	363.548	325.612	338.483	309.983	323.551	394.93	415.009	371.703	protein_coding	HGNC:15568	OTTHUMG00000003381.3_4
ENSG00000158062.20_4	UBXN11	0.467387	0.0159087	0.050852	0	26.04	22.822	23.9597	42.5925	26.3659	31.6652	5.53571	4.85162	5.09348	9.05452	5.605	6.73154	protein_coding	HGNC:30600	OTTHUMG00000003382.13_4
ENSG00000117682.17_4	DHDDS	0.164507	0.0298881	0.0805399	0	36.3266	37.48	41.1098	41.8719	44.535	42.4297	6.47764	6.68332	7.33057	7.46645	7.94134	7.56593	protein_coding	HGNC:20603	OTTHUMG00000003554.8_4
ENSG00000198830.11_3	HMGN2	-0.22747	0.00539419	0.0238843	0	264.808	237.683	260.362	225.485	215.882	210.202	83.038	74.5321	81.6438	70.7071	67.696	65.9149	protein_coding	HGNC:4986	OTTHUMG00000003555.4_3
ENSG00000117676.14_6	RPS6KA1	0.620246	0.000413201	0.004142	1	18.0066	13.9344	13.6528	24.7531	22.9798	22.2792	3.06026	2.36819	2.32033	4.20685	3.90548	3.7864	protein_coding	HGNC:10430	OTTHUMG00000004003.5_6
ENSG00000117713.20_6	ARID1A	-0.0302339	0.71488	0.803564	0	90.9929	110.659	107.289	106.783	96.5029	99.273	5.70882	6.94265	6.73123	6.69948	6.05451	6.22831	protein_coding	HGNC:11110	OTTHUMG00000004004.13_6
ENSG00000060642.10_6	PIGV	0.22134	0.0202127	0.0602111	0	9.2678	8.36807	9.16354	10.3609	10.2614	10.6226	2.74033	2.4743	2.7095	3.06353	3.03413	3.14093	protein_coding	HGNC:26031	OTTHUMG00000004005.6_6
ENSG00000204160.12_5	ZDHHC18	0.221604	0.00140124	0.0094894	0	45.5944	46.0522	44.8761	53.6349	53.186	52.3631	8.35063	8.43447	8.21907	9.82325	9.74103	9.59031	protein_coding	HGNC:20712	OTTHUMG00000004092.6_5
ENSG00000142751.15_3	GPN2	0.127243	0.0722609	0.152449	0	32.9369	32.8043	32.7365	37.8015	36.5035	33.2464	6.63249	6.60578	6.59213	7.61207	7.35068	6.69481	protein_coding	HGNC:25513	OTTHUMG00000004227.5_3
ENSG00000198746.13_4	GPATCH3	0.263313	0.00688199	0.0283341	0	13.9311	14.6766	15.7546	17.2551	18.8298	17.1908	6.25835	6.59326	7.07752	7.75162	8.45905	7.72274	protein_coding	HGNC:25720	OTTHUMG00000004229.4_4
ENSG00000090273.14_4	NUDC	-0.00349062	0.951664	0.968666	0	134.432	139.455	149.34	140.086	144.259	137.892	47.2023	48.9661	52.4369	49.1874	50.6527	48.417	protein_coding	HGNC:8045	OTTHUMG00000004226.12_4
ENSG00000253368.4_5	TRNP1	1.13286	3.10593e-05	0.000748984	1	2.4688	2.95016	3.21144	5.51151	6.99925	6.46683	1.2475	1.49073	1.62276	2.785	3.53676	3.26773	protein_coding	HGNC:34348	OTTHUMG00000004277.5_5
ENSG00000158246.8_4	TENT5B	-1.22894	0.000359281	0.00374643	-1	4.46735	6.36419	7.66711	2.12281	2.93184	2.85838	1.87546	2.67178	3.21877	0.891187	1.23083	1.19999	protein_coding	HGNC:28273	OTTHUMG00000004278.4_4
ENSG00000090020.11_3	SLC9A1	0.315908	0.00148423	0.00980856	0	33.9362	33.361	32.6356	44.4816	37.8661	42.0243	5.478	5.38514	5.26806	7.18024	6.11237	6.78358	protein_coding	HGNC:11071	OTTHUMG00000004271.5_3
ENSG00000142784.16_3	WDTC1	-0.195171	0.0075408	0.0300862	0	63.0132	66.6848	69.0208	57.1794	60.082	56.3365	10.6603	11.2815	11.6767	9.6734	10.1644	9.53078	protein_coding	HGNC:29175	OTTHUMG00000004273.8_3
ENSG00000186501.14_4	TMEM222	0.0407085	0.45568	0.586126	0	50.4341	52.3422	52.6945	52.1353	55.5191	52.282	11.2677	11.694	11.7727	11.6478	12.4037	11.6805	protein_coding	HGNC:25363	OTTHUMG00000004410.6_4
ENSG00000241547.1_4	ACTG1P20	0.0419026	0.801582	0.868809	0	2.89986	3.54391	4.38841	3.40818	3.96418	3.81117	6.19628	7.57245	9.37694	7.28243	8.47046	8.14353	processed_pseudogene	HGNC:51500	OTTHUMG00000004411.1_4
ENSG00000142733.17_6	MAP3K6	0.580205	9.09401e-06	0.00032808	0	17.1836	18.2019	18.697	27.6549	26.1801	27.0431	2.99054	3.16776	3.25391	4.8129	4.55623	4.70642	protein_coding	HGNC:6858	OTTHUMG00000004631.11_6
ENSG00000181773.7_3	GPR3	0.239698	0.0711615	0.150862	0	3.85995	3.41402	3.59816	4.45984	4.54229	3.83145	1.80625	1.59758	1.68374	2.08696	2.12554	1.79291	protein_coding	HGNC:4484	OTTHUMG00000003397.3_3
ENSG00000158195.11_3	WASF2	0.188478	0.00792397	0.0311118	0	150.656	163.984	164.456	179.718	184.974	181.294	26.566	28.9163	28.9995	31.6907	32.6176	31.9687	protein_coding	HGNC:12733	OTTHUMG00000003393.4_3
ENSG00000126705.14_5	AHDC1	0.174533	0.0406583	0.100637	0	40.1082	41.2466	44.5062	51.3758	43.9776	46.7072	4.83406	4.97127	5.36413	6.19209	5.30042	5.6294	protein_coding	HGNC:25230	OTTHUMG00000003398.5_5
ENSG00000126709.15_3	IFI6	0.250732	0.057341	0.129676	0	7.46518	7.4589	7.70073	7.59536	10.1995	9.14276	8.86601	8.85855	9.14576	9.02062	12.1134	10.8584	protein_coding	HGNC:4054	OTTHUMG00000003518.2_3
ENSG00000009780.15_4	FAM76A	-0.0672108	0.591524	0.702692	0	12.4812	10.9286	9.14672	10.2245	9.62139	11.1903	3.09399	2.70912	2.26741	2.53459	2.38507	2.77399	protein_coding	HGNC:28530	OTTHUMG00000003729.4_4
ENSG00000117758.14_4	STX12	-0.27996	0.00219889	0.0128705	0	102.24	109.601	105.187	79.7708	91.7955	89.5626	26.8981	28.8349	27.6736	20.9868	24.1503	23.5629	protein_coding	HGNC:11430	OTTHUMG00000003730.3_4
ENSG00000117751.18_4	PPP1R8	-0.0640576	0.229112	0.353851	0	82.9595	82.6417	86.0532	77.5506	82.7315	80.4604	29.4705	29.3576	30.5695	27.5491	29.3895	28.5827	protein_coding	HGNC:9296	OTTHUMG00000003734.5_4
ENSG00000130775.16_3	THEMIS2	0.145765	0.420181	0.551721	0	1.29318	1.18749	1.27785	1.61645	1.38333	1.15552	0.279849	0.256976	0.276531	0.349805	0.299358	0.250057	protein_coding	HGNC:16839	OTTHUMG00000003735.6_3
ENSG00000117748.10_3	RPA2	-0.143396	0.0429853	0.104785	0	56.3513	52.973	53.7034	49.8567	51.6995	46.0382	28.4459	26.7406	27.1092	25.1675	26.0977	23.2399	protein_coding	HGNC:10290	OTTHUMG00000003915.4_3
ENSG00000158161.16_5	EYA3	0.00522864	0.926462	0.952866	0	29.0378	30.7262	30.4498	30.5567	29.3184	30.6718	4.5202	4.78304	4.74001	4.75665	4.56388	4.77457	protein_coding	HGNC:3521	OTTHUMG00000003916.2_5
ENSG00000126698.11_3	DNAJC8	-0.0385996	0.516673	0.637799	0	151.929	157.082	165.515	146.824	159.455	155.751	52.5343	54.3161	57.2321	50.7691	55.1365	53.8559	protein_coding	HGNC:15470	OTTHUMG00000003538.4_3
ENSG00000130770.18_4	ATP5IF1	-0.184022	0.010775	0.0385672	0	74.3383	67.7238	74.6198	63.1584	65.285	62.2965	33.4105	30.4377	33.537	28.3858	29.3416	27.9984	protein_coding	HGNC:871	OTTHUMG00000003533.3_4
ENSG00000270605.1_6	AL353622.1	0.214268	0.320771	0.452902	0	0.979682	1.11327	0.739808	1.20747	0.970397	1.0947	0.503693	0.572375	0.380364	0.620806	0.498919	0.562827	lncRNA	NA	OTTHUMG00000185161.1_6
ENSG00000130766.5_3	SESN2	0.307805	0.000584092	0.00528194	0	52.8049	49.3735	50.4751	61.2887	66.6477	61.0193	15.2527	14.2615	14.5798	17.7033	19.2512	17.6255	protein_coding	HGNC:20746	OTTHUMG00000003532.2_3
ENSG00000130772.14_3	MED18	-0.0436941	0.512074	0.634259	0	16.8897	16.3651	17.5368	17.0993	16.0632	16.1164	8.37369	8.11356	8.69451	8.47759	7.96389	7.99028	protein_coding	HGNC:25944	OTTHUMG00000003537.3_3
ENSG00000204138.13_4	PHACTR4	-0.132953	0.0295274	0.079829	0	66.2069	67.1672	67.104	63.801	59.4007	59.6205	9.04837	9.17961	9.17097	8.71956	8.11818	8.14822	protein_coding	HGNC:25793	OTTHUMG00000003541.8_4
ENSG00000180198.16_5	RCC1	0.170476	0.00963996	0.0356332	0	90.5422	95.1103	98.7644	107.367	108.106	104.645	23.2876	24.4625	25.4024	27.615	27.8051	26.9149	protein_coding	HGNC:1913	OTTHUMG00000003645.13_5
ENSG00000242125.3_5	SNHG3	0.485388	0.000325041	0.00352857	0	26.5102	30.4479	27.6419	43.6636	36.937	37.8279	6.48488	7.44812	6.76173	10.6809	9.03548	9.25341	lncRNA	HGNC:10118	OTTHUMG00000003657.2_5
ENSG00000180098.9_3	TRNAU1AP	-0.0909336	0.138966	0.24587	0	21.8273	22.4695	22.3792	20.6633	21.3487	20.5966	5.06317	5.21213	5.19119	4.79315	4.95216	4.77768	protein_coding	HGNC:30813	OTTHUMG00000003653.2_3
ENSG00000197989.14_6	SNHG12	0.788885	0.000770608	0.00629359	1	17.3208	17.8123	16.9652	37.3341	22.8353	29.8001	4.06019	4.17541	3.97683	8.75155	5.35286	6.9855	lncRNA	HGNC:30062	OTTHUMG00000003654.4_6
ENSG00000120656.11_2	TAF12	0.24448	0.00769925	0.0304606	0	18.9079	19.8904	17.9572	21.1891	23.7644	22.2792	8.09066	8.51108	7.68386	9.0668	10.1688	9.53323	protein_coding	HGNC:11545	OTTHUMG00000003655.1_2
ENSG00000188060.7_3	RAB42	0.634798	0.00322808	0.016776	1	4.60451	3.08004	3.61497	5.45308	6.44179	5.63567	2.09296	1.40002	1.64317	2.47867	2.92808	2.56167	protein_coding	HGNC:28702	OTTHUMG00000003656.2_3
ENSG00000162419.12_2	GMEB1	-0.126401	0.0795563	0.163965	0	19.2606	20.4285	18.8987	18.5794	17.4465	17.6368	2.98197	3.16279	2.92596	2.87652	2.70112	2.73058	protein_coding	HGNC:4370	OTTHUMG00000003647.2_2
ENSG00000198492.16_6	YTHDF2	-0.099611	0.0668264	0.144553	0	116.171	111.475	114.536	104.173	109.118	106.064	31.1533	29.8942	30.7149	27.936	29.262	28.4431	protein_coding	HGNC:31675	OTTHUMG00000003648.6_6
ENSG00000116329.11_3	OPRD1	0.775994	0.0120037	0.0417838	1	3.78157	2.13377	2.01766	5.2778	3.90224	4.33825	0.404663	0.228332	0.215908	0.564773	0.417575	0.464232	protein_coding	HGNC:8153	OTTHUMG00000003646.3_3
ENSG00000159023.21_6	EPB41	-0.479315	6.63886e-05	0.00119845	0	42.7729	47.5922	47.3309	31.0631	33.5716	34.1587	2.1394	2.38045	2.36738	1.5537	1.67917	1.70853	protein_coding	HGNC:3377	OTTHUMG00000003644.30_6
ENSG00000116350.17_6	SRSF4	-0.00971978	0.867165	0.91565	0	94.1083	103.293	101.118	102.693	98.8773	94.955	10.6868	11.7298	11.4829	11.6617	11.2284	10.783	protein_coding	HGNC:10786	OTTHUMG00000003663.7_6
ENSG00000116353.15_3	MECR	0.00380225	0.957335	0.972629	0	22.8462	24.5847	26.3641	23.9936	25.5194	24.5091	5.82514	6.26841	6.7221	6.11768	6.50673	6.24913	protein_coding	HGNC:19691	OTTHUMG00000059082.4_3
ENSG00000060656.20_4	PTPRU	-0.235352	0.0196991	0.0591185	0	85.2912	94.2382	95.5194	87.1909	74.4109	72.0474	12.7643	14.1033	14.295	13.0486	11.136	10.7823	protein_coding	HGNC:9683	OTTHUMG00000003699.8_4
ENSG00000223382.5_6	LINC01778	-0.547821	0.0328737	0.0862729	0	1.21481	0.890615	0.907947	0.70111	0.784577	0.567622	0.575465	0.421892	0.430103	0.332122	0.371661	0.268888	lncRNA	HGNC:52568	OTTHUMG00000003749.16_6
ENSG00000162512.16_5	SDC3	-0.529377	7.5973e-06	0.000293758	0	646.571	654.342	659.775	450.989	468.186	439.299	91.5175	92.6174	93.3864	63.8343	66.2683	62.1796	protein_coding	HGNC:10660	OTTHUMG00000043646.2_5
ENSG00000134644.15_4	PUM1	-0.0585793	0.296666	0.427385	0	106.452	115.928	105.961	104.582	105.071	105.618	16.078	17.5092	16.0037	15.7955	15.8694	15.952	protein_coding	HGNC:14957	OTTHUMG00000003795.5_4
ENSG00000084628.10_3	NKAIN1	0.0462092	0.636458	0.740941	0	7.21046	7.53312	7.76799	7.65379	8.48581	7.11554	2.17183	2.26901	2.33976	2.30536	2.55597	2.14324	protein_coding	HGNC:25743	OTTHUMG00000003788.5_3
ENSG00000060688.13_4	SNRNP40	-0.186777	0.00823613	0.0319831	0	62.5625	63.5305	66.5659	55.1735	59.1116	54.9985	16.0953	16.3444	17.1253	14.1944	15.2075	14.1493	protein_coding	HGNC:30857	OTTHUMG00000003790.3_4
ENSG00000121766.15_4	ZCCHC17	-0.00763482	0.886498	0.927682	0	79.9813	73.9767	76.6879	74.2398	78.3544	76.8316	41.6352	38.5095	39.9208	38.6464	40.7883	39.9957	protein_coding	HGNC:30246	OTTHUMG00000003791.2_4
ENSG00000121769.7_3	FABP3	1.56039	2.52182e-05	0.000664372	1	0.862121	1.03905	1.36192	2.99919	3.63383	3.0611	0.840273	1.01272	1.32741	2.92319	3.54174	2.98353	protein_coding	HGNC:3557	OTTHUMG00000003797.4_3
ENSG00000168528.12_4	SERINC2	0.0590802	0.540683	0.659361	0	193.722	163.205	168.189	202.251	180.824	163.941	56.1189	47.2784	48.7221	58.5895	52.3825	47.4917	protein_coding	HGNC:23231	OTTHUMG00000003796.3_4
ENSG00000142910.16_3	TINAGL1	-0.0107387	0.969617	0.980117	0	0.999276	1.00194	0.874319	1.30484	0.949751	0.587894	0.189221	0.189726	0.165559	0.247083	0.179843	0.111322	protein_coding	HGNC:19168	OTTHUMG00000003884.2_3
ENSG00000162517.13_3	PEF1	-0.00760011	0.892798	0.932276	0	87.3289	88.6162	92.2407	85.2044	93.8601	87.7381	39.2843	39.8633	41.4938	38.3286	42.2223	39.4683	protein_coding	HGNC:30009	OTTHUMG00000003877.3_3
ENSG00000084636.18_5	COL16A1	0.30925	0.150397	0.26116	0	3.68361	3.20992	2.62296	4.92725	3.09701	3.73009	0.398099	0.346906	0.283471	0.532503	0.334704	0.403122	protein_coding	HGNC:2193	OTTHUMG00000003883.24_5
ENSG00000121753.12_5	ADGRB2	-0.184546	0.0592511	0.132701	0	122.108	104.666	112.535	111.107	94.1079	93.3129	15.7436	13.4948	14.5094	14.3252	12.1336	12.0311	protein_coding	HGNC:944	OTTHUMG00000003885.6_5
ENSG00000134668.12_4	SPOCD1	0.223416	0.0658444	0.143017	0	27.294	29.7243	29.6764	39.5348	29.2771	32.395	3.85236	4.19538	4.18863	5.58008	4.13226	4.57233	protein_coding	HGNC:26338	OTTHUMG00000003879.6_4
ENSG00000184007.21_6	PTP4A2	-0.174941	0.021788	0.0636691	0	235.026	212.857	205.028	189.904	194.678	193.741	35.0366	31.7318	30.5647	28.31	29.0218	28.8821	protein_coding	HGNC:9635	OTTHUMG00000003801.16_6
ENSG00000121774.18_3	KHDRBS1	-0.431601	2.17305e-05	0.00059888	0	212.591	202.448	198.706	148.986	153.529	152.528	59.9862	57.1241	56.0682	42.0389	43.3209	43.0384	protein_coding	HGNC:18116	OTTHUMG00000003921.10_3
ENSG00000121775.18_3	TMEM39B	0.101055	0.15121	0.262097	0	23.0225	23.0261	23.5898	26.2916	25.1477	23.2522	8.26069	8.26197	8.46423	9.43367	9.02323	8.3431	protein_coding	HGNC:25510	OTTHUMG00000004020.10_3
ENSG00000025800.14_4	KPNA6	0.0994482	0.0731165	0.153803	0	79.9813	84.9239	83.6824	89.0605	86.9641	90.3127	10.7257	11.3885	11.222	11.9432	11.6621	12.1111	protein_coding	HGNC:6399	OTTHUMG00000004333.6_4
ENSG00000084652.16_3	TXLNA	0.187206	0.00621992	0.0265021	0	43.3412	41.9331	44.1027	48.2987	48.2515	50.7616	8.475	8.19967	8.62391	9.44441	9.43517	9.92601	protein_coding	HGNC:30685	OTTHUMG00000004423.7_3
ENSG00000160050.14_3	CCDC28B	-0.0627976	0.455315	0.585766	0	28.2932	33.1197	33.51	28.5313	31.8992	30.4894	10.0402	11.7529	11.8914	10.1247	11.3198	10.8195	protein_coding	HGNC:28163	OTTHUMG00000005738.8_3
ENSG00000224066.1_6	AL049795.1	0.338048	0.253197	0.380769	0	1.27359	1.2246	0.739808	1.7333	0.970397	1.35824	0.938531	0.902429	0.545179	1.2773	0.715105	1.00091	lncRNA	NA	OTTHUMG00000005740.3_6
ENSG00000160051.11_3	IQCC	-0.0889567	0.44684	0.577798	0	6.85778	6.21575	6.38926	6.87478	5.3888	6.02084	2.76746	2.50837	2.57839	2.77432	2.17466	2.42972	protein_coding	HGNC:25545	OTTHUMG00000005739.4_3
ENSG00000160055.19_2	TMEM234	0.202319	0.0458197	0.109988	0	17.6735	15.8826	16.2758	21.2475	17.591	18.468	4.94917	4.44767	4.55777	5.95002	4.92608	5.17165	protein_coding	HGNC:28837	OTTHUMG00000005742.6_2
ENSG00000084623.11_2	EIF3I	0.0757494	0.321582	0.453578	0	218.685	233.174	246.407	228.309	264.216	243.429	126.774	135.173	142.844	132.353	153.169	141.118	protein_coding	HGNC:3272	OTTHUMG00000007364.5_2
ENSG00000220785.7_4	MTMR9LP	1.02043	0.00500215	0.0226476	1	5.58419	3.45113	3.17781	11.2372	6.19403	7.23718	1.88591	1.16553	1.07322	3.79508	2.09187	2.44417	transcribed_unprocessed_pseudogene	HGNC:27920	OTTHUMG00000007461.5_4
ENSG00000116478.12_5	HDAC1	-0.242777	0.00307481	0.0162011	0	105.257	101.14	103.22	91.456	80.7081	89.4815	26.5399	25.5019	26.0262	23.06	20.35	22.5622	protein_coding	HGNC:4852	OTTHUMG00000007529.6_5
ENSG00000175130.7_3	MARCKSL1	-0.166594	0.0160346	0.051129	0	696.221	670.596	687.501	605.935	630.676	593.671	450.337	433.762	444.696	391.937	407.94	384.005	protein_coding	HGNC:7142	OTTHUMG00000007589.4_3
ENSG00000225828.1_5	FAM229A	0.608579	0.0285756	0.0780007	0	3.66401	2.82028	3.14419	6.52422	3.32413	4.80451	1.28788	0.991311	1.10516	2.29322	1.16841	1.68876	protein_coding	HGNC:44652	OTTHUMG00000007587.6_5
ENSG00000160058.18_2	BSDC1	0.0866345	0.0993377	0.192277	0	92.2665	96.0194	97.4193	99.9082	101.974	101.523	14.7132	15.3117	15.5349	15.9318	16.2613	16.1893	protein_coding	HGNC:25501	OTTHUMG00000007588.7_2
ENSG00000273274.2_4	ZBTB8B	-0.27074	0.1235	0.225236	0	1.92018	1.96677	1.56369	1.40222	1.44527	1.66232	0.149651	0.153283	0.121868	0.109284	0.112639	0.129555	protein_coding	HGNC:37057	OTTHUMG00000167087.3_4
ENSG00000160062.15_4	ZBTB8A	-0.143913	0.229738	0.354553	0	6.87737	6.30852	5.56538	5.68678	5.24427	6.02084	0.971792	0.891412	0.786403	0.803559	0.741031	0.850762	protein_coding	HGNC:24172	OTTHUMG00000007855.7_4
ENSG00000176261.15_5	ZBTB8OS	-0.0679295	0.28937	0.419527	0	26.2751	24.362	26.2296	23.643	25.0032	24.6915	7.44126	6.89947	7.42837	6.69584	7.08106	6.99279	protein_coding	HGNC:24094	OTTHUMG00000007856.9_5
ENSG00000162521.19_6	RBBP4	-0.269686	0.000441107	0.00432969	0	262.143	266.851	264.851	218.902	216.213	223.379	27.6815	28.1785	27.9674	23.1153	22.8313	23.5881	protein_coding	HGNC:9887	OTTHUMG00000007998.14_6
ENSG00000162520.14_5	SYNC	0.448656	0.0095965	0.0354917	0	27.5487	36.7379	36.1834	38.1521	50.2129	48.856	7.90039	10.5357	10.3766	10.9412	14.4	14.0109	protein_coding	HGNC:28897	OTTHUMG00000008087.6_5
ENSG00000162522.11_3	KIAA1522	0.609456	4.45887e-06	0.000220892	1	36.8165	40.0962	40.1178	60.6071	60.9699	57.0054	6.11569	6.6605	6.66409	10.0676	10.1279	9.46934	protein_coding	HGNC:29301	OTTHUMG00000008088.7_3
ENSG00000134684.10_2	YARS	0.12046	0.140354	0.247653	0	123.734	138.899	144.902	138.684	156.977	147.419	15.0674	16.9141	17.6451	16.8879	19.1156	17.9517	protein_coding	HGNC:12840	OTTHUMG00000003933.2_2
ENSG00000116497.18_4	S100PBP	-0.086483	0.255739	0.383454	0	36.9928	33.027	33.0728	34.3544	30.4746	32.2328	4.02533	3.59379	3.59878	3.73824	3.31606	3.50738	protein_coding	HGNC:25768	OTTHUMG00000003955.9_4
ENSG00000160097.18_5	FNDC5	0.830877	0.000836839	0.00667178	1	1.5283	1.55858	1.26104	2.49284	2.2505	2.98001	0.477744	0.487207	0.394197	0.779255	0.7035	0.931545	protein_coding	HGNC:20240	OTTHUMG00000004015.6_5
ENSG00000121900.19_3	TMEM54	0.0691163	0.431098	0.562926	0	21.5334	23.7683	25.5066	22.9419	26.6343	24.7524	15.1965	16.7737	18.0004	16.1905	18.7963	17.4681	protein_coding	HGNC:24143	OTTHUMG00000004016.4_3
ENSG00000116514.16_3	RNF19B	0.471975	6.99758e-05	0.00124419	0	24.2765	21.4675	22.8164	31.1605	32.8903	31.0367	9.30135	8.22511	8.7419	11.9389	12.6016	11.8915	protein_coding	HGNC:26886	OTTHUMG00000004013.4_3
ENSG00000004455.16_2	AK2	-0.0356127	0.470132	0.598242	0	95.3427	96.2235	100.093	93.2672	96.6268	94.6712	16.6479	16.8017	17.4773	16.2855	16.8721	16.5307	protein_coding	HGNC:362	OTTHUMG00000004131.6_2
ENSG00000142920.17_3	AZIN2	0.715644	2.79787e-05	0.000697979	1	4.76126	5.08393	4.99371	7.88749	8.52711	7.96698	0.496948	0.530626	0.521209	0.823243	0.890002	0.831539	protein_coding	HGNC:29957	OTTHUMG00000004130.6_3
ENSG00000116525.14_3	TRIM62	0.45116	0.00100986	0.00753883	0	12.7555	10.6317	11.6015	17.3525	15.1547	15.3055	3.20811	2.67397	2.91789	4.36431	3.81155	3.84948	protein_coding	HGNC:25574	OTTHUMG00000004132.5_3
ENSG00000160094.15_5	ZNF362	0.0170965	0.838121	0.895773	0	30.5465	29.1491	28.3145	31.9589	30.8256	26.2525	9.02674	8.6138	8.36717	9.44413	9.10922	7.75783	protein_coding	HGNC:18079	OTTHUMG00000004124.6_5
ENSG00000134686.18_4	PHC2	0.0638616	0.347823	0.481713	0	398.104	370.199	373.351	418.641	402.426	372.238	80.0209	74.4119	75.0454	84.1489	80.8896	74.8217	protein_coding	HGNC:3183	OTTHUMG00000004133.1_4
ENSG00000121903.14_2	ZSCAN20	0.257882	0.0274259	0.0756036	0	6.13281	6.67961	6.8096	8.14067	8.23805	7.09527	1.15539	1.2584	1.28289	1.53366	1.55201	1.33671	protein_coding	HGNC:13093	OTTHUMG00000004173.3_2
ENSG00000121904.17_3	CSMD2	-0.257221	0.0341635	0.0889447	0	87.7991	83.2539	80.5046	82.7115	62.3738	65.3373	4.83555	4.58523	4.43381	4.55535	3.43525	3.59846	protein_coding	HGNC:19290	OTTHUMG00000011135.10_3
ENSG00000142698.15_4	C1orf94	-0.330457	0.00031865	0.0034911	0	39.344	36.1812	37.1081	29.1545	30.3714	30.0434	11.7832	10.8359	11.1135	8.73151	9.09595	8.99773	protein_coding	HGNC:28250	OTTHUMG00000004012.5_4
ENSG00000163866.9_4	SMIM12	0.0875193	0.174281	0.290178	0	40.5197	42.5825	43.8168	42.4951	46.3726	46.0179	3.91987	4.11943	4.23884	4.11097	4.48608	4.45177	protein_coding	HGNC:25154	OTTHUMG00000004375.4_4
ENSG00000243749.1_4	TMEM35B	0.503722	0.0162743	0.0516602	0	1.17562	1.11327	1.32829	1.44117	1.87885	1.8245	1.27507	1.20745	1.44066	1.56309	2.0378	1.97885	protein_coding	HGNC:40021	OTTHUMG00000004158.1_4
ENSG00000163867.17_5	ZMYM6	-0.0843029	0.56927	0.683794	0	7.87665	7.16203	5.49812	6.64107	5.82238	6.87228	0.823228	0.74854	0.574637	0.694092	0.608527	0.718256	protein_coding	HGNC:13050	OTTHUMG00000004163.6_5
ENSG00000197056.11_4	ZMYM1	-0.302742	0.0425574	0.10402	0	11.1096	8.90615	8.64231	7.59536	6.93731	8.6765	2.13441	1.71108	1.66039	1.45924	1.33282	1.66696	protein_coding	HGNC:26253	OTTHUMG00000004374.6_4
ENSG00000116560.11_3	SFPQ	-0.187493	0.0153587	0.0496923	0	342.281	335.966	340.026	317.7	278.339	298.123	46.1358	45.2845	45.8318	42.8225	37.517	40.1837	protein_coding	HGNC:10774	OTTHUMG00000004157.8_3
ENSG00000146463.11_3	ZMYM4	-0.158216	0.00889183	0.0337248	0	120.912	119.25	119.294	106.296	105.195	110.625	15.8117	15.5943	15.6001	13.9004	13.7564	14.4665	protein_coding	HGNC:13055	OTTHUMG00000004241.5_3
ENSG00000142687.18_4	KIAA0319L	-0.0756811	0.175904	0.291817	0	137.038	144.484	148.87	136.054	137.734	134.628	14.2466	15.0207	15.4766	14.1443	14.319	13.996	protein_coding	HGNC:30071	OTTHUMG00000004370.7_4
ENSG00000020129.16_4	NCDN	0.103648	0.0701787	0.149336	0	65.3252	66.2952	69.6261	72.7597	73.1514	70.3445	13.2856	13.4828	14.1603	14.7976	14.8772	14.3064	protein_coding	HGNC:17597	OTTHUMG00000059204.4_4
ENSG00000126067.12_3	PSMB2	-0.0892484	0.130744	0.234817	0	185.571	186.899	195.948	172.064	185.139	177.139	40.9831	41.2763	43.2748	38	40.8877	39.1207	protein_coding	HGNC:9539	OTTHUMG00000004169.3_3
ENSG00000142686.8_3	C1orf216	0.0808038	0.729865	0.815381	0	2.31205	2.70895	2.45482	3.6224	1.8995	2.37185	0.758298	0.888473	0.805123	1.18806	0.622991	0.77791	protein_coding	HGNC:26800	OTTHUMG00000004167.4_3
ENSG00000092853.14_4	CLSPN	-0.100924	0.229484	0.354305	0	40.4413	37.6099	37.478	39.9438	33.3032	34.4425	4.21659	3.92138	3.90762	4.16472	3.47234	3.59112	protein_coding	HGNC:19715	OTTHUMG00000004168.7_4
ENSG00000134698.11_3	AGO4	-0.252243	0.00401153	0.019471	0	25.0603	24.6403	23.573	21.6176	19.4079	20.4749	3.37603	3.31946	3.17567	2.91224	2.61457	2.75831	protein_coding	HGNC:18424	OTTHUMG00000004243.5_3
ENSG00000092847.12_5	AGO1	-0.55729	2.72749e-06	0.000164286	0	100.966	107.894	103.893	72.9544	69.6621	69.9188	7.26898	7.76777	7.47967	5.2523	5.01527	5.03375	protein_coding	HGNC:3262	OTTHUMG00000007381.6_5
ENSG00000126070.20_3	AGO3	-0.146815	0.212111	0.334124	0	19.0842	18.0164	16.3262	18.7352	14.6798	14.7987	0.902199	0.851718	0.771816	0.885701	0.693984	0.699603	protein_coding	HGNC:18421	OTTHUMG00000184172.5_3
ENSG00000092850.12_4	TEKT2	-0.0732452	0.657341	0.758731	0	1.76343	1.70701	1.56369	1.85015	1.38333	1.54069	0.900168	0.871369	0.798206	0.944437	0.706142	0.786466	protein_coding	HGNC:11725	OTTHUMG00000007629.4_4
ENSG00000116863.11_3	ADPRHL2	0.136311	0.0548697	0.125604	0	43.3216	44.4009	47.684	47.286	52.0092	49.5655	26.2396	26.8933	28.8819	28.6408	31.5016	30.0215	protein_coding	HGNC:21304	OTTHUMG00000007628.3_3
ENSG00000054116.12_3	TRAPPC3	0.107489	0.164811	0.278549	0	61.1714	61.5452	67.9279	62.9831	72.8417	69.6147	17.3437	17.4497	19.2594	17.8574	20.6526	19.7377	protein_coding	HGNC:19942	OTTHUMG00000007664.4_3
ENSG00000116871.15_7	MAP7D1	0.0537684	0.35095	0.48486	0	233.811	240.596	247.399	257.502	252.592	239.131	44.358	45.6452	46.9358	48.8526	47.9211	45.3673	protein_coding	HGNC:25514	OTTHUMG00000007714.6_7
ENSG00000054118.15_6	THRAP3	0.0367776	0.536974	0.656373	0	167.389	179.162	182.279	187.547	173.412	181.538	35.4637	37.9581	38.6184	39.7345	36.7398	38.4614	protein_coding	HGNC:22964	OTTHUMG00000007866.8_6
ENSG00000214193.10_6	SH3D21	0.660774	0.0157402	0.0505002	0	2.72352	2.87594	2.60614	5.82311	3.03507	4.09498	0.608743	0.642813	0.582509	1.30154	0.67838	0.915285	protein_coding	HGNC:26236	OTTHUMG00000007868.9_6
ENSG00000142694.6_2	EVA1B	0.328966	0.00179296	0.0111229	0	13.9703	12.6542	13.9555	17.7615	17.1368	16.0759	11.5361	10.4493	11.5239	14.6668	14.151	13.2749	protein_coding	HGNC:25558	OTTHUMG00000007867.1_2
ENSG00000116883.8_7	AL591845.1	0.586576	0.0934937	0.184066	0	1.2344	0.983387	0.706181	1.98648	0.908457	1.4596	0.671599	0.535031	0.384212	1.08078	0.494264	0.794123	lncRNA	NA	OTTHUMG00000184623.1_7
ENSG00000196182.10_3	STK40	-0.0412891	0.526003	0.646882	0	103.2	103.905	107.558	110.717	98.5882	96.4754	18.4615	18.5877	19.2412	19.8063	17.6365	17.2586	protein_coding	HGNC:21373	OTTHUMG00000008238.4_3
ENSG00000181817.6_3	LSM10	0.10382	0.127558	0.230855	0	37.8745	40.3931	40.0842	40.4112	45.2164	41.5783	25.1491	26.8214	26.6163	26.8335	30.0242	27.6084	protein_coding	HGNC:17562	OTTHUMG00000008140.2_3
ENSG00000116885.18_4	OSCP1	0.0977397	0.173886	0.289627	0	11.0508	10.8729	10.929	11.6073	11.8719	11.6768	3.96371	3.8999	3.92001	4.1633	4.25821	4.18823	protein_coding	HGNC:29971	OTTHUMG00000008139.6_4
ENSG00000116898.12_3	MRPS15	0.210477	0.0123962	0.0426614	0	50.3753	52.7689	57.6714	60.1007	65.4708	60.5531	17.5953	18.4313	20.1437	20.9922	22.8679	21.1502	protein_coding	HGNC:14504	OTTHUMG00000008042.5_3
ENSG00000233621.2_7	LINC01137	-0.180345	0.1648	0.278549	0	9.32658	7.18058	7.81843	7.65379	7.26766	6.52765	3.08929	2.37846	2.58974	2.53521	2.40731	2.16219	lncRNA	HGNC:49453	OTTHUMG00000004224.3_7
ENSG00000163874.11_4	ZC3H12A	0.340487	0.0229562	0.0660105	0	12.4028	14.4354	14.7121	20.7217	15.1134	16.7854	4.01255	4.67013	4.75966	6.70388	4.88949	5.43041	protein_coding	HGNC:26259	OTTHUMG00000004221.5_4
ENSG00000163875.15_3	MEAF6	-0.172663	0.0105473	0.0379808	0	54.4312	51.7299	50.0211	45.7085	46.5791	46.2612	15.6097	14.8351	14.345	13.1083	13.3579	13.2668	protein_coding	HGNC:25674	OTTHUMG00000004223.3_3
ENSG00000163877.11_3	SNIP1	0.191936	0.0105839	0.0380627	0	16.7526	16.9402	16.4103	18.7352	18.8918	19.6032	2.9298	2.96262	2.86994	3.27653	3.30391	3.42834	protein_coding	HGNC:30587	OTTHUMG00000004225.4_3
ENSG00000163879.11_3	DNALI1	0.232181	0.00879111	0.0334348	0	43.7918	39.0386	39.6302	51.259	46.1661	46.3828	9.8276	8.76091	8.89367	11.5034	10.3604	10.4091	protein_coding	HGNC:14353	OTTHUMG00000004222.5_3
ENSG00000134697.13_6	GNL2	0.0731647	0.255011	0.382572	0	56.9979	62.0276	64.6324	63.7231	66.2761	63.2493	9.91786	10.793	11.2463	11.0881	11.5323	11.0056	protein_coding	HGNC:29925	OTTHUMG00000004322.5_6
ENSG00000116922.14_5	C1orf109	0.022823	0.717191	0.805897	0	18.7511	19.3523	20.5129	19.9816	19.7589	19.8262	4.22894	4.36453	4.62627	4.50646	4.45623	4.47141	protein_coding	HGNC:26039	OTTHUMG00000004323.6_5
ENSG00000134690.11_3	CDCA8	-0.366104	0.000178935	0.00235928	0	61.4653	55.4037	57.8564	46.1954	45.6087	43.7474	25.5467	23.0273	24.0467	19.2001	18.9562	18.1826	protein_coding	HGNC:14629	OTTHUMG00000004320.2_3
ENSG00000185090.14_3	MANEAL	-0.296213	0.000305815	0.00338576	0	65.5016	67.7795	68.4323	53.3233	56.5927	54.37	21.7036	22.4584	22.6747	17.6684	18.7517	18.0153	protein_coding	HGNC:26452	OTTHUMG00000004317.3_3
ENSG00000196449.4_3	YRDC	0.035976	0.697382	0.789739	0	20.9848	25.4567	25.7588	23.7014	26.2214	24.1442	11.3554	13.7753	13.9387	12.8254	14.1891	13.065	protein_coding	HGNC:28905	OTTHUMG00000004318.2_3
ENSG00000197982.14_5	C1orf122	-0.0453333	0.542938	0.661285	0	55.2149	56.5169	62.1607	51.9795	59.9995	56.5797	24.7489	25.3326	27.8623	23.2988	26.8935	25.3607	protein_coding	HGNC:24789	OTTHUMG00000004319.7_5
ENSG00000188786.10_3	MTF1	0.226702	0.00452127	0.0212	0	24.6488	26.2917	24.9013	30.732	28.5338	29.4758	3.08534	3.29099	3.11695	3.84679	3.57164	3.68955	protein_coding	HGNC:7428	OTTHUMG00000004439.3_3
ENSG00000204084.13_4	INPP5B	0.087204	0.238613	0.365143	0	20.0835	19.2224	18.6802	21.9876	20.048	19.5424	2.24899	2.15257	2.09184	2.46222	2.24502	2.1884	protein_coding	HGNC:6077	OTTHUMG00000004436.3_4
ENSG00000183431.12_3	SF3A3	-0.00365791	0.937318	0.958704	0	118.6	117.153	120.152	120.026	117.563	117.417	30.4572	30.0855	30.8556	30.8234	30.1907	30.1532	protein_coding	HGNC:10767	OTTHUMG00000004438.2_3
ENSG00000183386.10_3	FHL3	0.325671	0.0015128	0.00992276	0	34.1321	38.6861	39.3107	47.8313	48.4786	44.2542	17.032	19.3044	19.6161	23.8679	24.1909	22.0829	protein_coding	HGNC:3704	OTTHUMG00000004434.3_3
ENSG00000183520.12_4	UTP11	-0.148348	0.0168928	0.0529033	0	51.7272	49.1323	51.1309	46.3122	46.0216	44.8016	15.2994	14.5319	15.123	13.6978	13.6118	13.251	protein_coding	HGNC:24329	OTTHUMG00000004435.2_4
ENSG00000185668.7_3	POU3F1	0.991537	0.000249431	0.00293501	1	1.17562	1.07616	1.2106	1.967	2.66343	2.27049	0.538287	0.492747	0.554302	0.900643	1.21952	1.0396	protein_coding	HGNC:9214	OTTHUMG00000000485.2_3
ENSG00000224592.5_6	AL139158.2	1.12747	0.000674836	0.00580449	1	0.587809	0.426753	0.470787	0.973764	1.2801	0.993338	0.859371	0.623908	0.688285	1.42363	1.87149	1.45225	lncRNA	NA	OTTHUMG00000000478.1_6
ENSG00000116954.8_3	RRAGC	0.110552	0.217454	0.34015	0	26.5494	29.5758	26.0951	26.5448	31.0114	31.2192	5.18948	5.78105	5.10068	5.18859	6.06165	6.10227	protein_coding	HGNC:19902	OTTHUMG00000000490.3_3
ENSG00000228436.3_7	AL139260.1	0.536412	0.095404	0.186579	0	0.764152	1.52147	1.73182	1.55802	2.27114	2.04749	0.381314	0.759215	0.864184	0.777457	1.1333	1.0217	lncRNA	NA	OTTHUMG00000000491.5_7
ENSG00000214114.9_4	MYCBP	-0.0350428	0.687017	0.781041	0	15.7337	13.619	14.3086	15.3465	13.3997	13.8459	5.67389	4.91128	5.15996	5.53427	4.83222	4.99312	protein_coding	HGNC:7554	OTTHUMG00000000484.8_4
ENSG00000174574.16_4	AKIRIN1	-0.151565	0.0104288	0.0376633	0	105.669	102.198	103.035	91.9818	95.5119	92.4007	39.3112	38.0201	38.3315	34.2194	35.5327	34.3753	protein_coding	HGNC:25744	OTTHUMG00000007496.3_4
ENSG00000168653.11_3	NDUFS5	-0.142926	0.0581909	0.130984	0	105.727	109.471	119.731	95.2926	106	102.091	192.933	199.765	218.488	173.892	193.431	186.297	protein_coding	HGNC:7712	OTTHUMG00000007497.2_3
ENSG00000127603.26_7	MACF1	0.423295	0.000194493	0.00249877	0	476.145	524.776	491.233	707.849	631.584	661.523	11.6877	12.8814	12.058	17.3752	15.5032	16.2381	protein_coding	HGNC:13664	OTTHUMG00000007754.15_7
ENSG00000183682.8_4	BMP8A	3.55115	2.51507e-08	1.10931e-05	1	1.37156	1.20604	0.891133	15.8724	12.8423	11.7579	0.243356	0.213989	0.158114	2.81625	2.27862	2.08621	protein_coding	HGNC:21650	OTTHUMG00000008394.2_4
ENSG00000243970.3_4	PPIEL	0.467546	0.0785175	0.162465	0	8.81714	7.34757	6.74235	14.5286	7.10248	9.97392	1.62798	1.35664	1.24489	2.68253	1.31139	1.84157	transcribed_unprocessed_pseudogene	HGNC:33195	OTTHUMG00000008393.3_4
ENSG00000090621.14_5	PABPC4	0.443795	1.70968e-05	0.00051564	0	127.515	131.458	136.444	181.412	181.382	175.071	18.802	19.3834	20.1186	26.7491	26.7446	25.814	protein_coding	HGNC:8557	OTTHUMG00000009097.7_5
ENSG00000163909.8_3	HEYL	5.11527	8.52102e-09	6.13199e-06	1	0.313498	0.278317	0.201766	7.22533	10.6537	9.6293	0.0768944	0.0682652	0.0494888	1.77222	2.61313	2.36186	protein_coding	HGNC:4882	OTTHUMG00000000458.3_3
ENSG00000084072.16_3	PPIE	0.0263085	0.677713	0.774198	0	39.8535	36.9791	39.9833	38.4442	41.9955	38.5375	4.93786	4.58172	4.95394	4.76325	5.20326	4.77481	protein_coding	HGNC:9258	OTTHUMG00000009248.4_3
ENSG00000116985.12_4	BMP8B	1.94694	9.51801e-08	2.03343e-05	1	18.7903	13.9715	14.1741	64.4243	59.1323	57.2082	3.89356	2.89505	2.93702	13.3494	12.2529	11.8542	protein_coding	HGNC:1075	OTTHUMG00000009247.2_4
ENSG00000043514.16_4	TRIT1	0.0746574	0.298553	0.429339	0	15.4006	14.3983	14.7625	16.3398	14.8863	15.6907	2.35736	2.20393	2.25969	2.50111	2.27863	2.40176	protein_coding	HGNC:20286	OTTHUMG00000009245.5_4
ENSG00000116990.11_4	MYCL	0.285843	0.00929187	0.03476	0	9.11105	8.03409	8.74319	10.4388	11.1286	9.9942	1.79954	1.58682	1.72688	2.06177	2.19802	1.97397	protein_coding	HGNC:7555	OTTHUMG00000009243.7_4
ENSG00000168389.17_3	MFSD2A	-0.537872	0.00116637	0.00830615	0	80.9022	107.059	108.231	62.652	71.7062	69.7161	20.1902	26.7181	27.0104	15.6356	17.8952	17.3986	protein_coding	HGNC:25897	OTTHUMG00000009293.2_3
ENSG00000131236.17_4	CAP1	0.0637914	0.371139	0.504934	0	582.421	634.415	651.183	619.606	683.944	648.954	152.706	166.338	170.735	162.456	179.325	170.15	protein_coding	HGNC:20040	OTTHUMG00000004493.3_4
ENSG00000131238.17_5	PPT1	0.0968038	0.186161	0.303049	0	173.149	181.314	194.822	182.659	205.559	199.235	34.0309	35.6357	38.2905	35.8999	40.4008	39.1579	protein_coding	HGNC:9325	OTTHUMG00000004495.8_5
ENSG00000117000.9_3	RLF	-0.0456369	0.480229	0.60663	0	29.7236	28.4255	27.6924	28.1223	26.2007	28.8271	4.76951	4.56121	4.44358	4.51257	4.20422	4.62565	protein_coding	HGNC:10025	OTTHUMG00000005763.2_3
ENSG00000259943.1_6	AL050341.2	-0.226232	0.0972664	0.18934	0	6.26997	4.86127	5.64945	5.02462	4.89328	4.41934	4.06877	3.15462	3.66609	3.26063	3.17539	2.86784	lncRNA	NA	OTTHUMG00000175805.2_6
ENSG00000084073.9_3	ZMPSTE24	-0.135901	0.101557	0.195356	0	62.7389	58.1868	51.9884	50.8695	52.0092	54.4511	18.2433	16.9197	15.1173	14.7919	15.1233	15.8334	protein_coding	HGNC:12877	OTTHUMG00000005762.3_3
ENSG00000049089.15_6	COL9A2	-0.192864	0.0487956	0.115222	0	11.0312	11.0028	12.2068	10.7309	9.62139	9.60902	2.61713	2.61039	2.89605	2.54588	2.28265	2.27972	protein_coding	HGNC:2218	OTTHUMG00000005761.7_6
ENSG00000084070.12_5	SMAP2	0.0244205	0.66914	0.767675	0	45.8099	44.4565	48.5752	46.3317	48.4373	46.4639	12.7215	12.3456	13.4894	12.8663	13.4511	12.9031	protein_coding	HGNC:25082	OTTHUMG00000007301.7_5
ENSG00000187801.15_3	ZFP69B	0.538291	0.00261891	0.0144856	0	2.27286	1.92967	1.9504	3.0771	2.89055	2.95974	0.885761	0.752013	0.760095	1.19918	1.12648	1.15345	protein_coding	HGNC:28053	OTTHUMG00000007302.4_3
ENSG00000260920.2_6	AL031985.3	0.351925	0.0322315	0.0851431	0	1.44993	1.65135	1.51324	2.06438	1.98209	1.84477	0.59205	0.674295	0.617903	0.842948	0.809346	0.753275	lncRNA	NA	OTTHUMG00000175830.2_6
ENSG00000187815.10_3	ZFP69	0.0926705	0.464526	0.593612	0	4.68288	4.74995	4.43885	5.56993	4.95522	4.25716	1.47585	1.49699	1.39894	1.75542	1.56168	1.34168	protein_coding	HGNC:24708	OTTHUMG00000007303.2_3
ENSG00000164002.11_6	EXO5	0.0244667	0.775787	0.849811	0	7.64152	7.23625	7.38127	7.96539	7.30895	7.35881	2.47139	2.34031	2.38722	2.57613	2.36383	2.37995	protein_coding	HGNC:26115	OTTHUMG00000007305.3_6
ENSG00000117010.17_4	ZNF684	-0.194337	0.21661	0.339101	0	4.27142	3.63668	3.90081	4.10929	3.01443	3.18274	1.37743	1.17274	1.25792	1.32515	0.972082	1.02636	protein_coding	HGNC:28418	OTTHUMG00000007359.6_4
ENSG00000117016.10_3	RIMS3	0.335078	0.00528241	0.0235123	0	6.23078	5.97454	5.61582	7.12796	7.82512	7.52099	0.858352	0.823053	0.773635	0.981947	1.07799	1.03609	protein_coding	HGNC:21292	OTTHUMG00000007453.2_3
ENSG00000272145.1_6	NFYC-AS1	0.350982	0.136513	0.242783	0	1.03846	0.779288	0.638926	1.11009	0.991044	1.01361	0.615568	0.461937	0.378735	0.658027	0.587459	0.600836	lncRNA	HGNC:49451	OTTHUMG00000185712.1_6
ENSG00000066136.20_3	NFYC	-0.167942	0.00874373	0.0333088	0	48.6902	50.1156	49.5672	44.2673	44.9893	42.8149	8.12858	8.36655	8.27499	7.39021	7.51073	7.14773	protein_coding	HGNC:7806	OTTHUMG00000007729.5_3
ENSG00000179862.6_2	CITED4	-0.110453	0.551545	0.668968	0	2.7627	2.63474	3.2787	2.90182	3.09701	2.04749	2.09932	2.00208	2.49141	2.20503	2.35335	1.55585	protein_coding	HGNC:18696	OTTHUMG00000007728.1_2
ENSG00000171793.16_5	CTPS1	-0.0217873	0.713102	0.802093	0	77.2382	84.0703	86.4903	83.4906	79.3455	81.2713	6.9185	7.53049	7.74725	7.47855	7.10726	7.27976	protein_coding	HGNC:2519	OTTHUMG00000005712.13_5
ENSG00000010803.16_5	SCMH1	-0.386418	5.45137e-05	0.00107401	0	55.9399	58.5394	60.2271	44.9684	43.8743	44.8218	12.5792	13.1638	13.5433	10.1121	9.86605	10.0791	protein_coding	HGNC:19003	OTTHUMG00000005720.3_5
ENSG00000127124.16_5	HIVEP3	0.209007	0.103865	0.198539	0	111.312	85.0166	85.0443	120.357	103.254	101.523	7.61104	5.8131	5.815	8.22956	7.06013	6.94176	protein_coding	HGNC:13561	OTTHUMG00000192539.4_5
ENSG00000198815.9_6	FOXJ3	-0.0254185	0.740902	0.823284	0	61.6808	58.0013	52.2238	59.6333	53.1034	56.1135	8.94443	8.41086	7.57305	8.64752	7.70062	8.1371	protein_coding	HGNC:29178	OTTHUMG00000007026.5_6
ENSG00000186409.17_6	CCDC30	0.440851	0.0265635	0.073927	0	1.8614	1.28026	1.54687	2.12281	2.14726	2.08804	0.0738474	0.0507918	0.0613692	0.0842183	0.0851885	0.0828389	protein_coding	HGNC:26103	OTTHUMG00000007334.18_6
ENSG00000171960.11_5	PPIH	0.00857792	0.905689	0.940209	0	24.061	25.2712	26.7004	24.3246	27.3776	24.8132	16.6397	17.4766	18.465	16.822	18.9333	17.1599	protein_coding	HGNC:14651	OTTHUMG00000007520.7_5
ENSG00000065978.19_4	YBX1	-0.142212	0.0640684	0.140453	0	609.421	628.533	663.423	538.336	607.923	576.663	179.506	185.135	195.412	158.567	179.064	169.857	protein_coding	HGNC:8014	OTTHUMG00000007523.7_4
ENSG00000117385.15_3	P3H1	0.585001	1.28856e-06	9.84269e-05	1	81.921	78.0216	78.6215	121	116.221	120.62	12.1078	11.5314	11.6201	17.8835	17.1771	17.8273	protein_coding	HGNC:19316	OTTHUMG00000007525.7_3
ENSG00000164008.16_5	C1orf50	-0.125301	0.26349	0.392451	0	6.93615	8.70205	7.5326	7.16691	7.30895	6.77092	1.31217	1.64624	1.42501	1.35583	1.3827	1.28091	protein_coding	HGNC:28795	OTTHUMG00000191873.3_5
ENSG00000177868.12_3	SVBP	-0.0861093	0.220857	0.344487	0	25.7461	28.1657	26.3641	23.7988	25.602	26.2322	19.0289	20.8172	19.4856	17.5897	18.9224	19.3882	protein_coding	HGNC:29204	OTTHUMG00000007566.2_3
ENSG00000164010.15_7	ERMAP	0.177014	0.0124448	0.0427963	0	22.1996	21.282	21.5217	23.8962	24.9	24.6915	3.88105	3.72063	3.76254	4.17765	4.35314	4.3167	protein_coding	HGNC:15743	OTTHUMG00000007619.3_7
ENSG00000228192.8_6	AL512353.1	-0.103257	0.526686	0.647373	0	1.78302	2.41208	2.38756	2.00595	2.14726	1.98668	0.472199	0.638793	0.6323	0.531238	0.568661	0.526132	lncRNA	NA	OTTHUMG00000007621.2_6
ENSG00000164011.18_4	ZNF691	0.0545331	0.471146	0.599032	0	11.7758	12.2645	12.4086	13.3211	12.5945	11.9403	5.78378	6.02383	6.0946	6.54278	6.18591	5.8646	protein_coding	HGNC:28028	OTTHUMG00000007623.7_4
ENSG00000117394.22_5	SLC2A1	0.461159	0.001452	0.00967503	0	782.139	621	643.482	1019.92	904.844	892.646	165.567	131.456	136.216	215.902	191.542	188.96	protein_coding	HGNC:11005	OTTHUMG00000007657.11_5
ENSG00000227533.6_5	SLC2A1-AS1	0.1056	0.571544	0.685863	0	1.05806	1.09471	1.26104	1.18799	1.05298	1.43933	0.247499	0.256074	0.294979	0.277893	0.246312	0.336685	lncRNA	HGNC:44187	OTTHUMG00000007699.2_5
ENSG00000117395.12_4	EBNA1BP2	0.25855	0.00366276	0.0183447	0	61.7396	68.1877	70.08	77.5506	84.28	77.4804	17.3377	19.1485	19.6799	21.7778	23.6675	21.758	protein_coding	HGNC:15531	OTTHUMG00000007284.2_4
ENSG00000117399.14_3	CDC20	-0.167487	0.0179336	0.0550778	0	147.383	140.903	150.618	135.334	132.717	122.748	73.2522	70.0312	74.86	67.2633	65.9629	61.008	protein_coding	HGNC:1723	OTTHUMG00000007420.3_3
ENSG00000066322.15_4	ELOVL1	0.296568	0.00219463	0.012851	0	118.189	128.917	135.839	147.116	163.151	160.13	47.1624	51.4431	54.2055	58.7056	65.104	63.8987	protein_coding	HGNC:14418	OTTHUMG00000007422.3_4
ENSG00000159479.17_3	MED8	0.110832	0.0618779	0.137013	0	34.7591	35.0865	35.5108	36.8278	39.0843	37.8685	12.8547	12.9758	13.1327	13.6197	14.4543	14.0046	protein_coding	HGNC:19971	OTTHUMG00000007421.7_3
ENSG00000198198.16_7	SZT2	0.231416	0.0453767	0.109136	0	35.9348	41.1909	37.8816	51.9016	40.3644	42.7338	1.36354	1.56299	1.43741	1.9694	1.53162	1.62153	protein_coding	HGNC:29040	OTTHUMG00000007423.16_7
ENSG00000178922.16_5	HYI	0.0707161	0.432197	0.564038	0	15.283	19.1111	17.4359	17.9367	18.1898	18.3261	5.57775	6.97486	6.36348	6.54626	6.63861	6.68835	protein_coding	HGNC:26948	OTTHUMG00000007502.3_5
ENSG00000142949.17_4	PTPRF	0.196312	0.00638228	0.0269953	0	282.521	302.271	304.196	341.928	333.879	342.783	26.3742	28.218	28.3977	31.9201	31.1687	31.9999	protein_coding	HGNC:9670	OTTHUMG00000007501.6_4
ENSG00000066135.13_5	KDM4A	-0.0558937	0.314192	0.446147	0	54.6859	52.9545	55.2166	50.7721	51.4311	54.4714	10.549	10.215	10.6514	9.794	9.92111	10.5076	protein_coding	HGNC:22978	OTTHUMG00000007560.4_5
ENSG00000236200.6_6	KDM4A-AS1	-0.0547093	0.818911	0.881443	0	1.01887	0.872061	0.655739	0.681635	0.970397	0.790616	0.24161	0.206796	0.155499	0.16164	0.230116	0.187483	lncRNA	HGNC:40528	OTTHUMG00000007557.2_6
ENSG00000126091.20_6	ST3GAL3	-0.0546718	0.736459	0.820053	0	3.64442	3.67379	3.59816	4.30404	2.8286	3.36519	0.187133	0.188641	0.184758	0.221003	0.145243	0.172795	protein_coding	HGNC:10866	OTTHUMG00000007561.18_6
ENSG00000117407.17_6	ARTN	0.117023	0.722609	0.809789	0	0.979682	0.742179	0.689367	1.26589	0.516169	0.810888	0.368718	0.27933	0.259453	0.476437	0.194268	0.305189	protein_coding	HGNC:727	OTTHUMG00000007705.4_6
ENSG00000237950.2_6	AL357079.1	0.287502	0.309993	0.441776	0	1.05806	1.00194	1.29466	1.8891	0.908457	1.29742	0.380459	0.360281	0.465539	0.679289	0.326666	0.46653	lncRNA	NA	OTTHUMG00000007704.2_6
ENSG00000117408.11_3	IPO13	0.0910629	0.0799845	0.16453	0	92.5996	92.1415	95.1326	98.506	101.396	98.2188	18.257	18.1667	18.7564	19.4215	19.9914	19.3649	protein_coding	HGNC:16853	OTTHUMG00000008297.3_3
ENSG00000132768.14_3	DPH2	0.274906	0.00273691	0.0149508	0	37.4043	42.397	42.4885	50.7136	49.8	47.4775	12.766	14.47	14.5012	17.3084	16.9966	16.2039	protein_coding	HGNC:3004	OTTHUMG00000008295.3_3
ENSG00000117410.14_4	ATP6V0B	-0.00446684	0.933672	0.956907	0	126.947	129.714	132.476	124.817	135.463	127.674	39.1933	40.0477	40.9003	38.5357	41.8226	39.4178	protein_coding	HGNC:861	OTTHUMG00000008298.4_4
ENSG00000117411.16_2	B4GALT2	0.162331	0.0600711	0.13412	0	119.031	129.714	135.435	134.457	156.606	138.925	31.5566	34.3887	35.9055	35.6462	41.5179	36.8307	protein_coding	HGNC:925	OTTHUMG00000008296.1_2
ENSG00000159214.13_4	CCDC24	0.506083	0.00036235	0.00377335	0	15.91	14.7694	14.7457	24.1104	19.5525	20.8196	4.46535	4.14521	4.13857	6.76688	5.48764	5.84326	protein_coding	HGNC:28688	OTTHUMG00000008299.5_4
ENSG00000196517.11_6	SLC6A9	0.464742	0.0242829	0.0688267	0	28.6851	17.9793	18.2766	32.29	29.1532	28.0567	5.56021	3.48503	3.54267	6.25897	5.65094	5.4384	protein_coding	HGNC:11056	OTTHUMG00000008294.3_6
ENSG00000230615.7_7	AL139220.2	-0.0195214	0.931834	0.955812	0	3.31133	2.31931	2.00085	3.0771	2.14726	2.27049	0.313543	0.219611	0.189456	0.291364	0.20332	0.214988	lncRNA	NA	OTTHUMG00000008300.9_7
ENSG00000178028.14_4	DMAP1	0.241144	0.00652453	0.0274155	0	44.3404	44.5308	43.3124	56.9263	48.5612	50.7211	7.91935	7.95334	7.73574	10.1672	8.67318	9.05895	protein_coding	HGNC:18291	OTTHUMG00000007577.5_4
ENSG00000117419.15_4	ERI3	-0.0479155	0.487561	0.613061	0	89.2295	95.0917	99.0839	87.1909	98.6295	88.3665	32.0393	34.1442	35.5777	31.3073	35.4146	31.7295	protein_coding	HGNC:17276	OTTHUMG00000007637.6_4
ENSG00000187147.18_5	RNF220	-0.100488	0.0681836	0.146676	0	110.155	117.45	115.057	107.328	107.074	105.213	11.3715	12.1245	11.8775	11.0796	11.0534	10.8612	protein_coding	HGNC:25552	OTTHUMG00000007697.8_5
ENSG00000126106.14_3	TMEM53	-0.0489233	0.512762	0.634703	0	19.1626	17.4969	19.8235	18.7937	18.5201	17.2922	5.38124	4.91347	5.56684	5.27763	5.20082	4.85599	protein_coding	HGNC:26186	OTTHUMG00000007833.3_3
ENSG00000198520.12_7	ARMH1	0.70738	0.00597504	0.0257963	1	0.568216	0.53808	0.638926	0.817962	0.991044	1.05415	0.17271	0.16355	0.194202	0.248621	0.301229	0.320412	protein_coding	HGNC:34345	OTTHUMG00000007834.10_7
ENSG00000142945.13_5	KIF2C	-0.262286	0.00157065	0.0102167	0	91.0517	82.5674	84.4727	74.7267	69.9305	70.5067	24.973	22.646	23.1686	20.4955	19.1801	19.3381	protein_coding	HGNC:6393	OTTHUMG00000008416.7_5
ENSG00000225721.5_6	AL592166.1	0.714484	0.00743412	0.0298434	1	0.822933	0.70507	0.79025	1.03219	1.21816	1.56096	1.07573	0.92166	1.03301	1.34927	1.59236	2.04047	lncRNA	NA	OTTHUMG00000008489.1_6
ENSG00000142937.12_3	RPS8	0.165829	0.062948	0.138798	0	645.042	700.042	742.768	722.553	830.474	789.197	231.946	251.723	267.087	259.818	298.624	283.782	protein_coding	HGNC:10441	OTTHUMG00000008494.2_3
ENSG00000173846.13_3	PLK3	0.898714	3.20825e-07	4.29815e-05	1	29.8607	27.3679	27.2888	55.2319	50.9149	51.39	8.97527	8.22599	8.20224	16.6011	15.3035	15.4464	protein_coding	HGNC:2154	OTTHUMG00000008491.3_3
ENSG00000222009.8_2	BTBD19	0.547858	0.0164297	0.0519647	0	15.4202	15.2518	14.8466	29.6414	16.5587	20.2925	4.38074	4.33289	4.21779	8.42085	4.70417	5.76491	protein_coding	HGNC:27145	OTTHUMG00000008493.3_2
ENSG00000117425.14_3	PTCH2	-0.130007	0.266794	0.395968	0	7.17128	7.4589	6.99455	7.43956	5.76044	6.54792	1.34445	1.39837	1.31131	1.39474	1.07995	1.22758	protein_coding	HGNC:9586	OTTHUMG00000008490.5_3
ENSG00000070785.16_5	EIF2B3	-0.133456	0.125061	0.227358	0	27.8818	28.945	30.5844	24.7336	29.401	25.5835	8.17407	8.48578	8.96639	7.25113	8.61946	7.5003	protein_coding	HGNC:3259	OTTHUMG00000008585.4_5
ENSG00000126107.15_3	HECTD3	0.273532	0.00036447	0.00379254	0	70.929	70.5812	74.5693	86.3534	87.6661	87.1907	13.9844	13.9159	14.7022	17.0255	17.2843	17.1906	protein_coding	HGNC:26117	OTTHUMG00000008587.2_3
ENSG00000126088.14_4	UROD	0.041439	0.544422	0.662444	0	67.5197	70.507	76.3348	69.0399	77.0743	74.5409	16.7584	17.4999	18.9463	17.1357	19.1299	18.5011	protein_coding	HGNC:12591	OTTHUMG00000008949.7_4
ENSG00000132781.17_6	MUTYH	-0.0326078	0.732236	0.817228	0	19.868	20.5584	19.9412	22.5329	17.653	18.8126	5.08262	5.25924	5.10136	5.76437	4.51598	4.81264	protein_coding	HGNC:7527	OTTHUMG00000007682.6_6
ENSG00000132773.12_3	TOE1	-0.121538	0.103504	0.198042	0	15.4986	15.6043	16.4271	15.1907	14.5973	13.9067	6.57276	6.61761	6.96654	6.44221	6.19052	5.89768	protein_coding	HGNC:15954	OTTHUMG00000007678.3_3
ENSG00000070759.17_3	TESK2	0.00410683	0.978035	0.985923	0	1.5283	1.48436	1.32829	1.38275	1.44527	1.52042	0.460471	0.447231	0.400209	0.416615	0.435454	0.458094	protein_coding	HGNC:11732	OTTHUMG00000007680.3_3
ENSG00000280670.3_5	CCDC163	-0.19725	0.134646	0.240185	0	3.50726	3.45113	4.11939	3.36922	3.09701	3.20301	1.27213	1.25177	1.49416	1.22206	1.12333	1.16177	protein_coding	HGNC:27003	OTTHUMG00000007741.10_5
ENSG00000132763.15_3	MMACHC	-0.270353	0.0099469	0.0364036	0	12.0109	13.5262	11.9883	9.83502	10.8189	10.4605	2.37887	2.67899	2.37438	1.94791	2.14278	2.07179	protein_coding	HGNC:24525	OTTHUMG00000007742.6_3
ENSG00000117450.14_4	PRDX1	-0.0709409	0.225161	0.34917	0	277.583	263.158	282.338	258.242	269.234	256.119	184.563	174.972	187.725	171.704	179.012	170.292	protein_coding	HGNC:9352	OTTHUMG00000007738.7_4
ENSG00000117448.13_5	AKR1A1	0.163304	0.0477088	0.11327	0	88.3869	99.0253	101.74	104.524	115.663	103.672	28.3201	31.7287	32.5987	33.4905	37.0596	33.2176	protein_coding	HGNC:380	OTTHUMG00000007740.4_5
ENSG00000132780.17_6	NASP	-0.292579	0.00313237	0.0164284	0	287.674	281.564	282.22	256.548	217.059	221.535	34.6428	33.9071	33.986	30.8945	26.1391	26.6781	protein_coding	HGNC:7644	OTTHUMG00000007826.5_6
ENSG00000159588.15_4	CCDC17	0.452478	0.0684212	0.146979	0	0.783746	0.909169	0.672553	1.32432	0.88781	1.01361	0.235855	0.273599	0.202393	0.398531	0.267171	0.305029	protein_coding	HGNC:26574	OTTHUMG00000007822.8_4
ENSG00000159592.11_4	GPBP1L1	-0.0310643	0.552961	0.670388	0	104.846	97.8378	99.6892	96.0326	101.066	98.827	14.1054	13.1626	13.4117	12.9198	13.5969	13.2957	protein_coding	HGNC:28843	OTTHUMG00000040990.3_4
ENSG00000159596.7_3	TMEM69	0.104515	0.140621	0.247964	0	28.9986	26.6628	28.0118	28.3365	30.041	31.5841	19.7943	18.1999	19.1207	19.3424	20.5058	21.5591	protein_coding	HGNC:28035	OTTHUMG00000040993.2_3
ENSG00000197429.10_3	IPP	-0.0824082	0.406636	0.538597	0	8.99348	7.97843	8.12108	7.47851	7.61865	8.59541	2.42739	2.15342	2.19192	2.01849	2.05632	2.31995	protein_coding	HGNC:6108	OTTHUMG00000008004.3_3
ENSG00000086015.21_3	MAST2	0.110834	0.0706782	0.150153	0	135.098	140.55	142.127	157.906	147.418	145.818	17.1531	17.8454	18.0456	20.049	18.7173	18.5142	protein_coding	HGNC:19035	OTTHUMG00000008007.6_3
ENSG00000117461.15_4	PIK3R3	-0.188757	0.0305506	0.0818253	0	72.6141	72.3254	71.1561	56.1278	66.3793	67.101	9.81669	9.77766	9.61959	7.58791	8.97381	9.07138	protein_coding	HGNC:8981	OTTHUMG00000008096.4_4
ENSG00000085998.14_3	POMGNT1	0.0504752	0.346948	0.480799	0	140.467	150.774	145.843	149.22	154.417	149.021	22.6962	24.3616	23.5649	24.1105	24.9502	24.0784	protein_coding	HGNC:19139	OTTHUMG00000007604.3_3
ENSG00000171357.6_3	LURAP1	0.422874	0.0670615	0.144901	0	1.05806	1.07616	1.2106	1.90858	1.25945	1.31769	0.572232	0.582023	0.65473	1.03222	0.681153	0.712652	protein_coding	HGNC:32327	OTTHUMG00000007605.2_3
ENSG00000085999.13_5	RAD54L	-0.0638778	0.62053	0.727909	0	26.2555	26.8112	25.3889	30.7904	22.0094	22.2183	6.43832	6.5746	6.22582	7.55038	5.39712	5.44834	protein_coding	HGNC:9826	OTTHUMG00000007772.10_5
ENSG00000132128.16_3	LRRC41	0.0662494	0.238366	0.364888	0	137.861	145.875	148.651	152.959	153.137	146.629	16.0192	16.9504	17.273	17.7735	17.7942	17.038	protein_coding	HGNC:16917	OTTHUMG00000007810.7_3
ENSG00000173660.12_3	UQCRH	-0.0623524	0.397308	0.530507	0	89.6605	93.4775	94.7459	79.6929	94.2524	92.2182	66.861	69.7073	70.6532	59.4279	70.2852	68.7683	protein_coding	HGNC:12590	OTTHUMG00000007813.4_3
ENSG00000117481.10_3	NSUN4	0.174524	0.0215782	0.0632453	0	26.4122	28.4626	27.0198	29.2324	32.2089	30.9962	3.11906	3.36119	3.19082	3.4521	3.80361	3.66039	protein_coding	HGNC:31802	OTTHUMG00000007808.4_3
ENSG00000117480.16_3	FAAH	0.753886	0.00747655	0.0299591	1	0.822933	0.667961	0.689367	1.44117	0.929104	1.29742	0.302105	0.245213	0.253072	0.529064	0.341081	0.476293	protein_coding	HGNC:3553	OTTHUMG00000007811.3_3
ENSG00000079277.21_7	MKNK1	0.271149	0.00368944	0.0184445	0	21.4942	22.2097	22.4128	28.3365	24.5696	26.8809	2.66347	2.75213	2.7773	3.51134	3.04456	3.33097	protein_coding	HGNC:7110	OTTHUMG00000007983.8_7
ENSG00000142961.14_3	MOB3C	0.31879	0.000754724	0.00623154	0	13.7156	14.2127	14.4431	18.0341	17.7149	17.1097	2.31838	2.40242	2.44136	3.04836	2.99441	2.89211	protein_coding	HGNC:29800	OTTHUMG00000007989.2_3
ENSG00000123472.12_5	ATPAF1	-0.226719	0.0114237	0.0402984	0	51.0415	54.3646	55.0317	41.5213	48.685	46.9301	8.99092	9.57629	9.69379	7.31395	8.57584	8.26672	protein_coding	HGNC:18803	OTTHUMG00000007988.4_5
ENSG00000159658.11_3	EFCAB14	-0.0619162	0.209991	0.331868	0	96.5379	100.51	96.9149	93.5788	93.2407	94.7928	15.2388	15.8658	15.2983	14.7717	14.7183	14.9633	protein_coding	HGNC:29051	OTTHUMG00000007992.5_3
ENSG00000123473.15_3	STIL	-0.309765	0.00246005	0.0139107	0	26.8041	25.4753	25.0358	22.5719	19.3254	20.4547	3.67633	3.49407	3.43379	3.09585	2.65058	2.80547	protein_coding	HGNC:10879	OTTHUMG00000007851.4_3
ENSG00000162368.13_2	CMPK1	-0.363421	0.00797379	0.0312663	0	155.201	128.1	113.762	97.2401	105.711	105.638	40.3749	33.3247	29.5948	25.2966	27.5004	27.4814	protein_coding	HGNC:18170	OTTHUMG00000007849.4_2
ENSG00000237424.1_5	FOXD2-AS1	0.340752	0.239495	0.366001	0	0.568216	0.909169	0.975202	0.837437	1.36269	0.932521	0.226471	0.362363	0.388682	0.333773	0.543119	0.371671	lncRNA	HGNC:44256	OTTHUMG00000007949.2_5
ENSG00000132122.12_6	SPATA6	0.172403	0.121577	0.222832	0	26.9609	22.5622	21.0677	26.5059	24.5283	28.4622	4.54039	3.79964	3.54795	4.46377	4.13074	4.79323	protein_coding	HGNC:18309	OTTHUMG00000007794.5_6
ENSG00000162373.13_4	BEND5	-0.661762	6.2028e-05	0.0011602	-1	8.58202	9.72255	9.66795	5.80364	5.7398	6.14248	4.00654	4.539	4.51352	2.70945	2.67964	2.86764	protein_coding	HGNC:25668	OTTHUMG00000008153.4_4
ENSG00000185104.20_4	FAF1	-0.199763	0.00806894	0.0315309	0	62.1902	63.8645	66.7341	52.9923	58.7194	56.1743	8.23821	8.46	8.84012	7.01977	7.77843	7.44129	protein_coding	HGNC:3578	OTTHUMG00000007930.7_4
ENSG00000123080.12_4	CDKN2C	-0.95362	4.42846e-07	5.17059e-05	-1	70.7135	60.6546	64.2456	34.6465	33.9639	32.3747	23.4306	20.0976	21.2875	11.48	11.2538	10.7272	protein_coding	HGNC:1789	OTTHUMG00000008046.4_4
ENSG00000123091.5_3	RNF11	-0.471484	0.000219296	0.00269081	0	182.868	174.06	153.88	114.534	127.411	126.438	58.7621	55.9317	49.4474	36.804	40.9419	40.6291	protein_coding	HGNC:10056	OTTHUMG00000008190.3_3
ENSG00000085831.15_6	TTC39A	-0.00435831	0.982994	0.98907	0	2.17489	2.41208	2.7911	1.79173	2.93184	2.65566	0.232311	0.257646	0.29813	0.191383	0.313164	0.283664	protein_coding	HGNC:18657	OTTHUMG00000008193.5_6
ENSG00000085832.17_6	EPS15	-0.223331	0.0267151	0.0741977	0	100.692	120.957	116.957	88.3594	100.653	101.077	13.6476	16.3942	15.8521	11.9761	13.6423	13.6998	protein_coding	HGNC:3419	OTTHUMG00000008192.3_6
ENSG00000117859.19_6	OSBPL9	-0.359243	0.00818223	0.0318553	0	158.885	208.775	208.307	141.157	153.818	154.089	15.4663	20.3227	20.2771	13.7406	14.9731	14.9994	protein_coding	HGNC:16386	OTTHUMG00000008234.9_6
ENSG00000078618.21_3	NRDC	0.0584396	0.25748	0.385515	0	159.904	164.56	166.154	166.689	171.079	173.145	23.609	24.2964	24.5319	24.6108	25.259	25.564	protein_coding	HGNC:7995	OTTHUMG00000008278.4_3
ENSG00000169213.7_3	RAB3B	0.0377533	0.825871	0.886689	0	1.15603	1.24315	1.07609	1.05167	1.17686	1.33797	0.0904558	0.0972731	0.0842007	0.0822899	0.0920864	0.104692	protein_coding	HGNC:9778	OTTHUMG00000008627.2_3
ENSG00000117862.12_4	TXNDC12	0.0477977	0.572404	0.686473	0	14.9891	12.951	14.2413	14.8596	15.196	13.5418	3.89936	3.36915	3.70482	3.86567	3.95318	3.52285	protein_coding	HGNC:24626	OTTHUMG00000008629.6_4
ENSG00000198841.3_3	KTI12	-0.0800506	0.449285	0.580138	0	5.11394	5.28803	5.16185	4.59617	5.36816	4.76397	2.98363	3.0852	3.01158	2.68154	3.13195	2.77944	protein_coding	HGNC:25160	OTTHUMG00000008630.1_3
ENSG00000134717.18_4	BTF3L4	-0.28831	0.00825666	0.0320343	0	60.7599	51.5443	48.5752	42.5146	45.1132	44.0718	10.2152	8.66583	8.16664	7.14771	7.58459	7.40951	protein_coding	HGNC:30547	OTTHUMG00000008960.3_4
ENSG00000157077.14_3	ZFYVE9	-0.0186263	0.741944	0.824095	0	28.1169	30.0211	29.2729	28.2781	29.1326	28.8879	4.84023	5.16804	5.03923	4.86798	5.01507	4.97295	protein_coding	HGNC:6775	OTTHUMG00000008061.2_3
ENSG00000154222.14_3	CC2D1B	0.348267	0.000196021	0.00251182	0	58.7809	64.1614	65.3722	80.1992	80.6462	78.9197	7.84269	8.56056	8.7221	10.7004	10.76	10.5296	protein_coding	HGNC:29386	OTTHUMG00000008102.6_3
ENSG00000085840.13_3	ORC1	-0.101153	0.192285	0.310292	0	25.4521	25.03	25.3216	25.7853	22.9385	21.9345	8.15513	8.01986	8.11331	8.26186	7.34974	7.02804	protein_coding	HGNC:8487	OTTHUMG00000008104.5_3
ENSG00000134748.13_3	PRPF38A	-0.0976743	0.0775094	0.161062	0	65.1881	64.2913	64.9182	62.3793	60.6602	58.6272	11.6055	11.4458	11.5574	11.1055	10.7994	10.4375	protein_coding	HGNC:25930	OTTHUMG00000008199.3_3
ENSG00000134744.14_6	TUT4	-0.0538451	0.347835	0.481713	0	60.8383	59.9124	58.3272	59.8281	54.5694	58.1001	3.75568	3.69853	3.60067	3.69332	3.36869	3.58665	protein_coding	HGNC:28981	OTTHUMG00000008200.7_6
ENSG00000116157.6_3	GPX7	-0.106664	0.288677	0.418921	0	5.48622	5.30658	5.41405	5.08305	5.26492	4.70315	3.24245	3.13628	3.19979	3.00417	3.11166	2.77964	protein_coding	HGNC:4559	OTTHUMG00000008322.2_3
ENSG00000162377.6_3	COA7	0.24044	0.00271231	0.014852	0	26.3731	28.8522	28.18	32.3679	33.0348	33.1451	6.35802	6.95569	6.79363	7.80326	7.96403	7.99061	protein_coding	HGNC:25716	OTTHUMG00000008505.4_3
ENSG00000162378.13_3	ZYG11B	-0.135874	0.0727326	0.153271	0	48.4355	46.2378	42.0009	40.9371	40.2612	43.1595	5.90245	5.63463	5.11832	4.98867	4.90631	5.25951	protein_coding	HGNC:25820	OTTHUMG00000008938.2_3
ENSG00000203995.9_3	ZYG11A	0.128352	0.498984	0.623411	0	2.4688	2.37497	1.66457	2.64864	2.31244	2.12858	0.525948	0.505959	0.354616	0.564261	0.492637	0.453469	protein_coding	HGNC:32058	OTTHUMG00000008923.4_3
ENSG00000121310.17_4	ECHDC2	0.118747	0.3645	0.49848	0	4.34979	3.56246	3.68223	4.57669	3.90224	4.09498	0.375889	0.307852	0.318202	0.395497	0.337214	0.35387	protein_coding	HGNC:23408	OTTHUMG00000008927.10_4
ENSG00000116171.18_5	SCP2	-0.209233	0.0251452	0.0707345	0	139.879	121.532	116.974	102.791	114.424	110.058	16.9489	14.7258	14.1735	12.4549	13.8646	13.3355	protein_coding	HGNC:10606	OTTHUMG00000008936.6_5
ENSG00000174348.13_3	PODN	-0.0436579	0.848121	0.902511	0	10.8157	6.21575	6.15386	8.47175	7.51542	6.44656	2.20728	1.26852	1.25589	1.72893	1.53376	1.31562	protein_coding	HGNC:23174	OTTHUMG00000008934.2_3
ENSG00000157184.7_4	CPT2	-0.0244388	0.655058	0.756854	0	30.233	29.5944	30.6012	29.2908	30.4127	29.2122	2.99663	2.93333	3.03312	2.90324	3.01444	2.89545	protein_coding	HGNC:2330	OTTHUMG00000008942.5_4
ENSG00000162384.14_3	CZIB	0.0626825	0.281109	0.410993	0	40.5001	37.0718	39.6134	41.2487	40.6328	40.5039	8.99202	8.23087	8.79516	9.15823	9.02149	8.99286	protein_coding	HGNC:26059	OTTHUMG00000008940.4_3
ENSG00000162385.11_3	MAGOH	-0.0810088	0.220175	0.343721	0	28.3324	28.0173	28.903	25.9021	28.637	26.0701	20.7868	20.5556	21.2054	19.0038	21.0103	19.127	protein_coding	HGNC:6815	OTTHUMG00000008932.2_3
ENSG00000226754.2_7	AL606760.1	0.138871	0.5005	0.62474	0	0.979682	0.946278	1.19378	0.954289	1.11492	1.37851	0.504731	0.487521	0.615034	0.491648	0.574407	0.710206	lncRNA	NA	OTTHUMG00000008941.5_7
ENSG00000157193.17_6	LRP8	-0.199495	0.0146617	0.0481471	0	145.933	150.755	150.887	140.612	119.854	129.296	7.41683	7.66188	7.6686	7.14635	6.0914	6.57126	protein_coding	HGNC:6700	OTTHUMG00000008924.44_6
ENSG00000058804.12_3	NDC1	-0.0785542	0.401548	0.53403	0	49.8071	45.0688	40.4709	44.5595	38.8159	44.7408	10.5523	9.54848	8.57434	9.44056	8.22371	9.47897	protein_coding	HGNC:25525	OTTHUMG00000008073.2_3
ENSG00000058799.15_3	YIPF1	0.00933648	0.888891	0.928977	0	29.508	27.3307	27.5242	27.0512	30.0823	27.7729	14.4931	13.4237	13.5188	13.2864	14.7752	13.6409	protein_coding	HGNC:25231	OTTHUMG00000008074.9_3
ENSG00000081870.11_2	HSPB11	-0.253423	0.00698014	0.0285832	0	30.8012	27.3493	26.5322	24.0325	22.856	24.1239	9.5183	8.45158	8.19908	7.42661	7.06303	7.45486	protein_coding	HGNC:25019	OTTHUMG00000008408.4_2
ENSG00000116212.15_4	LRRC42	-0.0726635	0.266508	0.395695	0	49.9442	51.7299	55.4856	47.695	52.0918	49.6872	23.0796	23.9048	25.6403	22.0402	24.072	22.9608	protein_coding	HGNC:28792	OTTHUMG00000008436.3_4
ENSG00000116209.11_5	TMEM59	-0.259927	0.001682	0.0106479	0	180.222	166.916	169.231	136.405	147.975	146.852	19.6986	18.2442	18.4972	14.9093	16.1739	16.0511	protein_coding	HGNC:1239	OTTHUMG00000008437.6_5
ENSG00000116205.14_5	TCEANC2	-0.118268	0.111989	0.210333	0	13.1082	12.4315	12.5599	11.6073	11.9751	11.5146	1.07726	1.02166	1.03221	0.953918	0.984148	0.946303	protein_coding	HGNC:26494	OTTHUMG00000008434.6_5
ENSG00000215883.10_4	CYB5RL	-0.0732555	0.466863	0.595357	0	5.8585	6.49407	6.84323	6.32947	5.88432	6.04112	0.656341	0.727545	0.766662	0.709105	0.659234	0.6768	protein_coding	HGNC:32220	OTTHUMG00000008082.13_4
ENSG00000116221.15_2	MRPL37	0.0355856	0.601731	0.711365	0	86.937	87.2432	95.099	86.4313	98.836	90.7789	34.1063	34.2264	37.3084	33.9079	38.7744	35.6135	protein_coding	HGNC:14034	OTTHUMG00000008118.6_2
ENSG00000157216.15_5	SSBP3	-0.640781	4.41662e-06	0.000220345	-1	30.5661	31.1901	32.3666	21.2475	19.6764	19.441	5.84773	5.96711	6.1922	4.06496	3.76437	3.71935	protein_coding	HGNC:15674	OTTHUMG00000008264.5_5
ENSG00000243725.7_4	TTC4	0.138567	0.394363	0.527714	0	2.50799	3.37692	2.85835	3.50555	3.36542	2.75702	0.719033	0.968152	0.819481	1.00503	0.964857	0.79043	protein_coding	HGNC:12394	OTTHUMG00000009914.4_4
ENSG00000162396.6_3	PARS2	0.11178	0.344732	0.478359	0	5.87809	6.8466	6.6919	7.51746	7.3296	6.14248	2.49495	2.90603	2.84037	3.19077	3.11103	2.60716	protein_coding	HGNC:30563	OTTHUMG00000009915.2_3
ENSG00000116133.13_4	DHCR24	0.138849	0.208426	0.329877	0	1202.44	1450.74	1515.82	1381.89	1621.2	1587.15	193.505	233.463	243.936	222.383	260.895	255.415	protein_coding	HGNC:2859	OTTHUMG00000009989.17_4
ENSG00000169174.10_2	PCSK9	1.26722	2.88005e-05	0.000706982	1	11.2663	13.9901	14.2581	24.4415	36.2144	34.5844	2.26186	2.80869	2.8625	4.90694	7.27051	6.94326	protein_coding	HGNC:20001	OTTHUMG00000008136.1_2
ENSG00000162402.14_3	USP24	0.0556064	0.381083	0.514649	0	55.646	61.7122	57.5706	61.6782	57.5838	62.5397	4.62829	5.13285	4.78837	5.13002	4.78947	5.20168	protein_coding	HGNC:12623	OTTHUMG00000008135.6_3
ENSG00000162407.9_4	PLPP3	0.190327	0.121143	0.222482	0	49.2976	36.3297	37.8479	49.1751	45.1544	46.4842	9.35084	6.89106	7.17905	9.3276	8.56496	8.81718	protein_coding	HGNC:9229	OTTHUMG00000008160.3_4
ENSG00000162409.11_3	PRKAA2	-0.522224	0.000776327	0.00631134	0	10.5806	9.88954	8.55824	6.75792	6.40049	7.03445	1.13016	1.05635	0.914146	0.721846	0.683667	0.751384	protein_coding	HGNC:9377	OTTHUMG00000008282.3_3
ENSG00000173406.15_4	DAB1	-0.441616	6.52257e-05	0.00118911	0	88.7984	88.9873	85.6328	59.906	65.5947	68.4592	11.7645	11.7895	11.3451	7.93667	8.69035	9.06985	protein_coding	HGNC:2661	OTTHUMG00000008391.7_4
ENSG00000162600.12_4	OMA1	-0.233704	0.0234573	0.0669865	0	10.9333	11.0585	10.1051	8.41332	9.24974	9.6293	2.94063	2.97431	2.71789	2.26286	2.48783	2.58991	protein_coding	HGNC:29661	OTTHUMG00000010068.7_4
ENSG00000162601.11_4	MYSM1	0.0755323	0.67892	0.775187	0	34.6808	29.5944	24.8677	38.7753	23.847	31.1989	2.64436	2.25653	1.89612	2.95656	1.8183	2.37887	protein_coding	HGNC:29401	OTTHUMG00000009533.4_4
ENSG00000177606.6_2	JUN	0.0326956	0.586907	0.698718	0	255.207	268.353	278.773	284.846	270.369	265.525	72.0924	75.8061	78.7495	80.4648	76.3755	75.0071	protein_coding	HGNC:6204	OTTHUMG00000008376.1_2
ENSG00000172456.17_4	FGGY	0.122822	0.248831	0.375872	0	6.23078	5.71478	6.45651	6.15419	7.16442	6.73037	0.51181	0.469425	0.530352	0.505519	0.588502	0.552848	protein_coding	HGNC:25610	OTTHUMG00000008424.16_4
ENSG00000162604.12_6	TM2D1	-0.186495	0.0431376	0.1051	0	23.2773	20.0017	19.5881	18.2873	18.7472	18.1842	4.21995	3.62613	3.55114	3.31532	3.3987	3.29662	protein_coding	HGNC:24142	OTTHUMG00000008466.6_6
ENSG00000132849.20_5	PATJ	-0.294718	0.0127578	0.0435877	0	7.66112	7.29191	7.43171	6.66055	5.78109	5.79785	0.638959	0.608166	0.619826	0.555509	0.482159	0.483557	protein_coding	HGNC:28881	OTTHUMG00000008560.10_5
ENSG00000162607.13_4	USP1	-0.384266	0.00340224	0.0174358	0	89.347	72.6779	69.5588	62.6325	58.0587	56.6811	23.0931	18.7847	17.9785	16.1883	15.0061	14.6501	protein_coding	HGNC:12607	OTTHUMG00000008972.5_4
ENSG00000116641.17_5	DOCK7	-0.0773584	0.206037	0.326881	0	87.76	92.9394	88.3903	82.2052	82.5251	90.3127	3.52846	3.73671	3.55381	3.30513	3.31799	3.6311	protein_coding	HGNC:19190	OTTHUMG00000013131.9_5
ENSG00000125703.15_3	ATG4C	-0.268958	0.0275154	0.0757841	0	14.7344	13.5448	11.467	10.4388	11.1286	11.393	4.72863	4.34685	3.68005	3.35005	3.57144	3.65628	protein_coding	HGNC:16040	OTTHUMG00000009142.5_3
ENSG00000088035.18_5	ALG6	-0.0869457	0.405341	0.53735	0	11.4819	10.6874	9.28123	10.4582	9.2291	9.89283	2.09256	1.94776	1.6915	1.906	1.68199	1.80296	protein_coding	HGNC:23157	OTTHUMG00000009140.9_5
ENSG00000142856.16_2	ITGB3BP	-0.278877	0.0635401	0.139683	0	19.045	15.8826	13.9891	15.0154	11.6448	13.6026	3.48874	2.90944	2.56258	2.75059	2.13313	2.49178	protein_coding	HGNC:6157	OTTHUMG00000013364.12_2
ENSG00000203965.13_4	EFCAB7	-0.199403	0.0974131	0.189571	0	10.365	8.20108	8.57505	7.98487	8.15547	7.48044	1.81715	1.43778	1.50334	1.39987	1.42978	1.31144	protein_coding	HGNC:29379	OTTHUMG00000008983.3_4
ENSG00000079739.17_5	PGM1	-0.0839091	0.157371	0.26981	0	38.1096	37.9625	38.4196	34.2765	37.1848	36.5711	9.34747	9.31137	9.4235	8.40729	9.12063	8.97009	protein_coding	HGNC:8905	OTTHUMG00000008968.5_5
ENSG00000185483.12_4	ROR1	0.812337	0.000218722	0.0026903	1	2.09652	1.96677	2.11854	3.17447	3.96418	3.73009	0.311982	0.292675	0.315259	0.472392	0.589907	0.555072	protein_coding	HGNC:10256	OTTHUMG00000009022.2_4
ENSG00000158966.15_4	CACHD1	-0.786446	2.29431e-06	0.000144563	-1	54.1373	61.7308	58.9157	35.6593	31.7753	33.8951	7.70966	8.79105	8.39015	5.07822	4.52511	4.82699	protein_coding	HGNC:29314	OTTHUMG00000009030.6_4
ENSG00000162437.14_2	RAVER2	-0.457807	3.81633e-05	0.000852684	0	22.082	22.3953	21.2527	15.775	15.9393	16.1367	3.6379	3.6895	3.50127	2.59884	2.62591	2.65843	protein_coding	HGNC:25577	OTTHUMG00000009102.5_2
ENSG00000162434.12_3	JAK1	0.378068	0.000500253	0.00472699	0	91.3456	104.833	107.037	127.836	129.847	136.432	14.358	16.478	16.8244	20.0936	20.4098	21.4448	protein_coding	HGNC:6190	OTTHUMG00000009310.2_3
ENSG00000162433.15_4	AK4	1.14119	0.000662609	0.0057356	1	0.391873	0.445308	0.538043	0.973764	0.88781	1.19606	0.0517119	0.0587632	0.0710006	0.128499	0.117156	0.157833	protein_coding	HGNC:363	OTTHUMG00000009033.3_4
ENSG00000116675.16_4	DNAJC6	-0.067323	0.31357	0.445548	0	21.4159	20.6511	21.5217	19.0663	20.8532	20.779	3.07788	2.96797	3.09309	2.7402	2.99701	2.98635	protein_coding	HGNC:15469	OTTHUMG00000009066.4_4
ENSG00000213625.9_5	LEPROT	-0.188016	0.0169291	0.0529684	0	120.344	128.879	128.659	101.953	115.106	114.68	22.9796	24.6094	24.5674	19.4678	21.9793	21.898	protein_coding	HGNC:29477	OTTHUMG00000009065.7_5
ENSG00000116678.19_4	LEPR	-0.277799	0.00855326	0.0328231	0	15.7729	13.5262	13.7201	11.7631	11.5002	12.2039	1.38724	1.18964	1.20669	1.03457	1.01145	1.07334	protein_coding	HGNC:6554	OTTHUMG00000009115.1_4
ENSG00000184588.18_6	PDE4B	-0.286601	0.130444	0.234618	0	33.1133	22.5066	23.3544	25.9216	20.4403	18.3058	3.70809	2.52033	2.61528	2.90276	2.28895	2.04992	protein_coding	HGNC:8781	OTTHUMG00000009088.6_6
ENSG00000118473.22_5	SGIP1	-0.726402	0.0017153	0.0107633	-1	2.17489	2.80173	2.42119	1.32432	1.46592	1.68259	0.16328	0.21034	0.181771	0.0994234	0.110054	0.126321	protein_coding	HGNC:25412	OTTHUMG00000009161.9_5
ENSG00000152763.17_5	WDR78	0.429485	0.00170268	0.0107186	0	5.17272	5.28803	5.75033	6.79688	7.41218	7.64262	0.775172	0.792451	0.861731	1.01856	1.11077	1.14531	protein_coding	HGNC:26252	OTTHUMG00000009165.6_5
ENSG00000198160.14_3	MIER1	-0.239971	0.0304797	0.081774	0	32.4275	27.405	25.5234	25.0257	22.8766	24.3266	3.91968	3.31258	3.08514	3.02499	2.76521	2.94049	protein_coding	HGNC:29657	OTTHUMG00000009194.3_3
ENSG00000116704.8_3	SLC35D1	-0.290846	0.000345056	0.00366016	0	64.5807	63.1409	62.3289	53.0507	49.9032	52.3834	10.428	10.1955	10.0644	8.56623	8.058	8.45848	protein_coding	HGNC:20800	OTTHUMG00000009360.2_3
ENSG00000142864.14_4	SERBP1	-0.13851	0.0341715	0.0889447	0	395.028	382.389	367.13	341.46	355.475	342.823	51.4627	49.8162	47.8283	44.4841	46.3099	44.6617	protein_coding	HGNC:17860	OTTHUMG00000009372.3_4
ENSG00000116717.13_4	GADD45A	0.433473	5.91164e-05	0.00112264	0	32.9957	33.2496	35.3427	43.3909	46.6617	47.1734	17.1406	17.2725	18.3598	22.5407	24.2398	24.5057	protein_coding	HGNC:4095	OTTHUMG00000009374.5_4
ENSG00000172380.6_3	GNG12	-0.0453621	0.459866	0.589845	0	267.12	259.559	243.33	239.098	249.784	257.275	56.6533	55.0495	51.6076	50.7101	52.9765	54.5651	protein_coding	HGNC:19663	OTTHUMG00000009545.3_3
ENSG00000162595.6_4	DIRAS3	1.92255	3.62256e-06	0.000192776	1	0.940495	0.593743	0.722995	2.88234	2.89055	2.77729	0.461253	0.291193	0.354583	1.41361	1.41763	1.36209	protein_coding	HGNC:687	OTTHUMG00000009544.3_4
ENSG00000116729.14_7	WLS	-0.450421	0.00519028	0.0232401	0	143.935	191.761	196.066	116.306	136.145	136.777	32.2796	43.0053	43.9709	26.0835	30.5326	30.6743	protein_coding	HGNC:30238	OTTHUMG00000009153.5_7
ENSG00000116745.7_3	RPE65	-0.025501	0.893106	0.932361	0	14.3034	23.323	20.6474	15.3465	20.8532	21.1236	5.49073	8.95316	7.92606	5.89118	8.00507	8.10888	protein_coding	HGNC:10294	OTTHUMG00000009208.2_3
ENSG00000024526.17_4	DEPDC1	-0.439412	0.0193372	0.0582758	0	40.4021	30.485	26.0446	26.5059	21.6997	23.1914	6.84317	5.16345	4.41135	4.48948	3.67543	3.92808	protein_coding	HGNC:22949	OTTHUMG00000009212.5_4
ENSG00000066557.6_3	LRRC40	-0.32232	0.00124717	0.00868258	0	41.8128	37.6841	35.7462	30.4204	30.9288	30.7935	14.7073	13.2551	12.5734	10.7001	10.8789	10.8313	protein_coding	HGNC:26004	OTTHUMG00000009348.2_3
ENSG00000116754.13_2	SRSF11	-0.1329	0.278876	0.408427	0	166.801	148.436	129.803	151.05	115.952	138.783	19.6861	17.5187	15.3196	17.8273	13.6849	16.3795	protein_coding	HGNC:10782	OTTHUMG00000009342.4_2
ENSG00000118454.13_3	ANKRD13C	0.0355878	0.524102	0.644892	0	39.7359	38.2408	36.9568	40.1386	39.2908	38.355	6.4256	6.18383	5.9762	6.49071	6.35362	6.2023	protein_coding	HGNC:25374	OTTHUMG00000009343.3_3
ENSG00000197568.14_4	HHLA3	0.349707	0.0127641	0.0435983	0	6.38753	6.93938	7.04499	8.08224	9.97238	7.92643	5.22711	5.6787	5.76513	6.61395	8.1607	6.48644	protein_coding	HGNC:4906	OTTHUMG00000009346.5_4
ENSG00000116761.11_2	CTH	-0.493546	0.0174344	0.0540792	0	1.48912	1.2617	1.66457	1.03219	1.01169	1.0947	0.616867	0.522661	0.689548	0.427585	0.419093	0.453479	protein_coding	HGNC:2501	OTTHUMG00000009352.1_2
ENSG00000132485.14_5	ZRANB2	-0.221304	0.0561486	0.127677	0	79.0016	68.4846	60.9669	64.4632	54.5487	59.7219	15.8479	13.7381	12.2301	12.9314	10.9426	11.9803	protein_coding	HGNC:13058	OTTHUMG00000009660.2_5
ENSG00000162620.16_6	LRRIQ3	-0.327577	0.226208	0.350395	0	1.17562	0.723625	0.891133	0.681635	0.929104	0.608166	0.134218	0.082615	0.101739	0.0778211	0.106074	0.0694333	protein_coding	HGNC:28318	OTTHUMG00000009508.6_6
ENSG00000254685.6_5	FPGT	-0.296062	0.0405953	0.100534	0	13.6568	12.246	9.8529	9.19234	9.51815	10.3794	3.26717	2.92965	2.35715	2.19912	2.27707	2.4831	protein_coding	HGNC:3825	OTTHUMG00000009571.7_5
ENSG00000116791.14_4	CRYZ	-0.0745105	0.38818	0.52163	0	45.9275	38.2593	37.4948	37.6652	39.5592	38.2942	11.243	9.36581	9.17866	9.22037	9.68401	9.37434	protein_coding	HGNC:2419	OTTHUMG00000009620.6_4
ENSG00000162623.16_3	TYW3	0.0986345	0.144275	0.253157	0	17.3208	16.699	16.3767	17.9562	17.4672	18.5288	3.75234	3.61764	3.54781	3.88999	3.78404	4.01404	protein_coding	HGNC:24757	OTTHUMG00000009641.6_3
ENSG00000137968.16_2	SLC44A5	-0.127037	0.330506	0.462919	0	12.8534	14.7694	13.9891	10.3803	13.1726	14.5757	2.04055	2.34472	2.22085	1.64793	2.09123	2.31397	protein_coding	HGNC:28524	OTTHUMG00000009721.3_2
ENSG00000117054.13_6	ACADM	-0.357102	0.000219429	0.00269081	0	47.0443	43.7886	46.5743	34.0233	36.7512	36.5102	9.83574	9.15504	9.73747	7.11339	7.68372	7.63333	protein_coding	HGNC:89	OTTHUMG00000009784.3_6
ENSG00000137955.16_4	RABGGTB	0.139008	0.0405401	0.100454	0	48.0828	51.4887	50.5592	57.3352	52.1743	55.8094	8.1221	8.69741	8.5404	9.68501	8.81323	9.42726	protein_coding	HGNC:9796	OTTHUMG00000009786.3_4
ENSG00000184005.11_4	ST6GALNAC3	-1.06348	6.60547e-05	0.00119783	-1	8.26852	6.47551	6.15386	3.7003	2.97313	3.30437	1.14649	0.89788	0.853281	0.513076	0.412248	0.458177	protein_coding	HGNC:19343	OTTHUMG00000009615.2_4
ENSG00000117069.15_3	ST6GALNAC5	-0.546262	0.00262364	0.0145009	0	3.52686	3.04293	3.34595	2.04491	2.29179	2.45294	0.582086	0.502217	0.552228	0.337499	0.378245	0.404842	protein_coding	HGNC:19342	OTTHUMG00000009687.5_3
ENSG00000142892.15_5	PIGK	-0.212389	0.0177166	0.054632	0	50.7867	45.1802	42.9257	38.4637	39.8482	41.5377	9.21051	8.19372	7.78486	6.97564	7.22674	7.53314	protein_coding	HGNC:8965	OTTHUMG00000009686.3_5
ENSG00000226084.5_5	AC113935.1	0.136255	0.126073	0.22886	0	10.6002	9.7411	11.2653	11.9968	11.397	11.3524	19.0994	17.5515	20.2978	21.6158	20.5351	20.4548	processed_pseudogene	NA	OTTHUMG00000009683.1_5
ENSG00000154027.19_4	AK5	0.327348	0.00232816	0.0133864	0	19.1234	17.1814	17.8899	20.7607	23.6818	23.5563	2.75236	2.47286	2.57483	2.988	3.40844	3.39037	protein_coding	HGNC:365	OTTHUMG00000009796.8_4
ENSG00000036549.13_5	AC118549.1	-0.0420999	0.4007	0.533341	0	47.4362	47.1469	46.1708	45.6695	45.0512	45.9774	5.26601	5.2339	5.12553	5.06989	5.00124	5.10406	protein_coding	NA	OTTHUMG00000009652.7_5
ENSG00000077254.14_4	USP33	-0.223964	0.0102781	0.0372852	0	103.866	91.2138	88.1213	80.5498	79.1803	82.7106	15.0139	13.185	12.738	11.6435	11.4455	11.9559	protein_coding	HGNC:20059	OTTHUMG00000009651.5_4
ENSG00000180488.15_6	MIGA1	0.286853	0.0102937	0.0373133	0	15.5182	14.3241	12.8121	16.7098	16.7652	18.5288	1.5322	1.4143	1.26502	1.64986	1.65533	1.82946	protein_coding	HGNC:24741	OTTHUMG00000009766.6_6
ENSG00000162614.18_4	NEXN	-0.347214	0.000283155	0.00319965	0	54.9602	58.762	59.0838	42.8651	46.3313	46.6666	12.3896	13.2466	13.3192	9.66301	10.4444	10.52	protein_coding	HGNC:29557	OTTHUMG00000040533.4_4
ENSG00000162613.16_3	FUBP1	-0.29664	0.000651702	0.00566839	0	149.127	164.56	163.952	132.51	127.845	128.526	26.3197	29.0434	28.936	23.3868	22.5635	22.6837	protein_coding	HGNC:4004	OTTHUMG00000040799.5_3
ENSG00000162616.9_4	DNAJB4	0.13912	0.210219	0.332099	0	21.024	19.6492	18.1085	18.521	22.2572	23.9415	5.67909	5.30772	4.89154	5.00297	6.01221	6.46717	protein_coding	HGNC:14886	OTTHUMG00000040905.6_4
ENSG00000137965.11_3	IFI44	0.311754	0.362263	0.496115	0	0.999276	0.426753	0.823878	1.11009	0.660696	1.01361	0.490322	0.209398	0.404258	0.544696	0.324188	0.497355	protein_coding	HGNC:16938	OTTHUMG00000009723.3_3
ENSG00000117114.19_7	ADGRL2	-0.382226	7.31769e-05	0.00127731	0	124.753	118.841	117.781	88.5931	92.3529	96.3132	16.0888	15.3265	15.1897	11.4255	11.9104	12.4211	protein_coding	HGNC:18582	OTTHUMG00000009844.3_7
ENSG00000137941.17_4	TTLL7	0.0312476	0.730737	0.816022	0	32.9565	33.7877	30.1472	36.7693	29.4423	32.7599	3.12473	3.20354	2.85837	3.48624	2.79153	3.10609	protein_coding	HGNC:26242	OTTHUMG00000009932.7_4
ENSG00000271576.1_6	AL359504.2	0.160173	0.337951	0.471125	0	1.60668	1.41014	1.49643	1.94753	1.54851	1.54069	1.00355	0.880787	0.934685	1.21645	0.967212	0.962328	lncRNA	NA	OTTHUMG00000185155.1_6
ENSG00000142875.19_5	PRKACB	-0.372722	0.000704106	0.00596292	0	88.9944	80.378	74.2667	64.5022	60.4124	63.2087	13.2235	11.9432	11.0352	9.58427	8.97658	9.39208	protein_coding	HGNC:9381	OTTHUMG00000009975.4_5
ENSG00000203943.8_5	SAMD13	-0.380874	0.156231	0.268766	0	1.35196	1.20604	1.02564	0.623209	0.949751	1.17579	0.391306	0.349071	0.296858	0.180379	0.274892	0.340315	protein_coding	HGNC:24582	OTTHUMG00000009859.4_5
ENSG00000117133.11_3	RPF1	-0.130866	0.0443061	0.107224	0	40.9899	38.4078	40.4541	35.2113	37.7423	36.5102	17.8995	16.772	17.6655	15.3761	16.4813	15.9433	protein_coding	HGNC:30350	OTTHUMG00000009857.2_3
ENSG00000174021.11_4	GNG5	-0.116212	0.0882983	0.176301	0	45.085	47.5551	50.9963	45.2411	44.1634	43.1392	39.969	42.1588	45.2095	40.1074	39.152	38.244	protein_coding	HGNC:4408	OTTHUMG00000009858.5_4
ENSG00000117151.13_4	CTBS	0.0234892	0.833179	0.892025	0	3.31133	3.04293	3.11056	3.2329	3.26219	3.12192	0.477549	0.438843	0.448595	0.466238	0.470462	0.450234	protein_coding	HGNC:2496	OTTHUMG00000009922.6_4
ENSG00000117155.16_3	SSX2IP	-0.12353	0.156166	0.268687	0	52.3346	45.1802	42.6062	43.4104	41.3761	43.788	6.05795	5.22979	4.93185	5.02494	4.78945	5.06864	protein_coding	HGNC:16509	OTTHUMG00000009926.6_3
ENSG00000097096.9_3	SYDE2	-0.373597	0.0343211	0.0891983	0	4.11467	5.77044	5.59901	3.68083	4.29452	3.99362	0.642415	0.900928	0.874162	0.574681	0.670496	0.623517	protein_coding	HGNC:25841	OTTHUMG00000009956.5_3
ENSG00000162642.14_3	C1orf52	-0.0413539	0.532933	0.652763	0	19.143	19.4636	17.6209	18.2289	18.1898	18.2044	5.59737	5.69113	5.15231	5.33008	5.31865	5.32294	protein_coding	HGNC:24871	OTTHUMG00000009966.5_3
ENSG00000142867.14_5	BCL10	-0.0189305	0.769509	0.84544	0	24.4725	22.6736	21.9084	22.9224	22.5463	22.6643	5.63103	5.21711	5.04105	5.27437	5.18782	5.21498	protein_coding	HGNC:989	OTTHUMG00000009965.5_5
ENSG00000153904.20_5	DDAH1	-0.338926	0.0111456	0.0395128	0	83.998	107.189	100.227	67.5598	80.7288	82.1632	18.3122	23.368	21.8503	14.7285	17.5995	17.9122	protein_coding	HGNC:2715	OTTHUMG00000191181.3_5
ENSG00000282057.1_8	AC092807.3	-0.0213794	0.902396	0.938501	0	1.27359	1.55858	1.59731	1.24642	1.56915	1.56096	0.353088	0.432098	0.442837	0.345555	0.43503	0.432758	lncRNA	NA	OTTHUMG00000010578.6_8
ENSG00000142871.17_4	CCN1	-0.255576	0.162476	0.276036	0	413.406	670.577	666.113	462.635	483.051	520.367	169.221	274.489	272.662	189.372	197.729	213.003	protein_coding	HGNC:2654	OTTHUMG00000010577.2_4
ENSG00000117174.11_4	ZNHIT6	-0.0609576	0.303375	0.434441	0	30.6641	33.0455	31.4587	29.7388	30.8669	30.6313	4.94342	5.32735	5.07153	4.79426	4.97612	4.93814	protein_coding	HGNC:26089	OTTHUMG00000010576.2_4
ENSG00000171502.15_4	COL24A1	0.884412	0.0148349	0.0484277	1	0.960089	0.500971	0.504415	1.09062	1.03234	1.47987	0.100344	0.052359	0.0527189	0.113986	0.107895	0.154669	protein_coding	HGNC:20821	OTTHUMG00000010629.7_4
ENSG00000122417.15_8	ODF2L	-0.0108213	0.912409	0.944388	0	14.0486	12.9325	12.375	14.3338	11.5415	13.1567	1.2891	1.18668	1.13553	1.31527	1.05905	1.20725	protein_coding	HGNC:29225	OTTHUMG00000010080.6_8
ENSG00000097033.14_4	SH3GLB1	0.0242458	0.658354	0.759372	0	154.359	144.001	140.816	149.22	147.624	149.751	22.4326	20.9274	20.4644	21.6858	21.4539	21.7629	protein_coding	HGNC:10833	OTTHUMG00000010257.2_4
ENSG00000183291.17_8	SELENOF	-0.212461	0.0181412	0.0555531	0	156.671	141.83	129.248	121.312	121.362	126.458	71.1817	64.4391	58.7224	55.1166	55.1393	57.4548	protein_coding	HGNC:17705	OTTHUMG00000008520.10_8
ENSG00000153936.17_4	HS2ST1	-0.407224	0.00406619	0.0196525	0	114.427	93.1991	85.3302	76.1678	68.6917	75.9802	15.409	12.5504	11.4907	10.2569	9.25017	10.2316	protein_coding	HGNC:5193	OTTHUMG00000010255.5_4
ENSG00000143013.13_3	LMO4	-0.248634	0.00293908	0.0156641	0	75.1416	68.0022	66.5155	58.9517	60.0201	57.4717	13.8612	12.5442	12.27	10.8747	11.0718	10.6017	protein_coding	HGNC:6644	OTTHUMG00000010248.3_3
ENSG00000065243.20_5	PKN2	-0.313284	0.00183636	0.0113051	0	71.4972	67.5012	62.228	57.7053	51.4723	52.728	10.3664	9.78704	9.02247	8.36672	7.46301	7.64506	protein_coding	HGNC:9406	OTTHUMG00000010074.5_5
ENSG00000137947.12_4	GTF2B	-0.181543	0.0381708	0.0961512	0	29.1162	25.4011	27.9446	22.7277	25.5607	24.428	11.5357	10.0638	11.0715	9.00462	10.1271	9.67829	protein_coding	HGNC:4648	OTTHUMG00000010611.4_4
ENSG00000137944.18_6	KYAT3	-0.378634	0.000905326	0.00704526	0	23.3164	21.5974	20.95	15.6581	16.9716	18.022	10.6177	9.83489	9.54009	7.1303	7.72843	8.20673	protein_coding	HGNC:33238	OTTHUMG00000010617.9_6
ENSG00000213516.10_5	RBMXL1	-0.772837	7.62702e-06	0.000293758	-1	21.122	18.8514	18.8483	10.6725	11.6448	12.1025	4.15214	3.70579	3.70519	2.09799	2.28912	2.3791	protein_coding	HGNC:25073	OTTHUMG00000010661.6_5
ENSG00000117226.12_4	GBP3	-0.0897594	0.393137	0.526945	0	11.815	10.3534	10.0379	9.11443	10.9634	10.1766	2.75793	2.41676	2.3431	2.12755	2.55916	2.3755	protein_coding	HGNC:4184	OTTHUMG00000010616.9_4
ENSG00000117228.10_3	GBP1	-1.05787	0.000204797	0.00257134	-1	39.8927	58.595	61.6227	21.2865	27.8938	27.7932	8.20499	12.0516	12.6743	4.37813	5.7371	5.71641	protein_coding	HGNC:4182	OTTHUMG00000010614.4_3
ENSG00000234518.2_5	PTGES3P1	-0.30155	0.0654366	0.14247	0	1.46952	1.54002	1.64776	1.28537	1.21816	1.27715	3.04249	3.18845	3.4115	2.66122	2.52207	2.6442	processed_pseudogene	HGNC:43824	OTTHUMG00000192270.1_5
ENSG00000162645.13_4	GBP2	-1.21037	3.31951e-07	4.32264e-05	-1	29.6648	33.9733	35.1409	13.3016	15.0928	14.3122	4.10699	4.70348	4.86514	1.84156	2.08954	1.98147	protein_coding	HGNC:4183	OTTHUMG00000010662.5_4
ENSG00000197147.13_3	LRRC8B	0.00650551	0.968971	0.979864	0	3.42889	3.02438	2.65658	2.47336	3.42736	3.24355	0.417495	0.368243	0.323461	0.301152	0.417309	0.394929	protein_coding	HGNC:30692	OTTHUMG00000010129.5_3
ENSG00000171488.15_4	LRRC8C	-0.215899	0.252134	0.379505	0	2.37083	2.00388	1.76545	1.77225	2.02338	1.47987	0.20222	0.170922	0.150584	0.151164	0.172585	0.126226	protein_coding	HGNC:25075	OTTHUMG00000010305.6_4
ENSG00000171492.14_3	LRRC8D	-0.125957	0.194087	0.312757	0	42.6554	44.605	45.969	35.0166	42.5323	44.5786	8.7913	9.19311	9.47424	7.21693	8.76593	9.18767	protein_coding	HGNC:16992	OTTHUMG00000010583.5_3
ENSG00000228175.3_4	GEMIN8P4	-0.666549	0.0148085	0.0484048	-1	0.783746	1.05761	1.24422	0.681635	0.619403	0.64871	1.0751	1.45076	1.70675	0.935028	0.849661	0.889863	processed_pseudogene	HGNC:37979	OTTHUMG00000010673.1_4
ENSG00000162664.17_3	ZNF326	-0.232334	0.00333024	0.0170989	0	65.9326	60.2649	61.959	53.8102	51.1214	55.2215	6.00042	5.48461	5.63878	4.89718	4.65247	5.02562	protein_coding	HGNC:14104	OTTHUMG00000010675.5_3
ENSG00000143032.8_3	BARHL2	0.0372495	0.823093	0.8849	0	14.4601	13.7303	13.3166	11.1593	18.355	13.0958	7.07442	6.71738	6.51495	5.45956	8.97992	6.40697	protein_coding	HGNC:954	OTTHUMG00000010020.3_3
ENSG00000122482.21_3	ZNF644	-0.248099	0.00137806	0.00938238	0	75.0045	69.4123	68.7181	59.4191	59.8962	60.1274	9.86382	9.12839	9.0371	7.81419	7.87694	7.90733	protein_coding	HGNC:29222	OTTHUMG00000010078.5_3
ENSG00000097046.13_3	CDC7	-0.352824	0.00580146	0.0252381	0	34.0929	29.0563	27.6083	25.9995	22.1127	22.9076	9.47289	8.07344	7.67111	7.22409	6.14412	6.36499	protein_coding	HGNC:1745	OTTHUMG00000047810.4_3
ENSG00000172031.7_3	EPHX4	-0.0865778	0.477893	0.604987	0	16.8701	13.3778	12.2068	12.9121	13.7714	13.258	7.49784	5.94568	5.42526	5.73872	6.12061	5.89245	protein_coding	HGNC:23758	OTTHUMG00000010114.2_3
ENSG00000189195.13_6	BTBD8	-0.0852942	0.548905	0.666475	0	2.95864	3.15426	2.65658	2.94077	2.39502	2.9192	0.429598	0.458002	0.385739	0.427003	0.34776	0.423871	protein_coding	HGNC:21019	OTTHUMG00000191888.4_6
ENSG00000174842.17_3	GLMN	-0.182679	0.200538	0.320472	0	18.2221	15.1776	12.1732	13.3211	13.2965	13.481	6.26189	5.21566	4.18323	4.5777	4.56925	4.63265	protein_coding	HGNC:14373	OTTHUMG00000010283.9_3
ENSG00000122484.9_3	RPAP2	0.0348391	0.685994	0.780267	0	28.8223	27.6462	27.0366	31.2773	25.1684	29.0703	1.69065	1.62167	1.58591	1.83466	1.47633	1.70521	protein_coding	HGNC:25791	OTTHUMG00000010288.3_3
ENSG00000067208.14_3	EVI5	0.112641	0.109992	0.207329	0	39.7751	36.441	35.0232	38.8337	40.2405	41.1728	4.80608	4.40321	4.2319	4.69233	4.86231	4.97497	protein_coding	HGNC:3501	OTTHUMG00000010895.4_3
ENSG00000122406.14_4	RPL5	0.105718	0.179025	0.295307	0	637.891	665.271	700.918	661.517	764.178	730.793	173.011	180.437	190.105	179.419	207.263	198.208	protein_coding	HGNC:10360	OTTHUMG00000010899.10_4
ENSG00000154511.12_3	DIPK1A	-0.611787	1.68018e-05	0.000511257	-1	210.495	200.797	189.929	120.124	134.699	138.601	68.0992	64.9617	61.4458	38.8624	43.5779	44.8402	protein_coding	HGNC:32213	OTTHUMG00000010894.3_3
ENSG00000143033.18_3	MTF2	-0.250943	0.0144286	0.0476643	0	32.7606	29.6501	27.188	26.428	25.2716	23.5563	5.54606	5.01948	4.60267	4.47401	4.27825	3.98786	protein_coding	HGNC:29535	OTTHUMG00000010161.8_3
ENSG00000117500.13_3	TMED5	-0.342689	0.00653152	0.0274322	0	103.513	92.9765	77.5622	71.5133	73.4611	71.0743	11.238	10.0941	8.42061	7.7639	7.97537	7.71625	protein_coding	HGNC:24251	OTTHUMG00000010162.5_3
ENSG00000122483.17_5	CCDC18	-0.169948	0.197597	0.317176	0	13.5588	12.2274	11.5511	12.9705	9.45621	10.724	2.40703	2.17067	2.05061	2.3026	1.67872	1.90378	protein_coding	HGNC:30370	OTTHUMG00000010598.6_5
ENSG00000223745.8_7	CCDC18-AS1	0.734144	0.00727016	0.0293984	1	7.81787	6.4384	5.59901	14.2559	7.96965	10.724	1.24409	1.02457	0.890994	2.2686	1.26824	1.70656	lncRNA	HGNC:52262	OTTHUMG00000010705.14_7
ENSG00000117505.13_3	DR1	-0.141992	0.122356	0.22386	0	70.9878	59.1517	57.4529	55.8162	55.5191	58.6272	6.49774	5.41434	5.25884	5.10903	5.08184	5.36633	protein_coding	HGNC:3017	OTTHUMG00000010862.3_3
ENSG00000137942.16_2	FNBP1L	-0.266797	0.00869378	0.0332039	0	261.32	224.398	218.58	206.341	188.278	190.721	45.0708	38.7026	37.6992	35.5882	32.4729	32.8943	protein_coding	HGNC:20851	OTTHUMG00000010863.4_2
ENSG00000137936.18_6	BCAR3	0.316594	0.00165676	0.0105648	0	126.555	107.004	113.157	148.363	144.899	138.5	18.291	15.4652	16.3545	21.4428	20.9422	20.0173	protein_coding	HGNC:973	OTTHUMG00000010301.5_6
ENSG00000260464.1_6	AL049796.1	0.0925333	0.686835	0.781029	0	1.19521	0.872061	0.79025	1.20747	0.929104	0.891977	0.676791	0.493806	0.44748	0.68373	0.526106	0.505083	lncRNA	NA	OTTHUMG00000175883.1_6
ENSG00000067334.14_4	DNTTIP2	0.0452361	0.402054	0.534443	0	62.9152	63.5305	64.6996	62.8468	68.1136	66.2901	8.36861	8.45046	8.60596	8.3595	9.06007	8.81752	protein_coding	HGNC:24013	OTTHUMG00000010268.7_4
ENSG00000023909.10_3	GCLM	0.290019	0.0270206	0.0748183	0	35.1902	29.6501	26.011	39.2817	37.5564	34.1587	6.48548	5.46444	4.79377	7.23952	6.92157	6.29537	protein_coding	HGNC:4312	OTTHUMG00000010562.2_3
ENSG00000137962.13_3	ARHGAP29	1.06506	9.2316e-07	7.98658e-05	1	22.6307	26.1062	22.665	45.6111	49.9858	53.8024	1.23194	1.42113	1.23381	2.48291	2.72106	2.92882	protein_coding	HGNC:30207	OTTHUMG00000010643.4_3
ENSG00000117528.13_4	ABCD3	-0.0410143	0.536984	0.656373	0	91.9334	82.7344	78.7392	83.0037	81.9676	81.2915	12.0096	10.8079	10.286	10.8431	10.7077	10.6194	protein_coding	HGNC:67	OTTHUMG00000010717.3_4
ENSG00000117525.14_3	F3	-1.39118	9.2934e-07	7.98658e-05	-1	17.4971	21.4861	21.5553	7.20586	7.30895	8.57514	6.06276	7.44494	7.46893	2.49683	2.53255	2.97129	protein_coding	HGNC:3541	OTTHUMG00000010716.4_3
ENSG00000224081.9_5	SLC44A3-AS1	-1.5243	0.000284062	0.00320181	-1	1.35196	1.07616	1.05927	0.525833	0.268408	0.405444	0.131963	0.105042	0.103394	0.0513258	0.0261989	0.0395748	transcribed_processed_pseudogene	HGNC:49057	OTTHUMG00000010701.5_5
ENSG00000143036.17_4	SLC44A3	-1.24794	5.52289e-05	0.00107922	-1	2.86067	2.31931	2.25305	0.99324	1.17686	0.952794	0.997097	0.808404	0.78531	0.346197	0.4102	0.3321	protein_coding	HGNC:28689	OTTHUMG00000010700.7_4
ENSG00000117519.16_3	CNN3	-0.28849	0.0121995	0.0422501	0	719.42	818.253	849.048	581.98	697.716	674.497	258.505	294.018	305.084	209.12	250.706	242.363	protein_coding	HGNC:2157	OTTHUMG00000010783.5_3
ENSG00000235501.6_6	AC105942.1	0.392058	0.0179101	0.0550428	0	6.42672	8.4794	8.23878	8.82231	11.3351	10.2577	2.55332	3.36885	3.27325	3.50509	4.5034	4.07538	lncRNA	NA	OTTHUMG00000010780.4_6
ENSG00000172339.10_3	ALG14	-0.0258729	0.733891	0.818274	0	10.4826	10.91	10.8617	10.8088	10.9015	9.97392	1.08729	1.13163	1.12662	1.12113	1.13074	1.03453	protein_coding	HGNC:28287	OTTHUMG00000010781.4_3
ENSG00000152078.10_4	TMEM56	-1.29825	0.000429625	0.00425363	-1	3.76198	2.91305	2.52207	0.973764	1.11492	1.64205	0.509408	0.394455	0.341513	0.131857	0.150972	0.222349	protein_coding	HGNC:26477	OTTHUMG00000010847.3_4
ENSG00000122481.17_4	RWDD3	-0.15639	0.274565	0.404321	0	5.30988	4.11909	4.48929	4.45984	3.67512	4.33825	2.75552	2.13757	2.32968	2.3144	1.90717	2.2513	protein_coding	HGNC:21393	OTTHUMG00000010910.2_4
ENSG00000228502.1_4	EEF1A1P11	0.155971	0.520422	0.641403	0	1.50871	1.39159	2.16898	1.40222	2.18856	2.08804	1.08618	1.00186	1.56154	1.00952	1.57563	1.50327	processed_pseudogene	HGNC:3206	OTTHUMG00000010710.1_4
ENSG00000137970.7_4	RPL7P9	-0.0842195	0.593236	0.704352	0	3.0762	3.24703	3.0433	2.49284	3.57189	2.77729	4.11808	4.34677	4.07403	3.33713	4.78164	3.71793	processed_pseudogene	HGNC:37028	OTTHUMG00000010686.1_4
ENSG00000117569.18_2	PTBP2	-0.475089	0.000382605	0.00392792	0	25.844	23.9167	22.1606	18.6184	15.9599	17.13	1.99768	1.84871	1.71296	1.43916	1.23367	1.32411	protein_coding	HGNC:17662	OTTHUMG00000010685.2_2
ENSG00000188641.13_4	DPYD	-0.772071	1.03341e-05	0.000360455	-1	37.5218	32.2662	33.0224	20.7607	18.355	21.0628	5.26179	4.52478	4.63082	2.91132	2.57397	2.9537	protein_coding	HGNC:3012	OTTHUMG00000039683.5_4
ENSG00000162627.17_5	SNX7	-0.0841716	0.281953	0.411653	0	54.3528	47.4438	49.0123	44.0336	50.3987	47.8221	26.2955	22.953	23.7118	21.3032	24.3825	23.136	protein_coding	HGNC:14971	OTTHUMG00000010723.7_5
ENSG00000117598.12_3	PLPPR5	-0.504008	0.00614262	0.0263203	0	14.6169	10.7802	10.7945	9.52342	8.15547	7.8048	3.19774	2.35838	2.36151	2.08344	1.78418	1.70746	protein_coding	HGNC:31703	OTTHUMG00000010738.4_3
ENSG00000117600.12_3	PLPPR4	-1.48186	2.04489e-09	2.5418e-06	-1	94.6373	90.4716	88.6089	31.2773	33.6749	33.0437	17.0825	16.3306	15.9944	5.64572	6.07849	5.96456	protein_coding	HGNC:23496	OTTHUMG00000010763.2_3
ENSG00000099260.11_4	PALMD	-0.504216	0.00324203	0.0168101	0	8.30771	10.4091	10.7272	6.13472	7.3296	7.31827	1.02895	1.28921	1.32861	0.759811	0.907802	0.906399	protein_coding	HGNC:15846	OTTHUMG00000010764.3_4
ENSG00000156869.13_5	FRRS1	-0.208478	0.314961	0.447007	0	1.2344	1.54002	1.53006	0.973764	1.46592	1.29742	0.311875	0.389091	0.386574	0.246024	0.370369	0.327797	protein_coding	HGNC:27622	OTTHUMG00000010768.5_5
ENSG00000162688.17_4	AGL	-0.539114	4.59859e-05	0.000970318	0	26.2555	26.9968	24.0774	16.9045	17.6323	18.6707	3.21877	3.30964	2.95175	2.0724	2.16162	2.28892	protein_coding	HGNC:321	OTTHUMG00000010803.3_4
ENSG00000117620.15_5	SLC35A3	-0.246964	0.151594	0.262606	0	11.8933	11.0028	8.23878	9.19234	7.2883	9.71038	0.652226	0.603389	0.451811	0.504104	0.399688	0.532514	protein_coding	HGNC:11023	OTTHUMG00000010805.10_5
ENSG00000156875.14_4	MFSD14A	0.189857	0.120462	0.221624	0	4.60451	4.54585	5.32998	5.51151	5.12039	5.89921	1.5635	1.54358	1.80984	1.87148	1.73867	2.00313	protein_coding	HGNC:23363	OTTHUMG00000010755.3_4
ENSG00000156876.10_4	SASS6	-0.12079	0.352976	0.486761	0	11.1488	9.11025	8.30603	9.58184	8.2587	8.39269	2.80684	2.29362	2.09115	2.41235	2.07923	2.11296	protein_coding	HGNC:25403	OTTHUMG00000010754.4_4
ENSG00000122435.10_3	TRMT13	-0.138023	0.307525	0.439051	0	13.6372	11.8192	10.2228	12.0747	9.45621	10.8456	3.29879	2.85902	2.47286	2.92082	2.28742	2.62352	protein_coding	HGNC:25502	OTTHUMG00000010841.5_3
ENSG00000137992.14_2	DBT	-0.22895	0.0119491	0.0416679	0	20.0639	18.2019	18.7138	15.1712	16.4761	16.9678	1.77509	1.61036	1.65565	1.34223	1.45768	1.50118	protein_coding	HGNC:2698	OTTHUMG00000010921.2_2
ENSG00000224616.3_7	RTCA-AS1	-0.451624	0.0101413	0.0369372	0	2.54717	2.43064	2.1858	1.71383	1.63109	1.88531	0.253854	0.24224	0.217839	0.170802	0.162557	0.187893	lncRNA	HGNC:50573	OTTHUMG00000040490.5_7
ENSG00000137996.12_2	RTCA	-0.00771455	0.881859	0.924667	0	40.2454	38.3521	38.6046	38.3858	38.7952	39.3889	13.2517	12.6283	12.7114	12.6394	12.7742	12.9697	protein_coding	HGNC:17981	OTTHUMG00000010920.2_2
ENSG00000079335.20_6	CDC14A	-0.120117	0.266639	0.395847	0	4.91801	4.65717	5.32998	4.53774	4.43905	4.7437	0.755454	0.715388	0.818738	0.697042	0.681882	0.728678	protein_coding	HGNC:1718	OTTHUMG00000010987.16_6
ENSG00000162692.12_4	VCAM1	3.18932	1.37616e-07	2.50884e-05	1	0.822933	1.33592	1.41236	9.23129	12.4087	11.2105	0.136045	0.22085	0.233487	1.52608	2.05136	1.85329	protein_coding	HGNC:12663	OTTHUMG00000010982.5_4
ENSG00000162694.14_4	EXTL2	-0.254832	0.029286	0.0794027	0	40.2258	35.1978	30.1808	29.4272	29.8552	29.1717	10.0189	8.76659	7.51702	7.3293	7.43592	7.26568	protein_coding	HGNC:3516	OTTHUMG00000011814.3_4
ENSG00000162695.12_4	SLC30A7	0.0462738	0.607398	0.716068	0	21.3767	20.2429	17.4696	19.6311	19.7589	21.5899	2.48566	2.35383	2.03135	2.28268	2.29755	2.51045	protein_coding	HGNC:19306	OTTHUMG00000011815.3_4
ENSG00000117543.21_5	DPH5	0.18895	0.00855784	0.0328315	0	28.7635	27.3864	27.8269	30.8099	32.7664	32.1517	9.68467	9.22101	9.36932	10.3737	11.0325	10.8255	protein_coding	HGNC:24270	OTTHUMG00000010829.3_5
ENSG00000233184.7_7	AC093157.1	0.365387	0.002918	0.0155912	0	5.66256	5.77044	5.24591	7.32271	6.93731	7.2169	0.573831	0.584763	0.531609	0.742066	0.703011	0.731344	lncRNA	NA	OTTHUMG00000010831.10_7
ENSG00000183298.5_4	RPSAP19	-0.00745407	0.954713	0.971119	0	2.97823	2.50485	2.87516	2.59021	2.76666	2.95974	3.38436	2.84643	3.26723	2.94342	3.14394	3.36334	processed_pseudogene	HGNC:36508	OTTHUMG00000010943.1_4
ENSG00000060718.22_5	COL11A1	0.521026	0.0304955	0.081774	0	295.041	500.173	497.773	508.247	652.479	694.85	32.4542	55.0185	54.7545	55.9066	71.7719	76.4327	protein_coding	HGNC:2186	OTTHUMG00000010872.11_5
ENSG00000185946.16_4	RNPC3	0.299043	0.114824	0.214236	0	17.0857	13.0438	12.4422	21.2865	13.8127	17.1908	2.48808	1.89949	1.81189	3.09982	2.01146	2.5034	protein_coding	HGNC:18666	OTTHUMG00000166613.3_4
ENSG00000240038.6_3	AMY2B	0.341934	0.150393	0.26116	0	3.19376	3.80367	2.82472	5.39465	2.97313	4.05444	0.426347	0.507765	0.377082	0.720151	0.396894	0.541242	protein_coding	HGNC:478	OTTHUMG00000011024.6_3
ENSG00000198890.8_4	PRMT6	-0.0850104	0.250677	0.378029	0	36.2874	30.9489	32.7365	32.0563	31.3005	30.8746	8.3708	7.1393	7.55168	7.39477	7.22041	7.12216	protein_coding	HGNC:18241	OTTHUMG00000010964.3_4
ENSG00000134215.16_4	VAV3	-0.523278	0.0119543	0.0416756	0	80.4907	51.7484	53.6866	48.2792	40.736	40.2606	11.0171	7.08301	7.34828	6.60816	5.5757	5.51062	protein_coding	HGNC:12659	OTTHUMG00000010995.5_4
ENSG00000085491.17_4	SLC25A24	-0.0844501	0.40798	0.539802	0	42.2243	35.1051	31.9295	35.3087	33.9639	33.7127	6.27777	5.21931	4.74717	5.24958	5.04964	5.01229	protein_coding	HGNC:20662	OTTHUMG00000011013.8_4
ENSG00000162636.16_3	FAM102B	-0.128381	0.202196	0.32233	0	31.5066	26.4401	24.6154	25.8632	25.5194	24.1036	3.36969	2.82782	2.63267	2.76612	2.72935	2.57793	protein_coding	HGNC:27637	OTTHUMG00000010967.4_3
ENSG00000134186.12_3	PRPF38B	-0.100223	0.22602	0.350184	0	64.13	61.2854	59.4201	63.061	51.5756	57.7555	9.22071	8.81171	8.5435	9.067	7.41561	8.30417	protein_coding	HGNC:25512	OTTHUMG00000010991.4_3
ENSG00000116266.11_3	STXBP3	-0.13145	0.138052	0.244853	0	49.8266	42.0445	40.8408	41.7161	39.394	39.9971	8.45666	7.13585	6.93157	7.08012	6.68602	6.78837	protein_coding	HGNC:11446	OTTHUMG00000011122.4_3
ENSG00000162641.20_5	AKNAD1	-0.588945	0.0218797	0.0638551	0	1.19521	0.890615	0.891133	0.681635	0.557462	0.729799	0.237192	0.176744	0.176847	0.135272	0.11063	0.14483	protein_coding	HGNC:28398	OTTHUMG00000011231.9_5
ENSG00000121957.14_6	GPSM2	-0.177312	0.0617839	0.136894	0	87.4856	70.7111	71.8791	68.3777	67.68	67.3645	9.58222	7.74492	7.87285	7.48935	7.41293	7.37837	protein_coding	HGNC:29501	OTTHUMG00000011730.5_6
ENSG00000121940.15_3	CLCC1	0.0459554	0.503393	0.627115	0	26.2947	28.611	28.5667	26.9538	29.5661	29.6785	5.29707	5.7637	5.75477	5.42985	5.95611	5.97875	protein_coding	HGNC:29675	OTTHUMG00000011732.1_3
ENSG00000085433.15_6	WDR47	-0.20806	0.00831178	0.0321673	0	36.1699	39.2798	37.0745	31.6473	31.5482	34.2195	8.17768	8.88081	8.38221	7.15518	7.13277	7.73671	protein_coding	HGNC:29141	OTTHUMG00000011734.4_6
ENSG00000244716.3_5	BX679664.3	0.341722	0.116412	0.216	0	0.744559	0.834952	0.722995	1.01271	1.11492	0.790616	1.34155	1.50442	1.30269	1.82471	2.00887	1.42453	processed_pseudogene	NA	OTTHUMG00000057601.1_5
ENSG00000197780.9_2	TAF13	-0.195225	0.121538	0.222819	0	33.1916	29.9469	25.2376	25.0842	23.2689	28.7865	23.7083	21.3907	18.0268	17.9173	16.6206	20.5618	protein_coding	HGNC:11546	OTTHUMG00000042363.4_2
ENSG00000273382.1_7	AL356488.3	-0.343551	0.100316	0.193786	0	1.50871	2.11521	2.1858	1.4217	1.42463	1.74341	0.522407	0.732414	0.756855	0.492277	0.493291	0.603674	lncRNA	NA	OTTHUMG00000186359.1_7
ENSG00000215717.6_4	TMEM167B	-0.14952	0.0230169	0.0661618	0	41.0487	42.8794	41.816	36.1072	38.4855	38.7807	8.97435	9.3746	9.14211	7.89401	8.41398	8.47851	protein_coding	HGNC:30187	OTTHUMG00000042364.4_4
ENSG00000116299.17_3	KIAA1324	-0.367174	0.0610977	0.135858	0	1.03846	0.964833	1.00883	0.779011	0.70199	0.851433	0.11295	0.104942	0.109727	0.0847304	0.076353	0.0926074	protein_coding	HGNC:29618	OTTHUMG00000011725.6_3
ENSG00000031698.13_3	SARS	0.100627	0.155827	0.268205	0	195.505	204.879	216.108	208.834	234.712	217.521	50.7938	53.229	56.1466	54.2566	60.9801	56.5136	protein_coding	HGNC:10537	OTTHUMG00000011726.4_3
ENSG00000143126.8_3	CELSR2	-0.338464	0.0014303	0.0095865	0	206.87	237.256	236.722	191.306	171.74	175.436	16.1239	18.4923	18.4507	14.9108	13.3858	13.6739	protein_coding	HGNC:3231	OTTHUMG00000012003.2_3
ENSG00000134222.16_5	PSRC1	-0.816137	1.09439e-06	8.75062e-05	-1	81.6075	77.9845	76.2171	48.4935	42.5736	42.8352	28.5841	27.3151	26.696	16.9855	14.9119	15.0036	protein_coding	HGNC:24472	OTTHUMG00000012000.6_5
ENSG00000134243.12_4	SORT1	-0.598364	9.24012e-06	0.000332471	-1	329.428	338.675	339.589	205.776	223.811	236.009	36.0938	37.1069	37.2071	22.5458	24.5218	25.8583	protein_coding	HGNC:11186	OTTHUMG00000011999.5_4
ENSG00000143106.13_3	PSMA5	-0.0134906	0.824438	0.885927	0	99.5749	103.627	107.625	96.8701	108.602	102.496	17.3657	18.0723	18.7697	16.894	18.94	17.8752	protein_coding	HGNC:9534	OTTHUMG00000012001.3_3
ENSG00000162650.16_3	ATXN7L2	0.156382	0.251639	0.379079	0	18.9862	17.701	16.8475	24.3246	17.6736	17.6165	3.62887	3.38321	3.22008	4.6492	3.37799	3.36708	protein_coding	HGNC:28713	OTTHUMG00000011027.2_3
ENSG00000174151.14_5	CYB561D1	0.493204	2.57065e-05	0.000669496	0	17.7714	17.6082	16.5952	24.461	23.8676	24.8132	3.12328	3.09459	2.91656	4.29894	4.19467	4.36084	protein_coding	HGNC:26804	OTTHUMG00000011051.6_5
ENSG00000181754.7_3	AMIGO1	-0.132297	0.190334	0.308237	0	9.91439	9.16591	8.77682	7.73169	9.04328	8.63596	1.92849	1.7829	1.70722	1.50393	1.75905	1.67982	protein_coding	HGNC:20824	OTTHUMG00000011653.2_3
ENSG00000065135.11_4	GNAI3	-0.0334733	0.5912	0.702423	0	151.91	137.6	134.712	134.574	138.251	141.642	5.59046	5.06385	4.95758	4.9525	5.08779	5.2126	protein_coding	HGNC:4387	OTTHUMG00000189112.2_4
ENSG00000116337.17_7	AMPD2	0.249024	0.0018813	0.0115195	0	66.4029	68.8186	69.6765	86.0613	77.6318	79.8117	9.69527	10.048	10.1732	12.5655	11.3348	11.653	protein_coding	HGNC:469	OTTHUMG00000011649.15_7
ENSG00000168765.17_3	GSTM4	-0.147087	0.0718722	0.151933	0	18.8295	18.2762	18.1757	15.2492	17.4672	17.2111	3.28785	3.19123	3.17369	2.66268	3.04997	3.00526	protein_coding	HGNC:4636	OTTHUMG00000011642.2_3
ENSG00000213366.13_4	GSTM2	-0.420567	0.0122337	0.0423472	0	5.68216	5.51068	5.26273	4.57669	3.34477	4.35852	0.623317	0.604506	0.577307	0.502051	0.366912	0.478118	protein_coding	HGNC:4634	OTTHUMG00000011638.8_4
ENSG00000134184.12_5	GSTM1	-0.69419	0.029155	0.079173	0	1.93977	1.09471	1.22741	0.70111	1.05298	0.871705	0.772202	0.435794	0.488618	0.279104	0.419182	0.347016	protein_coding	HGNC:4632	OTTHUMG00000011635.4_5
ENSG00000134202.10_2	GSTM3	-0.122556	0.178694	0.294949	0	14.8128	13.1551	13.1316	12.0552	13.5856	12.1025	3.11848	2.7695	2.76455	2.53794	2.86012	2.5479	protein_coding	HGNC:4635	OTTHUMG00000011640.2_2
ENSG00000184371.14_6	CSF1	0.749309	7.09867e-05	0.00125563	1	12.8926	13.2293	13.182	18.521	24.6316	22.9481	2.46136	2.52565	2.51662	3.53589	4.70248	4.38109	protein_coding	HGNC:2432	OTTHUMG00000011646.4_6
ENSG00000168710.18_4	AHCYL1	0.00167159	0.972152	0.982064	0	144.856	139.548	143.54	141.683	142.297	144.46	28.7698	27.7156	28.5084	28.1396	28.2616	28.6911	protein_coding	HGNC:344	OTTHUMG00000011652.4_4
ENSG00000143093.15_4	STRIP1	0.132223	0.0415996	0.102319	0	55.3912	51.0805	52.2574	60.1981	56.9437	56.8027	7.54238	6.9554	7.11566	8.19691	7.75378	7.73457	protein_coding	HGNC:25916	OTTHUMG00000170607.3_4
ENSG00000258634.3_7	AL160006.1	0.323936	0.0411749	0.10164	0	4.97679	6.25286	5.17866	7.65379	5.84303	7.03445	1.18045	1.48313	1.22833	1.81541	1.38592	1.66851	lncRNA	NA	OTTHUMG00000170608.1_7
ENSG00000162775.16_5	RBM15	0.0579427	0.515119	0.636704	0	11.2663	11.9491	10.8785	12.6979	10.757	12.0214	2.41249	2.55869	2.32945	2.71903	2.30342	2.57418	protein_coding	HGNC:14959	OTTHUMG00000011284.7_5
ENSG00000168679.18_5	SLC16A4	0.107726	0.154595	0.26656	0	18.1241	17.5896	17.0829	17.6836	20.048	19.1572	5.72823	5.55931	5.39913	5.58899	6.33628	6.05475	protein_coding	HGNC:10925	OTTHUMG00000011285.6_5
ENSG00000134248.13_3	LAMTOR5	-0.171605	0.0192319	0.0580353	0	70.8898	72.6779	70.3659	59.0296	67.3291	63.5939	29.6859	30.4346	29.4664	24.7193	28.1947	26.6306	protein_coding	HGNC:17955	OTTHUMG00000011568.5_3
ENSG00000121931.16_4	LRIF1	-0.0423462	0.496472	0.621522	0	21.8861	20.5955	20.6642	19.9622	21.0184	20.333	6.2496	5.88106	5.90068	5.70022	6.00183	5.80612	protein_coding	HGNC:30299	OTTHUMG00000011913.4_4
ENSG00000156171.14_2	DRAM2	-0.141933	0.0353433	0.0909502	0	29.4493	28.3512	27.6924	25.7658	25.1271	26.5769	9.38472	9.03481	8.82485	8.2109	8.00736	8.46936	protein_coding	HGNC:28769	OTTHUMG00000011911.6_2
ENSG00000134255.14_3	CEPT1	0.00844142	0.919561	0.948846	0	25.1191	23.5642	20.5633	23.3703	22.4017	23.8401	2.98397	2.79926	2.44278	2.77623	2.66117	2.83204	protein_coding	HGNC:24289	OTTHUMG00000012357.5_3
ENSG00000162777.17_4	DENND2D	0.456537	0.0193289	0.0582758	0	1.41074	1.6699	1.37873	1.8891	1.8995	2.3313	0.211284	0.250098	0.20649	0.282927	0.284484	0.349154	protein_coding	HGNC:26192	OTTHUMG00000012356.3_4
ENSG00000064886.14_4	CHI3L2	0.396828	0.0693121	0.148102	0	2.99783	1.81834	2.20261	2.92129	3.42736	2.87865	0.909811	0.551848	0.668471	0.886584	1.04017	0.873643	protein_coding	HGNC:1933	OTTHUMG00000012174.10_4
ENSG00000173947.14_4	PIFO	0.396579	0.0182298	0.0557743	0	6.91656	7.18058	8.28922	8.00434	11.1699	10.3388	1.75147	1.81833	2.09907	2.02693	2.82854	2.61809	protein_coding	HGNC:27009	OTTHUMG00000011168.2_4
ENSG00000116455.14_4	WDR77	-0.00896485	0.91161	0.943676	0	38.913	45.0688	46.5239	40.9371	45.65	43.1595	14.4927	16.7854	17.3273	15.2466	17.0018	16.0743	protein_coding	HGNC:29652	OTTHUMG00000011748.3_4
ENSG00000116459.11_4	ATP5PB	-0.0788113	0.242983	0.369885	0	165.253	171.128	175.15	150.388	172.772	161.205	52.6618	54.5341	55.8157	47.9248	55.058	51.3718	protein_coding	HGNC:840	OTTHUMG00000011745.3_4
ENSG00000116473.14_2	RAP1A	-0.155111	0.0374431	0.0947616	0	55.3521	51.9154	49.9707	44.3842	47.5908	49.2209	10.0058	9.38457	9.03303	8.02317	8.60281	8.89749	protein_coding	HGNC:9855	OTTHUMG00000011959.2_2
ENSG00000197852.12_6	INKA2	0.861919	1.82883e-07	2.96975e-05	1	23.1597	23.3415	23.4385	44.4037	41.3967	41.3147	3.62266	3.65111	3.66627	6.94567	6.47532	6.4625	protein_coding	HGNC:28045	OTTHUMG00000011953.7_6
ENSG00000227811.3_6	INKA2-AS1	0.588305	0.00234972	0.0134877	1	1.74383	1.61424	1.54687	2.23966	2.47761	2.65566	0.722384	0.668699	0.640792	0.927779	1.02635	1.10011	lncRNA	HGNC:49446	OTTHUMG00000011954.3_6
ENSG00000064703.12_3	DDX20	-0.0373861	0.511978	0.634256	0	31.9572	30.5407	30.7861	30.6346	29.2771	30.9759	5.72198	5.46834	5.51229	5.48516	5.24209	5.54627	protein_coding	HGNC:2743	OTTHUMG00000011956.4_3
ENSG00000171385.9_3	KCND3	-1.06708	8.15929e-05	0.00138434	-1	19.2214	20.5955	19.3695	6.9332	10.6744	10.6632	2.44453	2.61929	2.46338	0.88175	1.35754	1.35612	protein_coding	HGNC:6239	OTTHUMG00000011989.1_3
ENSG00000143079.15_5	CTTNBP2NL	-0.235309	0.00300677	0.0159162	0	70.302	78.1515	75.41	62.4378	62.1261	65.6211	9.53765	10.6026	10.2306	8.47073	8.42845	8.90261	protein_coding	HGNC:25330	OTTHUMG00000011154.5_5
ENSG00000134245.18_3	WNT2B	0.48877	0.0774467	0.160956	0	1.01887	1.72557	1.98403	1.8891	2.58084	2.20967	0.0823396	0.139451	0.160339	0.152667	0.20857	0.178574	protein_coding	HGNC:12781	OTTHUMG00000011157.3_3
ENSG00000007341.19_4	ST7L	0.0755358	0.255003	0.382572	0	16.4979	17.3484	16.0404	17.372	17.8181	17.3733	2.03476	2.13967	1.97834	2.14257	2.1976	2.14273	protein_coding	HGNC:18441	OTTHUMG00000011753.8_4
ENSG00000116489.13_3	CAPZA1	-0.080368	0.207118	0.328187	0	160.942	153.241	146.566	137.593	149.441	148.737	46.0493	43.8459	41.936	39.3685	42.7586	42.5571	protein_coding	HGNC:1488	OTTHUMG00000011769.3_3
ENSG00000155363.18_2	MOV10	0.0243646	0.767306	0.843734	0	81.4704	90.3047	89.9372	98.1554	80.4191	87.5962	12.5166	13.8738	13.8174	15.08	12.3551	13.4577	protein_coding	HGNC:7200	OTTHUMG00000011906.1_2
ENSG00000155366.16_4	RHOC	0.172426	0.0633696	0.139458	0	221.839	254.122	261.321	260.638	299.605	270.695	55.0743	63.0889	64.876	64.7065	74.3806	67.2033	protein_coding	HGNC:669	OTTHUMG00000011905.6_4
ENSG00000155367.15_3	PPM1J	0.924767	0.00165577	0.0105644	1	0.685778	0.853506	0.739808	1.12957	1.56915	1.64205	0.238614	0.296975	0.257414	0.393029	0.545982	0.571346	protein_coding	HGNC:20785	OTTHUMG00000012019.5_3
ENSG00000155380.11_6	SLC16A1	0.00991191	0.864335	0.913579	0	193.174	182.632	176.259	184.567	179.565	191.714	36.3655	34.381	33.1814	34.7454	33.8036	36.0908	protein_coding	HGNC:10922	OTTHUMG00000012129.2_6
ENSG00000226419.8_6	SLC16A1-AS1	0.177309	0.113155	0.211853	0	4.60451	4.73139	4.20346	5.33623	5.03781	4.92615	0.363217	0.373226	0.331581	0.420938	0.397397	0.388589	lncRNA	HGNC:49445	OTTHUMG00000012128.11_6
ENSG00000198799.12_4	LRIG2	-0.0123234	0.883636	0.925891	0	15.8121	16.161	15.1661	16.2034	13.9159	16.6029	1.26831	1.2963	1.2165	1.29971	1.11622	1.33175	protein_coding	HGNC:20889	OTTHUMG00000012133.4_4
ENSG00000081026.19_4	MAGI3	-0.326641	0.0009981	0.00748192	0	24.6292	23.2488	23.2703	18.8131	17.8594	20.0492	2.92717	2.7631	2.76567	2.23593	2.12259	2.38284	protein_coding	HGNC:29647	OTTHUMG00000011737.4_4
ENSG00000116793.16_5	PHTF1	-0.175056	0.0414416	0.102114	0	67.363	56.9808	57.352	53.1286	52.7731	54.9985	9.39511	7.94711	7.99888	7.40984	7.36026	7.67064	protein_coding	HGNC:8939	OTTHUMG00000011800.3_5
ENSG00000232450.1_5	AL133517.1	0.0100825	0.957211	0.972587	0	1.07765	1.09471	1.05927	1.24642	0.867164	1.13524	1.44071	1.46352	1.41614	1.66633	1.15931	1.5177	transcribed_processed_pseudogene	NA	OTTHUMG00000011942.1_5
ENSG00000081019.13_5	RSBN1	-0.390542	0.00476298	0.0219087	0	19.4173	16.866	14.9979	13.36	12.099	13.6229	2.84753	2.47339	2.19943	1.95924	1.77431	1.99779	protein_coding	HGNC:25642	OTTHUMG00000011938.3_5
ENSG00000134262.13_3	AP4B1	0.057224	0.382812	0.516295	0	15.6357	14.9735	15.8723	16.554	15.7535	16.0556	2.67415	2.56088	2.7146	2.83119	2.69428	2.74595	protein_coding	HGNC:572	OTTHUMG00000011943.5_3
ENSG00000118655.7_5	DCLRE1B	-0.0169057	0.788089	0.859019	0	27.725	27.1266	27.4738	28.6871	27.0472	25.6241	7.16779	7.01309	7.10284	7.41652	6.99257	6.62463	protein_coding	HGNC:17641	OTTHUMG00000011937.5_5
ENSG00000163349.22_6	HIPK1	-0.00305836	0.964354	0.9773	0	71.2229	74.4406	66.3306	75.5836	67.0813	68.8444	7.78563	8.13736	7.25083	8.26231	7.33289	7.52562	protein_coding	HGNC:19006	OTTHUMG00000011983.8_6
ENSG00000116774.12_3	OLFML3	0.116118	0.586847	0.698707	0	3.7032	2.13377	2.33712	2.94077	2.99378	2.89892	1.31273	0.756386	0.828473	1.04246	1.06125	1.02762	protein_coding	HGNC:24956	OTTHUMG00000011980.3_3
ENSG00000134207.16_7	SYT6	0.167649	0.705875	0.797046	0	1.97896	0.70507	0.907947	1.967	0.805223	1.21633	0.387727	0.138141	0.177889	0.385385	0.157763	0.23831	protein_coding	HGNC:18638	OTTHUMG00000011755.6_7
ENSG00000197323.12_4	TRIM33	-0.205476	0.0598861	0.133851	0	51.159	51.3402	43.7496	45.7085	37.0816	43.9907	5.32684	5.34571	4.55535	4.75932	3.86105	4.58045	protein_coding	HGNC:16290	OTTHUMG00000011891.3_4
ENSG00000116752.6_3	BCAS2	-0.233536	0.00387599	0.0190208	0	35.3861	33.4537	31.795	28.4923	28.8642	28.2189	27.4524	25.9532	24.6664	22.1042	22.3927	21.8921	protein_coding	HGNC:975	OTTHUMG00000011898.2_3
ENSG00000213281.5_3	NRAS	-0.113066	0.138523	0.24534	0	145.169	136.171	122.237	122.733	121.692	128.688	33.5574	31.4774	28.2562	28.3711	28.1304	29.7476	protein_coding	HGNC:7989	OTTHUMG00000012059.3_3
ENSG00000009307.16_7	CSDE1	-0.0751294	0.240796	0.36762	0	624.097	645.38	649.787	574.891	631.233	615.768	108.013	111.696	112.459	99.4965	109.248	106.571	protein_coding	HGNC:29905	OTTHUMG00000012060.6_7
ENSG00000052723.11_3	SIKE1	-0.165415	0.0786789	0.162774	0	38.188	36.4596	31.5427	29.7193	31.5276	33.4086	6.47913	6.18588	5.35167	5.0423	5.3491	5.66824	protein_coding	HGNC:26119	OTTHUMG00000012061.3_3
ENSG00000134198.10_4	TSPAN2	-0.518973	0.0358228	0.0917238	0	0.80334	0.927724	0.924761	0.486882	0.722636	0.64871	0.235376	0.271821	0.270952	0.142655	0.211731	0.19007	protein_coding	HGNC:20659	OTTHUMG00000011878.4_4
ENSG00000173218.15_3	VANGL1	0.0312309	0.570115	0.684629	0	40.1082	41.1538	40.5213	39.7101	41.8097	42.9365	4.43429	4.5499	4.47997	4.39028	4.62241	4.74699	protein_coding	HGNC:15512	OTTHUMG00000011971.4_3
ENSG00000163399.16_4	ATP1A1	0.226089	0.00245094	0.013865	0	468.798	481.21	491.149	559.798	554.345	571.534	64.4218	66.1276	67.4933	76.927	76.1776	78.5398	protein_coding	HGNC:799	OTTHUMG00000012109.10_4
ENSG00000203865.10_5	ATP1A1-AS1	0.411364	0.134587	0.240134	0	1.21481	1.35448	1.5805	1.18799	2.29179	2.06776	0.186492	0.207933	0.242631	0.182375	0.351825	0.317434	lncRNA	HGNC:28262	OTTHUMG00000012111.5_5
ENSG00000116815.16_5	CD58	0.0568468	0.60352	0.71298	0	21.4159	17.3484	16.4776	19.7479	17.6943	19.9681	12.0044	9.72446	9.2363	11.0695	9.91831	11.1929	protein_coding	HGNC:1688	OTTHUMG00000022749.5_5
ENSG00000143061.17_4	IGSF3	-0.654381	0.000125504	0.00185716	-1	348.12	295.944	292.813	223.518	181.217	190.457	47.0433	39.9924	39.5693	30.2051	24.4887	25.7375	protein_coding	HGNC:5950	OTTHUMG00000022751.4_4
ENSG00000134247.10_3	PTGFRN	-0.122222	0.0434716	0.105725	0	183.397	193.189	187.777	177.673	166.929	173.915	28.267	29.7764	28.9422	27.3849	25.7289	26.8057	protein_coding	HGNC:9601	OTTHUMG00000012028.2_3
ENSG00000134256.12_2	CD101	-0.0230503	0.872798	0.918995	0	1.46952	1.65135	1.5805	1.51907	1.63109	1.47987	0.383888	0.431387	0.412879	0.396832	0.426095	0.386591	protein_coding	HGNC:5949	OTTHUMG00000012029.1_2
ENSG00000116830.12_3	TTF2	-0.0228857	0.719582	0.807316	0	53.5298	58.6878	58.1254	58.6985	52.9383	56.0324	5.26972	5.7775	5.72213	5.77855	5.21149	5.51608	protein_coding	HGNC:12398	OTTHUMG00000012030.6_3
ENSG00000134253.10_6	TRIM45	0.232822	0.0437723	0.106267	0	21.8273	25.2712	23.9429	30.4009	23.9915	29.0906	4.9971	5.78553	5.48143	6.95992	5.49257	6.65994	protein_coding	HGNC:19018	OTTHUMG00000012119.5_6
ENSG00000198162.12_4	MAN1A2	-0.154523	0.0220526	0.0643049	0	81.6271	87.8555	81.278	73.2271	73.7295	78.3318	8.4439	9.08818	8.40778	7.57495	7.62693	8.10301	protein_coding	HGNC:6822	OTTHUMG00000012149.2_4
ENSG00000196505.11_3	GDAP2	-0.0598026	0.414557	0.546388	0	15.2243	14.7879	14.9139	13.36	14.9276	14.819	1.45173	1.41012	1.42213	1.27396	1.42344	1.41308	protein_coding	HGNC:18010	OTTHUMG00000012199.3_3
ENSG00000065183.16_3	WDR3	0.112328	0.164566	0.278341	0	48.0044	55.5707	56.9316	55.9915	56.9437	60.6139	4.67151	5.40781	5.54025	5.44876	5.54143	5.89859	protein_coding	HGNC:12755	OTTHUMG00000012197.3_3
ENSG00000116874.11_3	WARS2	-0.150187	0.0802393	0.164799	0	10.7373	11.8006	11.5511	10.5751	9.82785	10.3186	2.79109	3.06749	3.00263	2.74892	2.55468	2.68223	protein_coding	HGNC:12730	OTTHUMG00000012335.3_3
ENSG00000231365.6_7	WARS2-AS1	0.162898	0.176046	0.291908	0	3.50726	3.97066	3.36277	4.01191	4.00547	4.11526	0.305804	0.346208	0.293205	0.349805	0.349243	0.358816	lncRNA	HGNC:40612	OTTHUMG00000012342.2_7
ENSG00000143067.5_3	ZNF697	0.00342114	0.980436	0.987562	0	8.6408	6.77238	6.70872	6.66055	8.46517	7.03445	1.54881	1.21391	1.20249	1.19386	1.51733	1.26088	protein_coding	HGNC:32034	OTTHUMG00000012962.4_3
ENSG00000092621.12_4	PHGDH	-0.30087	0.00260828	0.0144502	0	55.2737	49.3549	50.9795	40.6644	45.6706	39.9768	5.99693	5.35477	5.53103	4.41189	4.95504	4.33729	protein_coding	HGNC:8923	OTTHUMG00000012100.6_4
ENSG00000134250.20_4	NOTCH2	0.234222	0.00453012	0.0212197	0	109.391	124.538	115.578	140.261	132.077	138.783	5.48878	6.24875	5.79921	7.03768	6.62706	6.96355	protein_coding	HGNC:7882	OTTHUMG00000012177.8_4
ENSG00000273131.1	RP6-42F4.1	0.067639	0.668939	0.76757	0	2.7823	2.20798	2.30349	2.74602	2.18856	2.6962	0.727018	0.576949	0.601906	0.717537	0.571872	0.704521	processed_transcript	NA	OTTHUMG00000186401.1
ENSG00000188610.8	FAM72B	-0.274979	0.148496	0.258845	0	5.48622	3.87789	3.78311	4.10929	3.20025	3.52736	1.82145	1.28748	1.25601	1.3643	1.0625	1.1711	protein_coding	NA	OTTHUMG00000040902.4
ENSG00000171943.7	SRGAP2C	0.0421361	0.731906	0.816926	0	3.44848	2.93161	3.56453	3.34975	3.4893	3.40573	3.55881	3.02539	3.67857	3.45691	3.60093	3.51469	pseudogene	NA	OTTHUMG00000041445.2
ENSG00000269996.1	RP11-343N15.5	-0.355239	0.0225052	0.0651521	0	9.64007	8.81338	7.38127	7.16691	5.86368	7.13582	7.27004	6.64659	5.56657	5.40491	4.42208	5.38146	lincRNA	NA	OTTHUMG00000184096.1
ENSG00000215784.6_3	FAM72D	-0.149376	0.443242	0.574668	0	1.92018	1.31737	1.4628	1.36327	1.56915	1.29742	0.792479	0.543693	0.603716	0.562637	0.647608	0.535461	protein_coding	HGNC:33593	OTTHUMG00000074801.5_3
ENSG00000196369.6	SRGAP2B	0.0396231	0.756518	0.835666	0	12.442	9.14736	10.7104	11.2762	11.9958	9.91311	8.71897	6.4102	7.50554	7.90203	8.40628	6.94682	pseudogene	NA	OTTHUMG00000041442.6
ENSG00000225241.3	RP11-640M9.2	0.14858	0.308335	0.440011	0	13.5	11.244	12.19	16.5929	11.4796	12.8323	1.74667	1.45478	1.57718	2.14684	1.48526	1.66028	pseudogene	NA	OTTHUMG00000182425.1
ENSG00000215861.4	WI2-1896O14.1	-0.212276	0.334123	0.467076	0	1.07765	1.2246	1.24422	0.759536	1.07363	1.2366	2.85849	3.24826	3.30033	2.01468	2.84783	3.28012	pseudogene	NA	OTTHUMG00000078073.1
ENSG00000168614.13	NBPF9	0.315706	0.03516	0.090689	0	11.1096	9.38857	11.0635	15.2297	11.0254	13.0148	1.51625	1.28137	1.50996	2.07857	1.50476	1.77627	protein_coding	NA	OTTHUMG00000013845.2
ENSG00000178104.19_4	PDE4DIP	-0.123867	0.115224	0.214581	0	54.9994	64.8294	62.5138	54.1413	55.0855	58.1407	1.99208	2.34812	2.26426	1.961	1.9952	2.10586	protein_coding	HGNC:15580	OTTHUMG00000013846.16_4
ENSG00000265808.3_1	SEC22B	-0.305217	0.00355086	0.0179752	0	80.236	78.4483	67.5748	57.4716	61.9403	63.675	15.7387	15.3881	13.2552	11.2734	12.1499	12.4902	protein_coding	HGNC:10700	OTTHUMG00000185008.3_1
ENSG00000177144.7_5	NUDT4B	-0.517107	0.190478	0.30836	0	1.72424	1.24315	0.605298	1.03219	0.722636	0.709527	1.44894	1.04466	0.508654	0.867387	0.607257	0.596241	protein_coding	HGNC:18012	OTTHUMG00000188673.2_5
ENSG00000264343.6_5	NOTCH2NLA	-0.0264316	0.903241	0.938932	0	1.03846	1.05761	1.10971	1.34379	0.805223	0.993338	0.351307	0.357783	0.37541	0.454599	0.272403	0.336041	protein_coding	HGNC:31862	OTTHUMG00000013754.5_5
ENSG00000286219.1_1	AC242843.1	-0.305069	0.164731	0.278518	0	1.88099	1.50291	1.22741	1.38275	1.07363	1.25688	0.362147	0.289356	0.236313	0.26622	0.206706	0.241986	protein_coding	NA	OTTHUMG00000193481.1_1
ENSG00000271425.8_2	NBPF10	0.171976	0.350019	0.48389	0	1.21481	1.29881	1.04246	1.40222	1.13557	1.4596	0.28101	0.300443	0.241142	0.324363	0.262681	0.337636	protein_coding	HGNC:31992	OTTHUMG00000013757.24_2
ENSG00000233396.8_5	LINC01719	0.37592	0.0326545	0.0858656	0	2.33164	1.96677	1.88315	2.49284	2.5189	3.00029	0.506439	0.427188	0.409025	0.54145	0.547112	0.651669	lncRNA	HGNC:52506	OTTHUMG00000042244.6_5
ENSG00000265972.5_2	TXNIP	-0.205095	0.00405998	0.0196295	0	297.549	285.368	288.962	243.422	258.766	254.153	82.4236	79.0493	80.045	67.4298	71.6803	70.4024	protein_coding	HGNC:16952	OTTHUMG00000013755.6_2
ENSG00000121851.13_4	POLR3GL	-0.0144954	0.878513	0.922645	0	15.0283	16.6805	17.1501	14.2559	17.302	16.8462	8.29836	9.21064	9.46996	7.87184	9.55383	9.30215	protein_coding	HGNC:28466	OTTHUMG00000013739.4_4
ENSG00000272031.3_4	ANKRD34A	0.34488	0.0354172	0.091009	0	1.31277	1.33592	1.47962	1.7333	1.75497	1.76368	0.357899	0.36421	0.403385	0.472547	0.478455	0.480829	protein_coding	HGNC:27639	OTTHUMG00000013740.6_4
ENSG00000271601.4_3	LIX1L	-0.338832	9.82306e-05	0.00157192	0	103.67	107.115	100.328	80.394	81.947	83.6431	25.989	26.8526	25.1512	20.1539	20.5432	20.9684	protein_coding	HGNC:28715	OTTHUMG00000013741.4_3
ENSG00000265241.6_4	RBM8A	-0.102276	0.0729132	0.153517	0	132.14	126.523	133.519	118.04	124.665	122.647	23.664	22.6581	23.9109	21.1389	22.3254	21.964	protein_coding	HGNC:9905	OTTHUMG00000013736.7_4
ENSG00000211451.12_2	GNRHR2	0.112428	0.632309	0.737424	0	1.07765	0.742179	0.924761	0.817962	1.23881	0.912249	0.429857	0.296043	0.368871	0.326271	0.494138	0.363881	transcribed_unitary_pseudogene	HGNC:16341	OTTHUMG00000013742.6_2
ENSG00000131779.11_4	PEX11B	0.0644317	0.288873	0.419117	0	26.3731	26.3659	27.2888	26.9148	29.05	27.7324	15.351	15.3469	15.8841	15.6664	16.9092	16.1422	protein_coding	HGNC:8853	OTTHUMG00000013756.3_4
ENSG00000143127.13_3	ITGA10	0.856634	0.01155	0.0406391	1	0.979682	0.742179	0.739808	1.98648	1.01169	1.43933	0.15695	0.118901	0.118521	0.318244	0.162078	0.230587	protein_coding	HGNC:6135	OTTHUMG00000013751.4_3
ENSG00000131788.16_4	PIAS3	0.165668	0.0141124	0.046983	0	49.474	52.0082	53.8547	59.3217	56.6134	58.3231	10.2942	10.8215	11.2057	12.3433	11.7797	12.1355	protein_coding	HGNC:16861	OTTHUMG00000013750.14_4
ENSG00000186364.12_3	NUDT17	0.100939	0.558358	0.674778	0	2.01815	1.94822	1.96722	2.59021	1.98209	1.78395	1.21795	1.17575	1.18722	1.56319	1.19619	1.07662	protein_coding	HGNC:26618	OTTHUMG00000013752.5_3
ENSG00000186141.9_3	POLR3C	0.122275	0.0861022	0.173053	0	29.606	28.9635	31.7277	33.6922	33.5923	31.0165	6.31258	6.1756	6.76497	7.18385	7.16253	6.61332	protein_coding	HGNC:30076	OTTHUMG00000013753.4_3
ENSG00000265491.5_3	RNF115	0.0104794	0.85041	0.904332	0	47.6322	43.937	46.2717	45.5722	45.7119	47.5586	4.30748	3.97332	4.18445	4.12119	4.13383	4.30083	protein_coding	HGNC:18154	OTTHUMG00000013758.7_3
ENSG00000174827.13_2	PDZK1	-0.203407	0.317498	0.449366	0	1.01887	1.00194	1.07609	1.09062	0.743283	0.851433	0.410835	0.404009	0.433905	0.439765	0.299711	0.34332	protein_coding	HGNC:8821	OTTHUMG00000013735.7_2
ENSG00000117262.19_3	GPR89A	-0.178135	0.197356	0.316942	0	2.7823	3.13571	2.70703	2.72654	2.53955	2.35158	0.500323	0.563875	0.486788	0.490297	0.456672	0.422869	protein_coding	HGNC:31984	OTTHUMG00000013738.6_3
ENSG00000198658.4	ABHD17AP2	0.0168949	0.8883	0.928786	0	22.807	21.5974	21.0845	19.8258	26.6962	19.7451	24.4448	23.1484	22.5987	21.2496	28.6133	21.163	pseudogene	NA	OTTHUMG00000047949.3
ENSG00000186275.7	NBPF12	0.0179445	0.893264	0.932406	0	3.85995	3.87789	4.15302	4.61564	3.44801	3.97335	0.295714	0.297088	0.318166	0.353608	0.264154	0.304401	protein_coding	NA	OTTHUMG00000043708.3
ENSG00000131791.8_3	PRKAB2	0.0388265	0.53374	0.653341	0	36.6989	39.0386	37.1081	38.4247	36.6893	40.8079	6.72141	7.14993	6.79636	7.0375	6.71965	7.47398	protein_coding	HGNC:9379	OTTHUMG00000014032.4_3
ENSG00000180867.11_3	PDIA3P1	0.00359927	0.978684	0.986258	0	2.88027	3.41402	2.70703	2.92129	3.1796	2.9192	0.865465	1.02585	0.813409	0.877792	0.955409	0.877163	transcribed_processed_pseudogene	HGNC:4607	OTTHUMG00000041049.2_3
ENSG00000131778.19_4	CHD1L	0.0576562	0.731388	0.816548	0	3.76198	2.85739	3.43002	4.18719	3.09701	3.16246	0.875083	0.664664	0.797865	0.973991	0.720403	0.735628	protein_coding	HGNC:1916	OTTHUMG00000150271.8_4
ENSG00000116128.11_4	BCL9	-0.208229	0.00661806	0.0276639	0	38.7562	41.6734	42.5726	36.633	35.3059	34.5438	6.1236	6.58451	6.72659	5.78812	5.57844	5.45802	protein_coding	HGNC:1008	OTTHUMG00000014031.3_4
ENSG00000162836.12_5	ACP6	-0.031242	0.772105	0.847142	0	6.83818	7.01359	6.13705	7.20586	6.25597	6.08166	0.570181	0.584807	0.511719	0.600839	0.521635	0.507101	protein_coding	HGNC:29609	OTTHUMG00000014019.8_5
ENSG00000188092.14_5	GPR89B	-0.0852282	0.664465	0.764172	0	0.999276	1.28026	1.34511	0.973764	1.30075	1.15552	0.194298	0.248932	0.261541	0.189338	0.252916	0.224677	protein_coding	HGNC:13840	OTTHUMG00000013452.6_5
ENSG00000122497.13	NBPF14	0.0217243	0.892917	0.932317	0	6.44631	5.9931	6.2043	7.089	4.70746	7.11554	1.74036	1.61801	1.67503	1.91388	1.27091	1.92104	protein_coding	NA	OTTHUMG00000013900.8
ENSG00000223612.3_5	AC241585.1	0.28918	0.100511	0.194053	0	2.4688	2.85739	2.7911	3.29132	3.92288	2.71648	4.75684	5.50557	5.37783	6.34166	7.55854	5.23406	processed_pseudogene	NA	OTTHUMG00000078264.1_5
ENSG00000203832.6	NBPF20	0.240905	0.224854	0.348772	0	1.35196	1.79978	1.6982	2.20071	1.54851	1.98668	0.0832386	0.110811	0.104556	0.135495	0.0953396	0.122317	protein_coding	NA	OTTHUMG00000042439.2
ENSG00000266338.6_2	NBPF15	0.118252	0.173955	0.289705	0	13.8723	15.6785	14.7625	17.2746	15.0102	15.8123	2.61446	2.95487	2.78224	3.25567	2.82891	2.98008	protein_coding	HGNC:28791	OTTHUMG00000013634.13_2
ENSG00000220323.4_5	HIST2H2BD	0.551388	0.00380408	0.0187909	0	2.7823	2.41208	2.37075	3.73926	3.20025	4.13553	0.770293	0.667797	0.656354	1.03523	0.886004	1.14494	transcribed_unprocessed_pseudogene	HGNC:20517	OTTHUMG00000035827.4_5
ENSG00000261716.2_7	HIST2H2BC	0.599688	0.0040319	0.0195351	1	3.54645	2.74606	3.06012	4.9662	3.90224	5.29104	0.550691	0.426407	0.475173	0.771149	0.605937	0.821591	transcribed_unprocessed_pseudogene	HGNC:20516	OTTHUMG00000035826.4_7
ENSG00000184678.10_2	HIST2H2BE	0.233723	0.0714214	0.15131	0	12.4616	15.3074	15.1493	14.4896	17.9214	18.1031	5.67984	6.97696	6.90486	6.6042	8.16836	8.25117	protein_coding	HGNC:4760	OTTHUMG00000012095.1_2
ENSG00000178096.9_3	BOLA1	0.0929764	0.297959	0.42883	0	10.9137	10.0009	10.9458	11.0814	12.2642	10.6429	7.46999	6.84522	7.49199	7.58483	8.39437	7.28467	protein_coding	HGNC:24263	OTTHUMG00000012087.4_3
ENSG00000159164.10_3	SV2A	0.0697908	0.174476	0.290406	0	149.049	149.976	152.367	154.536	158.216	161.022	31.1427	31.3364	31.836	32.2893	33.0581	33.6444	protein_coding	HGNC:20566	OTTHUMG00000012209.3_3
ENSG00000143368.10_4	SF3B4	-0.0370623	0.564919	0.680161	0	146.384	150.032	164.322	150.31	155.491	143.284	85.9062	88.0467	96.4328	88.2103	91.2504	84.0868	protein_coding	HGNC:10771	OTTHUMG00000012208.4_4
ENSG00000014914.21_3	MTMR11	-0.0453547	0.683944	0.778523	0	29.9979	27.3122	25.557	30.8489	23.2069	26.1917	6.56122	5.9738	5.5899	6.74734	5.07589	5.72872	protein_coding	HGNC:24307	OTTHUMG00000012207.8_3
ENSG00000264522.6_3	OTUD7B	0.0983644	0.113147	0.211853	0	27.0392	29.2048	28.7348	30.2062	30.454	30.3272	2.21724	2.39481	2.35628	2.47693	2.49725	2.48686	protein_coding	HGNC:16683	OTTHUMG00000012291.7_3
ENSG00000285184.3_3	AC244033.2	-0.44339	0.00346939	0.0176747	0	5.13354	5.84466	5.69989	3.71978	4.39776	4.1558	1.43235	1.63076	1.59037	1.03789	1.22705	1.15954	lncRNA	NA	OTTHUMG00000192484.3_3
ENSG00000136631.15_7	VPS45	-0.182243	0.00740251	0.0297599	0	72.7512	71.6945	72.4676	60.7434	63.9017	66.5334	10.9615	10.8022	10.9187	9.15224	9.6281	10.0246	protein_coding	HGNC:14579	OTTHUMG00000012511.10_7
ENSG00000023902.14_3	PLEKHO1	-0.349438	0.00123754	0.00864146	0	103.239	120.604	122.455	87.6388	94.6654	89.5423	15.5738	18.1934	18.4726	13.2205	14.2805	13.5077	protein_coding	HGNC:24310	OTTHUMG00000012510.6_3
ENSG00000143401.15_6	ANP32E	-0.78189	0.00015146	0.00210459	-1	126.164	95.203	88.3903	59.5554	59.5039	61.0396	35.0065	26.4159	24.5256	16.5248	16.5105	16.9366	protein_coding	HGNC:16673	OTTHUMG00000012547.6_6
ENSG00000117362.13_4	APH1A	0.0563859	0.388322	0.521638	0	188.726	200.592	209.299	198.726	218.856	204.932	54.3409	57.7577	60.2645	57.2202	63.0163	59.0071	protein_coding	HGNC:29509	OTTHUMG00000012545.4_4
ENSG00000159208.16_4	CIART	-0.107404	0.303635	0.434722	0	8.30771	9.14736	10.0379	8.95863	8.67164	7.90616	2.92937	3.22544	3.53944	3.1589	3.0577	2.78779	protein_coding	HGNC:25200	OTTHUMG00000012548.5_4
ENSG00000266472.5_2	MRPS21	0.0691682	0.201645	0.321714	0	63.2483	67.3713	67.4235	68.3777	69.146	70.2635	38.5425	41.055	41.0868	41.6683	42.1365	42.8175	protein_coding	HGNC:14046	OTTHUMG00000012544.4_2
ENSG00000117360.13_3	PRPF3	0.0737828	0.282041	0.411653	0	41.8128	43.5288	43.6319	48.435	41.8923	45.4097	7.73167	8.04897	8.06803	8.95618	7.74635	8.39677	protein_coding	HGNC:17348	OTTHUMG00000012807.3_3
ENSG00000163125.15_4	RPRD2	-0.0851235	0.141639	0.249277	0	50.6496	54.9769	52.6609	50.5968	49.1599	49.4642	5.79647	6.29171	6.02666	5.79043	5.62599	5.66081	protein_coding	HGNC:29039	OTTHUMG00000012808.2_4
ENSG00000143374.17_4	TARS2	0.150066	0.0172781	0.0537527	0	32.9565	31.8209	33.3418	36.4188	36.2144	36.2467	8.08352	7.80499	8.17803	8.93274	8.88261	8.89053	protein_coding	HGNC:30740	OTTHUMG00000012809.5_4
ENSG00000143369.15_4	ECM1	0.374914	0.0806013	0.165276	0	40.3237	23.4529	23.7748	37.8015	37.7836	37.8077	12.0011	6.98002	7.07582	11.2505	11.2451	11.2523	protein_coding	HGNC:3153	OTTHUMG00000012806.3_4
ENSG00000143382.14_3	ADAMTSL4	1.48333	3.20066e-05	0.00076508	1	2.50799	2.46775	1.91678	4.8883	7.22636	7.13582	0.389923	0.383667	0.298006	0.759996	1.1235	1.10942	protein_coding	HGNC:19706	OTTHUMG00000034863.5_3
ENSG00000143384.13_4	MCL1	0.090205	0.220809	0.344451	0	336.462	318.933	295.251	343.641	317.877	350.425	76.976	72.9657	67.5477	78.6185	72.7242	80.1705	protein_coding	HGNC:6943	OTTHUMG00000034867.3_4
ENSG00000143420.18_3	ENSA	-0.163311	0.0234142	0.0669312	0	216.686	220.798	227.895	186.943	209.936	197.309	39.4477	40.1963	41.4882	34.033	38.2189	35.9201	protein_coding	HGNC:3360	OTTHUMG00000035004.5_3
ENSG00000143457.11_3	GOLPH3L	-0.2722	0.00227803	0.013209	0	26.2555	25.0857	24.6659	19.8648	21.9062	21.1642	7.87507	7.52419	7.39829	5.95825	6.57055	6.34798	protein_coding	HGNC:24882	OTTHUMG00000035009.4_3
ENSG00000143387.13_3	CTSK	0.685013	0.0278511	0.0764676	0	1.27359	0.760734	0.907947	1.77225	1.11492	1.8245	0.698239	0.417069	0.497778	0.971629	0.611252	1.00027	protein_coding	HGNC:2536	OTTHUMG00000035008.4_3
ENSG00000143437.21_4	ARNT	-0.00571668	0.91863	0.948275	0	39.3636	36.3297	37.8143	37.042	37.4945	38.5172	6.10478	5.63425	5.8645	5.74473	5.8149	5.97351	protein_coding	HGNC:700	OTTHUMG00000035011.4_4
ENSG00000143379.12_3	SETDB1	0.127132	0.1043	0.199203	0	36.4834	38.4634	42.1186	43.9752	40.1166	43.788	5.14357	5.42273	5.93806	6.1998	5.65581	6.1734	protein_coding	HGNC:10761	OTTHUMG00000035003.7_3
ENSG00000143418.19_4	CERS2	0.055893	0.348473	0.482255	0	227.541	225.956	229.626	222.447	246.316	241.361	48.9968	48.6556	49.4458	47.8998	53.0396	51.9726	protein_coding	HGNC:14076	OTTHUMG00000035064.8_4
ENSG00000143409.15_6	MINDY1	0.185535	0.0728862	0.153484	0	14.0291	12.5985	14.1741	13.7496	16.249	16.4205	3.69964	3.32239	3.73788	3.62594	4.28507	4.3303	protein_coding	HGNC:25648	OTTHUMG00000035061.7_6
ENSG00000143363.17_6	PRUNE1	-0.123566	0.180545	0.297178	0	22.4543	23.6013	23.9429	18.891	23.4134	21.9751	7.1148	7.47823	7.58647	5.98575	7.4187	6.96295	protein_coding	HGNC:13420	OTTHUMG00000035062.5_6
ENSG00000143443.9_2	C1orf56	0.00838237	0.946081	0.964492	0	3.84036	4.24898	4.80876	4.01191	4.50099	4.48016	1.64751	1.82281	2.06296	1.72111	1.93093	1.92199	protein_coding	HGNC:26045	OTTHUMG00000035159.2_2
ENSG00000197622.13_3	CDC42SE1	0.0775636	0.414952	0.546704	0	200.992	165.84	170.576	207.509	176.323	183.2	48.0382	39.6367	40.7687	49.5959	42.1423	43.7858	protein_coding	HGNC:17719	OTTHUMG00000035158.4_3
ENSG00000213190.3_2	MLLT11	-0.366173	0.00025944	0.00301131	0	234.281	246.515	228.349	172.2	191.561	186.423	57.4923	60.4944	56.0365	42.2578	47.0087	45.748	protein_coding	HGNC:16997	OTTHUMG00000035160.2_2
ENSG00000143458.12_3	GABPB2	0.192259	0.266211	0.395384	0	1.07765	1.33592	1.0929	1.26589	1.40398	1.33797	0.117276	0.145383	0.118936	0.137762	0.152789	0.145605	protein_coding	HGNC:28441	OTTHUMG00000012193.6_3
ENSG00000143434.15_4	SEMA6C	0.136123	0.311777	0.443685	0	13.3825	12.3202	12.6272	17.1188	12.1816	12.7918	2.30375	2.12088	2.17373	2.94694	2.09702	2.20206	protein_coding	HGNC:10740	OTTHUMG00000012261.3_4
ENSG00000163156.11_3	SCNM1	-0.00206118	0.974616	0.983535	0	27.9014	30.0026	31.7445	29.6024	30.2268	29.719	8.54559	9.18916	9.72267	9.0666	9.25784	9.10231	protein_coding	HGNC:23136	OTTHUMG00000012258.9_3
ENSG00000163155.12_3	LYSMD1	-0.0915298	0.319504	0.451393	0	11.7366	10.0936	11.8033	10.3414	10.2408	10.9875	4.67966	4.02458	4.70626	4.12336	4.08325	4.38099	protein_coding	HGNC:32070	OTTHUMG00000012260.4_3
ENSG00000163159.12_3	VPS72	-0.139688	0.0427871	0.104507	0	71.3993	77.3907	78.4533	66.9366	72.2017	67.1618	15.7094	17.0277	17.2615	14.7275	15.886	14.7771	protein_coding	HGNC:11644	OTTHUMG00000012345.10_3
ENSG00000143398.20_5	PIP5K1A	-0.201721	0.00314115	0.0164522	0	122.343	124.482	131.4	110.366	109.882	108.639	22.6351	23.0309	24.3108	20.4193	20.3297	20.0997	protein_coding	HGNC:8994	OTTHUMG00000012351.22_5
ENSG00000159352.15_4	PSMD4	-0.0434857	0.469304	0.597522	0	176.402	175.433	187.525	168.208	183.983	171.178	58.2761	57.9559	61.9507	55.5692	60.7807	56.5505	protein_coding	HGNC:9561	OTTHUMG00000012349.12_4
ENSG00000143373.18_3	ZNF687	-0.0422197	0.453931	0.584729	0	61.4653	63.1966	64.3465	62.9247	62.6422	57.9988	9.71937	9.99313	10.175	9.95014	9.90548	9.17122	protein_coding	HGNC:29277	OTTHUMG00000012347.13_3
ENSG00000143393.16_7	PI4KB	0.0890292	0.111567	0.209685	0	154.555	157.082	163.918	166.884	172.731	166.232	28.3275	28.7907	30.0436	30.5872	31.6589	30.4678	protein_coding	HGNC:8984	OTTHUMG00000012348.14_7
ENSG00000143390.17_4	RFX5	0.0323062	0.509984	0.632817	0	83.1358	82.92	83.3966	87.4635	85.1472	82.4876	18.1282	18.0811	18.185	19.0719	18.5668	17.9868	protein_coding	HGNC:9986	OTTHUMG00000012495.24_4
ENSG00000237976.1_7	AL391069.2	-0.413739	0.00473649	0.0218741	0	4.82004	4.95405	5.43087	3.56398	4.1087	3.75036	7.79941	8.01626	8.78781	5.76695	6.64839	6.06854	lncRNA	NA	OTTHUMG00000012496.1_7
ENSG00000159377.11_3	PSMB4	0.0186797	0.79832	0.866522	0	225.131	240.021	253.704	225.972	259.901	242.395	105.944	112.951	119.39	106.34	122.306	114.068	protein_coding	HGNC:9541	OTTHUMG00000012494.5_3
ENSG00000143442.22_7	POGZ	-0.208331	0.0256866	0.0720288	0	89.3274	100.324	92.7619	89.5084	74.4935	80.4198	8.67173	9.73926	9.00513	8.68929	7.23167	7.80699	protein_coding	HGNC:18801	OTTHUMG00000012499.10_7
ENSG00000143375.15_5	CGN	-0.0782551	0.407168	0.539092	0	11.4035	13.6561	13.5183	11.802	12.8629	11.8998	1.72363	2.0641	2.04328	1.78386	1.94421	1.79864	protein_coding	HGNC:17429	OTTHUMG00000012497.16_5
ENSG00000143367.16_5	TUFT1	-0.417373	0.0461374	0.110596	0	35.4449	58.3724	58.0077	33.4585	41.3141	39.0037	9.14	15.0522	14.9582	8.62778	10.6535	10.0577	protein_coding	HGNC:12422	OTTHUMG00000012536.4_5
ENSG00000143376.14_5	SNX27	-0.113954	0.055527	0.126649	0	41.7541	43.2319	43.2115	39.009	38.6507	40.8079	2.4986	2.58703	2.58581	2.33433	2.31289	2.44198	protein_coding	HGNC:20073	OTTHUMG00000013052.12_5
ENSG00000143436.11_5	MRPL9	0.0282982	0.658137	0.759192	0	47.2599	52.4164	54.0228	51.3369	52.835	52.6064	27.1609	30.1244	31.0476	29.5039	30.365	30.2335	protein_coding	HGNC:14277	OTTHUMG00000013063.5_5
ENSG00000182134.16_4	TDRKH	-0.241426	0.00984462	0.0361502	0	12.6379	13.5262	14.2413	11.1983	11.5622	11.4335	2.48191	2.65637	2.7968	2.19919	2.27066	2.24539	protein_coding	HGNC:11713	OTTHUMG00000013062.5_4
ENSG00000159445.13_3	THEM4	-0.0330879	0.669329	0.767751	0	12.7751	11.6522	12.6104	11.802	11.6654	12.7309	1.84158	1.67972	1.81784	1.70132	1.68162	1.83522	protein_coding	HGNC:17947	OTTHUMG00000013049.3_3
ENSG00000197747.9_3	S100A10	-0.121364	0.1346	0.240134	0	348.787	376.47	399.766	319.648	362.701	351.946	344.651	372.006	395.025	315.858	358.401	347.772	protein_coding	HGNC:10487	OTTHUMG00000013068.3_3
ENSG00000163191.6_3	S100A11	0.31084	0.000888743	0.00695352	0	378.275	357.675	387.424	445.225	490.051	458.213	582.858	551.117	596.956	686.016	755.086	706.029	protein_coding	HGNC:10488	OTTHUMG00000013069.2_3
ENSG00000237975.7_7	FLG-AS1	0.130716	0.305392	0.436918	0	6.97534	8.64639	7.70073	7.38113	9.35298	8.81841	0.465643	0.577195	0.514068	0.492733	0.624364	0.588679	lncRNA	HGNC:27913	OTTHUMG00000012203.6_7
ENSG00000143631.10_2	FLG	1.69851	4.77102e-07	5.43618e-05	1	54.9014	75.0714	70.5845	243.344	201.265	206.493	4.30701	5.88934	5.53734	19.0903	15.7892	16.1993	protein_coding	HGNC:3748	OTTHUMG00000012202.1_2
ENSG00000197956.10_3	S100A6	1.05199	0.0489676	0.115536	0	4.74166	1.61424	1.59731	8.31595	3.92288	4.09498	4.88328	1.66245	1.64502	8.56431	4.04004	4.21729	protein_coding	HGNC:10496	OTTHUMG00000013549.5_3
ENSG00000196154.12_4	S100A4	1.2646	7.3925e-08	1.87181e-05	1	8.85633	8.38662	9.28123	21.1696	22.3191	20.2722	9.36187	8.86535	9.81103	22.3781	23.5932	21.4294	protein_coding	HGNC:10494	OTTHUMG00000013546.4_4
ENSG00000188015.10_4	S100A3	1.35644	2.1176e-06	0.000138493	1	4.80044	3.58101	4.05213	11.0425	10.7776	9.9942	5.70802	4.25804	4.81823	13.1302	12.8152	11.8837	protein_coding	HGNC:10493	OTTHUMG00000013550.3_4
ENSG00000196754.11_3	S100A2	0.780511	6.31265e-06	0.000266543	1	11.9521	10.6688	10.8449	20.1959	19.4286	17.8395	7.62739	6.80844	6.92082	12.8882	12.3986	11.3845	protein_coding	HGNC:10492	OTTHUMG00000035031.4_3
ENSG00000285867.1_2	BX470102.2	0.135669	0.302731	0.433882	0	3.85995	3.26559	3.90081	4.34299	3.65447	4.11526	1.21535	1.02821	1.22821	1.36744	1.15065	1.29574	lncRNA	NA	OTTHUMG00000192833.1_2
ENSG00000188643.11_3	S100A16	0.292376	0.00439896	0.0207905	0	602.191	512.067	530.174	675.169	698.954	639.71	354.022	301.039	311.684	396.925	410.908	376.079	protein_coding	HGNC:20441	OTTHUMG00000013545.5_3
ENSG00000189171.14_3	S100A13	0.492394	6.81382e-05	0.00122264	0	36.7969	32.359	35.3595	51.1226	49.738	46.1598	16.6051	14.6024	15.9564	23.0698	22.445	20.8302	protein_coding	HGNC:10490	OTTHUMG00000036641.4_3
ENSG00000272030.1_7	AL162258.2	0.27009	0.253305	0.380778	0	0.920901	0.742179	0.722995	1.18799	0.76393	0.912249	0.873721	0.704155	0.685953	1.12713	0.724791	0.865511	lncRNA	NA	OTTHUMG00000185745.1_7
ENSG00000160679.13_4	CHTOP	-0.0724858	0.200537	0.320472	0	103.729	111.642	111.476	106.764	102.697	101.381	18.4407	19.8475	19.8179	18.9802	18.2572	18.0233	protein_coding	HGNC:24511	OTTHUMG00000037052.2_4
ENSG00000143553.10_2	SNAPIN	-0.225581	0.00202921	0.0121637	0	71.7323	73.0675	77.2427	61.9704	64.5004	63.452	46.4588	47.3235	50.0277	40.1362	41.7749	41.0959	protein_coding	HGNC:17145	OTTHUMG00000037086.1_2
ENSG00000143621.17_3	ILF2	-0.143639	0.021784	0.0636691	0	346.181	338.601	354.015	308.547	319.096	312.719	153.109	149.757	156.575	136.465	141.13	138.31	protein_coding	HGNC:6037	OTTHUMG00000037087.2_3
ENSG00000143624.14_4	INTS3	0.234763	0.0200897	0.0599751	0	88.4653	90.5644	90.5088	118.254	93.0549	105.841	8.45183	8.65238	8.64707	11.2978	8.89031	10.1119	protein_coding	HGNC:26153	OTTHUMG00000037089.6_4
ENSG00000143554.14_6	SLC27A3	0.570152	0.00826145	0.0320343	0	1.27359	1.39159	1.41236	2.33703	1.67239	2.04749	0.232831	0.254403	0.258201	0.427246	0.305738	0.374313	protein_coding	HGNC:10997	OTTHUMG00000037155.6_6
ENSG00000143614.10_4	GATAD2B	-0.0256554	0.697283	0.789739	0	40.3825	43.2319	39.9833	42.1056	37.6597	41.6391	4.36851	4.67676	4.32532	4.55491	4.07396	4.50445	protein_coding	HGNC:30778	OTTHUMG00000037162.7_4
ENSG00000198837.10_5	DENND4B	0.170734	0.0702441	0.149435	0	71.458	75.5724	76.2003	94.6888	75.7736	80.805	9.39496	9.93589	10.0184	12.4492	9.96234	10.6238	protein_coding	HGNC:29044	OTTHUMG00000037157.5_5
ENSG00000160741.17_4	CRTC2	0.154275	0.0543708	0.124964	0	38.188	39.7437	38.47	47.4418	41.3761	40.7066	10.6019	11.0338	10.6802	13.171	11.487	11.3011	protein_coding	HGNC:27301	OTTHUMG00000037156.5_4
ENSG00000143570.18_5	SLC39A1	0.146031	0.239474	0.366001	0	2.74311	2.65329	2.89198	3.0771	3.22089	2.87865	0.809655	0.783144	0.853595	0.908234	0.950677	0.849661	protein_coding	HGNC:12876	OTTHUMG00000037158.4_5
ENSG00000143578.16_3	CREB3L4	-0.0860564	0.537991	0.657234	0	8.13136	6.38274	6.33881	7.42008	6.29726	5.89921	2.80199	2.19943	2.18429	2.55689	2.16997	2.03281	protein_coding	HGNC:18854	OTTHUMG00000037159.4_3
ENSG00000143543.15_4	JTB	0.0749411	0.211765	0.333818	0	23.1793	22.7478	23.5057	24.013	25.1064	24.0226	15.6405	15.3494	15.8608	16.2031	16.9409	16.2096	protein_coding	HGNC:6201	OTTHUMG00000036590.4_4
ENSG00000285641.1_2	AL358472.6	0.37907	0.160583	0.27367	0	0.979682	0.964833	1.16015	1.86963	1.09428	1.07443	0.574257	0.565553	0.680043	1.09591	0.641429	0.629793	protein_coding	NA	OTTHUMG00000193418.1_2
ENSG00000143545.8_3	RAB13	-0.0235658	0.701572	0.793105	0	79.2563	71.5275	74.1658	74.1814	76.8679	70.2432	28.81	26.0006	26.9596	26.9652	27.9418	25.5337	protein_coding	HGNC:9762	OTTHUMG00000036589.2_3
ENSG00000177954.14_5	RPS27	0.0195714	0.773969	0.848342	0	420.872	437.032	472.452	426.1	465.832	456.631	409.408	425.129	459.583	414.494	453.144	444.194	protein_coding	HGNC:10416	OTTHUMG00000036591.4_5
ENSG00000143549.21_5	TPM3	0.102285	0.0763478	0.159035	0	283.109	275.478	283.263	298.829	309.33	295.548	18.6796	18.1762	18.6898	19.7169	20.4097	19.5004	protein_coding	HGNC:12012	OTTHUMG00000035853.12_5
ENSG00000143612.20_3	C1orf43	-0.0970591	0.223318	0.347217	0	207.046	223.062	236.217	193.136	223.997	205.884	77.5453	83.5438	88.471	72.3357	83.8939	77.1103	protein_coding	HGNC:29876	OTTHUMG00000035981.5_3
ENSG00000143569.19_6	UBAP2L	0.00810094	0.907343	0.941153	0	226.855	260.969	264.128	251.679	251.828	252.713	30.2353	34.7819	35.203	33.5438	33.5637	33.6816	protein_coding	HGNC:29877	OTTHUMG00000035983.6_6
ENSG00000143575.14_6	HAX1	-0.0257071	0.734236	0.818319	0	52.9224	58.4466	60.513	52.5054	60.5569	55.8296	24.558	27.1214	28.0803	24.3644	28.1007	25.907	protein_coding	HGNC:16915	OTTHUMG00000035978.4_6
ENSG00000143515.17_4	ATP8B2	0.0531616	0.315201	0.447208	0	35.0922	35.0123	35.8135	37.2562	36.0079	36.6319	4.60407	4.59358	4.6987	4.88799	4.72421	4.80607	protein_coding	HGNC:13534	OTTHUMG00000035979.6_4
ENSG00000160714.10_3	UBE2Q1	-0.00687049	0.916771	0.947039	0	81.3332	83.2725	89.769	78.6217	86.0557	88.5287	19.4113	19.8741	21.4246	18.7641	20.5383	21.1286	protein_coding	HGNC:15698	OTTHUMG00000037265.3_3
ENSG00000160710.17_7	ADAR	0.0812916	0.172124	0.287321	0	253.326	274.161	268.853	287.65	277.637	277.222	26.3087	28.4724	27.9212	29.8733	28.8334	28.7904	protein_coding	HGNC:225	OTTHUMG00000037261.16_7
ENSG00000143603.19_5	KCNN3	2.32655	1.14009e-06	9.06307e-05	1	0.979682	1.78123	1.5805	7.16691	7.14378	7.5818	0.0720408	0.130982	0.116222	0.527017	0.525316	0.557527	protein_coding	HGNC:6292	OTTHUMG00000037260.4_5
ENSG00000163344.6_3	PMVK	-0.107103	0.199325	0.319093	0	39.7163	44.2339	46.0363	36.9836	42.5942	41.1526	39.6371	44.1456	45.9444	36.9098	42.5092	41.0704	protein_coding	HGNC:9141	OTTHUMG00000037415.2_3
ENSG00000163346.17_4	PBXIP1	-0.301726	0.000594563	0.00533298	0	123.048	125.224	127.836	94.9226	105.257	104.969	31.9522	32.5173	33.1954	24.6488	27.3324	27.2577	protein_coding	HGNC:21199	OTTHUMG00000037369.6_4
ENSG00000163348.4_4	PYGO2	0.0805963	0.133013	0.237962	0	80.0009	80.0811	83.8169	84.5422	88.3474	85.0419	21.8343	21.8562	22.8758	23.0738	24.1123	23.2101	protein_coding	HGNC:30257	OTTHUMG00000037370.2_4
ENSG00000271380.1_6	AL451085.2	0.186827	0.354527	0.488112	0	1.29318	1.07616	1.22741	1.07114	1.5898	1.43933	1.6185	1.34688	1.53618	1.3406	1.98974	1.80141	lncRNA	NA	OTTHUMG00000185142.1_6
ENSG00000160691.18_6	SHC1	0.511251	4.43172e-06	0.000220345	0	149.774	150.514	146.667	218.298	207.066	211.662	34.4942	34.6647	33.7787	50.276	47.6891	48.7476	protein_coding	HGNC:10840	OTTHUMG00000037295.6_6
ENSG00000173207.13_3	CKS1B	-0.210861	0.00480293	0.0220223	0	44.2621	42.9165	43.7832	39.7101	37.3087	36.1251	18.9154	18.3404	18.7108	16.9701	15.9439	15.4381	protein_coding	HGNC:19083	OTTHUMG00000037413.4_3
ENSG00000160688.19_3	FLAD1	0.0803091	0.286438	0.416625	0	37.6982	39.7437	42.3204	39.4375	45.3609	41.8621	9.37999	9.88895	10.5301	9.81275	11.2866	10.416	protein_coding	HGNC:24671	OTTHUMG00000037416.2_3
ENSG00000160685.13_2	ZBTB7B	0.252716	0.00171405	0.0107604	0	28.1365	30.2624	29.4074	34.0623	35.8221	34.7466	6.53881	7.03285	6.83416	7.91594	8.32492	8.07496	protein_coding	HGNC:18668	OTTHUMG00000037414.1_2
ENSG00000143537.13_3	ADAM15	0.320508	0.000473364	0.00458054	0	68.2251	71.0265	75.2419	92.0986	90.8251	84.9608	10.3623	10.7878	11.428	13.9882	13.7948	12.9041	protein_coding	HGNC:193	OTTHUMG00000013898.5_3
ENSG00000243364.8_4	EFNA4	-0.23908	0.0118775	0.0414931	0	11.0116	12.0233	12.0219	9.60132	10.1788	9.93338	8.76025	9.56508	9.56395	7.63828	8.09773	7.90245	protein_coding	HGNC:3224	OTTHUMG00000035309.4_4
ENSG00000143590.14_4	EFNA3	0.0116136	0.943128	0.96263	0	0.999276	1.20604	1.14334	1.14904	1.13557	1.0947	0.514031	0.620392	0.588138	0.591071	0.584142	0.563117	protein_coding	HGNC:3223	OTTHUMG00000035313.2_4
ENSG00000169242.12_3	EFNA1	0.170164	0.058658	0.131728	0	12.7163	10.9843	11.7024	13.6327	13.3584	12.8323	5.87357	5.07356	5.40528	6.29686	6.17018	5.92716	protein_coding	HGNC:3221	OTTHUMG00000035312.3_3
ENSG00000169241.19_4	SLC50A1	0.431091	0.0001025	0.00161835	0	17.8694	17.4598	17.705	22.7861	25.2303	23.4955	7.6365	7.46144	7.56622	9.73764	10.7822	10.0408	protein_coding	HGNC:30657	OTTHUMG00000035333.5_4
ENSG00000179085.7_2	DPM3	0.0287548	0.671461	0.769047	0	15.2243	15.3074	16.0068	15.5413	16.6413	15.3055	24.4763	24.61	25.7343	24.986	26.7545	24.6069	protein_coding	HGNC:3007	OTTHUMG00000035335.1_2
ENSG00000163463.11_3	KRTCAP2	0.298634	0.057664	0.13017	0	6.81859	6.8466	6.22112	9.91292	7.06119	7.46017	1.78217	1.78949	1.62601	2.59094	1.84558	1.94986	protein_coding	HGNC:28942	OTTHUMG00000013904.1_3
ENSG00000163462.18_3	TRIM46	0.434776	0.00338812	0.01737	0	12.3244	12.7284	11.8874	19.5142	14.7211	15.6704	2.71882	2.80794	2.62241	4.30493	3.24755	3.45696	protein_coding	HGNC:19019	OTTHUMG00000035680.3_3
ENSG00000185499.16_5	MUC1	0.551896	0.00362206	0.0182209	0	3.44848	3.54391	3.81674	5.90101	4.31517	5.63567	1.16424	1.19646	1.28857	1.99224	1.45684	1.90266	protein_coding	HGNC:7508	OTTHUMG00000035681.4_5
ENSG00000231064.7_7	AC234582.1	0.268659	0.119539	0.220456	0	11.6386	13.3036	12.2573	18.0731	11.2525	15.4677	4.71964	5.39479	4.97051	7.3289	4.56305	6.27238	lncRNA	NA	OTTHUMG00000035709.2_7
ENSG00000169231.13_3	THBS3	0.795095	1.00442e-05	0.000353954	1	52.3346	63.6975	64.8005	102.849	101.169	109.855	11.3205	13.7784	14.017	22.2472	21.8839	23.7627	protein_coding	HGNC:11787	OTTHUMG00000035710.4_3
ENSG00000173171.14_4	MTX1	0.130938	0.0859038	0.172911	0	15.1263	16.1795	17.066	17.6836	17.3846	17.9206	4.61449	4.93579	5.20623	5.39462	5.30341	5.46694	protein_coding	HGNC:7504	OTTHUMG00000035708.3_4
ENSG00000160766.14_2	GBAP1	0.164829	0.328476	0.460641	0	11.7954	11.8934	10.0042	15.2881	9.58009	12.8526	3.24941	3.27642	2.75599	4.2116	2.63914	3.54065	transcribed_unprocessed_pseudogene	HGNC:4178	OTTHUMG00000176393.4_2
ENSG00000177628.16_4	GBA	0.215595	0.00786739	0.0309556	0	63.3855	63.9016	66.9359	69.332	78.9119	77.3182	17.3754	17.5169	18.3486	19.0055	21.6315	21.1947	protein_coding	HGNC:4177	OTTHUMG00000035841.3_4
ENSG00000160767.21_6	FAM189B	0.499995	0.000112496	0.00172439	0	46.5545	54.4945	54.5609	70.5005	76.9711	72.6556	10.4195	12.1966	12.2115	15.779	17.2272	16.2613	protein_coding	HGNC:1233	OTTHUMG00000035844.4_6
ENSG00000116521.11_3	SCAMP3	0.205182	0.0171003	0.0534307	0	85.4479	98.6727	97.4698	103.083	113.826	107.767	34.991	40.4065	39.9139	42.2124	46.6116	44.1306	protein_coding	HGNC:10565	OTTHUMG00000035874.3_3
ENSG00000176444.19_3	CLK2	0.168143	0.163225	0.276724	0	53.3535	53.5668	52.7114	70.9485	50.2955	58.0799	14.5854	14.6437	14.4099	19.3954	13.7494	15.8775	protein_coding	HGNC:2069	OTTHUMG00000035873.3_3
ENSG00000143630.10_3	HCN3	0.0950301	0.457097	0.58745	0	11.8346	14.7323	13.821	16.2619	12.1609	14.7176	2.79051	3.47377	3.25889	3.83444	2.86747	3.47032	protein_coding	HGNC:19183	OTTHUMG00000035872.3_3
ENSG00000160752.14_2	FDPS	-0.0331936	0.71056	0.80042	0	304.916	350.865	368.593	306.522	356.631	337.978	82.0109	94.3693	99.1374	82.4426	95.9202	90.9032	protein_coding	HGNC:3631	OTTHUMG00000013909.3_2
ENSG00000225855.7_5	RUSC1-AS1	0.340947	0.0476756	0.113211	0	1.2344	1.33592	1.24422	1.46065	1.65174	1.72314	0.351081	0.379955	0.353875	0.415428	0.469778	0.490085	lncRNA	HGNC:26680	OTTHUMG00000013912.3_5
ENSG00000160753.16_4	RUSC1	0.168813	0.0156909	0.0504008	0	55.3521	56.4613	58.8316	66.3134	64.996	60.5328	10.1956	10.3999	10.8365	12.2147	11.972	11.1499	protein_coding	HGNC:17153	OTTHUMG00000013910.6_4
ENSG00000116539.13_5	ASH1L	-0.0335833	0.736679	0.820158	0	54.1568	69.2824	65.4058	64.3658	56.2005	63.9588	4.04729	5.17767	4.88796	4.81024	4.20002	4.77982	protein_coding	HGNC:19088	OTTHUMG00000014011.4_5
ENSG00000235919.4_6	ASH1L-AS1	0.0448347	0.788824	0.859637	0	1.62627	2.0781	1.76545	2.16176	1.75497	1.72314	1.34514	1.71886	1.46026	1.78805	1.45159	1.42526	lncRNA	HGNC:44146	OTTHUMG00000014012.3_6
ENSG00000125459.15_4	MSTO1	0.0366521	0.631595	0.736969	0	14.0682	15.2147	15.7546	16.2424	14.6592	15.3055	3.34321	3.61565	3.74395	3.85988	3.48365	3.63724	protein_coding	HGNC:29678	OTTHUMG00000014014.8_4
ENSG00000163374.19_4	YY1AP1	-0.116464	0.0543243	0.124892	0	54.7251	55.8304	57.6882	51.8043	53.4544	49.9507	10.9428	11.1639	11.5353	10.3588	10.6887	9.98814	protein_coding	HGNC:30935	OTTHUMG00000035437.8_4
ENSG00000132676.16_6	DAP3	0.149776	0.0203095	0.0603678	0	90.2483	92.8466	95.822	99.1682	107.632	102.658	19.6705	20.2368	20.8854	21.6147	23.4594	22.3754	protein_coding	HGNC:2673	OTTHUMG00000035439.6_6
ENSG00000203761.5_5	MSTO2P	0.275362	0.252772	0.380257	0	4.44776	3.63668	3.69904	6.5437	3.42736	4.25716	2.60255	2.12796	2.16445	3.82896	2.00548	2.49103	unprocessed_pseudogene	HGNC:26329	OTTHUMG00000035441.3_5
ENSG00000116580.18_2	GON4L	0.146227	0.0876325	0.175458	0	40.8136	46.646	43.7664	52.1159	44.4937	48.6127	3.41051	3.89788	3.65726	4.35497	3.71804	4.06223	protein_coding	HGNC:25973	OTTHUMG00000014106.4_2
ENSG00000132718.9_3	SYT11	0.00919434	0.863042	0.912565	0	454.044	444.769	443.767	443.608	446.238	461.314	87.6194	85.8297	85.6363	85.6056	86.1131	89.0224	protein_coding	HGNC:19239	OTTHUMG00000014105.2_3
ENSG00000143622.11_3	RIT1	-0.109251	0.169921	0.284723	0	72.0263	80.8975	80.4542	65.9238	74.4315	76.041	17.8371	20.0341	19.9243	16.3259	18.4328	18.8314	protein_coding	HGNC:10023	OTTHUMG00000014104.4_3
ENSG00000132680.11_5	KHDC4	0.121323	0.158963	0.271722	0	46.241	45.4028	43.9009	54.8035	44.3905	48.2073	8.19005	8.04159	7.77558	9.7066	7.86229	8.53831	protein_coding	HGNC:29145	OTTHUMG00000014103.3_5
ENSG00000116584.18_5	ARHGEF2	0.531082	0.000111831	0.00171634	0	96.2244	83.6807	81.463	135.548	119.958	122.099	10.5106	9.14044	8.8982	14.8059	13.103	13.3369	protein_coding	HGNC:682	OTTHUMG00000017464.9_5
ENSG00000163479.14_4	SSR2	-0.0442102	0.547262	0.665071	0	275.448	285.516	307.794	264.377	302.743	275.459	41.4643	42.98	46.3336	39.7978	45.5733	41.466	protein_coding	HGNC:11324	OTTHUMG00000017456.4_4
ENSG00000160803.8_3	UBQLN4	0.146517	0.0162805	0.0516602	0	78.884	83.5879	84.2541	90.638	92.3116	90.1708	20.31	21.5211	21.6926	23.3362	23.7672	23.216	protein_coding	HGNC:1237	OTTHUMG00000017461.3_3
ENSG00000116586.11_2	LAMTOR2	0.134043	0.112615	0.211092	0	40.794	43.3804	47.9362	45.6695	51.7201	47.6397	28.3686	30.1672	33.3353	31.7591	35.9667	33.1291	protein_coding	HGNC:29796	OTTHUMG00000017462.1_2
ENSG00000254726.3_3	MEX3A	-0.461498	3.75566e-05	0.000845982	0	121.951	130.419	133.973	98.4281	92.0432	90.1099	18.5026	19.7875	20.3266	14.9337	13.965	13.6717	protein_coding	HGNC:33482	OTTHUMG00000017465.4_3
ENSG00000160789.20_4	LMNA	0.510771	0.00266257	0.014656	0	515.078	388.252	403.078	699.377	593.161	568.757	73.7406	55.5837	57.7062	100.126	84.9192	81.4255	protein_coding	HGNC:6636	OTTHUMG00000013961.6_4
ENSG00000160785.13_2	SLC25A44	0.231848	0.00113543	0.00813569	0	62.974	62.9368	64.4474	72.1754	75.5052	75.8789	8.63485	8.62975	8.83689	9.89653	10.3531	10.4043	protein_coding	HGNC:29036	OTTHUMG00000014816.2_2
ENSG00000160783.19_5	PMF1	-0.28097	0.0031486	0.0164756	0	27.9601	30.0954	30.9038	23.5846	26.1181	23.536	11.0953	11.9426	12.2634	9.35896	10.3643	9.33969	protein_coding	HGNC:9112	OTTHUMG00000177123.3_5
ENSG00000242252.2_4	BGLAP	0.0781478	0.778281	0.851792	0	1.92018	1.0205	0.975202	1.26589	1.38333	1.4596	1.99189	1.05861	1.01162	1.31317	1.43499	1.51411	protein_coding	HGNC:1043	OTTHUMG00000014819.3_4
ENSG00000160781.17_4	PAQR6	0.25737	0.0106057	0.038131	0	18.9471	19.1482	20.0757	25.1231	20.8532	23.5563	7.486	7.56548	7.93193	9.92616	8.23912	9.30711	protein_coding	HGNC:30132	OTTHUMG00000017490.7_4
ENSG00000198952.8_3	SMG5	0.187032	0.0112607	0.0398468	0	139.35	147.824	148.87	174.187	157.246	164.975	26.2726	27.8702	28.0674	32.8407	29.6466	31.1039	protein_coding	HGNC:24644	OTTHUMG00000017491.4_3
ENSG00000163472.19_4	TMEM79	0.0752993	0.561436	0.677382	0	5.64297	5.43646	4.82557	6.38789	4.91393	5.43295	1.86114	1.79303	1.59155	2.10683	1.62069	1.79187	protein_coding	HGNC:28196	OTTHUMG00000019788.3_4
ENSG00000163468.15_3	CCT3	-0.0270362	0.697782	0.790099	0	327.194	359.549	373.94	334.8	363.465	342.762	84.6776	93.0509	96.7752	86.6459	94.0645	88.7066	protein_coding	HGNC:1616	OTTHUMG00000024061.8_3
ENSG00000116604.18_5	MEF2D	0.081775	0.153069	0.264624	0	38.5015	37.7584	38.0161	41.9498	39.1669	39.8146	6.06228	5.94526	5.98584	6.60522	6.16704	6.26903	protein_coding	HGNC:6997	OTTHUMG00000033095.9_5
ENSG00000183856.11_3	IQGAP3	-0.176254	0.191543	0.309424	0	57.8013	58.1683	55.4184	61.0356	41.0044	49.5858	8.57331	8.62775	8.21987	9.05303	6.08194	7.35476	protein_coding	HGNC:20669	OTTHUMG00000033114.4_3
ENSG00000163382.12_4	NAXE	-0.0687391	0.440037	0.571651	0	72.3397	78.5782	85.9859	68.183	81.8024	75.9599	37.4236	40.6509	44.4831	35.2731	42.3189	39.2964	protein_coding	HGNC:18453	OTTHUMG00000033206.2_4
ENSG00000160818.16_3	GPATCH4	0.226563	0.017267	0.0537304	0	41.9304	46.5717	51.299	52.6417	56.2211	54.7755	9.45017	10.4962	11.5616	11.8643	12.671	12.3452	protein_coding	HGNC:25982	OTTHUMG00000033203.4_3
ENSG00000272068.1_6	AL365181.2	0.249332	0.250529	0.377957	0	1.92018	1.78123	1.84952	2.66811	1.54851	2.37185	0.595958	0.552834	0.574029	0.828093	0.480604	0.736141	lncRNA	NA	OTTHUMG00000185553.1_6
ENSG00000132692.19_6	BCAN	1.36787	5.2408e-06	0.000237276	1	1.15603	1.35448	1.42918	3.40818	3.40671	3.38546	0.242608	0.284255	0.299932	0.715252	0.714945	0.710484	protein_coding	HGNC:23059	OTTHUMG00000033322.4_6
ENSG00000272405.1_6	AL365181.3	-0.0340964	0.707042	0.798034	0	13.5196	12.3202	12.2068	13.5548	11.3351	12.2444	4.19603	3.82377	3.78859	4.20695	3.51802	3.80025	lncRNA	NA	OTTHUMG00000185554.1_6
ENSG00000229953.1_6	AL590666.2	-0.0501713	0.72043	0.807811	0	3.68361	3.20992	3.93444	3.91453	3.07637	3.46655	4.85964	4.23473	5.19055	5.16429	4.05853	4.57328	lncRNA	NA	OTTHUMG00000033321.1_6
ENSG00000132688.11_3	NES	0.467374	0.00189479	0.0115658	0	1925.33	2392.28	2452.35	3264.31	2852.95	3242.88	345.785	429.649	440.436	586.263	512.383	582.414	protein_coding	HGNC:7756	OTTHUMG00000034299.3_3
ENSG00000143320.9_3	CRABP2	0.0845598	0.537951	0.657234	0	1.78302	1.89256	1.91678	2.06438	2.04403	1.8245	1.64789	1.74913	1.77151	1.90793	1.88912	1.68623	protein_coding	HGNC:2339	OTTHUMG00000041300.4_3
ENSG00000143319.16_2	ISG20L2	0.0830928	0.253096	0.380659	0	43.0864	47.7221	49.4158	48.8635	52.195	47.518	8.18822	9.0692	9.39108	9.28611	9.91923	9.03041	protein_coding	HGNC:25745	OTTHUMG00000041301.3_2
ENSG00000143303.12_6	RRNAD1	0.202666	0.0264158	0.0736358	0	16.2431	15.0291	16.4607	19.7285	17.1781	18.022	5.12563	4.74255	5.1943	6.22545	5.42067	5.68696	protein_coding	HGNC:24273	OTTHUMG00000041302.10_6
ENSG00000143314.12_4	MRPL24	0.195247	0.0143454	0.0474812	0	45.4965	49.0024	49.8362	52.6028	58.7607	53.9241	26.8416	28.91	29.4019	31.0341	34.6671	31.8136	protein_coding	HGNC:14037	OTTHUMG00000041296.3_4
ENSG00000143321.19_3	HDGF	-0.242958	0.00585515	0.0253828	0	461.313	491.786	517.883	396.77	436.555	409.701	125.561	133.856	140.959	107.994	118.823	111.514	protein_coding	HGNC:4856	OTTHUMG00000041295.2_3
ENSG00000143294.15_3	PRCC	-0.0814348	0.170643	0.285582	0	92.1489	94.665	97.8901	87.3272	94.6654	87.1097	22.6355	23.2535	24.0457	21.451	23.2536	21.3976	protein_coding	HGNC:9343	OTTHUMG00000041294.5_3
ENSG00000132694.18_2	ARHGEF11	0.056803	0.417433	0.548963	0	66.2265	61.0999	62.0598	71.2796	62.2087	63.4723	7.39961	6.8268	6.93406	7.9642	6.95069	7.09187	protein_coding	HGNC:14580	OTTHUMG00000041292.1_2
ENSG00000117036.12_3	ETV3	0.183383	0.0418813	0.102882	0	23.8651	22.989	21.9757	28.4923	23.9709	25.6646	3.55823	3.42761	3.27653	4.24815	3.57401	3.82654	protein_coding	HGNC:3492	OTTHUMG00000034298.3_3
ENSG00000183853.18_7	KIRREL1	-0.0989817	0.27464	0.404331	0	252.758	303.273	311.493	257.658	270.08	282.311	32.1085	38.5255	39.5697	32.731	34.309	35.8626	protein_coding	HGNC:15734	OTTHUMG00000022438.6_7
ENSG00000163565.18_5	IFI16	-0.381467	0.00205565	0.0122738	0	152.654	121.921	123.851	100.122	104.617	101.077	28.8353	23.0301	23.3945	18.9124	19.7614	19.0928	protein_coding	HGNC:5395	OTTHUMG00000037108.6_5
ENSG00000158716.8_2	DUSP23	1.32435	3.12174e-05	0.000751151	1	1.25399	1.00194	1.0929	2.41494	3.15895	2.81784	1.51999	1.21448	1.32473	2.92719	3.82903	3.41556	protein_coding	HGNC:21480	OTTHUMG00000022795.2_2
ENSG00000272668.2_7	AL590560.2	1.1567	0.000665826	0.00574738	1	0.352686	0.463862	0.420346	1.05167	0.76393	0.952794	0.0494373	0.0650213	0.0589215	0.147416	0.107083	0.133557	lncRNA	NA	OTTHUMG00000192504.1_7
ENSG00000213085.10_6	CFAP45	0.018178	0.904784	0.939872	0	2.27286	1.98533	2.60614	2.39546	2.43632	2.12858	0.865193	0.75574	0.992061	0.911862	0.927414	0.810271	protein_coding	HGNC:17229	OTTHUMG00000035432.5_6
ENSG00000158710.14_2	TAGLN2	0.153924	0.0354158	0.091009	0	818.368	769.009	805.836	892.299	925.222	845.148	329.058	309.211	324.019	358.785	372.023	339.826	protein_coding	HGNC:11554	OTTHUMG00000022793.3_2
ENSG00000085552.17_3	IGSF9	-0.626702	0.00588137	0.0254642	-1	1.80262	2.15232	1.6982	1.40222	1.07363	1.17579	0.271601	0.324291	0.255868	0.211273	0.161765	0.177157	protein_coding	HGNC:18132	OTTHUMG00000022794.3_3
ENSG00000177807.10_7	KCNJ10	-0.387521	0.000641897	0.00561886	0	19.7112	21.8572	21.5049	15.0349	16.2077	16.9881	3.15278	3.49603	3.43968	2.40482	2.5924	2.71723	protein_coding	HGNC:6256	OTTHUMG00000024073.5_7
ENSG00000143315.7_4	PIGM	-0.133907	0.0486429	0.114949	0	26.0008	26.0505	24.3632	23.0393	23.7644	22.8265	3.69382	3.70088	3.46118	3.27309	3.37611	3.24286	protein_coding	HGNC:18858	OTTHUMG00000024081.3_4
ENSG00000162728.5_3	KCNJ9	-0.0397282	0.812178	0.876113	0	1.29318	1.35448	1.36192	1.26589	1.13557	1.50014	0.307754	0.322341	0.324112	0.30126	0.270245	0.357007	protein_coding	HGNC:6270	OTTHUMG00000024072.2_3
ENSG00000162729.14_5	IGSF8	-0.153848	0.0750174	0.156812	0	67.6569	79.5616	81.9338	66.6834	70.7771	68.5606	26.1022	30.6951	31.6103	25.7266	27.306	26.4508	protein_coding	HGNC:17813	OTTHUMG00000024075.6_5
ENSG00000162734.12_3	PEA15	0.069055	0.446181	0.577229	0	851.795	960.491	993.378	894.286	1064.69	984.297	303.562	342.299	354.019	318.705	379.434	350.783	protein_coding	HGNC:8822	OTTHUMG00000031605.1_3
ENSG00000132716.18_5	DCAF8	0.0826801	0.478102	0.605063	0	46.2802	42.8608	42.4549	53.7907	38.3617	47.1531	6.09993	5.64925	5.59575	7.08986	5.05624	6.21499	protein_coding	HGNC:24891	OTTHUMG00000031604.9_5
ENSG00000162735.18_3	PEX19	-0.201048	0.0102216	0.0371208	0	57.331	62.139	64.8341	51.5121	54.0119	54.8363	12.8516	13.9294	14.5335	11.5472	12.1076	12.2924	protein_coding	HGNC:9713	OTTHUMG00000033112.4_3
ENSG00000122218.16_4	COPA	0.220595	0.00325667	0.0168541	0	214.531	231.003	230.803	262.079	257.878	268.14	27.9046	30.0473	30.0213	34.0894	33.5429	34.8778	protein_coding	HGNC:2230	OTTHUMG00000033111.9_4
ENSG00000162736.17_5	NCSTN	-0.00144515	0.980732	0.987594	0	180.693	188.959	194.317	177.206	194.513	191.714	43.7406	45.7417	47.0388	42.8965	47.0862	46.4087	protein_coding	HGNC:17091	OTTHUMG00000033110.6_5
ENSG00000162738.6_3	VANGL2	-0.588574	9.35377e-05	0.00152436	-1	122.264	151.386	151.879	95.9937	92.7865	94.2252	22.8361	28.2753	28.3674	17.9293	17.3303	17.599	protein_coding	HGNC:15511	OTTHUMG00000033122.2_3
ENSG00000213080.3_5	AL354714.2	-0.651472	9.72773e-05	0.00156217	-1	13.0102	12.4129	13.5015	7.63431	9.29104	7.86561	11.8598	11.3154	12.3077	6.95926	8.4695	7.17011	processed_pseudogene	NA	OTTHUMG00000028599.1_5
ENSG00000158769.18_4	F11R	0.829413	0.000569404	0.0052026	1	2.29246	1.70701	1.73182	3.155	3.34477	3.66927	0.452965	0.337288	0.34219	0.623394	0.660892	0.725009	protein_coding	HGNC:14685	OTTHUMG00000028602.4_4
ENSG00000158773.14_4	USF1	-0.0962005	0.0961168	0.187663	0	54.1177	51.7113	53.1653	51.2395	48.045	49.4439	23.1668	22.1367	22.7591	21.9347	20.5672	21.1661	protein_coding	HGNC:12593	OTTHUMG00000031472.3_4
ENSG00000162755.14_4	KLHDC9	0.00978707	0.934501	0.957163	0	3.50726	3.33981	3.161	3.155	3.65447	3.26382	2.03911	1.94175	1.83779	1.8343	2.12469	1.89757	protein_coding	HGNC:28489	OTTHUMG00000031479.3_4
ENSG00000143256.5_3	PFDN2	-0.023435	0.737399	0.820646	0	40.8332	45.1802	46.5407	41.5213	45.8564	43.0784	65.7539	72.7539	74.9447	66.862	73.8429	69.3695	protein_coding	HGNC:8867	OTTHUMG00000031481.2_3
ENSG00000158793.14_4	NIT1	-0.0761224	0.156306	0.268827	0	38.1292	37.6841	37.394	35.9319	35.3059	36.1453	10.0499	9.93256	9.85608	9.47072	9.30573	9.52697	protein_coding	HGNC:7828	OTTHUMG00000031473.3_4
ENSG00000158796.17_4	DEDD	0.0406822	0.48656	0.612084	0	53.4123	55.3109	56.9316	58.5038	58.1	53.8024	18.9338	19.6068	20.1814	20.7387	20.5955	19.0721	protein_coding	HGNC:2755	OTTHUMG00000033104.7_4
ENSG00000143222.12_3	UFC1	-0.085337	0.18141	0.298092	0	87.8579	86.7236	92.8292	78.797	88.0997	85.1838	41.8371	41.297	44.2044	37.5224	41.9522	40.5637	protein_coding	HGNC:26941	OTTHUMG00000033155.2_3
ENSG00000143258.16_4	USP21	0.0881928	0.301739	0.432714	0	36.4246	34.5113	34.8887	42.164	34.5627	35.7399	9.6771	9.16879	9.26905	11.2019	9.18243	9.49519	protein_coding	HGNC:12620	OTTHUMG00000033154.7_4
ENSG00000143224.18_4	PPOX	0.158388	0.0818329	0.1669	0	18.6336	19.1482	18.7306	22.9419	18.7885	21.3264	3.94361	4.05253	3.96415	4.85543	3.97641	4.51351	protein_coding	HGNC:9280	OTTHUMG00000034342.4_4
ENSG00000158850.15_3	B4GALT3	-0.156976	0.0178195	0.0548662	0	54.6271	58.5765	59.6723	52.0769	51.9679	51.0251	14.043	15.0582	15.3399	13.3874	13.3594	13.117	protein_coding	HGNC:926	OTTHUMG00000034348.2_3
ENSG00000158859.10_3	ADAMTS4	0.142993	0.64353	0.74707	0	0.920901	0.723625	0.958388	1.05167	1.2801	0.547349	0.0890793	0.0699966	0.0927054	0.101728	0.123825	0.0529454	protein_coding	HGNC:220	OTTHUMG00000034349.3_3
ENSG00000158864.12_3	NDUFS2	-0.0470345	0.3781	0.511959	0	133.785	134.78	139.723	127.193	136.289	131.729	36.5734	36.8452	38.1965	34.7712	37.2578	36.0111	protein_coding	HGNC:7708	OTTHUMG00000034344.1_3
ENSG00000158882.15_4	TOMM40L	-0.0439905	0.559166	0.675515	0	25.7656	26.7556	29.2224	24.831	27.997	26.4958	7.82912	8.12992	8.8795	7.54512	8.50714	8.05098	protein_coding	HGNC:25756	OTTHUMG00000034345.2_4
ENSG00000143252.14_2	SDHC	0.00932894	0.862947	0.912556	0	81.7643	87.7812	87.9195	83.6853	87.0054	88.4679	5.77431	6.19924	6.20901	5.90998	6.14445	6.24773	protein_coding	HGNC:10682	OTTHUMG00000034468.5_2
ENSG00000081721.11_2	DUSP12	-0.0755123	0.200285	0.320218	0	31.1735	31.6168	30.4667	30.362	29.6074	28.523	17.6921	17.9437	17.291	17.2315	16.8033	16.1878	protein_coding	HGNC:3067	OTTHUMG00000034540.2_2
ENSG00000118217.6_4	ATF6	-0.0256504	0.625899	0.732718	0	99.3986	95.5927	93.5858	92.4297	92.9104	98.1377	12.6397	12.1557	11.9005	11.7535	11.8146	12.4794	protein_coding	HGNC:791	OTTHUMG00000023961.3_4
ENSG00000162745.10_5	OLFML2B	0.789811	1.08396e-05	0.000373223	1	42.4007	34.9937	34.048	62.8662	66.0902	63.6344	12.416	10.2471	9.97013	18.4089	19.3529	18.6338	protein_coding	HGNC:24558	OTTHUMG00000024047.2_5
ENSG00000198929.13_6	NOS1AP	-0.0311357	0.796634	0.865367	0	6.13281	8.20108	7.02818	7.26428	6.91666	6.73037	0.780852	1.04419	0.894854	0.924915	0.880655	0.856935	protein_coding	HGNC:16859	OTTHUMG00000024049.7_6
ENSG00000239887.6_6	C1orf226	-0.149794	0.136466	0.242734	0	20.3774	25.2898	25.473	21.7928	20.7706	21.5899	4.72465	5.86361	5.90609	5.05283	4.81582	5.00577	protein_coding	HGNC:34351	OTTHUMG00000031376.5_6
ENSG00000152332.16_3	UHMK1	-0.0399695	0.718667	0.806826	0	95.2251	82.0108	68.4323	80.8614	76.0626	81.9402	10.2968	8.86795	7.39968	8.74366	8.22477	8.86032	protein_coding	HGNC:19683	OTTHUMG00000031373.2_3
ENSG00000117143.13_5	UAP1	0.257347	0.00546965	0.0241685	0	41.5385	44.9761	46.0531	48.5714	55.3952	54.5322	12.0857	13.0858	13.3992	14.1319	16.1173	15.8662	protein_coding	HGNC:12457	OTTHUMG00000034419.4_5
ENSG00000162733.18_4	DDR2	1.83898	5.11485e-06	0.000233045	1	1.48912	1.91111	1.61413	4.63512	6.79278	6.54792	0.138703	0.17801	0.150347	0.431736	0.632711	0.609903	protein_coding	HGNC:2731	OTTHUMG00000034423.8_4
ENSG00000132196.14_5	HSD17B7	-0.20499	0.0267415	0.0742258	0	26.4906	31.4684	30.8197	26.5838	25.4574	24.9956	5.54429	6.5861	6.45035	5.56379	5.32805	5.2314	protein_coding	HGNC:5215	OTTHUMG00000034420.8_5
ENSG00000117152.13_4	RGS4	2.2267	0.00012107	0.0018211	1	5.79972	2.4863	2.37075	21.2086	13.9366	14.3527	1.19928	0.514123	0.49023	4.38556	2.88184	2.96789	protein_coding	HGNC:10000	OTTHUMG00000034417.5_4
ENSG00000143248.13_5	RGS5	-0.165992	0.503428	0.627115	0	0.940495	1.68846	1.36192	1.12957	1.40398	1.03388	0.141983	0.2549	0.205604	0.170526	0.211953	0.156081	protein_coding	HGNC:10001	OTTHUMG00000034441.6_5
ENSG00000143228.13_5	NUF2	-0.438549	0.00102644	0.00761919	0	42.7337	36.4596	34.0984	29.4661	26.6343	27.4486	12.7108	10.8446	10.1423	8.76446	7.92216	8.16436	protein_coding	HGNC:14621	OTTHUMG00000034275.4_5
ENSG00000185630.18_5	PBX1	-0.366168	0.0294768	0.0797459	0	49.5523	67.1301	68.5668	40.5475	49.5522	53.7011	2.33198	3.15921	3.22682	1.90821	2.33198	2.52723	protein_coding	HGNC:8632	OTTHUMG00000034307.13_5
ENSG00000143198.13_3	MGST3	0.150676	0.0199767	0.0597423	0	56.4297	56.183	57.7219	59.867	64.8927	64.344	7.00816	6.97752	7.16864	7.43505	8.05921	7.99105	protein_coding	HGNC:7064	OTTHUMG00000034627.7_3
ENSG00000143149.12_2	ALDH9A1	0.0677294	0.248236	0.375291	0	77.2578	71.4162	73.2242	74.1229	78.7261	79.7103	23.3548	21.5889	22.1355	22.4072	23.7987	24.0962	protein_coding	HGNC:412	OTTHUMG00000034677.2_2
ENSG00000143183.16_3	TMCO1	-0.113947	0.0642975	0.14082	0	96.6751	93.6259	91.2823	82.2636	89.483	88.4476	17.3129	16.7668	16.3471	14.732	16.0249	15.8395	protein_coding	HGNC:18188	OTTHUMG00000034672.4_3
ENSG00000143179.16_5	UCK2	0.415814	3.66021e-05	0.000834249	0	28.1169	28.4811	29.1047	39.2817	37.4326	37.6252	4.0259	4.07805	4.16735	5.62452	5.35976	5.38734	protein_coding	HGNC:12562	OTTHUMG00000040117.4_5
ENSG00000215835.2_5	AL596087.1	-0.790648	0.00373692	0.0185867	-1	0.960089	1.16893	0.941574	0.545308	0.536816	0.689255	0.487602	0.593668	0.478199	0.276947	0.272634	0.350053	processed_pseudogene	NA	OTTHUMG00000034702.1_5
ENSG00000143157.11_2	POGK	0.105264	0.109111	0.206142	0	102.416	116.392	113.208	120.494	118.327	118.349	12.1231	13.7775	13.4005	14.263	14.0065	14.0091	protein_coding	HGNC:18800	OTTHUMG00000034325.2_2
ENSG00000152382.6_3	TADA1	-0.0474688	0.448023	0.578891	0	19.6328	20.1873	19.8571	20.0985	18.8505	18.7923	6.76994	6.96113	6.84729	6.93052	6.50017	6.48011	protein_coding	HGNC:30631	OTTHUMG00000034321.2_3
ENSG00000143195.13_5	ILDR2	-0.028309	0.788772	0.859637	0	90.5422	116.504	115.124	113.872	97.3288	104.746	6.49235	8.35391	8.255	8.16521	6.97897	7.51086	protein_coding	HGNC:18131	OTTHUMG00000034320.7_5
ENSG00000143190.23_7	POU2F1	0.00107613	0.992537	0.995012	0	18.9471	19.074	16.8306	20.8386	15.3612	18.6504	1.1819	1.18982	1.04988	1.29989	0.958217	1.1634	protein_coding	HGNC:9212	OTTHUMG00000034436.12_7
ENSG00000143162.9_4	CREG1	-0.234417	0.0981089	0.190519	0	14.5581	14.0643	13.1652	9.42604	12.8423	13.258	4.43033	4.28007	4.00646	2.86855	3.90818	4.0347	protein_coding	HGNC:2351	OTTHUMG00000034682.4_4
ENSG00000197965.12_5	MPZL1	0.145961	0.014786	0.0483861	0	176.225	175.952	174.006	189.339	195.132	197.735	24.9293	24.8907	24.6154	26.7844	27.604	27.9721	protein_coding	HGNC:7226	OTTHUMG00000034571.5_5
ENSG00000143158.11_3	MPC2	0.0406613	0.560184	0.676496	0	47.8673	42.8052	44.4558	43.1962	47.1365	48.6533	18.1453	16.2264	16.8521	16.3746	17.8683	18.4432	protein_coding	HGNC:24515	OTTHUMG00000034570.4_3
ENSG00000143164.15_3	DCAF6	-0.145156	0.0392318	0.0979755	0	60.3876	55.0882	58.0245	49.8178	54.7758	52.3023	9.57622	8.73585	9.20148	7.90006	8.6863	8.29405	protein_coding	HGNC:30002	OTTHUMG00000034572.6_3
ENSG00000143147.14_3	GPR161	-0.200533	0.00625513	0.026594	0	101.044	99.1922	100.009	92.8971	83.1238	85.2446	9.00253	8.83751	8.91025	8.27665	7.4059	7.59485	protein_coding	HGNC:23694	OTTHUMG00000034651.4_3
ENSG00000143155.13_3	TIPRL	-0.191862	0.0471472	0.112335	0	63.8753	55.7377	50.8114	48.5714	51.1833	49.4034	20.0487	17.4946	15.9483	15.2453	16.0651	15.5064	protein_coding	HGNC:30231	OTTHUMG00000034646.3_3
ENSG00000213064.10_3	SFT2D2	-0.323408	0.00212562	0.0125653	0	44.6343	45.6997	42.1691	34.7829	32.3948	38.6996	3.97917	4.07414	3.75939	3.10091	2.888	3.45009	protein_coding	HGNC:25140	OTTHUMG00000034650.4_3
ENSG00000143178.13_4	TBX19	0.0603474	0.628018	0.734487	0	2.31205	2.39353	2.32031	2.33703	2.41567	2.57457	0.606837	0.628223	0.609005	0.613395	0.634034	0.67574	protein_coding	HGNC:11596	OTTHUMG00000034648.3_4
ENSG00000143153.12_3	ATP1B1	-0.498664	0.000211358	0.00263676	0	14.3034	14.6209	14.7962	9.32866	10.9015	10.724	4.82895	4.93617	4.99533	3.14945	3.68045	3.62053	protein_coding	HGNC:804	OTTHUMG00000034590.3_3
ENSG00000143156.14_5	NME7	-0.0855874	0.169521	0.284191	0	25.4913	25.4567	25.557	23.6625	25.1271	23.313	4.45809	4.45204	4.46957	4.13824	4.39439	4.07713	protein_coding	HGNC:20461	OTTHUMG00000034586.5_5
ENSG00000117475.14_3	BLZF1	0.0162079	0.820312	0.882464	0	21.2591	19.1668	18.8147	20.3906	19.2428	20.2519	5.56521	5.01748	4.92531	5.33786	5.03737	5.30155	protein_coding	HGNC:1065	OTTHUMG00000035453.3_3
ENSG00000117477.12_3	CCDC181	-0.161791	0.257825	0.385948	0	4.95719	4.28608	4.96008	3.83663	4.95522	3.91254	1.2515	1.08207	1.25223	0.968602	1.251	0.987764	protein_coding	HGNC:28051	OTTHUMG00000035448.4_3
ENSG00000117479.15_6	SLC19A2	-0.676098	9.70362e-05	0.00156091	-1	12.3048	12.3758	11.2148	7.67326	6.62761	8.14943	2.81962	2.83589	2.56985	1.75831	1.5187	1.86742	protein_coding	HGNC:10938	OTTHUMG00000035452.5_6
ENSG00000213062.5_6	Z99572.1	-0.468731	0.0378172	0.0954541	0	1.07765	1.05761	1.31148	0.798487	0.722636	0.973066	0.0763912	0.0749703	0.0929665	0.0566022	0.0512254	0.0689775	lncRNA	NA	OTTHUMG00000186558.2_6
ENSG00000000460.17_6	C1orf112	-0.0195136	0.888471	0.928822	0	17.0661	13.4149	13.0307	16.515	12.3261	14.0284	2.85864	2.24705	2.1827	2.76634	2.06468	2.34981	protein_coding	HGNC:25565	OTTHUMG00000035821.9_6
ENSG00000188404.9_3	SELL	0.220122	0.443078	0.57451	0	2.11611	1.13182	1.00883	1.77225	1.5898	1.56096	0.77485	0.414435	0.369399	0.648939	0.582131	0.571571	protein_coding	HGNC:10720	OTTHUMG00000034809.4_3
ENSG00000171806.12_4	METTL18	-0.316289	0.035258	0.0908539	0	6.38753	5.00971	4.99371	4.63512	4.23258	4.27743	4.05557	3.18077	3.17061	2.94293	2.68735	2.71583	protein_coding	HGNC:28793	OTTHUMG00000035813.3_4
ENSG00000000457.14_4	SCYL3	-0.0726841	0.526145	0.646999	0	10.561	9.3329	9.16354	9.52342	7.949	10.1361	1.53436	1.35594	1.33133	1.38361	1.15487	1.47263	protein_coding	HGNC:19285	OTTHUMG00000035941.6_4
ENSG00000075945.13_3	KIFAP3	-0.0820127	0.258674	0.386941	0	159.61	138.509	141.657	131.672	142.607	141.176	32.063	27.8243	28.4565	26.4509	28.6475	28.3599	protein_coding	HGNC:17060	OTTHUMG00000035947.3_3
ENSG00000120370.12_4	GORAB	-0.117317	0.419867	0.55158	0	13.3041	9.87098	10.7272	12.0942	9.2291	9.89283	3.52613	2.61622	2.84315	3.20545	2.44609	2.62201	protein_coding	HGNC:25676	OTTHUMG00000035228.2_4
ENSG00000116132.12_4	PRRX1	0.0810327	0.536683	0.656122	0	21.5922	16.7176	14.8802	18.8716	18.0453	19.2789	2.61787	2.02687	1.8041	2.28802	2.18783	2.3374	protein_coding	HGNC:9142	OTTHUMG00000035231.7_4
ENSG00000117523.16_5	PRRC2C	0.0752531	0.500694	0.624862	0	131.885	174.857	165.7	172.512	150.825	174.442	9.30536	12.3374	11.6913	12.1719	10.6417	12.3081	protein_coding	HGNC:24903	OTTHUMG00000034665.10_5
ENSG00000117533.15_3	VAMP4	-0.331585	0.0788309	0.163015	0	20.3774	15.7156	12.7449	14.548	11.3557	12.8323	4.08692	3.15195	2.55613	2.91778	2.27752	2.57367	protein_coding	HGNC:12645	OTTHUMG00000034788.5_3
ENSG00000010165.20_4	EEF1AKNMT	0.146274	0.0264604	0.0737212	0	50.6888	53.2514	56.0405	59.088	59.6898	58.3029	13.2312	13.9001	14.6282	15.4237	15.5807	15.2187	protein_coding	HGNC:24248	OTTHUMG00000034912.7_4
ENSG00000197959.14_5	DNM3	-0.230096	0.0518489	0.120607	0	20.8085	27.6091	23.7075	21.5591	20.2751	19.664	1.83674	2.43703	2.09264	1.903	1.78966	1.73573	protein_coding	HGNC:29125	OTTHUMG00000034913.5_5
ENSG00000135845.10_3	PIGC	-0.0181356	0.733781	0.818218	0	32.4471	33.0826	32.7702	31.7447	33.2619	32.0706	6.20997	6.33161	6.2718	6.07554	6.36592	6.13792	protein_coding	HGNC:8960	OTTHUMG00000034751.3_3
ENSG00000094975.14_4	SUCO	-0.519864	6.11943e-05	0.00115249	0	146.208	139.363	126.272	95.0005	90.5154	101.685	18.5214	17.6543	15.9959	12.0345	11.4663	12.8813	protein_coding	HGNC:1240	OTTHUMG00000034839.5_4
ENSG00000120337.8_2	TNFSF18	6.352	8.59826e-05	0.00143371	1	0.0391873	0	0	0.467407	1.75497	1.35824	0.0195156	0	0	0.232772	0.873991	0.676413	protein_coding	HGNC:11932	OTTHUMG00000034835.2_2
ENSG00000117586.11_4	TNFSF4	0.441806	0.0710913	0.150773	0	1.07765	1.16893	1.17697	1.16852	1.48657	2.00695	0.271928	0.294961	0.296989	0.294857	0.375111	0.506421	protein_coding	HGNC:11934	OTTHUMG00000034838.3_4
ENSG00000203739.4_6	AL645568.1	0.176884	0.286031	0.416156	0	1.41074	1.24315	1.14334	1.48012	1.46592	1.33797	0.294089	0.259152	0.238345	0.308552	0.305591	0.278917	lncRNA	NA	OTTHUMG00000034807.9_6
ENSG00000117592.9_3	PRDX6	0.286456	0.00693548	0.0284686	0	328.017	352.776	353.275	372.64	452.659	435.933	141.937	152.651	152.867	161.246	195.872	188.634	protein_coding	HGNC:16753	OTTHUMG00000034804.2_3
ENSG00000183831.6_3	ANKRD45	-0.379611	0.0749074	0.156655	0	1.44993	1.09471	1.16015	0.817962	1.01169	1.01361	0.498087	0.376061	0.398541	0.28099	0.347541	0.3482	protein_coding	HGNC:24786	OTTHUMG00000040546.3_3
ENSG00000076321.11_4	KLHL20	-0.201682	0.00725221	0.0293784	0	28.8027	29.9469	28.5835	24.5194	25.0858	26.3336	6.78668	7.0563	6.73504	5.77742	5.91089	6.2049	protein_coding	HGNC:25056	OTTHUMG00000040548.2_4
ENSG00000120334.15_2	CENPL	-0.150377	0.107318	0.203629	0	15.6749	13.5262	13.1484	13.0095	12.6152	12.5079	3.18985	2.75259	2.6757	2.64743	2.56719	2.54537	protein_coding	HGNC:17879	OTTHUMG00000034802.1_2
ENSG00000117593.12_5	DARS2	-0.159617	0.014954	0.0486591	0	42.9493	39.9478	40.6727	36.9057	36.9577	36.7535	5.84105	5.43286	5.53144	5.01913	5.0262	4.99844	protein_coding	HGNC:25538	OTTHUMG00000034803.10_5
ENSG00000234741.8_7	GAS5	0.346783	8.46327e-05	0.00142191	0	126.203	127.543	121.968	156.834	156.977	163.982	26.0642	26.3411	25.1895	32.3904	32.4199	33.8666	lncRNA	HGNC:16355	OTTHUMG00000037216.7_7
ENSG00000185278.15_4	ZBTB37	-0.0641046	0.628821	0.734754	0	10.9333	10.743	8.74319	10.8867	8.23805	9.93338	0.561717	0.551944	0.449198	0.559324	0.423246	0.510346	protein_coding	HGNC:28365	OTTHUMG00000037274.5_4
ENSG00000135870.11_6	RC3H1	-0.162971	0.104228	0.199093	0	16.008	16.3651	13.7201	14.3922	12.7184	14.0284	1.39103	1.42206	1.19222	1.25063	1.10518	1.21901	protein_coding	HGNC:29434	OTTHUMG00000037275.4_6
ENSG00000152061.23_4	RABGAP1L	0.180625	0.0264431	0.0736969	0	12.4028	11.5594	12.1228	13.399	14.0191	13.481	0.771749	0.719273	0.754326	0.833738	0.872326	0.838841	protein_coding	HGNC:24663	OTTHUMG00000034899.9_4
ENSG00000116161.17_2	CACYBP	-0.190968	0.00401643	0.0194809	0	75.1612	70.8596	73.8632	63.1389	65.0992	64.3845	16.6655	15.7117	16.3776	13.9998	14.4344	14.2759	protein_coding	HGNC:30423	OTTHUMG00000034941.7_2
ENSG00000120333.4_3	MRPS14	-0.136536	0.0320575	0.084749	0	33.2504	32.4147	32.5852	29.0182	30.7637	29.5974	12.8182	12.496	12.5618	11.1867	11.8595	11.41	protein_coding	HGNC:14049	OTTHUMG00000034878.4_3
ENSG00000235750.10_3	KIAA0040	0.546937	0.0658139	0.142996	0	9.03267	5.30658	5.06096	12.4642	8.23805	7.54126	1.89483	1.11319	1.06167	2.61468	1.72814	1.58197	protein_coding	HGNC:28950	OTTHUMG00000034880.6_3
ENSG00000143207.21_7	COP1	-0.205114	0.00517167	0.0231995	0	46.0059	42.5269	44.254	37.2173	39.2701	38.6996	11.0141	10.1812	10.5947	8.91005	9.40151	9.26494	protein_coding	HGNC:17440	OTTHUMG00000034986.7_7
ENSG00000116183.11_3	PAPPA2	-1.44813	0.000329983	0.00355544	-1	3.84036	7.90421	7.01137	2.25913	2.27114	2.35158	0.351488	0.723431	0.641714	0.206767	0.207866	0.215227	protein_coding	HGNC:14615	OTTHUMG00000035025.5_3
ENSG00000152092.16_4	ASTN1	0.231651	0.0226537	0.0653745	0	40.5784	33.6393	33.325	43.9168	41.1696	41.1323	4.41022	3.65605	3.62189	4.77304	4.47447	4.47042	protein_coding	HGNC:773	OTTHUMG00000035041.3_4
ENSG00000198797.7_3	BRINP2	1.08031	0.0434089	0.105648	0	17.2816	5.60345	5.01052	27.5575	15.0721	15.9542	3.84719	1.24743	1.11543	6.1348	3.35533	3.5517	protein_coding	HGNC:13746	OTTHUMG00000034953.3_3
ENSG00000224687.2_5	RASAL2-AS1	0.667307	0.00619371	0.0264398	1	0.920901	1.37303	1.05927	1.69435	1.69303	1.94613	0.288956	0.430823	0.332373	0.531644	0.531231	0.610647	lncRNA	HGNC:44170	OTTHUMG00000040865.2_5
ENSG00000075391.16_6	RASAL2	0.551724	1.93183e-05	0.000557257	0	37.2475	40.7456	39.2603	60.6655	53.6816	57.5325	2.32159	2.53962	2.44704	3.7812	3.3459	3.58592	protein_coding	HGNC:9874	OTTHUMG00000035022.4_6
ENSG00000116199.12_4	FAM20B	-0.134326	0.0202023	0.0601931	0	63.2679	61.6936	60.7316	56.0888	56.3037	56.7824	10.4644	10.204	10.0449	9.27701	9.31255	9.39174	protein_coding	HGNC:23017	OTTHUMG00000035073.4_4
ENSG00000186283.14_5	TOR3A	-0.0837427	0.167766	0.281897	0	56.2926	53.8822	58.2263	53.0312	54.9617	50.9238	17.4605	16.7128	18.0603	16.4489	17.0477	15.7952	protein_coding	HGNC:11997	OTTHUMG00000035077.6_5
ENSG00000143322.21_5	ABL2	-0.189797	0.0471264	0.112316	0	113.428	138.769	133.435	110.62	107.859	119.647	6.79655	8.31499	7.99536	6.6283	6.46286	7.16919	protein_coding	HGNC:77	OTTHUMG00000035199.11_5
ENSG00000057252.13_3	SOAT1	-0.277728	0.00137382	0.00936403	0	86.9958	83.6621	78.7055	66.1381	67.391	72.1488	12.4191	11.9432	11.2356	9.44155	9.62041	10.2996	protein_coding	HGNC:11177	OTTHUMG00000035253.3_3
ENSG00000169905.12_3	TOR1AIP2	-0.131147	0.0697586	0.148847	0	52.2954	48.2973	46.3389	46.5459	42.8833	44.7002	2.77047	2.55866	2.45491	2.46588	2.27184	2.3681	protein_coding	HGNC:24055	OTTHUMG00000035265.5_3
ENSG00000143337.18_5	TOR1AIP1	-0.0513626	0.51053	0.633264	0	70.0473	59.3001	58.3776	61.3861	60.3711	59.357	7.28521	6.16746	6.07151	6.38441	6.27885	6.17338	protein_coding	HGNC:29456	OTTHUMG00000035257.10_5
ENSG00000135837.16_6	CEP350	0.00266537	0.974509	0.9835	0	42.6946	42.4712	39.4621	45.5137	36.9164	42.3892	2.9938	2.97814	2.76713	3.19148	2.58863	2.97238	protein_coding	HGNC:24238	OTTHUMG00000035269.5_6
ENSG00000116260.17_3	QSOX1	0.281623	0.000236108	0.00284182	0	64.4435	63.7161	65.6244	77.1806	79.3868	79.0008	6.94734	6.86892	7.07464	8.32046	8.5583	8.51669	protein_coding	HGNC:9756	OTTHUMG00000035256.4_3
ENSG00000230124.8_5	ACBD6	0.0137371	0.820213	0.882428	0	45.5944	47.5551	50.1725	46.5654	50.3368	47.8221	6.06954	6.33056	6.67898	6.1988	6.70085	6.3661	protein_coding	HGNC:23339	OTTHUMG00000035117.5_5
ENSG00000143324.13_3	XPR1	-0.112154	0.0646486	0.141421	0	91.326	89.0244	84.9435	80.1408	80.1094	85.1838	10.2579	9.99937	9.54099	9.00155	8.99802	9.56799	protein_coding	HGNC:12827	OTTHUMG00000035116.2_3
ENSG00000135835.12_4	KIAA1614	0.0333548	0.805251	0.871128	0	2.99783	3.20992	3.6486	3.25237	3.09701	3.75036	0.286819	0.307111	0.349082	0.311172	0.296308	0.358817	protein_coding	HGNC:29327	OTTHUMG00000035183.3_4
ENSG00000135823.14_4	STX6	-0.288758	0.00139389	0.00945373	0	56.8804	55.1254	51.3494	42.3393	44.8447	46.5247	8.7819	8.51094	7.92797	6.53687	6.92369	7.18306	protein_coding	HGNC:11441	OTTHUMG00000035179.2_4
ENSG00000162783.10_2	IER5	0.484946	7.65096e-06	0.000293853	0	45.1242	43.3804	45.5823	61.1135	63.6746	62.8844	10.7746	10.3583	10.884	14.5925	15.2041	15.0154	protein_coding	HGNC:5393	OTTHUMG00000035178.2_2
ENSG00000135821.18_4	GLUL	0.273927	0.000905325	0.00704526	0	353.783	366.061	379.824	434.085	451.4	444.144	39.1699	40.5294	42.0532	48.0607	49.9778	49.1745	protein_coding	HGNC:4341	OTTHUMG00000037407.3_4
ENSG00000135828.11_3	RNASEL	0.265548	0.0468122	0.111782	0	9.64007	7.44035	7.54941	10.1271	9.35298	10.0956	1.57389	1.21475	1.23256	1.65341	1.52702	1.64825	protein_coding	HGNC:10050	OTTHUMG00000035213.1_3
ENSG00000143333.7_3	RGS16	0.23029	0.091533	0.181224	0	519.996	381.387	399.446	560.83	483.609	481.445	215.945	158.383	165.883	232.903	200.834	199.935	protein_coding	HGNC:9997	OTTHUMG00000035212.2_3
ENSG00000261504.1_5	LINC01686	0.0258549	0.890735	0.930406	0	3.19376	2.05955	2.32031	2.29808	2.68408	2.71648	2.32105	1.49676	1.68627	1.67012	1.95064	1.97418	lncRNA	HGNC:27643	OTTHUMG00000176155.1_5
ENSG00000135824.12_3	RGS8	0.315413	0.00106438	0.0077908	0	611.675	545.26	556.269	733.615	698.438	699.776	91.4996	81.5648	83.2115	109.74	104.478	104.679	protein_coding	HGNC:16810	OTTHUMG00000035219.6_3
ENSG00000135838.13_2	NPL	1.31273	1.20982e-08	6.89244e-06	1	23.1205	21.0964	21.5553	56.8678	53.599	52.8902	4.64734	4.24049	4.33273	11.4307	10.7737	10.6312	protein_coding	HGNC:16781	OTTHUMG00000035321.3_2
ENSG00000135829.17_3	DHX9	-0.0676522	0.324069	0.45624	0	295.629	327.672	328.794	294.778	295.269	318.456	50.1236	55.5565	55.7468	49.9793	50.0626	53.9939	protein_coding	HGNC:2750	OTTHUMG00000035337.6_3
ENSG00000135862.6_3	LAMC1	0.421053	0.000195885	0.00251182	0	596.431	652.988	637.664	851.323	791.163	884.152	70.6169	77.3133	75.499	100.796	93.6731	104.683	protein_coding	HGNC:6492	OTTHUMG00000035418.6_3
ENSG00000157064.11_3	NMNAT2	0.744881	0.00087188	0.00686706	1	2.70392	2.18943	2.48845	3.56398	4.04676	4.76397	0.389446	0.315343	0.358411	0.51332	0.582855	0.686154	protein_coding	HGNC:16789	OTTHUMG00000035519.3_3
ENSG00000116698.21_4	SMG7	0.105383	0.0609971	0.135722	0	82.4501	86.7236	84.3382	92.5076	88.0377	92.1777	9.91344	10.4273	10.1405	11.1227	10.5853	11.083	protein_coding	HGNC:16792	OTTHUMG00000035221.9_4
ENSG00000162704.16_4	ARPC5	-0.371723	0.000259253	0.00301131	0	268.903	272.769	246.205	194.441	203.267	211.196	25.2491	25.6122	23.1178	18.2574	19.0861	19.8306	protein_coding	HGNC:708	OTTHUMG00000035326.5_4
ENSG00000143344.15_3	RGL1	-0.234068	0.00105138	0.00772879	0	73.8681	76.9454	77.4109	63.6063	64.6656	65.7833	13.9242	14.5043	14.5921	11.9899	12.1896	12.4002	protein_coding	HGNC:30281	OTTHUMG00000035328.3_3
ENSG00000198756.12_4	COLGALT2	-0.0560312	0.461597	0.591399	0	77.0814	90.1006	89.0965	77.4727	83.5574	85.5284	9.87464	11.5425	11.4138	9.92476	10.7043	10.9568	protein_coding	HGNC:16790	OTTHUMG00000035460.4_4
ENSG00000198860.12_4	TSEN15	-0.321573	0.00175163	0.0109361	0	60.3092	61.1556	57.9405	43.1572	51.5343	48.8763	5.91441	5.99741	5.68211	4.23235	5.05387	4.7932	protein_coding	HGNC:16791	OTTHUMG00000035461.6_4
ENSG00000116667.14_5	C1orf21	-0.21888	0.00142768	0.00958175	0	83.0771	80.2296	79.3108	69.0009	70.5293	68.9255	7.52442	7.26651	7.1833	6.24952	6.38795	6.24269	protein_coding	HGNC:15494	OTTHUMG00000035386.7_5
ENSG00000116406.19_5	EDEM3	0.0424557	0.620502	0.727909	0	47.7301	43.8628	39.2939	46.916	41.5	46.322	6.12553	5.62921	5.04285	6.02104	5.32597	5.94481	protein_coding	HGNC:16787	OTTHUMG00000035387.5_5
ENSG00000135842.17_3	FAM129A	1.76887	7.05218e-06	0.000283601	1	0.842527	1.09471	0.857505	2.62916	3.44801	3.46655	0.101144	0.131418	0.102942	0.315626	0.413926	0.416152	protein_coding	HGNC:16784	OTTHUMG00000035388.3_3
ENSG00000121481.11_3	RNF2	-0.463521	0.00024679	0.00292434	0	28.3324	23.9724	25.2039	18.9495	17.9833	19.2586	7.25356	6.13732	6.45262	4.85137	4.60402	4.93052	protein_coding	HGNC:10061	OTTHUMG00000035391.3_3
ENSG00000121486.12_4	TRMT1L	-0.116769	0.281871	0.411642	0	21.2787	18.3689	16.6625	15.7555	18.0659	18.0828	4.33022	3.73808	3.39082	3.20625	3.67642	3.67985	protein_coding	HGNC:16782	OTTHUMG00000035389.3_4
ENSG00000116668.13_7	SWT1	-0.0780682	0.408253	0.540059	0	5.87809	5.82611	5.54856	5.33623	5.32686	5.67622	1.44496	1.43218	1.36395	1.31176	1.30945	1.39533	protein_coding	HGNC:16785	OTTHUMG00000035390.3_7
ENSG00000116679.16_3	IVNS1ABP	0.0606193	0.347949	0.481732	0	192.939	213.191	207.768	202.368	217.926	219.974	24.5064	27.0787	26.39	25.704	27.6802	27.9403	protein_coding	HGNC:16951	OTTHUMG00000035384.2_3
ENSG00000047410.14_3	TPR	0.0455515	0.54192	0.660339	0	124.185	121.81	120.959	137.729	113.516	127.451	10.0554	9.86317	9.79423	11.1522	9.19157	10.3199	protein_coding	HGNC:12017	OTTHUMG00000035580.5_3
ENSG00000157181.16_5	ODR4	-0.0540759	0.387924	0.521388	0	23.2968	22.7478	22.1943	22.3382	20.9358	22.4413	5.71983	5.58502	5.44912	5.48445	5.14014	5.50978	protein_coding	HGNC:24299	OTTHUMG00000035579.7_5
ENSG00000116741.8_3	RGS2	0.423817	0.0141581	0.0470777	0	7.91583	5.62201	6.18749	9.52342	8.9194	7.98725	3.79111	2.69253	2.96336	4.56102	4.27174	3.82531	protein_coding	HGNC:9998	OTTHUMG00000035600.3_3
ENSG00000116750.13_6	UCHL5	-0.103408	0.141291	0.248876	0	28.9398	26.069	25.9942	25.4153	25.3955	24.5699	4.34467	3.91368	3.90244	3.81553	3.81257	3.68862	protein_coding	HGNC:19678	OTTHUMG00000035561.5_6
ENSG00000116747.12_5	RO60	-0.269976	0.0244088	0.0691404	0	62.1706	54.3275	46.2717	43.9947	44.5144	46.4233	6.83044	5.96874	5.08368	4.83352	4.89062	5.10035	protein_coding	HGNC:11313	OTTHUMG00000035675.5_5
ENSG00000023572.9_3	GLRX2	0.00419657	0.962416	0.976065	0	16.3803	15.4002	13.4174	14.3922	15.4025	15.5082	2.63773	2.47991	2.16062	2.31759	2.48027	2.4973	protein_coding	HGNC:16065	OTTHUMG00000035677.2_3
ENSG00000134371.13_7	CDC73	-0.241645	0.00509449	0.0229739	0	62.6017	57.556	54.5104	48.3766	51.1833	48.1465	5.94113	5.46228	5.17324	4.59112	4.85748	4.56928	protein_coding	HGNC:16783	OTTHUMG00000035676.8_7
ENSG00000162630.5_2	B3GALT2	0.337103	0.206006	0.326879	0	4.56532	8.18253	7.85206	6.21262	9.91044	9.97392	1.39442	2.49924	2.39831	1.89756	3.02701	3.0464	protein_coding	HGNC:917	OTTHUMG00000035687.1_2
ENSG00000162687.17_4	KCNT2	-0.420464	0.0224206	0.0649622	0	1.64587	2.11521	1.86634	1.38275	1.42463	1.39878	0.231812	0.297917	0.262864	0.194753	0.200652	0.197012	protein_coding	HGNC:18866	OTTHUMG00000035611.5_4
ENSG00000000971.15_2	CFH	3.04911	1.03369e-07	2.06284e-05	1	0.822933	0.853506	1.05927	6.03734	8.65099	8.10888	0.101035	0.104789	0.130052	0.741233	1.06212	0.995565	protein_coding	HGNC:4883	OTTHUMG00000035607.5_2
ENSG00000066279.18_4	ASPM	-0.339428	0.0162938	0.0516904	0	68.2251	69.2824	57.5369	58.4648	43.4821	52.1401	6.26608	6.36319	5.28443	5.36966	3.99358	4.78877	protein_coding	HGNC:19048	OTTHUMG00000036277.2_4
ENSG00000177888.7_2	ZBTB41	-0.0230496	0.862229	0.91234	0	16.008	12.8211	10.929	13.3016	12.5326	13.2377	1.86966	1.49745	1.27645	1.55356	1.46374	1.5461	protein_coding	HGNC:24819	OTTHUMG00000036275.2_2
ENSG00000213047.13_4	DENND1B	-0.221354	0.119802	0.220762	0	8.81714	8.01554	6.40607	6.32947	6.46243	7.11554	0.667814	0.6071	0.485198	0.479396	0.489467	0.538934	protein_coding	HGNC:28404	OTTHUMG00000035653.7_4
ENSG00000203724.11_3	C1orf53	0.270457	0.213357	0.335551	0	0.822933	0.760734	0.773436	0.740061	1.09428	1.01361	1.3104	1.21136	1.23159	1.17844	1.74248	1.61403	protein_coding	HGNC:30003	OTTHUMG00000035659.2_3
ENSG00000151414.15_4	NEK7	0.030357	0.831371	0.890508	0	27.9405	20.6697	18.3271	22.2992	22.8147	23.1711	5.12295	3.78982	3.3603	4.0886	4.18311	4.24846	protein_coding	HGNC:13386	OTTHUMG00000035658.7_4
ENSG00000162702.8_3	ZNF281	-0.251652	0.00434711	0.0206454	0	35.4449	36.8678	32.8542	30.7515	28.1828	29.3744	7.24104	7.53172	6.71179	6.28222	5.75747	6.0009	protein_coding	HGNC:13075	OTTHUMG00000035724.3_3
ENSG00000118193.12_3	KIF14	-0.279422	0.0569657	0.128989	0	37.0124	28.778	28.987	30.0114	22.8353	25.1781	5.07436	3.94543	3.97409	4.11453	3.1307	3.45189	protein_coding	HGNC:19181	OTTHUMG00000035723.2_3
ENSG00000118197.14_7	DDX59	-0.227283	0.0141726	0.0471031	0	14.6169	12.9696	13.5519	12.0942	11.5622	11.4741	3.31448	2.94095	3.073	2.74244	2.62181	2.60183	protein_coding	HGNC:25360	OTTHUMG00000035725.9_7
ENSG00000118200.14_4	CAMSAP2	-0.125871	0.070489	0.149821	0	88.8964	88.9873	79.8657	80.2187	75.2574	80.7036	11.4307	11.4424	10.2695	10.3149	9.67692	10.3772	protein_coding	HGNC:29188	OTTHUMG00000035740.4_4
ENSG00000163362.11_8	INAVA	-0.306888	0.0186587	0.0567061	0	16.0472	14.1756	14.1741	13.6717	10.5711	11.616	3.00453	2.65411	2.65382	2.55976	1.97924	2.17487	protein_coding	HGNC:25599	OTTHUMG00000035789.12_8
ENSG00000116852.14_3	KIF21B	0.502922	0.0687173	0.147338	0	0.822933	0.723625	0.773436	1.44117	0.784577	1.05415	0.0677311	0.0595576	0.0636573	0.118615	0.0645742	0.0867617	protein_coding	HGNC:29442	OTTHUMG00000035787.5_3
ENSG00000116857.17_4	TMEM9	-0.108429	0.0855564	0.172412	0	73.7113	72.1027	75.4437	64.4827	71.7268	69.0471	18.8087	18.3982	19.2507	16.4539	18.3023	17.6186	protein_coding	HGNC:18823	OTTHUMG00000035831.8_4
ENSG00000081277.12_3	PKP1	3.33268	1.81622e-06	0.000126057	1	0.64659	1.24315	1.14334	6.91373	12.0783	11.839	0.104104	0.200153	0.184083	1.11314	1.94467	1.90613	protein_coding	HGNC:9023	OTTHUMG00000035729.3_3
ENSG00000174307.6_2	PHLDA3	0.486308	0.0035204	0.0178443	0	111.351	142.331	151.61	167.819	208.697	191.37	35.4846	45.3574	48.3143	53.4795	66.5065	60.9846	protein_coding	HGNC:8934	OTTHUMG00000035767.3_2
ENSG00000159176.14_3	CSRP1	0.0260142	0.879926	0.92349	0	597.038	909.578	953.411	732.485	913.928	858.487	57.8637	88.1545	92.4027	70.991	88.5761	83.2029	protein_coding	HGNC:2469	OTTHUMG00000035773.6_3
ENSG00000134369.15_4	NAV1	0.168771	0.118953	0.219581	0	217.254	264.438	250.358	307.359	249.578	265.971	9.67596	11.7774	11.1503	13.689	11.1156	11.8457	protein_coding	HGNC:15989	OTTHUMG00000035766.7_4
ENSG00000231871.5_7	IPO9-AS1	-0.297875	0.139533	0.246619	0	0.822933	1.0205	1.0929	0.798487	0.82587	0.770344	0.645944	0.801018	0.857848	0.626756	0.64825	0.604665	lncRNA	HGNC:40892	OTTHUMG00000035809.1_7
ENSG00000198700.10_3	IPO9	-0.172587	0.027671	0.0760647	0	274.585	311.307	314.923	263.481	267.128	268.667	23.0666	26.1515	26.4552	22.1338	22.4402	22.5695	protein_coding	HGNC:19425	OTTHUMG00000035805.2_3
ENSG00000198892.6_2	SHISA4	-0.233487	0.0244811	0.0693167	0	60.1133	70.2473	72.3835	53.1091	62.0022	57.3906	34.4292	40.2333	41.4568	30.4176	35.511	32.8698	protein_coding	HGNC:27139	OTTHUMG00000035807.1_2
ENSG00000163431.13_5	LMOD1	-1.02418	0.0156277	0.0503245	0	3.64442	8.64639	9.41574	2.55126	4.15	4.0139	0.918684	2.17958	2.37352	0.643121	1.04613	1.01182	protein_coding	HGNC:6647	OTTHUMG00000035802.3_5
ENSG00000134375.11_3	TIMM17A	-0.140153	0.0574798	0.129819	0	73.535	79.8028	74.8047	64.1905	69.5383	73.3043	20.986	22.7748	21.3484	18.3192	19.8454	20.9202	protein_coding	HGNC:17315	OTTHUMG00000035806.2_3
ENSG00000176393.11_5	RNPEP	0.0136496	0.813848	0.877582	0	100.182	98.6727	106.448	97.4933	106.888	103.854	28.9963	28.5594	30.8099	28.218	30.9373	30.0592	protein_coding	HGNC:10078	OTTHUMG00000035866.5_5
ENSG00000143862.8_3	ARL8A	-0.023915	0.770986	0.846314	0	60.6619	69.6535	74.3339	63.9179	70.5087	66.9185	30.7149	35.2676	37.6374	32.3635	35.7006	33.8828	protein_coding	HGNC:25192	OTTHUMG00000035923.2_3
ENSG00000077152.11_4	UBE2T	-0.632692	6.81314e-06	0.000276563	-1	38.1096	34.9195	36.4692	22.5524	24.9413	23.1306	23.0688	21.1377	22.0758	13.6516	15.0976	14.0016	protein_coding	HGNC:25009	OTTHUMG00000041392.5_4
ENSG00000077157.22_7	PPP1R12B	0.101342	0.353107	0.486784	0	15.283	15.9012	15.62	19.2416	14.3288	16.6232	0.725381	0.75472	0.741376	0.913265	0.680091	0.788989	protein_coding	HGNC:7619	OTTHUMG00000041393.7_7
ENSG00000117139.17_6	KDM5B	-0.0209171	0.714469	0.803169	0	116.857	122.293	121.581	117.611	112.773	125.161	4.51497	4.725	4.6975	4.54413	4.35718	4.83582	protein_coding	HGNC:18039	OTTHUMG00000041401.11_6
ENSG00000228288.7_6	PCAT6	0.572189	0.00288373	0.0154614	0	1.66546	1.68846	1.66457	2.57074	2.70472	2.1894	1.8713	1.89714	1.8703	2.88847	3.03902	2.46	lncRNA	HGNC:43714	OTTHUMG00000041399.3_6
ENSG00000214796.8_5	AC098934.1	-0.233714	0.130734	0.234817	0	2.27286	2.05955	1.91678	1.90858	1.67239	1.72314	0.768378	0.696263	0.647997	0.645226	0.565378	0.582535	transcribed_unprocessed_pseudogene	NA	OTTHUMG00000041379.1_5
ENSG00000183155.4_2	RABIF	0.106046	0.165045	0.278738	0	27.5683	26.5515	27.911	27.6354	32.0851	28.5838	11.345	10.9265	11.486	11.3726	13.2037	11.7629	protein_coding	HGNC:9797	OTTHUMG00000041400.1_2
ENSG00000117153.16_4	KLHL12	0.0151777	0.799493	0.867164	0	50.6496	50.8393	53.1485	48.9219	54.3835	52.9915	14.4383	14.4924	15.1507	13.9458	15.5027	15.1059	protein_coding	HGNC:19360	OTTHUMG00000041385.10_4
ENSG00000159346.13_4	ADIPOR1	-0.0392516	0.50283	0.626632	0	86.7999	87.2061	91.5513	83.5879	91.5064	83.3593	27.883	28.0135	29.4093	26.8512	29.3949	26.7778	protein_coding	HGNC:24040	OTTHUMG00000041391.10_4
ENSG00000159348.13_5	CYB5R1	0.31024	0.000467403	0.00454538	0	38.8934	38.4634	39.8656	45.7864	50.4194	49.1601	8.65259	8.55694	8.86887	10.1861	11.2168	10.9366	protein_coding	HGNC:13397	OTTHUMG00000041387.4_5
ENSG00000163444.12_3	TMEM183A	-0.017007	0.752868	0.83298	0	35.5821	36.3668	38.0329	36.3019	36.5447	35.8615	8.8118	9.00614	9.41874	8.99008	9.05021	8.88101	protein_coding	HGNC:20173	OTTHUMG00000042051.4_3
ENSG00000143847.15_3	PPFIA4	1.18988	0.000320171	0.00349558	1	0.822933	0.890615	0.857505	2.41494	1.50721	1.94613	0.0847773	0.0917498	0.0883389	0.248783	0.155271	0.200487	protein_coding	HGNC:9248	OTTHUMG00000042123.4_3
ENSG00000163485.17_3	ADORA1	-0.36212	0.000443594	0.00434972	0	352.744	385.859	399.278	293.415	307.1	284.804	84.1671	92.0685	95.2703	70.0107	73.276	67.9561	protein_coding	HGNC:262	OTTHUMG00000042125.4_3
ENSG00000133048.13_3	CHI3L1	0.371422	0.0507621	0.118645	0	2.35124	2.0781	1.84952	3.19395	2.39502	2.51375	0.699149	0.617931	0.549962	0.949732	0.712169	0.747473	protein_coding	HGNC:1932	OTTHUMG00000042122.3_3
ENSG00000159388.6_4	BTG2	0.331123	0.000175322	0.00232961	0	140.624	131.681	136.579	167.604	177.252	169.516	51.006	47.7625	49.5389	60.7923	64.2918	61.4857	protein_coding	HGNC:1131	OTTHUMG00000035834.6_4
ENSG00000058668.14_4	ATP2B4	-0.0813422	0.335573	0.468719	0	147.697	133.481	124.086	134.477	117.067	131.445	15.1936	13.7312	12.7647	13.8336	12.0427	13.5218	protein_coding	HGNC:817	OTTHUMG00000035906.4_4
ENSG00000257315.2_4	ZBED6	0.142708	0.565131	0.680317	0	1.01887	1.07616	0.975202	1.51907	0.805223	1.05415	0.0816337	0.0862238	0.0781349	0.121711	0.0645159	0.0844607	protein_coding	HGNC:33273	OTTHUMG00000170422.3_4
ENSG00000182004.13_3	SNRPE	-0.195746	0.0115768	0.040707	0	59.0161	58.3909	52.7618	48.0845	49.2838	51.1873	28.3731	28.0726	25.3662	23.1175	23.6941	24.6093	protein_coding	HGNC:11161	OTTHUMG00000035985.3_3
ENSG00000143842.15_6	SOX13	0.0397088	0.628837	0.734754	0	92.1489	85.5733	85.9187	101.642	85.0233	84.2918	12.419	11.5328	11.5793	13.6983	11.4587	11.3601	protein_coding	HGNC:11192	OTTHUMG00000036050.6_6
ENSG00000143845.15_5	ETNK2	-0.059842	0.634148	0.739267	0	13.0102	9.72255	12.0891	10.3803	12.3674	10.6632	2.88282	2.15434	2.67874	2.30009	2.7404	2.36277	protein_coding	HGNC:25575	OTTHUMG00000036061.7_5
ENSG00000143850.15_6	PLEKHA6	-0.317764	0.106648	0.202639	0	1.15603	0.927724	0.958388	0.817962	0.846517	0.770344	0.139921	0.112288	0.116	0.0990029	0.102459	0.0932394	protein_coding	HGNC:17053	OTTHUMG00000036057.9_6
ENSG00000158615.9_3	PPP1R15B	-0.0677524	0.201588	0.321667	0	65.5408	65.0334	63.1527	63.1194	59.8136	61.891	12.4626	12.3661	12.0085	12.0022	11.3736	11.7686	protein_coding	HGNC:14951	OTTHUMG00000036105.5_3
ENSG00000133056.13_5	PIK3C2B	-0.408976	0.000235181	0.00283566	0	27.2744	31.1901	29.9118	21.7149	22.092	22.7657	2.89721	3.31316	3.17737	2.30667	2.34672	2.41828	protein_coding	HGNC:8972	OTTHUMG00000036101.4_5
ENSG00000198625.13_4	MDM4	0.0406298	0.70876	0.798984	0	16.008	16.161	13.9387	17.8199	13.792	15.7718	1.45422	1.46811	1.26623	1.61881	1.25291	1.43276	protein_coding	HGNC:6974	OTTHUMG00000035877.5_4
ENSG00000174529.7_2	TMEM81	0.0130345	0.934864	0.957215	0	1.68505	1.98533	2.20261	1.83068	1.92015	2.1894	1.26506	1.49049	1.65361	1.37438	1.44155	1.64369	protein_coding	HGNC:32349	OTTHUMG00000037103.1_2
ENSG00000117222.14_4	RBBP5	-0.0112859	0.831255	0.890461	0	30.762	30.3551	30.2649	29.6803	30.7637	30.2259	6.98502	6.89263	6.87214	6.7394	6.98539	6.86327	protein_coding	HGNC:9888	OTTHUMG00000037104.2_4
ENSG00000133059.17_3	DSTYK	0.0817758	0.205458	0.326274	0	34.4456	38.5562	37.4108	38.0742	39.0843	39.7132	4.06438	4.54941	4.41425	4.49253	4.61172	4.68593	protein_coding	HGNC:29043	OTTHUMG00000037102.4_3
ENSG00000133069.17_6	TMCC2	-0.445599	0.000483834	0.00464243	0	16.5566	19.074	19.4536	13.7106	12.8423	13.9067	2.84381	3.27619	3.34139	2.35496	2.20582	2.38865	protein_coding	HGNC:24239	OTTHUMG00000037195.6_6
ENSG00000163545.9_3	NUAK2	0.123777	0.681436	0.777014	0	12.1089	29.7799	29.441	22.1629	28.4306	27.2864	3.519	8.65444	8.55595	6.44082	8.2623	7.92978	protein_coding	HGNC:29558	OTTHUMG00000037196.3_3
ENSG00000158711.13_2	ELK4	0.11447	0.275811	0.405284	0	25.5697	24.7517	20.1598	26.8369	23.5373	25.8673	2.10589	2.03852	1.66033	2.21026	1.9385	2.1304	protein_coding	HGNC:3326	OTTHUMG00000037221.3_2
ENSG00000158715.6_3	SLC45A3	-0.365987	0.00603358	0.0259752	0	9.67926	8.21963	8.30603	7.28376	6.52437	6.50738	2.57976	2.19073	2.21376	1.9413	1.73891	1.73438	protein_coding	HGNC:8642	OTTHUMG00000037223.2_3
ENSG00000069275.13_3	NUCKS1	-0.257802	0.00489411	0.0222834	0	559.242	520.991	482.675	438.545	421.07	447.509	86.7176	80.7864	74.8449	68.0019	65.2923	69.392	protein_coding	HGNC:29923	OTTHUMG00000035996.2_3
ENSG00000117280.13_3	RAB29	0.133147	0.279662	0.409407	0	13.0494	13.7674	13.9387	12.1526	16.6	15.9745	3.34256	3.52649	3.57035	3.11285	4.25205	4.09183	protein_coding	HGNC:9789	OTTHUMG00000035998.4_3
ENSG00000133065.11_3	SLC41A1	-0.23033	0.00246106	0.0139107	0	46.5153	45.3657	48.5583	38.5611	40.1992	40.9701	7.29309	7.11284	7.61341	6.04595	6.30279	6.42366	protein_coding	HGNC:19429	OTTHUMG00000036000.4_3
ENSG00000196550.10_2	FAM72A	-0.112545	0.473744	0.601632	0	2.64514	2.26365	2.28668	2.45389	1.87885	2.31103	0.699218	0.598373	0.604462	0.648661	0.496657	0.610899	protein_coding	HGNC:24044	OTTHUMG00000042552.3_2
ENSG00000163486.8	SRGAP2	0.105438	0.183535	0.300464	0	82.2933	72.6964	72.4676	87.7946	76.7233	80.136	8.88409	7.84805	7.82334	9.47799	8.28277	8.65119	protein_coding	NA	OTTHUMG00000036347.3
ENSG00000263528.8_3	IKBKE	0.387928	0.00342616	0.017525	0	6.44631	5.49213	6.22112	8.31595	7.57736	7.86561	1.70042	1.44873	1.64102	2.1936	1.99878	2.07481	protein_coding	HGNC:14552	OTTHUMG00000184613.2_3
ENSG00000266094.7_3	RASSF5	-1.05234	0.00165503	0.0105644	-1	3.21336	1.81834	2.30349	1.01271	1.32139	1.19606	0.461358	0.261068	0.330724	0.145401	0.189719	0.171724	protein_coding	HGNC:17609	OTTHUMG00000184616.2_3
ENSG00000143486.16_6	EIF2D	0.174986	0.0122515	0.0423767	0	50.003	51.4516	50.9291	54.0244	59.2355	58.7894	6.20308	6.38278	6.31796	6.70195	7.34841	7.29306	protein_coding	HGNC:6583	OTTHUMG00000184619.3_6
ENSG00000143479.17_5	DYRK3	0.546182	0.00108743	0.00787523	0	10.0515	7.99698	7.75118	13.029	11.6654	12.9337	0.974553	0.775352	0.75152	1.26323	1.13103	1.25399	protein_coding	HGNC:3094	OTTHUMG00000036339.5_5
ENSG00000162889.10_4	MAPKAPK2	0.00154696	0.977532	0.985533	0	146.11	150.941	156.301	148.499	157.7	147.663	34.8295	35.9811	37.259	35.3991	37.5923	35.1997	protein_coding	HGNC:6887	OTTHUMG00000036342.2_4
ENSG00000123836.15_6	PFKFB2	0.357829	0.0146221	0.0480826	0	5.19232	6.12298	5.21229	7.47851	6.19403	7.50071	0.510251	0.601708	0.512214	0.734917	0.60869	0.737099	protein_coding	HGNC:8873	OTTHUMG00000036033.4_6
ENSG00000180667.10_2	YOD1	-0.137519	0.44821	0.579054	0	8.87592	7.94132	5.68307	7.86802	6.02885	6.50738	1.36113	1.21781	0.871503	1.20657	0.924529	0.997911	protein_coding	HGNC:25035	OTTHUMG00000036032.2_2
ENSG00000117335.19_4	CD46	0.228893	0.0173647	0.0539233	0	95.1272	93.3661	81.9842	111.048	96.4823	109.389	10.9241	10.7219	9.41482	12.7524	11.0797	12.5619	protein_coding	HGNC:6953	OTTHUMG00000036397.15_4
ENSG00000076356.7_3	PLXNA2	-0.398206	0.00290105	0.0155188	0	30.6053	39.3912	38.5373	27.6939	26.5104	28.1784	2.21057	2.84515	2.78348	2.00028	1.9148	2.03527	protein_coding	HGNC:9100	OTTHUMG00000036564.7_3
ENSG00000196878.15_4	LAMB3	1.31617	7.1705e-05	0.0012618	1	0.705371	0.53808	0.521229	1.48012	1.50721	1.39878	0.151791	0.115791	0.112165	0.318511	0.324341	0.301008	protein_coding	HGNC:6490	OTTHUMG00000036360.5_4
ENSG00000162757.4_3	C1orf74	0.0922957	0.525992	0.646882	0	3.0762	2.43064	2.60614	3.17447	2.74602	2.71648	0.656747	0.518923	0.556393	0.677727	0.586255	0.579948	protein_coding	HGNC:26319	OTTHUMG00000036483.2_3
ENSG00000117597.18_5	UTP25	0.171759	0.0614264	0.136455	0	14.4209	16.6248	16.7466	16.963	18.3343	18.5693	1.38516	1.59685	1.60855	1.62933	1.76105	1.78363	protein_coding	HGNC:28440	OTTHUMG00000036654.4_5
ENSG00000203706.8_5	SERTAD4-AS1	-0.0889047	0.446188	0.577229	0	3.68361	3.52535	3.6486	3.29132	3.71642	3.20301	3.66893	3.51131	3.63406	3.27821	3.70161	3.19025	lncRNA	HGNC:32019	OTTHUMG00000036392.2_5
ENSG00000082497.12_3	SERTAD4	-0.24035	0.0318198	0.0843001	0	14.5385	17.8123	15.7041	12.7563	13.2965	14.6365	2.65786	3.25636	2.87095	2.33205	2.43081	2.67578	protein_coding	HGNC:25236	OTTHUMG00000036391.2_3
ENSG00000054392.13_5	HHAT	0.566505	8.11688e-05	0.00138434	0	13.3825	13.8602	14.7457	18.8131	21.452	21.9548	2.01391	2.08581	2.21907	2.83117	3.22829	3.30396	protein_coding	HGNC:18270	OTTHUMG00000036447.4_5
ENSG00000143473.13_6	KCNH1	0.523711	0.00169044	0.0106809	0	41.2642	56.4798	57.6882	73.1297	74.8651	75.5748	4.21192	5.76501	5.88836	7.4645	7.64164	7.71407	protein_coding	HGNC:6250	OTTHUMG00000036309.9_6
ENSG00000234233.1_6	KCNH1-IT1	0.987494	0.000107905	0.00167797	1	1.70465	2.13377	2.40438	3.99243	4.19129	4.23689	2.72308	3.40857	3.84086	6.37769	6.69535	6.7682	lncRNA	HGNC:41351	OTTHUMG00000046162.1_6
ENSG00000117625.13_5	RCOR3	0.34427	0.000319466	0.00349444	0	39.9514	38.6304	36.0152	49.0777	46.7649	49.6061	4.39413	4.24884	3.9612	5.3979	5.14352	5.45601	protein_coding	HGNC:25594	OTTHUMG00000036996.4_5
ENSG00000082512.15_3	TRAF5	-0.00313616	0.969155	0.979977	0	9.71845	10.205	10.5255	9.69869	9.93109	10.7645	1.07719	1.13112	1.16664	1.075	1.10076	1.19314	protein_coding	HGNC:12035	OTTHUMG00000036997.1_3
ENSG00000153363.13_5	LINC00467	-0.0530956	0.675607	0.772413	0	4.07548	3.54391	4.08576	3.34975	4.06741	3.87199	0.587076	0.510502	0.588557	0.482534	0.585913	0.557763	lncRNA	HGNC:28227	OTTHUMG00000036998.29_5
ENSG00000170385.10_3	SLC30A1	0.252507	0.0412649	0.101807	0	34.2889	31.9879	25.5738	35.445	35.1614	38.7402	5.81858	5.42812	4.3397	6.01477	5.96664	6.57393	protein_coding	HGNC:11012	OTTHUMG00000036995.4_3
ENSG00000117650.13_3	NEK2	-0.478515	0.0019482	0.0117918	0	37.1496	28.1657	30.3826	24.7726	22.5669	21.3061	12.0031	9.10039	9.81667	8.00406	7.29141	6.88403	protein_coding	HGNC:7745	OTTHUMG00000037121.3_3
ENSG00000123684.13_3	LPGAT1	-0.555314	4.99242e-06	0.000229603	0	110.391	105.241	100.631	70.5979	70.488	74.1152	12.5587	11.9728	11.4483	8.03162	8.01911	8.43176	protein_coding	HGNC:28985	OTTHUMG00000037120.2_3
ENSG00000143493.13_4	INTS7	-0.103071	0.0876819	0.175505	0	39.7359	38.9644	36.94	36.4577	35.4298	35.7602	7.46074	7.31589	6.93578	6.84524	6.65224	6.71426	protein_coding	HGNC:24484	OTTHUMG00000037119.4_4
ENSG00000143476.18_3	DTL	-0.200854	0.0216969	0.0634977	0	55.7243	49.0024	49.2645	47.7145	42.9659	43.2609	11.3192	9.95376	10.007	9.69215	8.72758	8.7875	protein_coding	HGNC:30288	OTTHUMG00000037133.2_3
ENSG00000066027.12_4	PPP2R5A	-0.198201	0.0203267	0.0604057	0	20.8085	18.7957	18.243	16.6708	16.6826	17.0489	5.27865	4.76806	4.62786	4.22903	4.23201	4.32494	protein_coding	HGNC:9309	OTTHUMG00000036750.5_4
ENSG00000065600.12_3	TMEM206	-0.267743	0.00364972	0.0182994	0	31.7025	31.5983	34.4347	25.8437	28.9055	26.4552	10.8794	10.8436	11.817	8.86881	9.91951	9.07866	protein_coding	HGNC:25593	OTTHUMG00000036751.2_3
ENSG00000117691.10_3	NENF	-0.00113319	0.988891	0.992885	0	49.376	52.1566	56.3263	48.844	57.9761	50.9643	39.0633	41.2632	44.562	38.6424	45.8671	40.3199	protein_coding	HGNC:30384	OTTHUMG00000036744.5_3
ENSG00000162772.17_6	ATF3	0.210407	0.022687	0.065429	0	17.9086	19.2595	19.8067	20.1959	22.3811	23.3738	4.43282	4.76722	4.90265	4.99898	5.53987	5.78561	protein_coding	HGNC:785	OTTHUMG00000036747.9_6
ENSG00000123685.9_3	BATF3	-0.452077	0.00160257	0.0103463	0	9.91439	8.46084	8.30603	6.56317	6.19403	6.73037	3.85924	3.29344	3.23318	2.55476	2.41106	2.61984	protein_coding	HGNC:28915	OTTHUMG00000036807.3_3
ENSG00000117697.15_3	NSL1	-0.175768	0.0722482	0.152446	0	50.8847	43.5659	40.0001	40.2554	39.3321	39.3889	3.66948	3.1417	2.88455	2.90297	2.83638	2.84048	protein_coding	HGNC:24548	OTTHUMG00000036806.5_3
ENSG00000203705.11_5	TATDN3	-0.261969	0.0197257	0.0591469	0	10.1299	9.62977	9.09628	7.32271	8.54775	8.18997	2.53755	2.41227	2.27863	1.83435	2.14122	2.0516	protein_coding	HGNC:27010	OTTHUMG00000036805.11_5
ENSG00000198468.9_6	FLVCR1-DT	-0.223972	0.21643	0.338935	0	1.82221	1.74412	2.10173	1.34379	1.85821	1.66232	0.426747	0.408459	0.492208	0.314706	0.435177	0.389302	lncRNA	HGNC:39077	OTTHUMG00000036923.4_6
ENSG00000162769.13_3	FLVCR1	-0.192284	0.0966823	0.188498	0	12.6575	12.8211	11.5511	11.1983	9.29104	11.8998	1.97096	1.99644	1.79868	1.74374	1.44675	1.85297	protein_coding	HGNC:24682	OTTHUMG00000036924.4_3
ENSG00000143494.15_5	VASH2	-0.769148	5.85579e-05	0.00111358	-1	5.72135	5.93743	5.48131	3.50555	3.09701	3.44627	0.629688	0.653471	0.60327	0.385819	0.340855	0.379295	protein_coding	HGNC:25723	OTTHUMG00000036925.5_5
ENSG00000174606.14_4	ANGEL2	-0.26649	0.00488707	0.0222662	0	36.5226	32.6744	31.7109	28.8819	26.6756	28.3	4.99147	4.46555	4.33386	3.94723	3.6457	3.8677	protein_coding	HGNC:30534	OTTHUMG00000036927.4_4
ENSG00000136643.12_4	RPS6KC1	0.126615	0.0399005	0.0992468	0	32.7998	31.9694	33.2914	34.8413	36.5654	35.6588	5.29798	5.16385	5.37738	5.62773	5.90622	5.75978	protein_coding	HGNC:10439	OTTHUMG00000036926.4_4
ENSG00000230461.9_7	PROX1-AS1	-0.628197	0.0011173	0.00804041	-1	3.27214	3.13571	2.94242	1.83068	2.2092	2.00695	0.317899	0.304645	0.285866	0.177857	0.214632	0.194982	lncRNA	HGNC:43656	OTTHUMG00000036947.10_7
ENSG00000117707.15_5	PROX1	-0.482827	0.00132053	0.00909603	0	35.3273	35.2535	28.634	26.1553	21.6997	23.09	3.95692	3.94865	3.20721	2.92958	2.43053	2.58625	protein_coding	HGNC:9459	OTTHUMG00000036946.8_5
ENSG00000143499.14_3	SMYD2	0.0652867	0.318216	0.450225	0	40.3237	35.7359	37.3771	38.3274	39.745	40.6052	8.24785	7.30946	7.64515	7.83951	8.12947	8.30542	protein_coding	HGNC:20982	OTTHUMG00000037066.5_3
ENSG00000152104.12_4	PTPN14	0.220396	0.0229198	0.0659752	0	168.466	164.597	156.604	211.638	171.43	187.376	8.98391	8.77756	8.35132	11.2862	9.14196	9.99232	protein_coding	HGNC:9647	OTTHUMG00000037039.4_4
ENSG00000117724.13_3	CENPF	-0.166063	0.0394958	0.098473	0	212.474	215.881	200.152	201.394	172.483	186.261	18.2021	18.4941	17.1466	17.253	14.7762	15.9566	protein_coding	HGNC:1857	OTTHUMG00000036955.2_3
ENSG00000136636.13_5	KCTD3	-0.236421	0.00384065	0.0188964	0	56.704	50.4311	54.5945	45.2606	44.8241	47.1937	11.3024	10.052	10.8819	9.02144	8.93444	9.40675	protein_coding	HGNC:21305	OTTHUMG00000037019.4_5
ENSG00000092978.11_3	GPATCH2	-0.0471089	0.601431	0.711303	0	19.4369	17.9793	15.536	17.2551	16.8477	17.1097	2.1985	2.03363	1.75726	1.95171	1.90564	1.93527	protein_coding	HGNC:25499	OTTHUMG00000000527.9_3
ENSG00000162814.11_3	SPATA17	0.528912	0.0182517	0.0558164	0	1.35196	1.65135	1.14334	1.94753	1.77562	2.25021	0.207515	0.253469	0.175494	0.29893	0.272543	0.34539	protein_coding	HGNC:25184	OTTHUMG00000037875.7_3
ENSG00000067533.6_3	RRP15	-0.00696346	0.915532	0.94634	0	23.1989	24.0281	22.4465	21.7539	23.7438	23.8401	2.94514	3.05041	2.84962	2.7617	3.01432	3.02655	protein_coding	HGNC:24255	OTTHUMG00000039494.5_3
ENSG00000232480.1_6	TGFB2-AS1	0.597654	0.0827384	0.168295	0	0.626997	0.890615	0.605298	0.70111	1.50721	1.01361	1.12567	1.59895	1.08671	1.25873	2.70595	1.81977	lncRNA	HGNC:50628	OTTHUMG00000039520.1_6
ENSG00000092969.12_4	TGFB2	0.355166	0.0577533	0.130329	0	146.796	232.284	216.966	221.22	265.6	275.722	24.2637	38.394	35.8621	36.5653	43.9008	45.5739	protein_coding	HGNC:11768	OTTHUMG00000039521.3_4
ENSG00000143353.12_3	LYPLAL1	-0.0791399	0.477283	0.604419	0	9.58129	9.61122	8.44054	7.65379	9.60074	8.8995	3.25784	3.26801	2.86996	2.60244	3.26445	3.02601	protein_coding	HGNC:20440	OTTHUMG00000037141.3_3
ENSG00000136628.18_3	EPRS	0.166659	0.0183543	0.0560509	0	147.423	153.538	160.538	164.936	173.66	179.45	27.6954	28.8443	30.1594	30.9856	32.6244	33.7121	protein_coding	HGNC:3418	OTTHUMG00000037433.8_3
ENSG00000162813.18_4	BPNT1	-0.35955	0.000756421	0.00624172	0	24.5704	23.0261	24.296	17.6251	20.1306	18.2855	7.89285	7.39676	7.80468	5.66178	6.46662	5.87392	protein_coding	HGNC:1096	OTTHUMG00000037435.7_4
ENSG00000067704.10_3	IARS2	0.0317204	0.565814	0.680959	0	94.7353	91.9189	94.4601	90.3069	98.4644	98.604	22.9106	22.2295	22.844	21.8396	23.8124	23.8462	protein_coding	HGNC:29685	OTTHUMG00000037287.4_3
ENSG00000118873.16_4	RAB3GAP2	0.157634	0.0417694	0.102626	0	40.7744	43.3062	40.9585	47.8313	42.6975	48.9371	3.94222	4.187	3.96002	4.62451	4.12815	4.73142	protein_coding	HGNC:17168	OTTHUMG00000037139.6_4
ENSG00000218283.2_4	MORF4L1P1	-0.140105	0.15279	0.264209	0	14.9108	14.6209	17.2342	13.0095	14.7624	14.6973	15.4196	15.1199	17.8223	13.4535	15.2662	15.1989	processed_pseudogene	HGNC:20400	OTTHUMG00000037285.1_4
ENSG00000116141.15_3	MARK1	-0.329124	0.00145197	0.00967503	0	16.6154	14.992	15.6369	13.0679	12.1816	12.3458	3.06727	2.76759	2.88663	2.41239	2.24877	2.27908	protein_coding	HGNC:6896	OTTHUMG00000037351.2_3
ENSG00000117791.16_3	2021-03-02	-0.130823	0.321153	0.453254	0	3.42889	3.41402	3.51409	3.52503	2.76666	3.16246	1.32033	1.3146	1.35313	1.35735	1.06533	1.21774	protein_coding	HGNC:26064	OTTHUMG00000037354.6_3
ENSG00000186205.13_5	2021-03-01	-0.537868	0.000632591	0.00556233	0	4.95719	5.21381	4.94327	3.36922	3.69577	3.34491	0.544388	0.572568	0.542858	0.370001	0.405861	0.367331	protein_coding	HGNC:26189	OTTHUMG00000037353.6_5
ENSG00000143507.18_3	DUSP10	0.272187	0.00925433	0.034629	0	15.2635	16.2908	17.3855	18.151	21.1836	19.8059	5.39917	5.76259	6.14981	6.42058	7.4933	7.00599	protein_coding	HGNC:3065	OTTHUMG00000037269.3_3
ENSG00000143498.18_3	TAF1A	-0.129983	0.23203	0.357188	0	6.54428	5.90032	7.12906	5.76469	6.19403	5.93976	2.26367	2.04093	2.46595	1.99401	2.14252	2.05457	protein_coding	HGNC:11532	OTTHUMG00000037544.4_3
ENSG00000154305.18_7	MIA3	0.023875	0.728805	0.814572	0	43.929	44.4194	41.631	44.8711	40.447	46.8085	4.32585	4.37414	4.09956	4.41862	3.98296	4.60941	protein_coding	HGNC:24008	OTTHUMG00000037543.8_7
ENSG00000272750.1_6	AL592148.3	-0.03894	0.917257	0.947399	0	0.822933	1.20604	0.487601	0.759536	0.557462	1.11497	0.31101	0.455798	0.184279	0.287051	0.210681	0.42138	lncRNA	NA	OTTHUMG00000185864.2_6
ENSG00000186063.13_3	AIDA	-0.0640699	0.249106	0.376168	0	30.2722	30.3737	29.7605	28.2781	28.9467	29.2528	7.15316	7.17715	7.03225	6.68197	6.83997	6.91228	protein_coding	HGNC:25761	OTTHUMG00000037653.3_3
ENSG00000162819.12_4	BROX	-0.146348	0.146719	0.256402	0	49.4152	41.9702	38.9745	37.7431	38.052	41.9432	9.92273	8.42776	7.8262	7.57894	7.64096	8.42233	protein_coding	HGNC:26512	OTTHUMG00000037650.4_4
ENSG00000228106.6_8	AL392172.1	0.0577395	0.601744	0.711365	0	3.42889	3.26559	3.49728	3.36922	3.69577	3.54764	2.79453	2.66144	2.85027	2.7459	3.01204	2.89131	lncRNA	NA	OTTHUMG00000037767.10_8
ENSG00000154309.8_3	DISP1	0.339991	0.00207487	0.0123615	0	13.5588	12.1346	11.7024	16.184	15.9599	15.1636	2.51929	2.25467	2.17436	3.00705	2.96543	2.81747	protein_coding	HGNC:19711	OTTHUMG00000037893.2_3
ENSG00000162909.18_3	CAPN2	0.00727325	0.88985	0.929837	0	509.043	515.74	509.493	508.227	520.979	512.826	59.2945	60.0746	59.3468	59.1994	60.6849	59.7351	protein_coding	HGNC:1479	OTTHUMG00000037376.5_3
ENSG00000143514.17_4	TP53BP2	-0.326837	0.000213185	0.00265081	0	73.5741	77.7247	80.5887	62.652	61.5273	60.7152	12.3054	12.9996	13.4786	10.4787	10.2906	10.1547	protein_coding	HGNC:12000	OTTHUMG00000037379.5_4
ENSG00000272645.3_5	GTF2IP20	0.254955	0.205422	0.326274	0	4.48695	4.06343	3.51409	5.72573	3.50995	5.12887	1.0825	0.980321	0.84779	1.38136	0.846791	1.23736	transcribed_unprocessed_pseudogene	HGNC:51732	OTTHUMG00000037471.2_5
ENSG00000143756.12_3	FBXO28	-0.131661	0.123805	0.225644	0	50.5908	43.2319	42.0009	40.8202	40.3438	42.7743	8.40379	7.18138	6.9769	6.78076	6.70162	7.10537	protein_coding	HGNC:29046	OTTHUMG00000037495.3_3
ENSG00000143753.13_4	DEGS1	-0.00414489	0.933318	0.956831	0	143.386	150.866	145.171	143.728	146.695	147.744	58.6207	61.6789	59.3502	58.7603	59.9735	60.4022	protein_coding	HGNC:13709	OTTHUMG00000037496.5_4
ENSG00000143748.18_5	NVL	-0.0880315	0.171509	0.28661	0	31.4674	30.1696	29.4746	29.8556	27.5428	28.3	6.8185	6.53729	6.3867	6.46926	5.9681	6.13218	protein_coding	HGNC:8070	OTTHUMG00000037536.9_5
ENSG00000143771.12_4	CNIH4	-0.152735	0.0250521	0.0705971	0	49.0429	46.0151	44.8089	40.7034	42.202	42.896	9.63515	9.0403	8.80331	7.99673	8.29115	8.4275	protein_coding	HGNC:25013	OTTHUMG00000037635.4_4
ENSG00000162923.16_5	WDR26	-0.0709434	0.169008	0.283471	0	112.487	112.069	107.726	106.764	103.069	106.49	10.2485	10.2104	9.81471	9.727	9.39036	9.70207	protein_coding	HGNC:21208	OTTHUMG00000037636.6_5
ENSG00000143786.8_4	CNIH3	0.39839	0.00434496	0.0206424	0	183.142	137.581	143.725	211.171	203.742	197.167	28.7642	21.6085	22.5734	33.1664	31.9997	30.9671	protein_coding	HGNC:26802	OTTHUMG00000037634.4_4
ENSG00000233384.3_7	AC096537.1	0.481646	0.00256884	0.0143245	0	4.83963	3.84078	4.27071	5.90101	6.3592	5.81812	1.17041	0.928846	1.03282	1.42709	1.5379	1.40704	lncRNA	NA	OTTHUMG00000037718.3_7
ENSG00000185842.15_4	DNAH14	0.145872	0.13066	0.234728	0	8.40568	8.20108	7.36446	8.53018	8.77487	9.20358	0.426836	0.416446	0.373963	0.433158	0.445583	0.467353	protein_coding	HGNC:2945	OTTHUMG00000037447.9_4
ENSG00000143815.15_5	LBR	-0.427655	8.16048e-05	0.00138434	0	179.38	168.271	157.546	127.816	121.96	125.789	31.415	29.4695	27.5912	22.3846	21.3591	22.0296	protein_coding	HGNC:6518	OTTHUMG00000037520.18_5
ENSG00000154380.17_5	ENAH	-0.298639	0.00148574	0.00980906	0	437.115	486.647	440.993	386.604	361.504	361.453	29.0557	32.3482	29.3136	25.6982	24.0298	24.0264	protein_coding	HGNC:18271	OTTHUMG00000037742.10_5
ENSG00000227496.3_7	AC099066.2	-0.00614917	0.966011	0.978245	0	1.80262	2.13377	2.11854	2.06438	2.12662	1.84477	0.508209	0.601569	0.597277	0.582007	0.599553	0.520093	lncRNA	NA	OTTHUMG00000037739.8_7
ENSG00000143742.13_4	SRP9	-0.595982	0.00437954	0.0207531	-1	232.165	185.137	141.404	119.539	118.203	131.81	104.579	83.3949	63.6956	53.8465	53.2444	59.3738	protein_coding	HGNC:11304	OTTHUMG00000037738.4_4
ENSG00000143819.12_4	EPHX1	0.207875	0.00731544	0.0295273	0	76.6504	85.2949	86.2886	94.6694	98.1547	93.9211	30.5623	34.0091	34.4053	37.747	39.1366	37.4486	protein_coding	HGNC:3401	OTTHUMG00000037743.4_4
ENSG00000196187.12_5	TMEM63A	0.419064	0.0084077	0.0324112	0	47.7105	42.4155	43.3461	70.5979	48.685	59.1137	4.60971	4.09812	4.18802	6.82105	4.70387	5.71147	protein_coding	HGNC:29118	OTTHUMG00000037442.5_5
ENSG00000143811.19_4	PYCR2	-0.0580485	0.326226	0.458332	0	56.7432	52.2865	52.8291	53.226	50.0271	52.2009	15.7532	14.516	14.6666	14.7768	13.8887	14.4922	protein_coding	HGNC:30262	OTTHUMG00000037506.6_4
ENSG00000143751.10_3	SDE2	-0.0655995	0.340755	0.474214	0	31.585	30.5036	28.2472	29.0766	29.7933	27.4283	7.92199	7.65076	7.08483	7.29285	7.4726	6.87943	protein_coding	HGNC:26643	OTTHUMG00000037504.3_3
ENSG00000163041.11_4	H3F3A	-0.325145	0.000583752	0.00528194	0	38.4623	37.5728	34.9896	28.3171	30.3714	29.9218	10.0845	9.85129	9.17398	7.42451	7.96313	7.84525	protein_coding	HGNC:4764	OTTHUMG00000037507.3_4
ENSG00000182827.9_3	ACBD3	0.10373	0.162305	0.275779	0	50.9043	48.3344	44.7752	48.6882	54.5487	51.4914	14.1834	13.4674	12.4757	13.566	15.1989	14.347	protein_coding	HGNC:15453	OTTHUMG00000037560.3_3
ENSG00000183814.15_2	LIN9	-0.299815	0.0388893	0.0974942	0	16.0668	13.3036	12.3582	12.4252	11.6241	9.81175	3.61702	2.99495	2.78212	2.79722	2.61687	2.20886	protein_coding	HGNC:30830	OTTHUMG00000037557.4_2
ENSG00000143799.13_3	PARP1	-0.142018	0.0289997	0.0788609	0	414.171	405.638	422.582	388.883	371.993	365.042	57.6598	56.472	58.8308	54.1393	51.7879	50.8202	protein_coding	HGNC:270	OTTHUMG00000037556.4_3
ENSG00000143772.9_3	ITPKB	0.0900983	0.171903	0.287164	0	65.1489	62.4544	62.7828	72.0975	67.391	63.1479	9.25936	8.8764	8.92309	10.2469	9.57803	8.97497	protein_coding	HGNC:6179	OTTHUMG00000037582.1_3
ENSG00000143801.17_7	PSEN2	0.172794	0.0126513	0.0433319	0	21.024	21.7087	21.9925	24.3441	24.2186	24.4077	5.68369	5.86881	5.94552	6.58127	6.54735	6.59847	protein_coding	HGNC:9509	OTTHUMG00000037563.7_7
ENSG00000163050.17_5	COQ8A	0.363382	0.00356566	0.0180279	0	9.93398	8.21963	8.60868	11.6852	11.0667	11.6565	1.27408	1.0542	1.1041	1.49868	1.41935	1.495	protein_coding	HGNC:16812	OTTHUMG00000037621.6_5
ENSG00000143776.18_6	CDC42BPA	-0.126852	0.0700603	0.149188	0	146.933	139.53	135.503	130.387	120.474	135.56	10.4541	9.92741	9.64089	9.27692	8.5716	9.64498	protein_coding	HGNC:1737	OTTHUMG00000037618.3_6
ENSG00000181450.17_3	ZNF678	-0.518927	0.000690446	0.00590768	0	16.4783	14.3612	13.5015	11.1204	9.41492	10.3794	1.84837	1.6109	1.51447	1.24738	1.05608	1.16426	protein_coding	HGNC:28652	OTTHUMG00000037700.4_3
ENSG00000143740.14_5	SNAP47	-0.051044	0.361019	0.494809	0	51.4137	53.6224	55.0148	49.7788	52.7318	51.9982	7.81364	8.14931	8.36092	7.56517	8.01395	7.90246	protein_coding	HGNC:30669	OTTHUMG00000037697.5_5
ENSG00000081692.12_3	JMJD4	-0.135462	0.0878494	0.175737	0	28.7439	29.446	32.2321	26.8369	29.2771	26.2322	6.66139	6.82409	7.46978	6.21945	6.78496	6.07931	protein_coding	HGNC:25724	OTTHUMG00000037698.3_3
ENSG00000286389.1_1	AL731702.1	0.0842098	0.724156	0.810593	0	1.68505	1.07616	0.992016	1.4996	1.25945	1.19606	0.39297	0.25097	0.231347	0.349719	0.293715	0.278932	lncRNA	NA	OTTHUMG00000195694.1_1
ENSG00000143816.8_3	WNT9A	0.152563	0.328901	0.461096	0	22.2976	14.6951	16.0068	21.3839	18.706	18.7518	5.56743	3.6692	3.9967	5.33929	4.67065	4.68209	protein_coding	HGNC:12778	OTTHUMG00000037592.2_3
ENSG00000143761.16_4	ARF1	0.031981	0.602211	0.711793	0	431.628	452.247	456.378	444.465	481.503	444.346	131.554	137.838	139.097	135.466	146.755	135.43	protein_coding	HGNC:652	OTTHUMG00000037595.4_4
ENSG00000143793.13_3	C1orf35	0.132638	0.0481962	0.11417	0	20.3578	21.1521	20.5633	23.4482	22.4017	22.1981	4.72558	4.90996	4.77329	5.44295	5.20003	5.15275	protein_coding	HGNC:19032	OTTHUMG00000037793.3_3
ENSG00000162910.19_5	MRPL55	0.21257	0.0128944	0.0439664	0	24.3353	25.4196	27.457	31.4331	28.988	29.0703	12.9031	13.4781	14.5583	16.6666	15.3701	15.4138	protein_coding	HGNC:16686	OTTHUMG00000037965.11_5
ENSG00000143774.16_3	GUK1	0.072882	0.249119	0.376168	0	111.174	114.407	120.572	119.676	128.629	115.815	23.529	24.2131	25.5179	25.3282	27.2231	24.5111	protein_coding	HGNC:4693	OTTHUMG00000039503.6_3
ENSG00000198835.4_3	GJC2	0.050996	0.823775	0.885412	0	0.744559	1.18749	1.12653	1.05167	1.21816	0.912249	0.343907	0.548493	0.520336	0.485758	0.56266	0.421362	protein_coding	HGNC:17494	OTTHUMG00000039771.2_3
ENSG00000181873.13_3	IBA57	0.190963	0.0675186	0.145635	0	7.89624	8.42373	8.3901	10.3024	9.24974	8.65623	0.771871	0.823434	0.820147	1.00708	0.904178	0.846161	protein_coding	HGNC:27302	OTTHUMG00000039769.3_3
ENSG00000162913.10_8	OBSCN-AS1	0.703921	0.00357852	0.0180684	1	0.901308	0.927724	0.823878	1.53855	1.19751	1.58123	0.233379	0.240219	0.213329	0.398381	0.310075	0.409433	lncRNA	HGNC:32047	OTTHUMG00000039770.8_8
ENSG00000154358.21_4	OBSCN	0.104825	0.341842	0.475436	0	30.6445	37.1646	34.5692	41.9303	32.7664	35.3953	0.774848	0.939711	0.874086	1.06021	0.828501	0.894972	protein_coding	HGNC:15719	OTTHUMG00000039772.26_4
ENSG00000154370.16_4	TRIM11	0.168781	0.0333461	0.0872461	0	29.8019	31.8395	33.2241	37.7626	33.9639	34.929	3.51107	3.75112	3.91425	4.44894	4.0014	4.1151	protein_coding	HGNC:16281	OTTHUMG00000039773.7_4
ENSG00000162931.12_4	TRIM17	-0.268998	0.242191	0.36904	0	1.90058	1.79978	1.76545	1.8891	1.03234	1.6015	0.534924	0.506553	0.496891	0.531692	0.290554	0.450747	protein_coding	HGNC:13430	OTTHUMG00000039974.6_4
ENSG00000181218.5_2	HIST3H2A	0.254757	0.0760417	0.158566	0	5.68216	6.66106	6.99455	6.6216	7.86641	8.61569	6.34878	7.44252	7.81514	7.39843	8.78929	9.62646	protein_coding	HGNC:20507	OTTHUMG00000040046.1_2
ENSG00000168159.12_4	RNF187	0.231185	0.00278982	0.0151452	0	148.971	150.495	154.553	171.324	188.236	173.388	43.996	44.4464	45.6446	50.5978	55.5926	51.2074	protein_coding	HGNC:27146	OTTHUMG00000040043.6_4
ENSG00000116574.6_3	RHOU	-0.688247	0.000843072	0.00669804	-1	3.35051	3.48824	3.93444	1.98648	2.49826	2.20967	0.845022	0.879758	0.992292	0.501004	0.630077	0.557294	protein_coding	HGNC:17794	OTTHUMG00000037919.2_3
ENSG00000177788.6_7	AL162595.1	-0.135104	0.238011	0.364549	0	5.66256	6.47551	5.26273	5.23885	5.40945	5.18968	0.690809	0.789986	0.642031	0.639118	0.65993	0.63312	lncRNA	NA	OTTHUMG00000037660.2_7
ENSG00000168118.11_3	RAB4A	-0.283418	0.0133251	0.0451283	0	36.6009	38.5377	34.3675	25.9995	32.5393	31.4422	11.0577	11.6428	10.3829	7.85484	9.8306	9.49915	protein_coding	HGNC:9781	OTTHUMG00000037627.4_3
ENSG00000154429.11_3	CCSAP	-0.458553	0.00254023	0.0142172	0	24.8643	20.3914	18.4111	15.8139	14.8037	15.6704	3.97384	3.25897	2.94249	2.5274	2.36595	2.50446	protein_coding	HGNC:29578	OTTHUMG00000037663.4_3
ENSG00000143632.14_2	ACTA1	-1.24501	0.00855081	0.0328229	-1	3.01742	7.06926	7.73436	1.61645	3.28283	2.65566	2.01834	4.7286	5.17349	1.08124	2.19588	1.77636	protein_coding	HGNC:129	OTTHUMG00000038006.3_2
ENSG00000069248.12_3	NUP133	0.0584672	0.316774	0.448682	0	61.0538	64.4583	64.8341	64.7359	64.0462	69.4526	10.0401	10.5999	10.6618	10.6456	10.5322	11.4212	protein_coding	HGNC:18016	OTTHUMG00000039462.4_3
ENSG00000135776.5_3	ABCB10	-0.0775561	0.370234	0.504039	0	27.5095	23.5456	22.8332	24.1883	22.2985	23.4955	6.44552	5.51678	5.34985	5.66736	5.22458	5.50503	protein_coding	HGNC:41	OTTHUMG00000039471.2_3
ENSG00000135801.9_2	TAF5L	-0.0997209	0.0825278	0.168013	0	43.3607	41.8589	43.8	40.606	40.6741	39.1254	6.76244	6.52821	6.83095	6.33281	6.34343	6.10189	protein_coding	HGNC:17304	OTTHUMG00000039463.2_2
ENSG00000135763.10_3	URB2	0.102186	0.182968	0.299845	0	28.8419	31.2272	28.8693	34.1012	31.8786	29.4758	4.8158	5.21409	4.82039	5.69398	5.32286	4.92165	protein_coding	HGNC:28967	OTTHUMG00000039464.3_3
ENSG00000143641.10_3	GALNT2	-0.190124	0.0179513	0.0551197	0	491.017	471.377	483.364	456.189	408.744	402.302	63.6692	61.1225	62.6769	59.1532	53.001	52.1657	protein_coding	HGNC:4124	OTTHUMG00000037771.2_3
ENSG00000177614.11_5	PGBD5	-0.359684	0.12621	0.22902	0	4.54573	2.59763	2.89198	2.80444	2.49826	2.49348	0.403813	0.230757	0.256905	0.249129	0.221929	0.221505	protein_coding	HGNC:19405	OTTHUMG00000037759.6_5
ENSG00000135775.14_4	COG2	-0.159855	0.031109	0.0829046	0	24.9623	25.6423	27.272	23.7209	23.6818	22.3197	2.2805	2.34262	2.49151	2.16708	2.16351	2.03907	protein_coding	HGNC:6546	OTTHUMG00000037753.3_4
ENSG00000135744.8_4	AGT	-1.24021	2.15095e-06	0.000139384	-1	7.07331	7.27336	6.97774	3.27185	2.66343	3.08137	3.34277	3.43731	3.29761	1.54624	1.25871	1.45623	protein_coding	HGNC:333	OTTHUMG00000037757.2_4
ENSG00000119280.16_3	C1orf198	-0.285894	0.0367129	0.0934428	0	96.5967	132.312	133.35	94.8447	101.995	100.368	18.7167	25.6369	25.8381	18.3772	19.7626	19.4473	protein_coding	HGNC:25900	OTTHUMG00000037790.3_3
ENSG00000143643.13_4	TTC13	-0.0791487	0.320519	0.452593	0	21.9253	20.4841	21.7739	21.2086	18.355	21.1845	5.20544	4.86328	5.16949	5.03528	4.35778	5.02955	protein_coding	HGNC:26204	OTTHUMG00000037788.5_4
ENSG00000173409.14_4	ARV1	-0.175421	0.0272562	0.0752572	0	19.2214	17.8309	17.52	15.5802	16.4555	16.2786	9.04535	8.39099	8.24471	7.33187	7.74375	7.66051	protein_coding	HGNC:29561	OTTHUMG00000037837.7_4
ENSG00000182118.8_4	FAM89A	-0.542293	0.000469508	0.00455431	0	14.7344	12.4129	11.7192	8.6665	8.98134	9.02113	6.13423	5.16775	4.87895	3.60804	3.73911	3.75567	protein_coding	HGNC:25057	OTTHUMG00000037960.3_4
ENSG00000143633.13_5	C1orf131	-0.123948	0.174482	0.290406	0	13.7939	13.4706	16.0236	13.1069	13.6681	12.9742	2.5483	2.48856	2.9602	2.42137	2.52506	2.39686	protein_coding	HGNC:25332	OTTHUMG00000038023.4_5
ENSG00000116906.13_5	GNPAT	-0.0978693	0.128624	0.23231	0	77.7868	74.5705	75.6118	66.2355	74.7619	72.0271	23.8537	22.8674	23.1867	20.3114	22.9261	22.0874	protein_coding	HGNC:4416	OTTHUMG00000038024.4_5
ENSG00000116903.7_2	EXOC8	0.0701308	0.418972	0.550616	0	13.3825	13.0624	11.8201	14.3533	12.5326	13.258	2.62401	2.56125	2.31767	2.81437	2.45737	2.59961	protein_coding	HGNC:24659	OTTHUMG00000038025.2_2
ENSG00000010072.16_4	SPRTN	-0.134115	0.110079	0.207429	0	18.4768	16.5691	16.2422	15.3465	14.9895	16.3799	3.12848	2.80548	2.75011	2.59846	2.53802	2.77344	protein_coding	HGNC:25356	OTTHUMG00000038022.3_4
ENSG00000135766.9_3	EGLN1	-0.0862157	0.439107	0.570997	0	6.38753	6.06731	6.28837	6.66055	5.53333	5.45322	1.18705	1.12754	1.16863	1.23779	1.02831	1.01342	protein_coding	HGNC:1232	OTTHUMG00000038027.3_3
ENSG00000233461.6_6	AL445524.1	0.172417	0.466952	0.595415	0	0.862121	1.33592	1.26104	1.01271	1.42463	1.47987	0.192782	0.29873	0.281985	0.226457	0.318566	0.330919	lncRNA	NA	OTTHUMG00000039487.2_6
ENSG00000116918.15_7	TSNAX	-0.275976	0.0188268	0.0570834	0	20.2011	17.5896	15.6873	14.3728	14.5973	15.1636	3.17977	2.76871	2.46927	2.26236	2.29769	2.38684	protein_coding	HGNC:12380	OTTHUMG00000039486.5_7
ENSG00000162946.22_6	DISC1	-0.227058	0.143206	0.251645	0	3.05661	2.43064	2.50526	2.25913	2.14726	2.41239	0.236836	0.188334	0.194116	0.175045	0.166377	0.18692	protein_coding	HGNC:2888	OTTHUMG00000037835.8_6
ENSG00000116991.10_2	SIPA1L2	0.0983839	0.161329	0.2747	0	115.74	123.684	123.094	118.897	135.339	133.898	15.1472	16.1869	16.1097	15.5603	17.7123	17.5236	protein_coding	HGNC:23800	OTTHUMG00000037820.1_2
ENSG00000212916.4_2	MAP10	0.203901	0.299633	0.43057	0	1.17562	1.28026	0.992016	1.22694	1.17686	1.56096	0.334363	0.364124	0.282143	0.34896	0.334717	0.443959	protein_coding	HGNC:29265	OTTHUMG00000037819.3_2
ENSG00000135778.12_3	NTPCR	0.0254111	0.734056	0.818319	0	40.7548	43.937	46.6752	41.1513	46.4965	46.099	2.57063	2.77135	2.94406	2.59564	2.93279	2.90772	protein_coding	HGNC:28204	OTTHUMG00000037822.4_3
ENSG00000135749.19_8	PCNX2	0.0334547	0.603194	0.712825	0	36.3266	35.1422	34.4011	38.6195	34.3355	35.375	2.62722	2.54156	2.48797	2.79305	2.48322	2.5584	protein_coding	HGNC:8736	OTTHUMG00000037824.8_8
ENSG00000143674.11_5	MAP3K21	-0.017474	0.930073	0.954865	0	2.01815	2.85739	2.30349	1.8891	2.37438	2.83811	0.253536	0.358969	0.289384	0.237324	0.298288	0.356546	protein_coding	HGNC:29798	OTTHUMG00000037889.2_5
ENSG00000168275.15_3	COA6	-0.218815	0.00536518	0.0237829	0	17.5951	17.5525	17.4528	14.996	15.4025	14.7987	7.73071	7.71201	7.66817	6.58874	6.76734	6.50207	protein_coding	HGNC:18025	OTTHUMG00000037945.2_3
ENSG00000059588.10_3	TARBP1	0.253658	0.0127052	0.0434514	0	15.9492	14.8436	14.9811	19.7285	16.4968	18.3261	2.0398	1.8984	1.91599	2.52314	2.10983	2.34379	protein_coding	HGNC:11568	OTTHUMG00000037947.4_3
ENSG00000168264.10_2	IRF2BP2	-0.178721	0.0258641	0.0724374	0	61.8376	67.8537	61.2192	53.5765	54.941	60.1476	13.0901	14.3636	12.9592	11.3413	11.6302	12.7324	protein_coding	HGNC:21729	OTTHUMG00000037981.1_2
ENSG00000173726.11_3	TOMM20	-0.150328	0.0275486	0.0758187	0	192.801	189.961	179.723	160.554	171.657	174.604	56.0796	55.2533	52.2755	46.6999	49.9293	50.7866	protein_coding	HGNC:20947	OTTHUMG00000039619.2_3
ENSG00000188739.15_4	RBM34	-0.141024	0.46492	0.59383	0	1.41074	1.20604	1.00883	1.20747	1.01169	1.05415	0.480008	0.410358	0.343256	0.410843	0.34423	0.358678	protein_coding	HGNC:28965	OTTHUMG00000039620.10_4
ENSG00000054267.22_4	ARID4B	-0.147103	0.0954116	0.186579	0	51.4529	49.9301	45.8345	48.0066	40.0134	44.8827	4.6467	4.50918	4.1393	4.33546	3.6136	4.05334	protein_coding	HGNC:15550	OTTHUMG00000039621.9_4
ENSG00000152904.11_5	GGPS1	0.0211555	0.789258	0.859882	0	19.6328	20.4099	19.5881	18.5599	19.7796	22.1778	5.15433	5.35834	5.14259	4.87266	5.19286	5.82247	protein_coding	HGNC:4249	OTTHUMG00000037963.3_5
ENSG00000285053.1_3	TBCE	-0.429017	0.00182366	0.0112522	0	5.70175	6.21575	6.13705	4.69354	4.43905	4.27743	1.09987	1.19903	1.18384	0.90539	0.856299	0.825122	protein_coding	HGNC:11582	OTTHUMG00000192486.7_3
ENSG00000284770.2_3	TBCE	0.281478	0.383895	0.517364	0	0.626997	1.09471	0.672553	1.16852	0.619403	1.11497	0.0503936	0.0879854	0.0540551	0.0939172	0.0497832	0.0896135	protein_coding	HGNC:11582	OTTHUMG00000039987.14_3
ENSG00000162885.13_3	B3GALNT2	-0.314058	0.000352614	0.00371727	0	48.1024	44.3267	44.9434	37.5094	36.5447	36.4291	5.72239	5.27322	5.34658	4.46222	4.34746	4.33371	protein_coding	HGNC:28596	OTTHUMG00000040468.6_3
ENSG00000168243.11_3	GNG4	-2.13761	3.00442e-07	4.23499e-05	-1	15.1263	11.5409	11.5847	3.11605	2.47761	3.08137	2.91226	2.22196	2.23041	0.599932	0.477014	0.593257	protein_coding	HGNC:4407	OTTHUMG00000040740.4_3
ENSG00000143669.13_3	LYST	-0.0245134	0.835103	0.893596	0	41.4798	58.4095	51.1813	48.5129	47.1985	52.8496	2.1148	2.97795	2.60943	2.47338	2.40637	2.69449	protein_coding	HGNC:1968	OTTHUMG00000040527.11_3
ENSG00000116962.15_3	NID1	0.247775	0.00136245	0.00929579	0	195.603	210.835	207.617	242.078	239.812	247.24	33.6609	36.282	35.7283	41.6585	41.2686	42.5469	protein_coding	HGNC:7821	OTTHUMG00000040071.3_3
ENSG00000077585.14_5	GPR137B	0.413271	0.000337651	0.0036066	0	13.0102	12.9881	13.098	16.0087	18.1278	17.9409	5.63944	5.62988	5.67749	6.93918	7.85776	7.77672	protein_coding	HGNC:11862	OTTHUMG00000037994.4_5
ENSG00000086619.13_2	ERO1B	-0.181261	0.306466	0.438088	0	2.41002	2.0781	2.11854	2.29808	1.5898	1.92586	0.449546	0.387633	0.395177	0.428667	0.296549	0.359235	protein_coding	HGNC:14355	OTTHUMG00000039955.3_2
ENSG00000116977.18_3	LGALS8	-0.0394698	0.69665	0.789301	0	21.7294	18.0721	17.1837	19.6116	18.4788	17.3125	2.23783	1.86118	1.76969	2.01973	1.90307	1.78295	protein_coding	HGNC:6569	OTTHUMG00000039953.10_3
ENSG00000119285.11_4	HEATR1	0.175868	0.0448478	0.108169	0	45.614	55.181	52.7618	57.939	56.2005	59.357	5.0341	6.08995	5.82296	6.39433	6.20246	6.55082	protein_coding	HGNC:25517	OTTHUMG00000040061.4_4
ENSG00000116984.13_5	MTR	0.143251	0.124684	0.226885	0	27.5487	31.9879	29.9622	34.4518	29.5661	34.8276	2.2294	2.58865	2.42472	2.78804	2.39266	2.81845	protein_coding	HGNC:7468	OTTHUMG00000040060.7_5
ENSG00000198626.17_4	RYR2	1.90515	1.27355e-06	9.78851e-05	1	0.705371	0.593743	0.638926	2.25913	2.60149	2.41239	0.0395055	0.0332536	0.0357841	0.126527	0.145701	0.13511	protein_coding	HGNC:10484	OTTHUMG00000039543.5_4
ENSG00000133019.11_4	CHRM3	0.961676	0.000144193	0.00203089	1	35.4645	26.2731	25.4393	66.4886	50.5432	52.5861	2.91409	2.15884	2.09033	5.46332	4.1531	4.32096	protein_coding	HGNC:1952	OTTHUMG00000039649.5_4
ENSG00000155816.20_4	FMN2	-0.9255	5.40979e-06	0.000240156	-1	8.69958	7.73722	8.03701	4.22614	4.31517	4.33825	0.89816	0.798804	0.829755	0.436314	0.445506	0.447889	protein_coding	HGNC:14074	OTTHUMG00000039883.6_4
ENSG00000091483.6_2	FH	-0.151337	0.055149	0.126046	0	76.2193	74.3478	81.2949	63.5479	73.0689	72.1893	35.5832	34.7095	37.9528	29.6675	34.1124	33.7018	protein_coding	HGNC:3700	OTTHUMG00000039597.3_2
ENSG00000054277.14_4	OPN3	0.0672562	0.449259	0.580138	0	10.2279	10.2421	8.86089	10.0687	10.5092	10.1361	2.74648	2.75029	2.3794	2.70374	2.82202	2.72183	protein_coding	HGNC:14007	OTTHUMG00000039691.5_4
ENSG00000203668.2_6	CHML	-0.35494	0.00920729	0.0344813	0	25.0799	23.6755	20.4456	18.3068	15.8154	19.9478	3.27371	3.09039	2.66879	2.38961	2.06441	2.60382	protein_coding	HGNC:1941	OTTHUMG00000039690.3_6
ENSG00000174371.17_4	EXO1	-0.0751702	0.452145	0.583059	0	24.3157	20.8738	20.3111	22.9614	19.1602	20.0087	5.87762	5.04563	4.90962	5.55025	4.63142	4.83652	protein_coding	HGNC:3511	OTTHUMG00000039965.9_4
ENSG00000180287.16_3	PLD5	0.0898464	0.645919	0.749016	0	9.77723	12.3944	13.367	9.05601	13.792	15.042	1.02433	1.29852	1.40042	0.94877	1.44495	1.5759	protein_coding	HGNC:26879	OTTHUMG00000039867.3_3
ENSG00000143702.16_5	CEP170	-0.207644	0.00658439	0.0275653	0	68.519	68.7258	66.4987	61.3472	54.7758	60.2895	6.26373	6.28264	6.07905	5.60811	5.00739	5.51143	protein_coding	HGNC:28920	OTTHUMG00000039862.6_5
ENSG00000054282.16_3	SDCCAG8	-0.114969	0.139675	0.246774	0	24.4333	21.1336	23.7075	20.7607	21.7204	21.4885	4.59186	3.97173	4.45546	3.90165	4.08201	4.03844	protein_coding	HGNC:10671	OTTHUMG00000039996.4_3
ENSG00000117020.17_4	AKT3	-0.377891	0.000623316	0.00550556	0	79.1583	93.7929	85.801	63.3726	66.2967	69.4728	8.35444	9.89899	9.05551	6.6884	6.99701	7.33223	protein_coding	HGNC:393	OTTHUMG00000039994.7_4
ENSG00000179456.10_2	ZBTB18	-0.903487	1.20153e-05	0.00040365	-1	68.9892	84.6084	78.033	36.1851	43.3375	44.3353	17.6624	21.6611	19.9777	9.26397	11.0951	11.3506	protein_coding	HGNC:13030	OTTHUMG00000040013.2_2
ENSG00000035687.10_4	ADSS	-0.234421	0.00889738	0.0337365	0	84.5858	73.8097	71.442	64.8138	66.2761	64.2426	24.5817	21.4501	20.762	18.8357	19.2607	18.6697	protein_coding	HGNC:292	OTTHUMG00000040102.3_4
ENSG00000121644.19_3	DESI2	-0.0870792	0.704798	0.795961	0	149.891	86.2412	78.1675	111.379	89.545	94.7725	30.367	17.4719	15.8362	22.5647	18.1412	19.2003	protein_coding	HGNC:24264	OTTHUMG00000040398.3_3
ENSG00000203667.10_3	COX20	-0.264095	0.00215843	0.0127098	0	76.6699	69.5422	68.0288	58.1532	58.7813	61.445	16.7768	15.2171	14.8859	12.725	12.8624	13.4453	protein_coding	HGNC:26970	OTTHUMG00000040401.2_3
ENSG00000153187.20_6	HNRNPU	-0.142044	0.0463571	0.111005	0	527.285	572.944	561.212	490.427	489.844	525.395	23.4224	25.4506	24.9295	21.7851	21.7592	23.3384	protein_coding	HGNC:5048	OTTHUMG00000040396.17_6
ENSG00000203666.12_2	EFCAB2	-0.122193	0.150042	0.260676	0	9.09145	9.7411	10.0042	8.70545	8.98134	8.81841	1.05629	1.13177	1.16234	1.01144	1.04349	1.02456	protein_coding	HGNC:28166	OTTHUMG00000040474.4_2
ENSG00000162849.16_5	KIF26B	0.539661	0.000387884	0.00395492	0	37.3259	33.8063	34.4179	59.0491	47.4049	46.9301	2.59136	2.34701	2.38947	4.09949	3.2911	3.25813	protein_coding	HGNC:25484	OTTHUMG00000040079.4_5
ENSG00000185420.19_5	SMYD3	0.0796216	0.215812	0.338356	0	16.1452	16.4022	17.1165	17.4499	17.4672	17.576	2.75233	2.79614	2.91791	2.97475	2.97769	2.99625	protein_coding	HGNC:15513	OTTHUMG00000040508.8_5
ENSG00000162851.8_3	TFB2M	0.193558	0.0497496	0.11682	0	10.7961	13.118	12.3414	14.0222	13.792	13.6635	6.05163	7.35315	6.9178	7.85998	7.73096	7.65889	protein_coding	HGNC:18559	OTTHUMG00000040091.3_3
ENSG00000162852.14_4	CNST	-0.260552	0.00165933	0.0105673	0	26.0791	24.863	25.5738	22.0071	21.039	20.8196	4.39561	4.19063	4.31044	3.70927	3.5461	3.50911	protein_coding	HGNC:26486	OTTHUMG00000040090.4_4
ENSG00000143653.10_3	SCCPDH	-0.0803529	0.146788	0.25649	0	80.0009	75.5909	75.7463	73.3245	74.638	70.8311	37.3661	35.3064	35.3789	34.2478	34.8613	33.0832	protein_coding	HGNC:24275	OTTHUMG00000040221.3_3
ENSG00000260855.1_6	AL591848.4	0.0135054	0.964006	0.977092	0	1.03846	0.927724	0.975202	1.26589	0.536816	1.15552	0.299097	0.267202	0.280876	0.364601	0.154613	0.33281	lncRNA	NA	OTTHUMG00000176476.1_6
ENSG00000153207.15_4	AHCTF1	0.0963788	0.121358	0.222638	0	42.8905	41.3023	40.9585	46.468	42.3465	44.9637	4.46869	4.30322	4.2674	4.84143	4.41201	4.6847	protein_coding	HGNC:24618	OTTHUMG00000040706.4_4
ENSG00000197472.15_4	ZNF695	-0.245726	0.0994215	0.192385	0	1.93977	1.79978	1.86634	1.6554	1.54851	1.52042	0.516446	0.479176	0.496894	0.440735	0.412275	0.404796	protein_coding	HGNC:30954	OTTHUMG00000040707.7_4
ENSG00000277462.2_4	ZNF670	-0.406633	0.00856718	0.0328397	0	8.38608	7.31046	6.72553	5.88154	6.02885	4.98696	1.99811	1.74183	1.60246	1.40137	1.43647	1.18822	protein_coding	HGNC:28167	OTTHUMG00000040868.4_4
ENSG00000188295.14_2	ZNF669	-0.17962	0.0738548	0.154999	0	8.05299	7.36613	7.98657	6.6995	6.64825	7.31827	4.06717	3.72027	4.03362	3.38359	3.3577	3.69609	protein_coding	HGNC:25736	OTTHUMG00000040869.6_2
ENSG00000196418.12_4	ZNF124	-0.309155	0.0255496	0.0717329	0	5.545	6.04876	6.15386	5.00515	4.15	5.16941	1.22759	1.33911	1.36238	1.10807	0.918751	1.14443	protein_coding	HGNC:12907	OTTHUMG00000041112.3_4
ENSG00000259865.1_6	AL390728.6	-0.229065	0.59015	0.701601	0	2.39043	1.28026	0.722995	1.63592	0.908457	1.15552	1.91848	1.0275	0.580253	1.31294	0.729099	0.92738	lncRNA	NA	OTTHUMG00000176477.1_6
ENSG00000227671.4_5	AL390728.4	0.122416	0.601719	0.711365	0	23.7279	19.7234	16.1749	29.1545	15.0928	20.5357	10.9851	9.13121	7.48838	13.4975	6.9874	9.50729	transcribed_unprocessed_pseudogene	NA	OTTHUMG00000041115.3_5
ENSG00000162714.12_3	ZNF496	0.0273992	0.609778	0.718254	0	68.8129	70.1916	68.8358	74.2593	68.6504	68.9052	6.53432	6.66524	6.53649	7.05149	6.51889	6.54308	protein_coding	HGNC:23713	OTTHUMG00000041164.3_3
ENSG00000162722.9_3	TRIM58	0.339302	0.0747493	0.156492	0	3.17417	2.20798	2.48845	3.05762	3.09701	3.7909	0.61396	0.427076	0.481324	0.591416	0.599035	0.73325	protein_coding	HGNC:24150	OTTHUMG00000040203.2_3
ENSG00000175137.11_3	SH3BP5L	0.308637	0.000357646	0.00374147	0	52.8637	56.2943	58.0918	69.3125	69.9512	67.9119	9.23544	9.83478	10.1488	12.1091	12.2207	11.8644	protein_coding	HGNC:29360	OTTHUMG00000040389.3_3
ENSG00000171161.13_4	ZNF672	0.119919	0.0678178	0.146039	0	38.3056	37.4058	40.7063	41.9303	43.7711	40.8282	10.2394	9.99889	10.8811	11.2083	11.7004	10.9137	protein_coding	HGNC:26179	OTTHUMG00000040377.4_4
ENSG00000171163.15_3	ZNF692	0.380373	0.0309899	0.0826912	0	32.5646	34.9195	30.9711	52.2522	32.7664	43.0784	8.28828	8.88764	7.88269	13.2991	8.33963	10.9642	protein_coding	HGNC:26049	OTTHUMG00000040423.3_3
ENSG00000185220.12_4	PGBD2	0.150976	0.282689	0.412407	0	7.64152	6.79094	6.4397	9.19234	6.99925	6.95337	2.09299	1.86002	1.76382	2.51776	1.91708	1.90451	protein_coding	HGNC:19399	OTTHUMG00000040424.2_4
ENSG00000035115.21_5	SH3YL1	0.0855545	0.303735	0.43482	0	23.6495	23.2859	21.4208	25.9216	21.9475	24.6307	2.11818	2.08561	1.91857	2.32168	1.96574	2.20607	protein_coding	HGNC:29546	OTTHUMG00000151359.8_5
ENSG00000143727.16_3	ACP1	-0.110172	0.0641368	0.140513	0	96.1068	93.4218	89.5168	83.0621	88.2855	87.1705	23.1026	22.4572	21.5185	19.9669	21.2225	20.9544	protein_coding	HGNC:122	OTTHUMG00000086933.6_3
ENSG00000151353.15_5	TMEM18	-0.00229676	0.967766	0.979046	0	28.7047	27.3307	29.2392	28.8429	28.1415	28.1581	3.38938	3.22715	3.4525	3.4057	3.32289	3.32484	protein_coding	HGNC:25257	OTTHUMG00000151381.2_5
ENSG00000130508.11_4	PXDN	0.856154	4.89964e-05	0.0010069	1	12.6183	9.75966	9.76883	20.7607	17.9627	19.4005	1.12003	0.866293	0.867108	1.84277	1.59441	1.72204	protein_coding	HGNC:14966	OTTHUMG00000059697.5_4
ENSG00000032389.12_8	EIPR1	-0.0363917	0.653307	0.755474	0	35.4841	38.8531	40.4709	34.8023	40.8806	36.3075	6.14443	6.72781	7.00795	6.02638	7.07889	6.28702	protein_coding	HGNC:12383	OTTHUMG00000090329.4_8
ENSG00000171853.16_6	TRAPPC12	0.0875276	0.223642	0.347404	0	30.762	28.444	32.787	33.0301	31.4863	33.2464	3.34624	3.0941	3.56651	3.59296	3.42503	3.61649	protein_coding	HGNC:24284	OTTHUMG00000090328.5_6
ENSG00000182551.14_3	ADI1	-0.599063	3.93397e-05	0.000873201	-1	63.699	61.5638	62.0262	37.1588	45.7532	40.7471	11.9063	11.5072	11.5937	6.94558	8.552	7.61629	protein_coding	HGNC:30576	OTTHUMG00000112441.7_3
ENSG00000171865.10_4	RNASEH1	-0.0610843	0.338568	0.471662	0	39.9514	42.063	37.2594	37.6068	37.7216	38.9834	6.72018	7.07536	6.26736	6.32578	6.3451	6.55735	protein_coding	HGNC:18466	OTTHUMG00000090279.3_4
ENSG00000234171.3_6	RNASEH1-AS1	-0.0402541	0.646115	0.74918	0	6.36794	6.4384	6.52377	6.01786	6.29726	6.4871	1.45486	1.47096	1.49047	1.37488	1.43872	1.48209	lncRNA	HGNC:49289	OTTHUMG00000151419.4_6
ENSG00000171863.15_5	RPS7	0.0673272	0.338147	0.471255	0	347.474	382.946	393.763	385.766	411.263	380.894	62.8457	69.2613	71.2178	69.7715	74.3828	68.8903	protein_coding	HGNC:10440	OTTHUMG00000090305.7_5
ENSG00000176887.7_4	SOX11	0.0226791	0.780323	0.853466	0	50.2577	54.7914	47.0955	48.6103	49.5935	56.3365	5.58295	6.08658	5.23167	5.39995	5.50916	6.25821	protein_coding	HGNC:11191	OTTHUMG00000090333.2_4
ENSG00000232044.7_6	SILC1	-0.453688	0.0415331	0.102247	0	0.940495	0.797843	0.907947	0.720586	0.640049	0.567622	0.0410356	0.0348114	0.0396155	0.0314405	0.0279266	0.0247664	lncRNA	HGNC:26403	OTTHUMG00000151462.19_6
ENSG00000151692.15_3	RNF144A	-0.31904	0.00217986	0.0127864	0	24.1982	21.8943	22.9172	17.2551	19.8002	18.2653	3.75165	3.39446	3.55306	2.67521	3.0698	2.83182	protein_coding	HGNC:20457	OTTHUMG00000090353.8_3
ENSG00000235092.6_6	ID2-AS1	0.481306	0.0309258	0.0825552	0	0.783746	0.983387	0.739808	1.22694	1.03234	1.2366	0.110636	0.138818	0.104434	0.173199	0.145728	0.174563	lncRNA	HGNC:51103	OTTHUMG00000151625.3_6
ENSG00000115738.10_3	ID2	-1.29457	1.01696e-08	6.62139e-06	-1	56.2142	59.764	58.5289	22.4161	24.3838	24.3469	25.4018	27.0059	26.4478	10.1293	11.0184	11.0018	protein_coding	HGNC:5361	OTTHUMG00000112454.5_3
ENSG00000134313.15_6	KIDINS220	-0.0420075	0.431369	0.563172	0	131.219	136.932	137.621	134.263	126.296	133.574	8.54177	8.91369	8.95855	8.73992	8.22134	8.69506	protein_coding	HGNC:29508	OTTHUMG00000151658.5_6
ENSG00000143797.12_5	MBOAT2	-0.0293201	0.712867	0.801961	0	71.7519	64.5696	58.5962	62.1846	62.25	66.5131	8.25304	7.42691	6.73984	7.15259	7.16011	7.65046	protein_coding	HGNC:25193	OTTHUMG00000090363.5_5
ENSG00000151693.11_5	ASAP2	-0.019097	0.867471	0.915902	0	38.3448	30.0397	28.6844	34.4518	30.5778	30.6921	5.28383	4.13941	3.95265	4.74739	4.21356	4.22931	protein_coding	HGNC:2721	OTTHUMG00000117485.4_5
ENSG00000119185.12_4	ITGB1BP1	0.251272	0.00119498	0.00845268	0	47.9457	45.7368	47.6672	53.8492	57.3154	57.0865	7.17964	6.84888	7.13795	8.06367	8.58272	8.54845	protein_coding	HGNC:23927	OTTHUMG00000090414.8_4
ENSG00000119203.14_3	CPSF3	-0.0791521	0.154205	0.266117	0	56.4101	55.0882	56.3768	51.1226	52.9796	54.816	15.3039	14.9453	15.2948	13.8694	14.3732	14.8714	protein_coding	HGNC:2326	OTTHUMG00000090415.5_3
ENSG00000134330.18_4	IAH1	-0.00403846	0.943485	0.962864	0	50.532	50.8022	52.2574	48.2598	53.2273	51.6941	8.55315	8.59888	8.84519	8.16854	9.00936	8.74985	protein_coding	HGNC:27696	OTTHUMG00000159076.3_4
ENSG00000151694.14_5	ADAM17	0.0651014	0.231611	0.356704	0	105.864	98.3944	100.345	105.77	103.998	108.882	9.86805	9.17174	9.35355	9.85927	9.69404	10.1493	protein_coding	HGNC:195	OTTHUMG00000090425.12_5
ENSG00000134308.14_4	YWHAQ	-0.204901	0.0141971	0.0471388	0	659.503	593.669	578.749	514.303	539.293	535.754	244.17	219.796	214.272	190.412	199.664	198.354	protein_coding	HGNC:12854	OTTHUMG00000013848.7_4
ENSG00000115750.17_4	TAF1B	0.00847957	0.883152	0.925455	0	20.1815	19.3894	19.7394	19.8064	19.8828	19.9681	5.0771	4.87784	4.9659	4.98273	5.00197	5.02343	protein_coding	HGNC:11533	OTTHUMG00000151673.5_4
ENSG00000269973.1_6	AC010969.2	0.0278434	0.886002	0.92733	0	3.03702	1.96677	2.20261	2.78497	2.27114	2.27049	0.939961	0.60872	0.681712	0.861952	0.702922	0.702719	lncRNA	NA	OTTHUMG00000183966.2_6
ENSG00000134317.18_3	GRHL1	0.122728	0.371674	0.505411	0	4.70248	3.67379	3.79993	4.77145	4.1087	4.35852	0.591358	0.461995	0.477858	0.600031	0.516688	0.548104	protein_coding	HGNC:17923	OTTHUMG00000151704.8_3
ENSG00000260077.1_6	AC104794.2	-0.0981603	0.540595	0.659361	0	3.01742	3.56246	2.89198	2.78497	3.4893	2.57457	1.91948	2.2662	1.83968	1.77161	2.21966	1.63777	lncRNA	NA	OTTHUMG00000175729.1_6
ENSG00000172059.11_3	KLF11	-0.0469519	0.461533	0.591399	0	21.6314	22.5622	20.5969	21.1696	21.0597	20.4749	4.70862	4.91124	4.48344	4.60811	4.58417	4.45688	protein_coding	HGNC:11811	OTTHUMG00000119004.6_3
ENSG00000205795.4_2	CYS1	-0.0830556	0.641403	0.74536	0	3.40929	2.63474	2.90879	2.60969	3.44801	2.39212	1.1975	0.925443	1.0217	0.916645	1.2111	0.840225	protein_coding	HGNC:18525	OTTHUMG00000151703.1_2
ENSG00000171848.15_5	RRM2	-0.438101	0.00106867	0.0078083	0	192.821	155.672	162.607	135.957	121.981	119.261	21.0618	17.0041	17.7615	14.8506	13.324	13.0269	protein_coding	HGNC:10452	OTTHUMG00000185555.7_5
ENSG00000115756.13_4	HPCAL1	-0.0874785	0.343934	0.477512	0	66.7556	58.929	61.0174	65.8654	56.9231	52.8902	10.7032	9.4483	9.78313	10.5604	9.12668	8.48007	protein_coding	HGNC:5145	OTTHUMG00000090451.6_4
ENSG00000115758.13_6	ODC1	-0.0114814	0.871509	0.918039	0	278.7	303.236	317.563	280.97	313.438	298.001	99.8567	108.648	113.781	100.67	112.303	106.772	protein_coding	HGNC:8109	OTTHUMG00000090450.5_6
ENSG00000115761.16_3	NOL10	0.0823261	0.199555	0.319311	0	35.6408	31.9323	33.2073	34.9387	36.1112	35.6385	9.29115	8.32436	8.65676	9.1081	9.41376	9.29055	protein_coding	HGNC:25862	OTTHUMG00000119023.3_3
ENSG00000272275.1_6	AC092687.3	0.0161513	0.949195	0.966801	0	0.587809	1.09471	0.992016	0.837437	0.88781	0.993338	1.4957	2.78553	2.52421	2.13088	2.25906	2.52758	lncRNA	NA	OTTHUMG00000185558.1_6
ENSG00000143870.12_3	PDIA6	-0.238896	0.00237918	0.0135827	0	629.309	593.298	595.142	500.768	521.578	517.995	153.453	144.672	145.121	122.109	127.183	126.31	protein_coding	HGNC:30168	OTTHUMG00000090479.6_3
ENSG00000162975.5_4	KCNF1	-0.764161	0.0059136	0.0255876	-1	20.5341	13.9344	13.7705	12.211	8.63034	7.50071	8.95905	6.07959	6.00808	5.32766	3.76542	3.27256	protein_coding	HGNC:6246	OTTHUMG00000119054.2_4
ENSG00000150873.11_2	C2orf50	-0.0197284	0.964863	0.977373	0	1.62627	0.686516	0.453973	1.12957	0.76393	0.790616	0.553531	0.233668	0.154518	0.384468	0.260017	0.2691	protein_coding	HGNC:26324	OTTHUMG00000119057.2_2
ENSG00000162976.13_3	PQLC3	0.221511	0.337849	0.471032	0	36.7577	20.2058	20.1598	33.2054	28.2654	28.3	16.1857	8.89733	8.87705	14.6215	12.4462	12.4615	protein_coding	HGNC:28503	OTTHUMG00000119055.6_3
ENSG00000134318.14_4	ROCK2	-0.224607	0.0132543	0.044976	0	109.215	98.3944	96.3264	92.5076	80.13	87.434	10.7095	9.6484	9.44562	9.07115	7.85743	8.57364	protein_coding	HGNC:10252	OTTHUMG00000149916.8_4
ENSG00000169016.17_4	E2F6	-0.0637223	0.346965	0.480799	0	18.0066	19.6863	17.9067	17.8004	17.7356	17.6571	4.42748	4.8405	4.40293	4.37679	4.36085	4.34155	protein_coding	HGNC:3120	OTTHUMG00000090565.6_4
ENSG00000196208.14_3	GREB1	-0.564827	0.00088896	0.00695352	0	6.13281	5.73333	5.93528	4.51827	3.61318	3.89226	0.493309	0.461176	0.47742	0.363438	0.290636	0.313084	protein_coding	HGNC:24885	OTTHUMG00000141276.8_3
ENSG00000134324.11_5	LPIN1	0.166918	0.0385689	0.0969158	0	86.31	101.474	97.6883	105.576	103.874	111.071	7.27679	8.5553	8.2361	8.90107	8.75759	9.36442	protein_coding	HGNC:13345	OTTHUMG00000119082.12_5
ENSG00000071575.11_2	TRIB2	0.690012	0.00822409	0.0319545	1	182.985	111.884	109.744	258.885	197.486	196.154	39.8834	24.3861	23.9198	56.4265	43.0441	42.7537	protein_coding	HGNC:30809	OTTHUMG00000090575.4_2
ENSG00000151779.13_4	NBAS	0.296434	0.000573958	0.00522485	0	43.2236	44.9575	43.4806	53.9271	51.3278	56.4378	4.83107	5.02487	4.85979	6.02739	5.73688	6.30802	protein_coding	HGNC:15625	OTTHUMG00000121153.3_4
ENSG00000079785.15_4	DDX1	-0.113344	0.0595517	0.133243	0	144.601	145.133	154.502	132.705	139.51	138.479	37.7253	37.8641	40.3084	34.6216	36.3971	36.1282	protein_coding	HGNC:2734	OTTHUMG00000090593.6_4
ENSG00000134323.12_3	MYCN	-1.17385	1.17567e-05	0.000397895	-1	2.70392	2.6904	2.74065	1.16852	1.19751	1.2366	1.03361	1.02844	1.04765	0.446681	0.457764	0.472708	protein_coding	HGNC:7559	OTTHUMG00000039579.4_3
ENSG00000163029.16_3	SMC6	0.0857386	0.143547	0.252125	0	45.9863	42.397	43.3797	47.1107	45.8564	46.8491	4.68102	4.31565	4.41568	4.79547	4.6678	4.76884	protein_coding	HGNC:20466	OTTHUMG00000090675.7_3
ENSG00000178295.15_4	GEN1	-0.165332	0.325441	0.457511	0	26.0204	21.2634	17.4359	22.2018	16.0425	19.3802	2.19915	1.79711	1.47363	1.87642	1.35586	1.63795	protein_coding	HGNC:26881	OTTHUMG00000121173.6_4
ENSG00000170745.12_4	KCNS3	0.209379	0.0730484	0.153707	0	23.4144	24.863	24.6154	23.4093	30.454	30.4488	7.48543	7.94853	7.86939	7.48379	9.73592	9.73429	protein_coding	HGNC:6302	OTTHUMG00000044150.7_4
ENSG00000240857.2_4	RDH14	0.0950225	0.245658	0.372588	0	11.7954	10.8729	11.6688	12.5031	12.7184	11.4538	7.43719	6.85556	7.35738	7.88344	8.01917	7.22181	protein_coding	HGNC:19979	OTTHUMG00000090705.3_4
ENSG00000143867.7_3	OSR1	0.609642	0.0276372	0.0760023	0	27.8426	15.66	15.6369	36.5356	26.655	26.8607	5.27421	2.96647	2.96209	6.92094	5.04924	5.08821	protein_coding	HGNC:8111	OTTHUMG00000088793.3_3
ENSG00000183891.6_3	TTC32	-0.143622	0.178516	0.294825	0	9.03267	8.18253	7.56622	7.75116	6.95796	7.70344	4.52766	4.10152	3.79259	3.8853	3.4877	3.86137	protein_coding	HGNC:32954	OTTHUMG00000151776.3_3
ENSG00000118965.14_3	WDR35	0.147678	0.0585303	0.131539	0	36.4834	36.0885	33.779	39.2427	36.4828	42.0648	4.65587	4.60547	4.31074	5.008	4.65579	5.36815	protein_coding	HGNC:29250	OTTHUMG00000090737.3_3
ENSG00000132031.13_3	MATN3	0.146934	0.165791	0.279549	0	11.2468	10.1122	8.92814	11.1983	11.5622	10.7443	3.56927	3.2092	2.83343	3.55388	3.66937	3.4098	protein_coding	HGNC:6909	OTTHUMG00000151788.2_3
ENSG00000068697.7_3	LAPTM4A	-0.329331	0.000389962	0.00397017	0	305.132	286.722	281.262	221.999	233.473	239.435	197.369	185.461	181.929	143.596	151.018	154.874	protein_coding	HGNC:6924	OTTHUMG00000090750.3_3
ENSG00000115884.11_3	SDC1	0.558502	2.3552e-05	0.000637051	0	111.821	95.6298	100.631	150.856	156.007	146.832	30.9496	26.4682	27.8524	41.7536	43.1793	40.6398	protein_coding	HGNC:10658	OTTHUMG00000090751.5_3
ENSG00000055917.15_5	PUM2	-0.205136	0.00676029	0.0280101	0	98.7324	95.9267	87.7009	80.1992	81.4101	83.2985	14.1491	13.747	12.5682	11.4932	11.6667	11.9373	protein_coding	HGNC:14958	OTTHUMG00000122098.4_5
ENSG00000143878.9_2	RHOB	-0.130733	0.469372	0.597553	0	68.519	108.859	110.484	75.8562	93.8601	93.3332	28.8866	45.8934	46.5783	31.9799	39.57	39.3479	protein_coding	HGNC:668	OTTHUMG00000090755.3_2
ENSG00000118960.13_5	HS1BP3	0.441544	0.00104765	0.0077077	0	27.2352	33.4352	33.7117	40.0022	44.6796	43.565	1.86223	2.28617	2.30508	2.7352	3.05501	2.9788	protein_coding	HGNC:24979	OTTHUMG00000122099.5_5
ENSG00000118961.15_4	LDAH	-0.0815314	0.242434	0.369235	0	40.1278	40.5415	43.0266	36.0682	39.8069	41.0512	9.05206	9.1454	9.70598	8.1363	8.97968	9.26037	protein_coding	HGNC:26145	OTTHUMG00000122097.7_4
ENSG00000119778.15_5	ATAD2B	-0.229833	0.0231677	0.066437	0	22.1604	23.1931	20.5297	20.6049	17.3433	18.2044	2.11031	2.20866	1.95502	1.96218	1.65158	1.73359	protein_coding	HGNC:29230	OTTHUMG00000151902.5_5
ENSG00000173960.14_4	UBXN2A	0.000508919	0.992774	0.995176	0	45.1634	43.8999	42.3708	45.0269	41.9955	44.4367	6.60476	6.41999	6.19638	6.5848	6.14149	6.49849	protein_coding	HGNC:27265	OTTHUMG00000125497.4_4
ENSG00000163026.12_7	WDCP	-0.16727	0.0190256	0.0575524	0	26.5886	27.4977	27.7092	24.7141	24.9206	23.2117	6.87043	7.10536	7.16	6.38608	6.43944	5.99785	protein_coding	HGNC:26157	OTTHUMG00000125498.6_7
ENSG00000119782.14_4	FKBP1B	-0.0663101	0.517433	0.638467	0	7.66112	8.12686	8.42373	6.99163	8.50646	7.64262	4.56835	4.84607	5.02309	4.16913	5.07243	4.55732	protein_coding	HGNC:3712	OTTHUMG00000151889.4_4
ENSG00000115128.7_3	SF3B6	-0.0972422	0.112518	0.211008	0	78.9036	79.7286	79.8489	69.6631	77.6731	75.6153	70.1366	70.8699	70.9768	61.9228	69.0427	67.2136	protein_coding	HGNC:30096	OTTHUMG00000125499.3_3
ENSG00000219626.9_6	FAM228B	-0.0897266	0.413696	0.545623	0	4.87882	5.64056	5.81758	5.2778	4.93457	5.14914	0.990422	1.14506	1.181	1.07142	1.00174	1.0453	protein_coding	HGNC:24736	OTTHUMG00000151901.4_6
ENSG00000115129.14_3	TP53I3	0.219766	0.00175269	0.0109377	0	85.9181	86.0371	89.7018	101.817	104.349	98.5634	37.1618	37.2133	38.7983	44.0384	45.1335	42.6312	protein_coding	HGNC:19373	OTTHUMG00000090817.4_3
ENSG00000198399.14_5	ITSN2	0.0176153	0.805052	0.870982	0	31.7613	32.1364	29.4074	32.7769	29.0293	32.618	2.64193	2.67313	2.44613	2.72641	2.41468	2.71319	protein_coding	HGNC:6184	OTTHUMG00000090818.7_5
ENSG00000084676.15_3	NCOA1	-0.379821	5.81125e-05	0.00110974	0	69.6946	74.8673	73.6278	54.7061	56.6753	56.3162	8.07305	8.67223	8.52864	6.33686	6.56496	6.52336	protein_coding	HGNC:7668	OTTHUMG00000125523.6_3
ENSG00000184924.5_2	PTRHD1	-0.054786	0.530426	0.650917	0	21.6706	20.7625	24.4137	19.9816	23.1037	21.3061	11.3044	10.8307	12.7354	10.4234	12.052	11.1143	protein_coding	HGNC:33782	OTTHUMG00000151978.3_2
ENSG00000138092.11_4	CENPO	-0.10704	0.131827	0.236389	0	75.8274	72.4738	73.7286	74.4735	67.7007	63.9588	13.7418	13.1341	13.3615	13.4965	12.2691	11.5909	protein_coding	HGNC:28152	OTTHUMG00000125525.4_4
ENSG00000138031.14_3	ADCY3	0.0258937	0.742128	0.824232	0	38.0117	37.5357	38.6886	43.3715	36.937	35.9832	6.27462	6.19606	6.38637	7.15937	6.09723	5.93978	protein_coding	HGNC:234	OTTHUMG00000094765.7_3
ENSG00000271936.1_6	AC012073.1	-0.0188283	0.90145	0.937945	0	2.64514	2.37497	2.35394	2.60969	2.02338	2.63539	2.38731	2.14348	2.12449	2.35531	1.82616	2.37851	lncRNA	NA	OTTHUMG00000185752.1_6
ENSG00000115137.11_3	DNAJC27	-0.394725	0.00522384	0.0233493	0	7.83746	7.42179	6.8096	5.53098	5.09975	6.14248	1.39357	1.31966	1.21081	0.98346	0.906783	1.09219	protein_coding	HGNC:30290	OTTHUMG00000125524.3_3
ENSG00000224165.6_6	DNAJC27-AS1	-0.0511756	0.772585	0.847594	0	0.920901	1.11327	1.10971	0.934814	0.991044	1.11497	0.159133	0.192374	0.19176	0.161537	0.171254	0.192668	lncRNA	HGNC:42943	OTTHUMG00000151981.3_6
ENSG00000084710.14_3	EFR3B	-0.300502	0.0241999	0.0686722	0	77.826	61.9905	61.2192	60.7629	49.4903	52.9104	7.31241	5.82453	5.75206	5.70919	4.65003	4.97138	protein_coding	HGNC:29155	OTTHUMG00000151988.7_3
ENSG00000119772.16_3	DNMT3A	-0.158177	0.0510425	0.119198	0	52.3934	52.0639	51.6353	51.5121	43.7298	44.6191	4.35885	4.33144	4.29578	4.28554	3.63809	3.71207	protein_coding	HGNC:2978	OTTHUMG00000094777.6_3
ENSG00000138101.18_4	DTNB	-0.084435	0.223617	0.347404	0	18.1241	17.7381	17.6545	16.8851	17.653	15.934	2.53626	2.48224	2.47055	2.36287	2.47033	2.22977	protein_coding	HGNC:3058	OTTHUMG00000152129.7_4
ENSG00000143970.16_3	ASXL2	0.169719	0.0350465	0.0904646	0	31.8593	33.5465	32.871	38.7753	33.6336	38.132	2.44639	2.57594	2.52408	2.97745	2.58263	2.92805	protein_coding	HGNC:23805	OTTHUMG00000152176.3_3
ENSG00000084731.15_4	KIF3C	0.0318331	0.54316	0.661439	0	219.802	222.227	224.767	229.399	232.771	219.507	34.3386	34.7175	35.1144	35.8381	36.3649	34.2927	protein_coding	HGNC:6321	OTTHUMG00000094797.5_4
ENSG00000084733.11_3	RAB10	-0.0968244	0.236016	0.362255	0	310.638	269.021	255.183	259.508	259.447	261.653	85.0131	73.6238	69.8367	71.0203	71.0036	71.6074	protein_coding	HGNC:9759	OTTHUMG00000094796.4_3
ENSG00000157833.13_4	GAREM2	-1.136	4.47743e-08	1.55465e-05	-1	52.6481	53.474	57.0661	24.2857	26.1594	23.8198	8.86034	8.99933	9.60386	4.08712	4.40246	4.00872	protein_coding	HGNC:27172	OTTHUMG00000151935.3_4
ENSG00000084754.12_5	HADHA	0.107689	0.107897	0.204502	0	211.886	209.462	219.353	214.287	239.131	236.962	48.923	48.3633	50.6472	49.4774	55.2137	54.7129	protein_coding	HGNC:4801	OTTHUMG00000096979.11_5
ENSG00000138029.14_4	HADHB	-0.00928379	0.885884	0.927323	0	162.941	163.001	169.937	151.011	172.421	169.293	38.097	38.1111	39.7328	35.3078	40.3135	39.5822	protein_coding	HGNC:4803	OTTHUMG00000096978.5_4
ENSG00000138018.18_6	SELENOI	-0.0939954	0.251935	0.379248	0	55.3912	57.9456	49.4999	52.5249	46.8888	53.1132	6.47699	6.77568	5.78811	6.14182	5.48278	6.21061	protein_coding	HGNC:29361	OTTHUMG00000151931.5_6
ENSG00000213699.9_4	SLC35F6	-0.0827298	0.172417	0.28774	0	68.0487	63.846	66.0111	59.0296	63.3029	64.5467	17.4395	16.3624	16.9172	15.128	16.2232	16.542	protein_coding	HGNC:26055	OTTHUMG00000128407.2_4
ENSG00000115163.15_4	CENPA	-0.285269	0.0134449	0.0454143	0	27.6466	23.1003	22.4296	21.1502	20.0067	18.8531	14.185	11.8524	11.5083	10.8518	10.2651	9.67324	protein_coding	HGNC:1851	OTTHUMG00000097073.5_4
ENSG00000157851.17_3	DPYSL5	-0.600181	2.09866e-05	0.000582047	-1	230.48	235.92	243.784	169.902	155.924	142.655	32.7015	33.4734	34.5891	24.1065	22.1232	20.2406	protein_coding	HGNC:20637	OTTHUMG00000097071.4_3
ENSG00000084764.11_5	MAPRE3	-0.250347	0.00294067	0.0156641	0	39.442	40.6529	37.4444	34.6855	31.6721	32.4355	10.8656	11.1991	10.3153	9.55523	8.7251	8.93541	protein_coding	HGNC:6892	OTTHUMG00000097067.5_5
ENSG00000119777.20_5	TMEM214	0.303727	0.000115218	0.00175237	0	93.9515	91.4736	90.9124	114.398	112.834	113.849	19.1386	18.6339	18.5195	23.3037	22.9852	23.1918	protein_coding	HGNC:25983	OTTHUMG00000151999.5_5
ENSG00000084693.16_4	AGBL5	0.0809445	0.179597	0.296109	0	53.2555	50.1713	53.3335	52.7975	57.2121	55.8094	10.0805	9.49675	10.0953	9.99385	10.8295	10.564	protein_coding	HGNC:26147	OTTHUMG00000128406.8_4
ENSG00000228474.6_3	OST4	-0.000356286	0.99565	0.996944	0	134.667	140.736	148.214	132.919	150.288	140.344	224.445	234.56	247.023	221.531	250.479	233.907	protein_coding	HGNC:32483	OTTHUMG00000151990.5_3
ENSG00000138080.13_2	EMILIN1	1.12437	0.000590649	0.00532012	1	0.783746	0.463862	0.689367	1.34379	1.46592	1.41905	0.198016	0.117196	0.174171	0.339514	0.370369	0.358528	protein_coding	HGNC:19880	OTTHUMG00000097069.4_2
ENSG00000138030.13_4	KHK	0.191525	0.0805523	0.165225	0	8.15096	7.10637	8.18833	9.54289	8.96069	8.27106	2.67245	2.32996	2.6847	3.12882	2.93793	2.71182	protein_coding	HGNC:6315	OTTHUMG00000097077.4_4
ENSG00000138028.16_3	CGREF1	0.971118	0.00194339	0.0117836	1	0.64659	0.463862	0.739808	1.05167	1.23881	1.35824	0.159573	0.114477	0.182579	0.259542	0.305727	0.335202	protein_coding	HGNC:16962	OTTHUMG00000152009.4_3
ENSG00000138073.14_4	PREB	0.0160832	0.737484	0.820674	0	64.0908	65.3118	65.7925	65.807	66.8955	64.6886	19.9536	20.3337	20.4833	20.4879	20.8267	20.1397	protein_coding	HGNC:9356	OTTHUMG00000097076.4_4
ENSG00000138074.15_7	SLC5A6	0.204251	0.0174506	0.0541046	0	55.6656	60.9329	62.3121	74.045	64.7482	67.3443	9.96162	10.9042	11.151	13.2507	11.587	12.0516	protein_coding	HGNC:11041	OTTHUMG00000097075.10_7
ENSG00000138085.16_7	ATRAID	-0.0534073	0.39422	0.527644	0	93.2854	90.6757	94.4769	83.6074	95.5945	89.1369	46.2037	44.9112	46.7939	41.4103	47.3474	44.149	protein_coding	HGNC:24090	OTTHUMG00000128405.6_7
ENSG00000084774.14_5	CAD	0.53111	0.000242401	0.00289608	0	57.8404	69.802	68.3987	101.038	86.2208	96.07	6.8507	8.26743	8.10123	11.967	10.2121	11.3787	protein_coding	HGNC:1424	OTTHUMG00000097070.6_5
ENSG00000115194.10_5	SLC30A3	1.41277	6.28096e-06	0.000266543	1	1.8614	2.02244	1.64776	5.60888	4.60423	4.50043	0.311374	0.338314	0.275637	0.938254	0.770195	0.752832	protein_coding	HGNC:11014	OTTHUMG00000128409.4_5
ENSG00000138100.13_2	TRIM54	1.09197	0.000412707	0.004142	1	0.509435	0.70507	0.638926	1.18799	1.48657	1.29742	0.184311	0.255091	0.23116	0.429809	0.537831	0.4694	protein_coding	HGNC:16008	OTTHUMG00000097078.3_2
ENSG00000115204.15_4	MPV17	0.095282	0.0789119	0.163084	0	81.8819	83.6065	82.3878	86.3145	91.4032	87.0894	14.5594	14.866	14.6493	15.3475	16.2523	15.4853	protein_coding	HGNC:7224	OTTHUMG00000097074.8_4
ENSG00000115207.13_4	GTF3C2	0.12618	0.0437924	0.106291	0	109.548	103.571	110.047	122.305	117.521	112.876	18.7614	17.7378	18.8468	20.9462	20.127	19.3313	protein_coding	HGNC:4665	OTTHUMG00000097785.9_4
ENSG00000234072.1_6	AC074117.1	0.345301	0.0315502	0.0837479	0	6.66184	6.17864	5.3468	8.84178	6.54502	7.68316	1.95247	1.81086	1.56706	2.59138	1.91824	2.25181	lncRNA	NA	OTTHUMG00000151914.1_6
ENSG00000115211.15_4	EIF2B4	0.122745	0.10633	0.202261	0	60.7991	54.1976	57.6042	67.4624	60.6395	59.803	11.3835	10.1475	10.7853	12.631	11.3536	11.197	protein_coding	HGNC:3260	OTTHUMG00000151927.2_4
ENSG00000115234.11_3	SNX17	0.0309692	0.648545	0.751438	0	151.322	162.667	170.896	156.114	174.279	165.056	40.1704	43.1821	45.3665	41.4425	46.2647	43.8164	protein_coding	HGNC:14979	OTTHUMG00000097781.3_3
ENSG00000163795.14_5	ZNF513	0.0433671	0.438679	0.570592	0	35.3273	37.0533	37.6462	38.7169	37.7629	36.9157	14.9061	15.6343	15.8845	16.3362	15.9337	15.5762	protein_coding	HGNC:26498	OTTHUMG00000097783.4_5
ENSG00000115241.11_4	PPM1G	0.0187325	0.785479	0.857131	0	213.434	231.189	247.584	225.952	242.599	232.745	53.4252	57.8695	61.9734	56.5588	60.7257	58.2591	protein_coding	HGNC:9278	OTTHUMG00000097788.3_4
ENSG00000115216.14_4	NRBP1	0.134986	0.0634005	0.139504	0	287.792	305.462	318.706	319.998	351.717	329.727	54.0048	57.3208	59.806	60.0485	66.0006	61.8742	protein_coding	HGNC:7993	OTTHUMG00000097789.4_4
ENSG00000157992.12_3	KRTCAP3	0.731693	0.0614829	0.136522	0	1.15603	1.00194	1.12653	2.66811	0.908457	1.86504	0.823967	0.714142	0.802941	1.90172	0.64751	1.32932	protein_coding	HGNC:28943	OTTHUMG00000097782.2_3
ENSG00000138002.15_4	IFT172	0.178746	0.0523253	0.121468	0	11.619	12.7655	11.8874	14.5675	12.6978	13.7851	1.38404	1.52061	1.41601	1.73526	1.51254	1.64206	protein_coding	HGNC:30391	OTTHUMG00000128425.5_4
ENSG00000115226.10_3	FNDC4	0.210316	0.0797304	0.164158	0	28.7831	35.235	36.3683	35.0945	43.1104	38.0104	14.8596	18.1905	18.7756	18.1179	22.2563	19.6233	protein_coding	HGNC:20239	OTTHUMG00000097787.3_3
ENSG00000243943.10_4	ZNF512	-0.191014	0.0149124	0.0485626	0	32.4863	34.7711	33.2578	27.8691	29.05	31.1381	7.38324	7.90252	7.55858	6.33389	6.60227	7.07684	protein_coding	HGNC:29380	OTTHUMG00000097786.6_4
ENSG00000176714.9_3	CCDC121	-0.304573	0.0215421	0.0631954	0	4.15385	4.32319	4.11939	3.40818	3.13831	3.649	1.46057	1.52011	1.44845	1.19837	1.10348	1.28305	protein_coding	HGNC:25833	OTTHUMG00000128427.4_3
ENSG00000198522.13_4	GPN1	-0.00725859	0.955802	0.971649	0	84.5858	114.314	122.237	98.3307	114.61	106.693	22.5803	30.5163	32.6312	26.2495	30.5953	28.4817	protein_coding	HGNC:17030	OTTHUMG00000097784.5_4
ENSG00000119760.16_3	SUPT7L	0.195846	0.00888805	0.0337248	0	69.5966	66.9631	65.6412	82.1857	73.7295	75.6559	13.1018	12.606	12.3572	15.4717	13.8798	14.2424	protein_coding	HGNC:30632	OTTHUMG00000151947.3_3
ENSG00000163798.13_4	SLC4A1AP	0.168411	0.0125729	0.0431065	0	43.5371	46.1079	47.2637	51.6485	50.2542	51.9779	8.36126	8.85498	9.07695	9.91904	9.65128	9.98232	protein_coding	HGNC:13813	OTTHUMG00000151944.4_4
ENSG00000243147.8_4	MRPL33	-0.0148632	0.870339	0.917315	0	50.7671	58.0013	60.7652	50.0904	59.5039	58.2623	33.1378	37.8599	39.664	32.6961	38.8407	38.0302	protein_coding	HGNC:14487	OTTHUMG00000097795.3_4
ENSG00000171174.15_3	RBKS	0.0645187	0.753843	0.833419	0	1.27359	1.13182	1.16015	1.03219	1.11492	1.58123	0.403929	0.358967	0.367952	0.327368	0.353608	0.501501	protein_coding	HGNC:30325	OTTHUMG00000097833.4_3
ENSG00000158019.20_8	BABAM2	0.0531919	0.560425	0.676558	0	30.0763	34.4186	35.9143	31.7642	37.8042	34.6655	8.86682	10.147	10.588	9.36444	11.1451	10.2198	protein_coding	HGNC:1106	OTTHUMG00000097831.4_8
ENSG00000075426.12_4	FOSL2	0.646847	0.0075675	0.0301165	1	143.053	244.845	250.459	317.369	336.294	346.026	19.9739	34.1867	34.9705	44.3129	46.9554	48.3142	protein_coding	HGNC:3798	OTTHUMG00000097832.7_4
ENSG00000163803.13_7	PLB1	0.709563	0.000160803	0.00219757	1	3.48767	4.26753	4.2539	6.38789	6.68955	6.58847	0.405402	0.496051	0.494467	0.742519	0.777583	0.765834	protein_coding	HGNC:30041	OTTHUMG00000152014.5_7
ENSG00000226833.6_6	AC092164.1	0.137905	0.439853	0.571574	0	0.920901	0.946278	0.891133	1.14904	0.929104	0.952794	0.145115	0.149114	0.140424	0.181066	0.146408	0.150141	lncRNA	NA	OTTHUMG00000152012.11_6
ENSG00000213639.10_6	PPP1CB	-0.345842	0.0082305	0.0319704	0	575.191	620.536	511.611	391.765	460.732	490.912	99.8596	107.732	88.8214	68.0147	79.9882	85.2277	protein_coding	HGNC:9282	OTTHUMG00000152011.6_6
ENSG00000171103.11_4	TRMT61B	-0.0711674	0.288914	0.419117	0	15.3418	15.8455	16.6121	15.1128	15.0721	15.3258	7.43306	7.6771	8.04848	7.3221	7.30239	7.42528	protein_coding	HGNC:26070	OTTHUMG00000128433.3_4
ENSG00000163811.12_4	WDR43	0.16311	0.0224148	0.0649592	0	47.8477	53.3812	53.3503	57.3352	58.1825	57.5933	11.6616	13.0103	13.0027	13.974	14.1805	14.0369	protein_coding	HGNC:28945	OTTHUMG00000152015.6_4
ENSG00000189350.12_3	TOGARAM2	0.38335	0.0894407	0.17791	0	0.705371	0.779288	0.907947	1.24642	0.970397	0.912249	0.0355961	0.0393262	0.0458189	0.0628996	0.0489704	0.046036	protein_coding	HGNC:33715	OTTHUMG00000128432.7_3
ENSG00000115295.20_4	CLIP4	0.278581	0.00230801	0.0133097	0	31.0755	29.446	26.9358	35.3282	35.3472	35.375	3.99377	3.78434	3.46173	4.54031	4.54276	4.54633	protein_coding	HGNC:26108	OTTHUMG00000097837.5_4
ENSG00000171094.18_6	ALK	-0.184594	0.00767966	0.0303919	0	100.711	104.573	104.313	88.8463	87.728	95.847	13.6428	14.166	14.1307	12.0355	11.884	12.9839	protein_coding	HGNC:427	OTTHUMG00000152034.4_6
ENSG00000119801.13_3	YPEL5	-0.181282	0.0269505	0.0746779	0	87.466	80.3966	75.5445	67.4819	73.9567	73.2029	25.5674	23.5009	22.0826	19.7258	21.6184	21.3981	protein_coding	HGNC:18329	OTTHUMG00000097839.5_3
ENSG00000213626.13_4	LBH	0.550118	0.0115378	0.0406168	0	77.2773	122.144	124.607	138.43	172.38	163.82	17.0515	26.9515	27.495	30.5451	38.0361	36.1473	protein_coding	HGNC:29532	OTTHUMG00000152051.6_4
ENSG00000172954.13_4	LCLAT1	0.081556	0.345771	0.479485	0	11.4427	10.7616	9.73521	11.3151	11.0667	11.393	1.52224	1.43163	1.29509	1.50527	1.47222	1.51563	protein_coding	HGNC:26756	OTTHUMG00000099349.7_4
ENSG00000013016.16_4	EHD3	0.533942	0.000118285	0.00179104	0	11.2859	10.2606	10.0379	14.5091	16.1871	15.0217	2.33906	2.12655	2.08038	3.00707	3.35483	3.11331	protein_coding	HGNC:3244	OTTHUMG00000099365.2_4
ENSG00000162959.13_3	MEMO1	-0.160562	0.290332	0.420374	0	3.37011	3.20992	2.62296	3.01867	2.66343	2.53403	0.645614	0.614928	0.502482	0.578289	0.510236	0.485445	protein_coding	HGNC:14014	OTTHUMG00000128453.7_3
ENSG00000162961.14_4	DPY30	-0.12977	0.114584	0.213915	0	32.0748	29.2419	30.0463	25.3373	29.4836	28.6852	11.7706	10.731	11.0262	9.29811	10.8197	10.5267	protein_coding	HGNC:24590	OTTHUMG00000128457.4_4
ENSG00000021574.12_5	SPAST	-0.381456	0.00431319	0.0205342	0	37.659	32.0621	28.4994	25.5516	24.0741	25.7254	3.96828	3.37852	3.0031	2.69247	2.53679	2.71079	protein_coding	HGNC:11233	OTTHUMG00000128455.7_5
ENSG00000152683.14_4	SLC30A6	-0.0346957	0.678235	0.774561	0	37.6394	33.4908	30.5339	31.9979	32.849	34.3614	6.95737	6.19054	5.64398	5.91458	6.0719	6.35146	protein_coding	HGNC:19305	OTTHUMG00000128456.3_4
ENSG00000119820.11_4	YIPF4	-0.203203	0.00989884	0.0362666	0	43.5371	39.9292	39.9665	35.9903	34.0465	37.1589	3.55724	3.26246	3.2655	2.94063	2.7818	3.03611	protein_coding	HGNC:28145	OTTHUMG00000128452.4_4
ENSG00000115760.14_4	BIRC6	0.043232	0.652729	0.755077	0	54.392	65.4788	59.0838	67.4819	54.7139	62.1951	3.0458	3.66663	3.30853	3.7788	3.06383	3.48276	protein_coding	HGNC:13516	OTTHUMG00000150528.8_4
ENSG00000018699.13_5	TTC27	0.127048	0.074051	0.155339	0	18.7903	18.406	20.2102	20.527	21.0597	21.1236	5.45754	5.34593	5.86995	5.96194	6.11667	6.13524	protein_coding	HGNC:25986	OTTHUMG00000152134.7_5
ENSG00000049323.16_5	LTBP1	-1.08166	3.39493e-06	0.000187823	-1	95.9501	117.728	116.738	46.1564	53.6816	56.3162	13.058	16.0218	15.8871	6.2815	7.3056	7.66415	protein_coding	HGNC:6714	OTTHUMG00000152118.15_5
ENSG00000119812.19_4	FAM98A	0.0867511	0.148354	0.258764	0	64.0712	65.8498	65.1872	64.9306	71.2106	71.0743	13.0253	13.3868	13.2521	13.2	14.4767	14.4489	protein_coding	HGNC:24520	OTTHUMG00000152152.6_4
ENSG00000260025.1_7	CRIM1-DT	0.0782628	0.623466	0.730727	0	5.66256	6.73528	7.39808	5.58941	8.01094	7.33854	15.4715	18.4024	20.2133	15.2716	21.8878	20.0506	lncRNA	HGNC:54057	OTTHUMG00000175796.1_7
ENSG00000150938.10_3	CRIM1	0.0526994	0.773846	0.848342	0	182.574	297.725	292.83	231.951	272.929	297.13	25.1133	40.9526	40.2792	31.9052	37.5419	40.8707	protein_coding	HGNC:2359	OTTHUMG00000099419.3_3
ENSG00000171055.15_6	FEZ2	-0.0953878	0.20469	0.325396	0	171.856	182.242	173.451	148.733	171.389	173.692	19.2276	20.3896	19.4061	16.6405	19.1753	19.433	protein_coding	HGNC:3660	OTTHUMG00000152148.5_6
ENSG00000115808.12_3	STRN	0.0248802	0.76966	0.84547	0	39.7359	35.4205	32.7702	38.4637	34.0671	37.2198	2.76886	2.46816	2.28348	2.68021	2.37385	2.59353	protein_coding	HGNC:11424	OTTHUMG00000100959.3_3
ENSG00000008869.12_4	HEATR5B	0.213405	0.0102202	0.0371208	0	23.4732	25.1784	24.3296	28.5118	26.4485	29.6582	2.84938	3.05638	2.95334	3.46101	3.21055	3.60017	protein_coding	HGNC:29273	OTTHUMG00000152158.2_4
ENSG00000152133.14_2	GPATCH11	-0.132337	0.0580708	0.130775	0	27.3723	28.9821	27.4234	24.9673	26.7788	24.6915	6.77533	7.17379	6.78796	6.18003	6.62842	6.11177	protein_coding	HGNC:26768	OTTHUMG00000128469.3_2
ENSG00000055332.18_6	EIF2AK2	-0.195936	0.0181536	0.0555662	0	72.5553	71.7316	65.4562	61.4251	56.8612	64.79	6.74745	6.67085	6.08725	5.71236	5.28793	6.02529	protein_coding	HGNC:9437	OTTHUMG00000100962.7_6
ENSG00000218739.10_4	CEBPZOS	-0.131804	0.15331	0.26494	0	43.106	40.1519	35.0736	33.6728	36.6067	37.686	9.17149	8.54296	7.46248	7.16442	7.78866	8.0183	protein_coding	HGNC:49288	OTTHUMG00000152162.5_4
ENSG00000115816.15_5	CEBPZ	0.0253127	0.635354	0.740343	0	55.4696	56.3314	59.9077	57.6274	58.6987	58.4448	15.7943	16.0397	17.058	16.4087	16.7138	16.6414	protein_coding	HGNC:24218	OTTHUMG00000100960.4_5
ENSG00000003509.16_4	NDUFAF7	-0.0239773	0.707933	0.798447	0	16.7526	16.1981	15.6705	16.3008	15.7948	15.711	4.58849	4.43661	4.29211	4.46475	4.32615	4.30319	protein_coding	HGNC:28816	OTTHUMG00000128468.7_4
ENSG00000115825.10_4	PRKD3	-0.235972	0.00375879	0.0186392	0	89.0727	83.6065	78.5374	73.4024	70.137	69.7364	8.69511	8.16151	7.66667	7.1654	6.84664	6.80753	protein_coding	HGNC:9408	OTTHUMG00000100961.7_4
ENSG00000163171.7_2	CDC42EP3	-0.49533	6.3161e-06	0.000266543	0	347.631	356.506	352.267	250.296	245.366	253.747	33.4067	34.2596	33.8523	24.0531	23.5793	24.3847	protein_coding	HGNC:16943	OTTHUMG00000100971.5_2
ENSG00000115841.20_5	RMDN2	0.00667879	0.955135	0.971332	0	3.50726	3.20992	3.68223	3.25237	3.71642	3.48682	0.581539	0.532238	0.61055	0.539276	0.616219	0.578149	protein_coding	HGNC:26567	OTTHUMG00000128487.10_5
ENSG00000138061.12_5	CYP1B1	3.0951	6.16161e-08	1.71934e-05	1	1.70465	1.55858	1.41236	10.244	14.9276	14.7582	0.284868	0.260457	0.236023	1.7119	2.49459	2.46627	protein_coding	HGNC:2597	OTTHUMG00000100970.9_5
ENSG00000119787.14_5	ATL2	-0.118045	0.176643	0.292756	0	28.6263	24.9558	23.7916	24.4025	22.6495	24.205	4.92708	4.29531	4.09493	4.20009	3.89836	4.16609	protein_coding	HGNC:24047	OTTHUMG00000102074.10_5
ENSG00000213553.4_4	RPLP0P6	0.189149	0.386808	0.520145	0	3.11539	3.63668	3.83355	2.76549	4.97587	4.35852	3.26561	3.81203	4.0184	2.89884	5.21579	4.56868	processed_pseudogene	HGNC:36404	OTTHUMG00000153430.1_4
ENSG00000143889.16_7	HNRNPLL	-0.291085	0.000569909	0.0052026	0	63.4246	59.9124	60.0086	47.9676	51.7821	50.0926	10.6919	10.0999	10.1161	8.08625	8.72927	8.44447	protein_coding	HGNC:25127	OTTHUMG00000102075.5_7
ENSG00000143891.17_5	GALM	0.0173022	0.889998	0.92985	0	4.13426	3.24703	3.81674	3.7003	3.799	3.83145	1.58037	1.24122	1.459	1.41449	1.45222	1.46462	protein_coding	HGNC:24063	OTTHUMG00000102077.5_5
ENSG00000115875.19_5	SRSF7	-0.248342	0.000803496	0.0064739	0	145.13	145.226	152.182	126.745	123.922	121.897	35.8789	35.9026	37.6222	31.3338	30.6358	30.1352	protein_coding	HGNC:10789	OTTHUMG00000102076.6_5
ENSG00000152147.11_4	GEMIN6	0.0375205	0.581755	0.694217	0	13.6568	13.5077	14.1068	14.7038	13.6681	13.9878	3.13013	3.09596	3.23328	3.37012	3.13274	3.20601	protein_coding	HGNC:20044	OTTHUMG00000128588.4_4
ENSG00000163214.21_6	DHX57	0.0316228	0.577307	0.690476	0	30.7032	31.9137	32.3498	31.55	32.1263	33.4086	3.8456	3.99721	4.05183	3.95165	4.02384	4.18444	protein_coding	HGNC:20086	OTTHUMG00000102103.10_6
ENSG00000188010.14_5	MORN2	-0.0715313	0.310697	0.442563	0	20.9456	20.6882	21.7235	18.93	21.39	19.9884	15.356	15.1673	15.9263	13.8783	15.6818	14.6542	protein_coding	HGNC:30166	OTTHUMG00000128589.5_5
ENSG00000115904.12_4	SOS1	-0.153333	0.0566695	0.128612	0	55.3717	54.6986	49.13	48.6493	44.4318	50.0318	5.97772	5.90506	5.3039	5.252	4.7967	5.40125	protein_coding	HGNC:11187	OTTHUMG00000102109.5_4
ENSG00000229692.3_6	SOS1-IT1	-0.485035	0.134709	0.240246	0	1.29318	1.09471	0.857505	1.01271	0.454229	0.83116	1.03124	0.872978	0.683816	0.807588	0.362224	0.662807	lncRNA	HGNC:41385	OTTHUMG00000153569.3_6
ENSG00000011566.15_5	MAP4K3	-0.388095	7.29932e-05	0.00127731	0	54.8622	52.6391	51.1645	40.6644	39.0637	41.4972	9.05915	8.69205	8.44856	6.71473	6.4504	6.85225	protein_coding	HGNC:6865	OTTHUMG00000102127.5_5
ENSG00000231312.7_8	MAP4K3-DT	-0.178216	0.0813393	0.166167	0	6.85778	6.80949	7.49897	6.07629	6.07014	6.56819	0.54388	0.54005	0.594731	0.481901	0.481414	0.520913	lncRNA	HGNC:54056	OTTHUMG00000152299.6_8
ENSG00000152154.11_4	TMEM178A	-1.31986	2.78995e-09	3.05373e-06	-1	120.638	117.06	111.341	46.6628	46.3313	46.8085	48.8018	47.3545	45.0409	18.8765	18.7424	18.9355	protein_coding	HGNC:28517	OTTHUMG00000128591.3_4
ENSG00000138050.15_3	THUMPD2	-0.154115	0.0789003	0.163084	0	23.532	21.3005	20.3111	20.7412	19.2221	18.5491	6.15537	5.57168	5.31287	5.42537	5.02802	4.85197	protein_coding	HGNC:14890	OTTHUMG00000102149.5_3
ENSG00000183023.18_4	SLC8A1	-0.732251	0.000426333	0.00423022	-1	16.9485	20.4099	19.7058	9.30919	11.8099	13.258	0.773128	0.931025	0.898906	0.42465	0.538726	0.604782	protein_coding	HGNC:11068	OTTHUMG00000102183.9_4
ENSG00000143924.19_3	EML4	-0.162026	0.0176759	0.0545806	0	59.6235	61.9534	59.1511	55.0372	50.9149	55.5661	7.13712	7.41602	7.08057	6.58812	6.09467	6.65144	protein_coding	HGNC:1316	OTTHUMG00000128603.7_3
ENSG00000115944.15_4	COX7A2L	0.0236502	0.726564	0.812623	0	71.2621	76.1476	74.2499	68.5725	78.8499	77.9263	12.714	13.5857	13.2471	12.2342	14.0678	13.903	protein_coding	HGNC:2289	OTTHUMG00000128605.9_4
ENSG00000057935.13_4	MTA3	-0.398808	0.00013598	0.00194483	0	48.0044	47.7592	47.3309	35.036	38.9191	34.5844	4.53728	4.5141	4.47362	3.31154	3.67856	3.26884	protein_coding	HGNC:23784	OTTHUMG00000150452.5_4
ENSG00000152518.8_4	ZFP36L2	0.044059	0.479295	0.605901	0	61.2497	69.2453	67.104	67.365	66.5238	69.858	16.5854	18.7504	18.1706	18.2413	18.0135	18.9163	protein_coding	HGNC:1108	OTTHUMG00000128642.3_4
ENSG00000115970.18_3	THADA	0.258088	0.00983068	0.036119	0	30.86	32.6002	30.9374	40.0996	33.3858	39.3889	2.17018	2.29256	2.17563	2.81994	2.34781	2.76996	protein_coding	HGNC:19217	OTTHUMG00000152398.10_3
ENSG00000152527.14_6	PLEKHH2	0.511097	0.0268219	0.0744036	0	29.7236	25.8649	23.7243	49.2141	27.1505	36.5508	3.01823	2.62642	2.40905	4.99737	2.75695	3.71149	protein_coding	HGNC:30506	OTTHUMG00000128657.8_6
ENSG00000223658.8_5	C1GALT1C1L	-0.257534	0.176018	0.291908	0	1.25399	1.35448	1.59731	1.05167	1.34204	1.13524	0.980448	1.05901	1.24888	0.822256	1.04929	0.887602	protein_coding	HGNC:51617	OTTHUMG00000152807.4_5
ENSG00000138036.18_3	DYNC2LI1	0.0900408	0.337402	0.470555	0	26.0987	21.4861	21.0005	24.9478	23.7231	24.2861	5.65152	4.65268	4.54753	5.4023	5.1371	5.25901	protein_coding	HGNC:24595	OTTHUMG00000128656.9_3
ENSG00000138095.19_3	LRPPRC	0.100838	0.0669588	0.144793	0	103.925	110.343	107.272	113.95	113.805	117.072	10.3635	11.0035	10.6973	11.3632	11.3487	11.6745	protein_coding	HGNC:15714	OTTHUMG00000152782.12_3
ENSG00000138032.21_6	PPM1B	-0.727154	2.37292e-05	0.000638679	-1	15.577	13.8416	13.367	8.277	9.14651	8.41296	2.19239	1.94816	1.88135	1.16495	1.28733	1.18409	protein_coding	HGNC:9276	OTTHUMG00000128757.19_6
ENSG00000138078.15_4	PREPL	0.0388756	0.550826	0.668215	0	107.04	105.352	95.3344	101.174	104.101	110.828	13.1289	12.9219	11.6932	12.4094	12.7684	13.5935	protein_coding	HGNC:30228	OTTHUMG00000152791.7_4
ENSG00000143919.15_4	CAMKMT	-0.00328988	0.972623	0.982467	0	4.87882	4.7685	5.14503	5.02462	4.85199	4.8856	1.22154	1.19392	1.28819	1.25804	1.21482	1.22324	protein_coding	HGNC:26276	OTTHUMG00000128761.5_4
ENSG00000068784.13_3	SRBD1	-0.0151965	0.774371	0.848667	0	33.2308	34.0104	34.1993	32.7185	33.4684	34.1992	6.58688	6.7414	6.77886	6.48533	6.63397	6.77883	protein_coding	HGNC:25521	OTTHUMG00000128814.5_3
ENSG00000171132.14_4	PRKCE	-0.134699	0.1491	0.259567	0	13.3237	12.5243	11.9042	11.9384	10.4266	12.0011	1.33531	1.25519	1.19304	1.19647	1.04496	1.20276	protein_coding	HGNC:9401	OTTHUMG00000128817.9_4
ENSG00000116016.14_4	EPAS1	0.619716	0.000963261	0.00731298	1	18.7119	13.1737	13.7369	23.1561	23.8264	23.0495	2.56644	1.80684	1.88409	3.17599	3.26791	3.16136	protein_coding	HGNC:3374	OTTHUMG00000128818.25_4
ENSG00000250565.7_4	ATP6V1E2	-0.00961511	0.9376	0.95877	0	3.64442	4.13765	4.48929	4.34299	4.04676	3.81117	0.687237	0.780247	0.846557	0.818968	0.763108	0.718683	protein_coding	HGNC:18125	OTTHUMG00000128819.3_4
ENSG00000119729.12_4	RHOQ	0.253782	0.0156857	0.0504008	0	52.1779	56.7025	48.3566	55.933	65.4089	66.1279	8.12234	8.82666	7.52749	8.70688	10.182	10.2939	protein_coding	HGNC:17736	OTTHUMG00000150653.3_4
ENSG00000151665.12_3	PIGF	-0.170164	0.0874764	0.175248	0	17.791	15.8826	14.2581	14.3922	14.3082	13.8662	3.57393	3.19057	2.86423	2.89117	2.87429	2.78549	protein_coding	HGNC:8962	OTTHUMG00000128816.5_3
ENSG00000119878.5_2	CRIPT	-0.163417	0.115757	0.215194	0	13.696	11.8563	11.1308	10.8477	10.4679	11.4132	5.3479	4.62956	4.34625	4.23574	4.08743	4.45656	protein_coding	HGNC:14312	OTTHUMG00000128815.2_2
ENSG00000171150.9_4	SOCS5	0.0279335	0.759948	0.838506	0	26.0791	23.0076	20.6138	22.7471	23.9089	24.3672	3.48186	3.07177	2.75217	3.037	3.19211	3.2533	protein_coding	HGNC:16852	OTTHUMG00000128852.4_4
ENSG00000180398.12_3	MCFD2	-0.0150949	0.765683	0.842793	0	141.153	140.142	140.211	133.62	142.896	140.608	23.549	23.3804	23.3918	22.2923	23.8399	23.4581	protein_coding	HGNC:18451	OTTHUMG00000153100.5_3
ENSG00000068724.17_5	TTC7A	0.800611	1.95542e-06	0.000131707	1	10.8745	10.0751	10.475	19.0663	18.1898	17.4746	1.51455	1.40321	1.45892	2.65547	2.5334	2.43379	protein_coding	HGNC:19750	OTTHUMG00000153121.8_5
ENSG00000143933.18_5	CALM2	-0.0599242	0.415827	0.547429	0	361.836	373.316	355.327	316.045	360.554	369.522	50.8625	52.4763	49.9475	44.4258	50.6823	51.9429	protein_coding	HGNC:1445	OTTHUMG00000128850.11_5
ENSG00000234690.7_7	EPCAM-DT	-0.274894	0.150644	0.261324	0	1.72424	1.41014	1.36192	1.07114	1.38333	1.25688	0.479755	0.39236	0.378943	0.298036	0.3849	0.349715	lncRNA	HGNC:52639	OTTHUMG00000151698.7_7
ENSG00000095002.14_4	MSH2	-0.157164	0.0126722	0.0433927	0	48.4355	47.7221	47.3141	44.1894	41.8303	42.6324	3.51568	3.4639	3.43428	3.20748	3.03624	3.09446	protein_coding	HGNC:7325	OTTHUMG00000128861.9_4
ENSG00000116062.15_5	MSH6	-0.186711	0.00391251	0.0191508	0	98.654	96.205	101.001	88.4957	86.5718	84.8797	8.97426	8.75148	9.18773	8.05019	7.87518	7.72125	protein_coding	HGNC:7329	OTTHUMG00000129129.12_5
ENSG00000138081.20_3	FBXO11	-0.138935	0.0453165	0.109048	0	70.3216	75.3312	67.2385	63.9958	62.4358	66.8983	9.94085	10.649	9.50502	9.04662	8.82609	9.45692	protein_coding	HGNC:13590	OTTHUMG00000129130.6_3
ENSG00000170802.16_5	FOXN2	0.42741	0.00675583	0.0280002	0	4.0167	3.82222	3.161	4.77145	4.95522	5.04778	0.732707	0.697231	0.576614	0.870384	0.903907	0.920791	protein_coding	HGNC:5281	OTTHUMG00000129168.6_5
ENSG00000162869.16_4	PPP1R21	0.11133	0.187392	0.30455	0	17.1444	16.4578	18.428	17.3914	18.706	20.1303	4.28825	4.11651	4.60929	4.35003	4.67883	5.03509	protein_coding	HGNC:30595	OTTHUMG00000129167.12_4
ENSG00000243244.6_5	STON1	0.296243	0.0275997	0.0759145	0	4.34979	4.1562	4.05213	4.84935	4.81069	5.75731	0.564248	0.539137	0.525637	0.62905	0.624036	0.746829	protein_coding	HGNC:17003	OTTHUMG00000129169.7_5
ENSG00000068781.21_3	STON1-GTF2A1L	-1.32593	0.000219376	0.00269081	-1	2.11611	3.08004	3.2787	0.934814	1.11492	1.33797	0.492807	0.71729	0.763553	0.217702	0.259647	0.31159	protein_coding	HGNC:30651	OTTHUMG00000152037.6_3
ENSG00000115239.22_5	ASB3	-0.387966	9.93369e-05	0.00158302	0	23.336	23.49	22.6146	17.6251	17.9007	17.5355	3.4654	3.48826	3.35827	2.61734	2.65826	2.60402	protein_coding	HGNC:16013	OTTHUMG00000184778.2_5
ENSG00000143942.5_3	CHAC2	-0.555467	0.000331296	0.00356287	0	7.48477	7.12492	6.70872	4.61564	5.14104	4.7437	5.71793	5.44303	5.12507	3.52608	3.92746	3.62391	protein_coding	HGNC:32363	OTTHUMG00000151824.2_3
ENSG00000068912.14_4	ERLEC1	-0.139565	0.0584576	0.131441	0	62.1315	56.0531	57.5874	50.1878	56.0972	53.2753	23.9705	21.6254	22.2173	19.3626	21.6424	20.5538	protein_coding	HGNC:25222	OTTHUMG00000129281.5_4
ENSG00000068878.15_3	PSME4	0.113743	0.0708537	0.15037	0	58.1148	55.9974	54.5272	63.5284	58.2445	60.6747	5.59226	5.38851	5.24704	6.1132	5.60474	5.8386	protein_coding	HGNC:20635	OTTHUMG00000151852.6_3
ENSG00000170634.13_4	ACYP2	-0.0290229	0.728552	0.814513	0	9.75764	8.73916	9.21398	8.84178	9.43557	8.87922	1.96568	1.76051	1.85616	1.78118	1.9008	1.78872	protein_coding	HGNC:180	OTTHUMG00000129287.8_4
ENSG00000115306.16_5	SPTBN1	-0.0151068	0.835646	0.893796	0	309.266	362.016	344.902	333.651	323.225	348.743	16.7415	19.5971	18.6706	18.0615	17.4972	18.8785	protein_coding	HGNC:11275	OTTHUMG00000133746.7_5
ENSG00000214595.11_2	EML6	-1.261	7.1673e-06	0.000284054	-1	58.2911	44.1226	43.7328	22.455	17.8801	20.5966	4.0407	3.05854	3.03152	1.55656	1.23943	1.42774	protein_coding	HGNC:35412	OTTHUMG00000152035.10_2
ENSG00000115310.18_5	RTN4	-0.316767	0.00108595	0.0078724	0	934.186	974.314	936.278	708.219	779.435	796.333	140.606	146.646	140.921	106.595	117.314	119.857	protein_coding	HGNC:14085	OTTHUMG00000129337.11_5
ENSG00000162994.16_4	CLHC1	-0.330853	0.067331	0.145299	0	11.7562	12.1346	9.68477	10.5751	6.87537	9.20358	1.76998	1.82695	1.45811	1.59215	1.03514	1.38566	protein_coding	HGNC:26453	OTTHUMG00000151918.9_4
ENSG00000143947.13_2	RPS27A	0.0078895	0.916747	0.947039	0	423.007	436.847	484.894	420.277	469.197	462.693	135.146	139.568	154.918	134.274	149.903	147.825	protein_coding	HGNC:10417	OTTHUMG00000151919.18_2
ENSG00000085760.14_2	MTIF2	0.0614018	0.319013	0.450978	0	31.7613	30.4293	29.7773	30.8683	33.3858	31.7057	9.41355	9.01877	8.82552	9.14888	9.89502	9.39707	protein_coding	HGNC:7441	OTTHUMG00000129338.23_2
ENSG00000115355.16_3	CCDC88A	-0.237171	0.00881977	0.0335028	0	133.57	131.867	119.16	115.703	100.612	109.936	3.93524	3.88506	3.51068	3.40884	2.96422	3.23894	protein_coding	HGNC:25523	OTTHUMG00000151915.18_3
ENSG00000163001.11_3	CFAP36	0.0008327	0.989758	0.993132	0	38.4819	35.1422	38.8399	36.5746	39.4766	36.49	10.9792	10.0263	11.0813	10.435	11.2629	10.4108	protein_coding	HGNC:30540	OTTHUMG00000129339.7_3
ENSG00000275052.5_4	PPP4R3B	-0.220272	0.00941291	0.0350498	0	85.781	83.4395	74.0145	68.8451	67.8246	72.088	10.4407	10.1557	9.00858	8.3794	8.25518	8.77409	protein_coding	HGNC:29267	OTTHUMG00000129336.8_4
ENSG00000138035.15_3	PNPT1	-0.00943744	0.860011	0.911191	0	37.7178	40.1333	40.0169	38.6	39.043	39.47	7.12867	7.58521	7.5632	7.29541	7.37914	7.45983	protein_coding	HGNC:23166	OTTHUMG00000129335.8_3
ENSG00000115380.20_4	EFEMP1	1.37108	0.00485678	0.0221577	1	0.783746	1.41014	1.26104	1.53855	3.36542	4.09498	0.197816	0.355916	0.318283	0.388326	0.849425	1.03357	protein_coding	HGNC:3218	OTTHUMG00000129343.7_4
ENSG00000115392.11_4	FANCL	-0.303148	0.00937928	0.0349699	0	17.7127	17.0516	15.2838	14.6649	12.2229	13.6432	7.34356	7.06947	6.33655	6.07997	5.06753	5.65638	protein_coding	HGNC:20748	OTTHUMG00000129349.6_4
ENSG00000233426.3_4	EIF3FP3	-0.0115003	0.937187	0.958704	0	3.89914	4.7685	4.27071	3.58345	4.39776	4.86533	3.59036	4.39089	3.93252	3.29968	4.0495	4.48004	processed_pseudogene	HGNC:37625	OTTHUMG00000152112.1_4
ENSG00000119866.21_5	BCL11A	-0.668023	0.0266749	0.0741555	0	1.78302	1.16893	1.00883	0.779011	0.949751	0.750071	0.070137	0.0459811	0.0396833	0.0306432	0.0373594	0.0295048	protein_coding	HGNC:13221	OTTHUMG00000129420.11_5
ENSG00000115421.13_3	PAPOLG	-0.304625	0.00323293	0.0167861	0	18.0458	18.406	15.9731	13.7301	14.2256	14.4744	2.12829	2.17078	1.88385	1.6193	1.67775	1.70708	protein_coding	HGNC:14982	OTTHUMG00000129419.6_3
ENSG00000162924.14_6	REL	0.17781	0.227068	0.351569	0	3.21336	3.58101	3.61497	4.53774	3.36542	3.87199	0.243991	0.271907	0.274485	0.344551	0.255537	0.294001	protein_coding	HGNC:9954	OTTHUMG00000129418.4_6
ENSG00000162927.14_3	PUS10	-0.117815	0.385529	0.518986	0	6.42672	4.91694	4.94327	4.86882	4.85199	5.27077	0.839984	0.642653	0.646094	0.636364	0.634164	0.6889	protein_coding	HGNC:26505	OTTHUMG00000129423.9_3
ENSG00000162928.9_3	PEX13	-0.334035	0.00181908	0.0112314	0	31.0167	28.3512	26.8349	21.8513	24.2599	22.2589	5.24818	4.79716	4.54059	3.69734	4.1049	3.76631	protein_coding	HGNC:8855	OTTHUMG00000129422.8_3
ENSG00000162929.13_2	KIAA1841	-0.149232	0.0859444	0.172964	0	26.8433	24.7331	22.3624	22.9614	21.6997	21.9751	3.35877	3.09473	2.7981	2.87304	2.71518	2.74963	protein_coding	HGNC:29387	OTTHUMG00000187089.1_2
ENSG00000212978.6_6	AC016747.1	0.063324	0.472004	0.599844	0	9.58129	8.86904	8.72638	8.91968	9.41492	10.055	3.08179	2.8527	2.80681	2.86899	3.02828	3.23416	lncRNA	NA	OTTHUMG00000152156.5_6
ENSG00000237651.6_4	C2orf74	-0.268489	0.156581	0.269172	0	1.41074	1.50291	1.27785	1.34379	0.991044	1.13524	0.931183	0.992022	0.843466	0.886993	0.654154	0.749336	protein_coding	HGNC:34439	OTTHUMG00000187090.3_4
ENSG00000173209.23_5	AHSA2P	0.513056	0.0257496	0.0721699	0	32.2511	30.0026	27.1543	54.9787	29.7726	42.7338	3.55072	3.30316	2.98958	6.05293	3.27784	4.70481	transcribed_unitary_pseudogene	HGNC:20437	OTTHUMG00000129437.11_5
ENSG00000115464.14_3	USP34	-0.0299153	0.692445	0.785449	0	123.616	142.925	131.282	135.665	119.669	134.324	6.82021	7.88553	7.24317	7.48496	6.6024	7.41096	protein_coding	HGNC:20066	OTTHUMG00000152265.9_3
ENSG00000270820.6_6	AC016727.1	-9.47055e-07	0.999996	0.999996	0	2.97823	2.72751	2.35394	2.68759	2.62214	2.73675	1.23629	1.13222	0.977142	1.11565	1.08848	1.13605	lncRNA	NA	OTTHUMG00000185251.2_6
ENSG00000082898.16_2	XPO1	-0.167863	0.0234826	0.0670415	0	271.117	262.36	240.606	234.288	223.067	231.671	23.1566	22.4086	20.5506	20.0109	19.0526	19.7874	protein_coding	HGNC:12825	OTTHUMG00000152316.23_2
ENSG00000170264.13_3	FAM161A	-0.152709	0.223984	0.347779	0	15.8121	13.6747	13.0475	14.7428	11.2731	12.2039	3.00724	2.60073	2.48146	2.80388	2.144	2.32101	protein_coding	HGNC:25808	OTTHUMG00000152165.8_3
ENSG00000115484.15_3	CCT4	-0.0521693	0.414009	0.545878	0	252.758	257.536	277.68	241.474	262.895	255.653	93.5794	95.3485	102.807	89.4017	97.3325	94.6511	protein_coding	HGNC:1617	OTTHUMG00000152166.5_3
ENSG00000173163.10_5	COMMD1	-0.179268	0.0235396	0.0671234	0	24.0218	26.6813	27.0703	22.5329	23.0624	23.1103	10.0426	11.1544	11.317	9.42011	9.64148	9.6615	protein_coding	HGNC:23024	OTTHUMG00000129445.3_5
ENSG00000170340.11_3	B3GNT2	-0.0202785	0.857459	0.909263	0	10.2475	9.35146	7.80162	9.34814	8.98134	8.65623	3.58429	3.27088	2.72879	3.26972	3.14143	3.02771	protein_coding	HGNC:15629	OTTHUMG00000129444.3_3
ENSG00000186889.10_4	TMEM17	0.0631177	0.58202	0.694332	0	3.89914	3.33981	3.54772	3.85611	3.77836	3.62872	1.30624	1.11886	1.18852	1.29183	1.26578	1.21565	protein_coding	HGNC:26623	OTTHUMG00000129455.4_4
ENSG00000115504.14_4	EHBP1	0.161261	0.0156712	0.0503842	0	26.1771	25.3825	25.1703	28.2976	28.3893	29.1109	3.18495	3.08827	3.06245	3.44295	3.4541	3.5419	protein_coding	HGNC:29144	OTTHUMG00000129453.7_4
ENSG00000143951.16_4	WDPCP	-0.311908	0.0105784	0.0380527	0	5.99566	5.73333	5.59901	4.92725	4.58358	4.43961	0.440857	0.421569	0.411692	0.362298	0.337028	0.326442	protein_coding	HGNC:28027	OTTHUMG00000152566.10_4
ENSG00000014641.18_4	MDH1	-0.165309	0.0420872	0.103221	0	133.237	138.472	140.48	110.912	131.664	125.019	26.7008	27.7499	28.1522	22.2268	26.3856	25.0538	protein_coding	HGNC:6970	OTTHUMG00000129512.14_4
ENSG00000169764.15_5	UGP2	-0.420075	4.01406e-05	0.000880968	0	136.842	134.409	132.174	94.7278	103.44	103.348	21.0494	20.6751	20.3313	14.5713	15.9114	15.8972	protein_coding	HGNC:12527	OTTHUMG00000129513.8_5
ENSG00000143952.20_3	VPS54	-0.116391	0.128338	0.231958	0	30.5465	30.2252	26.9526	26.5838	26.0768	28.2392	5.60795	5.54897	4.94815	4.88044	4.78738	5.18435	protein_coding	HGNC:18652	OTTHUMG00000152627.3_3
ENSG00000197329.12_3	PELI1	-0.0975659	0.261408	0.390153	0	15.1067	13.1922	13.4679	12.5616	12.6152	13.8459	3.69267	3.2247	3.29207	3.07054	3.08364	3.38448	protein_coding	HGNC:8827	OTTHUMG00000129511.4_3
ENSG00000225889.8_6	AC012368.1	0.242843	0.214363	0.336663	0	1.13643	1.37303	1.0929	1.4996	1.17686	1.58123	0.167714	0.202632	0.16129	0.22131	0.173681	0.233358	lncRNA	NA	OTTHUMG00000152632.6_6
ENSG00000119862.13_4	LGALSL	-0.383575	0.00173854	0.0108792	0	17.7518	18.6473	16.4271	12.3279	13.5236	14.6365	4.51356	4.74123	4.17674	3.13447	3.4385	3.72147	protein_coding	HGNC:25012	OTTHUMG00000129541.7_4
ENSG00000119844.15_3	AFTPH	-0.0488742	0.500361	0.624736	0	29.508	26.4772	25.9774	25.649	25.8704	27.6918	5.1167	4.59116	4.50449	4.44754	4.48593	4.80177	protein_coding	HGNC:25951	OTTHUMG00000129539.6_3
ENSG00000179833.4_4	SERTAD2	-0.0793087	0.604251	0.713527	0	22.278	32.5446	31.1897	23.3119	29.7107	28.4622	3.55084	5.18721	4.97125	3.71564	4.73552	4.53653	protein_coding	HGNC:30784	OTTHUMG00000152678.3_4
ENSG00000115902.11_3	SLC1A4	0.674102	6.62895e-06	0.000273478	1	41.7345	43.3433	44.977	63.0805	71.7268	72.7569	6.01275	6.24453	6.4799	9.08809	10.3338	10.4822	protein_coding	HGNC:10942	OTTHUMG00000129537.4_3
ENSG00000011523.14_4	CEP68	0.0633908	0.224156	0.348006	0	36.0915	36.6265	36.1329	37.8794	38.1552	37.7063	4.18549	4.24754	4.1903	4.39284	4.42482	4.37276	protein_coding	HGNC:29076	OTTHUMG00000129538.4_4
ENSG00000138069.18_4	RAB1A	-0.0726663	0.274695	0.404331	0	185.552	176.268	164.843	159.133	168.188	173.449	56.0072	53.2048	49.7563	48.0328	50.7662	52.354	protein_coding	HGNC:9758	OTTHUMG00000152725.4_4
ENSG00000172974.11_5	AC007318.1	-0.221791	0.168244	0.2825	0	2.33164	1.96677	2.21943	2.08386	1.83756	1.66232	2.64659	2.23243	2.51921	2.36533	2.08577	1.88686	processed_pseudogene	NA	OTTHUMG00000152724.2_5
ENSG00000138071.13_4	ACTR2	-0.0885187	0.215758	0.338309	0	376.296	351.311	326.037	321.693	328.056	341.161	86.5645	80.8168	75.0028	74.0034	75.4673	78.4819	protein_coding	HGNC:169	OTTHUMG00000129540.3_4
ENSG00000198369.10_5	SPRED2	0.118694	0.142513	0.250524	0	88.1322	78.504	75.4773	93.9098	84.982	83.9269	16.0095	14.2605	13.7107	17.059	15.4372	15.2456	protein_coding	HGNC:17722	OTTHUMG00000152737.6_5
ENSG00000143995.20_6	MEIS1	-0.67948	0.000117501	0.00178312	-1	30.2722	25.8464	24.4809	18.4041	15.2167	16.6638	2.7666	2.36213	2.23734	1.68197	1.39066	1.52292	protein_coding	HGNC:7000	OTTHUMG00000150714.14_6
ENSG00000143971.8_3	ETAA1	-0.300045	0.0122856	0.0424301	0	24.1982	21.6902	19.6722	18.6379	16.0632	18.5085	3.23505	2.89976	2.62997	2.49169	2.14748	2.4744	protein_coding	HGNC:24648	OTTHUMG00000129545.3_3
ENSG00000197223.11_2	C1D	-0.178804	0.0736321	0.154603	0	11.7366	10.8544	10.0883	9.25076	10.2614	9.34549	3.27746	3.0311	2.81717	2.58329	2.86552	2.60974	protein_coding	HGNC:29911	OTTHUMG00000129564.7_2
ENSG00000243667.7_4	WDR92	-0.149759	0.168304	0.282566	0	6.11322	5.32514	6.10342	5.3557	5.40945	5.04778	1.5035	1.30967	1.50109	1.31719	1.33041	1.24146	protein_coding	HGNC:25176	OTTHUMG00000152561.6_4
ENSG00000115946.8_3	PNO1	-0.0233104	0.771167	0.846445	0	28.6655	31.3385	33.3418	29.135	33.1174	29.638	10.8994	11.9158	12.6775	11.078	12.5922	11.2692	protein_coding	HGNC:32790	OTTHUMG00000129563.3_3
ENSG00000221823.11_4	PPP3R1	-0.411274	0.00180951	0.0111952	0	58.2127	55.1996	45.431	38.6974	38.9811	41.7202	17.3046	16.4089	13.505	11.5034	11.5877	12.402	protein_coding	HGNC:9317	OTTHUMG00000129561.9_4
ENSG00000204923.4_3	FBXO48	-0.149057	0.448367	0.579171	0	2.7627	1.89256	2.47163	2.55126	1.87885	1.98668	0.48477	0.332086	0.433696	0.447668	0.329681	0.348601	protein_coding	HGNC:33857	OTTHUMG00000152585.3_3
ENSG00000169621.10_5	APLF	0.0193798	0.881519	0.924653	0	2.7823	2.74606	2.75747	3.0771	2.47761	2.83811	0.390553	0.385466	0.387067	0.431934	0.347784	0.398387	protein_coding	HGNC:28724	OTTHUMG00000129566.7_5
ENSG00000169604.19_3	ANTXR1	-0.660051	5.65821e-07	6.01314e-05	-1	229.128	222.709	226.247	139.482	146.365	143.284	27.9937	27.2095	27.6416	17.0412	17.8821	17.5057	protein_coding	HGNC:21014	OTTHUMG00000129575.7_3
ENSG00000198380.12_2	GFPT1	0.141897	0.0229035	0.0659455	0	47.397	45.8667	47.5327	50.3241	51.4311	53.5997	5.34593	5.17332	5.36123	5.67608	5.80093	6.04553	protein_coding	HGNC:4241	OTTHUMG00000152666.4_2
ENSG00000169599.12_2	NFU1	-0.218055	0.0215278	0.0631954	0	26.6082	24.2878	27.2384	20.9944	24.3838	21.8129	12.1111	11.055	12.398	9.55592	11.0987	9.92849	protein_coding	HGNC:16287	OTTHUMG00000152668.6_2
ENSG00000115977.19_5	AAK1	0.0101079	0.874365	0.919623	0	39.7555	44.7163	41.278	43.4299	40.5089	42.6933	1.60027	1.79996	1.66155	1.74817	1.6306	1.71852	protein_coding	HGNC:19679	OTTHUMG00000129648.10_5
ENSG00000196975.16_3	ANXA4	0.436062	4.69892e-05	0.000977904	0	56.5669	55.7005	55.3007	70.7342	79.5313	76.4465	5.11454	5.03622	5.00006	6.3955	7.19089	6.91198	protein_coding	HGNC:542	OTTHUMG00000129649.6_3
ENSG00000087338.5_3	GMCL1	-0.352497	0.00520494	0.0232877	0	25.8048	21.8943	20.3447	16.8656	18.5614	17.8395	5.2749	4.47553	4.15878	3.44759	3.79424	3.64668	protein_coding	HGNC:23843	OTTHUMG00000129643.4_3
ENSG00000124380.11_4	SNRNP27	-0.192077	0.036257	0.0925238	0	36.4834	32.3961	31.8454	27.0512	30.392	30.7124	19.2321	17.0776	16.7872	14.26	16.0211	16.19	protein_coding	HGNC:30240	OTTHUMG00000152689.3_4
ENSG00000059728.11_4	MXD1	-0.0514027	0.672604	0.770098	0	9.54211	7.84854	7.43171	8.70545	7.39154	7.82507	1.50246	1.2358	1.17016	1.37072	1.16384	1.2321	protein_coding	HGNC:6761	OTTHUMG00000129646.5_4
ENSG00000179818.14_4	PCBP1-AS1	0.276973	0.00716769	0.0291245	0	9.81642	9.77821	10.1724	11.7241	11.3764	12.9742	0.320746	0.319497	0.332376	0.383079	0.371716	0.423925	lncRNA	HGNC:42948	OTTHUMG00000153728.26_4
ENSG00000169564.6_3	PCBP1	-0.137528	0.0503679	0.117945	0	286.224	303.811	309.963	262.137	287.609	268.445	163.557	173.606	177.122	149.793	164.348	153.397	protein_coding	HGNC:8647	OTTHUMG00000129645.1_3
ENSG00000231327.1_5	LINC01816	-0.161161	0.513687	0.635509	0	1.01887	1.2246	1.31148	0.895863	1.44527	0.851433	1.53908	1.84984	1.98109	1.35327	2.18319	1.28615	lncRNA	HGNC:52621	OTTHUMG00000153133.1_5
ENSG00000115998.7_3	C2orf42	-0.0851942	0.265372	0.39448	0	17.8302	16.7918	15.536	15.8918	16.0425	15.3258	4.91191	4.62584	4.27988	4.37792	4.41943	4.22198	protein_coding	HGNC:26056	OTTHUMG00000129642.8_3
ENSG00000116001.16_5	TIA1	-0.420601	0.00920151	0.0344691	0	128.064	100.083	93.5858	89.0215	70.8596	80.3996	19.3831	15.148	14.1646	13.4738	10.7249	12.1688	protein_coding	HGNC:11802	OTTHUMG00000129644.15_5
ENSG00000116005.12_5	PCYOX1	0.250621	0.00653746	0.0274341	0	102.063	93.4589	86.1372	111.827	106.971	116.241	17.4051	15.9377	14.6892	19.0701	18.242	19.8228	protein_coding	HGNC:20588	OTTHUMG00000129671.22_5
ENSG00000143977.14_3	SNRPG	-0.180653	0.00531887	0.023639	0	55.5284	56.0902	58.1086	49.3699	50.5639	49.8291	31.4787	31.7972	32.9414	27.9874	28.6643	28.2478	protein_coding	HGNC:11163	OTTHUMG00000129670.5_3
ENSG00000035141.8_3	FAM136A	-0.0588922	0.297413	0.428235	0	65.1881	63.4563	68.4155	60.9966	64.8308	63.3709	21.1238	20.5626	22.1696	19.7656	21.008	20.535	protein_coding	HGNC:25911	OTTHUMG00000129668.4_3
ENSG00000163235.16_5	TGFA	-0.13833	0.0356487	0.0914254	0	52.9616	48.4643	49.4663	44.7932	45.3816	46.9099	10.7711	9.85648	10.0603	9.10986	9.22952	9.54035	protein_coding	HGNC:11765	OTTHUMG00000129669.40_5
ENSG00000075340.23_4	ADD2	-0.0931702	0.674987	0.771857	0	1.33237	0.909169	1.02564	1.18799	1.03234	0.83116	0.105134	0.0717407	0.0809314	0.093742	0.0814596	0.0655851	protein_coding	HGNC:244	OTTHUMG00000129710.15_4
ENSG00000144043.12_4	TEX261	0.073245	0.167957	0.282122	0	119.619	120.363	124.658	125.382	131.788	126.478	28.5897	28.7674	29.7939	29.967	31.4981	30.229	protein_coding	HGNC:30712	OTTHUMG00000170601.2_4
ENSG00000124357.13_5	NAGK	0.375731	0.000270484	0.00311045	0	75.122	79.2647	75.4941	105.244	91.6096	101.402	8.44353	8.90915	8.48534	11.8292	10.2967	11.3973	protein_coding	HGNC:17174	OTTHUMG00000153239.26_5
ENSG00000124370.11_4	MCEE	0.246733	0.0651368	0.142041	0	3.74239	3.98921	3.48046	4.32351	4.08806	4.8856	2.30443	2.45641	2.14314	2.66226	2.51728	3.00837	protein_coding	HGNC:16732	OTTHUMG00000129709.23_4
ENSG00000124383.9_3	MPHOSPH10	-0.0424089	0.450177	0.580961	0	36.5422	38.5005	39.6302	36.8862	37.0196	37.463	8.39085	8.84054	9.09993	8.46985	8.50049	8.6023	protein_coding	HGNC:7213	OTTHUMG00000129715.7_3
ENSG00000075292.19_4	ZNF638	-0.171161	0.0208098	0.0615471	0	94.9116	93.6259	92.2911	85.8081	76.4756	87.1097	7.60876	7.50568	7.39868	6.87896	6.1308	6.9833	protein_coding	HGNC:17894	OTTHUMG00000129735.21_4
ENSG00000135636.14_4	DYSF	0.342215	0.328415	0.460606	0	3.03702	5.65912	6.45651	3.73926	7.41218	8.14943	0.362024	0.674588	0.76964	0.445733	0.88356	0.971442	protein_coding	HGNC:3097	OTTHUMG00000129757.9_4
ENSG00000144036.15_4	EXOC6B	0.00758676	0.887184	0.927973	0	59.5059	58.5208	58.613	57.3158	58.1413	62.114	5.83563	5.73902	5.74806	5.62085	5.7018	6.0914	protein_coding	HGNC:17085	OTTHUMG00000152723.3_4
ENSG00000116096.6_3	SPR	0.283389	0.0248529	0.0701805	0	11.3643	11.0028	12.7953	12.3863	15.5677	14.8798	7.79446	7.54651	8.77594	8.49539	10.6774	10.2056	protein_coding	HGNC:11257	OTTHUMG00000129777.3_3
ENSG00000144040.12_3	SFXN5	0.462494	1.57583e-05	0.000491926	0	165.194	152.87	163.33	220.402	223.398	219.528	14.8998	13.7883	14.7316	19.8793	20.1495	19.8005	protein_coding	HGNC:16073	OTTHUMG00000129775.8_3
ENSG00000135631.16_3	RAB11FIP5	0.633471	4.51194e-06	0.000221117	1	33.2308	32.5074	33.779	48.2792	54.7758	51.3495	4.70825	4.60576	4.78591	6.84036	7.76081	7.27536	protein_coding	HGNC:24845	OTTHUMG00000129779.4_3
ENSG00000135632.12_4	SMYD5	0.146817	0.0720427	0.152091	0	27.5879	30.7077	30.0799	30.2841	34.6865	32.9018	8.20091	9.12832	8.94172	9.0024	10.3111	9.78055	protein_coding	HGNC:16258	OTTHUMG00000150482.5_4
ENSG00000135617.4_3	PRADC1	-0.0671078	0.33532	0.468461	0	17.9282	16.532	18.4448	16.6514	16.9097	16.9476	12.7694	11.775	13.1373	11.86	12.0439	12.0709	protein_coding	HGNC:16047	OTTHUMG00000129773.3_3
ENSG00000135624.16_3	CCT7	0.0195802	0.770813	0.846193	0	305.132	315.556	335.806	306.346	343.438	319.814	84.9713	87.8741	93.5132	85.3095	95.6386	89.0599	protein_coding	HGNC:1622	OTTHUMG00000152765.8_3
ENSG00000163013.11_2	FBXO41	0.248874	0.150452	0.26119	0	2.03774	1.76268	2.30349	2.29808	2.2092	2.75702	0.254368	0.220032	0.287541	0.286866	0.275771	0.344154	protein_coding	HGNC:29409	OTTHUMG00000164127.2_2
ENSG00000116127.18_5	ALMS1	-0.0119489	0.893576	0.932519	0	30.0371	32.1735	31.0888	34.6076	27.3157	30.5908	2.03228	2.17682	2.10344	2.34151	1.84815	2.06974	protein_coding	HGNC:428	OTTHUMG00000152812.11_5
ENSG00000144034.14_2	TPRKB	-0.251001	0.0490614	0.115645	0	22.4347	18.2019	16.6961	16.5345	15.1547	16.4408	10.9598	8.89201	8.15639	8.07744	7.40338	8.03163	protein_coding	HGNC:24259	OTTHUMG00000129815.2_2
ENSG00000144048.10_2	DUSP11	0.0624107	0.470833	0.598689	0	16.2627	15.6229	13.7369	15.0544	15.8774	16.684	4.58881	4.40826	3.8761	4.24785	4.48007	4.70768	protein_coding	HGNC:3066	OTTHUMG00000129816.3_2
ENSG00000124356.16_4	STAMBP	0.164598	0.00998923	0.0364999	0	71.9283	72.9377	72.2827	78.8944	84.7962	79.7103	9.34862	9.47981	9.39468	10.254	11.0211	10.3601	protein_coding	HGNC:16950	OTTHUMG00000129817.5_4
ENSG00000114956.20_3	DGUOK	-0.0846958	0.316248	0.448136	0	48.8078	54.4945	56.3936	47.4028	55.1268	48.1059	33.5449	37.4533	38.7585	32.5793	37.8879	33.0625	protein_coding	HGNC:2858	OTTHUMG00000129819.4_3
ENSG00000235499.1_6	AC073046.1	0.0235365	0.910794	0.943359	0	0.80334	0.946278	1.24422	1.01271	1.09428	0.952794	2.05985	2.42635	3.19032	2.5967	2.80584	2.44306	lncRNA	NA	OTTHUMG00000152824.2_6
ENSG00000187605.15_2	TET3	0.172954	0.0954844	0.186695	0	50.3361	59.4114	55.2671	69.9552	56.6547	59.4178	4.10204	4.84161	4.50388	5.70086	4.61696	4.84213	protein_coding	HGNC:28313	OTTHUMG00000152823.8_2
ENSG00000257800.1_4	FNBP1P1	0.097727	0.617767	0.725476	0	1.15603	1.05761	1.32829	1.36327	1.01169	1.41905	0.579752	0.530394	0.666145	0.683686	0.507367	0.711662	processed_pseudogene	HGNC:44528	OTTHUMG00000170236.1_4
ENSG00000163170.12_3	BOLA3	0.180082	0.0271204	0.0749882	0	14.127	13.3778	13.6528	14.7623	15.6502	16.2178	4.59864	4.35475	4.44428	4.80543	5.09448	5.27922	protein_coding	HGNC:24415	OTTHUMG00000152834.3_3
ENSG00000225439.3_6	BOLA3-AS1	0.0817879	0.465235	0.594056	0	5.62338	6.71672	6.2043	6.30999	7.16442	6.16275	1.50882	1.80218	1.66469	1.69305	1.9223	1.65354	lncRNA	HGNC:42922	OTTHUMG00000152835.3_6
ENSG00000114978.18_3	MOB1A	-0.190981	0.0280279	0.0768449	0	123.342	112.737	101.354	97.8049	97.5972	100.145	19.1525	17.5057	15.7382	15.1871	15.1548	15.5504	protein_coding	HGNC:16015	OTTHUMG00000152833.3_3
ENSG00000065911.12_3	MTHFD2	0.609431	5.46538e-06	0.000241059	1	38.5407	38.5377	37.4612	54.1608	61.1144	59.4786	7.99268	7.99205	7.76881	11.232	12.6741	12.3348	protein_coding	HGNC:7434	OTTHUMG00000129814.5_3
ENSG00000204843.12_5	DCTN1	0.121341	0.0667454	0.144423	0	213.394	229.203	236.302	243.986	253.294	241.219	20.442	21.9565	22.6364	23.3726	24.2642	23.1075	protein_coding	HGNC:2711	OTTHUMG00000129963.31_5
ENSG00000284308.1_4	C2orf81	0.594056	0.00575308	0.0250995	1	0.881714	0.816397	0.807064	1.26589	1.15622	1.35824	0.294395	0.272587	0.26947	0.422669	0.386049	0.453502	protein_coding	HGNC:34350	OTTHUMG00000164184.3_4
ENSG00000005448.16_4	WDR54	0.19294	0.0354928	0.0911519	0	31.2127	25.8464	28.2472	33.7117	32.5393	31.2395	10.9135	9.0372	9.87665	11.7873	11.3774	10.9229	protein_coding	HGNC:25770	OTTHUMG00000129951.4_4
ENSG00000114993.16_4	RTKN	0.409879	0.00576339	0.0251365	0	43.7722	32.6188	36.3179	55.1735	46.5171	47.9843	8.43395	6.28493	6.99766	10.6307	8.96284	9.24553	protein_coding	HGNC:10466	OTTHUMG00000129955.6_4
ENSG00000115274.15_5	INO80B	0.362674	0.0415637	0.102267	0	1.43034	1.4658	1.44599	2.12281	1.81691	1.64205	0.991911	1.01651	1.00277	1.47213	1.26	1.13873	protein_coding	HGNC:13324	OTTHUMG00000129959.5_5
ENSG00000239779.7_7	WBP1	0.0315584	0.806108	0.871557	0	12.4812	10.9286	11.652	14.0806	9.95173	11.7781	5.27298	4.61706	4.92268	5.94873	4.20437	4.97598	protein_coding	HGNC:12737	OTTHUMG00000129958.4_7
ENSG00000115275.13_6	MOGS	0.237768	0.002589	0.0143725	0	91.4436	93.0878	96.545	117.261	105.36	108.821	25.5144	25.9732	26.9378	32.7178	29.3974	30.3631	protein_coding	HGNC:24862	OTTHUMG00000152886.9_6
ENSG00000135637.13_5	CCDC142	0.234141	0.0857824	0.17274	0	9.48333	8.83193	8.00338	12.0552	9.68333	9.18331	1.93656	1.80354	1.63434	2.46175	1.9774	1.87529	protein_coding	HGNC:25889	OTTHUMG00000129962.2_5
ENSG00000115282.19_6	TTC31	0.0464342	0.611807	0.720086	0	33.7011	31.6168	30.7357	37.3536	29.6694	32.1314	6.61584	6.20668	6.0337	7.33286	5.82438	6.3077	protein_coding	HGNC:25759	OTTHUMG00000152887.1_6
ENSG00000257702.3_5	LBX2-AS1	0.169687	0.475757	0.603098	0	1.05806	0.909169	0.958388	0.759536	1.23881	1.29742	0.507705	0.436262	0.459879	0.364461	0.594436	0.622563	lncRNA	HGNC:25136	OTTHUMG00000170509.3_5
ENSG00000115289.14_4	PCGF1	0.0504357	0.483319	0.60918	0	12.4812	12.1903	11.7529	12.25	12.3674	13.0958	7.15663	6.98985	6.73903	7.02406	7.0914	7.50908	protein_coding	HGNC:17615	OTTHUMG00000129954.5_4
ENSG00000115307.17_3	AUP1	0.250859	0.00258412	0.0143667	0	119.717	115.446	117.714	150.641	135.236	133.999	48.7646	47.0248	47.9485	61.361	55.086	54.5822	protein_coding	HGNC:891	OTTHUMG00000129964.4_3
ENSG00000115317.11_2	HTRA2	-0.0119674	0.861997	0.912165	0	41.0095	35.4762	38.8736	37.7431	39.6418	37.017	13.6653	11.8214	12.9535	12.5768	13.2095	12.3349	protein_coding	HGNC:14348	OTTHUMG00000129957.4_2
ENSG00000115318.12_5	LOXL3	-0.512299	1.88274e-05	0.000550058	0	37.1104	41.0425	40.2859	27.6354	27.1711	28.2392	8.21208	9.08221	8.91479	6.11539	6.01264	6.24899	protein_coding	HGNC:13869	OTTHUMG00000129953.5_5
ENSG00000115325.13_2	DOK1	-0.00673128	0.913821	0.94542	0	22.1408	21.1336	22.7491	22.6303	21.8236	21.2655	7.26167	6.93131	7.46117	7.4222	7.15763	6.9746	protein_coding	HGNC:2990	OTTHUMG00000129956.3_2
ENSG00000135622.13_4	SEMA4F	0.0879781	0.129326	0.23322	0	35.249	35.3463	36.3347	36.6525	37.9694	39.0443	5.66067	5.67629	5.83502	5.88606	6.09754	6.27016	protein_coding	HGNC:10734	OTTHUMG00000129952.10_4
ENSG00000272711.1_6	AC019069.1	-0.754602	0.00425985	0.020344	-1	1.29318	1.59569	1.49643	0.779011	1.07363	0.750071	0.970128	1.19706	1.1226	0.584405	0.805425	0.562694	lncRNA	NA	OTTHUMG00000185987.1_6
ENSG00000159399.9_3	HK2	-0.767724	2.06526e-05	0.000579217	-1	15.2635	17.9607	18.1757	10.3609	9.41492	10.4199	2.51706	2.96186	2.99732	1.70858	1.55259	1.71832	protein_coding	HGNC:4923	OTTHUMG00000129972.7_3
ENSG00000115350.11_2	POLE4	0.0914631	0.256763	0.384652	0	32.4667	36.7379	37.6125	35.6398	40.385	37.8279	15.0938	17.0794	17.4861	16.5689	18.775	17.5862	protein_coding	HGNC:18755	OTTHUMG00000129971.2_2
ENSG00000115353.11_3	TACR1	-0.0469144	0.726175	0.8124	0	5.64297	5.90032	5.86803	6.73845	5.09975	5.00723	1.10042	1.15061	1.14431	1.31405	0.994491	0.97645	protein_coding	HGNC:11526	OTTHUMG00000129973.4_3
ENSG00000115363.14_4	EVA1A	0.0736647	0.524649	0.645508	0	14.5973	18.2762	18.7642	16.7098	20.0893	17.5963	5.31777	6.65798	6.83579	6.08736	7.3185	6.4103	protein_coding	HGNC:25816	OTTHUMG00000129991.4_4
ENSG00000115364.14_6	MRPL19	-0.0827024	0.142413	0.250413	0	63.0328	60.2835	61.236	56.751	60.4124	57.1068	7.04513	6.73785	6.8443	6.34302	6.75225	6.38279	protein_coding	HGNC:14052	OTTHUMG00000129990.6_6
ENSG00000005436.13_5	GCFC2	-0.29808	0.0217371	0.0635881	0	10.0907	9.05459	7.88569	7.0111	7.49477	7.46017	1.84643	1.65683	1.44294	1.28291	1.37141	1.36508	protein_coding	HGNC:1317	OTTHUMG00000129989.4_5
ENSG00000163541.12_5	SUCLG1	-0.192058	0.0161316	0.0514025	0	79.4327	78.7081	85.7337	67.5208	76.4343	69.5539	19.0852	18.9111	20.5992	16.2232	18.3648	16.7117	protein_coding	HGNC:11449	OTTHUMG00000130023.7_5
ENSG00000034510.6_3	TMSB10	0.14142	0.0887932	0.176992	0	1477.5	1522.25	1648.98	1600.56	1810.64	1716.35	3204.99	3302.05	3576.97	3471.92	3927.63	3723.09	protein_coding	HGNC:11879	OTTHUMG00000130027.7_3
ENSG00000176407.18_4	KCMF1	-0.00296609	0.95697	0.972557	0	63.1503	62.9182	62.5306	59.5749	65.8012	62.8438	7.92549	7.89637	7.84772	7.47677	8.25818	7.88703	protein_coding	HGNC:20589	OTTHUMG00000153004.14_4
ENSG00000152284.5_4	TCF7L1	-0.217391	0.0484408	0.114531	0	11.9129	12.8211	14.5103	11.1009	12.0783	10.6024	2.68854	2.89351	3.27473	2.50528	2.72587	2.39277	protein_coding	HGNC:11640	OTTHUMG00000130026.6_4
ENSG00000152291.14_3	TGOLN2	0.102027	0.0801318	0.164659	0	262.202	275.924	270.972	292.012	282.799	293.582	37.7161	39.6898	38.9775	42.0041	40.6787	42.2299	protein_coding	HGNC:15450	OTTHUMG00000153017.5_3
ENSG00000042445.14_4	RETSAT	0.470271	3.21889e-05	0.000766395	0	41.421	45.477	40.7903	58.6401	58.0793	60.1679	10.2299	11.2317	10.0742	14.4826	14.3441	14.8599	protein_coding	HGNC:25991	OTTHUMG00000154611.6_4
ENSG00000115459.18_3	ELMOD3	0.176213	0.0889622	0.177237	0	14.95	16.0125	16.1749	19.67	15.5883	18.0017	2.05951	2.20588	2.22826	2.70975	2.14744	2.47992	protein_coding	HGNC:26158	OTTHUMG00000130170.17_3
ENSG00000042493.16_3	CAPG	0.0483136	0.509494	0.632611	0	55.0386	53.1586	58.3272	53.5765	62.539	56.1135	22.7526	21.9754	24.1121	22.1482	25.8532	23.197	protein_coding	HGNC:1474	OTTHUMG00000130183.23_3
ENSG00000286532.1_1	PARTICL	0.0605324	0.735699	0.819487	0	1.33237	1.41014	1.54687	1.75278	1.48657	1.2366	1.1057	1.17024	1.28371	1.45459	1.23366	1.02623	lncRNA	HGNC:50886	OTTHUMG00000194079.1_1
ENSG00000168906.13_3	MAT2A	0.0634084	0.405699	0.537669	0	217.039	223.303	227.138	253.237	210.184	234.043	48.3922	49.7889	50.6439	56.4631	46.8638	52.1834	protein_coding	HGNC:6904	OTTHUMG00000130174.7_3
ENSG00000115486.12_3	GGCX	0.299367	0.000322361	0.00350369	0	63.072	66.0911	65.0527	80.9393	76.2897	81.7781	6.93022	7.26196	7.14786	8.89345	8.38257	8.98561	protein_coding	HGNC:4247	OTTHUMG00000130173.8_3
ENSG00000168899.5_3	VAMP5	0.194286	0.112883	0.211489	0	20.1227	20.8181	21.9589	19.8843	27.2537	24.874	25.4717	26.3521	27.796	25.17	34.4984	31.4861	protein_coding	HGNC:12646	OTTHUMG00000130169.3_3
ENSG00000168894.9_5	RNF181	0.203214	0.0172406	0.0537143	0	44.6539	45.477	49.2981	50.1294	57.6044	52.8294	36.6016	37.2763	40.4083	41.0897	47.2167	43.3028	protein_coding	HGNC:28037	OTTHUMG00000130182.4_5
ENSG00000168890.14_5	TMEM150A	0.671259	1.1538e-06	9.11904e-05	1	23.0029	23.9724	24.5146	37.8794	38.5888	37.4022	7.43229	7.74552	7.9207	12.2389	12.4681	12.0847	protein_coding	HGNC:24677	OTTHUMG00000130168.5_5
ENSG00000168883.20_5	USP39	-0.0949262	0.0950458	0.18613	0	74.5342	73.3273	77.764	68.1246	72.0365	71.1149	18.8551	18.5498	19.6721	17.2336	18.2233	17.9901	protein_coding	HGNC:20071	OTTHUMG00000153090.11_5
ENSG00000168887.11_5	C2orf68	-0.00494772	0.92891	0.954235	0	30.233	29.4831	29.5587	29.0182	29.2564	30.6921	5.20093	5.07192	5.08493	4.99195	5.03293	5.27991	protein_coding	HGNC:34353	OTTHUMG00000153088.3_5
ENSG00000168874.13_3	ATOH8	-2.04831	2.40354e-05	0.000641868	-1	9.79682	17.6268	19.0501	3.17447	4.17064	3.91254	1.05388	1.89617	2.04928	0.341488	0.448649	0.420884	protein_coding	HGNC:24126	OTTHUMG00000130178.3_3
ENSG00000115525.18_6	ST3GAL5	0.138815	0.0350078	0.09045	0	107.216	101.048	102.312	107.679	118.45	115.815	6.5777	6.19925	6.27682	6.60607	7.2669	7.10522	protein_coding	HGNC:10872	OTTHUMG00000130171.17_6
ENSG00000068654.16_4	POLR1A	0.130682	0.183836	0.300741	0	59.6823	76.2775	74.3676	78.8749	74.2251	77.2168	4.41469	5.64224	5.50097	5.83437	5.49043	5.71173	protein_coding	HGNC:17264	OTTHUMG00000153165.4_4
ENSG00000132300.19_3	PTCD3	-0.0378877	0.497083	0.621832	0	114.858	125.076	124.305	116.462	117.026	121.329	11.3462	12.3556	12.2794	11.5047	11.5604	11.9855	protein_coding	HGNC:24717	OTTHUMG00000153168.6_3
ENSG00000132305.20_2	IMMT	0.0820608	0.126013	0.228785	0	117.777	122.367	125.263	127.018	130.095	129.702	29.5478	30.6991	31.4257	31.866	32.638	32.5393	protein_coding	HGNC:6047	OTTHUMG00000153170.5_2
ENSG00000273080.1_6	AC009309.1	0.133752	0.63082	0.736441	0	0.80334	0.70507	0.907947	0.720586	0.681343	1.25688	1.74639	1.53276	1.9738	1.56649	1.48118	2.73234	lncRNA	NA	OTTHUMG00000185997.1_6
ENSG00000132313.15_5	MRPL35	-0.252712	0.00165274	0.0105598	0	56.077	55.3109	53.2494	43.6246	47.2398	47.3153	14.6607	14.4604	13.9214	11.4051	12.3503	12.37	protein_coding	HGNC:14489	OTTHUMG00000037385.5_5
ENSG00000068615.18_5	REEP1	-1.15338	1.79457e-05	0.000533418	-1	7.66112	6.77238	5.98572	2.68759	3.24154	3.24355	1.31049	1.15846	1.0239	0.459731	0.554489	0.554833	protein_coding	HGNC:25786	OTTHUMG00000130205.9_5
ENSG00000115548.17_3	KDM3A	-0.169075	0.0139757	0.0466528	0	71.8891	73.8283	73.5605	67.6377	61.135	66.2496	5.4056	5.55142	5.53128	5.08592	4.59696	4.98154	protein_coding	HGNC:20815	OTTHUMG00000130204.8_3
ENSG00000115561.16_4	CHMP3	-0.0352644	0.538757	0.657833	0	105.551	104.221	103.674	95.4679	106.847	103.571	15.0379	14.8483	14.7705	13.6013	15.2225	14.7558	protein_coding	HGNC:29865	OTTHUMG00000153189.27_4
ENSG00000239305.7_4	RNF103	-0.337399	0.00241604	0.0137586	0	32.6234	28.3327	27.995	23.0003	22.4017	24.9754	4.29595	3.73093	3.68647	3.02875	2.94992	3.28883	protein_coding	HGNC:12859	OTTHUMG00000153197.5_4
ENSG00000153561.13_3	RMND5A	-0.0944555	0.181961	0.298579	0	32.0552	30.652	29.1047	28.9403	27.0472	29.9826	4.79438	4.5845	4.35309	4.32849	4.04536	4.48438	protein_coding	HGNC:25850	OTTHUMG00000130262.4_3
ENSG00000285793.1_2	AC125232.2	-0.639629	0.00972037	0.035843	-1	1.01887	1.05761	1.02564	0.798487	0.557462	0.628438	0.459571	0.477043	0.462627	0.360165	0.251449	0.283463	lncRNA	NA	OTTHUMG00000193336.1_2
ENSG00000204745.4_5	AC083899.1	0.0581122	0.733349	0.818003	0	1.5283	1.68846	1.76545	1.55802	1.56915	2.06776	0.402715	0.444916	0.465205	0.410546	0.413479	0.544866	unprocessed_pseudogene	NA	OTTHUMG00000153253.4_5
ENSG00000222041.11_4	CYTOR	0.201386	0.0058346	0.0253263	0	32.643	31.0231	32.9047	38.0547	37.1435	35.8413	1.84497	1.75341	1.85976	2.15083	2.09933	2.02573	lncRNA	HGNC:28717	OTTHUMG00000130273.15_4
ENSG00000234231.4_5	AC093616.1	-0.124675	0.300494	0.431491	0	4.56532	4.08199	4.30434	4.26509	3.57189	4.03417	2.20547	1.97197	2.07939	2.06043	1.72555	1.94887	transcribed_unprocessed_pseudogene	NA	OTTHUMG00000153245.7_5
ENSG00000172086.8_3	KRCC1	-0.235231	0.0073408	0.0295991	0	22.6503	20.781	20.0253	17.6641	17.9627	18.2653	12.5347	11.5003	11.0821	9.77537	9.9406	10.1081	protein_coding	HGNC:28039	OTTHUMG00000130315.2_3
ENSG00000172071.13_4	EIF2AK3	-0.0258621	0.64268	0.746399	0	36.4834	36.107	38.0497	35.4645	35.6982	37.5238	6.66972	6.60092	6.95607	6.48345	6.52619	6.85994	protein_coding	HGNC:3255	OTTHUMG00000155046.4_4
ENSG00000234028.3_6	EIF2AK3-DT	0.00796849	0.9784	0.986117	0	1.01887	0.779288	0.907947	0.70111	0.681343	1.33797	0.237887	0.181949	0.211989	0.163696	0.159081	0.31239	lncRNA	HGNC:54066	OTTHUMG00000155049.3_6
ENSG00000153574.9_3	RPIA	-0.0143623	0.859072	0.910267	0	20.1619	19.4265	21.7067	18.5794	21.803	20.333	11.1207	10.7151	11.9728	10.2479	12.0259	11.2151	protein_coding	HGNC:10297	OTTHUMG00000130333.3_3
ENSG00000144029.12_4	MRPS5	0.117519	0.0719169	0.151958	0	48.4159	49.7817	50.4583	57.0042	53.0621	51.2076	5.78446	5.94763	6.02847	6.81053	6.33956	6.11799	protein_coding	HGNC:14498	OTTHUMG00000130394.3_4
ENSG00000144026.12_5	ZNF514	0.31622	0.0278448	0.0764656	0	11.5994	13.7303	12.2741	17.6641	13.0075	16.1367	1.23609	1.46316	1.30798	1.88236	1.38613	1.71959	protein_coding	HGNC:25894	OTTHUMG00000130391.5_5
ENSG00000275111.5_4	ZNF2	0.0156183	0.867866	0.916118	0	8.15096	8.34952	7.21313	7.96539	7.65994	8.33188	2.03978	2.08947	1.80509	1.99334	1.9169	2.08505	protein_coding	HGNC:12991	OTTHUMG00000155150.5_4
ENSG00000233757.6_5	AC092835.1	-0.249797	0.170587	0.285572	0	2.11611	1.70701	1.54687	1.61645	1.48657	1.39878	0.918452	0.740891	0.671386	0.701584	0.645211	0.60711	protein_coding	NA	OTTHUMG00000155176.5_5
ENSG00000115041.13_4	KCNIP3	3.94117	1.19663e-08	6.89244e-06	1	0.999276	0.593743	0.57167	11.1204	11.108	10.8254	0.127442	0.0757229	0.0729078	1.41824	1.41665	1.38061	protein_coding	HGNC:15523	OTTHUMG00000130392.5_4
ENSG00000115042.10_5	FAHD2A	1.46204	4.16343e-08	1.52816e-05	1	31.3302	35.9957	38.3187	101.388	94.2111	95.5834	5.51783	6.3395	6.74863	17.8563	16.5923	16.834	protein_coding	HGNC:24252	OTTHUMG00000130397.5_5
ENSG00000272913.1_6	AC009237.14	0.368366	0.0176463	0.0545261	0	3.05661	3.63668	3.41321	4.01191	4.87263	4.17607	1.91757	2.28148	2.14128	2.51688	3.05686	2.61987	lncRNA	NA	OTTHUMG00000186024.1_6
ENSG00000229689.3_5	AC009237.3	1.02657	0.000159073	0.00218814	1	1.48912	1.35448	1.79908	3.3108	2.76666	3.40573	0.29914	0.272093	0.361406	0.665086	0.555778	0.684156	transcribed_unprocessed_pseudogene	NA	OTTHUMG00000155156.3_5
ENSG00000232931.6_6	LINC00342	0.527695	0.0442075	0.107115	0	4.40857	3.85933	3.5309	7.69274	3.98482	5.29104	0.512684	0.448812	0.410618	0.894609	0.463405	0.615309	lncRNA	HGNC:42470	OTTHUMG00000155186.10_6
ENSG00000174501.14_3	ANKRD36C	0.508319	0.0125717	0.0431065	0	1.64587	1.91111	1.66457	2.80444	2.04403	2.57457	0.19196	0.222896	0.194141	0.327087	0.238398	0.300276	protein_coding	HGNC:32946	OTTHUMG00000155211.2_3
ENSG00000231584.8_2	FAHD2CP	0.977011	0.000816316	0.00654633	1	0.685778	0.482416	0.588484	1.18799	1.07363	1.19606	0.320457	0.225428	0.274993	0.555137	0.501697	0.558907	transcribed_unprocessed_pseudogene	HGNC:44135	OTTHUMG00000155210.3_2
ENSG00000084090.13_4	STARD7	-0.100011	0.0729383	0.153547	0	250.328	239.872	244.305	227.062	230.975	227.272	56.7124	54.3435	55.3477	51.4414	52.3279	51.4888	protein_coding	HGNC:18063	OTTHUMG00000130457.4_4
ENSG00000204685.7_6	STARD7-AS1	0.0302838	0.825234	0.886364	0	4.72207	4.04488	4.6238	4.47932	3.94353	5.2505	1.07004	0.916582	1.04777	1.01503	0.893616	1.18978	lncRNA	HGNC:40827	OTTHUMG00000155209.3_6
ENSG00000135956.8_2	TMEM127	0.121548	0.0331234	0.0867509	0	106.55	103.868	107.07	111.671	118.285	115.45	16.7348	16.3135	16.8165	17.5391	18.5779	18.1326	protein_coding	HGNC:26038	OTTHUMG00000130454.4_2
ENSG00000144021.2_2	CIAO1	0.0948304	0.0922128	0.182306	0	87.8971	92.3642	94.0734	100.2	97.1636	95.624	21.8053	22.9135	23.3375	24.8574	24.1041	23.7221	protein_coding	HGNC:14280	OTTHUMG00000130452.2_2
ENSG00000144028.15_4	SNRNP200	0.101346	0.168238	0.2825	0	298.411	320.009	323.33	352.6	310.796	346.898	26.6724	28.6029	28.8997	31.5159	27.7794	31.0063	protein_coding	HGNC:30859	OTTHUMG00000130455.7_4
ENSG00000230747.1_7	AC021188.1	0.052377	0.814184	0.87775	0	1.01887	0.834952	0.823878	1.16852	0.805223	0.790616	1.37685	1.12831	1.11335	1.57908	1.08814	1.0684	lncRNA	NA	OTTHUMG00000155228.1_7
ENSG00000198885.9_4	ITPRIPL1	-0.107413	0.399199	0.531942	0	15.6357	12.6727	12.7785	14.6259	12.2022	11.2713	3.36108	2.72414	2.74689	3.14401	2.62301	2.4229	protein_coding	HGNC:29371	OTTHUMG00000155230.4_4
ENSG00000121152.10_5	NCAPH	-0.196258	0.0273492	0.0754225	0	68.8521	60.5989	63.8589	61.1914	54.7139	52.7888	10.5198	9.25881	9.7569	9.34933	8.35965	8.06552	protein_coding	HGNC:1112	OTTHUMG00000130451.6_5
ENSG00000196843.16_3	ARID5A	-0.165084	0.280359	0.410248	0	31.9572	21.783	23.573	25.6295	22.3398	20.9209	8.97423	6.11709	6.61977	7.19727	6.27346	5.87501	protein_coding	HGNC:17361	OTTHUMG00000155229.6_3
ENSG00000114982.19_5	KANSL3	0.0667436	0.213435	0.335629	0	73.8876	75.2199	79.2604	78.7191	81.0798	79.4062	8.18972	8.33738	8.78524	8.72524	8.9869	8.8014	protein_coding	HGNC:25473	OTTHUMG00000155249.7_5
ENSG00000114988.11_4	LMAN2L	-0.143967	0.044435	0.107476	0	39.2069	40.7642	43.1107	36.1072	39.1256	36.1859	14.4728	15.0477	15.9139	13.3286	14.4428	13.3577	protein_coding	HGNC:19263	OTTHUMG00000130453.2_4
ENSG00000158158.12_3	CNNM4	0.0783798	0.273019	0.40287	0	16.0864	15.4744	16.2253	17.8588	16.4348	16.1569	3.16163	3.04136	3.18894	3.50999	3.23011	3.1755	protein_coding	HGNC:105	OTTHUMG00000130532.3_3
ENSG00000168763.16_3	CNNM3	-0.0400112	0.473795	0.601632	0	38.5603	36.7564	36.4524	36.9836	35.1614	36.5508	6.55008	6.24366	6.19201	6.28224	5.97272	6.20873	protein_coding	HGNC:104	OTTHUMG00000130531.4_3
ENSG00000213337.9_4	ANKRD39	-0.105415	0.227414	0.351904	0	7.79827	7.57023	7.7848	6.8553	7.41218	7.25745	1.48652	1.44305	1.48395	1.30677	1.41292	1.38343	protein_coding	HGNC:28640	OTTHUMG00000130530.3_4
ENSG00000168758.11_4	SEMA4C	-0.0633604	0.319161	0.451067	0	57.3898	55.3295	55.637	56.8873	50.0684	54.1471	9.16184	8.83293	8.88202	9.08163	7.99303	8.64417	protein_coding	HGNC:10731	OTTHUMG00000130535.4_4
ENSG00000144199.11_2	FAHD2B	0.173136	0.374162	0.508042	0	1.15603	0.927724	1.10971	1.26589	1.34204	0.993338	0.434269	0.348506	0.416872	0.475542	0.504147	0.373155	protein_coding	HGNC:25318	OTTHUMG00000130533.2_2
ENSG00000135976.19_6	ANKRD36	0.362443	0.140617	0.247964	0	2.25327	2.13377	2.1858	3.91453	2.29179	2.22994	0.202414	0.191679	0.196353	0.351647	0.205874	0.200318	protein_coding	HGNC:24079	OTTHUMG00000155256.8_6
ENSG00000230606.6	AC159540.1	0.685761	0.0247965	0.0700501	0	1.19521	1.00194	0.722995	1.8891	1.13557	1.64205	0.220723	0.185031	0.133517	0.348865	0.209708	0.303241	lincRNA	NA	OTTHUMG00000152989.4
ENSG00000196912.12_3	ANKRD36B	0.188574	0.452897	0.583809	0	1.19521	1.44725	1.37873	2.04491	1.05298	1.47987	0.176519	0.213742	0.203623	0.302009	0.155514	0.21856	protein_coding	HGNC:29333	OTTHUMG00000130547.9_3
ENSG00000135940.6_2	COX5B	0.0913833	0.182867	0.299731	0	58.9965	57.389	61.4545	58.6985	67.2052	63.5939	40.9413	39.8258	42.6472	40.7346	46.6379	44.1318	protein_coding	HGNC:2269	OTTHUMG00000130548.2_2
ENSG00000115073.7_2	ACTR1B	0.163339	0.0221683	0.0645046	0	80.2556	87.6514	87.1293	91.826	100.178	93.6373	27.7509	30.3082	30.1277	31.7517	34.6397	32.378	protein_coding	HGNC:168	OTTHUMG00000130549.4_2
ENSG00000228486.10_7	C2orf92	0.981251	0.0143452	0.0474812	1	1.05806	0.70507	0.874319	2.41494	0.991044	1.78395	0.162753	0.108456	0.13449	0.371471	0.152445	0.274412	protein_coding	HGNC:49272	OTTHUMG00000153062.10_7
ENSG00000075568.17_3	TMEM131	0.110223	0.155326	0.267512	0	83.8608	80.8975	74.0817	89.6447	78.8912	89.218	6.43006	6.20285	5.68024	6.87354	6.04901	6.84082	protein_coding	HGNC:30366	OTTHUMG00000153061.10_3
ENSG00000222000.7_6	AC092675.1	-0.786322	0.00736219	0.0296592	-1	1.43034	2.39353	1.63094	1.03219	1.17686	0.952794	1.22881	2.0563	1.40115	0.886761	1.01105	0.818551	lncRNA	NA	OTTHUMG00000153102.1_6
ENSG00000040933.15_3	INPP4A	-0.182447	0.00724555	0.029371	0	45.2417	47.4252	44.8929	40.1775	39.5798	41.4567	3.43078	3.59636	3.40433	3.04675	3.00143	3.14375	protein_coding	HGNC:6074	OTTHUMG00000153106.4_3
ENSG00000183513.9_3	COA5	-0.0300651	0.683673	0.778479	0	25.3346	22.655	21.858	22.2797	22.5669	23.536	9.19252	8.22025	7.93105	8.08408	8.18828	8.53992	protein_coding	HGNC:33848	OTTHUMG00000153101.4_3
ENSG00000115446.11_2	UNC50	0.0190046	0.735214	0.819081	0	38.7758	36.608	35.8303	37.2757	37.0816	38.3145	17.3883	16.4161	16.0674	16.7156	16.6285	17.1814	protein_coding	HGNC:16046	OTTHUMG00000130562.2_2
ENSG00000071073.13_3	MGAT4A	-0.657156	0.00103516	0.00765339	-1	4.40857	4.00777	3.37958	2.39546	2.47761	2.59484	0.45751	0.415916	0.350724	0.248595	0.25712	0.269286	protein_coding	HGNC:7047	OTTHUMG00000130563.6_3
ENSG00000135951.15_4	TSGA10	0.250164	0.117816	0.218042	0	2.21408	2.65329	2.03447	2.92129	2.70472	2.57457	0.300215	0.359768	0.275861	0.396108	0.366742	0.349094	protein_coding	HGNC:14927	OTTHUMG00000130637.4_4
ENSG00000144182.17_4	LIPT1	-0.0566452	0.713252	0.802195	0	4.13426	3.13571	3.11056	3.09657	3.20025	3.66927	1.81407	1.37591	1.36488	1.35874	1.40423	1.61003	protein_coding	HGNC:29569	OTTHUMG00000130640.5_4
ENSG00000158411.11_4	MITD1	-0.033853	0.750047	0.830732	0	19.9267	18.2762	15.805	18.9689	15.7948	17.9409	4.62874	4.24533	3.67131	4.40626	3.66893	4.16746	protein_coding	HGNC:25207	OTTHUMG00000130638.6_4
ENSG00000185414.20_4	MRPL30	-0.082354	0.143418	0.251954	0	37.9921	36.4596	36.2842	35.1334	34.3355	35.1115	7.98153	7.65957	7.62274	7.38097	7.21335	7.37636	protein_coding	HGNC:14036	OTTHUMG00000130642.3_4
ENSG00000144214.9_2	LYG1	0.759897	0.00136114	0.00929579	1	0.979682	0.983387	0.807064	1.67487	1.50721	1.50014	0.896324	0.899714	0.738393	1.53236	1.37897	1.3725	protein_coding	HGNC:27014	OTTHUMG00000130639.2_2
ENSG00000115514.12_4	TXNDC9	-0.13029	0.110791	0.2086	0	37.5218	33.4723	32.1649	29.8167	31.6308	32.7802	13.3245	11.8865	11.4222	10.5883	11.2325	11.6407	protein_coding	HGNC:24110	OTTHUMG00000130641.7_4
ENSG00000158417.11_4	EIF5B	0.125066	0.0800595	0.164613	0	144.973	162.222	164.322	165.287	173.371	175.598	18.4327	20.6258	20.8928	21.0155	22.0433	22.3265	protein_coding	HGNC:30793	OTTHUMG00000153242.3_4
ENSG00000135945.10_4	REV1	-0.125041	0.0520195	0.120922	0	41.7737	40.5786	40.2523	39.1453	35.7602	37.5036	5.37697	5.22315	5.18114	5.03866	4.60293	4.82734	protein_coding	HGNC:14060	OTTHUMG00000130636.4_4
ENSG00000144218.18_3	AFF3	0.227143	0.103498	0.198042	0	4.74166	5.39935	4.28753	6.01786	4.99651	5.85867	0.372275	0.423911	0.33662	0.472471	0.392283	0.459972	protein_coding	HGNC:6473	OTTHUMG00000153011.8_3
ENSG00000170500.12_4	LONRF2	-0.454744	0.0393287	0.0981637	0	16.7134	14.6209	13.7033	14.3533	8.03159	10.4199	1.19955	1.04937	0.983512	1.03016	0.576443	0.747858	protein_coding	HGNC:24788	OTTHUMG00000130668.3_4
ENSG00000115526.11_4	CHST10	-0.279113	0.00203555	0.012191	0	26.8041	25.6608	25.9269	22.8056	21.4313	20.3533	5.95779	5.70368	5.76282	5.06903	4.76358	4.52396	protein_coding	HGNC:19650	OTTHUMG00000130669.11_4
ENSG00000115539.14_5	PDCL3	-0.254512	0.00878245	0.0334305	0	35.1314	38.9087	40.824	30.3035	34.2943	31.726	22.9317	25.3974	26.6475	19.7804	22.3853	20.7089	protein_coding	HGNC:28860	OTTHUMG00000153141.5_5
ENSG00000170485.17_4	NPAS2	0.18149	0.0146595	0.0481471	0	33.0349	30.6891	31.2401	37.6652	35.2647	34.7466	2.64195	2.45434	2.49841	3.01225	2.82027	2.77884	protein_coding	HGNC:7895	OTTHUMG00000130675.8_4
ENSG00000071082.11_4	RPL31	0.187755	0.0342458	0.0890704	0	324.197	346.301	362.355	357.897	417.147	401.41	61.4358	65.6246	68.6668	67.8221	79.05	76.0678	protein_coding	HGNC:10334	OTTHUMG00000130687.8_4
ENSG00000204634.12_4	TBC1D8	1.06388	2.81554e-05	0.000697979	1	4.50654	3.5068	3.51409	8.86126	7.6393	7.56153	0.747353	0.581558	0.582768	1.46953	1.26688	1.25399	protein_coding	HGNC:17791	OTTHUMG00000153040.2_4
ENSG00000158435.8_3	CNOT11	-0.0380565	0.580562	0.693156	0	60.4268	53.474	52.1565	54.2971	52.4221	54.9782	22.3637	19.7905	19.3029	20.0952	19.4012	20.3472	protein_coding	HGNC:25217	OTTHUMG00000130686.3_3
ENSG00000163162.8_2	RNF149	0.284276	0.0202417	0.0602448	0	30.6053	25.0114	23.1358	32.8548	30.9495	32.0301	6.32863	5.17193	4.78408	6.7938	6.39981	6.62326	protein_coding	HGNC:23137	OTTHUMG00000130685.2_2
ENSG00000175874.10_3	CREG2	1.40795	0.000263136	0.0030413	1	5.79972	3.0986	2.90879	10.6919	10.2821	10.2172	0.821606	0.438957	0.412069	1.51465	1.45659	1.4474	protein_coding	HGNC:14272	OTTHUMG00000130692.4_3
ENSG00000196460.14_4	RFX8	1.06474	0.019652	0.0590554	0	2.19449	1.20604	0.807064	4.10929	2.16791	2.43266	0.672125	0.369385	0.247186	1.25859	0.663984	0.745073	protein_coding	HGNC:37253	OTTHUMG00000130693.7_4
ENSG00000071054.16_6	MAP4K4	0.30912	0.000728247	0.0060901	0	571.684	527.43	536.983	700.721	665.796	660.509	47.7957	44.0958	44.8945	58.5838	55.6639	55.2219	protein_coding	HGNC:6866	OTTHUMG00000155394.5_6
ENSG00000135953.11_3	MFSD9	-0.129958	0.144246	0.253149	0	9.36576	9.96376	9.98741	9.15339	9.29104	8.35215	1.67936	1.78658	1.79082	1.64127	1.66596	1.49761	protein_coding	HGNC:28158	OTTHUMG00000130781.4_3
ENSG00000170417.16_3	TMEM182	-0.181828	0.232429	0.357681	0	2.54717	2.63474	2.20261	2.00595	2.08532	2.41239	0.418668	0.43306	0.362033	0.32971	0.342755	0.396514	protein_coding	HGNC:26391	OTTHUMG00000130779.7_3
ENSG00000235597.2_6	LINC01102	-0.946945	0.000499863	0.00472658	-1	1.37156	1.28026	1.4628	0.681635	0.640049	0.810888	0.191772	0.179007	0.204531	0.0953069	0.0894923	0.113379	lncRNA	HGNC:27165	OTTHUMG00000153050.33_6
ENSG00000233639.6_6	PANTR1	-1.42592	8.66233e-08	1.94164e-05	-1	34.524	34.6598	36.2506	11.6657	14.5147	13.0756	2.4323	2.44186	2.55394	0.821875	1.02259	0.921204	lncRNA	HGNC:49513	OTTHUMG00000153065.3_6
ENSG00000228528.2_3	AC068057.1	-0.0804601	0.553477	0.670716	0	3.15458	2.8945	2.92561	2.53179	3.20025	2.75702	1.93059	1.77142	1.79046	1.54944	1.95854	1.68728	lncRNA	NA	OTTHUMG00000153054.5_3
ENSG00000269707.2_8	AC018730.1	-0.012102	0.938815	0.959445	0	1.31277	1.24315	1.27785	1.30484	1.19751	1.29742	0.350822	0.332215	0.341489	0.348702	0.320019	0.346719	lncRNA	NA	OTTHUMG00000182993.2_8
ENSG00000198914.3_5	POU3F3	-0.598641	5.00415e-06	0.000229603	-1	63.601	64.4583	65.2881	40.4696	45.4848	41.7405	20.7575	21.0373	21.3081	13.2081	14.8449	13.6229	protein_coding	HGNC:9216	OTTHUMG00000153067.3_5
ENSG00000229743.4_7	LINC01159	-0.705512	0.000957611	0.00729032	-1	3.03702	3.32125	3.74948	1.94753	2.33308	1.92586	0.746746	0.816634	0.921929	0.478861	0.573662	0.473533	lncRNA	HGNC:49514	OTTHUMG00000153064.3_7
ENSG00000135972.9_4	MRPS9	-0.0526179	0.394238	0.527644	0	33.3484	34.4928	36.6037	32.4458	33.8607	34.4222	18.2331	18.8588	20.013	17.7397	18.5132	18.8202	protein_coding	HGNC:14501	OTTHUMG00000130807.3_4
ENSG00000135966.13_3	TGFBRAP1	0.0380913	0.509931	0.632808	0	44.4776	47.7778	47.6168	46.6433	49.7174	47.2748	7.79488	8.37325	8.34503	8.17443	8.71317	8.2851	protein_coding	HGNC:16836	OTTHUMG00000130809.3_3
ENSG00000272994.1_6	AC012360.3	0.145188	0.464161	0.593312	0	3.85995	4.11909	3.6486	5.06357	2.99378	4.78424	1.11915	1.19429	1.05787	1.46813	0.868014	1.38714	lncRNA	NA	OTTHUMG00000186032.1_6
ENSG00000135974.10_3	C2orf49	-0.0314536	0.657822	0.758957	0	21.6706	20.0759	19.2855	19.0663	20.6674	19.9681	4.71612	4.36909	4.19705	4.14936	4.4978	4.34562	protein_coding	HGNC:28772	OTTHUMG00000130808.3_3
ENSG00000115641.19_5	FHL2	-0.132757	0.0354599	0.0910846	0	159.159	155.876	164.137	142.656	152.621	141.784	24.0204	23.5249	24.7716	21.5298	23.0336	21.3981	protein_coding	HGNC:3703	OTTHUMG00000153120.6_5
ENSG00000071051.14_4	NCK2	0.00458778	0.934827	0.957215	0	83.273	80.5264	85.5824	83.5295	87.2532	79.4062	27.9909	27.0677	28.7672	28.0771	29.3288	26.6912	protein_coding	HGNC:7665	OTTHUMG00000153116.4_4
ENSG00000115652.14_2	UXS1	-0.129202	0.0802895	0.164859	0	144.209	155.598	154.149	127.29	144.3	143.507	20.5339	22.1555	21.9492	18.1248	20.5468	20.4338	protein_coding	HGNC:17729	OTTHUMG00000153150.3_2
ENSG00000214199.3_4	EEF1A1P12	0.128551	0.585475	0.697439	0	1.17562	1.24315	1.39555	1.07114	1.87885	1.2366	0.873417	0.923588	1.03681	0.795796	1.39588	0.918725	processed_pseudogene	HGNC:3195	OTTHUMG00000153185.1_4
ENSG00000135968.20_5	GCC2	-0.0378861	0.682625	0.777976	0	39.54	32.6744	32.0303	35.9319	32.2709	33.287	2.97696	2.46005	2.41156	2.70531	2.42967	2.50617	protein_coding	HGNC:23218	OTTHUMG00000153214.16_5
ENSG00000214184.3_5	GCC2-AS1	-0.141036	0.567264	0.682044	0	0.80334	1.31737	1.41236	1.01271	0.970397	1.2366	1.00543	1.64877	1.76766	1.26748	1.21451	1.54769	lncRNA	HGNC:28126	OTTHUMG00000153224.1_5
ENSG00000169756.16_5	LIMS1	-0.335409	0.00317782	0.0165841	0	261.085	233.861	210.644	195.318	177.954	185.896	33.5974	30.094	27.1064	25.1342	22.8998	23.9218	protein_coding	HGNC:6616	OTTHUMG00000130983.11_5
ENSG00000153201.16_3	RANBP2	0.101112	0.21206	0.33412	0	86.4668	99.4149	90.223	103.686	90.0405	102.415	7.03039	8.08317	7.3358	8.43048	7.32096	8.32711	protein_coding	HGNC:9848	OTTHUMG00000130981.11_3
ENSG00000163006.12_6	CCDC138	-0.027999	0.737369	0.820646	0	15.3026	13.3592	13.4342	14.5286	13.152	13.5824	2.64021	2.3049	2.31785	2.50665	2.26915	2.34341	protein_coding	HGNC:26531	OTTHUMG00000130980.6_6
ENSG00000172985.10_2	SH3RF3	0.411022	0.0702915	0.149494	0	1.27359	1.0205	0.874319	1.59697	1.19751	1.39878	0.21947	0.175857	0.150667	0.275198	0.206361	0.241045	protein_coding	HGNC:24699	OTTHUMG00000153439.6_2
ENSG00000186522.15_5	2021-09-10	-0.0128317	0.83724	0.895125	0	52.1191	46.8315	46.2885	48.3961	48.4373	47.0923	12.2604	11.0166	10.8888	11.3846	11.3943	11.0779	protein_coding	HGNC:14349	OTTHUMG00000154957.6_5
ENSG00000198142.5_4	SOWAHC	-0.0952204	0.226177	0.350388	0	26.471	23.1931	22.5305	22.6692	22.5256	22.3602	5.72099	5.01256	4.86936	4.89934	4.8683	4.83256	protein_coding	HGNC:26149	OTTHUMG00000153219.2_4
ENSG00000144061.12_5	NPHP1	0.24093	0.114876	0.214254	0	8.44486	7.06926	7.59985	9.97135	7.2883	10.0347	0.717917	0.600974	0.646081	0.847687	0.619596	0.853077	protein_coding	HGNC:7905	OTTHUMG00000131195.3_5
ENSG00000175701.10_5	MTLN	0.0491021	0.582427	0.694595	0	12.2068	13.0809	14.5608	13.769	14.494	12.9945	5.95165	6.37782	7.09935	6.71332	7.06681	6.33568	protein_coding	HGNC:27339	OTTHUMG00000131194.5_5
ENSG00000169679.15_5	BUB1	-0.354662	0.00171	0.010744	0	97.0473	80.6749	81.5134	70.559	65.8631	66.2698	15.3946	12.7974	12.9304	11.1927	10.4478	10.5123	protein_coding	HGNC:1148	OTTHUMG00000153638.6_5
ENSG00000172965.16_7	MIR4435-2HG	0.0873657	0.179863	0.296448	0	65.2077	57.389	62.0935	64.9306	67.1019	64.1818	3.77731	3.32439	3.59691	3.76126	3.88704	3.71788	lncRNA	HGNC:35163	OTTHUMG00000150313.57_7
ENSG00000153094.23_5	BCL2L11	0.533517	0.00320275	0.0166633	0	25.844	19.3338	20.3784	36.7109	28.8848	29.2122	3.88282	2.90471	3.06165	5.51546	4.33966	4.38886	protein_coding	HGNC:994	OTTHUMG00000131256.10_5
ENSG00000227992.1_5	AC108463.1	-0.0175648	0.906634	0.940832	0	2.4688	2.70895	3.36277	2.70706	2.95249	2.79756	7.1147	7.80678	9.69097	7.80134	8.5086	8.06214	processed_pseudogene	NA	OTTHUMG00000153689.1_5
ENSG00000153107.13_4	ANAPC1	0.190621	0.0135069	0.0455662	0	24.2765	26.2917	27.2216	29.6998	29.6281	29.4758	1.73602	1.88013	1.94662	2.12384	2.11871	2.10782	protein_coding	HGNC:19988	OTTHUMG00000192458.2_4
ENSG00000153208.16_2	MERTK	-0.432402	0.00924251	0.0345942	0	4.25182	3.748	3.79993	3.3108	2.66343	2.75702	0.904643	0.797448	0.808495	0.704425	0.566687	0.5866	protein_coding	HGNC:7027	OTTHUMG00000131278.4_2
ENSG00000153214.11_6	TMEM87B	0.174809	0.180625	0.29723	0	17.1053	13.9344	12.4759	16.9435	14.8244	17.2922	3.21467	2.61876	2.34465	3.18427	2.78601	3.2498	protein_coding	HGNC:25913	OTTHUMG00000153266.6_6
ENSG00000144152.13_4	FBLN7	-0.412109	7.11467e-05	0.00125683	0	24.1002	24.9558	25.3553	18.8716	18.8298	18.2247	3.66264	3.79267	3.85338	2.86802	2.86168	2.76971	protein_coding	HGNC:26740	OTTHUMG00000153267.5_4
ENSG00000278962.1_5	AC092645.1	-0.379117	0.0507272	0.118603	0	3.95792	4.1562	3.2787	2.35651	2.93184	3.46655	1.74204	1.82931	1.44309	1.0372	1.29042	1.52577	TEC	NA	OTTHUMG00000176143.1_5
ENSG00000144161.13_3	ZC3H8	0.00257863	0.973982	0.983186	0	10.2083	11.2997	10.744	10.3024	11.2112	10.8051	1.5533	1.71937	1.63482	1.56762	1.7059	1.64411	protein_coding	HGNC:30941	OTTHUMG00000153270.4_3
ENSG00000188177.14_3	ZC3H6	-0.129587	0.206062	0.326881	0	8.24893	8.38662	8.07064	8.1991	6.75149	7.62235	0.699062	0.710731	0.683952	0.694839	0.57216	0.645962	protein_coding	HGNC:24762	OTTHUMG00000153286.4_3
ENSG00000114999.8_3	TTL	0.119678	0.035813	0.0917158	0	120.893	114.444	115.023	126.297	128.526	125.83	7.68549	7.27553	7.31236	8.02907	8.17076	7.99934	protein_coding	HGNC:21586	OTTHUMG00000131316.4_3
ENSG00000125630.15_2	POLR1B	0.0364175	0.587138	0.698932	0	30.2722	33.0826	34.4011	33.3417	32.4154	34.5236	4.78309	5.22715	5.43547	5.26808	5.12173	5.45482	protein_coding	HGNC:20454	OTTHUMG00000131314.4_2
ENSG00000125611.15_3	CHCHD5	-0.0078331	0.916457	0.947001	0	20.1227	21.3933	23.388	20.8775	22.4224	21.2858	5.3532	5.69122	6.22188	5.55401	5.96498	5.66263	protein_coding	HGNC:17840	OTTHUMG00000131312.2_3
ENSG00000231747.1_5	AC079922.1	-0.215841	0.384779	0.518232	0	1.15603	0.909169	1.14334	0.759536	1.23881	0.770344	3.22013	2.53251	3.18479	2.1157	3.45071	2.1458	processed_pseudogene	NA	OTTHUMG00000153301.1_5
ENSG00000237753.2_7	AC079922.2	0.483574	0.0178304	0.0548676	0	0.960089	0.853506	0.907947	1.12957	1.30075	1.37851	0.297794	0.264735	0.281621	0.350362	0.403457	0.427577	lncRNA	NA	OTTHUMG00000153299.3_7
ENSG00000144136.11_5	SLC20A1	0.386931	0.00106831	0.0078083	0	121.579	111.438	114.469	169.766	140.15	144.419	22.1334	20.2873	20.839	30.9059	25.5143	26.2915	protein_coding	HGNC:10946	OTTHUMG00000131317.5_5
ENSG00000169607.13_3	CKAP2L	-0.494285	0.000203371	0.00257081	0	49.474	44.9204	42.4885	35.1139	31.8373	30.1853	9.05453	8.22116	7.77609	6.42642	5.82674	5.5244	protein_coding	HGNC:26877	OTTHUMG00000131313.3_3
ENSG00000125637.15_5	PSD4	1.90867	2.13532e-08	1.07583e-05	1	4.42816	5.51068	5.31317	19.5337	19.3667	18.4477	0.329428	0.40996	0.395266	1.45319	1.44076	1.37239	protein_coding	HGNC:19096	OTTHUMG00000153339.3_5
ENSG00000189223.15_5	PAX8-AS1	1.89811	3.441e-06	0.000188951	1	0.587809	0.630852	0.521229	2.29808	1.85821	2.3313	0.0265917	0.0285389	0.0235797	0.103962	0.0840628	0.105465	lncRNA	HGNC:49271	OTTHUMG00000153340.15_5
ENSG00000125618.17_5	PAX8	1.20364	0.000148064	0.00207427	1	0.509435	0.649407	0.739808	1.51907	1.44527	1.43933	0.0691134	0.0881029	0.100367	0.206088	0.196076	0.195269	protein_coding	HGNC:8622	OTTHUMG00000128529.12_5
ENSG00000234997.2_6	AC016745.1	1.46952	6.39937e-05	0.0011767	1	0.470248	0.426753	0.538043	1.48012	1.11492	1.39878	0.464213	0.421276	0.531138	1.46113	1.10062	1.38083	lncRNA	NA	OTTHUMG00000153341.2_6
ENSG00000136682.14_4	CBWD2	-0.0159511	0.818465	0.881171	0	13.3041	13.7118	13.6696	12.7758	13.4617	14.0081	1.58457	1.63313	1.62811	1.52165	1.60334	1.66842	protein_coding	HGNC:17907	OTTHUMG00000131360.3_4
ENSG00000146556.14_2	WASH2P	0.486502	0.0591519	0.132544	0	1.35196	1.2246	1.39555	2.51231	1.48657	1.56096	0.457053	0.413994	0.471788	0.849328	0.502558	0.527708	transcribed_unprocessed_pseudogene	HGNC:33145	OTTHUMG00000047822.4_2
ENSG00000279267.1_5	AL078621.3	0.446538	0.00740168	0.0297599	0	2.03774	2.15232	1.89996	2.60969	2.95249	2.73675	0.997914	1.05403	0.930442	1.27801	1.44588	1.34023	TEC	NA	OTTHUMG00000176151.1_5
ENSG00000240356.6_4	RPL23AP7	0.436452	0.00241814	0.0137647	0	9.50292	9.70399	11.3661	12.3279	14.7005	14.3933	4.46566	4.56015	5.34124	5.79317	6.90812	6.76375	transcribed_processed_pseudogene	HGNC:17336	OTTHUMG00000047825.2_4
ENSG00000144134.18_2	RABL2A	0.417072	0.00396395	0.0193154	0	9.91439	9.57411	9.34849	14.7817	11.2112	12.4877	1.6502	1.59356	1.55601	2.46034	1.86604	2.07851	protein_coding	HGNC:9799	OTTHUMG00000047828.6_2
ENSG00000115084.14_3	SLC35F5	-0.100211	0.200385	0.320302	0	61.1126	58.4095	52.8795	51.2395	52.0711	57.492	4.56132	4.35957	3.94682	3.82441	3.88648	4.29109	protein_coding	HGNC:23617	OTTHUMG00000131361.6_3
ENSG00000115091.11_3	ACTR3	-0.320976	0.000497421	0.00471326	0	523.425	526.632	520.758	394.55	427.491	435.447	43.4413	43.7075	43.22	32.7454	35.4794	36.1397	protein_coding	HGNC:170	OTTHUMG00000153497.8_3
ENSG00000088205.13_3	DDX18	0.00725441	0.881722	0.924665	0	99.379	103.126	98.1759	98.4671	101.272	102.456	12.7278	13.2077	12.5738	12.611	12.9703	13.1219	protein_coding	HGNC:2741	OTTHUMG00000058521.10_3
ENSG00000236255.2_6	AC009404.1	0.661676	0.00438346	0.0207531	1	0.587809	0.593743	0.57167	0.934814	0.929104	0.912249	0.11118	0.112303	0.108128	0.176814	0.175734	0.172546	lncRNA	NA	OTTHUMG00000058513.3_6
ENSG00000125633.11_4	CCDC93	0.138481	0.107596	0.204045	0	39.2265	40.5415	40.1178	48.9803	39.8895	43.0784	4.86379	5.02685	4.97431	6.0732	4.946	5.3414	protein_coding	HGNC:25611	OTTHUMG00000058517.6_4
ENSG00000125629.15_3	INSIG2	-0.368232	0.00598189	0.0258177	0	19.1626	17.5711	14.9979	12.4837	13.2759	14.2919	4.85129	4.44838	3.79695	3.16042	3.36098	3.6182	protein_coding	HGNC:20452	OTTHUMG00000058518.3_3
ENSG00000163064.6_2	EN1	0.0133558	0.938213	0.959029	0	1.72424	1.4658	1.51324	1.69435	1.30075	1.74341	0.59745	0.507902	0.52434	0.587093	0.450709	0.604092	protein_coding	HGNC:3342	OTTHUMG00000131401.3_2
ENSG00000115107.20_4	STEAP3	1.04296	4.92152e-05	0.00100736	1	20.2598	14.2684	13.6696	32.1927	33.8813	33.1045	4.441	3.12766	2.99641	7.0567	7.42686	7.25658	protein_coding	HGNC:24592	OTTHUMG00000131402.3_4
ENSG00000186132.15_3	C2orf76	-0.0822945	0.510455	0.633229	0	8.91511	7.8671	6.65828	6.91373	7.84577	7.35881	5.73688	5.06248	4.28461	4.44899	5.04876	4.7354	protein_coding	HGNC:27017	OTTHUMG00000153298.4_3
ENSG00000155368.16_3	DBI	0.0689859	0.451066	0.581997	0	177.538	185.174	204.019	176.446	218.484	199.62	70.7605	73.8038	81.3149	70.3253	87.0801	79.5617	protein_coding	HGNC:2690	OTTHUMG00000131403.4_3
ENSG00000171227.7_5	TMEM37	2.12375	5.03077e-05	0.0010178	1	0.254717	0.148436	0.184952	0.915339	0.681343	0.973066	0.111182	0.0647908	0.0807299	0.399537	0.2974	0.424734	protein_coding	HGNC:18216	OTTHUMG00000153304.6_5
ENSG00000144120.13_5	TMEM177	0.148025	0.133677	0.238892	0	12.2656	13.2479	14.2245	14.7817	15.898	13.3797	4.73942	5.11897	5.49633	5.71165	6.14297	5.16988	protein_coding	HGNC:28143	OTTHUMG00000153312.3_5
ENSG00000088179.9_6	PTPN4	-0.0378509	0.751464	0.831965	0	16.635	14.1942	11.9714	14.217	13.152	14.2716	1.25301	1.06916	0.901736	1.07088	0.990658	1.07499	protein_coding	HGNC:9656	OTTHUMG00000131436.9_6
ENSG00000115109.14_3	EPB41L5	-0.10842	0.0538479	0.123992	0	67.0887	69.5607	66.6668	63.3921	61.3002	63.898	7.28512	7.55356	7.23931	6.88371	6.65655	6.93865	protein_coding	HGNC:19819	OTTHUMG00000131433.7_3
ENSG00000226479.4_4	TMEM185B	0.0841303	0.110105	0.20745	0	65.9914	68.6701	68.4659	71.3964	73.0482	70.8919	11.1434	11.5958	11.5613	12.0561	12.3351	11.9709	protein_coding	HGNC:18896	OTTHUMG00000154402.5_4
ENSG00000144118.14_4	RALB	0.315946	0.00572056	0.0249815	0	65.6387	53.6224	52.9467	72.0196	73.585	68.7025	22.9105	18.7164	18.4805	25.1377	25.6841	23.9799	protein_coding	HGNC:9840	OTTHUMG00000131435.22_4
ENSG00000074047.21_3	GLI2	-0.497288	0.00208431	0.012407	0	40.4413	54.7543	54.6618	37.3147	34.5214	34.3614	5.50896	7.45869	7.44609	5.08305	4.70254	4.68075	protein_coding	HGNC:4318	OTTHUMG00000153741.11_3
ENSG00000074054.18_6	CLASP1	0.0392964	0.629591	0.735383	0	88.3282	88.4121	87.0116	100.181	79.9236	90.9006	7.99205	7.99965	7.87292	9.0645	7.23159	8.22481	protein_coding	HGNC:17088	OTTHUMG00000153331.9_6
ENSG00000236859.7_7	NIFK-AS1	-0.229924	0.0867135	0.174025	0	5.29029	4.41597	5.63263	4.18719	4.48034	4.41934	1.03488	0.863843	1.10185	0.81909	0.876437	0.864503	lncRNA	HGNC:27385	OTTHUMG00000153332.16_7
ENSG00000155438.12_4	NIFK	0.0479921	0.435364	0.567247	0	50.2773	54.7172	55.0821	54.2387	53.6609	57.6136	20.6478	22.4711	22.621	22.2746	22.0373	23.6606	protein_coding	HGNC:17838	OTTHUMG00000131442.5_4
ENSG00000211460.12_4	TSN	-0.126782	0.0494528	0.11634	0	111.292	104.61	99.9414	94.4162	95.8422	98.9892	25.3224	23.8021	22.7398	21.4826	21.8071	22.5231	protein_coding	HGNC:12379	OTTHUMG00000153334.5_4
ENSG00000136717.15_5	BIN1	-0.167623	0.0334465	0.0874072	0	39.8143	34.9195	34.956	32.7964	32.7251	32.1112	5.80214	5.08883	5.09413	4.77942	4.76903	4.67956	protein_coding	HGNC:1052	OTTHUMG00000131465.3_5
ENSG00000163161.13_3	ERCC3	-0.0108531	0.850926	0.904385	0	74.3775	71.0265	73.7455	76.9079	69.2079	71.3784	8.83133	8.43345	8.75629	9.13179	8.21751	8.47523	protein_coding	HGNC:3435	OTTHUMG00000131530.8_3
ENSG00000169967.16_2	MAP3K2	-0.160797	0.0591477	0.132544	0	41.4406	39.1685	34.9896	36.0877	33.0761	34.1992	3.60102	3.40359	3.04046	3.13588	2.87418	2.97178	protein_coding	HGNC:6854	OTTHUMG00000153397.2_2
ENSG00000236682.2_7	MAP3K2-DT	-0.19832	0.124675	0.226885	0	2.95864	3.17282	3.161	2.90182	2.60149	2.59484	0.909232	0.975051	0.97142	0.891769	0.799475	0.797431	lncRNA	HGNC:54088	OTTHUMG00000153398.3_7
ENSG00000115718.17_4	PROC	-2.31305	0.000418845	0.00418937	-1	0.607403	1.16893	1.32829	0.253179	0.268408	0.101361	0.243448	0.46851	0.532382	0.101474	0.107578	0.0406257	protein_coding	HGNC:9451	OTTHUMG00000131528.5_4
ENSG00000163166.15_4	IWS1	-0.10412	0.0776548	0.161241	0	77.6692	82.419	84.5736	74.6098	77.4253	75.6153	18.7335	19.8792	20.3988	17.9956	18.6747	18.2381	protein_coding	HGNC:25467	OTTHUMG00000131527.11_4
ENSG00000072163.19_4	LIMS2	-0.212268	0.242135	0.36904	0	20.1031	32.6188	32.5179	22.7277	25.9323	24.9956	2.36869	3.84338	3.8315	2.67794	3.05553	2.94517	protein_coding	HGNC:16084	OTTHUMG00000131529.6_4
ENSG00000136709.12_5	WDR33	-0.0105736	0.834805	0.893417	0	69.3223	70.7668	67.7934	71.1237	67.7007	67.5267	4.75625	4.85535	4.65135	4.87985	4.64499	4.63305	protein_coding	HGNC:25651	OTTHUMG00000131534.8_5
ENSG00000173349.5_2	SFT2D3	-0.172148	0.0481859	0.114165	0	17.4775	16.7361	15.536	13.8275	14.9482	15.3663	4.67939	4.48089	4.15957	3.70213	4.00221	4.11414	protein_coding	HGNC:28767	OTTHUMG00000131532.1_2
ENSG00000144231.11_4	POLR2D	-0.0898047	0.0972233	0.18929	0	59.7606	59.7269	59.4873	57.7053	54.6313	55.8296	11.444	11.4375	11.3917	11.0504	10.4618	10.6912	protein_coding	HGNC:9191	OTTHUMG00000131531.6_4
ENSG00000144233.9_2	AMMECR1L	0.0481285	0.344726	0.478359	0	58.2519	60.0608	58.4953	62.4962	59.7517	60.5531	12.2352	12.6152	12.2863	13.1267	12.5502	12.7186	protein_coding	HGNC:28658	OTTHUMG00000131535.1_2
ENSG00000272667.1_6	AC012306.2	-0.287439	0.119289	0.220112	0	1.58709	2.00388	1.71501	1.46065	1.63109	1.25688	2.51918	3.18077	2.72224	2.31849	2.58904	1.99504	lncRNA	NA	OTTHUMG00000186044.1_6
ENSG00000286873.1_1	AC012306.3	-0.749801	0.00665646	0.0277735	-1	1.13643	1.48436	1.00883	0.779011	0.743283	0.628438	1.07515	1.40431	0.954427	0.737002	0.703201	0.594549	lncRNA	NA	OTTHUMG00000195731.1_1
ENSG00000136715.18_5	SAP130	-0.25103	0.000805267	0.00648053	0	55.9986	59.0775	58.6634	49.1946	48.2515	48.5519	12.8055	13.5096	13.4149	11.2496	11.0339	11.1027	protein_coding	HGNC:29813	OTTHUMG00000131571.7_5
ENSG00000136731.12_2	UGGT1	0.0389564	0.577596	0.69076	0	81.7839	88.3935	85.4983	91.2028	79.6345	91.8331	7.20626	7.78866	7.53356	8.03619	7.01688	8.09173	protein_coding	HGNC:15663	OTTHUMG00000131570.4_2
ENSG00000136720.7_3	HS6ST1	-0.284115	0.022318	0.064816	0	59.8782	72.8263	73.9808	50.4605	62.4564	56.8838	12.0382	14.6414	14.8735	10.1448	12.5566	11.4362	protein_coding	HGNC:5201	OTTHUMG00000153542.2_3
ENSG00000152076.18_5	CCDC74B	-0.130818	0.36998	0.503914	0	8.11177	6.47551	6.65828	7.59536	5.71915	6.06139	1.80784	1.44317	1.4839	1.69275	1.2746	1.35088	protein_coding	HGNC:25267	OTTHUMG00000131629.4_5
ENSG00000136699.19_5	SMPD4	0.0762573	0.228127	0.352609	0	93.932	96.3905	98.6972	109.101	98.4024	97.2052	12.7365	13.0699	13.3827	14.7933	13.3427	13.1804	protein_coding	HGNC:32949	OTTHUMG00000131624.18_5
ENSG00000152082.14_7	MZT2B	-0.0727864	0.360182	0.493959	0	62.8172	68.2063	76.1162	64.249	68.795	63.9588	34.61	37.5792	41.9373	35.3989	37.9036	35.239	protein_coding	HGNC:25886	OTTHUMG00000131625.4_7
ENSG00000136710.10_4	CCDC115	-0.201062	0.00518963	0.0232401	0	34.0734	32.4889	34.4852	28.8234	29.6694	29.415	7.67418	7.31732	7.76693	6.49176	6.68229	6.62499	protein_coding	HGNC:28178	OTTHUMG00000131631.7_4
ENSG00000136718.9_5	IMP4	0.134941	0.028682	0.0782305	0	59.5255	63.3635	63.1527	67.2482	70.0544	66.9996	15.4171	16.4112	16.3566	17.4173	18.1441	17.3529	protein_coding	HGNC:30856	OTTHUMG00000131627.3_5
ENSG00000072135.13_4	PTPN18	0.333434	0.0102573	0.0372307	0	13.2453	10.3163	11.1644	15.0349	15.0102	13.6837	2.31077	1.79977	1.94773	2.62298	2.61867	2.38725	protein_coding	HGNC:9649	OTTHUMG00000131630.6_4
ENSG00000136002.18_4	ARHGEF4	1.71585	2.08858e-06	0.000137958	1	1.92018	1.74412	1.36192	5.80364	5.65721	5.00723	0.180961	0.164369	0.12835	0.546945	0.533146	0.471891	protein_coding	HGNC:684	OTTHUMG00000191895.1_4
ENSG00000152102.18_3	FAM168B	-0.0760525	0.150124	0.260785	0	235.418	243.769	237.832	227.121	225.442	227.637	43.3151	44.8517	43.7593	41.7886	41.4796	41.8835	protein_coding	HGNC:27016	OTTHUMG00000153473.3_3
ENSG00000115762.16_3	PLEKHB2	0.0251292	0.659203	0.759973	0	177.793	185.044	182.279	174.908	192.324	187.477	26.4258	27.5035	27.0926	25.997	28.5857	27.8652	protein_coding	HGNC:19236	OTTHUMG00000131656.9_3
ENSG00000173272.16_4	MZT2A	0.120411	0.147841	0.258	0	27.2352	26.4772	28.1295	28.1418	32.8696	27.9756	6.69498	6.50866	6.91483	6.91784	8.08005	6.877	protein_coding	HGNC:33187	OTTHUMG00000153606.4_4
ENSG00000152117.17_5	AC073869.1	0.209556	0.15731	0.26974	0	14.9695	15.6785	13.7537	20.8386	14.0191	16.4408	3.82462	4.00576	3.51398	5.32411	3.58179	4.2005	transcribed_processed_pseudogene	NA	OTTHUMG00000153607.7_5
ENSG00000163040.14_4	CCDC74A	-0.268142	0.0262059	0.0731849	0	7.21046	6.67961	6.10342	5.80364	5.47139	5.31132	2.34334	2.17082	1.98356	1.88613	1.77816	1.72613	protein_coding	HGNC:25197	OTTHUMG00000131667.5_4
ENSG00000287151.1_1	C2orf27A	0.150936	0.259004	0.38733	0	5.01597	4.69428	4.23708	5.45308	4.43905	5.57486	0.707472	0.662099	0.597614	0.769123	0.6261	0.786298	lncRNA	NA	OTTHUMG00000193774.2_1
ENSG00000163046.15_3	ANKRD30BL	0.964829	0.000557286	0.00511051	1	4.27142	2.98727	3.17781	5.64783	8.13482	6.56819	0.863435	0.603855	0.642372	1.14167	1.64439	1.32771	protein_coding	HGNC:35167	OTTHUMG00000153491.3_3
ENSG00000183840.7_4	GPR39	-0.348691	0.0138077	0.0462728	0	9.67926	8.36807	8.57505	6.05681	7.14378	7.70344	3.04475	2.6323	2.69741	1.90526	2.24718	2.42323	protein_coding	HGNC:4496	OTTHUMG00000131679.3_4
ENSG00000150551.10_2	LYPD1	-0.507319	2.98308e-05	0.000727052	0	380.783	389.885	408.626	261.397	292.833	275.459	157.87	161.644	169.414	108.374	121.407	114.203	protein_coding	HGNC:28431	OTTHUMG00000153609.2_2
ENSG00000176771.17_7	NCKAP5	-1.16383	0.00023387	0.00282234	-1	3.74239	4.95405	5.07778	1.69435	2.58084	1.88531	0.39134	0.518043	0.530982	0.177178	0.269878	0.197147	protein_coding	HGNC:29847	OTTHUMG00000153573.11_7
ENSG00000152127.9_3	MGAT5	0.381303	0.000142028	0.00200615	0	75.4747	69.134	68.6677	96.2663	89.1527	92.3399	8.61092	7.88751	7.8343	10.983	10.1714	10.5351	protein_coding	HGNC:7049	OTTHUMG00000131681.5_3
ENSG00000224043.8_6	CCNT2-AS1	-0.156955	0.223747	0.347528	0	4.0167	3.80367	4.15302	3.155	3.92288	3.66927	0.776174	0.735008	0.802515	0.609661	0.758045	0.709037	lncRNA	HGNC:40130	OTTHUMG00000154855.3_6
ENSG00000082258.13_4	CCNT2	-0.136816	0.323307	0.455387	0	40.2845	32.5631	29.6932	35.5424	27.0266	30.611	4.43613	3.58585	3.26982	3.91393	2.97617	3.37089	protein_coding	HGNC:1600	OTTHUMG00000131712.4_4
ENSG00000115839.17_3	RAB3GAP1	0.045598	0.365318	0.499149	0	73.2411	71.5275	73.9808	73.0518	76.0213	76.71	11.0486	10.7901	11.1602	11.02	11.468	11.5719	protein_coding	HGNC:17063	OTTHUMG00000154889.2_3
ENSG00000121988.18_4	ZRANB3	0.0270726	0.703897	0.79514	0	11.1684	10.5018	10.8281	11.1399	10.9015	11.0686	1.2277	1.15443	1.19029	1.22456	1.19836	1.21673	protein_coding	HGNC:25249	OTTHUMG00000150475.5_4
ENSG00000048991.16_3	R3HDM1	-0.148761	0.0116102	0.0407983	0	64.3847	64.6624	65.5235	59.4581	57.6251	58.4245	8.15203	8.18718	8.29621	7.52824	7.29616	7.39738	protein_coding	HGNC:9757	OTTHUMG00000131740.11_3
ENSG00000144224.17_3	UBXN4	-0.227681	0.0126968	0.0434514	0	210.73	188.959	174.763	166.592	159.703	164.245	42.1628	37.8069	34.9666	33.3317	31.9533	32.8622	protein_coding	HGNC:14860	OTTHUMG00000153577.3_3
ENSG00000076003.5_3	MCM6	-0.306755	0.000603971	0.00537986	0	152.968	144.688	154.637	128.732	120.722	116.2	36.9934	34.991	37.397	31.1322	29.1951	28.1016	protein_coding	HGNC:6949	OTTHUMG00000131739.3_3
ENSG00000115866.11_3	DARS	-0.0986151	0.108749	0.205661	0	84.3702	77.1124	80.4542	72.6818	75.2987	77.9669	17.7547	16.2274	16.9306	15.295	15.8457	16.4072	protein_coding	HGNC:2678	OTTHUMG00000131741.8_3
ENSG00000231890.8_6	DARS-AS1	0.0999748	0.624547	0.73168	0	0.920901	1.0205	0.807064	0.915339	1.17686	0.851433	0.140253	0.155421	0.122916	0.139406	0.179236	0.129673	lncRNA	HGNC:40170	OTTHUMG00000153578.6_6
ENSG00000121966.6_2	CXCR4	0.0124748	0.918809	0.948284	0	25.6089	23.0076	24.0606	29.5245	22.3191	21.4277	11.5148	10.3451	10.8186	13.2754	10.0356	9.63477	protein_coding	HGNC:2561	OTTHUMG00000153583.1_2
ENSG00000150540.14_3	HNMT	0.473453	0.00107622	0.00783552	0	5.30988	4.9726	5.78396	7.32271	7.86641	7.13582	1.11646	1.04554	1.21614	1.53968	1.654	1.50038	protein_coding	HGNC:5028	OTTHUMG00000131751.5_3
ENSG00000144228.8_3	SPOPL	-0.00399703	0.960012	0.974553	0	22.4347	20.5027	18.7979	20.0985	20.0686	21.3669	3.46857	3.16987	2.90629	3.10737	3.10276	3.30348	protein_coding	HGNC:27934	OTTHUMG00000153635.1_3
ENSG00000144227.5_3	NXPH2	-0.107841	0.167725	0.281871	0	14.6365	15.7713	14.1068	13.3016	13.7301	14.2716	5.4029	5.82182	5.20738	4.91016	5.06832	5.26823	protein_coding	HGNC:8076	OTTHUMG00000153636.2_3
ENSG00000168702.17_3	LRP1B	-0.228429	0.069059	0.147815	0	6.799	8.55361	7.7848	7.05005	6.17338	6.52765	0.399002	0.501973	0.456855	0.413736	0.362287	0.383078	protein_coding	HGNC:6693	OTTHUMG00000131799.5_3
ENSG00000121964.14_4	GTDC1	0.157115	0.033528	0.0875865	0	27.2156	25.03	26.3977	27.7912	30.1649	29.7393	1.92173	1.76741	1.86398	1.96238	2.12999	2.09994	protein_coding	HGNC:20887	OTTHUMG00000131835.6_4
ENSG00000169554.21_6	ZEB2	0.00724703	0.923134	0.950811	0	64.13	75.3683	75.326	68.8841	74.5348	72.5339	2.57954	3.03159	3.02988	2.77077	2.99806	2.91758	protein_coding	HGNC:14881	OTTHUMG00000187624.10_6
ENSG00000287115.1_1	AC009951.3	0.0160133	0.944408	0.963305	0	0.881714	0.964833	1.19378	0.817962	1.30075	0.973066	1.62678	1.78013	2.20255	1.50916	2.3999	1.79532	lncRNA	NA	OTTHUMG00000193812.1_1
ENSG00000121989.15_3	ACVR2A	0.139116	0.156383	0.268925	0	11.1488	10.7987	9.98741	10.5751	12.0371	12.5485	1.72903	1.67474	1.54892	1.64006	1.86679	1.94611	protein_coding	HGNC:173	OTTHUMG00000150603.3_3
ENSG00000115947.13_3	ORC4	-0.282581	0.00579074	0.0252236	0	34.5632	31.9508	30.0127	25.3763	25.3129	28.6446	3.87697	3.58394	3.36654	2.84647	2.83936	3.21308	protein_coding	HGNC:8490	OTTHUMG00000131849.9_3
ENSG00000204406.13_5	MBD5	-0.026295	0.706907	0.797947	0	16.8701	17.033	16.7466	15.8529	16.1045	17.7787	0.695503	0.702219	0.69041	0.653565	0.663937	0.732962	protein_coding	HGNC:20444	OTTHUMG00000150440.15_5
ENSG00000135999.12_3	EPC2	-0.121102	0.0667389	0.144423	0	34.9551	32.2291	32.1312	30.7125	29.8965	30.6921	6.01016	5.54146	5.52463	5.2807	5.14039	5.27719	protein_coding	HGNC:24543	OTTHUMG00000153739.6_3
ENSG00000168280.12	KIF5C	-0.145209	0.216094	0.338603	0	54.6859	46.2007	42.4381	48.3571	38.9811	42.1865	5.93058	5.01037	4.60233	5.24424	4.22742	4.57504	protein_coding	NA	OTTHUMG00000153779.5
ENSG00000187123.15_5	LYPD6	-0.220769	0.0836763	0.169598	0	10.9333	9.98231	11.4334	8.06277	10.6331	9.08195	2.19852	2.0073	2.2991	1.62131	2.13816	1.82625	protein_coding	HGNC:28751	OTTHUMG00000131852.8_5
ENSG00000168288.13_3	MMADHC	-0.0427229	0.437398	0.569358	0	79.5502	75.2199	75.6959	71.3964	76.8885	75.4531	37.0001	34.986	35.2074	33.2076	35.7621	35.0945	protein_coding	HGNC:25221	OTTHUMG00000155558.4_3
ENSG00000115963.13_2	RND3	-0.058303	0.554208	0.671239	0	52.7461	64.8665	64.0607	52.408	60.7634	61.364	14.6762	18.0485	17.8243	14.5821	16.9069	17.074	protein_coding	HGNC:671	OTTHUMG00000131859.4_2
ENSG00000184898.7_4	RBM43	-0.103878	0.481488	0.607741	0	9.18942	6.93938	7.33083	7.96539	6.13208	7.70344	1.95478	1.47615	1.55942	1.6944	1.30442	1.63868	protein_coding	HGNC:24790	OTTHUMG00000131866.3_4
ENSG00000123609.10_3	NMI	0.0152264	0.881802	0.924667	0	13.0886	10.7616	11.2653	11.1593	12.9455	11.3727	3.76108	3.09241	3.23715	3.20671	3.71997	3.26802	protein_coding	HGNC:7854	OTTHUMG00000131867.4_3
ENSG00000123610.5_3	TNFAIP6	5.2821	4.90014e-06	0.000229603	1	0.117562	0.0556634	0	1.53855	2.68408	2.47321	0.0745478	0.035297	0	0.975617	1.70201	1.5683	protein_coding	HGNC:11898	OTTHUMG00000131884.4_3
ENSG00000080345.17_6	RIF1	-0.110938	0.239036	0.365545	0	51.0219	49.2807	44.0522	48.7272	39.6624	45.2273	2.80865	2.7128	2.42498	2.68233	2.18333	2.48967	protein_coding	HGNC:23207	OTTHUMG00000131886.6_6
ENSG00000162980.17_4	ARL5A	-0.225872	0.225511	0.349594	0	24.8252	18.1463	14.4431	17.5278	15.4231	16.0556	3.69367	2.69994	2.14895	2.60791	2.29477	2.38887	protein_coding	HGNC:696	OTTHUMG00000131887.8_4
ENSG00000115145.10_3	STAM2	-0.119719	0.156902	0.269375	0	31.2911	27.7018	25.8933	26.6227	25.3749	26.0903	4.61792	4.08823	3.82132	3.92897	3.74481	3.8504	protein_coding	HGNC:11358	OTTHUMG00000131885.4_3
ENSG00000157827.20_4	FMNL2	-0.184847	0.0200685	0.059925	0	195.564	204.229	189.795	181.101	159.248	178.314	29.7481	31.0662	28.8705	27.548	24.224	27.1242	protein_coding	HGNC:18267	OTTHUMG00000154035.7_4
ENSG00000196504.16_6	PRPF40A	-0.145105	0.0170738	0.0533722	0	132.218	128.694	123.733	116.209	114.094	117.518	13.8651	13.4956	12.9754	12.1864	11.9645	12.3236	protein_coding	HGNC:16463	OTTHUMG00000154031.13_6
ENSG00000177917.10_2	ARL6IP6	-0.276119	0.00763899	0.0303187	0	42.9885	35.9215	36.0152	32.0953	32.1676	30.611	12.8362	10.726	10.754	9.58354	9.60515	9.14035	protein_coding	HGNC:24048	OTTHUMG00000131901.4_2
ENSG00000144278.15_4	GALNT13	0.174094	0.377151	0.51113	0	1.31277	1.59569	1.37873	1.26589	1.69303	1.88531	0.197677	0.240278	0.207609	0.190618	0.254937	0.28389	protein_coding	HGNC:23242	OTTHUMG00000131917.5_4
ENSG00000153234.14_4	NR4A2	1.45185	0.000109043	0.00168717	1	0.450654	0.333981	0.319463	1.09062	0.949751	0.973066	0.113715	0.0842747	0.0806113	0.2752	0.239654	0.245538	protein_coding	HGNC:7981	OTTHUMG00000131950.10_4
ENSG00000115159.16_3	GPD2	-0.32967	0.00108052	0.0078543	0	31.4086	34.1959	30.7189	25.0063	24.549	27.0837	4.38362	4.77263	4.28735	3.49006	3.42624	3.77999	protein_coding	HGNC:4456	OTTHUMG00000131951.7_3
ENSG00000115170.13_2	ACVR1	0.598285	1.63591e-05	0.000502648	1	29.7628	27.0895	25.826	39.9049	42.7181	42.5108	7.45934	6.78936	6.47269	10.0012	10.7063	10.6543	protein_coding	HGNC:171	OTTHUMG00000131967.10_2
ENSG00000144283.21_4	PKP4	-0.13319	0.041533	0.102247	0	32.4275	32.025	31.7781	30.6152	28.5545	28.5635	3.40446	3.36221	3.33629	3.21419	2.99784	2.9988	protein_coding	HGNC:9026	OTTHUMG00000153969.5_4
ENSG00000115183.15_4	TANC1	0.19554	0.0746357	0.15635	0	184.435	163.725	151.846	212.845	171.492	188.167	12.3657	10.9772	10.1807	14.2706	11.4979	12.6159	protein_coding	HGNC:29364	OTTHUMG00000153945.3_4
ENSG00000196151.10_2	WDSUB1	-0.0417644	0.709901	0.79994	0	6.11322	7.27336	7.63348	6.36842	7.0199	7.05473	2.86333	3.40672	3.5754	2.98287	3.28801	3.30432	protein_coding	HGNC:26697	OTTHUMG00000132028.3_2
ENSG00000123636.18_4	BAZ2B	-0.382628	0.000227247	0.00276191	0	45.516	43.3433	42.354	35.8151	32.147	32.6585	2.24804	2.14073	2.09187	1.76891	1.58774	1.61301	protein_coding	HGNC:963	OTTHUMG00000132027.9_4
ENSG00000224152.1_5	AC009506.1	-0.336907	0.0606648	0.135159	0	2.7823	2.26365	3.22826	2.20071	2.16791	2.1894	1.86231	1.51516	2.16081	1.47303	1.45108	1.46546	lncRNA	NA	OTTHUMG00000154041.1_5
ENSG00000136536.15_4	2021-03-07	-0.206146	0.0281019	0.0769706	0	98.2817	84.0332	80.6896	78.0764	72.883	76.9736	15.63	13.3641	12.8323	12.4167	11.5908	12.2413	protein_coding	HGNC:17393	OTTHUMG00000132029.7_4
ENSG00000241399.7_4	CD302	-0.188864	0.462932	0.592499	0	0.999276	0.834952	0.857505	0.603734	0.681343	1.07443	0.245101	0.204796	0.210328	0.148083	0.167119	0.263534	protein_coding	HGNC:30843	OTTHUMG00000154080.2_4
ENSG00000153246.13_4	PLA2R1	1.87258	1.5095e-05	0.000476659	1	0.529029	0.519525	0.35309	1.53855	1.94079	1.64205	0.0344375	0.0338189	0.0229847	0.100153	0.126337	0.10689	protein_coding	HGNC:9042	OTTHUMG00000154087.4_4
ENSG00000153250.20_4	RBMS1	-0.0178169	0.760829	0.839275	0	61.5632	61.3597	56.444	60.4123	56.8199	59.9044	5.22697	5.20968	4.79233	5.12925	4.82424	5.08612	protein_coding	HGNC:9907	OTTHUMG00000132031.10_4
ENSG00000136560.13_3	TANK	-0.104881	0.13959	0.246655	0	30.3897	30.986	32.5516	27.9276	31.1559	28.2797	5.44717	5.55404	5.83466	5.00584	5.5845	5.06896	protein_coding	HGNC:11562	OTTHUMG00000132037.5_3
ENSG00000115233.12_5	PSMD14	-0.1246	0.0483764	0.114443	0	123.087	117.023	120.891	104.465	114.569	112.105	16.8359	16.0064	16.5356	14.2888	15.6707	15.3338	protein_coding	HGNC:16889	OTTHUMG00000153882.3_5
[truncated: 11,723 more rows]
