# Supplementary material for: Global and context-specific transcriptional consequences of oncogenic Fbw7 mutations
Source: eLife. 2022 Feb 28;11:e74338. doi: 10.7554/eLife.74338 (PMC8926403; doi:10.7554/eLife.74338)
Supplement: Figure 6—source data 2. — This Excel file includes the TRANSFAC & JASPAR, MSigDB, and GO term outputs enriched in differential (upregulated or downregulated) genes in Fbw7−/− NSCs. GO, gene ontology; NSC, neural stem cell. [file elife-74338-fig6-data2.xlsx]

## Sheet: NSC Full Enrichr Output
U5 NSC
Upregulated in Fbw7-/-
TRANSFAC & JASPAR	Overlap	P-value	Adjusted P-value	Old P-value	Old Adjusted P-value	Odds Ratio	Combined Score	Genes
KLF11 (human)	97/1388	5.3387e-11	1.56424e-08	0	0	2.22869	52.7162	SPON2	SERPINE1	HR	ESPN	TMEM92	IL4I1	ISLR	ZFP36	CCND2	PTGDS	SLC16A3	ICOSLG	TSPYL2	PDGFRB	LAG3	ADPRHL1	FST	ISLR2	GBGT1	SLC9A5	ASPHD1	PADI2	MT1G	S100A4	SQSTM1	RRAD	ITPR3	SEZ6L2	CACNA1H	AMDHD2	KIAA1522	TPPP	JAG2	STAT5A	GGT5	CDSN	APCDD1L	PDE2A	COL1A1	NR4A2	ABTB1	FBXL8
KLF4 (human)	99/1485	4.44682e-10	6.51459e-08	0	0	2.11452	45.5334	SPON2	SERPINE1	HR	ESPN	TMEM92	IL4I1	ISLR	ZFP36	CCND2	PTGDS	SLC16A3	ICOSLG	TSPYL2	PDGFRB	LAG3	ADPRHL1	FST	ISLR2	GBGT1	SLC9A5	ASPHD1	PADI2	MT1G	S100A4	SQSTM1	RRAD	TPRG1L	ITPR3	SEZ6L2	CACNA1H	AMDHD2	KIAA1522	TPPP	JAG2	STAT5A	GGT5	CDSN	APCDD1L	PDE2A	COL1A1	NR4A2	ABTB1
CACYBP (human)	90/1350	3.08819e-09	2.9395e-07	0	0	2.09819	41.1154	SPON2	ROBO3	CNTNAP1	STEAP3	ITGB2	TNFAIP2	DNHD1	TCIRG1	LRRC32	ESPN	TMEM92	TGM1	IL4I1	CCND2	ADAMTSL5	AP1G2	CRTAC1	PSD4	PIP5KL1	PRX	CYP1B1	TNKS1BP1	PLEKHN1	PTGDS	SLC16A3	C2ORF81	HGFAC	MAMDC4	LAG3	LYNX1	CDKL5	ARRDC2	MYEOV	RAB3IL1	FOXL1	DISP2	FNDC5	MYL5	MMP11	B3GNT9	VGF	ASPHD1
ZNF148 (human)	101/1591	4.01297e-09	2.9395e-07	0	0	2.00163	38.699	SPON2	SERPINE1	HR	ESPN	TMEM92	TGM1	IL4I1	CCND2	PTGDS	SLC16A3	ICOSLG	TSPYL2	PDGFRB	ADPRHL1	PRKCB	FST	ISLR2	FTSJ1	ASPHD1	PADI2	MT1G	S100A4	RRAD	PDGFA	AK4	ITPR3	SEZ6L2	CACNA1H	CACNA1G	KIAA1522	TPPP	STRA6	JAG2	STAT5A	GGT5	CDSN	APCDD1L	PDE2A	COL1A1	NR4A2	FBXL8	NR4A1
SP3 (human)	87/1332	1.52251e-08	8.92191e-07	0	0	2.0444	36.7999	PRR5	PYGB	COL18A1	ANKRD33B	CD82	FHOD1	BHLHE41	TNFAIP3	HR	LRRC32	ESPN	BBC3	IL4I1	MMP25	ZFP36	HEY1	PIP5KL1	CYP1B1	SLC16A3	ICOSLG	ACVR1	PLEKHG4	LYNX1	CCDC78	ACSL1	SPHK1	PRKCD	CTDSPL	TBC1D8	ISLR2	RHOF	POU3F1	HSPG2	PHKA2	RGMA	FNDC5	FRMD6	KIFC2	ASPHD1	SCN8A	DOK7	COL6A1
SP1 (human)	90/1406	2.16123e-08	1.0554e-06	0	0	2.00266	35.347	PRR5	COL18A1	ANKRD33B	CD82	FHOD1	BHLHE41	TNFAIP3	DUSP15	ESPN	BBC3	MMP25	ZFP36	HEY1	PIP5KL1	CYP1B1	EMILIN1	SLC16A3	ICOSLG	TSPYL2	ACVR1	LYNX1	CCDC78	DUSP1	SPHK1	CTDSPL	ISLR2	POU3F1	HSPG2	PHKA2	HIC1	RGMA	FNDC5	FRMD6	KIFC2	VGF	ASPHD1	SCN8A	IRF1	DOK7	COL6A1	TLCD1	CDH15
PCBP1 (human)	87/1360	3.93806e-08	1.64836e-06	0	0	1.99633	34.0374	PRR5	COL18A1	DOCK5	ANKRD33B	CD82	FHOD1	BHLHE41	TNFAIP3	DUSP15	ESPN	BBC3	MMP25	HEY1	RASSF4	PIP5KL1	CYP1B1	SLC16A3	ICOSLG	ACVR1	LYNX1	CCDC78	DUSP1	SPHK1	CTDSPL	ISLR2	POU3F1	HSPG2	PHKA2	RGMA	FRMD6	KIFC2	ASPHD1	SCN8A	IRF1	DOK7	COL6A1	TLCD1	CDH15	SQSTM1	JDP2	CCDC40	SLC22A4
TEAD4 (human)	86/1354	6.53647e-08	2.39398e-06	0	0	1.97851	32.7311	PRR5	COL18A1	ANKRD33B	BHLHE41	TNFAIP3	ESPN	BBC3	RGS4	RAB42	GJA3	HEY1	RASSF4	PIP5KL1	FDXR	PLEKHN1	ICOSLG	TBC1D10A	TSPYL2	ACVR1	PLEKHG4	CCDC78	ACSL1	CTDSPL	TBC1D8	ISLR2	KAZN	HIC1	RGMA	FNDC5	SLC9A5	KIFC2	ASPHD1	SCN8A	IRF1	PXDN	TRNP1	COL6A1	SPNS1	ITGA7	IRF5	TLCD1	CDH15
TCFAP2A (human)	83/1367	7.40783e-07	2.41166e-05	0	0	1.87492	26.4656	KLLN	COL18A1	DOCK5	ANKRD33B	BHLHE41	PTPRM	DUSP15	ESPN	TMEM92	CCND2	HEY1	ANPEP	PLEKHN1	SLC16A3	ICOSLG	ACVR1	PLEKHG4	TMEM150A	CCDC78	SPHK1	CTDSPL	POU3F1	HSPG2	HIC1	RGMA	CCNA1	FRMD6	KIFC2	SCN8A	COL6A2	DOK7	IRF5	TLCD1	SQSTM1	MGLL	JDP2	CCDC40	SLC22A4	NTM	TCF7	PDGFA	ITPR3
HINFP (human)	154/3047	1.22339e-06	3.58453e-05	0	0	1.58757	21.613	CD82	FHOD1	MLC1	HR	AHR	AQP1	RGS4	IL4I1	FADS2	ISLR	ZFP36	EFEMP1	CCND2	CYP1B1	SLC16A3	TBC1D10A	TGM2	TSPYL2	ACVR1	C11ORF87	LAG3	ST6GAL1	CDKL5	IGFBP5	CCDC78	UNC5B	FST	SEMA6D	PRKCD	CD180	LMO2	MTUS1	ISLR2	HSPG2	FRMD6	SLC9A5	CCDC80	RNF128	LOX	SCN8A	DOK7	ROR2
MIR133B (human)	88/1500	1.40181e-06	3.73391e-05	0	0	1.80939	24.3865	STEAP3	SPEF1	FHOD1	SERPINE1	PTPRM	TNFAIP3	HR	FGF1	DUSP15	AQP1	HERPUD1	COMP	CRTAC1	CREB3L1	PSD4	PIP5KL1	NIPAL3	RPS6KA1	PRX	FDXR	NEFM	PTGDS	ADAMTS9	HTATIP2	MAMDC4	PLEKHG4	LYNX1	WARS	CCDC78	ADPRHL1	RIPK4	LMO2	TRAF1	DKK1	SLC39A14	FTSJ1	RGMA	B3GNT9	ASPHD1	CDHR1	COL6A2	PADI2
TFAP2A (human)	174/3613	4.32471e-06	0.000105595	0	0	1.51378	18.6969	SPON2	FHOD1	HR	CLDN2	TMEM92	AQP1	IL4I1	ISLR	CCND2	NIPAL3	FDXR	CYP1B1	CEP250	PTGDS	SLC16A3	ICOSLG	ACVR1	LAG3	CDKL5	CCDC78	WNT5B	UNC5B	PRKCB	FST	WNT5A	MTUS1	KRT7	ISLR2	KAZN	POU3F1	HSPG2	HIC1	DISP2	BCAN	MYL5	FRMD6	LOX	ASPHD1	SCN8A	DOK7	FSCN1	MT1G
NFE2 (human)	134/2681	1.28825e-05	0.000290353	0	0	1.54593	17.4066	CD82	FHOD1	HR	FGF1	TMEM92	AQP1	TGM1	COMP	IL4I1	ISLR	RASSF4	PTGDS	SLC16A3	TBC1D10A	TSPYL2	ACVR1	C11ORF87	LAG3	S100A2	ADPRHL1	UNC5B	ACSL1	PRKCD	MTUS1	KAZN	TTC7A	POU3F1	DKK1	HIC1	MYL5	SLC9A5	MAPKAPK3	COL4A1	DOK7	NUPR1	RIN1	SQSTM1	PTGES	FLG	RASL12	BEAN1	C5ORF49
MZF1 (human)	78/1389	2.75954e-05	0.000577533	0	0	1.70934	17.9444	CNTNAP1	STEAP3	HHIP	FHOD1	ITGB2	HR	TGM1	CCND2	ADAMTS1	CRTAC1	EMILIN1	PLEKHN1	SLC16A3	PPFIA4	ZNF385A	IER3	PLEKHG4	LAG3	SLC30A3	SEMA6D	MYEOV	RHBDF2	CTDSPL	MTUS1	ISLR2	EPDR1	TRAF1	RHOF	TBC1D2	VGF	ASPHD1	SFRP5	COL6A2	ARHGEF4	KCTD12	KDELR3	GAS6	SQSTM1	HBEGF	MATN2	KCNE4	EPAS1
THRB (human)	104/2034	5.96006e-05	0.0011642	0	0	1.55964	15.1719	STEAP3	CD82	FHOD1	DNHD1	MT1X	ALDH1L2	TMEM92	COMP	IL4I1	FADS2	GJA3	RASSF4	RPS6KA1	SLC16A3	ICOSLG	CCDC78	MTUS1	KAZN	CMBL	FTSJ1	FRMD6	SLC9A5	FRMD8	COL4A1	DDIT4	DOK7	TRIB3	DGKI	TTYH2	TCF7	TPRG1L	PDGFA	ITPR3	CACNA1H	GOLGA7B	PORCN	KIAA1522	CLTCL1	HMOX1	DRD2	PLK3	EGR2
ZBTB7A (human)	75/1373	9.66933e-05	0.0017707	0	0	1.65333	15.2833	KCNG1	DOCK6	COL18A1	CDKN1A	CD82	ITGB2	PTPRM	TNFAIP3	LRRC32	DUSP15	BBC3	MMP25	PIP5KL1	ANPEP	TNKS1BP1	PHLDA1	SLC16A3	LMCD1	CDKL5	CCDC78	SPHK1	SEMA6D	NRG1	POU3F1	PHKA2	TUBA4A	FNDC5	TMEFF2	MAPKAPK3	COL4A1	SCN8A	PXDN	IRF5	TLCD1	MGLL	CCDC40	PCDH10	TCF7	LEF1	PDGFA	THSD1	AGPAT2
TFAP2A (mouse)	87/1663	0.000118542	0.00204311	0	0	1.58541	14.3325	DOCK6	COL18A1	CNTNAP1	ANKRD33B	FRMPD4	ARPC1B	PCSK9	TCIRG1	FGF1	PLB1	IL4I1	GJA3	CRTAC1	TNKS1BP1	HTATIP2	LAG3	MORC4	SLC30A3	PRKCD	MAMDC2	FOXL1	FNDC5	BCAN	DUSP23	VGF	IGDCC4	ASPHD1	OAF	CRISPLD2	TRNP1	ROR1	S100A4	S100A3	ITGA5	TLCD1	MDFI	MATN2	SLC43A2	EBI3	CAMK2A	SEZ6	LTBP2
ELF3 (human)	79/1488	0.000156978	0.00255525	0	0	1.60463	14.0556	COL18A1	ITGB2	TNFAIP2	PCSK9	TCIRG1	DUSP15	ESPN	TMEM92	CCDC102B	AQP1	MT2A	AP1G2	TMEM44	PIP5KL1	ENC1	FLVCR2	PLEKHN1	SLC16A3	ZNF385A	CAST	PLEKHG4	LAG3	IL4R	MYEOV	BGN	KRT7	FOXL1	TUBA4A	RGMA	FNDC5	RNF128	VGF	ASPHD1	ADPRH	TMEM217	S100A4	S100A3	KDELR3	MGLL	PTGES	OPRD1	KCNE4
ETV4 (human)	72/1403	0.000804636	0.0123898	0	0	1.53768	10.9561	COL18A1	SPEF1	ITGB2	MLC1	PCSK9	TCIRG1	DUSP15	TMEM92	BBC3	AQP1	RGS4	MT2A	CCND2	UBASH3B	AP1G2	RPS6KA1	EMILIN1	ZNF385A	ACVR1	MMP7	MAMDC2	BGN	RAB3IL1	NRG1	TM4SF1	SPINT1	VGF	ASPHD1	DOK7	TMEM217	RDH5	IRF5	ITGA5	RHOV	GAS6	HOXB6	TMEM106A	POPDC2	CHRD	GLT8D2	SLC1A4	SEZ6L2
E2F6 (human)	70/1358	0.000845718	0.0123898	0	0	1.54368	10.9221	KCNG1	PRR5	COL18A1	STEAP3	FHOD1	PTPRM	TNFAIP3	HR	LRRC32	MMP25	GJA3	HEY1	ADAMTS1	HYAL1	ENC1	NEFM	SLC16A3	HTATIP2	ACVR1	PLEKHG4	SPHK1	FST	SEMA6D	ARRDC2	POU3F1	HSPG2	ENKUR	DISP2	TMEM37	CCNA1	SLC9A5	LOX	COL6A2	DDIT4	SQSTM1	JDP2	CCDC40	SLFN5	PCDH10	TCF7	ENDOD1	PDGFA
TEAD2 (human)	75/1486	0.000995355	0.0138876	0	0	1.51138	10.4473	PRR5	FAAH	STEAP3	FHOD1	ITGB2	DOCK10	UCHL1	RAB42	ADAMTSL5	CRTAC1	FLVCR2	PTGDS	HGFAC	TSPYL2	ACVR1	PLEKHG4	C11ORF87	CDKL5	MORC4	CCDC78	SLC30A3	SEMA6D	CTDSPL	TBC1D8	NRG1	TUBA4A	GREM1	MYL5	TMEFF2	COL4A2	VGF	SCN8A	COL6A2	PXDN	DOK7	ARHGEF4	TLCD1	SQSTM1	TRIB2	JDP2	DNASE1L1	PCDH10
USF2 (human)	166/3792	0.00110602	0.0146163	0	0	1.33342	9.07657	FRMPD4	SERPINE1	CLDN2	FGF1	TMEM92	FADS2	ZFP36	RAB42	CCND2	CREB3L1	NIPAL3	CHAC1	PHLDA1	SLC16A3	ICOSLG	TGM2	CAST	CCDC78	WNT5B	ADPRHL1	SEMA6D	MTUS1	KAZN	HSPG2	TUBA4A	ENKUR	MYL5	FRMD6	RNF128	ASPHD1	CRISPLD2	SCN8A	SPNS1	PKP1	NUPR1	SQSTM1	DGKI	PTGES	TTYH2	MAOB	KCNE4	C5ORF49
SMAD4 (human)	77/1542	0.00114736	0.0146163	0	0	1.49472	10.1197	DOCK6	PRR5	COL18A1	CDKN1A	SERPINE1	MLC1	F11R	GRPR	LRRC32	FGF1	CLDN1	CCDC102B	PLB1	BBC3	ISLR	ZFP36	EFEMP1	AP1G2	ANPEP	SH2D5	C2ORF81	TBC1D10A	IER3	HLA-DPA1	LYNX1	WNT5B	WNT5A	LMO2	HSPG2	RCN3	COL6A2	TMBIM1	COL6A1	FSCN1	VAMP1	MGLL	PTGES	FLG	TTYH2	LAMA4	EBI3	STXBP2
MIR138 (human)	69/1356	0.00128721	0.0153876	0	0	1.5205	10.1193	CHRM3	COL18A1	DOCK5	ANKRD33B	ITGB2	TNFAIP2	DNHD1	MT1X	TCIRG1	FGF1	ESPN	ELFN1	BEST1	AQP1	COMP	SH3PXD2A	PSD4	PRX	PTGDS	HIST1H2AC	IER3	HTATIP2	IGFBP1	CAST	MAMDC4	PLEKHG4	LYNX1	ADPRHL1	ACSL1	SPHK1	ARRDC2	LMO2	BGN	KAZN	GEM	FNDC5	FNDC1	TMBIM1	COL6A1	IRF5	ROR2	PHLDB2
KLF13 (human)	73/1453	0.00131293	0.0153876	0	0	1.50195	9.96618	FHOD1	ITGB2	RASEF	MLC1	CCDC102B	TGM1	COMP	IL4I1	PIP5KL1	TNKS1BP1	FLVCR2	PTGDS	SLC16A3	C2ORF81	CAST	MAMDC4	MREG	WARS	ARRDC2	MYEOV	MAMDC2	RHBDF2	EPDR1	FOXL1	TTC7A	DKK1	FTSJ1	TMEM37	MMP11	TMEFF2	SLC9A5	SPINT1	PAX8	TRNP1	SPNS1	COL8A1	CDH13	S100A4	ROR2	KCTD12	NUPR1	CDH15
SREBF2 (human)	69/1361	0.00141408	0.0158332	0	0	1.5142	9.93505	KCNG1	SPON2	COL18A1	CD82	SERPINE1	ITGB2	FGF1	DUSP15	PLB1	BBC3	FADS2	ADAMTSL5	ADAMTS1	PSD4	NEFL	TNKS1BP1	FLVCR2	PTGDS	SLC16A3	ZNF385A	PDGFRB	PLEKHG4	LYNX1	RHOF	POU3F1	FTSJ1	RGMA	RIPPLY1	BCAN	MAPKAPK3	VGF	FSCN1	AHRR	KDELR3	MAPT	NUPR1	CDH15	SQSTM1	OSBP2	DNASE1L1	TTYH2	TMEM63C
ZNF281 (human)	53/986	0.00147806	0.0158332	0	0	1.60235	10.4425	PRR5	PYGB	FAAH	ANKRD33B	TNFAIP3	ESPN	ARHGAP6	BBC3	IL4I1	RAB42	HEY1	RASSF4	HYAL1	CREB3L1	NEFM	SLC16A3	ICOSLG	LYNX1	PRKCB	BGN	KAZN	RAB3IL1	RHOF	FTSJ1	TUBA4A	TRNP1	COL6A1	ROR1	PLA2R1	SQSTM1	TRIB2	SLC22A4	SEMA7A	MEGF6	PDGFA	CACNA1H	TSPAN9	GPC1	CLTCL1	CHST15	OPCML	SUSD2
TFAP2C (human)	74/1485	0.00151307	0.0158332	0	0	1.48886	9.66807	KCNG1	SPON2	RYR2	COL18A1	ANKRD33B	TNFAIP3	FGF1	DUSP15	ESPN	ZFP36	RAB42	GJA3	CASP4	FDXR	PLEKHN1	HGFAC	ZNF385A	IER3	ACVR1	MAMDC4	ADPRHL1	ACSL1	SEMA6D	LMO2	MTUS1	TRAF1	POU3F1	SLC39A14	TUBA4A	GEM	MYL5	VGF	DDIT4	DOK7	AHRR	ARHGEF4	ROR1	IRF5	SQSTM1	JDP2	CCDC40	DNASE1L1
GLI2 (human)	73/1465	0.00162956	0.0164642	0	0	1.488	9.55216	PRR5	ROBO3	SPEF1	ITGB2	LRRC32	DOCK10	TGM1	IL4I1	FADS2	ADAMTSL4	TMEM44	HYAL1	PIP5KL1	ENC1	PRX	NEFL	PLEKHN1	SLC16A3	HGFAC	IER3	IGFBP1	MAMDC4	PLEKHG4	ST6GAL1	WARS	ARRDC2	MYEOV	BGN	RAB3IL1	TRAF1	RHOF	POU3F1	FTSJ1	FAHD2A	MMP11	KIFC2	PADI2	KCTD12	TRIB2	TMEM106A	BIRC3	LEF1
USF1 (human)	71/1441	0.00249962	0.0244129	0	0	1.46763	8.79349	ANKRD33B	SERPINE1	ITGB2	BHLHE41	TNFAIP3	ELFN1	BBC3	HERPUD1	RAB42	CCND2	HYAL1	PSD4	AOX1	SLC16A3	HTATIP2	SLC36A1	CAST	MAMDC4	CCDC78	SEMA6D	RAB3IL1	TRAF1	SLC39A14	TM4SF1	ENKUR	GREM1	VGF	ADORA2B	CRISPLD2	SPNS1	PKP1	GAS6	MGLL	DGKI	HLA-DQB1	PTGES	LRRC15	KCNE4	C5ORF49	TCF7	PCDH15	AK4
RELB (human)	72/1469	0.00266119	0.0251525	0	0	1.45965	8.65422	PRR5	CNTNAP1	STEAP3	ANKRD33B	FHOD1	MLC1	TNFAIP3	TCIRG1	ELFN1	BBC3	HERPUD1	MMP25	ZFP36	MT2A	SH3PXD2A	CASP4	FDXR	FLVCR2	ADAMTS9	IGFBP1	PLEKHG4	CCDC78	ARRDC2	MAMDC2	TRAF1	RHOF	POU3F1	RGMA	FNDC5	GREM1	MYL5	VCAN	SLC9A5	LOX	IRF1	TMEM217	PLIN2	IRF5	ROR2	ITGA5	GAS6	RIN2
MYC (human)	65/1302	0.00278724	0.0255207	0	0	1.48503	8.73601	PRR5	ANKRD33B	SERPINE1	ITGB2	BHLHE41	TNFAIP3	ELFN1	BBC3	HERPUD1	RAB42	CCND2	AOX1	SLC16A3	HGFAC	HTATIP2	SLC36A1	CAST	MAMDC4	CBR1	CCDC78	ADPRHL1	UNC5B	SEMA6D	RAB3IL1	TRAF1	ENKUR	MAPKAPK3	VGF	ADORA2B	CRISPLD2	SPNS1	GAS6	MGLL	DGKI	PTGES	LRRC15	KCNE4	EPAS1	C5ORF49	STXBP2	CHRD	PCDH15
HNF4A (mouse)	28/461	0.00379393	0.0336855	0	0	1.80441	10.0584	COL18A1	CLSTN2	TMEM63C	RRBP1	ADAMTS12	THSD1	ZFP36L1	COMP	FADS2	RASD1	HYAL1	EMILIN1	CDKN2B	FZD4	LGI3	LIF	IGFL3	VEGFA	BMP1	KIFC2	COL6A2	PXDN	AHRR	ARHGEF4	PLCD4	MDFI	CRLF1	TMEM45A
MAX (human)	89/1934	0.00515082	0.0443879	0	0	1.3688	7.21164	FAAH	STEAP3	ANKRD33B	FHOD1	SERPINE1	ITGB2	BHLHE41	DNHD1	TNFAIP3	ELFN1	CCDC102B	BBC3	HERPUD1	IL4I1	FADS2	RAB42	CCND2	HEY1	HYAL1	RPS6KA1	ENC1	FDXR	AOX1	SLC16A3	HTATIP2	SLC36A1	CAST	MAMDC4	PLEKHG4	MREG	CDKL5	CCDC78	SLC30A3	SEMA6D	MTUS1	RAB3IL1	TRAF1	SLC39A14	HIC1	ENKUR	VGF	ADORA2B
MSigDB
Epithelial Mesenchymal Transition	53/200	1.16961e-31	5.61413e-30	0	0	10.6053	755.347	OXTR	ECM2	ITGB3	SERPINE1	TNFAIP3	LOXL1	COMP	RGS4	ANPEP	TGM2	PDGFRB	POSTN	WNT5A	BGN	P3H1	DKK1	GEM	GREM1	SFRP4	VCAN	COL4A2	LOX	COL4A1	COL6A2	COL6A3	ITGA5	MATN2	LRRC15	NTM	NID2	THBS1	PTHLH	GPC1	SPOCK1	MSX1	IL32	VCAM1	LUM	TFPI2	FN1	FZD8	VEGFA
p53 Pathway	38/200	1.26118e-17	3.02684e-16	0	0	6.73907	262.23	CDKN1A	STEAP3	CD82	RRAD	PDGFA	SLC7A11	ZFP36L1	PIDD1	CCND2	DRAM1	PERP	MKNK2	FDXR	HMOX1	EPS8L2	IER3	TSPYL2	JAG2	PLK3	CDKN2B	SPHK1	RHBDF2	OSGIN1	LIF	BAIAP2	TM4SF1	PROCR	KRT17	MAPKAPK3	DDIT4	TNFSF9	PLXNB2	CDH13	TRIB3	S100A4	NUPR1	ADA	HBEGF
TNF-alpha Signaling via NF-kB	36/200	5.51555e-16	8.82488e-15	0	0	6.28699	220.886	PTGER4	CDKN1A	CSF1	TNFAIP6	SERPINE1	TNFAIP2	TNFAIP3	ZFP36	DRAM1	CCL2	PHLDA1	ICOSLG	IER3	STAT5A	EGR2	JAG1	LAMB3	DUSP1	SPHK1	LIF	TRAF1	ATP2B1	SOD2	GEM	FOSL2	VEGFA	NR4A2	NR4A1	SPSB1	IRF1	KLF9	TNFSF9	NFKBIE	SQSTM1	HBEGF	BIRC3
Hypoxia	29/200	9.8406e-11	1.18087e-09	0	0	4.80507	110.718	CDKN1A	SERPINE1	TNFAIP3	AK4	MT2A	ZFP36	STC2	GPC1	HMOX1	PPFIA4	IER3	TGM2	IGFBP1	DUSP1	BGN	FOSL2	VEGFA	ISG20	BCAN	LOX	COL5A1	P4HA2	ADORA2B	DDIT4	PKP1	PLIN2	S100A4	KDELR3	TMEM45A
Angiogenesis	13/36	1.24891e-10	1.19896e-09	0	0	15.7647	359.492	JAG2	POSTN	JAG1	LUM	LPL	PDGFA	VEGFA	VCAN	COL3A1	CCND2	S100A4	MSX1	TNFRSF21
Inflammatory Response	26/200	9.71489e-09	7.77191e-08	0	0	4.21432	77.7526	PTGER4	CDKN1A	CSF1	CD82	TNFAIP6	ITGB3	SERPINE1	EBI3	SGMS2	AHR	BEST1	HAS2	CCL2	ICOSLG	KCNJ2	IL4R	CD70	SPHK1	LIF	ATP2B1	DCBLD2	ADORA2B	IRF1	TNFSF9	ITGA5	HBEGF
Interferon Gamma Response	24/200	1.66901e-07	1.14446e-06	0	0	3.83422	59.8364	CD74	CDKN1A	CIITA	IL4R	VCAM1	CFH	TNFAIP6	MX1	TNFAIP2	TNFAIP3	BPGM	SOD2	PML	ISG20	MT2A	HLA-DMA	MTHFD2	IRF1	CASP4	CCL2	METTL7B	IRF5	HLA-DQA1	HLA-DRB1
UV Response Dn	19/144	7.48334e-07	4.49e-06	0	0	4.254	60.0045	PDGFRB	IGFBP5	DUSP1	ITGB3	SERPINE1	PTPRM	ATP2B1	TGFBR2	RGS4	COL1A1	DAB2	COL3A1	EFEMP1	ADORA2B	SCN8A	PMP22	SNAI2	HAS2	MGLL
Myogenesis	21/200	8.34347e-06	4.44985e-05	0	0	3.28371	38.3999	CHRNA1	CDKN1A	ACSL1	SPHK1	FST	SOD3	CACNA1H	COL1A1	FABP3	COL3A1	COL4A2	SCD	STC2	COL6A2	PLXNB2	COL6A3	CDH13	ITGA7	DMD	PPFIA4	HBEGF
Wnt-beta Catenin Signaling	1942-09-01	1.23933e-05	5.9488e-05	0	0	7.55906	85.4049	JAG2	CCND2	JAG1	HEY1	WNT5B	LEF1	TCF7	FZD8	DKK1
Apoptosis	18/161	1.54776e-05	6.75384e-05	0	0	3.51438	38.9257	PDGFRB	CDKN1A	LUM	LEF1	BGN	HSPB1	SOD2	ISG20	CCNA1	CCND2	KRT18	IRF1	CASP4	FDXR	HMOX1	SQSTM1	IER3	BIRC3
Coagulation	15/138	0.000107337	0.000429348	0	0	3.39357	31.0157	MMP7	CFH	ITGB3	SERPINE1	TFPI2	FN1	CTSV	THBS1	COMP	DPP4	MMP11	TF	BMP1	CD9	FBN1
mTORC1 Signaling	18/200	0.000262215	0.000899021	0	0	2.75568	22.7243	CDKN1A	EGLN3	IGFBP5	ITGB2	AK4	SLC1A4	SLC7A11	TUBA4A	FADS2	MTHFD2	SCD	DDIT4	FDXR	CD9	TRIB3	NUPR1	SQSTM1	SKAP2
Glycolysis	18/200	0.000262215	0.000899021	0	0	2.75568	22.7243	PYGB	EGLN3	AK4	PHKA2	CACNA1H	VEGFA	ISG20	VCAN	COL5A1	P4HA2	ADORA2B	STC2	GPC1	DDIT4	KDELR3	PPFIA4	SLC16A3	IER3
Unfolded Protein Response	12/113	0.000632931	0.00202538	0	0	3.29566	24.273	TSPYL2	IGFBP1	MTHFD2	STC2	DDIT4	NABP1	CCL2	SLC1A4	CHAC1	KDELR3	HERPUD1	VEGFA
Apical Junction	17/200	0.000739629	0.00221889	0	0	2.58446	18.6323	CDSN	VCAM1	SLC30A3	LAMB3	ITGA3	RHOF	TRAF1	BAIAP2	THBS3	VCAN	BMP1	ITGA10	ADAM23	FSCN1	CDH15	SKAP2	FBN1
Estrogen Response Early	16/200	0.00196501	0.00524002	0	0	2.41557	15.0545	MREG	ENDOD1	KAZN	HR	SLC1A4	PAPSS2	SEC14L2	KRT18	DEPTOR	MLPH	SYT12	STC2	NRIP1	MAPT	PTGES	TGM2
Complement	16/200	0.00196501	0.00524002	0	0	2.41557	15.0545	CFH	KCNIP3	SERPINE1	PRKCD	TFPI2	FN1	PCSK9	TNFAIP3	CTSV	DOCK10	DPP4	COL4A2	CTSL	IRF1	CASP4	CDH13
Apical Surface	1944-06-01	0.00420499	0.0106231	0	0	4.35636	23.8357	AFAP1L2	ATP8B1	CROCC	PCSK9	HSPB1	DCBLD2
UV Response Up	12/158	0.0101709	0.0244102	0	0	2.27453	10.436	NR4A1	CDKN2B	RRAD	IRF1	NTRK3	PRKCD	HMOX1	CTSV	MSX1	SOD2	SQSTM1	TUBA4A
KRAS Signaling Up	14/200	0.0114711	0.0251371	0	0	2.08462	9.31393	ST6GAL1	CFH	ITGB2	LIF	TNFAIP3	TRAF1	BPGM	DCBLD2	MMP11	CCND2	SCG5	TRIB2	HBEGF	BIRC3
IL-6/JAK/STAT3 Signaling	1987-08-01	0.0115212	0.0251371	0	0	2.79601	12.4802	IL4R	CSF1	ITGB3	IRF1	EBI3	HMOX1	CD9	TNFRSF21
Cholesterol Homeostasis	1974-07-01	0.0152318	0.031788	0	0	2.88235	12.0608	FADS2	JAG1	FABP5	SCD	LPL	CD9	TRIB3
IL-2/STAT5 Signaling	13/199	0.0241828	0.0462766	0	0	1.93292	7.19454	IL4R	AHNAK	CSF1	SPRY4	LIF	AHR	TRAF1	CCND2	COL6A1	PLIN2	PHLDA1	TNFRSF21	TGM2
Estrogen Response Late	13/200	0.0250665	0.0462766	0	0	1.92248	7.08669	TFPI2	HR	SLC1A4	PAPSS2	ISG20	CCNA1	ZFP36	FABP5	PERP	NRIP1	CD9	MAPT	PTGES
Allograft Rejection	13/200	0.0250665	0.0462766	0	0	1.92248	7.08669	CD74	IL4R	CSF1	PRKCB	ITGB2	LIF	HLA-DMA	HLA-DMB	CCND2	CCL2	HLA-DOA	ICOSLG	HLA-DQA1
GO BP *only top 50 listed
extracellular matrix organization (GO:0030198)	70/300	1.22e-37	4.02844e-34	0	0	9.15252	777.935	COL18A1	ECM2	ITGB3	SERPINE1	ITGB2	CTSV	F11R	LOXL1	COMP	MMP25	ADAMTS3	ADAMTSL5	SH3PXD2A	ADAMTSL4	CTSL	ADAMTS1	CREB3L1	CYP1B1	COL10A1	ADAMTS9	POSTN	MMP7	ITGA3	BGN	P3H1	HSPG2	GREM1	BCAN	MMP11	VCAN	COL4A2	LOX	COL4A1	COL6A2	PXDN	COL6A1	COL8A1	COL6A3	ITGA7	ITGA5	GAS6	DDR2
external encapsulating structure organization (GO:0045229)	59/217	7.91049e-36	1.30602e-32	0	0	11.0798	895.523	COL18A1	ECM2	ITGB3	SERPINE1	ITGB2	F11R	LOXL1	COMP	TGM1	MMP25	ADAMTS3	ADAMTSL5	SH3PXD2A	ADAMTSL4	ADAMTS1	COL10A1	ADAMTS9	POSTN	MMP7	ITGA3	BGN	HSPG2	BCAN	MMP11	VCAN	COL4A2	LOX	COL4A1	COL6A2	PXDN	COL6A1	COL8A1	COL6A3	ITGA7	ITGA5	DDR2	LAMA4	PDGFA	NDNF	ADAMTS12	NID2	THBS1
extracellular structure organization (GO:0043062)	58/216	6.59974e-35	7.26411e-32	0	0	10.8751	855.911	COL18A1	ECM2	ITGB3	SERPINE1	ITGB2	F11R	LOXL1	COMP	MMP25	ADAMTS3	ADAMTSL5	SH3PXD2A	ADAMTSL4	ADAMTS1	COL10A1	ADAMTS9	POSTN	MMP7	ITGA3	BGN	HSPG2	BCAN	MMP11	VCAN	COL4A2	LOX	COL4A1	COL6A2	PXDN	COL6A1	COL8A1	COL6A3	ITGA7	ITGA5	DDR2	LAMA4	PDGFA	NDNF	ADAMTS12	NID2	THBS1	ADAMTS14
collagen fibril organization (GO:0030199)	28/89	1.66872e-19	1.37753e-16	0	0	13.0609	564.716	COL18A1	LOXL1	ADAMTS14	ADAMTS3	COL10A1	CYP1B1	COL24A1	LAMB3	LUM	P3H1	GREM1	COL1A1	COL3A1	BMP1	COL4A2	LOX	COL5A1	COL4A1	P4HA2	COL6A2	COL5A3	P4HA3	COL6A1	PXDN	COL6A3	COL8A1	COL9A3	DDR2
supramolecular fiber organization (GO:0097435)	40/351	6.47899e-11	4.27872e-08	0	0	3.67741	86.2716	COL18A1	CEP126	LTBP2	LOXL1	ADAMTS14	ADAMTS3	CALB1	CYP1B1	COL10A1	NEFL	EMILIN1	TPPP	PLK3	COL24A1	LAMB3	LUM	P3H1	RHOF	HSPG2	COL1A1	GREM1	MYO1D	COL3A1	TPPP3	BMP1	COL4A2	LOX	COL5A1	COL4A1	P4HA2	COL5A3	P4HA3	COL6A2	PXDN	COL6A1	COL8A1	COL6A3	COL9A3	MAPT	DDR2
positive regulation of cell migration (GO:0030335)	34/269	1.12057e-10	6.16689e-08	0	0	4.11606	94.3073	LRRC15	CSF1R	DOCK5	CEMIP	SEMA7A	CSF1	LEF1	PDGFA	FGF1	CLDN1	THBS1	HYAL1	HAS2	ACVR1	TNFSF18	PDGFRB	DMTN	MMP7	WNT5B	SPHK1	SEMA6D	NTRK3	FN1	SOD2	VEGFA	COL1A1	SH3RF2	DAB2	CASS4	SNAI2	CDH13	ROR2	DDR2	HBEGF
regulation of cell migration (GO:0030334)	43/408	1.55019e-10	7.31247e-08	0	0	3.37402	76.2106	LRRC15	CSF1R	CEMIP	SEMA7A	CSF1	SERPINE1	CAMK2A	LEF1	CHRD	PDGFA	FGF1	CLDN1	THBS1	DOCK10	PIP5KL1	CYP1B1	HAS2	DRD2	PLXNA3	ACVR1	PDGFRB	CD74	JAG1	MMP7	IGFBP5	WNT5B	SPHK1	SEMA6D	NTRK3	OSGIN1	SOD2	VEGFA	COL1A1	SH3RF2	TMEFF2	DAB2	KRT16	CASS4	SNAI2	PLXNB2	CDH13	ROR2
positive regulation of cell motility (GO:2000147)	28/221	4.70823e-09	1.94332e-06	0	0	4.09973	78.6081	LRRC15	CSF1R	CEMIP	SEMA7A	CSF1	LEF1	PDGFA	FGF1	CLDN1	THBS1	HAS2	ACVR1	PDGFRB	MMP7	WNT5B	SPHK1	SEMA6D	NTRK3	SOD2	VEGFA	COL1A1	SH3RF2	DAB2	CASS4	SNAI2	CDH13	ROR2	HBEGF
positive regulation of cellular process (GO:0048522)	50/625	6.05119e-08	2.22012e-05	0	0	2.48916	41.371	RYR2	CSF1	MLC1	TCIRG1	FGF1	TGM1	ZFP36	CCND2	HYAL1	RPS6KA1	TGM2	PDGFRB	SPHK1	PRKCD	WNT5A	TBC1D8	NRG1	DKK1	TGFBR2	GREM1	MAPT	NUPR1	GAS6	HBEGF	CSF1R	MYRF	LEF1	CHRD	PDGFA	THBS1	PTHLH	ZFP36L1	DPP4	HAS2	TPPP	PRODH	TUB	TNFSF18	EGR2	NTRK3	IL34	FN1
cell-matrix adhesion (GO:0007160)	17/100	7.01272e-08	2.3156e-05	0	0	5.72808	94.3584	VCAM1	ECM2	ITGA3	ITGB3	ITGB2	FN1	ADAMTS12	L1CAM	NID2	THSD1	THBS3	COL3A1	ITGA10	ITGA11	ITGA7	EMILIN1	ADAMTS9
interferon-gamma-mediated signaling pathway (GO:0060333)	14/68	8.35509e-08	2.50805e-05	0	0	7.22995	117.832	CIITA	HLA-DRB5	VCAM1	PRKCD	CAMK2A	PML	MT2A	IRF1	HLA-DPB1	IRF5	HLA-DQA1	HLA-DRB1	HLA-DPA1	HLA-DQB1
positive regulation of cell population proliferation (GO:0008284)	41/474	1.22217e-07	3.363e-05	0	0	2.69397	42.8812	CSF1R	CDKN1A	CSF1	LEF1	CHRD	PDGFA	TCIRG1	FGF1	THBS1	PTHLH	AQP1	DPP4	CCND2	RASSF10	HYAL1	HMOX1	HAS2	PDGFRB	CD74	SPHK1	NTRK3	IL34	WNT5A	FN1	LIF	TBC1D8	NRG1	TBX2	VEGFA	TGFBR2	GREM1	MLXIPL	KITLG	GDNF	TMEM119	CDH13	GAS6	FGFR4	CRLF1	HBEGF	DDR2
regulation of cell population proliferation (GO:0042127)	56/764	1.8434e-07	4.68224e-05	0	0	2.26888	35.1824	COL18A1	CDKN1A	CSF1	TCIRG1	FGF1	DUSP15	CCND2	ADAMTS1	CYP1B1	PDGFRB	TBC1D8	P3H1	NRG1	TGFBR2	GREM1	SFRP4	SFRP5	IRF1	TRNP1	CDH13	ROR2	NUPR1	HBEGF	CSF1R	LEF1	PDGFA	THBS1	PTHLH	ZFP36L1	DPP4	CYP27B1	HAS2	DRD2	JAG2	STAT5A	CGREF1	CDKN2B	EGLN3	JAG1	NTRK3	IL34	FN1
positive regulation of fibroblast proliferation (GO:0048146)	2022-09-28	2.9853e-07	7.04105e-05	0	0	13.1384	197.397	CD74	CDKN1A	SPHK1	WNT5A	FN1	PDGFA	GAS6	AQP1	DDR2
negative regulation of signal transduction (GO:0009968)	27/267	9.35955e-07	0.000206035	0	0	3.16662	43.958	HHIP	PALM3	TNFAIP3	ADAMTS12	THBS1	UBASH3B	HEY1	CREB3L1	GPC1	EMILIN1	CHAC1	DRD2	ACVR1	IGFBP5	PRKCB	GDF15	PRKCD	SPRY4	DKK1	HIC1	NR4A2	SFRP4	SFRP5	DDIT4	TMBIM1	SNAI2	MDFI
cellular response to interferon-gamma (GO:0071346)	17/121	1.17082e-06	0.000241629	0	0	4.56645	62.3677	HLA-DRB5	CIITA	VCAM1	PRKCD	WNT5A	CAMK2A	PML	MT2A	IRF1	HLA-DPB1	CCL2	IRF5	HLA-DQA1	HLA-DRB1	SLC26A6	HLA-DPA1	HLA-DQB1
regulation of angiogenesis (GO:0045765)	22/203	3.04575e-06	0.000521873	0	0	3.4067	43.2711	PRKCB	SPHK1	SERPINE1	WNT5A	PTPRM	HSPB1	TNFAIP3	FGF1	HSPG2	THBS1	PML	AQP1	VEGFA	COL4A2	HYAL1	ADAMTS1	ADM2	CYP1B1	HMOX1	EMILIN1	TEK	HTATIP2
cellular response to growth factor stimulus (GO:0071363)	19/158	3.08854e-06	0.000521873	0	0	3.82275	48.5023	ACVR1	SPHK1	NTRK3	WNT5A	PDE2A	HSPB1	NDNF	ADAMTS12	ZFP36L1	TGFBR2	VEGFA	NR4A1	ZFP36	HYAL1	MT1G	SNAI2	CCL2	HAS2	MAPT
skeletal system development (GO:0001501)	19/158	3.08854e-06	0.000521873	0	0	3.82275	48.5023	PTGER4	HHIP	WNT5A	CHRD	P3H1	BMP8B	PAPSS2	PTHLH	RFLNA	COMP	COL1A1	BCAN	VCAN	SNORC	BMP1	HYAL1	COL10A1	TGM2	FBN1
endoderm formation (GO:0001706)	1936-09-01	3.16095e-06	0.000521873	0	0	9.24173	117.043	LAMB3	COL4A2	DUSP1	ITGB2	COL6A1	FN1	COL8A1	ITGA7	ITGA5
skin development (GO:0043588)	13/80	4.09082e-06	0.000643232	0	0	5.39942	66.9894	FLG	CDSN	JAG1	ITGA3	WNT5A	PDGFA	CLDN1	TGM1	COL1A1	COL3A1	COL5A1	KRT16	COL5A3
response to cAMP (GO:0051591)	1938-09-01	5.13892e-06	0.000771305	0	0	8.60347	104.779	DMTN	IGFBP5	VGF	PDE2A	AHR	HCN2	SLC26A6	AQP1	ZFP36L1
collagen-activated signaling pathway (GO:0038065)	2022-05-09	5.9675e-06	0.000856726	0	0	34.4993	414.998	COL1A1	COL4A2	UBASH3B	ITGA11	DDR2
negative regulation of chondrocyte differentiation (GO:0032331)	2022-06-15	7.09947e-06	0.000976769	0	0	18.4212	218.392	GREM1	EFEMP1	SNAI2	ADAMTS12	PTHLH	RFLNA
cellular response to cAMP (GO:0071320)	2022-08-31	8.70752e-06	0.00115009	0	0	9.63168	112.222	DMTN	IGFBP5	PDE2A	AHR	HCN2	SLC26A6	AQP1	ZFP36L1
negative regulation of apoptotic process (GO:0043066)	37/485	9.5599e-06	0.00121411	0	0	2.3338	26.9739	LEF1	HSPB1	NDNF	THBS1	AQP1	COMP	PIDD1	CCND2	RPS6KA1	CCL2	APOE	HTATIP2	TNFSF18	PLK3	CD74	UNC5B	SPHK1	PRKCD	WNT5A	SOD2	DKK1	HYPK	VEGFA	NR4A2	GREM1	SH3RF2	DAB2	KRT18	GDNF	SNAI2	ITGA5	NUPR1	TEK	GAS6	SQSTM1	CRLF1	BIRC3
endodermal cell differentiation (GO:0035987)	1932-08-01	1.12539e-05	0.00131949	0	0	9.22989	105.173	LAMB3	COL4A2	ITGB2	COL6A1	FN1	COL8A1	ITGA7	ITGA5
myelin assembly (GO:0032288)	2022-05-10	1.15885e-05	0.00131949	0	0	27.598	313.665	CNTNAP1	GPC1	PMP22	CD9	TPPP
positive regulation of monocyte differentiation (GO:0045657)	2022-05-10	1.15885e-05	0.00131949	0	0	27.598	313.665	CD74	CSF1	IL34	HLA-DRB1	ZFP36L1
GO CC *only top 20 listed
collagen-containing extracellular matrix (GO:0062023)	60/380	8.32487e-23	2.00629e-20	0	0	5.52484	280.884	COL18A1	SERPINE1	LOXL1	COMP	EFEMP1	ADAMTS3	ADAMTSL4	CTSL	ADAMTS1	COL10A1	EMILIN1	ADAMTS9	TGM2	POSTN	WNT5B	WNT5A	BGN	P3H1	HSPG2	GREM1	TMEFF2	VCAN	COL4A2	COL4A1	COL6A2	PXDN	COL6A1	COL8A1	CDH13	COL6A3	S100A4	MATN2	FLG	LRRC15	SEMA7A	LAMA4	LTBP2	NID2	THBS1	THBS3	SRPX2	GPC1
endoplasmic reticulum lumen (GO:0005788)	39/285	3.73549e-13	4.50127e-11	0	0	4.54154	129.959	COL18A1	CSF1	EBI3	PDGFA	PCSK9	THBS1	ADAMTSL4	STC2	ARSI	COL10A1	APOE	APOL1	IGFBP1	COL24A1	IGFBP5	WNT5B	WNT5A	FN1	P3H1	COL1A1	TF	COL3A1	VCAN	COL4A2	COL5A1	VGF	COL4A1	P4HA2	COL5A3	P4HA3	COL6A2	COL6A1	COL8A1	RDH5	COL6A3	COL9A3	MELTF	GAS6	FBN1
MHC class II protein complex (GO:0042613)	2022-09-13	4.97001e-11	3.99257e-09	0	0	62.4561	1481.77	HLA-DRB5	HLA-DMA	HLA-DMB	HLA-DPB1	HLA-DOA	HLA-DQA1	HLA-DRB1	HLA-DPA1	HLA-DQB1
MHC protein complex (GO:0042611)	2022-09-20	9.351e-09	5.63398e-07	0	0	22.7031	419.729	HLA-DRB5	HLA-DMA	HLA-DMB	HLA-DPB1	HLA-DOA	HLA-DQA1	HLA-DRB1	HLA-DPA1	HLA-DQB1
clathrin-coated endocytic vesicle (GO:0045334)	16/85	3.83849e-08	1.85015e-06	0	0	6.48028	110.655	CD74	CEMIP	HLA-DRB5	FZD4	WNT5A	TF	CLTCL1	HLA-DPB1	CD9	ROR2	APOE	HLA-DQA1	HLA-DRB1	HLA-DPA1	HBEGF	HLA-DQB1
clathrin-coated endocytic vesicle membrane (GO:0030669)	14/69	1.01463e-07	4.07542e-06	0	0	7.09813	114.305	CD74	HLA-DRB5	FZD4	WNT5A	TF	HLA-DPB1	CD9	ROR2	APOE	HLA-DQA1	HLA-DRB1	HLA-DPA1	HBEGF	HLA-DQB1
lysosome (GO:0005764)	41/477	1.44929e-07	4.98969e-06	0	0	2.67501	42.1235	AHNAK	STXBP2	MLC1	PCSK9	TCIRG1	CTSV	BBC3	DPP4	HLA-DMA	HLA-DMB	DRAM1	CTSL	HYAL1	ANPEP	GPC1	HLA-DOA	HLA-DQA1	HLA-DPA1	SLC36A1	CD74	HLA-DRB5	LUM	PRKCD	BGN	EPDR1	HSPG2	SLC39A14	TPCN1	BCAN	DAB2	VCAN	TMBIM1	COL6A1	HLA-DPB1	SPNS1	CSPG4	ATP13A2	CYB561	ADA	HLA-DRB1	HLA-DQB1
intracellular organelle lumen (GO:0070013)	59/848	4.95274e-07	1.49201e-05	0	0	2.14561	31.1503	COL18A1	CSF1	TNFAIP6	PCSK9	ALDH1L2	ADAMTSL4	CTSL	FDXR	COL10A1	IGFBP1	IGFBP5	WNT5B	WNT5A	RHBDF2	BGN	P3H1	HSPG2	BCAN	MMP11	VCAN	COL4A2	VGF	MTHFD2	CRISPLD2	COL4A1	COL6A2	COL6A1	COL8A1	RDH5	COL6A3	GAS6	EBI3	PDGFA	AK4	THBS1	STC2	GPC1	ARSI	APOE	APOL1	PCK2	COL24A1
clathrin-coated vesicle membrane (GO:0030665)	14/90	2.99857e-06	8.02951e-05	0	0	5.1312	65.2554	CD74	HLA-DRB5	FZD4	WNT5A	TF	HLA-DPB1	CD9	ROR2	APOE	HLA-DQA1	HLA-DRB1	HLA-DPA1	HBEGF	HLA-DQB1
endocytic vesicle (GO:0030139)	21/189	3.42061e-06	8.21339e-05	0	0	3.50073	44.0591	CD74	CEMIP	HLA-DRB5	WNT5B	SPHK1	WNT5A	CAMK2A	DPP4	EHD2	TF	CTSL	CLTCL1	HLA-DPB1	CD9	APOE	HLA-DQA1	HLA-DRB1	RAB11FIP5	HLA-DPA1	HBEGF	HLA-DQB1
cell-cell junction (GO:0005911)	26/271	3.94389e-06	8.21339e-05	0	0	2.98192	37.105	AHNAK	ITGB3	PTPRM	CLDN2	F11R	CLDN1	CYTH3	PDZD2	PDLIM2	PERP	TNKS1BP1	CCN3	CDSN	JAG1	KAZN	BAIAP2	VEGFA	GJB2	KRT18	GJB6	FSCN1	PKP1	ITGA5	TEK	FGFR4	JCAD
vacuolar lumen (GO:0005775)	19/161	4.08965e-06	8.21339e-05	0	0	3.7414	46.4197	PYGB	CD74	LUM	PRKCD	BGN	CTSV	HSPG2	CPPED1	BCAN	VCAN	FABP5	CTSL	HYAL1	IMPDH1	NAPRT	GPC1	PADI2	CSPG4	ATP13A2
integral component of plasma membrane (GO:0005887)	84/1454	4.53858e-06	8.41383e-05	0	0	1.77276	21.8101	CHRM3	CNTNAP1	OXTR	CD82	ITGB3	HHIP	GRIK4	PTPRM	TCIRG1	GRPR	LRRC32	CLDN1	AQP1	FADS2	GJA3	ADGRE5	SLC16A3	HLA-DPA1	ACVR1	PDGFRB	TMEM150A	IL4R	SLC30A3	SEMA6D	SLC39A14	TM4SF1	PROCR	ADORA2B	SCN8A	CDHR1	VAMP1	ROR1	ROR2	TNFRSF21	HBEGF	DDR2	SLC22A4	OPRD1	CHRNA1	CSF1R	SEMA7A	PCDH10
Golgi lumen (GO:0005796)	14/100	1.06012e-05	0.000182493	0	0	4.53219	51.9141	WNT5B	LUM	WNT5A	RHBDF2	BGN	PDGFA	HSPG2	SOD3	BCAN	MMP11	VCAN	GPC1	CSPG4	GAS6
lytic vacuole membrane (GO:0098852)	24/267	2.71688e-05	0.000436511	0	0	2.76732	29.0941	SLC36A1	CD74	HLA-DRB5	AHNAK	PCSK9	TCIRG1	SLC39A14	TPCN1	DPP4	HLA-DMA	DAB2	HLA-DMB	ANPEP	COL6A1	TMBIM1	HLA-DPB1	SPNS1	ATP13A2	HLA-DOA	CYB561	HLA-DQA1	HLA-DRB1	HLA-DPA1	HLA-DQB1
integral component of lumenal side of endoplasmic reticulum membrane (GO:0071556)	2022-07-28	4.0311e-05	0.000571468	0	0	9.21808	93.2767	CD74	HLA-DRB5	HLA-DPB1	HLA-DQA1	HLA-DRB1	HLA-DPA1	HLA-DQB1
lumenal side of endoplasmic reticulum membrane (GO:0098553)	2022-07-28	4.0311e-05	0.000571468	0	0	9.21808	93.2767	CD74	HLA-DRB5	HLA-DPB1	HLA-DQA1	HLA-DRB1	HLA-DPA1	HLA-DQB1
endocytic vesicle membrane (GO:0030666)	17/158	4.3427e-05	0.000581439	0	0	3.36167	33.7661	CD74	HLA-DRB5	WNT5B	FZD4	WNT5A	CAMK2A	TCIRG1	TF	HLA-DPB1	CD9	ROR2	APOE	HLA-DQA1	HLA-DRB1	HLA-DPA1	HBEGF	HLA-DQB1
lysosomal lumen (GO:0043202)	1986-12-01	4.63716e-05	0.000588187	0	0	4.50445	44.9491	BCAN	CD74	VCAN	CTSL	HYAL1	LUM	GPC1	BGN	ATP13A2	CSPG4	CTSV	HSPG2
lysosomal membrane (GO:0005765)	26/330	0.000118069	0.00142274	0	0	2.39575	21.6677	AHNAK	MGST1	PCSK9	TCIRG1	DPP4	HLA-DMA	HLA-DMB	ANPEP	HLA-DOA	HLA-DQA1	HLA-DPA1	SLC36A1	CD74	HLA-DRB5	SLC39A14	TPCN1	DAB2	COL6A1	TMBIM1	HLA-DPB1	SPNS1	VAMP1	ATP13A2	CYB561	HLA-DRB1	HLA-DQB1
U5 NSC
Downregulated in Fbw7-/-
TRANSFAC & JASPAR	Overlap	P-value	Adjusted P-value	Old P-value	Old Adjusted P-value	Odds Ratio	Combined Score	Genes
TCFAP2A (human)	50/1367	3.15013e-05	0.00878887	0	0	1.96601	20.3786	CDKN1C	WWC2	LRRC4	MSI1	IKZF2	CDH4	SOX1	ADAMTSL3	SOX8	KIF1A	BVES	SAMD11	NKX6-2	TGIF2	KCND3	FIBCD1	GAB1	DKK3	C1QL1	TOX3	EEF1A2	GAS1	2022-09-03	PNCK	CABP7	PDGFB	ZDHHC23	FIGN	PRKCZ	CXXC4	GNG4	CBS	RGS20	SLIT2	RHBDL3	CACNG4	E2F8	PHF10	WSCD1	PBX3	SMAD6	SMAD7
EGR1 (human)	29/681	0.000134614	0.0187522	0	0	2.25306	20.0818	PELI2	LRRC4	BACH2	ARHGAP42	SOX1	ALDH2	SOX8	GPC4	RAB6B	RUNX1T1	E2F8	RFTN2	GK	KCNJ8	PHF10	TCF12	F3	SMAD7	ACTA1	GKAP1	ID2	PITPNM3	ID1	EEF1A2	PDE3A	GAS1	TOX	SSBP3	TP73
SRF (human)	97/3420	0.000201637	0.0187522	0	0	1.55244	13.2098	RAB3A	C4ORF19	MSI1	ANTXR1	LIPE	EDNRB	RPS6KA2	SLC16A7	STK32A	BVES	SCN1A	CA13	KCNH2	TKTL1	STON1-GTF2A1L	FOXP2	ASRGL1	NPAS4	TXLNB	RFX4	MYL9	C21ORF62	EPHA3	RNF180	TXK	PRKCZ	LTBP1	IGSF9	SKA2	BRIP1	MAP2	ZNF704	CEP70	FLRT1	MAP7	PROM1	LRRC4C	RAB6B	TMEM86A	SIAH3	DCLK2	AIF1L
TEAD4 (human)	46/1354	0.000358927	0.0250352	0	0	1.80166	14.2914	CDKN1C	PNCK	PELI2	LRRC4	ANTXR1	GNG4	CBS	GNG7	STMN1	REPS2	KIF1A	STK32A	GAL3ST3	SAMD11	LRRC4B	E2F8	BARD1	KCNH2	TCF7L2	MEF2C	NKX6-2	TGIF2	GK	PHF10	PBX3	DKK3	C1QL1	GADD45G	SMAD7	NPAS4	NELL2	NELL1	TTC9	TMSB15A	RFX4	MGAT4A	ID2	EEF1A2	YPEL1	EBPL	NOTUM	INSM1
MSigDB
TGF-beta Signaling	1954-06-01	0.000735893	0.0323793	0	0	6.15523	44.4064	CDKN1C	ID2	ID1	ID3	SMAD6	SMAD7
GO BP
nervous system development (GO:0007399)	29/447	3.63724e-08	7.82008e-05	0	0	3.55776	60.9424	GPM6A	NLGN1	ZC4H2	MSI1	ASCL1	CYP46A1	VXN	RPS6KA6	EDNRB	DPYSL5	SOX8	SH3GL2	SEMA6B	MEF2C	ADGRV1	PAX6	GFRA1	PCDHB11	POU3F3	NELL1	MARCKS	MAB21L2	PCDHB5	CSPG5	PCDHB4	TAGLN3	FGF13	APBA2	FGF12
GO CC
filopodium (GO:0030175)	1958-07-01	0.000158828	0.027636	0	0	6.77471	59.263	ACTA2	ACTA1	GPM6A	ACTC1	MAP2	FGF13	ANTXR1
[truncated: 132 more columns]

## Sheet: Summary - Enrichr Output
Gene set	TRANSFAC & JASPAR		MSigDB		GO BP		GO CC
Upregulated in Fbw7-/- NSC	KLF11 (human)	1.56424e-08	Epithelial Mesenchymal Transition	5.61413e-30	extracellular matrix organization (GO:0030198)	4.02844e-34	collagen-containing extracellular matrix (GO:0062023)	2.00629e-20
	SP3 (human)	8.92191e-07	p53 Pathway	3.02684e-16	regulation of cell migration (GO:0030334)	7.31247e-08	MHC class II protein complex (GO:0042613)	3.99257e-09
	TFAP2A (human)		TNF-alpha Signaling via NF-kB	8.82488e-15	regulation of cell population proliferation (GO:0042127)	4.68224e-05	clathrin-coated endocytic vesicle (GO:0045334)	1.85015e-06
	NFE2 (human)		Hypoxia	1.18087e-09	cellular response to interferon-gamma (GO:0071346)	0.000241629	intracellular organelle lumen (GO:0070013)	1.49201e-05
			Interferon Gamma Response	1.14446e-06	regulation of angiogenesis (GO:0045765)	0.000521873	cell-cell junction (GO:0005911)	8.21339e-05
			UV Response Dn	4.49e-06
			Myogenesis	4.44985e-05
			Wnt-beta Catenin Signaling	5.9488e-05
			mTORC1 Signaling	0.000899021
			Unfolded Protein Response	0.00202538
			Apical Junction	0.00221889
			Estrogen Response Early	0.00524002
			Apical Surface	0.0106231
			UV Response Up	0.0244102
			KRAS Signaling Up	0.0251371
			Cholesterol Homeostasis	0.031788
			IL-2/STAT5 Signaling	0.0462766
			Estrogen Response Late	0.0462766
Downreuglated in Fbw7-/- NSC	TCFAP2A (human)		TGF-beta Signaling		nervous system development (GO:0007399)		filopodium (GO:0030175)
