# Supplementary material for: Global and context-specific transcriptional consequences of oncogenic Fbw7 mutations
Source: eLife. 2022 Feb 28;11:e74338. doi: 10.7554/eLife.74338 (PMC8926403; doi:10.7554/eLife.74338)
Supplement: Figure 6—source data 3. — (U5F=Fbw7−/− and U5W=WT). NSC, neural stem cell; WT, wild-type. [file elife-74338-fig6-data3.xlsx]

## Sheet: U5NSC Jun increased in Fbw7-Del
Geneid	Chr	Start	End	Strand	Length	logFC	logCPM	PValue	FDR	Sample_NT_HsSc_U5F1_Jun_0218.FPKM	Sample_NT_HsSc_U5F2_Jun_0218.FPKM	Sample_NT_HsSc_U5F3_Jun_0218.FPKM	Sample_NT_HsSc_U5W1_Jun_0218.FPKM	Sample_NT_HsSc_U5W2_Jun_0218.FPKM	Sample_NT_HsSc_U5W3_Jun_0218.FPKM
chr1:6217265:6218400	chr1	6217265	6218400	.	1136	0.954977	4.166	9.17032e-07	5.05351e-05	18.2249	23.4054	19.8248	11.1509	8.11683	12.4185
chr1:7051217:7051802	chr1	7051217	7051802	.	586	0.927433	3.056	0.000618575	0.00775791	18.6236	14.3123	20.5994	11.6847	8.58273	7.82408
chr1:7342007:7342263	chr1	7342007	7342263	.	257	2.33093	1.39677	5.75847e-05	0.00127318	19.9834	11.8039	12.6188	4.66253	3.26166	0.686159
chr1:7767672:7768047	chr1	7767672	7768047	.	376	2.10328	1.14219	0.000743347	0.00892582	9.81732	8.54266	5.75004	1.36581	0.891752	3.28298
chr1:7946368:7946878	chr1	7946368	7946878	.	511	1.16383	2.42354	0.000628581	0.00785217	14.1333	11.8732	14.8083	4.01992	6.56162	7.59206
chr1:8008833:8009569	chr1	8008833	8009569	.	737	1.00334	3.42678	3.63867e-05	0.000888913	19.5987	21.3071	15.6455	8.36165	9.78144	10.0494
chr1:8100390:8101115	chr1	8100390	8101115	.	726	0.624713	4.83555	2.92778e-05	0.000758512	43.7705	48.6673	49.1367	28.5303	33.0218	30.1191
chr1:8121242:8122498	chr1	8121242	8122498	.	1257	1.6409	2.30537	9.70956e-06	0.00031972	4.46875	6.3883	5.8766	1.63419	2.26733	1.40289
chr1:8135537:8136142	chr1	8135537	8136142	.	606	1.74989	3.14104	4.16764e-09	6.8262e-07	18.8035	20.6126	25.5684	8.47434	7.74618	2.90995
chr1:8136393:8138057	chr1	8136393	8138057	.	1665	1.13538	4.90985	1.5258e-12	1.18944e-09	22.652	26.901	24.1306	10.4868	12.0828	10.9089
chr1:8149938:8150768	chr1	8149938	8150768	.	831	0.786694	5.22618	1.68494e-08	2.13714e-06	64.5057	53.6843	51.1668	37.491	30.6651	30.1332
chr1:8155864:8158041	chr1	8155864	8158041	.	2178	0.696003	4.67059	1.38083e-05	0.00042	15.106	11.962	15.7171	8.25256	8.62109	9.55392
chr1:9472943:9473581	chr1	9472943	9473581	.	639	1.03549	2.74804	0.000539832	0.00700459	12.558	14.5215	13.2518	8.03669	5.77197	5.7953
chr1:9760210:9760868	chr1	9760210	9760868	.	659	1.42827	2.97631	1.09112e-06	5.80538e-05	20.4572	17.0594	12.3028	5.45495	5.85119	7.22497
chr1:13931533:13932063	chr1	13931533	13932063	.	531	1.47536	3.37989	2.47707e-08	2.90906e-06	29.0155	26.8846	27.8226	14.5069	8.20882	7.3061
chr1:15354139:15355324	chr1	15354139	15355324	.	1186	0.645594	4.40607	0.000213078	0.0034719	18.8097	19.8608	25.8251	11.4025	13.9943	15.7608
chr1:15733748:15734077	chr1	15733748	15734077	.	330	1.52599	2.23271	5.02032e-05	0.00114651	22.8579	15.1409	20.7466	5.70605	6.09634	8.54995
chr1:16006717:16007802	chr1	16006717	16007802	.	1086	0.974133	3.20805	0.000178654	0.00303512	10.197	12.488	9.95403	4.41352	7.10117	5.03372
chr1:16938709:16939590	chr1	16938709	16939590	.	882	1.27052	2.27547	0.000595314	0.00754152	4.18516	7.8905	9.80506	2.13492	2.47102	4.39857
chr1:20193177:20193900	chr1	20193177	20193900	.	724	1.00738	4.0556	5.14661e-07	3.26093e-05	35.2461	26.8656	27.8713	13.2406	15.5145	16.0754
chr1:21304986:21305549	chr1	21304986	21305549	.	564	1.3241	2.13333	0.000810663	0.00949102	11.667	13.2886	5.75004	3.03513	2.37801	6.87862
chr1:24592776:24593781	chr1	24592776	24593781	.	1006	0.973858	3.6124	2.16442e-05	0.000594721	12.9223	17.9156	16.2975	7.65723	7.16593	9.11513
chr1:27438282:27439081	chr1	27438282	27439081	.	800	1.18835	4.34552	3.2104e-10	8.70068e-08	31.2959	34.351	38.7361	14.3365	15.9267	15.43
chr1:27831519:27831995	chr1	27831519	27831995	.	477	0.736311	3.92677	0.000243459	0.00382586	38.0201	40.403	38.5265	26.1976	23.5482	20.333
chr1:28143657:28144258	chr1	28143657	28144258	.	602	1.18202	3.43602	1.76108e-06	8.5205e-05	27.4596	24.8995	20.0519	10.8055	11.418	9.66663
chr1:28296997:28297441	chr1	28296997	28297441	.	445	1.85445	1.53165	0.000326137	0.0047727	12.2623	6.41606	8.09744	2.30807	2.26044	2.77393
chr1:29298624:29299533	chr1	29298624	29299533	.	910	0.7305	4.09905	0.000147915	0.00262397	24.3383	20.0017	24.7483	11.4748	17.1334	12.9835
chr1:31482961:31483948	chr1	31482961	31483948	.	988	0.859655	3.54006	0.000205348	0.00337234	16.569	15.1716	12.4002	9.18282	6.78742	8.38877
chr1:31779009:31779701	chr1	31779009	31779701	.	693	0.79907	3.58347	0.000621974	0.00778646	23.8538	18.7974	21.3186	11.8567	17.4181	7.37942
chr1:32705890:32707587	chr1	32705890	32707587	.	1698	0.839387	3.50583	0.000292092	0.00439869	8.50663	7.88192	8.59459	4.23417	4.93667	4.77725
chr1:33195250:33196065	chr1	33195250	33196065	.	816	1.12736	3.43816	4.10739e-06	0.000164343	18.8814	18.1508	15.8972	8.18147	7.19084	8.86036
chr1:33226913:33227586	chr1	33226913	33227586	.	674	2.30747	1.71184	4.72585e-06	0.000183481	5.95296	10.3255	5.61354	1.26989	0.994952	2.09309
chr1:33405186:33405893	chr1	33405186	33405893	.	708	1.07167	4.23956	1.80804e-08	2.26021e-06	37.8561	33.7738	34.863	15.7158	17.9963	16.9369
chr1:33418943:33419427	chr1	33418943	33419427	.	485	1.42144	2.18535	0.000272437	0.0041652	7.94186	10.3021	20.0599	7.05903	4.14803	2.90875
chr1:33433670:33434317	chr1	33433670	33434317	.	648	1.88527	2.30375	6.78576e-07	4.04117e-05	10.8976	12.1167	10.5654	2.90586	2.58718	3.53774
chr1:33457907:33458561	chr1	33457907	33458561	.	655	0.822897	4.1012	2.32628e-05	0.000630704	37.2439	29.6957	31.3575	21.169	14.3334	20.1919
chr1:33847889:33849085	chr1	33847889	33849085	.	1197	0.822985	3.70379	0.000165324	0.0028547	15.5531	13.1189	11.8908	8.58053	6.72278	7.66067
chr1:35249037:35249722	chr1	35249037	35249722	.	686	2.11858	1.71326	1.86038e-05	0.000527258	5.14697	7.54366	8.40434	1.49721	0.733161	2.57059
chr1:35265693:35266172	chr1	35265693	35266172	.	480	2.09197	1.62042	4.11961e-05	0.000982194	7.35587	7.06351	13.5126	1.78314	2.79416	1.8369
chr1:36197605:36198070	chr1	36197605	36198070	.	466	1.48803	1.8098	0.000783866	0.00925853	7.57687	11.105	11.5988	2.5714	4.67691	3.40576
chr1:36703830:36704790	chr1	36703830	36704790	.	961	2.02603	2.00304	5.99202e-06	0.000221721	7.34822	8.35598	2.62472	2.4938	1.04672	0.917496
chr1:38398246:38399089	chr1	38398246	38399089	.	844	1.34519	2.29549	0.00018568	0.0031215	7.22593	7.18861	8.9657	3.65079	2.97955	2.50724
chr1:38423975:38424856	chr1	38423975	38424856	.	882	0.845573	4.11309	1.49849e-05	0.000446777	19.4701	23.6715	31.2536	13.3918	14.6361	13.1957
chr1:38504457:38505269	chr1	38504457	38505269	.	813	1.53086	3.15704	4.05648e-08	4.3499e-06	15.99	16.6814	14.4046	5.47444	5.98011	4.77188
chr1:39610657:39611765	chr1	39610657	39611765	.	1109	0.65562	5.56244	1.10228e-07	9.52489e-06	53.8349	50.525	50.8499	30.5626	30.5367	37.5265
chr1:39758776:39759395	chr1	39758776	39759395	.	620	0.87539	3.3457	0.0003881	0.00545731	23.8149	18.1325	19.4698	8.55908	12.4385	12.5146
chr1:40071441:40072340	chr1	40071441	40072340	.	900	0.840901	3.87	5.14868e-05	0.00117005	18.1891	21.4136	21.6202	11.9827	12.6668	9.40495
chr1:40502379:40502605	chr1	40502379	40502605	.	227	0.990824	2.96543	0.000484757	0.00644052	45.2488	36.9471	49.2089	18.8526	14.7709	32.6273
chr1:40733289:40733852	chr1	40733289	40733852	.	564	0.941292	3.37319	0.000138561	0.00250479	17.6427	24.3624	28.4308	12.7476	12.7818	10.9433
chr1:42143865:42144564	chr1	42143865	42144564	.	700	1.15447	2.60184	0.000295209	0.00443037	8.48314	13.0011	12.6118	5.13545	4.55048	5.5422
chr1:43847297:43847834	chr1	43847297	43847834	.	538	2.01389	1.33825	0.000421723	0.00579503	4.77299	9.28718	5.69304	0.636363	2.18131	1.96665
chr1:44154056:44154806	chr1	44154056	44154806	.	751	1.29396	4.04618	1.12846e-09	2.34408e-07	31.2008	24.7116	35.9856	13.2204	14.5103	9.62723
chr1:44344838:44345668	chr1	44344838	44345668	.	831	1.26371	3.53298	4.2328e-07	2.80431e-05	16.223	20.8295	20.38	8.03379	4.64012	11.2469
chr1:44479384:44480212	chr1	44479384	44480212	.	829	1.86475	1.87912	3.30805e-05	0.000832774	5.03352	6.45766	7.60661	0.825967	2.42677	1.91446
chr1:44760277:44760604	chr1	44760277	44760604	.	328	2.76505	0.984523	0.000158456	0.0027664	10.2754	9.24876	6.59151	0	0	3.76341
chr1:44930046:44930711	chr1	44930046	44930711	.	666	1.30337	3.55416	8.00469e-08	7.41476e-06	22.411	26.5258	24.347	11.3093	10.5725	7.67859
chr1:45172549:45173957	chr1	45172549	45173957	.	1409	0.743295	4.97549	3.91805e-07	2.62388e-05	28.0206	30.1421	24.8067	17.3733	16.8958	15.2689
chr1:46378598:46379322	chr1	46378598	46379322	.	725	1.20449	3.91032	3.3257e-08	3.6859e-06	32.9838	28.3053	23.3597	12.0417	9.48086	15.3236
chr1:47022392:47022992	chr1	47022392	47022992	.	601	0.728263	3.96541	0.00029982	0.00447922	26.4371	29.9885	38.9714	15.6655	21.4792	20.2457
chr1:47150298:47151030	chr1	47150298	47151030	.	733	2.20772	2.02837	5.75995e-07	3.54916e-05	7.44437	11.1986	6.63647	2.10182	0.914867	2.40577
chr1:48792742:48793089	chr1	48792742	48793089	.	348	1.61023	1.95035	0.000178359	0.00303224	20.7533	10.7683	13.9785	4.91901	2.40876	7.60098
chr1:48794713:48796091	chr1	48794713	48796091	.	1379	0.753186	3.61523	0.000767842	0.00914085	12.3366	11.7757	8.36168	6.33086	6.68652	6.26599
chr1:48990381:48991332	chr1	48990381	48991332	.	952	0.925353	3.16906	0.000434746	0.0059317	14.161	9.93453	11.5444	4.85494	5.81138	8.15029
chr1:49318526:49319193	chr1	49318526	49319193	.	668	2.03059	2.37447	9.76427e-08	8.62987e-06	13.6947	10.1512	11.0582	3.8439	1.7568	2.90385
chr1:51536252:51536647	chr1	51536252	51536647	.	396	2.16819	1.44763	0.000105796	0.00203269	8.10565	15.7718	5.91461	1.29683	3.38686	1.78124
chr1:52033341:52033820	chr1	52033341	52033820	.	480	0.938843	3.1042	0.000432379	0.00590572	23.4051	23.4211	21.0196	9.62896	15.3679	10.2867
chr1:52087861:52088941	chr1	52087861	52088941	.	1081	0.791422	3.78377	0.000208117	0.0034067	15.4405	15.352	16.5001	6.96761	11.1663	9.13524
chr1:52108208:52108945	chr1	52108208	52108945	.	738	0.675319	4.04003	0.000505429	0.00665528	28.4884	22.0036	30.028	15.7728	19.3092	15.2926
chr1:52703990:52704580	chr1	52703990	52704580	.	591	2.3952	1.61834	5.31501e-06	0.000201947	7.60367	8.45432	7.31647	2.31718	1.13468	0.895141
chr1:53299033:53299614	chr1	53299033	53299614	.	582	1.02902	2.76288	0.000597355	0.00755873	12.1334	13.4908	19.1932	6.47078	6.91338	8.48384
chr1:55359988:55360265	chr1	55359988	55360265	.	278	3.02958	1.17822	8.32783e-06	0.000285749	15.5873	12.8379	8.42512	2.46304	0.603055	1.26865
chr1:56797604:56798287	chr1	56797604	56798287	.	684	1.51607	2.25688	4.8486e-05	0.00111537	11.9665	7.56572	9.21912	3.25345	4.16672	2.57811
chr1:57653645:57654596	chr1	57653645	57654596	.	952	1.06688	3.15992	5.84611e-05	0.00128633	13.4867	13.6834	9.4626	5.39438	6.51578	5.55702
chr1:57816244:57816817	chr1	57816244	57816817	.	574	0.719049	4.08709	0.000194657	0.00323403	42.7792	31.3991	33.8992	26.2439	19.8609	19.6619
chr1:59083697:59084505	chr1	59083697	59084505	.	809	1.18044	3.33324	4.86262e-06	0.000187323	12.8949	20.9548	16.4801	8.04067	5.59522	8.50107
chr1:59229794:59230512	chr1	59229794	59230512	.	719	1.16793	3.20218	1.97743e-05	0.000554545	15.6251	16.3804	19.2948	9.04715	3.49755	10.301
chr1:59392637:59393146	chr1	59392637	59393146	.	510	1.08754	2.94438	0.000134228	0.00244351	18.8814	22.3933	17.6635	7.71995	7.56066	12.4477
chr1:59639193:59639949	chr1	59639193	59639949	.	757	0.903228	4.30739	8.00911e-07	4.58854e-05	30.3175	35.8308	34.5104	20.3518	17.4958	15.8406
chr1:64197066:64197893	chr1	64197066	64197893	.	828	2.06342	2.51259	1.59968e-08	2.05529e-06	11.2422	7.54303	12.6205	2.27415	2.83465	2.34272
chr1:64211953:64212493	chr1	64211953	64212493	.	541	2.39383	1.33796	4.83145e-05	0.00111327	5.6365	5.27753	9.6578	1.26567	1.23955	1.30383
chr1:65346886:65347674	chr1	65346886	65347674	.	789	1.82545	1.56474	0.000309035	0.00458922	4.27165	4.74953	6.62214	1.30176	1.91235	1.11751
chr1:65398828:65399794	chr1	65398828	65399794	.	967	0.676447	4.09339	0.000396878	0.00554317	21.244	24.5433	18.0727	15.401	12.1359	12.4005
chr1:66436320:66437129	chr1	66436320	66437129	.	810	1.18118	3.29683	9.18846e-06	0.000306571	22.5877	12.5574	13.3458	8.03074	4.55344	8.92599
chr1:66602542:66603509	chr1	66602542	66603509	.	968	0.674494	4.94593	5.08317e-06	0.000194846	37.3044	39.45	39.4583	19.2756	25.286	28.2367
chr1:66682472:66683403	chr1	66682472	66683403	.	932	1.16183	4.97011	2.83898e-13	2.84209e-10	47.011	49.0154	41.949	21.4895	21.9455	18.1641
chr1:66696624:66697786	chr1	66696624	66697786	.	1163	0.603583	4.39172	0.00058486	0.00744407	19.3197	19.1796	25.8711	14.4246	16.8658	10.9172
chr1:67583604:67584155	chr1	67583604	67584155	.	552	1.52052	2.04042	0.000283496	0.00429734	7.26865	8.72837	14.6876	0.930335	4.8594	4.79192
chr1:68092028:68092897	chr1	68092028	68092897	.	870	0.618399	4.24162	0.000573628	0.00734693	22.6902	27.2798	27.75	16.3311	16.9576	17.2289
chr1:69421167:69421591	chr1	69421167	69421591	.	425	1.17373	2.47574	0.000533756	0.00693873	16.9933	23.0931	11.022	6.44448	9.86173	6.22386
chr1:72750338:72750877	chr1	72750338	72750877	.	540	1.80546	1.72559	0.00027224	0.00416494	5.64693	8.26142	12.0112	5.38905	1.55231	0.326561
chr1:76231424:76232254	chr1	76231424	76232254	.	831	1.37933	2.37418	0.000110506	0.00209994	5.21454	8.37475	11.9245	3.29591	3.22791	3.18308
chr1:76960548:76960868	chr1	76960548	76960868	.	321	1.90735	1.6867	7.87308e-05	0.00162715	10.9994	15.5654	16.2769	3.73293	3.13363	4.39483
chr1:78353982:78355964	chr1	78353982	78355964	.	1983	0.747026	3.92925	0.000292615	0.00440317	10.0358	7.55901	10.6302	4.05725	5.57986	7.20311
chr1:78536402:78536861	chr1	78536402	78536861	.	460	0.771101	4.58421	3.39022e-06	0.000141609	62.4522	66.3356	65.8005	31.6314	37.9033	44.469
chr1:80313474:80313805	chr1	80313474	80313805	.	332	1.5629	1.9518	0.000271344	0.00415581	17.8861	14.5122	15.1949	1.54682	8.58446	5.84268
chr1:80365564:80366034	chr1	80365564	80366034	.	471	1.78109	1.66028	0.000242014	0.00380912	7.83718	9.47169	10.7106	2.90754	1.42377	3.74401
chr1:85064768:85065664	chr1	85064768	85065664	.	897	2.60705	1.77509	2.9486e-07	2.10901e-05	4.11517	7.55961	6.22654	1.33587	0.9345	0.589775
chr1:85163811:85164799	chr1	85163811	85164799	.	989	0.657213	4.55772	5.7569e-05	0.00127318	28.5607	30.132	27.508	19.2125	18.9856	16.404
chr1:85839948:85840366	chr1	85839948	85840366	.	419	1.26984	2.61019	8.85397e-05	0.00177233	13.0232	22.1461	23.6497	7.76241	7.20212	9.25905
chr1:86083365:86083776	chr1	86083365	86083776	.	412	1.406	3.20412	4.26233e-07	2.81417e-05	36.2275	23.3886	34.1095	14.5421	13.8351	6.84826
chr1:86088651:86089419	chr1	86088651	86089419	.	769	0.929285	5.25129	5.61691e-11	2.1771e-08	64.2802	65.2061	63.7265	34.5034	38.5877	28.2057
chr1:86666777:86667838	chr1	86666777	86667838	.	1062	0.807778	4.20848	1.85277e-05	0.000525929	20.2504	19.8274	25.2778	12.5727	14.9969	9.63077
chr1:87311702:87312468	chr1	87311702	87312468	.	767	0.812479	4.59157	1.31373e-06	6.70198e-05	38.0828	33.5024	46.9799	22.0951	20.1092	25.2904
chr1:87744620:87745609	chr1	87744620	87745609	.	990	1.25606	2.67535	8.34929e-05	0.00170224	10.3752	9.37295	6.0056	2.93948	2.70948	5.1656
chr1:88433642:88434250	chr1	88433642	88434250	.	609	2.5095	1.20206	8.17779e-05	0.00167753	3.42593	7.61841	5.621	1.12435	0.275286	1.44781
chr1:89239126:89240446	chr1	89239126	89240446	.	1321	1.05615	3.48056	1.43596e-05	0.000431847	10.5699	10.5366	12.1385	6.47924	5.96481	3.47079
chr1:90417485:90417981	chr1	90417485	90417981	.	497	0.726686	5.05061	7.95561e-07	4.56543e-05	82.3449	75.759	88.8152	64.4084	43.1773	41.5133
chr1:90440548:90440930	chr1	90440548	90440930	.	383	0.938179	3.21412	0.000287451	0.00434744	28.4946	26.5573	37.1626	12.5146	16.6336	18.8774
chr1:92877182:92877463	chr1	92877182	92877463	.	282	1.42049	1.89962	0.000790992	0.00931574	17.6427	15.8197	19.1668	7.28432	4.16151	8.12928
chr1:93218247:93218751	chr1	93218247	93218751	.	505	1.35609	2.2451	0.000351845	0.00505764	11.1232	14.4877	12.1301	8.13536	1.65989	4.88871
chr1:93263439:93264048	chr1	93263439	93264048	.	610	1.18448	3.20951	1.08269e-05	0.000348024	14.2075	26.6207	20.3797	9.26064	7.14571	10.4071
chr1:94071200:94072370	chr1	94071200	94072370	.	1171	0.914033	3.81376	1.89693e-05	0.000535649	13.7055	15.2388	17.0783	8.77105	6.58571	9.03549
chr1:94724080:94724895	chr1	94724080	94724895	.	816	1.30082	4.07881	4.34865e-10	1.11744e-07	23.7984	32.8027	30.2488	11.1184	12.1217	11.8858
chr1:94790887:94792175	chr1	94790887	94792175	.	1289	0.946945	4.92864	9.43997e-10	2.05958e-07	30.1311	28.1029	34.1047	15.6706	14.1767	18.0584
chr1:95440301:95440849	chr1	95440301	95440849	.	549	1.52053	2.15819	0.000142978	0.00256314	14.6167	7.15087	11.4861	1.24722	5.80207	4.4969
chr1:96207892:96208860	chr1	96207892	96208860	.	969	2.33232	3.30704	6.03042e-14	7.74797e-11	14.7407	18.5997	16.1761	1.94324	2.42218	5.45953
chr1:96937947:96938710	chr1	96937947	96938710	.	764	1.09939	2.84348	0.000181327	0.00307044	11.1336	15.182	10.3762	4.70525	6.80253	5.53956
chr1:97025706:97026104	chr1	97025706	97026104	.	399	0.916651	4.15341	2.63556e-06	0.000116468	69.9889	43.3818	57.7982	29.6028	27.3113	34.0311
chr1:97658285:97659046	chr1	97658285	97659046	.	762	1.47989	2.47222	2.02769e-05	0.000566577	8.00353	9.83564	12.5314	4.94225	3.30018	2.54563
chr1:97849745:97850739	chr1	97849745	97850739	.	995	1.02217	3.32734	6.05413e-05	0.00132055	12.5813	15.7822	10.8644	5.67738	8.76158	4.78518
chr1:98781788:98782207	chr1	98781788	98782207	.	420	1.55494	1.86331	0.000340156	0.00492797	14.1386	11.0467	9.86634	4.48333	3.19332	4.19864
chr1:100023187:100023825	chr1	100023187	100023825	.	639	2.83796	2.04574	2.14349e-09	3.95312e-07	11.0511	8.65703	11.5601	1.60734	2.0989	0.551933
chr1:100151067:100151412	chr1	100151067	100151412	.	346	1.66577	2.54996	1.06708e-06	5.69495e-05	23.6563	25.2713	23.953	9.40014	5.81443	7.64492
chr1:100222105:100222614	chr1	100222105	100222614	.	510	2.6843	1.06802	0.000100823	0.00196249	5.03504	5.24843	7.77195	2.0139	0	0.69154
chr1:101062347:101063202	chr1	101062347	101063202	.	856	1.04395	3.27088	9.56793e-05	0.00188479	14.6243	8.13016	21.2581	6.99925	5.48386	8.85834
chr1:108190565:108191192	chr1	108190565	108191192	.	628	2.09526	2.05247	1.45742e-06	7.2901e-05	12.778	5.96716	10.615	2.45324	3.20349	1.1232
chr1:110262147:110262398	chr1	110262147	110262398	.	252	1.87949	1.40219	0.00058838	0.00748063	11.4637	18.4112	13.5841	2.03788	3.99165	5.59818
chr1:111734008:111734492	chr1	111734008	111734492	.	485	2.11424	1.41739	0.000173229	0.00295953	7.28004	6.99069	9.28701	1.05886	0.691338	3.63593
chr1:112080976:112081461	chr1	112080976	112081461	.	486	0.854005	4.41729	1.22141e-06	6.33344e-05	55.8089	59.8494	51.5295	33.4614	32.771	26.1248
chr1:112107535:112108131	chr1	112107535	112108131	.	597	0.922859	4.91511	1.54794e-09	3.01675e-07	68.0141	64.2647	63.9792	35.2686	33.6984	34.5596
chr1:112147495:112148354	chr1	112147495	112148354	.	860	0.924208	3.41401	0.000407465	0.00564863	12.3168	19.9196	15.0838	11.7439	2.92412	10.2525
chr1:112986576:112987164	chr1	112986576	112987164	.	589	2.54335	0.965176	0.000291724	0.00439613	3.81475	7.27117	3.05888	1.74379	0.284634	0.299393
chr1:113278267:113278912	chr1	113278267	113278912	.	646	0.794585	4.63121	2.94037e-06	0.000127263	40.7441	44.4735	59.1263	24.3788	36.0732	22.3841
chr1:113939101:113939688	chr1	113939101	113939688	.	588	0.973598	3.11209	0.000303787	0.00453166	16.6497	16.6914	22.9806	12.5184	9.12378	6.89776
chr1:114158607:114159152	chr1	114158607	114159152	.	546	1.25644	2.77823	3.58323e-05	0.00087784	16.7546	19.6095	14.1891	7.21095	5.5269	8.39727
chr1:117051275:117052461	chr1	117051275	117052461	.	1187	0.751077	4.88075	7.51848e-07	4.36512e-05	26.636	35.6292	30.2051	18.7478	17.0898	19.0159
chr1:117063747:117064097	chr1	117063747	117064097	.	351	1.78755	1.78131	0.000117363	0.0022019	17.3752	8.13432	15.399	3.90157	2.8658	5.02401
chr1:117619842:117620423	chr1	117619842	117620423	.	582	1.08678	3.82895	4.72022e-07	3.04075e-05	32.2638	30.0477	34.9811	15.2946	14.1148	16.3617
chr1:120529493:120530146	chr1	120529493	120530146	.	654	0.766582	3.69517	0.000404886	0.00562382	23.313	23.7383	25.8957	15.1812	12.5609	15.0997
chr1:120535833:120536572	chr1	120535833	120536572	.	740	0.811213	4.37111	4.16217e-06	0.000165961	35.3516	35.207	34.5728	18.9688	19.0305	21.9237
chr1:120561358:120562441	chr1	120561358	120562441	.	1084	1.42108	3.42865	2.71463e-08	3.1234e-06	15.6938	14.4864	11.8007	5.52708	5.56769	4.55498
chr1:120593108:120593799	chr1	120593108	120593799	.	692	1.2073	2.80619	5.94659e-05	0.00130232	15.0751	12.8935	12.2368	4.20533	5.57216	7.64492
chr1:120788410:120789507	chr1	120788410	120789507	.	1098	0.67362	3.94148	0.000771177	0.00916392	14.3244	18.5272	17.7214	11.0691	8.70311	11.8847
chr1:120791066:120791632	chr1	120791066	120791632	.	567	1.98086	2.07283	3.99667e-06	0.000161215	14.4358	4.72081	13.3458	3.32098	2.06975	2.79909
chr1:120816512:120817617	chr1	120816512	120817617	.	1106	0.915107	4.51843	1.51655e-07	1.22039e-05	26.8454	22.5882	30.6253	13.9298	12.1265	16.4225
chr1:143934479:143935502	chr1	143934479	143935502	.	1024	0.60614	4.38795	0.000473343	0.0063276	26.174	20.7374	25.864	17.0513	13.0976	17.7376
chr1:144007919:144008749	chr1	144007919	144008749	.	831	1.55819	2.15106	7.03216e-05	0.00148385	8.88402	6.44212	6.72107	2.67793	1.41221	3.39529
chr1:144010609:144011251	chr1	144010609	144011251	.	643	0.86351	3.31638	0.000569496	0.00729939	18.9695	24.4219	14.5703	10.3827	8.86482	12.6155
chr1:144691844:144692353	chr1	144691844	144692353	.	510	0.683923	4.92881	3.63456e-06	0.000149997	66.0849	77.3269	75.2466	39.9424	50.9523	44.9501
chr1:144891403:144892411	chr1	144891403	144892411	.	1009	0.736809	6.40609	3.8256e-12	2.60216e-09	92.8912	111.772	109.458	65.9957	61.477	60.8199
chr1:144908702:144909108	chr1	144908702	144909108	.	407	1.15386	3.3015	8.94737e-06	0.000299743	34.7009	39.0215	23.019	17.6649	12.3574	13.4315
chr1:145032225:145032977	chr1	145032225	145032977	.	753	0.76513	5.08973	1.84852e-07	1.41869e-05	59.0388	46.6852	63.4057	40.2379	32.5057	26.6973
chr1:145227616:145228310	chr1	145227616	145228310	.	695	1.39736	2.67905	1.3881e-05	0.000421211	12.4699	13.8649	11.6656	4.18718	3.13589	7.10446
chr1:145259337:145259927	chr1	145259337	145259927	.	591	1.55158	3.76901	5.33516e-11	2.09126e-08	33.6734	36.5348	30.4853	13.6134	9.6448	11.0401
chr1:145728452:145728763	chr1	145728452	145728763	.	312	2.25538	1.67321	1.2396e-05	0.000386186	12.8599	17.1583	15.5915	5.48659	0.537338	3.39121
chr1:146764124:146765205	chr1	146764124	146765205	.	1082	2.44007	3.6237	9.1945e-17	3.54397e-13	20.1727	16.4923	19.4821	1.42388	4.95821	3.91148
chr1:149981509:149982264	chr1	149981509	149982264	.	756	0.706934	3.84516	0.000796009	0.00935418	23.9889	26.2005	18.8271	17.888	9.97913	14.462
chr1:150737275:150737599	chr1	150737275	150737599	.	325	1.74299	2.07795	1.74658e-05	0.000502188	16.7899	19.7664	18.8483	5.79384	4.12675	6.51112
chr1:151035163:151035780	chr1	151035163	151035780	.	618	1.09189	3.07399	6.16437e-05	0.00133944	16.1011	17.6137	19.8243	6.92482	7.86704	10.2724
chr1:151515083:151515754	chr1	151515083	151515754	.	672	0.943475	3.61429	3.76146e-05	0.000912789	21.4944	25.2268	23.3253	10.9536	9.97913	15.4825
chr1:151859244:151859950	chr1	151859244	151859950	.	707	0.892828	3.74008	5.10445e-05	0.00116178	22.7004	23.2208	25.9931	9.20071	12.8049	16.7114
chr1:151952642:151954086	chr1	151952642	151954086	.	1445	0.714305	4.21358	9.36855e-05	0.00185077	16.4379	14.2016	16.3336	10.3064	9.04959	9.27477
chr1:153462529:153463449	chr1	153462529	153463449	.	921	0.662176	5.72915	1.90392e-08	2.35883e-06	74.4083	66.2636	69.6415	45.351	41.3207	46.3354
chr1:153479293:153479714	chr1	153479293	153479714	.	422	1.53591	2.16301	7.08258e-05	0.00149268	13.3109	13.5315	17.0775	6.08465	5.56183	3.34299
chr1:154749594:154750500	chr1	154749594	154750500	.	907	1.86648	3.25068	1.24752e-10	4.23918e-08	10.6169	18.2972	19.0696	4.34088	4.62099	4.08291
chr1:155425302:155426195	chr1	155425302	155426195	.	894	0.998163	3.27418	0.000107022	0.00205002	15.6183	12.5751	13.5025	6.51026	9.56389	4.73403
chr1:157074365:157074880	chr1	157074365	157074880	.	516	0.958429	3.68862	1.58874e-05	0.000468347	30.481	33.1994	32.8213	19.2413	14.9455	15.3787
chr1:159838820:159839587	chr1	159838820	159839587	.	768	1.13719	3.02879	6.97079e-05	0.00147486	13.5833	15.3353	13.1372	6.68678	3.05611	9.41413
chr1:161676012:161676674	chr1	161676012	161676674	.	663	2.39409	3.04519	4.01378e-13	3.86773e-10	22.0283	15.6107	22.555	5.16385	3.54011	2.65977
chr1:161986308:161987130	chr1	161986308	161987130	.	823	1.15436	2.70749	0.000166664	0.00287283	11.5055	9.97393	9.63231	4.99193	5.29634	3.64256
chr1:162289384:162290110	chr1	162289384	162290110	.	727	1.76335	1.52248	0.000563662	0.00724335	4.19442	6.1364	5.94777	1.41278	1.84483	1.45537
chr1:162742243:162742805	chr1	162742243	162742805	.	563	1.16874	2.69503	0.000168923	0.00290384	10.8325	16.1648	18.5608	7.60131	6.25335	6.2644
chr1:162826123:162826451	chr1	162826123	162826451	.	329	1.30681	2.43954	0.000137202	0.0024833	20.9761	28.2043	16.9763	7.80463	9.17231	9.64793
chr1:164704657:164705353	chr1	164704657	164705353	.	697	0.735562	4.28645	8.52023e-05	0.0017255	39.1443	30.2105	33.6038	27.0157	13.2291	21.7582
chr1:165451307:165452089	chr1	165451307	165452089	.	783	0.796607	3.50487	0.000865753	0.00998934	14.143	20.0553	19.5585	11.8056	12.8467	6.08078
chr1:168205928:168206879	chr1	168205928	168206879	.	952	1.06587	2.89223	0.000286288	0.00433209	10.4522	11.809	7.94859	7.1925	4.22645	2.96374
chr1:168678284:168679855	chr1	168678284	168679855	.	1572	1.02848	3.64845	7.52633e-06	0.00026493	10.6178	12.0327	8.5958	4.02908	5.01242	6.28193
chr1:170676846:170677680	chr1	170676846	170677680	.	835	0.737981	5.20578	6.87134e-08	6.59382e-06	57.2773	52.9997	53.9425	35.4664	30.719	32.3119
chr1:171757605:171758263	chr1	171757605	171758263	.	659	1.22959	2.44298	0.000302671	0.00451599	13.8817	8.12352	10.389	3.89639	4.83359	5.08424
chr1:171813440:171814007	chr1	171813440	171814007	.	568	0.765718	4.38004	1.31359e-05	0.000404514	43.7962	40.2133	52.3375	27.1238	25.9738	27.0102
chr1:171968627:171969482	chr1	171968627	171969482	.	856	1.21362	3.71125	1.18797e-07	1.01007e-05	20.4365	22.0974	19.9953	7.99914	7.63823	11.3304
chr1:172291588:172292127	chr1	172291588	172292127	.	540	0.931014	3.17082	0.000354429	0.00508484	21.9933	24.1233	17.0159	11.7291	9.62432	11.7562
chr1:172917536:172918122	chr1	172917536	172918122	.	587	1.26455	2.72181	4.51727e-05	0.00105631	16.1312	15.1999	13.8119	7.29053	4.28406	7.20992
chr1:173130760:173131425	chr1	173130760	173131425	.	666	1.69101	1.60048	0.000747155	0.00895991	8.43425	5.89463	4.05784	0.771088	3.27244	1.58867
chr1:173310186:173311099	chr1	173310186	173311099	.	914	0.887739	4.04451	8.35673e-06	0.000285942	18.2617	23.4284	27.3997	11.7992	12.106	13.3125
chr1:173976986:173977656	chr1	173976986	173977656	.	671	2.19245	1.46286	8.2988e-05	0.00169644	4.78366	7.7123	5.37013	1.7858	1.74895	0.262806
chr1:174020950:174022181	chr1	174020950	174022181	.	1232	1.04978	4.16751	1.54801e-07	1.23876e-05	18.1074	20.5677	19.3037	12.3662	9.52553	6.01168
chr1:174029130:174029651	chr1	174029130	174029651	.	522	0.847119	3.66125	0.000152759	0.00269063	28.9008	31.4504	30.7183	18.6922	19.9124	11.8237
chr1:175173454:175173697	chr1	175173454	175173697	.	244	2.34362	1.08583	0.000376495	0.00533195	12.4973	12.4328	11.8143	0	4.12253	2.89086
chr1:176816108:176816783	chr1	176816108	176816783	.	676	1.45096	3.59719	6.19014e-09	9.43894e-07	19.7054	22.4378	34.6477	7.59682	9.92008	10.4345
chr1:177279016:177280263	chr1	177279016	177280263	.	1248	0.793262	5.62077	3.68386e-10	9.7181e-08	50.2823	54.1917	44.4645	28.5303	24.8519	32.6404
chr1:177355166:177355794	chr1	177355166	177355794	.	629	1.02872	2.69022	0.000864062	0.00997647	14.0335	13.0501	12.0303	8.16446	3.73146	7.28921
chr1:178313379:178314536	chr1	178313379	178314536	.	1158	0.705474	4.64786	1.37319e-05	0.000418227	24.3925	25.4263	29.7168	15.226	19.3998	14.01
chr1:178505821:178506915	chr1	178505821	178506915	.	1095	1.65859	3.35593	7.49877e-10	1.69467e-07	14.5102	14.015	12.6693	5.1589	3.5214	4.34818
chr1:182248709:182249509	chr1	182248709	182249509	.	801	0.883837	4.41138	6.30027e-07	3.79109e-05	36.0656	29.8525	35.7637	16.0282	18.4184	20.6944
chr1:182959486:182959927	chr1	182959486	182959927	.	442	1.02629	3.14652	0.000153324	0.00269716	33.7686	21.3974	22.0115	9.68222	17.827	10.3731
chr1:183149548:183150642	chr1	183149548	183150642	.	1095	0.686825	4.7815	7.27841e-06	0.000257116	29.167	31.7782	30.9329	18.916	20.516	17.5538
chr1:183160838:183161452	chr1	183160838	183161452	.	615	0.752111	3.9676	0.000187789	0.00314857	31.8374	24.3732	37.4984	18.6491	16.356	20.645
chr1:183241334:183241963	chr1	183241334	183241963	.	630	1.43457	2.70161	1.09115e-05	0.000349834	10.9542	16.9949	15.157	7.60807	2.39499	5.87809
chr1:183436430:183437648	chr1	183436430	183437648	.	1219	1.56358	3.21566	1.74072e-08	2.19584e-06	11.4543	10.3935	11.085	2.80856	4.81356	3.47188
chr1:183498096:183498958	chr1	183498096	183498958	.	863	1.73883	2.51106	1.26672e-06	6.51e-05	7.25282	9.09809	12.5262	1.38849	2.71969	4.49541
chr1:184087081:184087621	chr1	184087081	184087621	.	541	1.16721	2.83234	8.56343e-05	0.00173158	15.7229	16.8221	19.6486	5.37909	9.91641	7.82297
chr1:184267763:184269230	chr1	184267763	184269230	.	1468	0.666196	4.74536	2.22889e-05	0.000608102	21.1001	21.0295	24.3006	13.8764	11.3061	16.6973
chr1:184357157:184358051	chr1	184357157	184358051	.	895	0.687727	4.2319	0.000143465	0.00256933	25.8221	23.527	26.9749	15.4924	16.2966	15.5654
chr1:184858919:184859424	chr1	184858919	184859424	.	506	1.04824	2.69995	0.000622629	0.00779185	13.9558	14.8118	20.6517	6.76607	7.2891	9.7581
chr1:185468896:185469798	chr1	185468896	185469798	.	903	0.64908	4.22321	0.000474355	0.00633386	20.9724	27.4685	26.1373	13.4595	20.6081	13.2794
chr1:190138307:190138914	chr1	190138307	190138914	.	608	1.70262	1.96289	5.45555e-05	0.00122257	10.0307	7.63094	9.1862	2.25239	3.03313	2.90037
chr1:192623604:192624410	chr1	192623604	192624410	.	807	1.32018	4.24477	2.47054e-11	1.19032e-08	34.2064	33.1685	31.4792	12.7273	13.5034	13.3295
chr1:192876695:192877318	chr1	192876695	192877318	.	624	1.25365	2.3197	0.000409161	0.00566505	10.0307	10.295	11.2605	3.84061	5.91072	3.39121
chr1:192937003:192937436	chr1	192937003	192937436	.	434	2.45848	1.66885	2.14008e-06	9.89859e-05	13.3127	8.63451	11.2086	2.36657	2.31773	1.21896
chr1:193180471:193181079	chr1	193180471	193181079	.	609	1.51892	2.15567	0.000162654	0.00282335	14.2308	10.2556	5.32516	4.77847	4.40458	1.15824
chr1:193624339:193624838	chr1	193624339	193624838	.	500	1.67134	1.75819	0.000464841	0.00624046	11.5554	7.49476	8.64806	1.36945	1.0059	6.34834
chr1:194412135:194412587	chr1	194412135	194412587	.	453	0.642584	4.24564	0.000612808	0.00771067	51.7258	35.453	63.2378	39.3	25.536	31.5315
chr1:197987473:197988245	chr1	197987473	197988245	.	773	2.75572	3.06701	9.44317e-15	1.55992e-11	14.9488	15.9286	23.7738	0.885804	3.03634	4.1063
chr1:198227621:198228081	chr1	198227621	198228081	.	461	1.40578	2.00451	0.000806196	0.00945473	12.533	14.3222	7.8164	1.11398	6.90963	4.97279
chr1:198682220:198682557	chr1	198682220	198682557	.	338	1.89959	3.34007	1.94612e-11	9.8556e-09	48.9073	37.4843	50.6389	14.1807	8.43207	14.0865
chr1:201106252:201107185	chr1	201106252	201107185	.	934	0.860193	3.89134	3.11111e-05	0.000795317	19.5889	18.9146	21.6047	9.1639	12.5647	11.3282
chr1:201279801:201281111	chr1	201279801	201281111	.	1311	1.51667	3.11235	1.1024e-07	9.52489e-06	8.69178	11.0253	8.52053	2.21975	3.45273	4.16981
chr1:201531272:201532568	chr1	201531272	201532568	.	1297	0.748293	5.63035	1.17149e-09	2.40104e-07	45.5366	47.0538	50.147	29.1682	29.6004	26.1047
chr1:201540271:201541427	chr1	201540271	201541427	.	1157	1.2765	2.3102	0.000318779	0.00469573	6.10341	5.86082	4.98304	2.21929	2.4633	2.28621
chr1:202425315:202426572	chr1	202425315	202426572	.	1258	1.63182	1.66932	0.000563412	0.00724149	3.95489	3.26254	3.00757	0.952521	1.33267	0.981239
chr1:202428605:202429858	chr1	202428605	202429858	.	1254	1.23122	4.1447	1.08392e-09	2.27198e-07	20.6054	20.9184	16.6663	7.23495	8.68996	8.85932
chr1:202933599:202934438	chr1	202933599	202934438	.	840	1.15839	3.92737	6.32862e-08	6.17153e-06	28.8503	21.881	22.521	11.0045	12.9729	8.81714
chr1:203371751:203372077	chr1	203371751	203372077	.	327	2.80514	0.829462	0.000221668	0.00357327	8.83441	8.18562	6.0607	0	2.56345	0.539274
chr1:203503500:203504066	chr1	203503500	203504066	.	567	1.42447	3.62725	3.93168e-09	6.51026e-07	32.2682	28.9543	31.4579	13.8877	11.8271	8.70828
chr1:203661583:203663109	chr1	203661583	203663109	.	1527	0.873039	5.17286	8.33375e-10	1.84826e-07	30.5849	29.0984	31.1489	14.3492	17.5664	17.6689
chr1:205116290:205116657	chr1	205116290	205116657	.	368	1.72879	3.28742	7.88478e-10	1.77038e-07	46.2286	42.672	28.8856	9.76851	10.4781	15.3342
chr1:206090539:206091027	chr1	206090539	206091027	.	489	2.2128	1.7182	9.43955e-06	0.000312987	13.4564	6.56859	9.57948	3.15058	2.05705	1.08186
chr1:206116245:206117177	chr1	206116245	206117177	.	933	0.77379	4.65837	1.64812e-06	8.07531e-05	32.1672	35.5746	33.4074	17.797	19.2267	22.1137
chr1:206879273:206880308	chr1	206879273	206880308	.	1036	1.23982	2.97497	1.30991e-05	0.000403917	10.5342	8.61229	11.4779	4.4613	3.72195	4.76602
chr1:210012965:210013808	chr1	210012965	210013808	.	844	1.56413	2.69434	1.24252e-06	6.40948e-05	12.3602	11.4172	8.75224	4.05644	3.97273	2.92512
chr1:210516229:210517091	chr1	210516229	210517091	.	863	1.93648	2.04216	5.26131e-06	0.000200126	9.67042	4.54904	6.47185	1.58685	1.55411	2.24771
chr1:210780593:210781062	chr1	210780593	210781062	.	470	1.72059	2.25833	6.60748e-06	0.000239218	16.3907	11.7699	15.3334	5.09903	5.35051	2.62638
chr1:210868411:210868751	chr1	210868411	210868751	.	341	1.55975	3.71327	9.16739e-11	3.2286e-08	48.477	63.8431	56.0053	16.064	20.6489	20.1682
chr1:211530230:211530851	chr1	211530230	211530851	.	622	2.03467	1.89318	8.33411e-06	0.000285823	5.16051	11.1888	10.1381	1.37606	2.15626	2.83509
chr1:212334435:212335104	chr1	212334435	212335104	.	670	1.14504	2.6617	0.000290224	0.00437829	14.8515	7.45747	14.521	5.1099	6.25557	5.26396
chr1:212655588:212656571	chr1	212655588	212656571	.	984	0.892178	3.9184	1.32788e-05	0.00040819	19.246	18.8602	20.5069	10.2639	11.9263	9.31893
chr1:212866149:212866784	chr1	212866149	212866784	.	636	1.75347	1.74847	0.00015317	0.00269514	6.30864	7.29499	8.49849	1.88407	2.636	1.94088
chr1:212885452:212886474	chr1	212885452	212886474	.	1023	0.827528	3.35984	0.000631901	0.00788371	12.8644	11.1638	13.2088	7.02798	7.37461	6.55037
chr1:214636944:214637614	chr1	214636944	214637614	.	671	1.03332	3.19316	0.000115453	0.00217608	18.1779	18.6159	16.1104	13.2659	6.9958	5.51892
chr1:214739636:214740392	chr1	214739636	214740392	.	757	1.18932	2.77634	9.82985e-05	0.00192328	13.7807	11.315	10.7101	3.84424	4.20784	7.68733
chr1:214743786:214744304	chr1	214743786	214744304	.	519	0.918937	3.11994	0.000525992	0.00685965	20.4094	23.3803	19.4401	8.57557	13.89	10.8728
chr1:217833365:217834455	chr1	217833365	217834455	.	1091	0.927214	4.34721	3.47454e-07	2.38252e-05	21.3303	28.4599	22.4591	12.8661	12.6006	12.4458
chr1:218594766:218595222	chr1	218594766	218595222	.	457	1.03732	2.87614	0.000369933	0.00526535	28.0948	16.7904	16.5581	11.2373	10.6386	8.10328
chr1:218640281:218640910	chr1	218640281	218640910	.	630	1.55889	2.49897	6.10352e-06	0.000223936	11.9732	13.0294	12.8691	4.34747	5.58831	2.79909
chr1:219361942:219363250	chr1	219361942	219363250	.	1309	0.87649	4.65692	1.17619e-07	1.00251e-05	27.3412	20.8574	25.6006	12.4234	15.1128	12.6633
chr1:220813734:220814248	chr1	220813734	220814248	.	515	0.767147	3.91717	0.000472485	0.0063235	24.9308	34.9963	48.9777	32.9068	14.9745	15.751
chr1:221997397:221997948	chr1	221997397	221997948	.	552	1.23182	2.52041	0.000227056	0.00363226	14.828	14.8705	11.4237	6.20223	3.34084	7.98654
chr1:222032076:222032562	chr1	222032076	222032562	.	487	1.35186	3.53937	5.14997e-08	5.24676e-06	27.6824	28.2143	44.3946	13.0056	13.4257	12.6735
chr1:222161024:222161876	chr1	222161024	222161876	.	853	0.903075	3.06852	0.000712181	0.00862775	10.7245	13.8071	12.4618	6.6225	6.87893	6.20197
chr1:222168289:222168707	chr1	222168289	222168707	.	419	2.14989	1.93022	2.0964e-06	9.77473e-05	16.0875	10.6472	13.7598	4.08548	1.60047	3.36693
chr1:222170234:222170752	chr1	222170234	222170752	.	519	1.57226	1.87456	0.000292146	0.00439869	11.4416	10.3148	6.94289	3.95796	2.58419	3.05797
chr1:222340474:222341362	chr1	222340474	222341362	.	889	1.14577	4.0939	2.68417e-08	3.09348e-06	18.2336	29.7076	30.1969	11.9384	11.6921	11.5049
chr1:224707450:224708072	chr1	224707450	224708072	.	623	1.3308	3.0382	3.02318e-06	0.000129935	17.5176	20.0502	16.7733	8.24309	4.5747	8.77468
chr1:227379462:227380261	chr1	227379462	227380261	.	800	0.677006	4.05944	0.000528484	0.00688697	24.0738	24.7595	26.5748	15.6203	11.3163	20.2794
chr1:227617189:227617975	chr1	227617189	227617975	.	787	1.06349	2.58543	0.000791386	0.00931835	8.565	11.5639	9.1572	5.00277	4.89954	4.03325
chr1:227993247:227993926	chr1	227993247	227993926	.	680	1.3165	4.73431	3.57453e-14	4.96002e-11	54.284	58.52	52.7256	20.6425	22.682	23.0802
chr1:229423070:229423486	chr1	229423070	229423486	.	417	1.93721	1.43454	0.000382353	0.00539601	5.38821	11.1262	10.8014	1.64203	3.61833	1.69154
chr1:232278063:232279071	chr1	232278063	232279071	.	1009	0.767645	4.55109	6.99649e-06	0.000249694	26.2449	29.3579	31.0696	12.3848	21.2677	17.1274
chr1:233004611:233005365	chr1	233004611	233005365	.	755	0.617236	4.63982	0.000117401	0.00220201	46.3407	34.0348	37.704	25.3938	23.9816	27.7944
chr1:234931643:234931956	chr1	234931643	234931956	.	314	1.96663	1.38653	0.000381489	0.00538947	9.20017	11.366	14.3446	1.63549	3.20349	3.93121
chr1:235409568:235410271	chr1	235409568	235410271	.	704	2.17948	1.88613	2.7993e-06	0.000122456	8.89088	5.06951	9.46906	1.45893	2.61952	1.00195
chr1:238096122:238096578	chr1	238096122	238096578	.	457	1.46945	3.5481	8.78295e-09	1.23859e-06	29.8508	31.6284	48.4916	10.8627	10.6386	18.1359
chr1:238282959:238283571	chr1	238282959	238283571	.	613	1.34579	3.3144	8.42205e-07	4.76998e-05	18.8506	15.7196	33.212	8.09831	12.3071	6.04111
chr1:238721326:238721918	chr1	238721326	238721918	.	593	0.727752	3.85674	0.000432682	0.00590795	26.7937	27.9857	34.636	20.7843	15.2666	17.8424
chr1:239155438:239155940	chr1	239155438	239155940	.	503	2.42523	1.02527	0.00028979	0.00437269	6.70045	5.32147	5.01462	1.70161	0.333299	1.05175
chr1:239721295:239721788	chr1	239721295	239721788	.	494	1.31061	3.07594	4.08306e-06	0.000163931	30.8638	15.894	22.9769	6.93043	10.5205	10.7091
chr1:239770091:239770990	chr1	239770091	239770990	.	900	1.59817	2.34971	1.06103e-05	0.000342872	9.62951	7.73269	6.40597	2.47262	2.4216	2.93905
chr1:239921007:239921552	chr1	239921007	239921552	.	546	1.2562	3.46921	7.58694e-07	4.39384e-05	26.1608	26.146	31.0179	10.9732	16.8878	6.78241
chr1:243277068:243277809	chr1	243277068	243277809	.	742	1.10853	2.64126	0.000435771	0.00594133	13.843	10.8222	7.77005	4.84476	4.29291	5.94147
chr1:243664157:243664673	chr1	243664157	243664673	.	517	0.909191	3.52091	0.000108671	0.00207645	23.903	31.7545	28.9245	13.5753	12.9709	18.4188
chr1:244920803:244921196	chr1	244920803	244921196	.	394	2.54072	1.4478	9.11439e-06	0.000304457	8.96147	12.6815	9.60286	1.30341	2.12753	1.79028
chr1:245505013:245505412	chr1	245505013	245505412	.	400	1.72894	1.736	0.00021483	0.00348571	10.432	14.2757	9.90924	3.85159	2.09562	4.40857
chr1:245638324:245639251	chr1	245638324	245639251	.	928	1.1782	2.63761	0.000370526	0.00527109	12.1061	7.49937	6.60098	2.58248	6.86495	2.09027
chr1:245878562:245879756	chr1	245878562	245879756	.	1195	0.901753	3.15017	0.00054025	0.00700744	8.19247	10.3036	9.4984	4.44069	5.4714	5.01728
chr1:245935012:245935694	chr1	245935012	245935694	.	683	0.929491	3.15526	0.000389432	0.00546939	18.5635	14.6311	16.0911	6.76706	10.0639	9.0366
chr1:245966253:245966842	chr1	245966253	245966842	.	590	1.73258	3.13221	5.40032e-09	8.47678e-07	15.2331	19.9618	31.1477	7.25346	5.11473	7.47215
chr1:249117590:249118218	chr1	249117590	249118218	.	629	1.3658	2.58072	3.12351e-05	0.000798193	10.4613	12.4828	16.0404	5.17083	4.26453	5.60708
chr10:4308745:4309620	chr10	4308745	4309620	.	876	1.1515	2.9521	5.22169e-05	0.00118392	13.1911	9.9816	11.7233	5.86238	4.01899	5.83783
chr10:4452531:4453037	chr10	4452531	4453037	.	507	1.44563	2.09985	0.000243183	0.00382325	7.59725	13.7267	13.1484	3.37636	4.96004	4.17379
chr10:4583349:4583961	chr10	4583349	4583961	.	613	1.42994	3.20638	1.52241e-07	1.22251e-05	22.7778	17.7573	22.9251	6.9813	9.02517	7.47946
chr10:4719664:4721268	chr10	4719664	4721268	.	1605	2.14921	1.79803	6.45935e-06	0.000234879	2.49987	3.89136	3.25537	0.426621	0.94009	0.769096
chr10:4746128:4746947	chr10	4746128	4746947	.	820	0.937677	3.32652	0.000163809	0.00283772	17.2235	12.6218	16.6985	7.09777	8.17802	9.03219
chr10:4762488:4763006	chr10	4762488	4763006	.	519	2.38231	0.98557	0.000425042	0.00583256	4.63849	7.22038	4.16573	0.989489	1.61512	0.339774
chr10:4806001:4806751	chr10	4806001	4806751	.	751	1.44397	3.34102	7.80506e-08	7.2799e-06	21.7978	15.6824	19.6721	4.55876	10.2688	6.10507
chr10:6116822:6117061	chr10	6116822	6117061	.	240	1.69183	1.70276	0.000406467	0.00563676	8.69331	22.3058	25.5238	4.9928	4.88977	7.34761
chr10:7080116:7080831	chr10	7080116	7080831	.	716	0.802542	3.55185	0.000579777	0.00740427	14.1215	21.4335	25.4148	9.8023	12.4098	12.5607
chr10:8434049:8434794	chr10	8434049	8434794	.	746	2.02674	3.43696	1.06894e-12	9.04424e-10	22.1591	19.1364	26.5663	7.80184	3.37097	5.43684
chr10:11260020:11260748	chr10	11260020	11260748	.	729	1.91948	2.57388	9.47098e-08	8.44597e-06	9.4666	10.2809	17.0529	4.46152	3.67955	1.45138
chr10:11581270:11582008	chr10	11581270	11582008	.	739	0.979183	3.07085	0.00033362	0.00486029	13.8992	16.1785	13.409	6.71755	10.2087	5.01109
chr10:13568709:13569521	chr10	13568709	13569521	.	813	0.771562	3.86807	0.000209474	0.00342363	20.1355	18.2178	28.1443	13.4755	12.1664	13.2311
chr10:13635519:13636217	chr10	13635519	13636217	.	699	1.70116	3.53035	5.55795e-11	2.16635e-08	25.945	28.337	19.3313	7.83664	7.19525	7.56836
chr10:13991577:13992373	chr10	13991577	13992373	.	797	3.322	2.17983	4.15586e-12	2.74603e-09	10.2699	9.17981	9.26837	0.85913	0.841402	1.10629
chr10:14188136:14188844	chr10	14188136	14188844	.	709	1.46764	2.15396	0.00013571	0.00246351	7.69636	10.8226	7.11524	3.38017	2.83751	2.98464
chr10:14647080:14647585	chr10	14647080	14647585	.	506	1.76282	1.58961	0.000373079	0.00529546	9.19815	8.11121	7.12126	2.70643	2.31926	2.09102
chr10:17116254:17116911	chr10	17116254	17116911	.	658	1.827	2.8606	8.78329e-09	1.23859e-06	15.8541	20.3397	13.143	4.94293	4.07658	4.82397
chr10:17117502:17118257	chr10	17117502	17118257	.	756	1.19193	3.22924	6.3805e-06	0.000232866	21.0168	15.1066	13.5841	7.47221	7.53979	6.76447
chr10:17155263:17155706	chr10	17155263	17155706	.	444	1.65633	1.89063	0.000246841	0.003865	19.5193	8.84195	5.68097	5.39762	3.77589	1.58867
chr10:17238060:17238451	chr10	17238060	17238451	.	392	1.58048	2.09126	8.69131e-05	0.00174885	20.8803	12.7462	11.0307	6.55032	3.42142	4.94839
chr10:17554107:17555094	chr10	17554107	17555094	.	988	2.13322	2.40484	2.11064e-08	2.5781e-06	6.01032	9.75315	8.93546	1.90587	1.69686	1.96333
chr10:17558498:17559010	chr10	17558498	17559010	.	513	2.77671	0.985499	9.69209e-05	0.00190234	5.63129	4.86989	6.32168	1.33475	0	1.03124
chr10:17694635:17695148	chr10	17694635	17695148	.	514	1.43401	2.268	9.82283e-05	0.00192308	14.3631	9.72083	14.0209	4.99557	3.58783	5.48927
chr10:18298860:18299754	chr10	18298860	18299754	.	895	0.725623	3.96812	0.000295283	0.00443052	24.2083	20.3369	19.3253	13.3885	15.3601	9.85155
chr10:18446541:18447379	chr10	18446541	18447379	.	839	1.80597	2.2856	2.72717e-06	0.000120058	8.9906	8.08221	8.16017	1.02015	2.79749	3.36291
chr10:21055867:21056171	chr10	21055867	21056171	.	305	1.947	1.37189	0.000499137	0.00659621	7.89304	11.1163	16.54	1.68375	2.74835	4.62538
chr10:24724337:24724782	chr10	24724337	24724782	.	446	2.0263	1.6455	4.49303e-05	0.00105206	9.35602	12.0031	8.88721	2.30289	2.63127	2.37232
chr10:24745302:24745614	chr10	24745302	24745614	.	313	1.6536	2.6803	4.99974e-07	3.1824e-05	25.6377	31.9265	31.0833	12.5788	6.42745	9.01433
chr10:25110825:25111590	chr10	25110825	25111590	.	766	1.09686	3.60948	2.82359e-06	0.000123363	17.1806	19.3356	27.0487	9.60941	9.41113	10.5898
chr10:27128963:27129810	chr10	27128963	27129810	.	848	1.60299	1.6455	0.000782334	0.00925304	4.54222	4.41908	5.94894	1.61492	1.977	1.24771
chr10:28620778:28621059	chr10	28620778	28621059	.	282	1.73101	2.88737	3.77638e-08	4.10024e-06	29.5942	37.9674	48.5559	15.7827	8.32302	10.6306
chr10:30471630:30472230	chr10	30471630	30472230	.	601	1.06853	3.60943	4.82242e-06	0.000185981	24.8348	22.5656	32.9758	11.3931	15.6212	11.1498
chr10:31102572:31103471	chr10	31102572	31103471	.	900	0.737133	4.37946	4.38067e-05	0.0010323	31.3851	20.8188	33.0308	13.8847	16.9512	20.3774
chr10:31108823:31109733	chr10	31108823	31109733	.	911	1.06071	3.29919	6.52623e-05	0.00140052	12.5081	14.691	15.2282	4.50972	11.4097	4.25855
chr10:31604343:31604731	chr10	31604343	31604731	.	389	2.7787	1.14333	3.32795e-05	0.000836268	8.66408	11.0096	5.55788	1.32017	0.430975	1.81329
chr10:32034508:32034970	chr10	32034508	32034970	.	463	1.25096	3.08564	5.66472e-06	0.000212075	26.6909	23.1248	24.5153	9.61279	9.05234	12.5687
chr10:33479349:33479719	chr10	33479349	33479719	.	371	2.39676	1.23419	0.000138079	0.00249672	8.65185	11.0627	7.77005	3.22984	1.80754	0
chr10:33640958:33641527	chr10	33640958	33641527	.	570	0.728323	4.02874	0.000187189	0.00314079	36.3218	37.8808	30.6602	18.9201	20.2944	24.1311
chr10:34744344:34744837	chr10	34744344	34744837	.	494	1.381	2.0312	0.000699058	0.00851786	15.9192	11.1981	5.47069	3.46521	4.41183	4.6406
chr10:45202094:45202665	chr10	45202094	45202665	.	572	1.36377	3.11149	8.74107e-07	4.86722e-05	20.4823	20.278	22.0485	9.27732	6.44805	8.63216
chr10:45251669:45252134	chr10	45251669	45252134	.	466	2.48565	1.30339	6.73458e-05	0.00143503	7.57687	7.27572	8.50578	3.30608	0	0.756836
chr10:50385264:50386092	chr10	50385264	50386092	.	829	1.08062	2.88493	0.000179987	0.00305243	9.67984	14.2068	10.8666	4.74931	5.86469	5.74337
chr10:51589156:51589656	chr10	51589156	51589656	.	501	1.42918	1.97757	0.000556218	0.00716362	7.68823	11.754	12.227	5.80856	3.34629	2.46387
chr10:52257537:52258073	chr10	52257537	52258073	.	537	1.69211	1.65813	0.000507228	0.00667263	8.06942	11.6306	4.36161	2.55019	1.56098	3.28385
chr10:54214748:54215423	chr10	54214748	54215423	.	676	1.13477	2.52588	0.000591613	0.00751348	13.0578	7.65525	12.26	6.33068	3.47203	5.21724
chr10:54246446:54247171	chr10	54246446	54247171	.	726	1.80788	1.9944	2.54994e-05	0.000679137	9.06359	5.89906	8.43762	3.30102	0.923688	2.42896
chr10:56905654:56906359	chr10	56905654	56906359	.	706	0.6975	5.44588	4.81477e-08	4.94887e-06	77.7453	71.0248	78.6002	43.644	51.2922	45.2097
chr10:57159714:57160181	chr10	57159714	57160181	.	468	1.93957	1.52104	0.000261006	0.00404301	8.57328	10.6763	6.54456	0.731545	1.79113	4.14481
chr10:57162602:57162817	chr10	57162602	57162817	.	216	2.38046	1.903	4.6247e-07	2.99219e-05	18.5754	23.132	38.3691	5.54755	6.20924	3.26561
chr10:57235879:57236397	chr10	57235879	57236397	.	519	1.05547	3.13779	7.35331e-05	0.00153759	22.8832	24.7556	18.3987	11.8739	10.6598	9.1739
chr10:59867172:59867732	chr10	59867172	59867732	.	561	1.6785	1.85426	0.000186012	0.00312558	9.15461	7.95217	9.63465	0.91541	2.9884	4.40071
chr10:61408426:61409067	chr10	61408426	61409067	.	642	1.01428	3.0129	0.000431642	0.0059007	15.9992	21.1245	11.2254	6.93259	4.43931	12.6351
chr10:61653954:61654653	chr10	61653954	61654653	.	700	0.638326	4.15088	0.000675924	0.00830304	27.5129	28.8064	34.7467	15.1618	20.8364	22.4207
chr10:61900011:61900608	chr10	61900011	61900608	.	598	1.38564	1.95235	0.000788718	0.00929211	9.12495	8.65376	7.83339	2.29005	4.4856	2.94888
chr10:62183549:62184378	chr10	62183549	62184378	.	830	0.794223	3.46743	0.000681967	0.00835362	14.6956	17.6297	16.9314	9.48717	9.4934	9.34829
chr10:62189845:62190293	chr10	62189845	62190293	.	449	1.85351	1.46032	0.000480761	0.00639846	9.65096	9.53835	6.01897	1.90625	2.2403	2.74922
chr10:62788584:62789405	chr10	62788584	62789405	.	822	1.25884	2.20629	0.00080171	0.00941225	7.41933	9.11771	5.47956	2.9155	4.48697	1.71623
chr10:63539399:63540394	chr10	63539399	63540394	.	996	0.609391	5.23507	8.39793e-06	0.00028646	47.5352	43.7158	44.4993	36.4362	22.8919	29.7446
chr10:63785985:63786613	chr10	63785985	63786613	.	629	1.42697	2.87041	2.86165e-06	0.000124634	16.8402	11.348	20.3369	7.34802	6.3968	4.20531
chr10:63831345:63832037	chr10	63831345	63832037	.	693	0.807357	3.72742	0.000207115	0.00339467	25.0117	21.1149	24.9583	17.0441	12.0959	11.4508
chr10:64112179:64112679	chr10	64112179	64112679	.	501	1.98796	2.02634	3.12761e-06	0.000133617	12.4934	12.1101	11.1481	2.05008	2.67704	4.22378
chr10:64181588:64182406	chr10	64181588	64182406	.	819	1.03604	4.32085	2.35594e-08	2.80369e-06	28.6103	33.9898	34.3177	16.93	15.1478	15.072
chr10:64378536:64379103	chr10	64378536	64379103	.	568	1.08537	3.52593	8.54679e-06	0.000290083	30.2335	17.2792	32.6713	15.0688	10.9208	11.7976
chr10:64590911:64591700	chr10	64590911	64591700	.	790	0.755749	3.89517	0.000214206	0.00348073	21.5343	21.007	26.9112	12.1344	15.0672	13.8396
chr10:64629806:64630110	chr10	64629806	64630110	.	305	2.34547	1.30456	8.13472e-05	0.00167127	9.99785	10.5313	14.7679	3.36751	1.09934	2.31269
chr10:64675771:64676623	chr10	64675771	64676623	.	853	1.53023	3.84509	2.42646e-11	1.17726e-08	25.4002	22.5935	25.346	8.62932	8.45126	8.2693
chr10:64721650:64722708	chr10	64721650	64722708	.	1059	0.979513	4.02121	1.78863e-06	8.6357e-05	17.7314	22.7481	19.3949	7.11236	12.5064	10.6572
chr10:64824066:64824927	chr10	64824066	64824927	.	862	0.914374	3.13287	0.000599689	0.0075781	14.1501	8.4876	15.6759	6.35477	6.80711	7.16009
chr10:64865465:64866497	chr10	64865465	64866497	.	1033	1.04579	4.14135	1.32114e-07	1.10169e-05	25.9459	19.5203	22.1504	9.61136	9.73762	13.486
chr10:64875494:64876064	chr10	64875494	64876064	.	571	0.672827	4.28483	0.000191846	0.00320112	47.5011	42.5022	33.4462	29.3797	23.4885	24.7065
chr10:64880211:64880946	chr10	64880211	64880946	.	736	0.641598	5.35711	6.60243e-07	3.93537e-05	63.6734	67.8873	70.5005	45.5864	42.8235	40.9709
chr10:65313741:65314810	chr10	65313741	65314810	.	1070	0.738664	4.19689	9.93981e-05	0.00193961	21.8989	23.3482	17.8484	16.4782	12.0645	9.22915
chr10:65677020:65677491	chr10	65677020	65677491	.	472	1.76133	2.32409	3.1769e-06	0.000135211	11.2208	18.1471	16.7953	6.16544	2.48633	4.8569
chr10:69366316:69366870	chr10	69366316	69366870	.	555	0.837302	3.48478	0.000382321	0.00539601	20.2422	25.079	30.1903	14.188	12.687	15.2513
chr10:69802698:69803063	chr10	69802698	69803063	.	366	2.11627	1.23569	0.000390229	0.00547833	7.45454	7.31338	12.3066	2.80626	1.83223	1.44543
chr10:72412919:72413503	chr10	72412919	72413503	.	585	1.10283	3.52651	6.34387e-06	0.000231774	27.9832	29.2835	20.9426	7.31545	14.329	14.7706
chr10:73922675:73923116	chr10	73922675	73923116	.	442	0.80031	3.69052	0.000249965	0.00390335	37.7628	32.7018	37.9086	18.5899	19.3442	24.3369
chr10:74572241:74573125	chr10	74572241	74573125	.	885	1.77345	2.60166	2.54566e-07	1.88386e-05	12.1502	10.2834	7.53245	3.67508	1.89434	3.18812
chr10:75128005:75128526	chr10	75128005	75128526	.	522	1.06093	3.18251	6.63121e-05	0.00141779	25.2114	17.7763	24.8508	12.7894	12.2044	7.43207
chr10:75199222:75199798	chr10	75199222	75199798	.	577	1.71676	2.3285	3.95838e-06	0.000160384	11.9604	14.5355	10.9287	5.34015	2.90554	3.0562
chr10:75318015:75318705	chr10	75318015	75318705	.	691	0.878373	3.17512	0.000703027	0.00855569	16.955	14.4617	17.4693	6.93645	10.6752	8.93198
chr10:75949589:75950138	chr10	75949589	75950138	.	550	2.40561	1.00799	0.000429	0.00587177	4.08525	5.84007	5.56883	0.933718	0	1.92374
chr10:76708749:76709909	chr10	76708749	76709909	.	1161	1.35974	2.3044	0.000151628	0.00267411	4.97649	6.45543	5.74179	2.06421	2.59922	1.97455
chr10:76954796:76955485	chr10	76954796	76955485	.	690	1.54601	3.18923	3.11722e-08	3.51092e-06	20.4685	15.7757	20.6279	6.9465	4.8594	7.66708
chr10:78633759:78634498	chr10	78633759	78634498	.	740	0.644895	4.05783	0.000759558	0.00906869	26.8932	26.2847	27.5121	16.4242	14.726	20.4939
chr10:78641418:78641933	chr10	78641418	78641933	.	516	2.54843	1.10744	0.000123629	0.00229301	4.97649	3.80409	9.42739	1.32699	0.324902	1.367
chr10:78783264:78783448	chr10	78783264	78783448	.	185	2.28789	1.04665	0.00047671	0.00635674	15.6154	11.5749	19.4776	5.55184	1.81243	1.90641
chr10:78847154:78847650	chr10	78847154	78847650	.	497	1.10852	2.50483	0.000808758	0.00947395	15.5002	14.7209	13.7754	4.13316	9.44504	6.74147
chr10:78920234:78920984	chr10	78920234	78920984	.	751	1.13529	5.07097	1.3763e-13	1.46904e-10	62.829	57.7397	62.1352	27.1246	29.6902	26.2988
chr10:80023307:80023670	chr10	80023307	80023670	.	364	1.39852	2.0053	0.00060469	0.00762789	16.7546	12.2559	14.849	5.17307	3.22403	8.23579
chr10:80095277:80096416	chr10	80095277	80096416	.	1140	1.06034	3.59777	6.37179e-06	0.000232671	12.5296	14.0879	15.3301	4.8051	6.47068	8.81714
chr10:80390774:80391520	chr10	80390774	80391520	.	747	0.948211	3.5961	3.25008e-05	0.000822059	19.7661	21.4996	20.9834	11.2288	9.20164	11.8034
chr10:81091116:81091942	chr10	81091116	81091942	.	827	0.915748	4.20853	1.27354e-06	6.53052e-05	26.975	29.1297	30.0643	15.9383	17.2312	12.3674
chr10:82265783:82266619	chr10	82265783	82266619	.	837	1.05259	3.03312	0.000162234	0.00281889	12.2718	9.16751	16.5746	4.70391	6.00894	7.58463
chr10:89691550:89692193	chr10	89691550	89692193	.	644	1.59034	2.43381	1.27004e-05	0.000393374	14.9527	12.192	8.11315	2.6581	6.76845	2.19059
chr10:89720856:89721697	chr10	89720856	89721697	.	842	2.44548	1.48771	1.55255e-05	0.000459146	6.86188	5.2983	2.56771	0.813214	0.597326	1.2566
chr10:89875679:89876614	chr10	89875679	89876614	.	936	1.46693	3.24588	2.38431e-07	1.78066e-05	15.2604	8.96046	18.8637	3.47484	8.06007	3.95641
chr10:89954143:89954613	chr10	89954143	89954613	.	471	1.47162	2.65923	8.21315e-06	0.000282793	25.556	16.2913	13.7708	3.99787	7.11887	8.98562
chr10:90410455:90411495	chr10	90410455	90411495	.	1041	0.854831	3.65222	0.00015934	0.00277833	19.888	12.8564	12.4612	7.0709	8.53546	9.48626
chr10:90467336:90468118	chr10	90467336	90468118	.	783	0.693839	4.10364	0.000257435	0.00399661	23.1617	27.1202	29.6828	14.6477	17.9854	16.6659
chr10:90753806:90754263	chr10	90753806	90754263	.	458	1.47293	2.01233	0.000345542	0.00498517	15.4184	7.79243	12.1948	5.23262	5.12465	2.31017
chr10:90975183:90975942	chr10	90975183	90975942	.	760	2.37753	1.76901	2.06522e-06	9.6553e-05	8.44694	4.46116	7.34896	2.25239	0.661774	0.92812
chr10:91312934:91313523	chr10	91312934	91313523	.	590	0.847807	3.33531	0.000742	0.00891274	16.5932	19.3569	28.094	12.4759	14.4917	8.36881
chr10:91982037:91982676	chr10	91982037	91982676	.	640	1.95445	2.27184	4.60721e-07	2.99016e-05	9.27843	12.8258	11.542	2.67471	2.61952	3.30643
chr10:91986786:91988137	chr10	91986786	91988137	.	1352	0.891352	5.41198	2.71342e-11	1.2694e-08	42.8532	41.18	37.7127	21.3977	21.5762	22.695
chr10:93108986:93109479	chr10	93108986	93109479	.	494	1.38487	2.79841	8.36641e-06	0.000285942	15.9192	22.3961	20.0592	11.0887	6.10868	4.99757
chr10:93193450:93194344	chr10	93193450	93194344	.	895	0.931247	4.10656	1.56229e-06	7.7312e-05	26.5394	22.9289	24.7605	12.8147	13.2996	12.807
chr10:93358267:93358846	chr10	93358267	93358846	.	580	1.51155	2.43423	1.98381e-05	0.000555884	9.68485	15.3833	13.9785	3.83683	6.64816	3.04039
chr10:93443510:93444397	chr10	93443510	93444397	.	888	1.53704	3.40874	4.82141e-09	7.67223e-07	19.8807	14.4686	17.2458	5.01207	7.36298	5.36177
chr10:93704744:93705023	chr10	93704744	93705023	.	280	1.69987	1.60541	0.000531888	0.00692222	14.3296	13.3835	16.7299	3.66818	3.59249	6.29795
chr10:95021833:95022576	chr10	95021833	95022576	.	744	0.714149	3.92595	0.000420053	0.00578125	24.1601	27.5825	22.7632	15.8757	17.8015	11.614
chr10:98750931:98751582	chr10	98750931	98751582	.	652	0.991468	2.92954	0.000412099	0.00569134	16.9846	14.2319	13.2639	8.139	7.4568	6.76161
chr10:99235682:99236203	chr10	99235682	99236203	.	522	1.14512	3.25668	1.74742e-05	0.00050222	20.2921	21.8785	31.0634	12.7894	6.42335	13.8507
chr10:99408589:99409340	chr10	99408589	99409340	.	752	1.56831	2.54109	3.8923e-06	0.000158572	12.1649	10.2037	10.3022	3.64216	2.67526	4.68997
chr10:100120717:100121716	chr10	100120717	100121716	.	1000	0.662713	4.57588	4.90908e-05	0.00112704	26.4811	30.3359	29.7277	20.5418	16.7649	17.2816
chr10:100133910:100134661	chr10	100133910	100134661	.	752	0.833955	3.66234	0.00018095	0.00306651	18.9944	22.3058	21.8022	11.1541	14.7139	9.37993
chr10:102288193:102288802	chr10	102288193	102288802	.	610	2.05734	1.6029	5.27397e-05	0.00119266	8.41924	5.26564	7.67929	1.96438	1.64901	1.44543
chr10:103639331:103640564	chr10	103639331	103640564	.	1234	1.03074	3.69891	4.75861e-06	0.000184031	15.2168	10.701	15.3303	6.51988	6.11363	7.57388
chr10:104529004:104529783	chr10	104529004	104529783	.	780	2.17447	1.19611	0.000474709	0.00633737	5.76124	2.74533	3.69575	0.658391	0.214935	1.80864
chr10:105531982:105532637	chr10	105531982	105532637	.	656	0.931559	3.0773	0.00082767	0.0096381	12.7219	14.6892	21.4224	8.61127	4.60014	12.3655
chr10:105583564:105583914	chr10	105583564	105583914	.	351	2.93408	1.53119	8.86403e-07	4.91766e-05	16.9179	12.2015	9.23938	2.92618	1.91053	0
chr10:105869505:105870247	chr10	105869505	105870247	.	743	1.08632	2.92046	0.000221032	0.0035655	9.50423	10.0872	20.3689	5.29903	7.67171	5.69613
chr10:106110905:106111406	chr10	106110905	106111406	.	502	0.973254	3.50601	4.38184e-05	0.0010323	29.4128	22.3947	35.5311	15.686	15.6963	12.9974
chr10:110965779:110966216	chr10	110965779	110966216	.	438	0.781647	4.06861	7.05102e-05	0.00148693	45.0696	48.0747	49.3611	35.1743	19.9036	27.78
chr10:111649530:111650156	chr10	111649530	111650156	.	627	0.784391	4.07829	6.49385e-05	0.00139747	36.8594	27.0374	36.206	18.5651	15.5082	24.1874
chr10:112723742:112724326	chr10	112723742	112724326	.	585	1.4011	2.32994	0.000102374	0.00198436	9.32773	13.7267	12.0112	4.97451	5.44502	2.71297
chr10:117873323:117874053	chr10	117873323	117874053	.	731	0.739306	5.74172	1.2909e-09	2.60356e-07	85.8445	84.219	103.024	46.3666	58.941	58.1376
chr10:118502179:118503156	chr10	118502179	118503156	.	978	1.30635	2.18084	0.000597834	0.00756341	6.23588	4.74398	7.36883	3.67568	1.37137	2.34402
chr10:121288427:121288639	chr10	121288427	121288639	.	213	1.85809	1.59171	0.000227626	0.00363803	18.8371	14.2422	26.2216	3.21468	6.29669	6.6232
chr10:122795813:122796597	chr10	122795813	122796597	.	785	1.17454	3.03394	2.86016e-05	0.00074349	12.8802	12.5026	16.2954	7.41423	4.05776	6.96385
chr10:122851814:122852440	chr10	122851814	122852440	.	627	1.25817	2.32755	0.000374459	0.00530745	11.0066	11.9534	8.62048	3.54922	4.27813	5.34372
chr10:123513673:123514378	chr10	123513673	123514378	.	706	1.84375	1.44803	0.000561162	0.00721524	4.54651	4.80239	6.63508	2.1822	0.949855	1.24889
chr10:124041858:124042243	chr10	124041858	124042243	.	386	1.11512	3.26129	1.38803e-05	0.000421211	31.5994	33.7477	33.1397	13.7477	16.07	15.5328
chr10:127702019:127702757	chr10	127702019	127702757	.	739	0.676133	4.87055	8.89946e-06	0.000298571	43.8692	51.4332	49.2475	23.1639	34.9364	32.2142
chr10:127779175:127779977	chr10	127779175	127779977	.	803	0.990879	4.00083	1.22463e-06	6.34068e-05	27.3815	23.1114	27.373	10.6589	12.5267	16.0312
chr10:127822568:127823380	chr10	127822568	127823380	.	813	2.10109	2.54198	7.03858e-09	1.03245e-06	11.2522	10.7551	10.8588	3.57944	1.8559	2.16904
chr10:128291288:128291759	chr10	128291288	128291759	.	472	2.16791	1.35602	0.000177046	0.00301361	4.42033	7.5613	11.4514	1.08802	2.84151	1.12082
chr10:128351550:128352971	chr10	128351550	128352971	.	1422	0.690208	4.5319	3.08257e-05	0.000790057	20.7669	17.9451	20.6522	11.7973	13.3223	11.657
chr10:128385318:128385659	chr10	128385318	128385659	.	342	1.6774	2.64065	5.45612e-07	3.41032e-05	22.9944	20.8709	35.2961	9.00956	8.82365	6.70309
chr10:128426582:128427134	chr10	128426582	128427134	.	553	1.24853	2.82875	3.30212e-05	0.000831584	18.8643	15.489	17.2675	8.97697	8.18541	4.46437
chr10:128555934:128556708	chr10	128555934	128556708	.	775	0.604288	5.71801	4.5257e-07	2.95809e-05	68.5455	96.0158	79.9713	58.0913	51.2683	51.1963
chr10:128839751:128840283	chr10	128839751	128840283	.	533	0.805435	3.56166	0.000425813	0.00583852	28.6055	26.4489	27.0421	17.9853	16.9851	11.9106
chr11:4065228:4065988	chr11	4065228	4065988	.	761	0.821725	4.16832	1.4639e-05	0.000439107	29.7363	31.4216	27.6999	14.1714	20.488	15.5256
chr11:4066204:4066574	chr11	4066204	4066574	.	371	0.913883	4.69852	7.0451e-08	6.70416e-06	112.907	72.6292	84.4993	42.4493	41.1215	60.3653
chr11:5301601:5302362	chr11	5301601	5302362	.	762	0.694375	4.2915	0.000101158	0.00196805	32.4354	28.1018	33.1017	17.5225	21.5612	18.7451
chr11:8033597:8034120	chr11	8033597	8034120	.	524	0.82169	3.92076	6.67208e-05	0.00142386	31.8533	40.1845	36.4462	26.1346	18.2367	16.8266
chr11:8799585:8800607	chr11	8799585	8800607	.	1023	2.04638	1.36723	0.000287919	0.00434957	3.92209	4.70973	1.93729	1.004	0.819401	0.689512
chr11:8828905:8829589	chr11	8828905	8829589	.	685	0.937521	3.46303	8.20349e-05	0.00168042	19.4465	21.8825	20.2525	12.2451	9.30026	10.5548
chr11:8926951:8927525	chr11	8926951	8927525	.	575	3.2208	1.31841	1.59586e-06	7.85812e-05	7.53614	4.96547	7.83339	0	1.74938	0.306683
chr11:9927028:9928374	chr11	9927028	9928374	.	1347	0.84984	3.53239	0.000245815	0.00385416	10.3658	9.27339	12.573	5.08334	6.47199	6.28393
chr11:10255104:10255540	chr11	10255104	10255540	.	437	1.09352	3.52233	1.05985e-05	0.000342872	22.77	37.5677	44.5266	15.2771	11.5091	22.1942
chr11:12197511:12197960	chr11	12197511	12197960	.	450	1.19969	2.41582	0.000652611	0.00807514	14.2659	17.8447	14.4134	10.2709	7.45108	2.35124
chr11:12208798:12209568	chr11	12208798	12209568	.	771	0.908028	4.2036	3.02457e-06	0.000129935	32.8894	29.1625	29.6775	16.6519	10.6548	21.7284
chr11:12228712:12229294	chr11	12228712	12229294	.	583	1.58219	2.04821	9.72347e-05	0.00190731	9.08444	8.57033	11.7434	2.34898	2.87563	4.53712
chr11:12306689:12307114	chr11	12306689	12307114	.	426	1.03691	3.44883	2.17534e-05	0.000596541	36.1672	37.7	26.2216	12.8587	17.7094	18.2138
chr11:13275362:13275839	chr11	13275362	13275839	.	478	1.17144	2.80048	8.53538e-05	0.001728	21.1527	15.6794	20.7306	8.59489	7.71608	9.22295
chr11:13337844:13338409	chr11	13337844	13338409	.	566	1.16343	3.09167	2.11839e-05	0.00058616	20.4159	20.493	19.0991	9.37567	6.51641	10.9046
chr11:13684920:13685837	chr11	13684920	13685837	.	918	0.766935	3.99036	0.000104504	0.0020129	19.5807	21.3825	23.1588	13.6125	10.9575	13.0624
chr11:15814656:15815130	chr11	15814656	15815130	.	475	1.5413	1.88979	0.000329183	0.00480714	8.44694	12.0217	11.379	3.96421	4.23535	2.59874
chr11:16205906:16206749	chr11	16205906	16206749	.	844	0.905929	3.68492	6.21461e-05	0.00134825	16.1633	25.583	16.4371	11.1552	8.1441	11.7005
chr11:16532642:16533646	chr11	16532642	16533646	.	1005	0.924302	3.68618	3.61342e-05	0.000884301	15.3306	14.0271	19.7199	6.98353	9.00803	9.82606
chr11:16809688:16810189	chr11	16809688	16810189	.	502	1.0958	3.57853	3.63643e-06	0.000149997	36.4463	24.5275	33.3777	12.617	13.6925	17.9153
chr11:18007164:18008609	chr11	18007164	18008609	.	1446	1.64845	3.18314	1.63448e-08	2.08074e-06	9.43417	10.4896	7.60045	2.60442	4.6376	1.46343
chr11:18138856:18139928	chr11	18138856	18139928	.	1073	0.89531	4.12688	3.94423e-06	0.000159936	21.9872	18.9589	21.3246	9.25306	10.6246	13.6407
chr11:18405057:18406315	chr11	18405057	18406315	.	1259	0.730344	4.33592	3.86047e-05	0.000930322	18.3565	17.7171	23.0397	11.965	12.2508	11.3453
chr11:19395749:19396383	chr11	19395749	19396383	.	635	1.10875	4.41807	1.33131e-09	2.67729e-07	45.241	44.6819	45.9641	24.262	20.3291	18.3285
chr11:19459446:19459738	chr11	19459446	19459738	.	293	1.17633	2.53347	0.000638368	0.00793728	31.222	20.7071	25.2112	16.3586	2.86091	15.0463
chr11:19940386:19941266	chr11	19940386	19941266	.	881	0.98108	3.06511	0.000389793	0.00547335	14.0271	9.7224	12.4747	7.96645	3.4253	7.00567
chr11:27239490:27240518	chr11	27239490	27240518	.	1029	0.956367	5.00134	6.96153e-10	1.59931e-07	40.084	37.2848	44.648	26.6172	19.7139	16.4518
chr11:27489739:27490774	chr11	27489739	27490774	.	1036	0.683753	4.61459	2.18621e-05	0.000598948	26.9552	30.6597	28.6947	16.8538	19.0952	17.7024
chr11:32102508:32103104	chr11	32102508	32103104	.	597	1.17309	2.81982	9.84453e-05	0.00192507	15.0545	20.3256	11.468	4.87452	7.58213	8.27068
chr11:33711796:33712871	chr11	33711796	33712871	.	1076	1.57776	4.42165	2.91664e-15	6.32363e-12	28.0413	28.3591	31.814	11.6136	9.66009	8.19437
chr11:33744015:33744519	chr11	33744015	33744519	.	505	0.805875	3.65997	0.000341416	0.00494107	25.4244	33.9225	33.893	15.2538	14.2751	23.7452
chr11:35057239:35057868	chr11	35057239	35057868	.	630	1.30851	3.61867	5.78028e-08	5.72908e-06	30.8246	22.3766	27.7401	14.401	9.84607	8.39727
chr11:35281831:35282509	chr11	35281831	35282509	.	679	0.835278	3.61945	0.000270386	0.00414755	21.2728	21.0246	25.4729	17.8997	10.1232	9.86896
chr11:35343233:35344073	chr11	35343233	35344073	.	841	1.06745	3.51497	1.06075e-05	0.000342872	23.2818	13.5798	16.4958	10.1773	7.17643	8.17761
chr11:35662922:35663633	chr11	35662922	35663633	.	712	1.65824	1.78563	0.000252858	0.00394018	5.40984	6.51631	8.09744	2.64466	1.8837	1.73371
chr11:35736294:35737085	chr11	35736294	35737085	.	792	0.997011	3.85594	3.07256e-06	0.00013167	27.5592	22.9818	20.7011	14.049	11.854	9.79682
chr11:36207828:36208474	chr11	36207828	36208474	.	647	1.11809	2.48728	0.000759202	0.0090674	8.68194	12.1355	12.8095	6.61444	4.14589	4.63343
chr11:36491152:36491956	chr11	36491152	36491956	.	805	0.890003	3.64236	0.000118898	0.00222229	15.152	20.1722	23.724	14.2474	10.413	7.0099
chr11:37807635:37808418	chr11	37807635	37808418	.	784	1.01602	2.84924	0.000594064	0.00753032	12.0778	12.9738	10.1115	4.36688	4.06293	8.99708
chr11:37809648:37810551	chr11	37809648	37810551	.	904	1.03365	3.74739	3.82091e-06	0.000156398	14.3804	20.5293	23.7168	8.71057	9.27264	10.5337
chr11:42543448:42543884	chr11	42543448	42543884	.	437	0.912948	4.21609	1.69758e-06	8.27676e-05	41.5002	64.5184	58.132	28.9873	27.6219	30.2648
chr11:45879081:45880279	chr11	45879081	45880279	.	1199	1.18048	4.15711	1.15271e-08	1.54541e-06	17.9365	17.2642	25.6953	11.9927	6.29209	8.53034
chr11:46585910:46586685	chr11	46585910	46586685	.	776	0.79839	3.5962	0.000427659	0.0058592	17.5796	16.5569	23.6819	12.3533	11.0182	9.77157
chr11:46732397:46732869	chr11	46732397	46732869	.	473	1.51794	2.18755	0.000114194	0.00215645	14.5902	13.9588	11.0462	7.96193	4.25326	1.49127
chr11:47072332:47073193	chr11	47072332	47073193	.	862	1.36917	2.19431	0.000291577	0.00439488	9.68164	5.79641	5.64331	2.18445	2.72284	3.27318
chr11:47077826:47078411	chr11	47077826	47078411	.	586	1.51053	2.75669	1.72243e-06	8.37439e-05	19.1714	16.7484	12.6056	4.38178	5.72182	6.9213
chr11:47152042:47152697	chr11	47152042	47152697	.	656	1.91843	2.57964	5.24972e-08	5.30941e-06	12.4773	10.6089	17.852	3.91421	2.55563	4.30104
chr11:48128735:48129232	chr11	48128735	48129232	.	498	0.966866	3.16525	0.000227517	0.00363713	19.6586	20.7829	28.5809	11.6871	11.1093	12.3936
chr11:57023138:57023321	chr11	57023138	57023321	.	184	2.28942	1.44933	4.63577e-05	0.00107745	15.7003	21.336	28.396	7.44268	2.73341	2.87515
chr11:58383741:58384378	chr11	58383741	58384378	.	638	1.43793	2.36619	6.65155e-05	0.00142083	13.5839	11.4676	7.90706	3.21972	2.89051	6.08078
chr11:59473904:59474723	chr11	59473904	59474723	.	820	2.32376	2.22631	2.33916e-08	2.79812e-06	8.80748	6.0933	11.645	1.46131	1.6356	2.15052
chr11:61587595:61588672	chr11	61587595	61588672	.	1078	2.35163	1.40363	4.31369e-05	0.00101901	2.38207	4.13837	4.34542	0.317591	0.777594	0.981499
chr11:61601961:61602356	chr11	61601961	61602356	.	396	1.49394	2.98094	3.59499e-07	2.45255e-05	34.8543	23.4324	25.9333	9.94236	11.0073	8.9062
chr11:64426766:64427816	chr11	64426766	64427816	.	1051	0.993233	3.70563	1.12703e-05	0.000358684	15.5758	17.6579	15.0854	7.32937	5.90202	11.0739
chr11:64774127:64774883	chr11	64774127	64774883	.	757	1.03338	3.37148	3.92227e-05	0.000941291	14.4167	19.3297	19.7542	10.4021	9.74448	5.82374
chr11:65246736:65247500	chr11	65246736	65247500	.	765	0.7665	4.66966	1.87512e-06	8.94744e-05	38.3922	43.387	42.3925	27.0758	23.8873	21.8988
chr11:65273891:65275610	chr11	65273891	65275610	.	1720	0.756011	4.03001	0.00011329	0.00214345	12.5034	9.95981	12.5699	7.86241	6.82294	6.04897
chr11:68349640:68351227	chr11	68349640	68351227	.	1588	0.979992	2.85556	0.000792894	0.00933022	7.17564	4.27013	5.78625	2.15594	3.80062	2.77618
chr11:73999055:73999599	chr11	73999055	73999599	.	545	1.22022	2.8508	3.48785e-05	0.000861857	20.9081	16.0438	15.868	7.53827	8.30557	6.79486
chr11:74041453:74042008	chr11	74041453	74042008	.	556	1.64169	2.67158	7.75821e-07	4.47064e-05	16.1646	17.0102	16.2022	8.31277	3.61833	3.80596
chr11:74465708:74466573	chr11	74465708	74466573	.	866	0.636518	4.74765	3.28447e-05	0.000828642	38.9183	35.442	37.4483	24.9063	24.0052	23.0101
chr11:75036861:75037816	chr11	75036861	75037816	.	956	0.835092	4.02018	2.80648e-05	0.00073177	21.1527	22.9591	19.7883	10.0274	10.6973	15.1256
chr11:76731033:76731792	chr11	76731033	76731792	.	760	1.28545	2.57461	8.32772e-05	0.00170085	12.0369	8.45273	10.9049	4.95526	4.85301	3.01639
chr11:77670129:77671170	chr11	77670129	77671170	.	1042	0.765987	3.85089	0.000337838	0.00490667	18.4827	11.1315	21.4403	9.52834	8.68816	11.8464
chr11:78050403:78051460	chr11	78050403	78051460	.	1058	0.859588	3.44723	0.000333663	0.00486029	13.0456	11.1318	14.4747	8.57526	5.3876	7.33372
chr11:82691038:82691857	chr11	82691038	82691857	.	820	1.91431	2.76065	8.30826e-09	1.18606e-06	11.7433	13.0571	12.5239	4.80143	2.45341	2.58063
chr11:82700156:82700781	chr11	82700156	82700781	.	626	1.12634	3.97791	7.02632e-08	6.69624e-06	38.4565	28.7909	33.9614	14.7665	13.9261	17.747
chr11:82706786:82707416	chr11	82706786	82707416	.	631	0.698036	3.94506	0.000463754	0.00623189	28.9954	30.2596	29.4094	18.99	20.7237	14.8117
chr11:82744984:82746111	chr11	82744984	82746111	.	1128	1.08995	2.60425	0.000518546	0.00677783	7.114	6.80249	6.86811	3.33865	3.26976	3.12664
chr11:82762878:82763587	chr11	82762878	82763587	.	710	1.16244	3.4223	2.90948e-06	0.000126084	18.0836	17.5933	25.122	9.40293	9.20891	8.44458
chr11:82983320:82984443	chr11	82983320	82984443	.	1124	0.769828	3.55015	0.000831557	0.00967362	12.1368	10.0019	16.1895	7.31025	8.20348	6.9031
chr11:86270471:86270897	chr11	86270471	86270897	.	427	1.79779	1.9365	5.25855e-05	0.00119034	9.02062	15.4626	13.924	1.60357	2.35573	7.02067
chr11:86350064:86350685	chr11	86350064	86350685	.	622	1.60274	1.69987	0.000704915	0.00857129	5.41853	6.8854	8.97943	1.10085	2.15626	3.68562
chr11:91856516:91857356	chr11	91856516	91857356	.	841	0.899822	3.17614	0.000516269	0.00675698	13.5492	11.0336	15.8531	6.71699	7.57512	7.33888
chr11:92045455:92045884	chr11	92045455	92045884	.	430	1.14657	3.32503	6.87339e-06	0.000246702	36.9504	26.9745	28.9107	14.7296	11.6965	15.5838
chr11:92329708:92330416	chr11	92329708	92330416	.	709	1.01438	2.7866	0.000653389	0.00808059	9.50727	14.0945	13.7222	5.3117	7.80314	5.22313
chr11:93867986:93869767	chr11	93867986	93869767	.	1782	0.663361	4.59907	6.27983e-05	0.00136027	15.761	16.9234	16.6822	11.4313	12.3244	7.32287
chr11:94439368:94440034	chr11	94439368	94440034	.	667	0.84043	4.55842	9.33915e-07	5.11809e-05	37.7769	41.2006	55.374	23.098	28.4024	23.2656
chr11:94852435:94853179	chr11	94852435	94853179	.	745	1.4296	2.41001	4.16107e-05	0.000990415	8.40158	9.58102	11.3663	3.21684	4.27562	3.31382
chr11:95245356:95246126	chr11	95245356	95246126	.	771	0.895012	3.06541	0.000852919	0.00987246	11.0325	14.8127	14.9556	7.10481	6.30588	8.46262
chr11:95310793:95311213	chr11	95310793	95311213	.	421	1.6871	1.99448	5.281e-05	0.00119386	14.105	14.8352	10.6988	4.87928	4.38039	2.93206
chr11:95899379:95899924	chr11	95899379	95899924	.	546	1.8484	1.97239	1.5835e-05	0.000467306	12.0516	9.80476	8.90941	3.44871	3.0705	1.93783
chr11:96035993:96037023	chr11	96035993	96037023	.	1031	0.707779	3.81256	0.000787458	0.00928358	16.8119	18.6928	13.9801	12.7847	9.10608	8.38098
chr11:101733964:101734553	chr11	101733964	101734553	.	590	1.20392	3.42315	2.37149e-06	0.000107188	24.2098	26.0109	23.5134	15.0872	10.7978	5.97772
chr11:102009445:102010094	chr11	102009445	102010094	.	650	1.62259	2.54505	1.8816e-06	8.97218e-05	10.3702	14.5503	13.5819	3.68699	4.6426	4.06945
chr11:102067324:102068107	chr11	102067324	102068107	.	784	0.955543	3.38322	0.000128455	0.00235586	18.0144	15.9327	17.0057	5.24025	11.5473	9.44693
chr11:102163476:102163996	chr11	102163476	102163996	.	521	0.769603	3.71438	0.000406126	0.00563489	24.9517	32.1957	35.9644	18.071	16.0892	20.3082
chr11:102176271:102178104	chr11	102176271	102178104	.	1834	1.70617	2.42577	2.31815e-06	0.000105534	3.8504	4.86496	3.92951	1.02672	0.914119	1.92304
chr11:102268066:102268302	chr11	102268066	102268302	.	237	2.43112	1.02517	0.000270049	0.00414422	13.5436	13.5529	9.12243	1.44457	3.53691	1.48812
chr11:102423162:102423740	chr11	102423162	102423740	.	579	1.95662	2.05344	3.63989e-06	0.000150051	13.305	6.78035	11.2022	2.3652	2.8955	2.74108
chr11:102434647:102435393	chr11	102434647	102435393	.	747	1.21616	2.47702	0.000315834	0.00465927	8.80879	11.9442	8.68279	3.8957	5.83519	2.83282
chr11:102630853:102631859	chr11	102630853	102631859	.	1007	0.871077	3.89051	2.41328e-05	0.000651151	21.197	17.7206	16.8181	10.5395	10.322	9.63143
chr11:102633008:102633463	chr11	102633008	102633463	.	456	1.00462	3.92022	1.20451e-06	6.26454e-05	45.4023	42.655	41.8812	21.0223	22.4268	21.2694
chr11:102721879:102722668	chr11	102721879	102722668	.	790	0.798783	4.79861	4.62759e-07	2.99219e-05	38.5993	51.9528	42.1912	24.0521	22.0703	30.1345
chr11:104124743:104125277	chr11	104124743	104125277	.	535	1.26408	2.95251	1.24676e-05	0.000388242	14.9992	20.6798	23.2366	9.91893	7.20736	7.25148
chr11:104495943:104496359	chr11	104495943	104496359	.	417	1.5784	2.04187	0.000119653	0.00223159	8.46719	14.9775	17.7144	4.51558	3.21629	5.92038
chr11:104643573:104644186	chr11	104643573	104644186	.	614	3.03117	1.60377	3.04348e-07	2.15686e-05	8.10301	11.0439	4.4015	0	1.91131	0.861609
chr11:104787130:104787497	chr11	104787130	104787497	.	368	1.85447	1.76255	9.24288e-05	0.00183063	9.59462	8.24346	21.5418	4.18651	3.64455	2.87515
chr11:106192791:106193279	chr11	106192791	106193279	.	489	1.1009	2.95274	0.000103272	0.00199612	22.6461	18.2461	21.0012	7.35136	9.25671	12.261
chr11:106239508:106240023	chr11	106239508	106240023	.	516	0.659624	4.20287	0.00036788	0.00524204	38.2568	49.1074	41.5504	33.1747	25.6672	22.5555
chr11:109870491:109871098	chr11	109870491	109871098	.	608	1.66301	2.7174	4.10154e-07	2.73095e-05	15.574	13.5009	17.7797	5.06788	2.75739	6.9609
chr11:110219870:110220955	chr11	110219870	110220955	.	1086	0.798419	5.3125	3.43506e-09	5.827e-07	45.6648	50.4448	42.1387	27.4269	27.3241	24.6815
chr11:111401846:111403066	chr11	111401846	111403066	.	1221	0.801314	4.36893	7.45505e-06	0.000262687	17.4819	20.4607	25.675	12.1972	12.7694	11.4096
chr11:111927623:111928244	chr11	111927623	111928244	.	622	2.13409	2.02108	1.17516e-06	6.16502e-05	6.45064	8.31986	14.7726	2.20169	2.42579	1.98456
chr11:112452234:112453167	chr11	112452234	112453167	.	934	1.12377	3.51848	3.26721e-06	0.000137548	15.9804	14.9024	18.1325	5.49834	7.53884	9.44019
chr11:112919875:112920286	chr11	112919875	112920286	.	412	2.0267	1.26913	0.000523652	0.00683813	8.18041	8.22933	7.87142	0.830979	2.03458	2.99611
chr11:113182403:113182610	chr11	113182403	113182610	.	208	1.38334	2.13278	0.000319765	0.00470326	30.8638	27.4533	25.9858	13.9908	9.67208	8.47802
chr11:113243902:113244580	chr11	113243902	113244580	.	679	1.40297	3.56228	1.07297e-08	1.46541e-06	25.7638	21.0246	26.7997	9.83223	10.1232	7.79128
chr11:113390168:113391394	chr11	113390168	113391394	.	1227	0.967565	3.66552	1.69037e-05	0.000490244	10.8564	13.8162	15.4178	6.69659	6.96831	6.75477
chr11:113489065:113489704	chr11	113489065	113489704	.	640	1.38094	3.6606	9.03132e-09	1.26841e-06	30.5938	21.4694	31.2479	10.9663	8.38247	12.6746
chr11:115071862:115072453	chr11	115071862	115072453	.	592	0.760738	3.78487	0.0003501	0.00503731	28.7367	25.6216	31.3468	14.7471	14.726	21.1492
chr11:116732270:116733453	chr11	116732270	116733453	.	1184	0.854436	3.8721	4.44289e-05	0.00104359	13.0128	14.7701	19.0211	9.6868	8.21255	7.89372
chr11:116856939:116857900	chr11	116856939	116857900	.	962	1.12466	3.38245	8.20633e-06	0.000282699	15.1817	14.4686	13.4845	7.47362	8.0165	4.21609
chr11:116910543:116910928	chr11	116910543	116910928	.	386	1.27094	3.22347	1.85894e-06	8.90084e-05	29.9363	33.7477	35.4735	10.1999	14.3327	16.4465
chr11:119341077:119341736	chr11	119341077	119341736	.	660	1.57808	2.51235	7.59929e-06	0.000266282	12.1585	15.1409	9.28138	5.70605	4.82627	1.60312
chr11:119380185:119381299	chr11	119380185	119381299	.	1115	1.81872	1.68577	0.00016461	0.0028452	3.59847	3.04079	5.49391	0.76763	1.05251	1.58155
chr11:120051374:120051868	chr11	120051374	120051868	.	495	1.84212	1.44752	0.000615721	0.0077361	6.48452	11.8964	4.36771	2.07493	2.03211	2.13749
chr11:120177057:120177797	chr11	120177057	120177797	.	741	0.791061	3.65759	0.000437606	0.00595996	25.3408	19.7471	17.7493	15.94	9.27615	11.185
chr11:121405797:121406406	chr11	121405797	121406406	.	610	1.95712	2.35358	2.19438e-07	1.65665e-05	11.5765	11.7014	14.1772	3.92876	3.29802	2.31269
chr11:121514043:121514973	chr11	121514043	121514973	.	931	1.76246	1.85616	7.59336e-05	0.00157779	4.30966	5.36681	6.77323	1.65482	1.98082	1.13647
chr11:121562794:121563338	chr11	121562794	121563338	.	545	1.21232	2.40501	0.000467545	0.00626705	15.313	15.0615	7.60342	5.02551	5.84466	5.5006
chr11:122007642:122008317	chr11	122007642	122008317	.	676	0.950324	4.48783	1.67789e-07	1.32042e-05	45.8209	31.149	52.2381	26.0824	17.1121	23.7384
chr11:122592189:122592822	chr11	122592189	122592822	.	634	1.64895	2.31091	1.13587e-05	0.000360506	10.8851	9.85115	12.5038	2.43002	5.81749	2.22514
chr11:122594369:122594863	chr11	122594369	122594863	.	495	1.29837	2.71666	5.41412e-05	0.00121603	10.6995	14.7804	28.7541	8.29971	6.77371	6.76871
chr11:124906649:124907323	chr11	124906649	124907323	.	675	1.2458	2.56967	0.000183502	0.00309615	11.175	16.655	7.20672	4.31124	6.70597	3.65748
chr11:125145897:125146408	chr11	125145897	125146408	.	512	2.40095	1.79074	1.23334e-06	6.37623e-05	14.7326	6.97057	8.79726	1.33736	1.96464	2.41094
chr11:125228105:125228599	chr11	125228105	125228599	.	495	1.46819	2.34998	4.84383e-05	0.00111501	16.2113	12.9779	13.1031	3.11239	7.45108	4.63122
chr11:126067113:126067726	chr11	126067113	126067726	.	614	2.00318	1.69565	4.78202e-05	0.00110445	8.36439	6.68448	7.62926	3.34557	1.36522	0.861609
chr11:126188011:126189045	chr11	126188011	126189045	.	1035	0.668438	4.36472	0.000143008	0.00256314	24.8103	23.9653	23.3261	13.893	18.7897	12.6081
chr11:126201983:126202616	chr11	126201983	126202616	.	634	1.39906	3.08433	7.21942e-07	4.24221e-05	16.7073	18.5765	20.7449	7.83007	5.02419	8.34429
chr11:126996903:126997314	chr11	126996903	126997314	.	412	1.55546	1.85759	0.000382977	0.00540169	8.56995	11.6943	15.7428	4.57038	2.84841	4.70818
chr11:127510790:127511426	chr11	127510790	127511426	.	637	0.939298	3.19804	0.00033392	0.00486253	13.8572	17.6486	23.4756	8.86812	11.5802	8.02816
chr11:128376851:128377734	chr11	128376851	128377734	.	884	0.980933	4.16605	3.66534e-07	2.49315e-05	27.2328	28.0589	24.0496	15.4915	12.7065	11.969
chr11:128394955:128396137	chr11	128394955	128396137	.	1183	0.734538	4.56549	8.31107e-06	0.000285315	24.8267	23.6823	25.4337	13.3125	14.8801	16.248
chr11:128422493:128423281	chr11	128422493	128423281	.	789	0.822521	3.69862	0.000217549	0.00351913	20.5446	19.6766	21.2365	11.9328	15.0863	7.59905
chr11:130576367:130576802	chr11	130576367	130576802	.	436	0.773554	4.64083	4.39557e-06	0.000173079	73.252	51.9787	88.4311	45.1511	34.6065	45.2991
chr11:131894291:131895115	chr11	131894291	131895115	.	825	1.0558	3.97382	6.93614e-07	4.10605e-05	28.4022	18.6017	28.3901	12.6571	8.53488	15.1762
chr11:131911665:131912634	chr11	131911665	131912634	.	970	2.08288	2.5673	6.24371e-09	9.49975e-07	11.0855	9.56621	7.24387	2.11771	2.07401	2.36336
chr11:131924729:131925297	chr11	131924729	131925297	.	569	0.886847	3.55237	0.000162857	0.00282617	29.6162	21.0122	27.231	14.1398	18.2676	9.60742
chr11:131934628:131935628	chr11	131934628	131935628	.	1001	1.44379	3.92738	2.34333e-10	6.80252e-08	25.172	18.5399	21.4186	8.37952	10.5514	4.93266
chr11:132323140:132323769	chr11	132323140	132323769	.	630	1.08952	3.00821	9.1963e-05	0.00182401	15.0302	14.1624	20.8766	8.96665	6.91886	7.55755
chr11:132502613:132502999	chr11	132502613	132502999	.	387	1.21836	3.04424	1.13701e-05	0.000360704	24.8825	30.4328	30.7263	13.7122	11.2633	11.8473
chr12:639368:639976	chr12	639368	639976	.	609	1.05265	3.31204	2.75054e-05	0.000720938	20.5556	20.5111	22.7799	10.4002	10.7362	9.55552
chr12:1325686:1327373	chr12	1325686	1327373	.	1688	0.848231	3.28975	0.000731378	0.00881567	7.03578	6.76575	7.79162	4.36067	4.8666	2.71618
chr12:1552572:1553310	chr12	1552572	1553310	.	739	1.00818	2.75066	0.000773224	0.00918129	13.4648	10.8662	10.2396	4.16951	6.80579	6.20421
chr12:1885491:1886293	chr12	1885491	1886293	.	803	0.965406	3.26691	0.000155585	0.00272588	16.389	15.1113	14.3596	6.39533	10.4389	6.58815
chr12:2102445:2103564	chr12	2102445	2103564	.	1120	0.943162	3.0242	0.000554833	0.00714976	8.02459	10.6749	8.84753	4.58522	3.89186	5.82561
chr12:3034568:3035044	chr12	3034568	3035044	.	477	1.44585	2.63392	1.28773e-05	0.000397787	21.87	15.3382	16.6193	5.0242	10.544	4.0666
chr12:3294164:3294956	chr12	3294164	3294956	.	793	1.87254	2.03498	1.06766e-05	0.00034421	8.29781	4.9506	9.08792	1.29519	3.17117	1.55662
chr12:11989258:11989738	chr12	11989258	11989738	.	481	1.82358	2.05202	1.80505e-05	0.00051484	17.0168	8.1618	11.6117	6.05008	2.09126	2.1997
chr12:12075291:12075736	chr12	12075291	12075736	.	446	2.2151	1.4905	4.85197e-05	0.00111578	10.4356	6.80178	10.0991	1.53526	1.50358	2.76771
chr12:12111483:12112353	chr12	12111483	12112353	.	871	0.638768	4.05995	0.000814765	0.00952717	23.0327	21.3071	24.2017	14.1505	13.0886	16.8042
chr12:12232090:12232515	chr12	12232090	12232515	.	426	2.53413	0.806973	0.00059447	0.00753321	5.65112	5.86444	5.49808	1.2055	1.57417	0
chr12:12407897:12408423	chr12	12407897	12408423	.	527	1.21195	3.12169	9.93192e-06	0.000325036	21.0132	17.269	28.3756	10.7192	8.27113	9.70387
chr12:13052351:13053333	chr12	13052351	13053333	.	983	1.63151	2.97916	5.96808e-08	5.88161e-06	12.8981	10.7104	11.1803	2.78627	3.06988	5.38177
chr12:13128858:13129807	chr12	13128858	13129807	.	950	0.636871	4.58279	0.000124058	0.00229954	29.9022	30.242	30.7234	18.9201	24.8827	14.4787
chr12:13499842:13501008	chr12	13499842	13501008	.	1167	0.741637	3.71068	0.000786672	0.00927904	12.5148	13.1503	15.4386	5.57404	11.0617	7.8576
chr12:14106873:14107249	chr12	14106873	14107249	.	377	1.5292	1.84147	0.000456024	0.00614349	13.6226	12.78	11.9475	4.99469	4.89163	3.27427
chr12:15063006:15063978	chr12	15063006	15063978	.	973	0.845858	3.32365	0.000709356	0.00860276	12.041	15.7723	10.5545	7.91693	8.27047	5.07461
chr12:16081266:16081784	chr12	16081266	16081784	.	519	1.3527	2.18236	0.00047405	0.00633153	11.1324	10.6587	13.1915	1.97898	3.55326	8.15458
chr12:16132479:16133212	chr12	16132479	16133212	.	734	2.69818	1.33825	1.11071e-05	0.000354467	3.93577	4.61919	7.11835	0.93287	1.14203	0.240249
chr12:19183779:19184590	chr12	19183779	19184590	.	812	0.812978	3.47035	0.000598087	0.00756384	19.765	12.5264	18.1943	9.69748	8.87798	10.207
chr12:19555854:19556315	chr12	19555854	19556315	.	462	1.00915	2.77154	0.000721761	0.00872097	19.8009	18.1537	18.3288	6.66941	8.70906	12.5959
chr12:22254792:22255238	chr12	22254792	22255238	.	447	1.66942	2.45753	2.75277e-06	0.000121024	13.2846	24.3518	15.3163	4.97844	6.37593	5.12854
chr12:22380956:22381570	chr12	22380956	22381570	.	615	1.34732	3.74598	6.50484e-09	9.78972e-07	35.7518	26.6944	29.0026	13.0822	13.63	9.17556
chr12:22423992:22424625	chr12	22423992	22424625	.	634	1.88379	2.17954	3.6236e-06	0.000149735	11.1382	10.977	9.09365	5.13005	1.58659	1.66886
chr12:22439309:22441318	chr12	22439309	22441318	.	2010	1.01682	4.48054	1.05782e-08	1.45043e-06	17.0872	13.1394	13.6246	6.8132	7.08965	7.80821
chr12:22471148:22471991	chr12	22471148	22471991	.	844	1.98017	3.47772	2.39285e-12	1.78512e-09	20.3467	25.3716	15.5832	6.69312	2.78091	6.05917
chr12:22882932:22883586	chr12	22882932	22883586	.	655	1.54146	2.49342	9.59253e-06	0.000316467	11.2712	13.6219	11.2777	2.87481	3.07144	6.46141
chr12:23131768:23132305	chr12	23131768	23132305	.	538	0.724623	3.90276	0.000503463	0.0066382	35.7974	27.5299	38.1769	21	14.0227	26.5497
chr12:23140096:23140671	chr12	23140096	23140671	.	576	1.20862	2.54801	0.000202269	0.00333098	14.2102	14.2509	11.5733	6.83538	5.5301	4.89841
chr12:24192068:24192461	chr12	24192068	24192461	.	394	2.375	3.23208	6.58737e-14	8.30966e-11	35.8459	36.6857	43.4415	3.47577	10.6377	8.05627
chr12:24975091:24975381	chr12	24975091	24975381	.	291	2.00781	1.33766	0.000474067	0.00633153	10.4788	10.4247	15.4783	0.588253	3.45669	4.84791
chr12:26081938:26082498	chr12	26081938	26082498	.	561	1.93432	2.4183	2.48447e-07	1.84751e-05	19.1675	8.90643	14.1308	2.74623	4.78144	3.4577
chr12:26208876:26210010	chr12	26208876	26210010	.	1135	0.744674	4.11761	9.53086e-05	0.00187855	19.6549	16.1938	20.4772	9.80335	10.635	13.2063
chr12:26351791:26352421	chr12	26351791	26352421	.	631	0.897567	4.01435	6.08652e-06	0.000223785	32.5562	30.5424	34.8344	17.3623	17.0041	18.1653
chr12:27338511:27338888	chr12	27338511	27338888	.	378	1.81979	1.99561	2.1189e-05	0.00058616	14.4358	17.9391	12.8691	6.34006	4.43517	1.86606
chr12:27410097:27410631	chr12	27410097	27410631	.	535	2.91673	1.08732	2.50172e-05	0.000668862	5.39972	4.66963	7.74554	0.639931	0.313363	1.31845
chr12:27726700:27727360	chr12	27726700	27727360	.	661	0.705341	4.16245	0.000171264	0.00293317	34.4778	28.0763	36.2517	18.9051	17.7541	24.0104
chr12:28134672:28135821	chr12	28134672	28135821	.	1150	1.66554	4.62682	1.32954e-17	6.58882e-14	33.4939	25.7584	37.4436	8.93121	10.7879	10.7339
chr12:28177145:28177715	chr12	28177145	28177715	.	571	0.843469	3.90096	7.1953e-05	0.00151367	23.8911	37.5019	37.5481	17.6878	23.7821	13.2798
chr12:28260676:28261213	chr12	28260676	28261213	.	538	1.01427	3.05585	0.000199104	0.00329214	21.7768	19.5694	18.0838	7.95453	8.72525	12.7832
chr12:28462919:28463204	chr12	28462919	28463204	.	286	1.40861	2.53397	2.79436e-05	0.000729942	29.7415	19.3421	34.0177	11.3722	11.1375	8.63216
chr12:29052582:29053312	chr12	29052582	29053312	.	731	1.46741	3.29988	6.33035e-08	6.17153e-06	26.3461	13.9144	16.7598	6.55689	7.10962	6.99581
chr12:29114752:29115089	chr12	29114752	29115089	.	338	1.23294	3.25402	4.62268e-06	0.000180181	33.7128	35.3725	45.8416	24.3098	13.8881	10.4345
chr12:29769771:29770517	chr12	29769771	29770517	.	747	1.52494	2.44756	1.43666e-05	0.000431869	9.23848	12.6609	8.68279	2.29159	4.71303	3.54102
chr12:30172559:30173029	chr12	30172559	30173029	.	471	2.94001	1.1044	2.57472e-05	0.00068416	7.49643	7.57735	5.35531	1.81721	0.711887	0
chr12:30570105:30571316	chr12	30570105	30571316	.	1212	0.835356	5.3089	1.12409e-09	2.34203e-07	36.6801	47.8508	40.2851	22.8807	22.8236	24.1526
chr12:31158559:31159501	chr12	31158559	31159501	.	943	1.0383	3.08253	0.000117291	0.00220165	10.7221	12.8678	11.2724	4.71975	6.40019	5.79706
chr12:42103476:42104009	chr12	42103476	42104009	.	534	1.20046	2.28585	0.000771344	0.00916392	11.7213	11.0276	12.8209	6.09073	5.6511	3.63253
chr12:43173119:43173812	chr12	43173119	43173812	.	694	1.45532	3.77248	1.06828e-09	2.25281e-07	26.132	24.17	34.2683	9.1264	7.24709	14.4835
chr12:43329537:43330350	chr12	43329537	43330350	.	814	1.89965	2.31279	5.31879e-07	3.34861e-05	8.2809	9.42654	9.29614	2.73386	2.05957	2.38301
chr12:43498187:43498946	chr12	43498187	43498946	.	760	1.02873	3.12066	0.000125663	0.00231819	17.7386	14.0879	12.3273	6.08145	8.82365	6.72887
chr12:45730094:45731368	chr12	45730094	45731368	.	1275	0.745692	3.88514	0.00036655	0.00522747	14.9792	13.296	14.2721	8.86116	11.0451	5.39401
chr12:47279980:47280903	chr12	47279980	47280903	.	924	0.663306	4.34716	0.000235608	0.0037257	20.1483	28.3892	31.3929	19.4525	17.781	12.9776
chr12:50397311:50397659	chr12	50397311	50397659	.	349	2.7604	1.26862	1.3144e-05	0.000404584	11.0367	10.2262	9.80857	2.45246	0.480371	1.51584
chr12:50400316:50400913	chr12	50400316	50400913	.	598	2.22275	1.72213	7.80888e-06	0.000271978	8.05143	11.6378	4.82055	1.71754	1.6821	1.76933
chr12:50595710:50596326	chr12	50595710	50596326	.	617	1.03675	3.21046	7.29642e-05	0.001528	21.5897	14.4608	22.1925	8.32325	10.3252	9.71743
chr12:50696487:50697036	chr12	50696487	50697036	.	550	0.944341	3.02183	0.000551327	0.00712073	17.8	18.4936	19.6547	7.1585	12.1927	9.61869
chr12:52561971:52562491	chr12	52561971	52562491	.	521	1.53087	2.05294	0.00016976	0.00291605	13.8621	9.93273	8.6453	1.97138	5.47033	3.72317
chr12:52661416:52662372	chr12	52661416	52662372	.	957	1.00409	3.50224	2.93778e-05	0.000760534	12.0746	17.9006	16.1906	7.3338	9.45984	6.08078
chr12:52890367:52890845	chr12	52890367	52890845	.	479	1.40743	2.14405	0.000270518	0.00414757	11.0568	14.1565	12.0363	5.36059	5.94998	2.57703
chr12:53386430:53387488	chr12	53386430	53387488	.	1059	1.0069	3.40767	4.1631e-05	0.000990521	13.7911	13.6489	11.3987	7.43565	4.74927	7.16028
chr12:53821718:53822695	chr12	53821718	53822695	.	978	0.806292	3.68656	0.000250841	0.00391351	17.8871	15.6916	15.2903	8.40155	7.88535	11.7201
chr12:54616258:54616831	chr12	54616258	54616831	.	574	1.0109	3.8242	3.07833e-06	0.000131836	26.2826	36.3733	34.2131	13.7184	15.1877	19.0475
chr12:54767261:54768535	chr12	54767261	54768535	.	1275	1.67989	2.97108	5.26228e-08	5.31437e-06	8.93719	9.23724	8.76111	3.3565	1.18341	3.87262
chr12:56240731:56241374	chr12	56240731	56241374	.	644	2.11932	2.01571	9.51189e-07	5.19225e-05	9.71922	9.42109	8.95245	1.86067	2.60325	1.91677
chr12:56241394:56242144	chr12	56241394	56242144	.	751	2.1379	1.66081	2.67272e-05	0.000704801	5.1289	5.46508	7.91684	0.911753	0.669705	2.58292
chr12:58895880:58897102	chr12	58895880	58897102	.	1223	0.603156	4.95878	3.79698e-05	0.000918568	35.4316	26.7013	28.7267	16.7962	22.07	21.0515
chr12:58922941:58923576	chr12	58922941	58923576	.	636	1.78696	2.38305	1.10062e-06	5.83963e-05	13.6267	10.1008	11.8979	3.49899	2.636	4.15903
chr12:59062504:59063263	chr12	59062504	59063263	.	760	2.20161	2.18971	1.84546e-07	1.41869e-05	9.71398	10.3311	7.34896	1.80191	0.661774	3.48045
chr12:59144089:59144788	chr12	59144089	59144788	.	700	0.721665	5.51621	1.376e-08	1.79448e-06	71.992	80.046	90.5988	53.0663	45.7443	48.1164
chr12:59155168:59155481	chr12	59155168	59155481	.	314	1.81814	2.093	9.12157e-06	0.00030455	24.5338	16.4807	17.2135	3.81615	5.33915	7.30081
chr12:62726375:62726710	chr12	62726375	62726710	.	336	1.77015	1.96999	3.55045e-05	0.000872247	23.4051	12.2151	13.4054	5.09469	3.99165	5.2483
chr12:62772922:62773523	chr12	62772922	62773523	.	602	1.57325	2.2655	2.46213e-05	0.000660568	14.1297	9.78196	9.27775	3.69661	3.62034	3.80807
chr12:63711687:63712243	chr12	63711687	63712243	.	557	2.36782	1.41572	5.58628e-05	0.00124582	6.91527	4.80556	9.38038	2.15129	1.80592	0
chr12:64399649:64400460	chr12	64399649	64400460	.	812	1.65929	2.62906	8.43865e-07	4.77548e-05	8.6966	9.88928	14.4223	2.31896	3.71637	4.34342
chr12:64565480:64566007	chr12	64565480	64566007	.	528	1.17496	2.98209	3.15584e-05	0.000804083	23.1011	19.9401	16.3789	8.10519	10.1606	8.01558
chr12:65930213:65931356	chr12	65930213	65931356	.	1144	1.19962	3.54807	7.52959e-07	4.36792e-05	13.1873	15.2865	13.0716	5.38683	4.54295	8.16972
chr12:66064370:66065038	chr12	66064370	66065038	.	669	0.732144	4.41776	2.12787e-05	0.000587938	37.1842	41.6109	39.0499	22.2613	22.8043	25.832
chr12:67752420:67753330	chr12	67752420	67753330	.	911	0.641131	4.50401	0.000136399	0.00247279	33.6487	24.0932	31.8409	17.851	18.5868	21.0992
chr12:67828541:67829517	chr12	67828541	67829517	.	977	1.62077	3.21822	2.35439e-08	2.80369e-06	11.9917	18.0821	11.6178	2.62817	7.37863	3.42939
chr12:68092226:68093048	chr12	68092226	68093048	.	823	1.83799	1.4447	0.000655512	0.00809675	5.26522	2.81872	5.4729	1.03999	2.03705	0.642805
chr12:69365317:69365689	chr12	69365317	69365689	.	373	1.53375	2.32962	2.42209e-05	0.000652854	15.9201	19.6148	20.77	6.42505	8.09032	4.72769
chr12:70079677:70079935	chr12	70079677	70079935	.	259	1.7672	2.25899	3.80861e-06	0.000156171	30.3633	24.1144	25.0427	9.25306	5.17836	8.85118
chr12:70811886:70812254	chr12	70811886	70812254	.	369	1.19419	3.12307	2.16588e-05	0.000594887	19.1372	29.9829	46.3847	16.7006	11.8127	12.9031
chr12:71167851:71168149	chr12	71167851	71168149	.	299	2.32154	1.79014	2.84711e-06	0.000124078	8.58819	23.2756	21.0899	2.86257	2.2428	5.30798
chr12:72258787:72259536	chr12	72258787	72259536	.	750	1.1978	3.46101	1.48224e-06	7.39307e-05	24.8227	14.5137	19.9386	9.12968	7.82364	8.9347
chr12:75838196:75838826	chr12	75838196	75838826	.	631	2.1719	1.36916	0.000144907	0.00258848	5.34125	8.20119	3.99739	1.899	0.797065	1.11786
chr12:76058994:76059473	chr12	76058994	76059473	.	480	1.10049	3.22484	2.14408e-05	0.000590748	26.7486	26.0235	24.0224	11.0555	12.2244	12.4909
chr12:76099775:76100419	chr12	76099775	76100419	.	645	0.870804	4.01283	1.37152e-05	0.0004179	37.5725	30.7094	26.5364	17.5163	15.3354	19.138
chr12:76153636:76154217	chr12	76153636	76154217	.	582	1.54759	3.1543	7.20446e-08	6.80062e-06	26.7486	13.1842	25.6941	7.94141	6.33726	8.18085
chr12:76159974:76160895	chr12	76159974	76160895	.	922	1.13056	3.62097	1.03049e-06	5.54937e-05	15.8403	18.9672	18.7594	8.72618	7.63696	8.03297
chr12:76210573:76211226	chr12	76210573	76211226	.	654	1.20276	2.31758	0.000762026	0.00908941	11.5338	6.5485	11.5704	5.7584	3.84517	3.23565
chr12:76219352:76220243	chr12	76219352	76220243	.	892	2.10819	2.84877	1.64037e-10	5.19675e-08	12.4147	11.0029	14.1387	2.68671	3.38306	2.57002
chr12:76256234:76257910	chr12	76256234	76257910	.	1677	0.999994	3.38529	7.25741e-05	0.00152305	7.27333	8.29984	8.59478	5.30796	4.49864	2.20823
chr12:76404426:76404880	chr12	76404426	76404880	.	455	2.61121	1.38813	1.0891e-05	0.000349498	5.29094	10.1969	10.6913	1.12867	1.8423	1.1627
chr12:76643288:76643787	chr12	76643288	76643787	.	500	2.61635	1.40037	8.95573e-06	0.000299879	8.02459	6.06718	9.72907	1.71182	1.0059	1.05806
chr12:76693620:76694490	chr12	76693620	76694490	.	871	1.21147	2.42771	0.000399003	0.00555769	9.76586	8.19502	6.20556	3.73416	4.23454	2.42952
chr12:77335997:77337034	chr12	77335997	77337034	.	1038	1.10886	3.38902	8.82134e-06	0.000297244	16.0801	10.6587	13.1915	5.6071	6.13745	6.79548
chr12:77518457:77518924	chr12	77518457	77518924	.	468	2.48986	3.05631	7.16292e-14	8.71865e-11	23.6623	27.072	36.5726	5.48659	5.7316	4.14481
chr12:79152347:79152956	chr12	79152347	79152956	.	610	1.41297	2.18332	0.000214115	0.00348062	7.62994	14.3342	8.27001	3.08688	4.12253	4.04721
chr12:79646168:79646739	chr12	79646168	79646739	.	572	1.94631	3.19112	4.48724e-11	1.78922e-08	28.8997	22.7738	21.4186	7.18244	4.68949	7.0907
chr12:81021354:81022190	chr12	81021354	81022190	.	837	1.39883	3.57349	1.62797e-08	2.07625e-06	14.5727	24.7309	21.0949	6.95361	7.21073	8.63806
chr12:81256293:81256854	chr12	81256293	81256854	.	562	1.38895	2.71501	9.73649e-06	0.000320151	16.8488	15.876	15.388	7.91943	5.66786	4.70666
chr12:82518565:82519033	chr12	82518565	82519033	.	469	1.23279	2.39749	0.000451486	0.00609893	19.1632	11.4145	13.4454	4.74491	4.28954	9.77593
chr12:83268764:83269171	chr12	83268764	83269171	.	408	1.23576	2.28064	0.000649646	0.00804722	12.1942	14.8705	19.8715	9.23038	4.93086	5.61876
chr12:83554977:83555764	chr12	83554977	83555764	.	788	1.152	3.61348	1.02003e-06	5.50735e-05	18.9413	24.2307	19.4344	12.1652	7.87186	8.05627
chr12:85470443:85470960	chr12	85470443	85470960	.	518	1.52427	2.04688	0.00018532	0.00311837	11.1539	6.20085	15.3038	4.29606	3.23647	3.74473
chr12:88640918:88641561	chr12	88640918	88641561	.	644	1.1307	2.52128	0.000511423	0.00670874	11.2145	12.4691	10.9108	5.58201	4.42553	5.75031
chr12:88718754:88719294	chr12	88718754	88719294	.	541	0.627748	4.27099	0.000470721	0.00630353	41.2354	40.2412	46.2908	24.0477	25.4108	33.2476
chr12:88813830:88814685	chr12	88813830	88814685	.	856	0.660085	4.10281	0.000525342	0.00685375	24.5612	27.9344	19.7848	17.1981	13.5138	15.0386
chr12:89458576:89459000	chr12	89458576	89459000	.	425	1.15989	2.92304	5.84497e-05	0.00128633	22.28	26.4521	22.0441	10.4723	7.49491	13.6925
chr12:89474622:89475234	chr12	89474622	89475234	.	613	2.00899	1.98653	3.17856e-06	0.000135211	8.63985	9.89753	9.993	2.51327	2.18792	2.30137
chr12:89556315:89556850	chr12	89556315	89556850	.	536	2.06392	2.93428	1.9937e-10	6.04031e-08	25.7506	24.3034	15.7983	7.02611	4.06612	4.60597
chr12:90353938:90355009	chr12	90353938	90355009	.	1072	1.93314	2.08449	3.30102e-06	0.000138467	6.73706	4.99384	5.54622	1.91621	0.938336	1.64499
chr12:91210290:91210934	chr12	91210290	91210934	.	645	0.836467	4.3547	4.05863e-06	0.000163145	31.6007	41.4992	47.2068	22.028	19.754	25.4262
chr12:91616321:91616896	chr12	91616321	91616896	.	576	1.67467	1.93702	0.000106918	0.0020486	5.57263	9.6039	12.8245	3.86347	2.03741	2.75536
chr12:92683708:92684432	chr12	92683708	92684432	.	725	2.47412	2.11984	2.4284e-08	2.87022e-06	12.618	10.0915	5.21866	1.65279	1.38744	1.94585
chr12:93365692:93366159	chr12	93365692	93366159	.	468	0.891945	5.25697	1.71968e-10	5.41086e-08	111.453	102.187	102.018	63.6444	53.7338	52.7521
chr12:93396268:93396907	chr12	93396268	93396907	.	640	0.60536	4.35245	0.000735044	0.00885217	37.1137	27.8823	48.7017	24.3399	21.742	28.6557
chr12:93481055:93481989	chr12	93481055	93481989	.	935	1.69178	2.65373	3.70361e-07	2.51043e-05	8.92575	7.82493	12.525	2.92931	2.68956	3.39483
chr12:93531544:93532566	chr12	93531544	93532566	.	1023	0.866439	3.29111	0.000504342	0.00664602	11.1387	13.257	11.4476	5.68932	7.70237	6.20561
chr12:93569867:93570514	chr12	93569867	93570514	.	648	1.66277	2.63216	5.60431e-07	3.47457e-05	13.622	11.2906	16.4042	4.49087	4.39821	4.08201
chr12:93591834:93592364	chr12	93591834	93592364	.	531	1.19605	3.31493	3.25655e-06	0.000137433	21.1571	25.8764	28.8404	12.895	9.78744	10.295
chr12:93781464:93782035	chr12	93781464	93782035	.	572	1.18174	2.57686	0.000254699	0.00396299	14.3096	10.607	16.0639	7.48171	4.98259	5.54925
chr12:94821031:94821941	chr12	94821031	94821941	.	911	1.56784	2.04273	0.000130158	0.00238269	8.45621	3.9176	6.13085	2.63067	1.47222	2.12928
chr12:96199455:96200369	chr12	96199455	96200369	.	915	0.980357	4.04241	1.38212e-06	6.9994e-05	19.2941	26.1332	25.0069	11.0379	14.8411	9.63622
chr12:97505851:97506551	chr12	97505851	97506551	.	701	2.01321	2.51069	3.0971e-08	3.49944e-06	13.9658	12.4734	10.2806	2.44196	4.30483	2.26403
chr12:99131741:99132329	chr12	99131741	99132329	.	589	1.441	2.38815	8.47099e-05	0.00171797	8.71942	17.572	10.4002	7.84703	2.84634	2.69454
chr12:99146350:99147168	chr12	99146350	99147168	.	819	0.680582	4.89376	6.63632e-06	0.000240056	36.0568	46.6271	50.1567	29.0528	23.9499	29.7134
chr12:102078912:102079357	chr12	102078912	102079357	.	446	1.16599	2.52202	0.000399853	0.00556729	16.1931	14.0037	20.1982	6.14104	6.39022	9.88468
chr12:102187154:102187650	chr12	102187154	102187650	.	497	1.19778	2.78165	0.000118656	0.00221895	15.5002	22.979	16.6755	6.19974	4.72252	13.1281
chr12:102591361:102591977	chr12	102591361	102591977	.	617	1.21407	3.16705	8.42705e-06	0.000287106	19.2486	14.4608	25.1126	9.71046	9.23838	6.28775
chr12:103663473:103664091	chr12	103663473	103664091	.	619	0.728088	3.95082	0.000314492	0.00464342	34.4837	25.3688	31.4348	22.9533	16.5212	15.6686
chr12:104400607:104401168	chr12	104400607	104401168	.	562	1.27795	2.86833	1.53263e-05	0.000454611	14.5642	19.0512	19.235	8.52862	6.8611	6.27554
chr12:104674421:104675014	chr12	104674421	104675014	.	594	0.65719	4.60484	5.44511e-05	0.00122141	50.255	50.7702	47.3168	30.5476	37.5377	25.828
chr12:104898757:104899518	chr12	104898757	104899518	.	762	0.788984	3.95274	7.73815e-05	0.00160308	26.1168	26.2284	23.1712	15.0514	14.5208	14.1167
chr12:105332104:105332635	chr12	105332104	105332635	.	532	1.39623	2.35956	8.93484e-05	0.00178553	13.8771	9.39193	15.9171	5.47009	5.67235	3.64618
chr12:105647353:105648377	chr12	105647353	105648377	.	1025	1.70813	1.82085	0.000197322	0.0032689	4.22759	2.9596	7.20672	0.668026	1.96272	1.72042
chr12:106107402:106108555	chr12	106107402	106108555	.	1154	0.873254	3.399	0.000310771	0.00460643	11.9604	12.216	10.1481	7.56522	6.10162	5.04273
chr12:106678097:106678775	chr12	106678097	106678775	.	679	1.25012	2.32108	0.000466827	0.00625984	8.98187	9.46109	10.6137	2.26898	4.44431	5.4539
chr12:107771770:107772188	chr12	107771770	107772188	.	419	1.06511	2.94547	0.000201371	0.00332013	21.833	17.8872	31.8196	11.4393	8.80259	13.8886
chr12:110439300:110440061	chr12	110439300	110440061	.	762	0.785034	3.48402	0.000818445	0.00955758	18.5345	20.3738	15.1322	8.76126	10.1206	12.4967
chr12:110661620:110662659	chr12	110661620	110662659	.	1040	1.26149	2.24405	0.000602465	0.00760397	5.7098	7.72125	4.5042	2.46897	1.77321	3.22165
chr12:116576193:116577060	chr12	116576193	116577060	.	868	0.775063	4.03009	9.82329e-05	0.00192308	28.1046	22.203	19.3037	10.6495	14.0995	16.0496
chr12:120557229:120557878	chr12	120557229	120557878	.	650	1.84428	1.44733	0.000588263	0.00748051	5.18512	5.21613	6.92954	2.63356	1.28961	0.81389
chr12:121255705:121256989	chr12	121255705	121256989	.	1285	2.16258	1.81435	7.57032e-06	0.000266074	5.49544	4.16607	2.38355	0.532861	1.5656	0.548927
chr12:123519389:123519956	chr12	123519389	123519956	.	568	0.902461	4.06086	4.74606e-06	0.000183812	43.5136	36.7575	32.0369	19.2881	19.4804	21.4219
chr12:124783920:124784579	chr12	124783920	124784579	.	660	1.36634	2.37019	9.81707e-05	0.00192308	9.72678	10.2742	11.7382	3.89049	3.5562	4.80935
chr12:130329132:130329598	chr12	130329132	130329598	.	467	2.11342	1.83985	5.71829e-06	0.000213413	13.7466	8.40648	11.574	2.56589	3.23093	1.88804
chr13:20484378:20485172	chr13	20484378	20485172	.	795	1.52086	2.15407	8.73114e-05	0.00175534	6.8638	8.75398	7.47867	1.72258	3.37408	2.88359
chr13:21182793:21184087	chr13	21182793	21184087	.	1295	0.697441	5.11091	9.48432e-07	5.18178e-05	27.6368	38.9964	31.5816	18.2417	21.3607	20.8343
chr13:24084126:24085009	chr13	24084126	24085009	.	884	0.893675	3.62554	0.000103809	0.00200398	13.6164	18.7732	20.7886	7.55213	12.5168	8.37827
chr13:24364704:24365329	chr13	24364704	24365329	.	626	1.6313	2.60964	1.0027e-06	5.43072e-05	15.3826	12.5426	13.8148	5.19561	4.82059	3.38037
chr13:24368766:24369460	chr13	24368766	24369460	.	695	3.08549	1.38084	1.01739e-06	5.49741e-05	8.08232	3.59461	5.70316	0.738913	0.723666	0.507461
chr13:24502884:24503534	chr13	24502884	24503534	.	651	1.36983	1.98356	0.000768819	0.00914934	9.36819	6.85279	7.74916	2.10361	3.34784	3.79232
chr13:24752574:24753722	chr13	24752574	24753722	.	1149	0.603939	5.14602	9.81405e-06	0.00032209	36.177	34.7885	39.5146	26.221	21.4486	25.0164
chr13:28134000:28134482	chr13	28134000	28134482	.	483	1.60409	2.27393	3.39208e-05	0.000848194	7.97475	18.4727	16.0398	4.96178	6.942	1.82549
chr13:30010401:30010840	chr13	30010401	30010840	.	440	1.54683	2.17819	6.00141e-05	0.00131267	17.1434	14.1946	11.0558	5.44669	3.42919	5.61091
chr13:30228821:30229318	chr13	30228821	30229318	.	498	2.20687	2.42042	1.08352e-08	1.47401e-06	12.8909	15.0497	22.0688	2.40617	3.36645	4.95743
chr13:30576517:30577095	chr13	30576517	30577095	.	579	1.04724	2.77398	0.000445895	0.00604196	13.0278	14.7935	17.7367	5.61736	8.1074	8.22324
chr13:30765485:30766154	chr13	30765485	30766154	.	670	0.917489	3.48948	0.000145741	0.00259726	22.2772	18.91	22.5882	14.3077	12.7614	6.57995
chr13:32470516:32470915	chr13	32470516	32470915	.	400	1.66538	2.06174	6.02957e-05	0.00131716	9.22828	17.8447	17.116	6.84726	2.09562	4.84943
chr13:32708178:32709073	chr13	32708178	32709073	.	896	0.918814	3.51311	9.87927e-05	0.00193132	15.7626	19.7168	13.0702	8.78834	9.54254	7.28201
chr13:33455231:33456277	chr13	33455231	33456277	.	1047	1.54811	2.20782	4.78973e-05	0.00110549	5.9782	4.77221	7.57153	1.96197	2.56198	1.68427
chr13:34609674:34610577	chr13	34609674	34610577	.	904	2.28879	1.16057	0.000285296	0.00431897	3.90577	4.54012	1.99301	0.56808	1.11272	0.390139
chr13:36936278:36936925	chr13	36936278	36936925	.	648	1.02481	3.10423	0.000129689	0.00237472	18.5754	14.5952	18.0724	9.77426	7.76155	7.61975
chr13:38114229:38114704	chr13	38114229	38114704	.	476	2.37749	1.60428	6.92076e-06	0.000248018	9.77786	7.87264	10.9766	1.07888	2.81764	1.48187
chr13:40450144:40450944	chr13	40450144	40450944	.	801	0.919031	3.37517	0.000187996	0.00314976	15.2277	17.3768	16.6447	8.97581	6.279	10.7875
chr13:40638339:40639686	chr13	40638339	40639686	.	1348	0.940346	3.75935	1.49046e-05	0.000445291	13.0965	11.7817	13.7665	7.87334	6.09408	6.14845
chr13:41713166:41714439	chr13	41713166	41714439	.	1274	1.8089	2.96615	1.10185e-08	1.49309e-06	10.204	9.10442	8.06089	2.82167	3.94779	0.968916
chr13:44489078:44489849	chr13	44489078	44489849	.	772	1.56201	2.3204	1.7499e-05	0.000502725	8.52353	10.4017	8.16824	3.10433	3.04027	2.9695
chr13:44739602:44740499	chr13	44739602	44740499	.	898	0.699344	3.97617	0.000372261	0.00528601	20.1955	20.6664	22.8721	14.1063	12.135	12.9606
chr13:44886872:44888416	chr13	44886872	44888416	.	1545	0.755284	5.55372	2.69389e-09	4.68426e-07	40.4086	32.5708	40.6981	21.6054	21.4852	24.3113
chr13:45039091:45039777	chr13	45039091	45039777	.	687	1.2556	2.98477	1.05466e-05	0.000341448	16.3529	13.5069	16.7842	8.2227	5.36868	5.90376
chr13:45780322:45781703	chr13	45780322	45781703	.	1382	0.630808	5.448	8.29874e-07	4.71806e-05	35.4197	34.3464	44.5857	27.0026	23.6553	23.0955
chr13:45798330:45798789	chr13	45798330	45798789	.	460	1.87738	2.12856	4.2467e-06	0.000168653	10.4669	12.0257	19.1918	4.09347	2.91564	4.21689
chr13:45969978:45970403	chr13	45969978	45970403	.	426	1.96402	1.72384	5.61412e-05	0.00125093	9.04179	11.7289	12.6879	4.82202	2.7548	0.8279
chr13:46671093:46671511	chr13	46671093	46671511	.	419	0.818335	3.4943	0.000513979	0.00672998	42.1339	25.5532	31.8196	18.7932	17.6052	20.2016
chr13:46687557:46688208	chr13	46687557	46688208	.	652	1.36195	3.1429	6.88881e-07	4.092e-05	19.4461	20.2531	16.5799	8.139	6.94254	6.76161
chr13:46974319:46974921	chr13	46974319	46974921	.	603	0.855452	3.61393	0.000154683	0.00271554	22.8894	23.3786	30.1774	16.1813	12.5111	13.4523
chr13:47063572:47064275	chr13	47063572	47064275	.	704	2.11494	1.70913	1.66751e-05	0.000485897	6.83914	7.35078	6.14209	0.972623	2.38138	1.25243
chr13:47180473:47180742	chr13	47180473	47180742	.	270	2.41746	1.14341	0.000165196	0.00285391	12.4827	9.9137	12.6785	1.26801	1.24185	3.91873
chr13:47908224:47908900	chr13	47908224	47908900	.	677	1.85519	2.98048	2.24279e-09	4.06424e-07	21.5728	15.0243	15.7015	5.56277	5.69562	3.12572
chr13:47994576:47995233	chr13	47994576	47995233	.	658	1.18734	3.33645	3.82996e-06	0.000156676	24.3909	20.0685	17.2501	6.76401	11.2106	9.11193
chr13:48073334:48074326	chr13	48073334	48074326	.	993	1.85787	1.70807	0.000155415	0.00272389	4.8487	4.49261	4.53595	1.20672	2.36364	0.177586
chr13:50897464:50898313	chr13	50897464	50898313	.	850	0.96904	3.54719	4.03449e-05	0.000964219	13.7834	18.6844	20.7723	7.04865	9.46726	10.5806
chr13:50927466:50928462	chr13	50927466	50928462	.	997	1.05034	4.56774	2.22878e-09	4.06166e-07	26.8828	30.7852	37.407	17.3414	14.6294	13.7961
chr13:51059988:51060548	chr13	51059988	51060548	.	561	1.29419	2.83774	1.85341e-05	0.000525929	15.4484	17.1767	19.2693	8.23869	8.66637	4.08637
chr13:51148855:51149274	chr13	51148855	51149274	.	420	2.2801	1.35143	0.000119887	0.00223476	9.17096	6.37309	10.7243	0.81515	3.99165	0.419864
chr13:51155138:51155459	chr13	51155138	51155459	.	322	1.65252	2.17063	2.6338e-05	0.000696657	19.4384	24.384	15.1073	5.84782	8.85105	3.83354
chr13:51163295:51164278	chr13	51163295	51164278	.	984	0.935707	4.50839	6.34231e-08	6.17153e-06	29.8476	28.2903	31.6759	17.5705	14.8227	14.516
chr13:51250610:51251207	chr13	51250610	51251207	.	598	0.810389	3.66815	0.00025035	0.00390687	30.0587	25.6629	23.1989	18.0342	14.0175	12.9751
chr13:52132058:52132569	chr13	52132058	52132569	.	512	1.24055	2.93571	1.9149e-05	0.000540063	15.673	21.2602	23.5767	6.68678	10.4781	8.26607
chr13:52193656:52194155	chr13	52193656	52194155	.	500	1.26676	2.33541	0.000380803	0.00538089	15.0862	9.27922	15.4944	5.13545	4.02358	7.40639
chr13:52930441:52930767	chr13	52930441	52930767	.	327	0.759167	4.0417	0.000160238	0.00278979	52.0249	49.6594	84.8498	32.9799	33.3248	43.6812
chr13:53312192:53312799	chr13	53312192	53312799	.	608	1.35872	2.11744	0.000678434	0.00832503	8.44694	7.63094	12.4458	5.91252	1.10296	4.06052
chr13:59429459:59430832	chr13	59429459	59430832	.	1374	1.11837	3.41955	7.58461e-06	0.000266282	8.87728	10.7795	11.408	3.23924	5.00264	6.0321
chr13:60976155:60976475	chr13	60976155	60976475	.	321	1.64082	2.91385	1.21804e-07	1.02932e-05	36.9981	25.5718	39.289	14.3985	12.0123	6.0429
chr13:61736833:61737296	chr13	61736833	61737296	.	464	1.66262	2.60856	1.36071e-06	6.90608e-05	23.1745	14.2296	19.0264	9.22315	2.89051	5.70074
chr13:63217004:63217799	chr13	63217004	63217799	.	796	1.20963	2.34579	0.000620787	0.0077761	7.0568	10.7606	7.24293	4.9462	3.36984	2.4369
chr13:63782832:63783703	chr13	63782832	63783703	.	872	0.942392	3.10655	0.000510752	0.00670342	11.4111	13.5063	12.6035	9.61915	5.5755	4.24679
chr13:65502970:65503589	chr13	65502970	65503589	.	620	0.850915	3.73558	0.000195198	0.003242	20.9675	30.2208	29.9311	22.9162	12.7089	9.10156
chr13:66071340:66071798	chr13	66071340	66071798	.	459	1.97565	1.5366	0.000171095	0.00293223	7.34276	6.22036	13.3458	2.98356	2.55674	1.15257
chr13:66114407:66114725	chr13	66114407	66114725	.	319	1.30112	2.43707	0.000134757	0.00245135	25.6586	23.4945	18.6381	8.58591	9.45984	9.39758
chr13:67508118:67508420	chr13	67508118	67508420	.	303	1.00375	2.86932	0.000532875	0.00692857	23.8354	28.2688	40.4337	12.994	16.5989	16.2957
chr13:67873292:67873902	chr13	67873292	67873902	.	611	1.08937	2.64906	0.000497489	0.00658321	16.0229	10.514	12.9745	7.00416	4.66455	6.92672
chr13:67943951:67944547	chr13	67943951	67944547	.	597	1.13086	3.59048	1.6094e-06	7.90796e-05	24.1947	32.2818	24.4449	12.0429	10.3903	14.4737
chr13:73985314:73986136	chr13	73985314	73986136	.	823	1.335	3.28304	3.8952e-07	2.6132e-05	19.1108	16.045	13.7917	6.8639	6.11116	6.42805
chr13:74997672:74997941	chr13	74997672	74997941	.	270	2.51238	0.943357	0.000299368	0.0044744	8.91621	11.2355	10.0093	3.17003	1.24185	0.653121
chr13:75939912:75940353	chr13	75939912	75940353	.	442	1.78522	2.10706	9.87933e-06	0.000323661	12.7086	13.3229	15.8972	5.03475	3.03438	3.98965
chr13:75942303:75942727	chr13	75942303	75942727	.	425	1.32	2.7797	1.88069e-05	0.000532147	27.5668	17.2148	20.7723	6.0417	10.2562	9.95818
chr13:76278841:76280344	chr13	76278841	76280344	.	1504	0.944804	4.19842	6.29866e-07	3.79109e-05	15.1528	15.5429	16.6512	8.30868	7.13402	9.14543
chr13:76372364:76373543	chr13	76372364	76373543	.	1180	0.717624	3.88913	0.000500675	0.00661024	15.3691	11.9468	18.4749	9.42949	7.81417	10.6105
chr13:78169258:78170231	chr13	78169258	78170231	.	974	1.35593	3.81954	3.0592e-09	5.25365e-07	25.8698	18.5042	16.463	7.5573	7.22923	9.0525
chr13:80058958:80059964	chr13	80058958	80059964	.	1007	1.02283	3.87144	2.10348e-06	9.78414e-05	20.7189	16.1258	20.2175	11.5594	9.98904	6.47933
chr13:80167621:80168365	chr13	80167621	80168365	.	745	1.21162	3.1194	1.00523e-05	0.000328357	12.2792	15.0901	19.8306	5.74435	7.65111	6.86435
chr13:80298478:80299098	chr13	80298478	80299098	.	621	1.31759	3.19295	1.04865e-06	5.62686e-05	21.709	17.8159	21.1792	9.92357	7.55907	6.81518
chr13:80561226:80561957	chr13	80561226	80561957	.	732	2.71244	2.30417	1.92458e-10	5.88226e-08	10.7433	8.2885	13.7833	1.40313	1.37418	2.16815
chr13:80562707:80563944	chr13	80562707	80563944	.	1238	0.987666	4.50683	2.3136e-08	2.77232e-06	22.557	27.3868	22.2663	10.0939	11.7815	14.529
chr13:80564104:80564643	chr13	80564104	80564643	.	540	0.877273	3.20096	0.000635007	0.00791363	23.7766	20.4883	19.3514	9.19308	13.3499	12.0827
chr13:82094320:82095159	chr13	82094320	82095159	.	840	1.10404	2.54914	0.000698698	0.00851496	8.9799	11.0467	6.86354	2.85303	4.5904	5.03836
chr13:84974722:84975374	chr13	84974722	84975374	.	653	1.00395	3.95178	1.26923e-06	6.51728e-05	30.2305	25.6876	36.9717	15.9909	15.9177	14.3127
chr13:86160549:86161378	chr13	86160549	86161378	.	830	0.605	4.80912	8.03643e-05	0.00165303	42.7334	37.8393	40.1579	20.0056	30.2981	29.1072
chr13:88684067:88684567	chr13	88684067	88684567	.	501	1.51743	1.78611	0.000690387	0.00842848	7.04754	11.0416	9.70965	3.75848	2.67704	3.16783
chr13:90378821:90379658	chr13	90378821	90379658	.	838	1.61981	3.7178	2.79575e-11	1.28456e-08	24.3227	20.8685	24.0797	6.53677	9.60283	6.31299
chr13:90757421:90758330	chr13	90757421	90758330	.	910	1.84888	2.10758	8.85945e-06	0.000298238	5.82003	7.05943	7.72148	0.564335	2.76345	2.3254
chr13:93491108:93491529	chr13	93491108	93491529	.	422	1.49941	3.42751	7.01858e-09	1.03245e-06	37.6509	30.4459	41.413	10.9524	13.9046	13.7898
chr13:93822027:93823283	chr13	93822027	93823283	.	1257	0.838168	4.57027	8.6027e-07	4.82652e-05	20.1732	25.5532	26.0864	11.4393	12.4037	16.2735
chr13:93869940:93870285	chr13	93869940	93870285	.	346	1.51753	2.85673	1.33162e-06	6.77331e-05	37.1079	27.3343	23.953	6.92642	7.26804	16.8188
chr13:93915012:93915522	chr13	93915012	93915522	.	511	1.44302	2.06709	0.000292147	0.00439869	10.9926	7.68263	14.4557	4.68991	3.28081	4.14112
chr13:94512085:94512391	chr13	94512085	94512391	.	307	2.82698	1.67182	1.62032e-07	1.28624e-05	15.6832	18.019	15.2585	2.23038	1.63827	2.87203
chr13:94962348:94963209	chr13	94962348	94963209	.	862	1.14312	4.37258	9.56289e-10	2.07335e-07	35.0029	35.3995	27.1715	15.0926	15.3646	13.7065
chr13:95071603:95072004	chr13	95071603	95072004	.	402	1.63091	1.81758	0.00026417	0.00407836	13.1747	12.4291	10.3081	3.4066	5.4215	2.63198
chr13:95293708:95294477	chr13	95293708	95294477	.	770	1.01507	3.58711	2.29748e-05	0.000623383	27.5129	15.7589	17.3148	13.7835	8.49133	7.78656
chr13:96157567:96157944	chr13	96157567	96157944	.	378	2.48659	1.30278	4.95024e-05	0.00113424	9.76537	8.02538	10.9626	3.62289	0.887034	0.466515
chr13:96187551:96188056	chr13	96187551	96188056	.	506	1.61664	1.70798	0.000687552	0.00840274	9.51532	9.16919	7.47733	4.73625	2.98191	0.697007
chr13:97906984:97907590	chr13	97906984	97907590	.	607	0.699567	4.07824	0.000291344	0.00439232	33.0502	32.3379	35.9149	16.9207	19.0573	26.4369
chr13:97947881:97948510	chr13	97947881	97948510	.	630	2.00717	1.33743	0.000388832	0.00546428	4.84023	6.51472	5.43364	0.81515	1.33055	1.95936
chr13:99329691:99330060	chr13	99329691	99330060	.	370	1.17584	2.87783	5.62467e-05	0.00125237	25.5919	23.1498	30.1903	13.8796	9.06213	11.915
chr13:99542499:99542940	chr13	99542499	99542940	.	442	0.714337	4.01053	0.000283613	0.00429772	45.0249	37.1427	50.9525	29.0466	29.2059	22.741
chr13:99650119:99650606	chr13	99650119	99650606	.	488	2.04556	2.12051	1.10674e-06	5.86596e-05	17.4305	11.7014	10.3375	4.91095	2.06126	2.52951
chr13:99974141:99975222	chr13	99974141	99975222	.	1082	0.827446	3.81665	8.54504e-05	0.00172945	18.6894	15.5028	14.4867	8.70147	8.67686	10.1047
chr13:101015670:101016530	chr13	101015670	101016530	.	861	1.76883	2.25362	4.00183e-06	0.000161329	6.71046	10.3628	6.90539	2.58462	2.53129	1.8433
chr13:104612315:104612805	chr13	104612315	104612805	.	491	1.16678	3.29713	5.86916e-06	0.000218105	29.4181	29.4382	21.2826	10.4592	11.9506	13.2886
chr13:104963124:104963587	chr13	104963124	104963587	.	464	1.53074	1.925	0.00030929	0.00459104	7.26364	13.0758	13.202	4.42711	3.61313	3.42044
chr13:106577781:106578279	chr13	106577781	106578279	.	499	1.09401	3.21812	3.35217e-05	0.000841437	27.3383	23.6022	22.3856	14.4081	12.4309	7.42124
chr13:110036763:110037185	chr13	110036763	110037185	.	423	1.12989	3.23129	1.6965e-05	0.000491043	28.456	28.6864	31.0928	9.30775	13.8717	17.0923
chr13:110975439:110975897	chr13	110975439	110975897	.	459	1.13433	2.8692	0.000109379	0.00208595	17.4828	19.8274	25.514	8.57773	7.67023	12.294
chr13:111034244:111035110	chr13	111034244	111035110	.	867	1.13077	4.73011	2.13597e-11	1.07387e-08	45.1672	35.1953	44.0549	18.1646	18.95	19.7292
chr13:111617082:111618125	chr13	111617082	111618125	.	1044	0.729929	3.68913	0.000725632	0.00876316	13.8355	15.3833	15.8769	9.01819	8.8321	9.29009
chr13:115050740:115051215	chr13	115050740	115051215	.	476	1.31555	2.39475	0.000207308	0.00339703	13.8239	11.2466	19.3037	6.11363	3.16984	8.52076
chr14:22868815:22869652	chr14	22868815	22869652	.	838	1.83561	2.30881	1.20014e-06	6.24882e-05	10.342	8.30479	7.09492	2.45129	2.00059	2.73563
chr14:31022422:31023403	chr14	31022422	31023403	.	982	0.713783	3.85761	0.000705499	0.00857374	20.7561	16.718	16.1454	13.7712	7.17034	11.852
chr14:31830059:31831091	chr14	31830059	31831091	.	1033	1.55328	2.13277	0.000220213	0.00355312	5.59313	6.21886	5.75561	1.3257	4.38193	0.170709
chr14:32406814:32407569	chr14	32406814	32407569	.	756	0.948602	3.60518	2.84786e-05	0.000740848	20.3799	20.7716	20.7336	10.4158	10.6444	10.9631
chr14:32424103:32424642	chr14	32424103	32424642	.	540	0.985288	2.85905	0.000708894	0.00859994	17.5352	19.1665	14.3467	12.0461	6.83016	6.85777
chr14:32479261:32480725	chr14	32479261	32480725	.	1465	0.667319	5.73032	1.44676e-08	1.86921e-06	42.3961	43.3631	46.856	28.9782	26.3204	28.1667
chr14:33080607:33081465	chr14	33080607	33081465	.	859	1.06714	3.07356	0.000135698	0.00246351	18.1231	12.0488	7.76044	7.17408	5.85504	5.13221
chr14:33131343:33132040	chr14	33131343	33132040	.	698	1.26601	3.78857	5.61713e-08	5.59937e-06	22.5332	38.0925	21.424	11.2813	8.64667	14.1478
chr14:33589559:33590608	chr14	33589559	33590608	.	1050	1.14373	3.29445	1.01824e-05	0.000332137	10.2409	13.0861	14.0703	7.17332	4.15132	5.5422
chr14:34206467:34207348	chr14	34206467	34207348	.	882	0.712451	4.36756	6.28911e-05	0.00136186	27.1126	31.3597	27.3725	22.5137	15.3964	14.3953
chr14:34668816:34669205	chr14	34668816	34669205	.	390	1.07049	3.8965	4.87683e-07	3.12712e-05	44.4439	57.1944	50.3546	28.9692	21.4935	21.7037
chr14:35182408:35183424	chr14	35182408	35183424	.	1017	0.958817	3.93895	2.88738e-06	0.000125596	18.4637	18.9501	21.0816	9.25761	10.5502	10.2303
chr14:44998145:44998626	chr14	44998145	44998626	.	482	1.95353	3.32196	1.18731e-11	6.53774e-09	35.9608	28.1368	31.3986	11.3648	5.2173	8.04884
chr14:49978914:49979459	chr14	49978914	49979459	.	546	2.48565	1.76468	8.51769e-07	4.80403e-05	5.58488	11.7657	11.5492	1.5676	1.2282	2.2608
chr14:50416869:50417771	chr14	50416869	50417771	.	903	0.957177	3.80582	8.42944e-06	0.000287106	16.5291	21.3424	22.1469	9.85763	10.0255	10.936
chr14:50441781:50442859	chr14	50441781	50442859	.	1079	0.897218	4.66192	9.68694e-08	8.59437e-06	25.881	30.5956	34.0633	20.307	14.7606	13.4014
chr14:50505202:50505700	chr14	50505202	50505700	.	499	2.77795	2.42357	4.52011e-11	1.79203e-08	18.6544	19.3109	14.8034	2.74439	0.671941	4.24071
chr14:50552489:50553304	chr14	50552489	50553304	.	816	1.0837	4.61794	4.65189e-10	1.17791e-07	39.5329	43.9556	37.535	15.1043	19.518	22.4751
chr14:50919606:50920800	chr14	50919606	50920800	.	1195	0.901742	5.63306	4.83101e-12	3.075e-09	64.331	44.3503	52.3166	29.7956	28.4793	28.0378
chr14:50987815:50989187	chr14	50987815	50989187	.	1373	1.29626	2.32476	0.000259004	0.00401647	5.96146	4.41893	4.06789	2.11951	1.95367	1.79811
chr14:51192971:51193382	chr14	51192971	51193382	.	412	2.10473	1.63508	5.27129e-05	0.00119258	8.18041	11.2612	13.5563	0.415489	2.03458	5.1362
chr14:51313136:51313540	chr14	51313136	51313540	.	405	1.23634	2.27759	0.000782964	0.00925567	14.2659	15.8619	16.9046	3.80404	11.5906	4.35414
chr14:51553576:51554424	chr14	51553576	51554424	.	849	1.21588	2.37944	0.000553841	0.00714229	6.42723	11.5601	6.15415	2.41953	3.35694	4.56954
chr14:51762393:51762830	chr14	51762393	51762830	.	438	1.02911	2.95163	0.000293264	0.00441073	17.9546	24.8522	25.5032	15.2422	9.18627	8.8574
chr14:51863070:51863539	chr14	51863070	51863539	.	470	0.758069	3.7296	0.000412978	0.00569971	36.879	33.791	32.9669	20.7603	23.1856	17.2591
chr14:51909241:51910160	chr14	51909241	51910160	.	920	1.19657	2.48804	0.000432416	0.00590572	5.58232	8.14647	10.3792	2.04674	4.92014	3.45018
chr14:51915605:51916023	chr14	51915605	51916023	.	419	2.6109	1.16039	6.22758e-05	0.00135064	9.57588	6.81419	6.87992	2.04274	0.400118	1.2626
chr14:51999675:52000495	chr14	51999675	52000495	.	821	2.02508	3.93391	2.4766e-16	7.47073e-13	30.2999	28.9079	28.5284	8.96566	7.75965	4.72538
chr14:52109729:52110461	chr14	52109729	52110461	.	733	0.851632	4.25086	5.16819e-06	0.000197341	27.8069	41.1425	29.7412	17.2816	19.2122	18.0433
chr14:52322013:52322476	chr14	52322013	52322476	.	464	1.75484	2.85927	4.94993e-08	5.05782e-06	31.1299	14.6142	22.9093	9.22315	6.14233	4.94064
chr14:52334384:52335208	chr14	52334384	52335208	.	825	0.62378	4.44492	0.000398611	0.005555	34.4328	20.7647	39.3094	22.2017	20.1179	19.0236
chr14:53511247:53511645	chr14	53511247	53511645	.	399	1.55569	1.86239	0.000464036	0.00623286	15.2849	13.417	8.12788	7.29345	2.94122	2.20981
chr14:53835328:53835948	chr14	53835328	53835948	.	621	1.35404	2.21006	0.000294091	0.00441837	8.27011	10.6321	11.0248	5.23744	2.69967	3.69155
chr14:54649037:54649996	chr14	54649037	54649996	.	960	0.973871	3.91729	2.84698e-06	0.000124078	16.8851	22.4917	21.958	9.98559	10.1288	11.0214
chr14:58283461:58284094	chr14	58283461	58284094	.	634	1.05172	3.71927	2.64235e-06	0.000116694	22.7827	30.9608	28.4177	14.5801	13.7504	11.1257
chr14:58312734:58313198	chr14	58312734	58313198	.	465	1.02749	2.72601	0.000684087	0.0083722	21.3989	13.8152	18.9854	10.3077	7.9318	8.3431
chr14:58571234:58571982	chr14	58571234	58571982	.	749	0.695704	4.19491	0.000160016	0.00278802	30.8556	31.6868	26.4599	19.8836	19.2495	15.7743
chr14:59172581:59173068	chr14	59172581	59173068	.	488	1.8751	1.72509	8.57707e-05	0.00173296	7.56416	9.5074	11.8143	1.75391	2.06126	3.97494
chr14:59720688:59721554	chr14	59720688	59721554	.	867	1.54773	1.81384	0.000576694	0.00737395	7.9598	5.14552	3.11709	1.77697	2.32041	1.42376
chr14:59787652:59788654	chr14	59787652	59788654	.	1003	0.829169	3.47562	0.00054915	0.00709894	16.1612	12.4539	12.574	6.99745	10.6975	5.45027
chr14:61244646:61245124	chr14	61244646	61245124	.	479	2.62621	2.40522	1.74375e-10	5.44962e-08	13.0672	15.2741	25.5771	2.50161	3.84999	2.20889
chr14:61412654:61413305	chr14	61412654	61413305	.	652	1.43508	2.97607	7.78974e-07	4.48136e-05	15.5076	17.2425	17.9615	5.77607	7.4568	5.40929
chr14:61619579:61620480	chr14	61619579	61620480	.	902	1.50394	3.17265	5.96364e-08	5.88161e-06	13.1667	16.4203	13.183	4.7445	5.76179	4.49654
chr14:62050871:62051472	chr14	62050871	62051472	.	602	1.05798	2.8915	0.000272791	0.00416678	13.8631	15.7104	18.2562	7.39322	5.01277	10.5454
chr14:64883593:64884413	chr14	64883593	64884413	.	821	1.55038	1.76772	0.000639311	0.00794615	7.42837	5.43382	3.73064	2.08504	2.04201	1.50353
chr14:65636077:65636583	chr14	65636077	65636583	.	507	3.04492	1.18197	1.05277e-05	0.000341154	6.01449	4.22359	10.3055	0	0.992008	1.39126
chr14:65646496:65647621	chr14	65646496	65647621	.	1126	0.937781	3.63782	3.36149e-05	0.000843168	12.6854	12.8367	16.9608	7.75334	6.70002	7.67388
chr14:68591687:68592762	chr14	68591687	68592762	.	1076	0.711829	4.48422	4.37248e-05	0.00103079	24.0141	19.2377	33.1536	17.1818	14.8018	14.586
chr14:68935602:68936040	chr14	68935602	68936040	.	439	1.37702	3.53113	2.50053e-08	2.93052e-06	31.8059	35.7706	43.503	15.5974	14.5118	12.4524
chr14:69149378:69149995	chr14	69149378	69149995	.	618	1.39869	3.23379	1.86512e-07	1.42985e-05	22.3338	18.1912	23.3227	8.03279	8.13832	7.98964
chr14:69154340:69154904	chr14	69154340	69154904	.	565	0.94584	4.21249	6.57883e-07	3.92805e-05	40.0519	40.7427	46.5567	18.7845	20.7707	26.5294
chr14:69181763:69182131	chr14	69181763	69182131	.	369	1.65934	2.28782	1.25909e-05	0.000390677	16.9625	19.3438	20.0187	2.31953	7.26935	8.12419
chr14:69251038:69253819	chr14	69251038	69253819	.	2782	1.5152	4.88886	5.47469e-18	3.45304e-14	15.23	14.2398	17.3562	5.35327	5.06202	5.95838
chr14:69544439:69545059	chr14	69544439	69545059	.	621	1.13499	3.71368	7.30404e-07	4.27641e-05	29.7207	29.8848	25.2409	12.9558	16.7379	8.80294
chr14:69604322:69605655	chr14	69604322	69605655	.	1334	1.22436	2.46239	0.00025603	0.00398015	5.29358	5.35072	5.67246	2.05315	2.26214	2.64382
chr14:70151671:70152275	chr14	70151671	70152275	.	605	1.01848	3.25112	7.73411e-05	0.00160272	20.9568	19.1719	20.8459	7.07362	12.4698	10.4931
chr14:72178025:72179288	chr14	72178025	72179288	.	1264	0.673884	5.19936	1.00014e-06	5.42533e-05	41.6466	32.3293	32.071	21.1268	20.9562	24.5541
chr14:72996628:72997145	chr14	72996628	72997145	.	518	1.65318	2.41707	4.30342e-06	0.00017071	13.6325	16.1911	14.2604	6.93979	3.23647	3.74473
chr14:74162939:74164201	chr14	74162939	74164201	.	1263	1.02268	4.51129	6.36347e-09	9.66078e-07	24.1437	26.5621	20.827	13.0114	11.2828	10.8905
chr14:74514762:74515449	chr14	74514762	74515449	.	688	2.36346	1.7495	2.54219e-06	0.000113284	6.0651	4.66866	11.5224	1.74167	1.46206	1.02525
chr14:74528187:74529731	chr14	74528187	74529731	.	1545	1.06828	2.94497	0.000201519	0.00332178	7.37535	7.73846	4.19809	2.54833	3.90639	2.7393
chr14:75790186:75790653	chr14	75790186	75790653	.	468	1.1218	2.64387	0.000388805	0.00546428	17.4895	21.3526	13.0891	6.21813	10.7468	6.78241
chr14:76235370:76235877	chr14	76235370	76235877	.	508	2.16805	2.10448	4.33716e-07	2.85225e-05	13.5849	10.8895	13.8318	4.38063	2.97017	1.04139
chr14:76330688:76331225	chr14	76330688	76331225	.	538	1.03807	3.14169	8.99965e-05	0.00179631	23.2683	22.5546	17.7489	9.22726	11.2182	10.4888
chr14:76434932:76435190	chr14	76434932	76435190	.	259	1.82899	1.44591	0.000713658	0.0086381	16.7308	8.2678	18.0864	2.64373	2.58918	6.8086
chr14:78104896:78105550	chr14	78104896	78105550	.	655	1.59316	1.84303	0.000364198	0.00519918	7.35077	9.53531	5.50131	3.3975	1.02381	2.96148
chr14:79219135:79219520	chr14	79219135	79219520	.	386	1.86803	1.65793	0.000131128	0.00239728	11.2261	10.1705	13.0692	3.10433	4.34325	1.82739
chr14:79485190:79485746	chr14	79485190	79485746	.	557	1.13925	3.79738	3.61839e-07	2.46363e-05	27.3729	28.8334	44.6377	15.3664	15.6513	14.5633
chr14:80682524:80682780	chr14	80682524	80682780	.	257	4.72933	0.490834	1.25077e-05	0.000388872	8.74274	7.63779	7.71147	0.666076	0	0
chr14:80777272:80777622	chr14	80777272	80777622	.	351	2.87756	0.878284	0.000133463	0.00243354	5.94414	7.11753	9.75268	2.43848	0	0.502401
chr14:80891798:80892513	chr14	80891798	80892513	.	716	1.87469	2.89285	3.90331e-09	6.47875e-07	15.9147	13.9567	16.8593	4.78161	5.38538	2.46289
chr14:88812359:88813094	chr14	88812359	88813094	.	736	1.16905	2.58904	0.000263896	0.0040772	11.7752	8.97082	11.2605	4.88426	5.69461	3.59394
chr14:88818201:88819270	chr14	88818201	88819270	.	1070	1.03334	3.59056	9.67003e-06	0.000318721	17.9991	13.175	12.797	7.99914	5.79722	7.7459
chr14:91141552:91142171	chr14	91141552	91142171	.	620	0.937293	3.91815	5.6312e-06	0.000211007	28.7332	32.5233	32.8371	14.0811	16.4945	18.4875
chr14:91585689:91586742	chr14	91585689	91586742	.	1054	0.749462	3.97529	0.000252612	0.00393848	14.7701	21.8402	18.4612	8.77021	9.06643	14.8904
chr14:92446197:92446981	chr14	92446197	92446981	.	785	1.81232	2.32272	1.31254e-06	6.7008e-05	7.36013	10.4567	10.0986	2.61679	2.77636	2.47104
chr14:95038249:95038733	chr14	95038249	95038733	.	485	1.68303	1.85512	0.000169599	0.00291401	9.92733	5.8869	15.2307	3.52952	2.41968	3.63593
chr14:100345658:100346322	chr14	100345658	100346322	.	665	1.45105	3.17015	1.67099e-07	1.31742e-05	20.0313	19.5889	17.6104	5.14832	9.07576	6.62943
chr14:101467293:101468230	chr14	101467293	101468230	.	938	0.848095	4.57863	6.01295e-07	3.66589e-05	26.3494	32.3411	38.4153	20.0746	17.5156	16.1679
chr14:102486833:102487332	chr14	102486833	102487332	.	500	0.988965	3.34671	6.21055e-05	0.00134779	28.8885	23.9118	25.5839	13.0098	13.0767	13.402
chr14:102621514:102621995	chr14	102621514	102621995	.	482	1.02025	2.86319	0.000401625	0.00558635	15.3166	21.1026	21.68	9.94416	9.04333	9.51226
chr14:103993597:103994385	chr14	103993597	103994385	.	789	0.910853	4.18056	2.0014e-06	9.40766e-05	32.5459	23.0691	32.654	15.8381	16.5737	14.5276
chr14:104107185:104107976	chr14	104107185	104107976	.	792	0.767266	3.94035	0.000140794	0.00253195	21.0747	27.2627	23.4309	15.562	12.2774	14.2499
chr15:25637382:25637827	chr15	25637382	25637827	.	446	1.74423	1.84437	9.3794e-05	0.00185186	8.99618	14.4038	10.5031	3.07052	4.13485	2.76771
chr15:25661635:25662387	chr15	25661635	25662387	.	753	1.18856	2.60263	0.000213286	0.00347447	11.9356	7.82037	11.9633	3.86466	5.78869	4.21536
chr15:26035263:26035874	chr15	26035263	26035874	.	612	1.78928	2.27192	3.28126e-06	0.000137805	9.44069	15.1621	9.71494	2.51738	2.73937	4.61027
chr15:27467107:27468446	chr15	27467107	27468446	.	1340	1.21783	4.18883	1.8671e-09	3.52876e-07	16.648	14.9149	24.605	7.79259	8.25736	8.02754
chr15:29962639:29964010	chr15	29962639	29964010	.	1372	0.794993	4.42249	8.88004e-06	0.000298266	21.9916	17.4285	19.0411	12.2273	7.82038	13.7527
chr15:29977764:29978379	chr15	29977764	29978379	.	616	1.64046	2.47122	3.49888e-06	0.000145622	11.4637	13.9049	13.1616	2.22314	4.62669	5.43914
chr15:31246280:31247063	chr15	31246280	31247063	.	784	1.44216	1.91712	0.000801174	0.00940851	8.80248	5.23504	5.05573	0.873375	2.99374	3.14898
chr15:31734916:31735305	chr15	31734916	31735305	.	390	1.47879	2.65985	7.1145e-06	0.000252741	20.9874	21.9627	24.9463	12.7289	4.2987	7.23457
chr15:32976174:32976792	chr15	32976174	32976792	.	619	0.938172	3.07801	0.000452293	0.00610508	16.0751	16.4321	19.2102	7.46672	9.20853	10.2558
chr15:33212319:33212703	chr15	33212319	33212703	.	385	2.02792	1.78057	1.91322e-05	0.000539809	16.6745	9.73345	12.1672	4.44627	2.17726	2.7482
chr15:33323524:33323977	chr15	33323524	33323977	.	454	1.29242	2.28762	0.000330356	0.00482122	12.0192	15.7222	15.0801	6.03283	7.01616	4.27262
chr15:34144599:34145162	chr15	34144599	34145162	.	564	1.5452	2.24281	3.41151e-05	0.000850084	11.9515	10.7574	12.139	3.64216	4.16151	4.06464
chr15:34152901:34153544	chr15	34152901	34153544	.	644	2.13042	2.40814	2.41098e-08	2.85938e-06	13.2082	11.0836	13.4287	3.72134	1.56195	3.28589
chr15:35825251:35825711	chr15	35825251	35825711	.	461	1.21005	2.91837	3.02241e-05	0.0007778	25.066	24.3864	16.0236	10.3971	9.45528	8.41549
chr15:35833081:35833445	chr15	35833081	35833445	.	365	1.32039	2.16012	0.000485148	0.00644449	19.347	13.2002	15.7955	5.62789	5.97107	7.73009
chr15:35982975:35983510	chr15	35982975	35983510	.	536	3.82999	1.62086	2.63976e-09	4.61326e-07	7.1862	11.9852	9.74789	0.319369	1.56389	0
chr15:36402037:36402599	chr15	36402037	36402599	.	563	0.888787	3.48503	0.000216362	0.00350402	32.7825	23.7717	18.2408	15.8107	13.4	11.2759
chr15:37203366:37204253	chr15	37203366	37204253	.	888	0.604694	4.36027	0.000445532	0.00603849	25.4835	28.7363	28.202	17.9278	18.1243	18.0712
chr15:38346741:38347076	chr15	38346741	38347076	.	336	2.33634	2.1777	5.41211e-08	5.43404e-06	12.8967	21.7747	28.4194	5.60416	1.99583	4.72347
chr15:39932053:39933009	chr15	39932053	39933009	.	957	1.09379	2.84523	0.000198841	0.00328936	12.0746	8.76383	8.28359	4.6507	3.50364	5.52799
chr15:41038658:41039126	chr15	41038658	41039126	.	469	1.18465	2.64539	0.000167177	0.00288003	17.4522	17.1217	18.0552	9.8548	5.71938	7.51995
chr15:41940875:41941331	chr15	41940875	41941331	.	457	1.0449	2.75747	0.000703262	0.00855706	15.101	25.3808	16.5581	10.4881	4.76902	12.3479
chr15:44203430:44204077	chr15	44203430	44204077	.	648	0.650385	5.4118	5.23316e-07	3.30719e-05	82.9703	67.4682	88.4158	54.1547	52.7785	45.1742
chr15:44219506:44219878	chr15	44219506	44219878	.	373	1.45623	2.10872	0.000199455	0.00329481	11.6174	18.658	16.9058	6.88398	4.94408	5.20046
chr15:44235625:44236283	chr15	44235625	44236283	.	659	2.38914	1.43344	2.71032e-05	0.00071228	4.62723	8.93587	4.64773	1.03904	1.0176	1.33796
chr15:44449631:44451107	chr15	44449631	44451107	.	1477	0.624019	5.50899	8.41472e-07	4.76972e-05	37.0533	36.6075	37.6926	19.0073	24.858	28.4154
chr15:44728133:44728998	chr15	44728133	44728998	.	866	1.3185	2.0896	0.000747288	0.00895991	5.00379	7.21204	7.28162	2.17436	1.93591	3.66532
chr15:45932723:45934078	chr15	45932723	45934078	.	1356	1.18323	3.13311	1.30097e-05	0.000401341	7.10141	9.73824	9.16784	3.02976	3.95633	4.42157
chr15:48251999:48252670	chr15	48251999	48252670	.	672	2.65945	1.31744	1.75428e-05	0.000503358	6.68716	4.51427	5.36214	0.254734	1.74635	0.52483
chr15:48368752:48369141	chr15	48368752	48369141	.	390	1.70163	1.71247	0.000289311	0.00436737	8.64187	10.9813	15.245	3.95034	3.00909	3.61729
chr15:48378226:48379407	chr15	48378226	48379407	.	1182	2.20599	2.62208	7.83992e-10	1.76602e-07	6.65321	9.0582	8.6883	1.88271	1.27652	2.08866
chr15:48653139:48653493	chr15	48653139	48653493	.	355	2.92072	1.08746	2.3722e-05	0.000641151	7.68552	8.04266	11.1653	1.92881	0.472252	0.99348
chr15:48785428:48786142	chr15	48785428	48786142	.	715	1.77865	3.69181	1.62886e-12	1.24521e-09	27.3846	22.7114	31.7499	8.85835	6.33082	8.63216
chr15:48858125:48858682	chr15	48858125	48858682	.	558	2.59294	0.854535	0.000374036	0.00530363	4.3143	5.75634	3.5517	0.306777	0.300447	1.58013
chr15:48919294:48920006	chr15	48919294	48920006	.	713	1.33649	2.94691	5.69277e-06	0.000212795	11.93	12.7641	19.9625	4.32155	6.58371	6.67778
chr15:48987127:48987968	chr15	48987127	48987968	.	842	1.63307	1.95451	0.000101211	0.00196805	5.71824	6.56989	6.84724	2.03304	2.3893	1.67547
chr15:51176760:51177890	chr15	51176760	51177890	.	1131	1.26611	3.04176	1.04789e-05	0.00034021	7.23703	10.5711	11.9475	6.05417	2.96462	3.27427
chr15:52166438:52168021	chr15	52166438	52168021	.	1584	0.761914	5.07099	1.10214e-07	9.52489e-06	27.6605	25.6855	25.9333	14.4813	18.0985	14.1386
chr15:52170762:52171725	chr15	52170762	52171725	.	964	1.95846	1.45998	0.000281482	0.00427429	4.66159	3.14688	4.11172	1.59817	0.869551	0.548784
chr15:52176843:52177420	chr15	52176843	52177420	.	578	1.2092	2.82402	5.15542e-05	0.0011712	17.2154	17.9064	13.7152	9.18102	6.09107	5.79673
chr15:52700679:52701625	chr15	52700679	52701625	.	947	0.709311	4.25387	0.000167247	0.00288003	28.6411	22.4236	22.4497	10.1227	14.5166	20.4833
chr15:52775943:52776731	chr15	52775943	52776731	.	789	1.22144	2.64417	0.000138691	0.002506	10.374	12.2131	8.90564	6.07489	4.88712	2.45852
chr15:57109114:57110171	chr15	57109114	57110171	.	1058	0.634797	4.69848	4.58358e-05	0.0010675	31.2489	29.6849	27.4169	18.7685	19.8073	18.3343
chr15:59524549:59525178	chr15	59524549	59525178	.	630	0.83479	4.52263	1.11379e-06	5.89431e-05	44.3263	42.7705	51.1906	21.1939	26.0788	30.2302
chr15:60654679:60655685	chr15	60654679	60655685	.	1007	1.03652	3.25076	5.55246e-05	0.00123988	10.5188	11.8728	14.4922	5.26974	5.82694	6.82956
chr15:60699292:60700116	chr15	60699292	60700116	.	825	0.958769	5.65042	1.26557e-13	1.37196e-10	88.1246	73.7579	77.5268	40.8761	38.0005	44.4597
chr15:60719143:60719798	chr15	60719143	60719798	.	656	0.814588	3.71262	0.000204949	0.00336872	20.3061	26.3862	28.0139	13.8302	16.8672	11.5591
chr15:62402472:62403212	chr15	62402472	62403212	.	741	0.756951	4.17952	6.6961e-05	0.00142814	34.4375	31.7881	24.071	22.1774	15.3848	15.9446
chr15:62404980:62405798	chr15	62404980	62405798	.	819	0.761676	4.47893	1.18938e-05	0.000373728	31.9416	41.8336	27.4982	21.7373	21.0841	16.7945
chr15:62411246:62412208	chr15	62411246	62412208	.	963	0.632633	4.89169	1.92081e-05	0.000541512	36.6648	32.428	42.0953	24.7085	22.8059	24.1716
chr15:62761895:62762794	chr15	62761895	62762794	.	900	1.10852	4.42697	2.53455e-09	4.4859e-07	24.7871	36.879	35.0327	14.8357	12.8531	17.0465
chr15:63041619:63041966	chr15	63041619	63041966	.	348	2.42646	1.02445	0.000267949	0.00412294	10.146	8.20444	6.21269	1.4757	1.927	1.01346
chr15:63062652:63063262	chr15	63062652	63063262	.	611	1.06361	2.85404	0.000308148	0.00458203	14.7096	11.6823	19.4617	7.84466	9.05471	4.90643
chr15:63145584:63146011	chr15	63145584	63146011	.	428	0.906995	3.30951	0.000322615	0.00473341	28.1236	26.2667	33.2553	14.3985	11.3594	21.0128
chr15:63630220:63630867	chr15	63630220	63630867	.	648	1.42351	2.41306	8.00396e-05	0.00164831	14.1173	7.43527	11.9556	6.60423	1.81103	4.08201
chr15:65361412:65361895	chr15	65361412	65361895	.	484	2.31889	1.47668	3.63996e-05	0.000888913	8.28987	10.692	6.32821	3.18313	0.692766	1.09303
chr15:65637257:65637785	chr15	65637257	65637785	.	529	1.18995	2.60331	0.000181359	0.00307044	16.0795	15.1798	13.9639	6.47189	7.60602	5.66697
chr15:66209106:66209935	chr15	66209106	66209935	.	830	2.54754	2.11114	9.40777e-09	1.31861e-06	10.635	6.23488	7.59744	1.4437	1.41391	1.27477
chr15:68644848:68645186	chr15	68644848	68645186	.	339	1.59479	1.88828	0.000224156	0.00359716	14.6762	18.4237	11.6923	4.03968	4.45087	6.24222
chr15:69286269:69286922	chr15	69286269	69286922	.	654	0.750178	4.37052	2.03212e-05	0.000567586	33.129	41.201	42.9758	24.3423	22.302	22.9192
chr15:71084098:71084994	chr15	71084098	71084994	.	897	1.09019	3.99458	1.19573e-07	1.01542e-05	25.5857	23.8725	21.4916	11.8319	9.5319	11.9921
chr15:71144771:71145248	chr15	71144771	71145248	.	478	1.14849	2.84091	0.00010159	0.0019724	15.4448	22.7725	21.1075	9.31113	7.01462	10.3297
chr15:71148830:71149648	chr15	71148830	71149648	.	819	1.02385	3.9548	8.22498e-07	4.6917e-05	25.6709	23.3135	25.5183	12.3318	14.7384	9.47385
chr15:72632078:72632665	chr15	72632078	72632665	.	588	1.47095	2.67732	4.08528e-06	0.000163931	15.2849	15.781	14.4012	6.11363	5.70236	4.49854
chr15:73981436:73981948	chr15	73981436	73981948	.	513	0.805128	3.61151	0.000334868	0.00487273	30.3464	25.393	32.662	14.6822	16.9937	18.9061
chr15:74222606:74223226	chr15	74222606	74223226	.	621	1.33126	2.5564	7.65114e-05	0.00158838	12.6636	9.77002	15.9569	7.99399	4.0495	3.12362
chr15:74233121:74233944	chr15	74233121	74233944	.	824	1.43521	3.78967	5.91582e-10	1.41531e-07	25.1255	21.223	25.3635	7.06332	8.54524	10.9144
chr15:74471355:74472229	chr15	74471355	74472229	.	875	0.677867	4.46129	8.64058e-05	0.00174218	27.6963	34.0578	29.8564	15.064	18.2019	23.9826
chr15:74943469:74944325	chr15	74943469	74944325	.	857	0.677238	4.14883	0.000344695	0.00497399	26.9671	22.488	25.438	20.1743	13.498	13.1691
chr15:75400254:75401185	chr15	75400254	75401185	.	932	0.858696	3.263	0.000846787	0.00980966	11.3653	8.80745	18.3648	7.34685	7.01537	6.81152
chr15:75992584:75993145	chr15	75992584	75993145	.	562	1.27474	3.81321	1.19706e-08	1.588e-06	36.2677	29.2119	38.1494	14.9251	12.8273	15.0613
chr15:76239337:76239887	chr15	76239337	76239887	.	551	1.9221	2.82245	4.34029e-09	7.01934e-07	21.8455	17.1646	18.9651	6.21349	6.08528	2.88037
chr15:78183111:78183729	chr15	78183111	78183729	.	619	1.1358	2.54936	0.000477859	0.0063684	12.7045	12.9727	11.0604	4.14818	4.8751	7.69185
chr15:80937914:80938457	chr15	80937914	80938457	.	544	1.04188	3.19907	8.30216e-05	0.00169662	21.8316	15.0892	28.8136	11.0135	11.0944	9.72478
chr15:81528353:81528932	chr15	81528353	81528932	.	580	1.48477	3.17515	9.74949e-08	8.6278e-06	17.7094	23.998	24.8508	6.78824	9.82772	6.9929
chr15:83544175:83544769	chr15	83544175	83544769	.	595	0.876835	4.17788	3.80189e-06	0.000155988	42.618	35.6893	37.5476	18.7005	24.5134	19.8571
chr15:83611387:83612145	chr15	83611387	83612145	.	759	1.22759	3.06533	1.31068e-05	0.000403956	11.8413	14.5767	18.2779	8.79589	5.52205	4.64671
chr15:83956418:83956860	chr15	83956418	83956860	.	443	4.0579	1.00894	9.21571e-07	5.07047e-05	4.34741	11.2788	6.1005	0	0.756882	0.398065
chr15:85339984:85340971	chr15	85339984	85340971	.	988	1.24549	2.32493	0.000701592	0.00854123	8.93426	3.25105	7.65896	2.42565	1.69686	4.28363
chr15:85861241:85862195	chr15	85861241	85862195	.	955	1.89464	2.14324	4.33475e-06	0.000171658	6.89022	6.72678	6.60301	0.537743	2.63324	2.21582
chr15:85900710:85902128	chr15	85900710	85902128	.	1419	0.749714	4.84661	1.22455e-06	6.34068e-05	22.5073	23.5162	29.4566	16.0445	12.5235	16.2797
chr15:87406333:87406876	chr15	87406333	87406876	.	544	0.7919	3.69178	0.000272828	0.00416678	31.8623	28.5383	27.4889	15.4189	18.7989	16.5321
chr15:87751037:87751735	chr15	87751037	87751735	.	699	2.73646	1.88673	2.80239e-08	3.21371e-06	9.41368	7.91394	7.73253	0.734685	1.19921	1.76595
chr15:88152551:88153246	chr15	88152551	88153246	.	696	2.05836	2.58592	9.63534e-09	1.33968e-06	17.525	8.71722	12.9431	3.19736	2.89051	3.29376
chr15:88474733:88475208	chr15	88474733	88475208	.	476	3.07766	1.20024	6.9617e-06	0.000248842	5.73185	7.87264	8.7056	0.71925	1.76102	0
chr15:88662049:88662549	chr15	88662049	88662549	.	501	1.4862	2.36304	3.16722e-05	0.000805801	12.173	14.9596	15.4635	5.80856	3.68092	5.6317
chr15:88921595:88922033	chr15	88921595	88922033	.	439	2.6371	0.709814	0.00055436	0.00714499	4.7526	5.69078	4.92486	0.389935	1.14567	0.803384
chr15:89611063:89611931	chr15	89611063	89611931	.	869	1.15762	3.53914	2.25314e-06	0.000103305	23.0857	18.6866	11.8177	7.09153	9.45319	7.50826
chr15:90364155:90364849	chr15	90364155	90364849	.	695	1.40502	2.14455	0.000239378	0.00377456	7.62047	9.75679	8.2955	3.20196	3.61833	2.79104
chr15:90865851:90866543	chr15	90865851	90866543	.	693	0.754706	3.57928	0.000843	0.00977559	22.2326	22.6599	18.1988	14.8209	11.6121	10.9419
chr15:90879854:90880268	chr15	90879854	90880268	.	415	1.85638	2.06882	9.30051e-06	0.000309333	12.3753	13.3297	18.2339	6.59977	2.42385	2.97446
chr15:91223638:91224028	chr15	91223638	91224028	.	391	1.8682	2.17176	4.35077e-06	0.0001719	17.65	12.7788	19.8139	5.69146	1.71508	6.31406
chr15:91891987:91892440	chr15	91891987	91892440	.	454	2.04882	1.44877	0.00023127	0.00367847	7.42363	5.1097	13.0959	1.13116	1.10782	3.8842
chr15:92433620:92434294	chr15	92433620	92434294	.	675	0.990251	2.8277	0.000666967	0.00821366	15.6925	12.6895	11.4774	7.35447	7.20271	5.48622
chr15:93451003:93451644	chr15	93451003	93451644	.	642	0.611547	4.73297	7.3126e-05	0.00153	46.9976	46.6963	54.7239	34.6629	31.8586	30.4892
chr15:94010552:94010836	chr15	94010552	94010836	.	285	2.26297	1.67496	1.0341e-05	0.000336361	11.8257	12.5226	25.9189	4.8051	1.76473	3.71248
chr15:94368668:94369394	chr15	94368668	94369394	.	727	1.5363	3.18251	9.97778e-08	8.78501e-06	24.5043	16.691	12.1434	3.53194	7.37934	7.51943
chr15:94717519:94718180	chr15	94717519	94718180	.	662	1.20206	2.34413	0.0006151	0.00773249	10.4247	7.00848	12.5192	4.13732	4.3052	4.52844
chr15:95795393:95796020	chr15	95795393	95796020	.	628	0.765038	3.67762	0.000624128	0.00780779	22.4893	21.0271	31.5581	10.9033	14.6827	18.5328
chr15:95844054:95844715	chr15	95844054	95844715	.	662	1.06949	2.57033	0.000770973	0.00916392	11.6369	9.9736	12.7914	5.17165	5.31818	5.86033
chr15:96228028:96228561	chr15	96228028	96228561	.	534	1.80626	1.5526	0.000408191	0.00565728	5.10929	8.02007	9.7844	2.88508	1.2558	2.31161
chr15:96590721:96591165	chr15	96590721	96591165	.	445	1.67132	2.10882	3.47238e-05	0.000859486	10.8197	14.4361	15.79	2.30807	4.14414	6.34041
chr15:99246443:99246801	chr15	99246443	99246801	.	359	1.70422	1.59576	0.000752651	0.00900947	5.36463	12.9237	16.5614	5.24512	3.73592	1.47362
chr15:100076717:100077367	chr15	100076717	100077367	.	651	0.976589	5.24547	1.11782e-11	6.27385e-09	68.2891	79.4923	82.1965	39.4428	33.7359	43.6116
chr15:100191145:100191982	chr15	100191145	100191982	.	838	1.00454	3.10712	0.000183779	0.00309887	15.896	11.4989	12.0399	7.96668	5.40159	6.31299
chr15:102335650:102336097	chr15	102335650	102336097	.	448	1.23998	2.22929	0.000858437	0.00991813	10.7472	13.9411	16.4886	6.11363	2.99374	8.26607
chr16:13635356:13635907	chr16	13635356	13635907	.	552	2.56437	1.90066	2.08642e-07	1.58723e-05	8.72238	11.6378	11.4237	0.620223	3.94826	0.638923
chr16:19822849:19823090	chr16	19822849	19823090	.	242	1.47994	2.77914	2.03207e-06	9.53889e-05	37.1386	42.7682	39.4583	9.90307	15.2409	17.4885
chr16:27558217:27558940	chr16	27558217	27558940	.	724	1.30688	3.61765	4.6972e-08	4.84643e-06	27.7092	20.9502	21.65	11.3491	9.2624	7.79415
chr16:28647484:28648219	chr16	28647484	28648219	.	736	1.03095	3.37148	4.96847e-05	0.00113766	11.5572	24.4879	19.0939	9.76851	8.88359	8.14627
chr16:29283419:29283707	chr16	29283419	29283707	.	289	0.974092	2.95145	0.000464096	0.00623286	38.8734	29.6382	33.0412	17.7697	16.2428	17.6953
chr16:29518444:29518981	chr16	29518444	29518981	.	538	1.24322	2.66228	7.98643e-05	0.00164567	17.8987	16.2526	12.7256	5.0909	7.7904	6.88327
chr16:31063380:31063922	chr16	31063380	31063922	.	543	1.38316	3.31472	1.18399e-07	1.00792e-05	26.6009	25.9618	24.2215	10.088	10.4974	8.76842
chr16:31076236:31076845	chr16	31076236	31076845	.	610	2.4521	1.96346	1.33299e-07	1.10625e-05	10.261	9.65367	9.74679	0.841877	3.02319	1.44543
chr16:31276526:31277115	chr16	31276526	31277115	.	590	1.23231	3.03854	1.33497e-05	0.00040928	22.3056	15.1226	18.6275	11.0253	6.25133	6.57549
chr16:31397436:31398294	chr16	31397436	31398294	.	859	0.867873	5.1449	3.17036e-09	5.43109e-07	54.9297	49.0261	54.1133	35.0733	21.8588	29.7668
chr16:48590628:48591253	chr16	48590628	48591253	.	626	1.48511	2.05672	0.000194105	0.00322795	8.71681	10.2621	8.05863	3.82834	3.21373	2.53528
chr16:51427157:51427774	chr16	51427157	51427774	.	618	0.918906	4.46359	3.47522e-07	2.38252e-05	35.0589	52.841	50.4354	24.0984	19.532	29.3905
chr16:53855497:53856353	chr16	53855497	53856353	.	857	0.93489	3.07734	0.00056612	0.00726552	12.5472	8.95356	15.7673	5.99235	5.67308	7.81916
chr16:53927805:53928492	chr16	53927805	53928492	.	688	0.997111	2.91694	0.000414259	0.00571625	13.2966	12.4498	16.2361	7.71312	6.09191	7.17674
chr16:54060821:54061690	chr16	54060821	54061690	.	870	1.01321	2.90751	0.000387322	0.00544858	8.67025	13.5373	10.9758	5.31253	6.35911	4.66193
chr16:54495888:54497056	chr16	54495888	54497056	.	1169	0.904384	3.95152	8.35108e-06	0.000285942	16.8866	15.5702	18.1863	8.20032	9.035	9.8052
chr16:55505152:55505975	chr16	55505152	55505975	.	824	1.26174	2.38075	0.000344426	0.00497218	5.84315	11.0446	8.30872	4.77813	2.4415	3.21012
chr16:55549160:55549481	chr16	55549160	55549481	.	322	1.91469	1.56328	0.000187935	0.0031495	11.9621	15.5171	11.1906	3.72134	4.68585	1.64294
chr16:56470169:56470817	chr16	56470169	56470817	.	649	1.78026	3.32349	1.25257e-10	4.23918e-08	24.2345	21.7215	23.3191	8.17662	5.42471	6.52115
chr16:56643038:56644470	chr16	56643038	56644470	.	1433	0.787866	3.85646	0.000189655	0.00317143	13.1037	14.9432	9.42959	5.97284	6.90252	8.86021
chr16:57105976:57106666	chr16	57105976	57106666	.	691	1.77402	2.36859	1.8704e-06	8.9372e-05	10.9162	8.00556	13.5582	1.98184	4.36713	3.06239
chr16:57999977:58000603	chr16	57999977	58000603	.	627	1.2194	2.71099	7.89688e-05	0.00163013	13.3103	11.6688	16.6663	6.00637	5.08028	6.74996
chr16:58400067:58400983	chr16	58400067	58400983	.	917	0.681841	3.99868	0.000466507	0.00625677	20.6522	19.2652	23.1841	12.6939	13.8946	12.6921
chr16:58485794:58486210	chr16	58485794	58486210	.	417	0.913592	3.33594	0.000313351	0.00463347	32.3293	28.6713	30.6761	23.3989	9.64888	15.6467
chr16:64446705:64447073	chr16	64446705	64447073	.	369	1.4728	1.80665	0.000829028	0.00965229	13.918	10.6391	13.183	4.17516	4.08901	5.25683
chr16:66963954:66964667	chr16	66963954	66964667	.	714	1.1916	2.93978	3.28663e-05	0.000828885	12.138	17.4948	13.3738	7.1925	6.10488	5.43353
chr16:67125918:67126477	chr16	67125918	67126477	.	560	3.09071	1.77053	2.35096e-08	2.80369e-06	10.6039	7.96637	10.9388	2.13977	1.1975	0
chr16:67278152:67279031	chr16	67278152	67279031	.	880	1.00333	4.28622	7.80664e-08	7.2799e-06	31.7336	28.3892	27.0252	12.4496	16.0029	15.0292
chr16:67345401:67346283	chr16	67345401	67346283	.	883	0.80887	4.72508	7.37346e-07	4.30615e-05	29.99	42.6413	40.6041	22.682	24.4924	17.1749
chr16:67440572:67440970	chr16	67440572	67440970	.	399	1.43516	1.94505	0.000674554	0.00829	10.8603	8.05022	19.8681	6.00637	3.78156	4.41962
chr16:67575338:67576210	chr16	67575338	67576210	.	873	0.973635	2.97926	0.000580593	0.0074114	11.5819	11.2423	11.5572	8.82379	5.18503	3.43394
chr16:70263327:70263960	chr16	70263327	70263960	.	634	0.778072	3.80329	0.000246563	0.00386153	30.377	22.2355	28.7018	14.3101	14.0149	19.1919
chr16:70467475:70468231	chr16	70467475	70468231	.	757	1.30086	2.4867	0.000139569	0.0025171	12.5086	9.9006	7.14008	4.52263	5.09371	2.32949
chr16:72863825:72864095	chr16	72863825	72864095	.	271	3.38737	0.809231	3.36039e-05	0.000843168	7.10665	13.828	7.97792	0	0.618632	1.95213
chr16:72917827:72918693	chr16	72917827	72918693	.	867	0.980865	2.90569	0.000551849	0.00712317	10.3663	9.8794	12.6762	6.91044	4.83418	4.88146
chr16:73019108:73019636	chr16	73019108	73019636	.	529	1.41129	2.31305	0.000125911	0.00232209	18.2032	10.4572	9.19572	4.53033	6.65527	3.00016
chr16:74602916:74603411	chr16	74602916	74603411	.	496	1.60381	2.06009	9.07274e-05	0.00180571	8.73645	12.9518	13.4399	1.72562	4.39404	5.33295
chr16:77840712:77841247	chr16	77840712	77841247	.	536	1.70666	1.8206	0.000205228	0.00337171	8.08448	8.98891	10.4202	5.42927	1.25111	1.64499
chr16:84511745:84512489	chr16	84511745	84512489	.	745	0.845021	3.41594	0.000415456	0.00572821	18.3111	15.3296	19.8306	8.96118	9.90144	10.8883
chr16:86618727:86619557	chr16	86618727	86619557	.	831	0.752167	3.6523	0.000665651	0.00820008	21.4375	18.2527	15.6102	11.1237	9.48197	12.3079
chr16:86623940:86624617	chr16	86623940	86624617	.	678	0.723613	4.93499	1.05508e-06	5.65698e-05	52.077	52.1127	62.7133	35.5997	35.1124	30.1707
chr16:86713668:86714313	chr16	86713668	86714313	.	646	1.85256	3.13693	3.17421e-10	8.63634e-08	17.8876	22.9273	20.9173	4.76977	6.7475	5.45953
chr16:87996891:87997425	chr16	87996891	87997425	.	535	0.707497	3.77172	0.00083811	0.0097319	33.8983	30.0191	28.6248	20.4778	21.3087	14.8326
chr16:88278924:88279523	chr16	88278924	88279523	.	600	0.87066	4.07163	1.96935e-05	0.000553171	41.1929	41.0427	24.0224	18.2594	14.809	25.2758
chr16:89430965:89431874	chr16	89430965	89431874	.	910	0.997439	2.9044	0.000563885	0.00724354	14.6383	8.0399	8.51343	5.83146	4.05306	5.8135
chr17:2099073:2099459	chr17	2099073	2099459	.	387	1.02458	2.81961	0.000576508	0.00737395	24.8825	23.9773	20.9498	9.28892	7.79765	17.3153
chr17:4752011:4752902	chr17	4752011	4752902	.	892	2.37496	1.43094	3.04271e-05	0.000781606	4.85794	4.00104	4.4436	0.76763	0.375895	1.38386
chr17:8262917:8263782	chr17	8262917	8263782	.	866	0.873436	3.50852	0.000182922	0.00309013	15.1967	17.3089	17.0598	8.69745	7.74362	10.5887
chr17:9175243:9175622	chr17	9175243	9175622	.	380	1.23976	3.46712	1.18869e-06	6.20552e-05	40.123	35.2197	43.6196	20.722	8.38247	21.3468
chr17:11944578:11945120	chr17	11944578	11945120	.	543	1.12987	2.56323	0.000471057	0.00630681	13.8916	12.1593	16.2583	4.72877	8.33616	6.17037
chr17:13265750:13266627	chr17	13265750	13266627	.	878	1.02521	4.6214	2.01806e-09	3.7537e-07	37.1069	35.9739	38.1677	18.327	15.0846	21.2897
chr17:13319152:13319768	chr17	13319152	13319768	.	617	2.26208	1.33918	0.000104474	0.00201289	4.16186	4.91668	8.76019	1.38721	0.815151	1.42903
chr17:13695632:13695981	chr17	13695632	13695981	.	350	3.34748	0.78348	3.43125e-05	0.000853568	7.33677	8.15756	6.17719	0.48909	0.478998	1.00767
chr17:13834298:13835669	chr17	13834298	13835669	.	1372	0.936316	4.38068	2.82012e-07	2.04451e-05	19.5351	17.0383	22.324	8.35945	12.4637	9.89679
chr17:14641350:14642464	chr17	14641350	14642464	.	1115	1.28099	2.37892	0.000440043	0.00598749	9.35602	4.80125	4.20123	2.60994	1.05251	3.95387
chr17:15295504:15296326	chr17	15295504	15296326	.	823	1.16541	3.89757	9.62113e-08	8.54692e-06	25.7411	27.1031	20.5781	14.5598	9.98155	8.14219
chr17:15372525:15373120	chr17	15372525	15373120	.	596	1.14942	3.10984	2.80709e-05	0.00073177	19.6576	17.9644	19.9515	12.3503	7.31356	6.21342
chr17:15750804:15751670	chr17	15750804	15751670	.	867	1.52643	2.39328	1.78929e-05	0.000511079	8.33002	8.85029	8.10444	2.17185	2.51377	4.06788
chr17:16891429:16892158	chr17	16891429	16892158	.	730	2.1673	1.53469	4.79997e-05	0.00110749	6.15585	4.15561	6.91055	1.64147	0.68897	1.44939
chr17:18996230:18996892	chr17	18996230	18996892	.	663	0.881552	3.28815	0.000448052	0.00606671	15.7345	22.8778	16.8483	10.5859	10.8732	8.51126
chr17:19135512:19135812	chr17	19135512	19135812	.	301	1.52644	2.35743	2.53657e-05	0.000676536	15.9959	27.2709	28.1325	6.25581	8.35462	9.95956
chr17:19177085:19177361	chr17	19177085	19177361	.	277	1.41987	2.19193	0.000257033	0.00399126	20.2787	13.5284	33.1717	10.5057	4.23663	10.1859
chr17:27967472:27967773	chr17	27967472	27967773	.	302	1.8655	1.52311	0.000402884	0.00559938	9.03431	11.2268	19.6872	3.96779	5.5513	1.16783
chr17:28846695:28848127	chr17	28846695	28848127	.	1433	0.750718	4.15385	8.34515e-05	0.00170224	13.7756	18.1809	13.9558	9.676	7.01951	10.583
chr17:29666876:29667725	chr17	29666876	29667725	.	850	0.64579	5.58896	2.87155e-07	2.07098e-05	62.1198	77.0469	66.7681	48.7364	34.3188	48.5461
chr17:29898163:29898913	chr17	29898163	29898913	.	751	1.61511	2.12039	8.41036e-05	0.00170866	11.54	6.65314	5.7577	2.50732	0.892939	4.4614
chr17:30488518:30489875	chr17	30488518	30489875	.	1358	1.11634	2.96006	8.36289e-05	0.00170302	6.97277	8.67266	6.89892	4.53795	2.83942	2.98666
chr17:32579176:32580293	chr17	32579176	32580293	.	1118	0.958116	4.86902	1.52397e-09	2.97839e-07	32.2993	30.0071	40.1269	15.4645	19.0442	18.139
chr17:34115144:34116420	chr17	34115144	34116420	.	1277	0.715744	3.9887	0.000337569	0.00490483	13.5733	17.4674	14.3909	8.04299	7.87703	11.7378
chr17:35533476:35534765	chr17	35533476	35534765	.	1290	1.03177	3.80695	2.51423e-06	0.00011225	12.3168	13.5564	16.8995	6.76764	8.57741	5.46799
chr17:38407624:38408396	chr17	38407624	38408396	.	773	0.854028	3.35773	0.000563805	0.00724354	20.1393	13.1584	16.0823	7.52933	8.02461	11.8626
chr17:38439555:38441292	chr17	38439555	38441292	.	1738	0.677282	4.54806	4.77947e-05	0.00110423	16.0676	14.9903	17.9339	12.4102	9.06734	9.13167
chr17:39685570:39686870	chr17	39685570	39686870	.	1301	1.11506	3.10189	3.90502e-05	0.000938774	8.14178	7.54386	10.3863	3.55258	4.63903	3.79523
chr17:39707573:39708092	chr17	39707573	39708092	.	520	0.605843	5.23594	6.03284e-06	0.000222637	99.3815	77.2125	83.1545	54.6464	60.2893	55.9549
chr17:40588282:40589154	chr17	40588282	40589154	.	873	0.710142	4.00717	0.000404879	0.00562382	17.8324	20.645	28.8929	14.3142	15.9392	10.7058
chr17:40624904:40625540	chr17	40624904	40625540	.	637	1.40075	3.31294	1.00895e-07	8.85851e-06	24.943	19.0492	21.4957	7.25573	9.2115	8.305
chr17:41418989:41419770	chr17	41418989	41419770	.	782	1.61489	3.39101	1.62297e-09	3.15411e-07	18.4709	21.4501	18.8923	6.78597	4.28771	8.11808
chr17:41594865:41595629	chr17	41594865	41595629	.	765	1.40498	2.7029	1.16504e-05	0.000367914	7.97214	13.296	14.1308	5.14664	3.06809	5.07129
chr17:44811421:44811993	chr17	44811421	44811993	.	573	1.74246	2.11534	1.50919e-05	0.000449197	10.0833	12.1456	10.0617	3.58495	4.09615	1.84652
chr17:45198148:45198434	chr17	45198148	45198434	.	287	0.966491	2.91263	0.000637738	0.00793229	38.5851	27.3577	33.2714	18.49	18.6926	13.5176
chr17:45682021:45682530	chr17	45682021	45682530	.	510	1.43824	3.68483	3.03806e-09	5.23029e-07	44.3713	26.9419	36.0336	13.7617	16.1075	9.68156
chr17:48382118:48382670	chr17	48382118	48382670	.	553	2.97584	1.12659	1.34341e-05	0.000411505	4.64352	5.4857	7.81923	0.928652	0.606327	0.637768
chr17:48408713:48409137	chr17	48408713	48409137	.	425	1.27317	2.6112	7.57795e-05	0.00157609	18.8814	17.2148	21.6202	7.65282	10.2562	5.80894
chr17:55540539:55540934	chr17	55540539	55540934	.	396	1.98081	2.97846	2.70768e-10	7.60562e-08	34.0437	27.488	29.573	9.51009	5.50364	8.01558
chr17:57022303:57022546	chr17	57022303	57022546	.	244	1.18009	2.72458	0.000122465	0.00227487	30.9144	35.8356	40.6116	11.225	17.8643	18.0679
chr17:57034348:57035055	chr17	57034348	57035055	.	708	1.16474	3.11911	1.71403e-05	0.000495497	16.7746	14.3665	17.8132	7.73702	8.28775	5.72865
chr17:57746000:57746727	chr17	57746000	57746727	.	728	2.74041	2.60816	3.91168e-12	2.63488e-09	11.6842	10.7852	19.0562	3.05681	1.8423	1.21115
chr17:59278562:59279177	chr17	59278562	59279177	.	616	1.22603	3.7167	9.33468e-08	8.3555e-06	24.2301	34.7623	28.6631	14.1725	11.7028	11.4508
chr17:59387291:59387520	chr17	59387291	59387520	.	230	2.41638	1.14352	0.00018765	0.003147	14.6536	11.6378	14.8834	0.744268	1.45782	5.36695
chr17:59402565:59403858	chr17	59402565	59403858	.	1294	1.32554	4.67585	1.75581e-13	1.79145e-10	22.8211	32.683	28.2644	11.3768	9.71693	12.265
chr17:59415029:59416138	chr17	59415029	59416138	.	1110	2.92103	2.41851	2.90302e-11	1.32508e-08	10.6995	8.1989	4.8694	0.308435	0.755177	2.06528
chr17:61510438:61511343	chr17	61510438	61511343	.	906	1.23548	2.56574	0.000161033	0.00280152	10.9829	6.89363	7.95444	3.21202	4.81113	2.91958
chr17:62261133:62261815	chr17	62261133	62261815	.	683	1.08592	3.72594	1.46511e-06	7.31817e-05	22.7931	25.0818	29.2806	9.77464	11.2912	15.2331
chr17:62619148:62619829	chr17	62619148	62619829	.	682	1.23903	3.07624	7.19457e-06	0.000255194	17.4141	14.1292	18.4923	7.78098	6.1455	7.23988
chr17:62675867:62676533	chr17	62675867	62676533	.	667	1.10571	2.95292	8.48655e-05	0.00172062	15.6401	14.7145	15.1265	6.15946	8.04315	6.87393
chr17:62925774:62926288	chr17	62925774	62926288	.	515	1.03333	3.12271	0.000118237	0.00221243	18.6981	19.0574	27.9873	11.9661	10.417	9.58757
chr17:62970219:62971166	chr17	62970219	62971166	.	948	0.754893	3.75436	0.00037589	0.00532447	16.7602	16.1882	19.3852	10.2926	10.257	10.4169
chr17:63293381:63294510	chr17	63293381	63294510	.	1130	1.3987	2.74116	9.36928e-06	0.000311173	7.81155	6.63253	10.0448	3.48423	3.85742	1.87267
chr17:64132206:64132765	chr17	64132206	64132765	.	560	2.99141	2.25801	3.44808e-11	1.46765e-08	16.909	12.1089	13.1909	0.917044	1.49687	2.83408
chr17:64360927:64361624	chr17	64360927	64361624	.	698	0.971625	3.76073	1.18038e-05	0.000371208	26.9019	24.0315	24.2633	17.6577	11.0485	9.60032
chr17:64393457:64394021	chr17	64393457	64394021	.	565	1.10615	3.16987	4.49696e-05	0.00105263	26.9853	16.7392	18.814	7.57441	13.6493	7.80278
chr17:66377085:66378084	chr17	66377085	66378084	.	1000	2.26747	1.75793	3.29822e-06	0.000138434	5.77771	4.46116	4.86454	1.19827	0.838247	1.05806
chr17:67604872:67605829	chr17	67604872	67605829	.	958	0.720761	4.09676	0.000182561	0.00308675	24.4591	18.627	22.1919	15.0097	10.325	14.3578
chr17:67669027:67669579	chr17	67669027	67669579	.	553	2.48999	1.4169	2.14032e-05	0.000590346	6.96529	6.77645	7.81923	0.928652	0.303163	2.55107
chr17:67870280:67870909	chr17	67870280	67870909	.	630	0.877445	4.16205	5.03223e-06	0.000193427	38.2123	31.4406	38.6074	22.5525	15.1683	21.2731
chr17:68252563:68253547	chr17	68252563	68253547	.	985	0.843008	4.67095	3.08876e-07	2.17783e-05	34.2165	36.414	27.6197	16.5099	16.85	21.4834
chr17:69498682:69498878	chr17	69498682	69498878	.	197	0.797653	3.56164	0.000514004	0.00672998	84.7266	61.5958	74.9938	40.8403	34.8915	51.9182
chr17:69817609:69818123	chr17	69817609	69818123	.	515	1.06375	4.58267	8.17228e-10	1.82901e-07	62.6386	67.2207	56.3244	32.242	27.0192	29.7899
chr17:74366366:74367216	chr17	74366366	74367216	.	851	1.16828	3.2256	9.54076e-06	0.000315216	11.1269	17.8237	15.2434	6.23576	6.8951	6.42377
chr17:75300469:75300893	chr17	75300469	75300893	.	425	0.973442	2.88427	0.000613478	0.0077177	19.259	25.1925	21.6202	10.8751	11.4396	11.203
chr17:78478560:78479355	chr17	78478560	78479355	.	796	1.00678	3.29701	6.50542e-05	0.00139798	17.9444	13.2266	16.5229	7.95693	7.37152	8.41837
chr18:2589079:2589675	chr18	2589079	2589675	.	597	1.05227	2.73936	0.00045513	0.00613501	15.3233	14.3475	13.2787	7.16841	7.86295	5.61225
chr18:8559674:8560319	chr18	8559674	8560319	.	646	0.898702	3.44405	0.000248493	0.00388824	18.3845	20.165	25.3797	11.3944	15.5711	7.09739
chr18:8870524:8871019	chr18	8870524	8871019	.	496	1.59043	1.74476	0.00050285	0.00663264	11.0015	8.63451	7.62808	3.45124	3.04202	2.48871
chr18:9705140:9705734	chr18	9705140	9705734	.	595	1.24239	2.23024	0.000718987	0.00869199	13.217	8.6974	8.7813	4.6032	5.07175	3.26012
chr18:9731405:9731717	chr18	9731405	9731717	.	313	1.42471	2.48718	4.28784e-05	0.0010136	18.9719	18.8139	36.2638	7.65668	12.8549	6.76074
chr18:10304734:10305265	chr18	10304734	10305265	.	532	1.57283	2.19813	6.15057e-05	0.0013377	13.5754	10.3982	11.8532	4.82655	1.26052	5.96648
chr18:10420461:10421127	chr18	10420461	10421127	.	667	1.86254	1.65832	0.000138944	0.0025091	6.73729	4.81565	8.37362	2.3098	1.25674	1.85067
chr18:10421927:10422343	chr18	10421927	10422343	.	417	1.24977	2.55223	0.000149324	0.00264221	15.7798	17.973	22.467	5.3366	7.6387	10.5721
chr18:12282405:12282938	chr18	12282405	12282938	.	534	1.16366	3.3053	6.12403e-06	0.000224569	21.6393	24.0602	28.6784	13.1432	11.3022	8.58598
chr18:13435495:13436448	chr18	13435495	13436448	.	954	0.721428	4.47987	2.08351e-05	0.00057891	27.0851	28.4317	30.5946	19.9174	16.6946	15.527
chr18:18850132:18850952	chr18	18850132	18850952	.	821	0.853202	4.00989	2.71503e-05	0.000713247	22.0896	22.3873	29.8451	10.2167	13.2731	17.6128
chr18:19013365:19013816	chr18	19013365	19013816	.	452	1.9642	2.09535	9.88057e-06	0.000323661	4.97099	15.7917	21.5245	6.81697	1.11272	2.73097
chr18:19019127:19020100	chr18	19019127	19020100	.	974	0.85797	4.17904	6.30631e-06	0.000230523	20.1027	25.6494	24.9719	11.4238	15.147	12.3114
chr18:19406110:19406508	chr18	19406110	19406508	.	399	1.19613	2.33623	0.000685458	0.00838158	15.2849	18.7839	15.3527	8.1515	8.82365	4.41962
chr18:20047713:20048364	chr18	20047713	20048364	.	652	2.41763	1.2521	8.91721e-05	0.00178293	5.16921	3.83168	6.90828	1.83784	0.514262	0.540929
chr18:20945439:20945934	chr18	20945439	20945934	.	496	2.03567	1.57995	7.25432e-05	0.001523	6.14787	10.4334	9.44429	2.41587	2.02802	1.77765
chr18:22076954:22077541	chr18	22076954	22077541	.	588	3.47428	0.576715	8.75008e-05	0.00175689	3.82123	3.64177	3.37049	0.291125	0.285118	0.299903
chr18:27224198:27224727	chr18	27224198	27224727	.	530	1.80356	2.68119	1.36017e-07	1.12477e-05	15.4436	18.8547	19.3766	6.78267	1.89792	6.65444
chr18:28765555:28766115	chr18	28765555	28766115	.	561	1.61458	2.70796	5.85161e-07	3.59312e-05	18.8814	17.1767	13.8097	5.18732	4.4826	6.60106
chr18:30491263:30492133	chr18	30491263	30492133	.	871	1.98156	1.23455	0.000709673	0.00860427	3.50097	3.89264	3.72333	0.982673	0.962396	0.80984
chr18:32675477:32676532	chr18	32675477	32676532	.	1056	0.934553	3.62402	5.51923e-05	0.00123444	15.0461	17.9123	11.7723	10.3746	7.30291	5.6777
chr18:33040580:33041155	chr18	33040580	33041155	.	576	1.78979	2.41544	7.94268e-07	4.56178e-05	13.9316	11.1529	15.3268	3.56628	4.65693	3.36766
chr18:33058116:33059396	chr18	33058116	33059396	.	1281	1.25051	5.27651	3.53462e-16	9.75094e-13	40.4675	50.8454	35.4429	17.3721	16.621	19.2724
chr18:33282537:33283962	chr18	33282537	33283962	.	1426	1.50045	2.57378	6.51782e-06	0.00023651	7.09045	5.6312	4.67477	2.04073	2.11619	1.9786
chr18:33790849:33791384	chr18	33790849	33791384	.	536	1.64393	2.56294	1.29439e-06	6.61791e-05	16.169	16.3132	14.7899	3.51305	5.94279	5.59296
chr18:37526364:37527152	chr18	37526364	37527152	.	789	1.03851	3.34939	4.48175e-05	0.00105049	15.0525	15.3794	20.0948	8.46145	10.8367	5.14054
chr18:38447545:38448757	chr18	38447545	38448757	.	1213	0.740011	4.39356	2.87742e-05	0.000747418	20.1111	20.5956	23.3194	13.2655	9.67474	15.41
chr18:41245048:41245680	chr18	41245048	41245680	.	633	1.48514	2.50697	1.12235e-05	0.000357522	11.9165	12.6858	12.8081	4.05644	4.50243	4.7359
chr18:42038551:42039237	chr18	42038551	42039237	.	687	1.02669	3.3705	3.5516e-05	0.000872247	17.9882	19.2213	21.5048	7.22601	10.7374	10.7808
chr18:42466940:42467772	chr18	42466940	42467772	.	833	0.604662	4.86797	6.03944e-05	0.00131849	43.7355	33.847	47.7997	31.0305	24.1512	27.3088
chr18:42630620:42631474	chr18	42630620	42631474	.	855	0.99392	3.6621	9.84656e-06	0.000322852	18.2078	19.8274	19.5972	10.411	10.3923	8.0437
chr18:42933481:42933788	chr18	42933481	42933788	.	308	1.26078	2.69396	6.42538e-05	0.00138574	21.8852	38.8179	23.9834	13.8946	9.79769	11.4508
chr18:43382376:43383375	chr18	43382376	43383375	.	1000	1.42244	3.58718	1.49707e-08	1.93061e-06	14.2838	20.5214	16.3953	3.93718	9.05307	5.99565
chr18:45790246:45791148	chr18	45790246	45791148	.	903	2.26111	3.05665	1.50264e-12	1.18944e-09	14.7517	13.6355	15.5627	3.22269	3.71316	2.14814
chr18:45856664:45857419	chr18	45856664	45857419	.	756	0.701948	4.0558	0.000264562	0.00408168	26.9609	25.7284	27.4065	15.3973	19.293	14.462
chr18:46149658:46150299	chr18	46149658	46150299	.	642	1.53131	1.84156	0.000543844	0.00704742	7.99959	5.00318	9.54161	3.46629	2.8725	1.37339
chr18:46574714:46575136	chr18	46574714	46575136	.	423	0.960161	3.27753	0.000137114	0.00248315	29.2148	27.4209	31.0928	16.9968	15.0607	12.9235
chr18:46621527:46622045	chr18	46621527	46622045	.	519	0.936844	3.81743	1.85881e-05	0.00052703	28.4494	37.4772	38.8802	11.8739	22.6117	20.0467
chr18:47216622:47217335	chr18	47216622	47217335	.	714	1.26664	3.55421	1.45153e-07	1.18063e-05	21.354	20.9937	25.4859	10.549	9.15732	8.39727
chr18:47217479:47217793	chr18	47217479	47217793	.	315	1.71464	2.43073	1.66242e-06	8.13392e-05	26.4939	19.2609	28.0261	8.1515	6.38664	7.83745
chr18:47626394:47626906	chr18	47626394	47626906	.	513	1.24447	4.10777	1.38908e-09	2.76938e-07	40.3576	45.5682	53.3831	18.3528	17.3205	23.0311
chr18:47652641:47653257	chr18	47652641	47653257	.	617	1.21138	3.27221	5.448e-06	0.000205383	23.4105	16.7746	23.0685	5.27139	10.0535	12.0039
chr18:47689108:47689642	chr18	47689108	47689642	.	535	1.29789	2.17163	0.000635554	0.00791601	10.7994	7.33799	15.1543	3.83959	5.64054	3.95535
chr18:48917969:48918783	chr18	48917969	48918783	.	815	2.20475	2.45837	2.04848e-08	2.51101e-06	8.07382	8.10126	15.2535	0.630116	3.49698	2.59646
chr18:52379357:52379915	chr18	52379357	52379915	.	559	2.5909	1.00441	0.000229079	0.00365571	6.02921	5.42682	3.86765	2.1436	0.299909	0
chr18:52409836:52410494	chr18	52409836	52410494	.	659	1.77384	3.70086	1.15572e-12	9.66068e-10	29.9552	25.1829	34.1745	8.83183	8.64959	8.56292
chr18:53256609:53257146	chr18	53256609	53257146	.	538	1.13728	2.43226	0.000818608	0.00955758	12.8274	12.2723	13.7303	7.31817	3.42778	6.88327
chr18:53398980:53399909	chr18	53398980	53399909	.	930	0.775448	4.38546	9.74662e-06	0.000320332	24.6778	28.2061	30.9966	16.1978	16.9452	15.7381
chr18:53900610:53901183	chr18	53900610	53901183	.	574	1.07621	2.67902	0.000459502	0.00617955	13.4209	16.1659	13.4969	7.15742	5.54937	7.68043
chr18:54184028:54184497	chr18	54184028	54184497	.	470	0.894429	3.27329	0.000366122	0.00522343	25.9519	22.7804	28.7502	12.0191	15.6948	13.8823
chr18:55455741:55456540	chr18	55455741	55456540	.	800	1.71525	2.22051	1.00053e-05	0.00032713	11.0338	7.80704	5.85546	2.7817	2.93386	1.76343
chr18:55724469:55725181	chr18	55724469	55725181	.	713	0.759512	3.9928	0.000124784	0.0023093	31.9633	24.7773	25.5217	15.1254	15.5187	18.0547
chr18:56193908:56195132	chr18	56193908	56195132	.	1225	0.861246	3.32301	0.000504044	0.00664335	8.25386	10.634	11.7661	6.2883	5.61112	4.89441
chr18:56219406:56219863	chr18	56219406	56219863	.	458	1.75178	1.74858	0.000155122	0.00271984	8.76047	11.299	10.6213	3.73759	2.56233	2.69519
chr18:56664838:56666271	chr18	56664838	56666271	.	1434	1.85659	2.15293	8.3498e-06	0.000285942	4.02908	6.47087	3.01536	0.716241	2.33821	0.614863
chr18:59509361:59509900	chr18	59509361	59509900	.	540	1.03726	3.00634	0.000156835	0.00274371	19.0213	18.5056	20.0187	9.82709	9.00339	9.1437
chr18:59619052:59620086	chr18	59619052	59620086	.	1035	0.682504	5.43502	2.11035e-07	1.60313e-05	49.0004	44.6548	59.7078	27.2898	30.6142	37.6539
chr18:60520015:60520426	chr18	60520015	60520426	.	412	1.8474	1.64564	0.000169808	0.00291616	10.1281	7.36309	14.4309	3.7394	2.4415	2.5681
chr18:63029985:63030502	chr18	63029985	63030502	.	518	1.41132	2.77741	4.52374e-06	0.000177521	19.2094	16.8801	18.782	7.60073	5.50201	7.48946
chr18:65092946:65093334	chr18	65092946	65093334	.	389	0.878661	3.44616	0.000267031	0.00411246	42.4953	27.5239	35.1999	15.842	23.2727	18.1329
chr18:65267046:65268155	chr18	65267046	65268155	.	1110	0.791566	4.86598	2.94597e-07	2.10901e-05	30.7971	28.455	39.6045	18.1977	20.6919	18.1109
chr18:66114419:66115145	chr18	66114419	66115145	.	727	0.942167	4.04397	2.29268e-06	0.000104718	30.4647	30.682	26.5172	12.9505	14.7587	17.9496
chr18:66506848:66507337	chr18	66506848	66507337	.	490	1.32333	2.78047	1.65984e-05	0.000484068	16.7042	17.4805	23.1645	5.5896	7.52711	9.71684
chr18:66658347:66658999	chr18	66658347	66658999	.	653	1.34319	2.20433	0.000326844	0.00477801	11.5515	7.65161	8.82906	3.9322	4.36453	2.7005
chr18:67800046:67800895	chr18	67800046	67800895	.	850	1.71404	3.04065	1.43093e-08	1.85566e-06	16.0492	13.6459	12.9297	3.02085	3.15575	6.84625
chr18:68001025:68001359	chr18	68001025	68001359	.	335	2.001	1.41753	0.000339916	0.00492654	10.0607	13.3169	10.2185	1.53297	1.00089	5.79036
chr18:71007651:71008239	chr18	71007651	71008239	.	589	1.43212	2.47672	4.42535e-05	0.00104078	14.1691	12.7245	11.9296	2.90631	3.13097	8.38302
chr18:72662996:72663488	chr18	72662996	72663488	.	493	1.06795	2.96167	0.000173014	0.00295667	17.5792	19.9078	24.1199	13.5417	7.14125	8.58464
chr18:73522036:73523616	chr18	73522036	73523616	.	1581	1.23531	4.0331	3.36247e-09	5.73189e-07	13.7042	12.3028	16.7519	6.60473	5.93824	5.57694
chr18:73591014:73591761	chr18	73591014	73591761	.	748	1.30546	2.92556	6.86161e-06	0.000246526	14.3756	13.8368	13.2476	5.95016	6.27564	4.47929
chr19:5605299:5605915	chr19	5605299	5605915	.	617	2.04892	2.61007	6.17913e-09	9.43894e-07	16.6474	11.2794	17.2284	3.3293	4.07575	3.42968
chr19:11847615:11847899	chr19	11847615	11847899	.	285	1.31883	3.95119	9.8204e-10	2.10941e-07	78.275	76.3877	72.6994	28.2299	27.0592	35.8873
chr19:13907427:13907970	chr19	13907427	13907970	.	544	0.605628	4.43472	0.000395171	0.0055265	51.9238	52.4843	37.0934	32.0965	29.8934	31.1193
chr19:16945448:16945775	chr19	16945448	16945775	.	328	1.9484	1.44956	0.000400375	0.00557344	8.31817	13.6011	13.183	5.21895	0.511126	3.22578
chr19:21205893:21207114	chr19	21205893	21207114	.	1222	2.10278	1.95267	2.26852e-06	0.000103888	5.25341	4.23482	4.57055	0.840499	0.823156	1.58737
chr19:21267177:21267460	chr19	21267177	21267460	.	284	2.20134	1.562	2.99717e-05	0.000773251	17.5185	14.4517	13.3223	3.61651	1.77094	4.34648
chr19:24236868:24237798	chr19	24236868	24237798	.	931	1.07596	3.82718	8.00222e-07	4.58838e-05	17.7558	21.0839	21.8679	9.74503	11.5248	7.38707
chr19:30520712:30521498	chr19	30520712	30521498	.	787	0.811372	3.6781	0.000243823	0.00382986	23.2479	15.6453	21.5194	12.8332	10.8642	10.7553
chr19:31953021:31953621	chr19	31953021	31953621	.	601	2.89171	2.25185	2.20225e-10	6.44692e-08	13.8861	12.4705	12.5908	0.569656	0.836852	3.8144
chr19:44247152:44247703	chr19	44247152	44247703	.	552	0.990478	3.75882	8.74973e-06	0.000295405	35.1803	24.2455	35.903	15.5056	12.4522	20.1261
chr19:46572935:46573740	chr19	46572935	46573740	.	806	1.76301	1.96113	3.51297e-05	0.00086644	8.56222	5.53494	6.25894	1.69907	2.28802	1.96909
chr19:46621217:46621830	chr19	46621217	46621830	.	614	1.77822	2.13849	1.36544e-05	0.000416413	7.05746	7.847	16.1388	1.95158	4.09567	2.87203
chr19:46683877:46684772	chr19	46683877	46684772	.	896	1.81851	1.89336	5.34376e-05	0.00120468	3.04505	8.36468	6.43457	0.955254	2.2453	1.7713
chr19:46724895:46725956	chr19	46724895	46725956	.	1062	0.858775	4.32325	2.23019e-06	0.000102471	23.5751	25.5404	22.5634	12.7338	11.2082	15.6085
chr19:47780729:47781454	chr19	47780729	47781454	.	726	1.01101	3.12512	0.00015987	0.00278619	15.4744	15.7308	15.1381	5.18732	8.31319	9.47296
chr19:50289498:50290181	chr19	50289498	50290181	.	684	1.91167	1.74962	8.49905e-05	0.00172215	5.63129	6.52217	8.95572	0.250265	2.45101	2.83592
chr19:50296460:50297142	chr19	50296460	50297142	.	683	0.906997	3.11255	0.000735753	0.00885763	14.0988	11.7571	21.8945	9.52401	8.34565	7.48747
chr2:5906167:5907158	chr2	5906167	5907158	.	992	1.08943	2.92784	0.000164211	0.00284238	9.70717	9.89371	10.3524	6.55736	2.70402	4.79965
chr2:9318220:9320389	chr2	9318220	9320389	.	2170	0.616424	4.91337	2.19157e-05	0.000599335	16.4929	17.3513	16.0242	10.8073	10.6616	11.0519
chr2:9450442:9451183	chr2	9450442	9451183	.	742	0.899168	3.15036	0.000551948	0.00712317	13.6267	15.3916	16.0257	7.8439	7.23016	9.03103
chr2:10058408:10058814	chr2	10058408	10058814	.	407	1.47039	2.40762	3.42221e-05	0.000851624	17.3505	20.1684	16.3789	6.7295	9.06213	3.4662
chr2:10081139:10082037	chr2	10081139	10082037	.	899	1.22177	2.35936	0.000531213	0.00691603	8.56908	4.56537	9.21883	3.23703	2.61078	3.72693
chr2:11343503:11344563	chr2	11343503	11344563	.	1061	1.54988	3.43472	2.59458e-09	4.56883e-07	17.8492	12.9504	13.2451	5.16288	5.05634	4.81992
chr2:11353224:11353862	chr2	11353224	11353862	.	639	0.868109	3.69379	0.000100161	0.00195202	24.6138	27.3674	24.5299	18.4844	13.3805	9.9348
chr2:12260003:12261255	chr2	12260003	12261255	.	1253	1.14871	3.27471	1.41215e-05	0.000426721	10.6311	8.2601	11.9345	4.09852	3.07736	6.75535
chr2:12391164:12392250	chr2	12391164	12392250	.	1087	2.13682	2.45544	3.49373e-08	3.8293e-06	10.6306	7.38739	4.97244	0.629923	2.62193	1.94675
chr2:12461191:12462189	chr2	12461191	12462189	.	999	0.714654	4.67532	1.13088e-05	0.000359417	31.8092	28.4014	33.9055	14.7364	23.83	18.711
chr2:12552959:12553438	chr2	12552959	12553438	.	480	1.47992	1.85408	0.000638905	0.00794253	10.3651	7.43527	12.3865	3.56628	3.14343	4.04119
chr2:12624622:12625053	chr2	12624622	12625053	.	432	1.59366	2.05528	7.53565e-05	0.00156863	14.4888	14.0444	11.2605	4.75504	4.65693	3.67381
chr2:12633234:12633577	chr2	12633234	12633577	.	344	1.74659	1.84651	9.44097e-05	0.00186295	9.79747	16.5997	17.8073	3.98097	3.89882	5.12624
chr2:12674747:12675307	chr2	12674747	12675307	.	561	1.46436	2.76492	3.98696e-06	0.00016101	11.4433	20.6756	18.9481	3.96677	7.47101	6.9154
chr2:17796921:17797588	chr2	17796921	17797588	.	668	1.31102	2.57024	5.57151e-05	0.00124373	12.2531	12.5554	11.0582	4.61268	4.26653	5.54371
chr2:17929072:17929674	chr2	17929072	17929674	.	603	1.10753	2.52917	0.000654663	0.00808914	11.4447	14.2047	11.3539	6.24543	4.44841	6.43373
chr2:18158116:18158993	chr2	18158116	18158993	.	878	0.984638	3.24009	0.000171124	0.00293223	9.32242	13.414	18.8786	6.82387	8.01967	6.02538
chr2:18414347:18414819	chr2	18414347	18414819	.	473	0.820686	3.33374	0.000809907	0.00948377	29.8589	22.6359	26.2824	17.0096	14.1775	13.4214
chr2:18527198:18527382	chr2	18527198	18527382	.	185	2.23251	1.00673	0.000658578	0.00812883	13.0128	19.2915	12.6605	3.70122	2.71864	2.85961
chr2:19298443:19298884	chr2	19298443	19298884	.	442	1.05412	3.26616	5.39488e-05	0.00121328	34.8579	24.2235	25.6801	15.1043	8.72384	17.1555
chr2:19738008:19738870	chr2	19738008	19738870	.	863	1.13319	3.22942	1.76359e-05	0.000505194	11.3441	13.2336	18.7892	6.74412	7.38201	5.5171
chr2:20621697:20622196	chr2	20621697	20622196	.	500	1.2923	2.62416	5.80392e-05	0.00127981	16.6911	16.0602	16.9358	7.87435	8.04717	4.23223
chr2:20691750:20692258	chr2	20691750	20692258	.	509	0.783191	4.09253	4.95448e-05	0.00113484	42.5666	36.11	46.0154	22.8691	28.3258	21.1334
chr2:27123575:27123887	chr2	27123575	27123887	.	313	1.18222	2.68652	0.000179025	0.00303983	23.5867	34.207	23.6003	7.10978	12.3193	16.3385
chr2:27928785:27929765	chr2	27928785	27929765	.	981	1.01141	4.19284	1.37009e-07	1.12894e-05	23.8856	22.1921	27.365	11.1678	13.159	12.0438
chr2:28325293:28325685	chr2	28325293	28325685	.	393	2.89745	0.898451	9.9262e-05	0.00193885	7.35077	8.17313	5.04287	0	1.27977	1.34613
chr2:28471465:28471756	chr2	28471465	28471756	.	292	1.99744	1.56347	0.000134216	0.00244351	14.84	17.7224	10.4892	2.34495	1.72243	6.64305
chr2:28872184:28873244	chr2	28872184	28873244	.	1061	1.4166	2.18778	0.000176427	0.00300455	6.50438	4.70924	6.11315	2.25876	2.52817	1.66204
chr2:29219903:29220625	chr2	29219903	29220625	.	723	0.822889	3.52465	0.000430523	0.00588913	15.5386	21.4728	22.4275	13.7324	10.2027	9.51226
chr2:29335916:29337623	chr2	29335916	29337623	.	1708	1.28034	4.41626	9.4984e-12	5.5686e-09	17.7593	17.0297	17.5105	7.81743	6.47825	7.22716
chr2:29740714:29741380	chr2	29740714	29741380	.	667	1.27244	3.26509	2.28506e-06	0.000104439	22.618	17.3898	18.9082	9.75247	10.3053	4.23011
chr2:29989077:29989619	chr2	29989077	29989619	.	543	1.19199	2.95994	3.54623e-05	0.000871546	18.9162	13.1452	25.2169	8.51179	7.40992	9.09318
chr2:30067615:30068139	chr2	30067615	30068139	.	525	1.75848	2.05342	2.64488e-05	0.000699322	14.9792	7.47776	10.9817	2.93454	1.91599	5.03836
chr2:30259951:30260341	chr2	30259951	30260341	.	391	1.30708	2.65948	3.45072e-05	0.000855957	20.1128	23.732	21.657	10.0695	7.71787	8.56908
chr2:30263035:30263496	chr2	30263035	30263496	.	462	0.898754	3.50487	0.000139704	0.00251889	29.1803	33.2173	30.8079	16.303	12.7007	20.9932
chr2:30497420:30498080	chr2	30497420	30498080	.	661	2.42307	1.25168	0.000124887	0.00230996	4.85603	6.20919	4.63367	0	2.28267	0.533563
chr2:30644609:30645821	chr2	30644609	30645821	.	1213	1.10162	3.8046	7.05837e-07	4.17129e-05	14.2895	17.3592	14.4075	6.35051	5.52842	9.59491
chr2:30647997:30648536	chr2	30647997	30648536	.	540	1.64647	1.78358	0.0004682	0.00627462	9.51063	2.97411	13.6794	3.48703	1.55231	3.26561
chr2:30878123:30879268	chr2	30878123	30879268	.	1146	0.940172	3.51811	7.93201e-05	0.00163689	10.0833	13.547	14.7782	8.51427	5.12018	6.30895
chr2:30889334:30889916	chr2	30889334	30889916	.	583	1.02493	2.93958	0.000348682	0.00502108	21.4723	14.9981	13.9066	7.34055	6.03883	11.494
chr2:33435609:33436249	chr2	33435609	33436249	.	641	0.896996	3.10757	0.000678342	0.00832503	19.279	16.7033	14.3347	9.34689	9.41557	8.25317
chr2:33448944:33449369	chr2	33448944	33449369	.	426	1.92793	1.44276	0.000364019	0.0051977	12.4325	6.28333	7.61273	2.81284	2.36126	1.6558
chr2:33650843:33651139	chr2	33650843	33651139	.	297	1.45127	2.17708	0.000183467	0.00309615	25.3977	12.6174	23.6584	8.06917	10.1606	4.15623
chr2:36677826:36678769	chr2	36677826	36678769	.	944	0.747912	3.72379	0.000520846	0.00680661	15.3011	19.6594	16.4136	9.24816	11.7212	9.52699
chr2:37116781:37117574	chr2	37116781	37117574	.	794	0.88226	4.21376	2.30533e-06	0.000105226	30.5217	27.6435	31.0869	15.3072	17.7362	15.3245
chr2:37510371:37510701	chr2	37510371	37510701	.	331	2.03733	1.2695	0.000508695	0.00668686	8.72765	13.4778	8.16471	2.58582	3.54546	1.06552
chr2:37812765:37814202	chr2	37812765	37814202	.	1438	0.71809	3.76603	0.000748003	0.00896466	13.3929	9.55521	11.4015	7.49961	5.82925	7.60309
chr2:38373496:38374720	chr2	38373496	38374720	.	1225	0.800767	3.45245	0.000674623	0.00829	10.2191	10.7796	12.0602	6.2883	5.61112	7.05371
chr2:38819843:38820783	chr2	38819843	38820783	.	941	2.40184	2.11993	6.89863e-08	6.61087e-06	9.55105	4.36161	7.46711	0.545744	2.31609	1.1244
chr2:38917664:38918513	chr2	38917664	38918513	.	850	0.866886	4.08774	1.11302e-05	0.000355023	21.9024	25.4024	28.8269	10.4723	14.5954	16.597
chr2:39276901:39277806	chr2	39276901	39277806	.	906	1.16942	2.43077	0.000620133	0.00777283	8.68002	6.89363	7.55671	2.83413	2.40556	5.06061
chr2:39858543:39859298	chr2	39858543	39859298	.	756	1.34502	3.28721	3.79885e-07	2.56121e-05	13.3743	19.5914	20.9719	7.01935	7.31803	6.76447
chr2:40328254:40328676	chr2	40328254	40328676	.	423	1.21678	2.99472	1.68089e-05	0.000488564	27.6972	20.2493	27.6854	11.7359	9.11569	11.6728
chr2:43196693:43197556	chr2	43196693	43197556	.	864	0.64063	4.27987	0.000505257	0.00665427	21.176	27.0561	32.7389	14.2651	15.3291	22.2469
chr2:43694793:43695612	chr2	43694793	43695612	.	820	1.4885	2.20661	0.000110901	0.00210631	8.80748	4.35236	9.88727	1.87882	2.65786	3.65589
chr2:45186030:45186522	chr2	45186030	45186522	.	493	2.00467	1.75919	2.24982e-05	0.000612848	10.0918	10.1349	9.50176	3.12502	2.04036	2.14616
chr2:45966979:45968050	chr2	45966979	45968050	.	1072	1.26109	3.28697	1.86882e-06	8.9358e-05	14.073	10.82	12.2689	4.15179	7.3503	3.94797
chr2:47211898:47212976	chr2	47211898	47212976	.	1079	0.769229	4.27163	3.14046e-05	0.000801637	20.675	18.3573	27.5512	10.9467	13.3622	14.7088
chr2:48475490:48476120	chr2	48475490	48476120	.	631	1.10261	3.15509	3.4896e-05	0.000861903	20.8563	20.0788	14.5619	9.22373	8.50203	8.1045
chr2:48625102:48625875	chr2	48625102	48625875	.	774	0.665096	4.51664	6.94915e-05	0.00147351	32.9692	37.1187	37.244	26.3186	22.3099	18.9101
chr2:53280954:53281481	chr2	53280954	53281481	.	528	1.68764	2.64765	4.9316e-07	3.15052e-05	13.9822	21.9679	15.6965	7.13257	5.08028	3.67381
chr2:53285576:53285984	chr2	53285576	53285984	.	409	1.09381	2.92774	0.000113853	0.00215235	22.3668	25.7417	24.6685	12.9746	11.0673	9.91658
chr2:54349776:54350549	chr2	54349776	54350549	.	774	1.64924	1.72585	0.000417011	0.00574622	3.73237	6.22488	7.68158	1.32699	2.38261	1.82266
chr2:54466575:54466888	chr2	54466575	54466888	.	314	0.93016	3.21917	0.00035431	0.00508418	39.8674	35.2347	37.2959	26.713	19.7549	12.3552
chr2:54747819:54748225	chr2	54747819	54748225	.	407	0.932563	3.97811	7.39141e-06	0.000260577	62.3039	35.5139	50.9074	29.4415	21.0077	27.7296
chr2:54837892:54838220	chr2	54837892	54838220	.	329	1.62262	2.03146	8.3591e-05	0.00170278	10.732	21.6956	19.7144	5.20309	4.58615	6.96795
chr2:54861734:54862408	chr2	54861734	54862408	.	675	0.629984	4.34368	0.000340754	0.00493559	30.1962	36.218	41.6388	24.853	24.0918	20.6386
chr2:55082464:55083162	chr2	55082464	55083162	.	699	0.820665	4.95419	3.95122e-08	4.25677e-06	50.742	60.2481	57.2207	29.8772	30.6997	34.5622
chr2:55585014:55585856	chr2	55585014	55585856	.	843	0.713774	4.61942	1.11952e-05	0.000356787	41.5032	33.2338	32.2721	22.3369	21.6771	21.3368
chr2:61482730:61483275	chr2	61482730	61483275	.	546	1.68369	2.55988	8.46056e-07	4.77819e-05	12.3455	15.034	19.4687	4.70279	4.9128	4.84458
chr2:62376709:62377295	chr2	62376709	62377295	.	587	0.846545	4.08485	1.42389e-05	0.000428959	33.356	38.3037	37.7524	19.8302	24.2763	16.5227
chr2:63166862:63167325	chr2	63166862	63167325	.	464	1.66317	1.88809	0.000127777	0.00234758	11.0684	9.23	12.8137	4.42711	2.89051	3.04039
chr2:63925730:63926994	chr2	63925730	63926994	.	1265	1.03537	2.72594	0.000745123	0.00893941	4.69423	9.31026	6.12429	3.65368	3.57829	2.50922
chr2:64439547:64440476	chr2	64439547	64440476	.	930	0.868705	5.2646	6.4703e-10	1.51659e-07	54.5327	48.3533	55.9877	32.0275	31.5469	23.3227
chr2:64441277:64442086	chr2	64441277	64442086	.	810	1.59028	2.92691	1.39965e-07	1.14514e-05	14.0678	12.5574	13.7906	4.22671	3.31159	5.87809
chr2:64500467:64501424	chr2	64500467	64501424	.	958	0.955312	3.68777	2.64725e-05	0.000699682	19.9358	16.7643	15.0453	5.71797	10.15	10.8604
chr2:64518033:64519035	chr2	64518033	64519035	.	1003	0.843236	3.89631	4.34834e-05	0.0010258	18.7214	17.7913	19.3999	8.19214	12.0347	10.9005
chr2:64575679:64576231	chr2	64575679	64576231	.	553	2.37754	1.83498	8.30319e-07	4.71806e-05	6.96529	10.326	12.3804	1.54775	1.51582	2.55107
chr2:64586986:64587678	chr2	64586986	64587678	.	693	0.807474	4.36304	7.07765e-06	0.000251944	37.9807	29.8698	43.6771	18.5261	21.5307	23.665
chr2:64690720:64691645	chr2	64690720	64691645	.	926	0.608816	4.62584	0.000145193	0.00259026	35.7034	26.5936	32.8816	21.4439	19.9152	21.1383
chr2:64821503:64822115	chr2	64821503	64822115	.	613	1.45238	2.80449	2.58218e-06	0.000114767	18.5888	14.2641	14.6956	4.18878	7.38423	5.75343
chr2:65006288:65006959	chr2	65006288	65006959	.	672	0.89621	3.32439	0.000311244	0.00461117	22.6886	16.9949	16.3545	8.40624	10.4781	11.2838
chr2:65031790:65032339	chr2	65031790	65032339	.	550	1.19449	3.82893	6.99302e-08	6.67367e-06	35.8918	36.6627	32.7578	14.6282	11.8879	19.558
chr2:65682913:65683804	chr2	65682913	65683804	.	892	0.944602	4.89442	1.52217e-09	2.97839e-07	38.6836	50.4132	41.2043	22.4532	21.0501	24.1186
chr2:65686015:65686539	chr2	65686015	65686539	.	525	1.88271	2.37621	4.23597e-07	2.80431e-05	14.6735	16.655	12.3544	2.93454	5.10931	3.6948
chr2:65722365:65722925	chr2	65722365	65722925	.	561	1.20371	2.6531	0.00013618	0.00247124	12.5876	15.9043	16.0578	6.10273	8.36753	4.71505
chr2:67741578:67742303	chr2	67741578	67742303	.	726	0.752499	3.75457	0.000438713	0.0059729	22.3274	21.8757	24.072	10.8462	13.1626	16.517
chr2:69519494:69519852	chr2	69519494	69519852	.	359	1.50226	2.1108	0.000144773	0.00258675	21.9056	15.9061	11.0409	7.15243	5.13689	4.91205
chr2:69525442:69525905	chr2	69525442	69525905	.	464	1.02033	3.1297	0.000138701	0.002506	23.8662	25.7671	23.2976	16.2327	9.75546	9.88127
chr2:70161079:70161891	chr2	70161079	70161891	.	813	1.55798	2.41595	1.09288e-05	0.000350227	9.67294	8.34068	9.52918	3.36889	2.06211	3.90427
chr2:72463495:72464064	chr2	72463495	72464064	.	570	0.657193	3.98559	0.000814391	0.00952717	29.8458	31.9325	38.2462	22.5239	18.5297	22.2749
chr2:72993135:72993695	chr2	72993135	72993695	.	561	2.38715	1.52244	1.69316e-05	0.000490485	6.2938	6.36173	10.277	2.74623	0.896521	0.628673
chr2:73005568:73006337	chr2	73005568	73006337	.	770	1.14737	3.09139	2.75752e-05	0.000722363	13.9649	14.3684	15.677	8.00329	7.18497	4.58033
chr2:73030276:73030676	chr2	73030276	73030676	.	401	1.14913	3.13879	2.06544e-05	0.000575387	28.4163	29.3703	29.6536	16.2217	13.7966	9.23491
chr2:73207489:73208224	chr2	73207489	73208224	.	736	0.733611	3.74872	0.000557805	0.00718272	23.5504	22.0634	21.0522	15.1179	13.2115	11.7402
chr2:73255980:73256530	chr2	73255980	73256530	.	551	2.56264	1.46389	7.54202e-06	0.000265347	6.11675	6.47719	10.1365	1.55337	0.912792	1.28017
chr2:74058162:74058516	chr2	74058162	74058516	.	355	0.68525	5.28303	2.86749e-07	2.0702e-05	120.708	131.699	150.225	86.7963	80.2828	82.9556
chr2:74096986:74097582	chr2	74096986	74097582	.	597	1.41766	2.00766	0.000546359	0.00706945	7.52725	6.57592	12.9769	2.58063	4.77394	2.65843
chr2:74885560:74886102	chr2	74885560	74886102	.	543	1.59669	2.14089	5.43368e-05	0.00121963	14.1871	10.1876	9.29043	2.52201	3.08747	5.52086
chr2:75327240:75327775	chr2	75327240	75327775	.	536	1.33233	2.67543	2.66397e-05	0.000703028	17.9655	14.3157	16.1344	7.66485	7.19391	4.27697
chr2:75504324:75504828	chr2	75504324	75504828	.	505	1.13134	2.524	0.000586256	0.00745772	19.0683	10.9541	13.914	8.13536	5.31166	6.63468
chr2:75703551:75704359	chr2	75703551	75704359	.	809	0.878164	3.8537	3.43411e-05	0.000853973	22.0205	27.7927	18.0391	12.9074	13.6772	10.2449
chr2:75822717:75823447	chr2	75822717	75823447	.	731	1.47939	3.67771	1.34276e-09	2.6925e-07	21.0769	30.7582	23.6609	6.79106	11.9258	8.20199
chr2:76080586:76080994	chr2	76080586	76080994	.	409	1.40659	3.10264	6.08195e-07	3.69821e-05	25.506	34.904	27.752	12.9746	12.297	7.76081
chr2:83799305:83800125	chr2	83799305	83800125	.	821	0.683466	4.30125	0.000122288	0.00227279	30.8864	29.56	26.7728	20.4334	17.9697	15.8945
chr2:85128260:85129369	chr2	85128260	85129369	.	1110	1.02569	4.52002	5.86769e-09	9.06682e-07	22.9894	29.7411	29.3787	14.4965	12.2339	13.5037
chr2:85389821:85390494	chr2	85389821	85390494	.	674	2.05621	1.38052	0.000271724	0.00415981	7.85791	4.50088	3.74236	2.03183	0.746214	1.04654
chr2:85660873:85661177	chr2	85660873	85661177	.	305	1.62033	1.71137	0.000499324	0.00659743	12.1027	18.7223	12.9957	5.05126	3.84769	5.20356
chr2:85895762:85896328	chr2	85895762	85896328	.	567	2.0813	1.61807	4.19863e-05	0.000996889	7.92552	7.55329	7.94391	0.905723	2.36542	2.17707
chr2:86148164:86148629	chr2	86148164	86148629	.	466	0.824354	3.61738	0.000304704	0.00454241	36.8511	31.0175	30.1569	16.1631	14.0307	25.354
chr2:87551716:87552842	chr2	87551716	87552842	.	1127	0.671669	4.09226	0.000435795	0.00594133	20.0793	16.6255	17.9049	12.9108	9.07419	12.3612
chr2:87745147:87745657	chr2	87745147	87745657	.	511	2.19154	3.42525	4.61262e-14	6.1543e-11	32.9778	33.8734	33.495	4.68991	6.8897	10.3528
chr2:87905227:87905896	chr2	87905227	87905896	.	670	0.966565	3.19275	0.000204066	0.00335579	18.6841	20.2417	13.1765	9.19782	8.50758	8.94874
chr2:88337718:88338395	chr2	88337718	88338395	.	678	0.627199	5.19482	3.79112e-06	0.000155638	65.0962	60.2718	69.6224	39.6394	47.9705	38.4937
chr2:96108066:96108969	chr2	96108066	96108969	.	904	0.996843	4.58734	7.97118e-09	1.14739e-06	36.3947	36.7158	31.6888	17.4211	20.9562	14.045
chr2:96298977:96300425	chr2	96298977	96300425	.	1449	0.731196	4.54608	1.42339e-05	0.000428959	18.8293	18.2264	22.5055	11.6956	14.3468	9.73597
chr2:98870096:98870479	chr2	98870096	98870479	.	384	0.912793	3.06228	0.000729089	0.00879267	27.1666	21.8411	32.8431	17.3856	11.7878	14.236
chr2:100297274:100298006	chr2	100297274	100298006	.	733	0.856234	4.8411	3.14969e-08	3.53508e-06	51.2348	49.4197	48.6675	24.9883	27.2173	30.3127
chr2:100496374:100497685	chr2	100496374	100497685	.	1312	0.811319	4.77316	3.28031e-07	2.27133e-05	25.5661	27.6103	25.5421	17.7444	15.206	11.8279
chr2:101358571:101359759	chr2	101358571	101359759	.	1189	0.799438	4.2041	2.28744e-05	0.000620901	23.6216	18.7602	15.456	11.5177	12.267	9.49196
chr2:101679932:101680688	chr2	101679932	101680688	.	757	1.49406	2.2709	5.0251e-05	0.00114722	7.42036	9.42915	9.5201	2.71358	3.76491	2.79539
chr2:101945001:101945663	chr2	101945001	101945663	.	663	2.0585	1.9649	4.23653e-06	0.000168345	7.74621	8.88196	9.51113	2.58192	3.03438	0.531954
chr2:102048925:102049513	chr2	102048925	102049513	.	589	0.786819	3.90972	0.000144315	0.00258229	25.6133	38.1736	31.2006	19.4723	14.2317	21.2569
chr2:105018253:105018855	chr2	105018253	105018855	.	603	1.19658	2.28533	0.000859385	0.00992743	10.9124	11.5413	8.96358	2.83883	5.83854	4.97152
chr2:106026025:106026490	chr2	106026025	106026490	.	466	1.25296	2.57873	0.000143856	0.00257501	15.4981	24.1248	11.5988	5.87748	6.47573	9.08203
chr2:106351461:106351880	chr2	106351461	106351880	.	420	1.33751	2.29477	0.000225835	0.0036144	16.4313	11.4716	18.8747	5.70605	4.78998	7.97741
chr2:106364008:106364899	chr2	106364008	106364899	.	892	1.2676	2.30219	0.000421656	0.00579503	7.37687	8.60225	5.85748	2.11098	4.13485	2.76771
chr2:109131088:109131453	chr2	109131088	109131453	.	366	2.21099	1.63462	1.90176e-05	0.000536795	8.77004	15.6019	13.2911	4.67709	1.83223	1.44543
chr2:112078164:112079128	chr2	112078164	112079128	.	965	0.655923	5.05607	4.6853e-06	0.000182258	34.2604	44.3805	46.8623	25.3668	29.3604	24.6697
chr2:112261799:112262442	chr2	112261799	112262442	.	644	2.01728	3.41058	6.232e-13	5.68916e-10	28.1608	25.4924	23.2204	5.58201	5.98748	7.39325
chr2:112290310:112291736	chr2	112290310	112291736	.	1427	0.742592	4.33381	3.43787e-05	0.000854295	19.5694	17.507	15.0245	12.1159	8.57632	10.5039
chr2:112452248:112452773	chr2	112452248	112452773	.	526	1.46123	3.04987	4.99033e-07	3.17933e-05	18.3071	18.6589	29.7996	8.78689	9.56175	5.69929
chr2:113638822:113639306	chr2	113638822	113639306	.	485	0.98676	3.29237	0.000125039	0.00231154	27.1347	30.5383	20.0599	14.824	15.9008	8.36265
chr2:114779643:114780472	chr2	114779643	114780472	.	830	1.414	2.53668	2.35448e-05	0.000637106	8.31464	12.2548	8.24865	3.50613	3.83776	3.39938
chr2:121044667:121045353	chr2	121044667	121045353	.	687	1.03435	3.87926	1.27002e-06	6.51728e-05	24.2957	31.1697	29.1101	15.6979	14.8859	10.5241
chr2:133555039:133555699	chr2	133555039	133555699	.	661	0.904886	3.61517	0.000116776	0.00219385	19.4241	21.0572	30.2551	18.1282	10.1452	9.33736
chr2:133561188:133562582	chr2	133561188	133562582	.	1395	0.613565	4.21022	0.000737392	0.00886967	17.2572	13.6873	16.2732	11.4121	9.73448	9.73361
chr2:133958462:133959216	chr2	133958462	133959216	.	755	0.78203	3.62281	0.00073393	0.00884029	15.7303	15.5993	29.1132	14.284	10.8806	9.80979
chr2:134104274:134104583	chr2	134104274	134104583	.	310	2.24629	1.41921	8.13889e-05	0.00167163	8.80116	9.21015	19.7604	3.86539	1.08161	2.84424
chr2:135009594:135010270	chr2	135009594	135010270	.	677	2.62331	2.29039	4.88902e-10	1.21116e-07	8.77134	13.97	12.2418	2.02283	1.48581	2.08381
chr2:135129854:135130903	chr2	135129854	135130903	.	1050	1.00329	4.26249	1.1626e-07	9.94592e-06	27.0543	24.4727	20.2474	10.923	11.017	13.9395
chr2:135163248:135163770	chr2	135163248	135163770	.	523	1.53289	1.89673	0.000436059	0.00594143	12.2747	10.2359	6.20081	3.27307	1.60277	5.05763
chr2:135166049:135166797	chr2	135166049	135166797	.	749	1.83919	1.75817	8.79649e-05	0.00176235	7.07107	5.24142	6.73525	2.74256	1.34299	1.17719
chr2:136405406:136406051	chr2	136405406	136406051	.	646	1.9901	1.92137	6.74787e-06	0.000243457	8.44694	9.66816	7.53024	1.85491	2.07615	2.45679
chr2:136700377:136701403	chr2	136700377	136701403	.	1027	1.30845	3.01957	3.67065e-06	0.00015105	11.7204	11.1203	9.47329	4.83375	4.57077	3.60584
chr2:136882918:136883397	chr2	136882918	136883397	.	480	2.81781	1.16499	3.36461e-05	0.000843274	5.01537	5.20469	10.8851	0	1.04781	1.8369
chr2:137966110:137966732	chr2	137966110	137966732	.	623	1.29919	2.32173	0.000275531	0.00419955	9.01639	8.87936	14.1705	3.84678	5.1129	3.96276
chr2:139190468:139190868	chr2	139190468	139190868	.	401	2.61367	1.38825	1.55025e-05	0.000458859	6.00343	8.01007	15.7254	0.426887	2.92655	1.31927
chr2:139755302:139756053	chr2	139755302	139756053	.	752	1.59063	2.85506	3.14483e-07	2.20011e-05	13.0186	12.1021	16.2918	2.95926	6.24226	4.45547
chr2:139837680:139838165	chr2	139837680	139838165	.	486	3.09353	1.04491	1.4965e-05	0.000446377	7.59529	6.60913	4.81931	1.05668	0.689915	0.362845
chr2:139972327:139972840	chr2	139972327	139972840	.	514	1.30019	2.60557	6.57796e-05	0.00140971	14.0508	20.4832	13.3198	5.32861	8.80648	5.14619
chr2:140141659:140142061	chr2	140141659	140142061	.	403	1.36152	2.33927	0.000232416	0.00369162	13.9385	21.697	15.2003	2.12384	6.65605	10.9394
chr2:142088557:142089106	chr2	142088557	142089106	.	550	1.07845	3.85717	4.62035e-07	2.99219e-05	34.141	37.3116	33.413	15.2507	18.8987	15.3899
chr2:142715363:142716153	chr2	142715363	142716153	.	791	1.09732	3.59981	3.25236e-06	0.000137394	19.2752	18.2733	23.4606	12.3355	6.99422	9.14039
chr2:144658668:144659380	chr2	144658668	144659380	.	713	0.824421	3.56381	0.000327373	0.00478473	22.7345	21.2734	17.6883	10.5638	14.3431	9.893
chr2:145116499:145117268	chr2	145116499	145117268	.	770	0.901727	3.9463	1.17577e-05	0.000370122	26.6792	24.1019	25.7383	15.1173	15.894	9.84771
chr2:145702121:145702665	chr2	145702121	145702665	.	545	1.93401	1.98398	7.59283e-06	0.000266282	11.4847	9.82275	10.2481	4.08323	2.46091	1.61782
chr2:145764736:145765674	chr2	145764736	145765674	.	939	1.03922	4.06868	5.36256e-07	3.36701e-05	17.0918	24.7051	29.1646	8.20359	13.3905	12.7703
chr2:145848791:145849282	chr2	145848791	145849282	.	492	1.4051	2.30975	9.66804e-05	0.00189912	15.6577	10.8809	14.2816	5.56688	4.42976	5.3763
chr2:145853348:145853905	chr2	145853348	145853905	.	558	1.53144	2.22927	5.44773e-05	0.0012216	8.34097	12.4721	14.2068	5.52199	3.30492	3.16026
chr2:146573313:146574259	chr2	146573313	146574259	.	947	1.67181	1.98838	0.000131263	0.00239835	8.98212	5.46457	2.85377	2.89219	1.94735	0.558636
chr2:147784191:147784903	chr2	147784191	147784903	.	713	1.13708	3.77492	5.96285e-07	3.65461e-05	18.2326	25.7784	33.6078	11.5241	13.8728	9.64568
chr2:148550382:148551531	chr2	148550382	148551531	.	1150	1.42204	4.25314	3.0595e-12	2.18833e-09	28.3303	21.5688	21.1502	9.52663	9.62162	7.36039
chr2:150278656:150279664	chr2	150278656	150279664	.	1009	1.15771	2.39284	0.000762522	0.00909156	6.52147	7.0742	6.60675	1.8662	3.65539	3.4954
chr2:150734437:150734876	chr2	150734437	150734876	.	440	2.58458	1.47978	5.89419e-06	0.000218918	6.93033	9.73345	12.2842	1.5562	1.14306	2.00389
chr2:151153251:151153852	chr2	151153251	151153852	.	602	1.01066	3.32139	6.16795e-05	0.0013398	23.194	23.7138	17.3584	11.0898	12.5319	8.20199
chr2:151352376:151353170	chr2	151352376	151353170	.	795	1.92705	3.27503	6.42096e-11	2.44773e-08	20.1876	17.059	18.5834	3.87581	8.01343	2.66178
chr2:151427123:151427865	chr2	151427123	151427865	.	743	1.32026	2.71288	2.27313e-05	0.000617502	9.93624	12.0085	14.0643	4.37746	4.51277	5.45879
chr2:152911026:152911489	chr2	152911026	152911489	.	464	1.50529	2.24657	6.10829e-05	0.00132934	10.3766	19.2292	12.8137	4.05818	5.05839	5.70074
chr2:153405475:153406301	chr2	153405475	153406301	.	827	1.07648	3.58512	4.32853e-06	0.000171608	18.2421	22.6565	16.5572	7.45168	9.93328	9.80866
chr2:153416791:153417067	chr2	153416791	153417067	.	277	1.87769	2.40749	4.52794e-07	2.95809e-05	28.9696	22.5474	33.1717	9.88774	9.07849	3.8197
chr2:153703524:153703854	chr2	153703524	153703854	.	331	1.41454	2.04646	0.000377179	0.00533837	16.4856	18.869	14.6965	7.75747	6.07792	4.79482
chr2:158649137:158649925	chr2	158649137	158649925	.	789	1.18661	2.92364	4.33251e-05	0.00102276	15.4593	12.6654	10.0474	6.50881	4.03718	6.25804
chr2:158711989:158712907	chr2	158711989	158712907	.	919	1.23267	3.12144	6.41575e-06	0.000233661	12.2246	14.5631	11.5668	5.40181	4.37822	6.52411
chr2:158747684:158748422	chr2	158747684	158748422	.	739	0.961305	3.33848	0.000144756	0.00258675	22.1518	14.0053	16.0908	7.6441	12.0236	7.1587
chr2:159500625:159501296	chr2	159500625	159501296	.	672	1.789	2.98336	7.90086e-09	1.142e-06	20.5391	12.7462	19.0356	5.60416	2.99374	6.56037
chr2:159698420:159698712	chr2	159698420	159698712	.	293	1.52432	1.92966	0.000341011	0.00493829	21.9101	11.5716	19.0621	8.17932	4.00528	6.01852
chr2:159947463:159947622	chr2	159947463	159947622	.	160	1.61601	1.66472	0.00080676	0.00945667	43.1322	17.8447	18.0168	8.55908	10.4781	6.61285
chr2:161065780:161066392	chr2	161065780	161066392	.	613	0.608735	4.9138	5.85884e-05	0.00128798	66.7625	45.9944	63.1911	43.5633	29.8104	42.2877
chr2:161274123:161274979	chr2	161274123	161274979	.	857	1.63165	2.03864	0.000105677	0.00203099	5.61815	6.66312	7.77855	4.19465	0.978118	1.2346
chr2:161604273:161604597	chr2	161604273	161604597	.	325	2.03754	1.35521	0.000361502	0.00516602	7.40731	17.0211	8.86981	1.05343	3.09507	3.79815
chr2:162915616:162916208	chr2	162915616	162916208	.	593	1.8737	2.08561	5.11203e-06	0.000195843	11.0964	9.93042	10.0262	2.02069	2.82714	3.56849
chr2:162929961:162931473	chr2	162929961	162931473	.	1513	1.1215	3.796	3.35396e-07	2.3108e-05	12.1987	13.7992	10.8363	4.97818	5.87271	6.06069
chr2:165562507:165563525	chr2	165562507	165563525	.	1019	0.856248	5.66137	1.04093e-11	6.0183e-09	60.1647	58.665	71.9611	35.9498	34.2209	35.1301
chr2:167990647:167991843	chr2	167990647	167991843	.	1197	1.09346	3.91037	2.29227e-07	1.71932e-05	18.3687	15.8023	15.9547	7.72248	8.96371	6.77675
chr2:168438483:168439066	chr2	168438483	168439066	.	584	0.844047	3.65469	0.000161746	0.00281252	28.3059	22.9169	29.6167	17.8803	11.7699	15.3998
chr2:168894412:168894672	chr2	168894412	168894672	.	261	1.77215	1.64626	0.000322485	0.00473323	13.528	13.6741	22.7799	3.27934	8.35035	2.70257
chr2:169025623:169026244	chr2	169025623	169026244	.	622	1.0798	2.82894	0.000319725	0.00470326	15.4815	16.0659	12.745	9.35719	8.08598	3.40211
chr2:169440019:169440998	chr2	169440019	169440998	.	980	1.74231	2.57337	3.59505e-07	2.45255e-05	7.36952	8.55815	10.663	2.27078	2.73713	2.87907
chr2:171018616:171019172	chr2	171018616	171019172	.	557	1.18717	3.19899	8.65315e-06	0.000292714	22.7628	24.6686	18.7608	8.29785	8.12663	12.6638
chr2:171034571:171035464	chr2	171034571	171035464	.	894	1.44264	3.60732	5.18453e-09	8.19369e-07	18.4907	18.9624	20.7576	5.16991	6.1884	10.0598
chr2:172042307:172043119	chr2	172042307	172043119	.	813	2.17547	1.76689	1.06049e-05	0.000342872	9.08072	4.38983	4.87539	1.68444	0.412422	1.95213
chr2:172508822:172509343	chr2	172508822	172509343	.	522	2.25795	2.46197	2.20951e-09	4.04475e-07	16.6026	15.7252	16.9123	3.27934	3.21167	3.71603
chr2:173832856:173833252	chr2	173832856	173833252	.	397	0.878894	3.39421	0.000324923	0.0047611	38.0006	32.3631	29.0447	12.9356	19.0031	22.2094
chr2:174508605:174509321	chr2	174508605	174509321	.	717	1.74028	2.19685	8.03658e-06	0.000278285	10.0727	9.20854	8.04097	2.14872	3.74113	2.21351
chr2:174843153:174843444	chr2	174843153	174843444	.	292	1.43987	2.44363	3.63667e-05	0.000888913	17.0385	31.167	28.9996	10.5523	9.76041	7.85088
chr2:174923879:174925045	chr2	174923879	174925045	.	1167	1.09665	2.86005	0.000170324	0.00292321	7.83893	8.25717	8.18244	2.64033	4.74073	3.9288
chr2:174982911:174983593	chr2	174982911	174983593	.	683	1.5087	3.15727	8.10584e-08	7.48846e-06	18.5635	16.4599	20.8393	5.5139	8.83657	5.16377
chr2:175480505:175481271	chr2	175480505	175481271	.	767	0.679597	4.16606	0.00032164	0.00472402	27.6205	30.7105	26.5437	21.4256	19.0163	12.4153
chr2:175700506:175701213	chr2	175700506	175701213	.	708	1.04678	3.43397	2.06585e-05	0.000575387	18.3614	23.188	18.3222	9.91306	7.10379	11.9554
chr2:176492148:176492651	chr2	176492148	176492651	.	504	2.31052	1.78542	2.10687e-06	9.78414e-05	8.91621	10.2678	11.7967	3.05681	1.33055	1.74943
chr2:181587576:181587867	chr2	181587576	181587867	.	292	1.88149	1.89677	2.54435e-05	0.000677907	21.4355	19.5558	13.5743	7.6211	4.01899	3.01957
chr2:182643339:182643962	chr2	182643339	182643962	.	624	0.679192	4.1931	0.000250218	0.00390642	31.121	31.7429	43.5983	22.2207	20.9562	23.1732
chr2:182903152:182904148	chr2	182903152	182904148	.	997	1.43295	1.97593	0.000783825	0.00925853	4.02437	7.15934	4.69846	1.03018	3.86754	0.884367
chr2:183457897:183458718	chr2	183457897	183458718	.	822	0.64955	4.08717	0.000673674	0.00828274	22.4532	25.1822	26.7403	15.6188	18.9676	12.6572
chr2:185190877:185191336	chr2	185190877	185191336	.	460	3.68271	0.733047	1.78873e-05	0.000511079	6.62901	5.04306	4.30836	0.372134	0.364455	0.383354
chr2:186844298:186844754	chr2	186844298	186844754	.	457	2.0827	1.21813	0.000608927	0.00767157	6.32134	5.07616	9.85602	1.87288	0.366848	2.70109
chr2:187419928:187420415	chr2	187419928	187420415	.	488	1.49441	2.30798	4.22998e-05	0.00100265	17.1016	14.2611	10.3375	4.91095	5.4967	4.3363
chr2:187559569:187560766	chr2	187559569	187560766	.	1198	1.57977	2.16873	6.5196e-05	0.00139987	6.69832	4.76652	4.06055	1.28601	0.979587	2.94395
chr2:189054044:189054423	chr2	189054044	189054423	.	380	1.9706	1.53788	0.000173019	0.00295667	8.02459	13.1487	11.379	1.35143	2.20591	4.6406
chr2:189673535:189673993	chr2	189673535	189673993	.	459	1.43022	2.0285	0.000573432	0.00734577	19.9304	7.77545	7.45793	6.34006	3.65249	3.07351
chr2:190683987:190684629	chr2	190683987	190684629	.	643	0.692749	4.26841	0.000116361	0.00218725	37.1902	34.9678	36.9863	25.8237	21.9013	19.746
chr2:192036311:192037286	chr2	192036311	192037286	.	976	1.01053	4.18555	1.48918e-07	1.20842e-05	22.0347	23.7685	27.6898	11.5758	12.8829	11.9248
chr2:192066762:192068251	chr2	192066762	192068251	.	1490	1.17698	4.77668	6.81641e-12	4.22252e-09	29.4055	25.27	20.7979	13.4418	9.11382	10.8883
chr2:192083967:192084685	chr2	192083967	192084685	.	719	2.19846	1.47701	6.08428e-05	0.00132536	5.58038	6.20468	5.01163	0.714249	0.932681	1.96209
chr2:192094868:192095599	chr2	192094868	192095599	.	732	0.66822	4.03193	0.000565735	0.00726327	27.1871	26.572	26.8283	13.5636	17.4062	19.7542
chr2:192096589:192097086	chr2	192096589	192097086	.	498	2.14945	1.79865	6.23383e-06	0.000228113	7.73455	11.8248	11.5771	3.09364	1.68323	2.12461
chr2:192251570:192251947	chr2	192251570	192251947	.	378	2.16085	1.73828	1.05434e-05	0.000341448	8.91621	12.7462	17.6355	1.81145	3.99165	2.79909
chr2:192458321:192459028	chr2	192458321	192459028	.	708	1.05245	2.91834	0.000224675	0.00360165	15.8678	11.594	13.7416	5.3192	8.28775	6.22679
chr2:192476959:192477805	chr2	192476959	192477805	.	847	1.07774	3.8391	5.33861e-07	3.35805e-05	22.7379	23.8069	20.6332	11.3178	11.0843	9.36886
chr2:192575049:192575717	chr2	192575049	192575717	.	669	1.20859	3.58678	4.01768e-07	2.68025e-05	26.1489	23.2061	23.6992	7.6763	11.0263	12.916
chr2:192612782:192613195	chr2	192612782	192613195	.	414	1.24792	2.49947	0.000199321	0.00329416	16.2818	23.7067	14.3612	8.68312	8.50395	5.53733
chr2:192759167:192759891	chr2	192759167	192759891	.	725	1.2203	3.17324	5.07703e-06	0.000194718	19.0376	16.4909	14.6619	7.08338	7.86218	6.56725
chr2:192764059:192764551	chr2	192764059	192764551	.	493	0.840909	3.69556	0.000157515	0.00275274	34.8329	29.6808	33.9871	12.5001	23.1241	19.3154
chr2:192989093:192989845	chr2	192989093	192989845	.	753	0.744191	4.01526	0.000154857	0.00271598	26.6421	30.0966	22.2518	15.686	17.5887	13.817
chr2:193081124:193081363	chr2	193081124	193081363	.	240	2.23128	1.00581	0.000728889	0.00879179	11.3682	11.1529	12.0112	4.27954	2.09562	0.734761
chr2:194689239:194689444	chr2	194689239	194689444	.	206	1.24656	2.86644	2.1879e-05	0.000599038	44.4079	45.0448	53.3507	19.1125	22.7873	17.9767
chr2:197117431:197118077	chr2	197117431	197118077	.	647	1.73635	2.37695	1.99197e-06	9.3897e-05	11.1625	13.5145	10.0248	2.64577	4.14589	3.54321
chr2:197158339:197159559	chr2	197158339	197159559	.	1221	2.08979	2.04451	1.93516e-06	9.17225e-05	5.65205	3.6537	5.75475	1.40198	1.78496	0.28885
chr2:197196567:197197166	chr2	197196567	197197166	.	600	0.789065	3.48254	0.000761696	0.00908796	23.8063	21.1162	23.7221	14.5504	15.0884	9.99276
chr2:197347404:197347880	chr2	197347404	197347880	.	477	1.4094	2.53012	3.0555e-05	0.0007837	13.122	19.8274	16.997	5.38307	8.78665	4.4363
chr2:198094801:198095229	chr2	198094801	198095229	.	429	1.84309	3.405	1.72355e-10	5.41086e-08	43.0223	28.7012	40.3173	18.3551	7.81582	4.93266
chr2:198223597:198224137	chr2	198223597	198224137	.	541	1.70466	2.35814	3.83551e-06	0.000156719	16.0195	13.8535	10.6569	5.69551	2.78899	3.91148
chr2:198225207:198226133	chr2	198225207	198226133	.	927	1.29616	3.8077	6.9095e-09	1.02213e-06	21.4682	20.0199	21.3792	7.57114	8.50002	9.51147
chr2:204269631:204270346	chr2	204269631	204270346	.	716	1.68746	3.19821	2.23046e-09	4.06166e-07	19.5011	20.9351	16.1044	5.25977	6.08783	6.15722
chr2:204624106:204624950	chr2	204624106	204624950	.	845	0.960524	2.94287	0.00071928	0.00869401	15.0046	11.826	7.46258	6.6852	5.75365	5.21724
chr2:205757352:205758059	chr2	205757352	205758059	.	708	1.42723	2.08597	0.000370807	0.00527292	7.48055	7.5613	9.16108	2.6596	4.97265	1.24536
chr2:206041019:206041717	chr2	206041019	206041717	.	699	1.01044	3.23541	0.000115907	0.00218167	16.9905	19.1466	15.9806	5.14279	9.11399	11.6048
chr2:206316676:206317459	chr2	206316676	206317459	.	784	1.20024	2.41778	0.00043988	0.00598644	7.57423	7.96637	11.2605	4.14853	4.27677	3.14898
chr2:206325978:206327159	chr2	206325978	206327159	.	1182	1.09945	3.31731	1.35329e-05	0.000413678	12.356	11.1718	9.75529	5.06883	5.67341	4.77408
chr2:206455334:206455898	chr2	206455334	206455898	.	565	1.50864	2.65703	2.97471e-06	0.000128429	17.0434	15.7917	14.0308	5.75655	4.74759	5.93011
chr2:206596157:206596673	chr2	206596157	206596673	.	517	1.14399	3.26781	1.84149e-05	0.000523616	31.9742	21.0546	20.9092	16.8864	8.43111	8.18612
chr2:208053368:208053911	chr2	208053368	208053911	.	544	3.02992	1.16417	1.20323e-05	0.000376715	4.72035	4.9204	9.27335	1.25869	0.924537	0
chr2:208719335:208719981	chr2	208719335	208719981	.	647	1.08658	2.92266	0.000151676	0.00267428	13.643	16.5484	15.5941	9.78936	6.21883	5.45109
chr2:214860188:214860642	chr2	214860188	214860642	.	455	1.08071	3.02135	0.000115846	0.00218111	24.3383	24.708	20.5906	6.77202	11.0538	15.1151
chr2:215887119:215887472	chr2	215887119	215887472	.	354	1.3123	3.09348	2.3199e-06	0.000105544	30.3756	34.2779	34.6085	11.122	11.8396	16.9369
chr2:216782780:216783311	chr2	216782780	216783311	.	532	2.2761	1.35362	0.000100084	0.00195106	6.3352	5.70224	8.8052	0.32177	1.57565	2.3203
chr2:216847202:216847701	chr2	216847202	216847701	.	500	1.56252	2.47918	9.0005e-06	0.000301232	14.1233	18.5584	14.4134	3.76599	3.68829	8.46445
chr2:216870646:216871427	chr2	216870646	216871427	.	782	0.741939	5.48812	8.89301e-09	1.25152e-06	72.4471	79.1828	62.2063	43.9994	37.9462	46.0025
chr2:217356988:217358207	chr2	217356988	217358207	.	1220	0.905127	3.74518	3.76404e-05	0.000912789	11.0503	17.4059	13.5864	6.73501	8.10763	7.51625
chr2:217776460:217776921	chr2	217776460	217776921	.	462	1.67603	2.64364	4.34916e-07	2.85743e-05	21.5379	16.6087	20.2786	4.8168	6.53179	6.8705
chr2:217904909:217905465	chr2	217904909	217905465	.	557	1.28225	3.01857	5.16619e-06	0.000197341	17.2882	21.4649	20.7015	8.29785	8.42762	7.59825
chr2:217950355:217951123	chr2	217950355	217951123	.	769	2.01175	3.63913	3.30502e-14	4.67963e-11	27.9661	28.0781	19.6802	5.78767	6.97631	5.96217
chr2:218258180:218258890	chr2	218258180	218258890	.	711	0.990949	3.26088	9.13734e-05	0.0018145	17.381	16.3137	18.2449	8.42666	8.25278	9.42479
chr2:218324493:218325346	chr2	218324493	218325346	.	854	0.946016	4.14315	1.09095e-06	5.80538e-05	30.0687	21.9402	28.0589	15.0335	13.9381	12.5959
chr2:218392318:218392752	chr2	218392318	218392752	.	435	1.85099	1.70978	9.68103e-05	0.00190113	10.6995	9.43511	11.597	3.14817	2.31241	3.24308
chr2:219151159:219152228	chr2	219151159	219152228	.	1070	1.42328	2.38111	6.16174e-05	0.00133929	8.09959	7.17122	4.54629	3.03967	2.35022	1.97768
chr2:220226939:220227773	chr2	220226939	220227773	.	835	1.32223	2.86017	8.92042e-06	0.000299129	11.7246	9.61688	14.2408	4.71518	5.01944	4.43497
chr2:221924971:221925547	chr2	221924971	221925547	.	577	1.69154	2.41189	2.76165e-06	0.000121268	10.2915	15.7726	13.739	4.7468	2.90554	4.5843
chr2:222846364:222847263	chr2	222846364	222847263	.	900	0.817529	3.67951	0.000304669	0.00454241	23.5388	15.8619	13.4125	11.0317	11.7355	7.24965
chr2:223492443:223493145	chr2	223492443	223493145	.	703	1.47508	2.82561	2.40349e-06	0.000108423	15.0675	13.4533	13.8394	4.38303	2.86172	8.02698
chr2:223784433:223785096	chr2	223784433	223785096	.	664	1.03864	3.24841	8.39335e-05	0.00170721	20.7866	16.9309	17.9083	5.92948	13.8866	7.17056
chr2:223940682:223940943	chr2	223940682	223940943	.	262	2.32804	1.18225	0.000192887	0.00321462	9.18846	14.9841	13.0656	1.30673	3.8393	2.01919
chr2:224068634:224069159	chr2	224068634	224069159	.	526	1.44768	2.4208	3.7852e-05	0.000916639	9.15353	16.6234	16.4412	5.20704	5.41833	4.69353
chr2:224333792:224334646	chr2	224333792	224334646	.	855	1.06234	4.01327	3.30356e-07	2.28288e-05	19.8972	27.1322	28.2369	9.20977	14.9022	11.7562
chr2:224561460:224562049	chr2	224561460	224562049	.	590	1.83671	2.26752	1.70259e-06	8.29533e-05	13.057	11.7956	10.6879	2.32111	4.26227	3.28775
chr2:224969433:224969964	chr2	224969433	224969964	.	532	1.95457	1.53371	0.000197855	0.00327462	9.05029	6.70852	7.11189	2.57416	0.630261	2.65177
chr2:225747174:225747850	chr2	225747174	225747850	.	677	1.4461	3.9467	1.39873e-10	4.64325e-08	30.3441	31.103	36.4594	11.3784	8.17198	16.41
chr2:226038741:226039234	chr2	226038741	226039234	.	494	1.19281	2.79468	6.57944e-05	0.00140971	20.1427	15.5328	20.0592	7.96999	7.80554	8.56726
chr2:227312431:227313111	chr2	227312431	227313111	.	681	1.72401	2.18167	1.6312e-05	0.000477926	8.24848	11.0055	9.25973	4.77599	2.70799	1.03579
chr2:230680463:230681581	chr2	230680463	230681581	.	1119	1.08705	3.03764	8.26913e-05	0.00169087	11.4739	8.45189	8.69443	4.7423	5.24372	3.46697
chr2:232026562:232027221	chr2	232026562	232027221	.	660	0.653362	4.34641	0.000303936	0.0045329	43.041	30.8226	37.1255	31.3833	21.3372	17.9015
chr2:232500163:232500567	chr2	232500163	232500567	.	405	2.74094	0.784058	0.000268362	0.00412562	5.54786	6.60913	5.78317	0.422671	0.827898	1.30624
chr2:232893420:232893636	chr2	232893420	232893636	.	217	6.83082	0.632854	2.58958e-07	1.91337e-05	8.87512	13.1574	11.6237	0	0	0
chr2:232951916:232952607	chr2	232951916	232952607	.	692	1.64187	2.01283	0.000103292	0.00199612	10.9005	4.64167	8.59183	3.71058	1.21134	2.80314
chr2:233161422:233161995	chr2	233161422	233161995	.	574	1.6076	2.32014	1.42534e-05	0.000429026	12.3025	8.39383	16.008	2.98226	4.38108	4.60826
chr2:234940683:234941462	chr2	234940683	234941462	.	780	0.909667	4.10023	4.46863e-06	0.000175557	29.2177	28.3684	26.7942	10.0953	17.4097	17.4082
chr2:235149524:235149942	chr2	235149524	235149942	.	419	0.710166	3.80532	0.000787974	0.00928808	37.5375	43.8663	39.9896	31.8667	23.607	18.5181
chr2:235198242:235198640	chr2	235198242	235198640	.	399	1.95202	1.78424	3.22544e-05	0.000817016	12.4693	12.0753	12.6434	3.00319	1.6807	4.86158
chr2:235671609:235672113	chr2	235671609	235672113	.	505	2.10696	1.89946	4.81797e-06	0.000185913	11.441	10.9541	10.3463	2.03384	0.995937	4.53952
chr2:236419835:236420517	chr2	236419835	236420517	.	683	0.69098	4.08187	0.000283325	0.00429569	31.9574	29.5234	28.4892	20.3012	19.3914	16.0077
chr2:236769583:236770303	chr2	236769583	236770303	.	721	1.0932	3.48221	6.99993e-06	0.000249694	21.5918	18.5624	21.2403	8.78463	12.5563	7.33742
chr2:238006364:238007309	chr2	238006364	238007309	.	946	0.646248	4.9054	1.28463e-05	0.000397409	34.7789	40.1788	39.8046	24.0668	21.2663	27.9613
chr2:238131956:238132397	chr2	238131956	238132397	.	442	0.873971	4.52168	3.76766e-07	2.54776e-05	66.0849	56.1178	76.6325	37.9543	32.9989	37.5028
chr2:238190345:238191040	chr2	238190345	238191040	.	696	0.980867	3.35397	7.06274e-05	0.00148895	21.6756	17.6908	17.0849	10.084	8.91239	9.62791
chr2:238208631:238208987	chr2	238208631	238208987	.	357	1.12725	2.51864	0.00070855	0.00859894	22.9274	25.9922	13.1215	12.9465	7.9833	7.40936
chr2:238339936:238340589	chr2	238339936	238340589	.	654	0.885723	4.269	1.86172e-06	8.908e-05	32.8836	40.6553	39.3945	19.1074	17.6878	24.2673
chr2:238349943:238350688	chr2	238349943	238350688	.	746	1.2879	2.64708	4.74265e-05	0.001097	10.1114	11.0034	12.8001	4.58932	4.04516	5.20046
chr2:241313371:241314199	chr2	241313371	241314199	.	829	0.666256	4.05007	0.000526764	0.00686842	20.7149	26.6916	24.7758	15.4869	13.9539	15.9538
chr2:242101158:242101783	chr2	242101158	242101783	.	626	2.84537	1.5747	9.70199e-07	5.2794e-05	8.71681	6.55634	6.9074	0.820359	2.14248	0
chr20:294519:294961	chr20	294519	294961	.	443	1.29889	2.67695	3.55718e-05	0.000873001	20.6502	15.7097	21.9618	7.34187	8.3257	7.9613
chr20:509922:510386	chr20	509922	510386	.	465	1.08622	2.66084	0.000476069	0.00635112	13.8057	18.804	20.1478	7.36265	10.095	7.2054
chr20:2118227:2118740	chr20	2118227	2118740	.	514	1.40269	2.14365	0.000278958	0.00424068	10.9284	14.9284	8.76303	3.33038	5.54482	4.11695
chr20:2794998:2795782	chr20	2794998	2795782	.	785	0.617472	4.62706	0.000111502	0.00211482	40.2763	34.78	37.6402	21.3704	25.4144	26.7322
chr20:3750398:3750753	chr20	3750398	3750753	.	356	1.38138	2.13331	0.000416984	0.00574622	18.4836	8.52133	22.268	5.77017	5.6511	7.43017
chr20:4082754:4083541	chr20	4082754	4083541	.	788	1.0062	3.28321	8.77513e-05	0.0017601	11.8128	17.6635	18.5198	6.51707	7.65911	9.62276
chr20:4527126:4528031	chr20	4527126	4528031	.	906	0.955083	2.89117	0.000819554	0.00956285	8.85716	9.65108	12.5282	5.29038	4.256	6.42308
chr20:6085297:6086069	chr20	6085297	6086069	.	773	0.701409	4.28637	9.20013e-05	0.00182425	28.4442	28.1636	35.6607	19.4877	17.7843	19.3909
chr20:6955703:6956467	chr20	6955703	6956467	.	765	1.40513	2.50909	3.85427e-05	0.000930026	13.0072	11.1966	6.12336	4.25157	3.50639	3.68821
chr20:7178759:7179222	chr20	7178759	7179222	.	464	0.94256	3.05119	0.000503653	0.00663946	23.1745	20.7675	23.6859	8.48529	14.0912	12.5416
chr20:7708967:7709647	chr20	7708967	7709647	.	681	1.07387	3.43797	1.33354e-05	0.000409204	18.618	22.011	22.2234	6.78693	10.832	12.1705
chr20:7821743:7822703	chr20	7821743	7822703	.	961	1.13409	2.42939	0.000808969	0.00947439	8.18325	8.35598	5.06195	3.02819	3.31461	3.48648
chr20:10900259:10900949	chr20	10900259	10900949	.	691	1.81714	1.68446	0.00014069	0.00253074	6.27103	6.71434	6.51838	1.98184	1.69833	1.7864
chr20:11120841:11121683	chr20	11120841	11121683	.	843	0.953423	4.34055	2.21358e-07	1.6639e-05	26.4631	29.2119	38.0426	16.8542	15.7109	15.6889
chr20:11332803:11333301	chr20	11332803	11333301	.	499	1.81129	1.61826	0.000277494	0.0042239	8.04067	9.65543	7.94328	1.02915	4.03165	2.12035
chr20:11976608:11977366	chr20	11976608	11977366	.	759	0.792381	3.5636	0.000500363	0.00660863	18.1848	21.865	17.5658	10.3746	12.8112	9.99043
chr20:13532792:13533281	chr20	13532792	13533281	.	490	1.22189	2.60527	0.000178344	0.00303224	22.9274	14.2029	11.7661	4.8909	8.89568	7.19766
chr20:14269373:14270326	chr20	14269373	14270326	.	954	0.602835	5.23474	7.13883e-06	0.000253476	46.5998	42.6476	52.3129	35.3488	29.8746	27.9117
chr20:15100064:15100354	chr20	15100064	15100354	.	291	2.06552	1.73487	2.35169e-05	0.000636598	15.4425	15.9437	18.574	4.11777	6.33726	1.21198
chr20:30396338:30396637	chr20	30396338	30396637	.	300	0.761486	4.02865	0.000115145	0.00217086	55.1022	67.8097	78.6733	33.6657	39.677	45.2613
chr20:30920125:30920836	chr20	30920125	30920836	.	712	1.00243	4.32315	7.60941e-08	7.13434e-06	31.5574	44.6116	34.6672	16.8296	20.2498	18.0801
chr20:33680476:33681825	chr20	33680476	33681825	.	1350	1.08867	3.23398	3.09548e-05	0.000792195	9.86727	9.38497	8.14092	4.05764	3.2288	5.61684
chr20:33906324:33908800	chr20	33906324	33908800	.	2477	0.750947	4.95262	5.10099e-07	3.23498e-05	13.8009	15.633	17.1658	10.9191	8.59567	8.1159
chr20:36451893:36452389	chr20	36451893	36452389	.	497	3.02232	1.92201	8.71479e-09	1.23647e-06	11.3022	10.0533	15.9505	1.03329	3.37323	0
chr20:37604194:37604686	chr20	37604194	37604686	.	493	1.11617	2.53851	0.000650576	0.00805586	19.858	11.5827	13.8872	6.25004	5.78101	8.94233
chr20:39748137:39749185	chr20	39748137	39749185	.	1049	1.42629	3.54417	2.56671e-08	2.9779e-06	15.6055	11.3974	20.2668	7.18016	3.516	6.89233
chr20:43223264:43223891	chr20	43223264	43223891	.	628	1.36107	3.97191	6.25405e-10	1.47587e-07	37.8229	28.6992	39.0173	16.3549	9.61047	15.1632
chr20:44381210:44381745	chr20	44381210	44381745	.	536	1.75587	3.13155	1.94436e-09	3.63612e-07	22.7563	27.9655	22.1849	7.98422	5.00446	8.55394
chr20:45186894:45187564	chr20	45186894	45187564	.	671	1.2389	3.68406	1.17176e-07	9.99963e-06	23.6791	22.0731	33.0263	13.0108	9.24445	11.0378
chr20:45742155:45742798	chr20	45742155	45742798	.	644	0.770234	3.78078	0.000275496	0.00419955	26.4164	28.5404	23.7799	17.5435	13.2766	15.3342
chr20:46235896:46236625	chr20	46235896	46236625	.	730	1.9248	1.5762	0.000162899	0.00282619	6.15585	7.57787	3.45528	1.64147	1.37794	1.44939
chr20:47513809:47514471	chr20	47513809	47514471	.	663	1.06851	4.12807	1.67859e-07	1.32042e-05	38.7311	29.3374	36.9575	15.2334	23.2636	11.437
chr20:48295109:48295920	chr20	48295109	48295920	.	812	0.944094	3.15238	0.000346267	0.00498941	17.9862	12.3067	11.0941	7.37852	7.0198	7.16664
chr20:49055470:49056179	chr20	49055470	49056179	.	710	0.749471	3.85709	0.00044387	0.00602498	23.0566	26.1387	25.8833	9.16183	14.6398	20.8631
chr20:50148937:50150443	chr20	50148937	50150443	.	1507	0.659095	4.89207	8.0289e-06	0.000278285	22.3645	24.8665	24.389	14.7668	16.3533	14.1589
chr20:52390081:52391634	chr20	52390081	52391634	.	1554	1.45154	3.68532	2.04202e-09	3.78811e-07	8.46868	13.55	13.5648	4.29606	3.668	4.99297
chr20:52411666:52412156	chr20	52411666	52412156	.	491	2.34132	1.19824	0.000224188	0.00359716	6.86421	7.2687	5.87105	3.13775	0.341445	0.35915
chr20:55014780:55015401	chr20	55014780	55015401	.	622	0.9049	3.28426	0.000396804	0.00554317	18.5778	23.5251	17.0899	9.08198	7.81645	14.7425
chr20:55582778:55583887	chr20	55582778	55583887	.	1110	0.923833	3.97066	5.41365e-06	0.000204664	17.2059	19.613	17.5299	7.8651	10.7235	10.0086
chr20:55614476:55614960	chr20	55614476	55614960	.	485	0.634341	4.16008	0.000590556	0.00750188	44.0112	47.831	40.1199	30.7068	25.5795	28.7239
chr20:56812335:56813543	chr20	56812335	56813543	.	1209	0.760462	4.6466	4.36645e-06	0.000172323	20.1776	25.8297	31.2947	15.0085	13.5894	16.9196
chr20:60956171:60956708	chr20	60956171	60956708	.	538	1.41042	2.15272	0.000230063	0.003666	11.6342	10.6139	11.0512	5.0909	2.80454	4.58884
chr21:16388251:16388822	chr21	16388251	16388822	.	572	1.16071	4.74395	1.1213e-11	6.27385e-09	56.6772	69.8812	65.5156	23.9415	34.8781	26.8214
chr21:16403067:16404415	chr21	16403067	16404415	.	1349	0.966489	2.99047	0.000467395	0.00626626	7.25723	7.80456	7.34562	2.91859	4.84679	3.66019
chr21:16595068:16595743	chr21	16595068	16595743	.	676	1.19261	4.58273	1.78414e-11	9.23758e-09	46.7705	50.1551	49.0398	23.5501	18.1041	22.1733
chr21:16596526:16597152	chr21	16596526	16597152	.	627	1.68835	4.33629	4.80509e-15	9.74422e-12	40.9548	45.8212	58.6192	19.9302	9.35842	15.7499
chr21:16622598:16623450	chr21	16622598	16623450	.	853	1.50738	3.01058	2.61428e-07	1.92751e-05	10.9127	13.8071	15.63	4.81636	3.53774	5.78851
chr21:18423062:18423466	chr21	18423062	18423466	.	405	1.82502	1.6319	0.000218884	0.00353699	10.3032	13.6589	8.00747	1.69068	3.31159	3.91873
chr21:22996855:22997351	chr21	22996855	22997351	.	497	1.8704	1.7242	0.000152604	0.0026886	8.71887	3.59047	15.9505	1.72215	1.68661	4.25777
chr21:26476149:26476508	chr21	26476149	26476508	.	360	0.914803	3.44988	0.000149205	0.00264077	47.7017	37.6721	29.5275	18.0692	20.0248	23.0225
chr21:26829839:26830171	chr21	26829839	26830171	.	333	2.0192	1.70825	3.20999e-05	0.000813699	15.9046	12.3251	14.0672	2.05624	4.53106	3.7069
chr21:30580705:30581369	chr21	30580705	30581369	.	665	2.21766	1.10764	0.000456576	0.00614853	3.37877	4.83013	5.41859	0.772248	0.756313	1.32589
chr21:32628285:32628725	chr21	32628285	32628725	.	441	0.691129	4.18471	0.000209012	0.0034193	48.7662	53.8172	47.3911	30.277	24.7102	37.9877
chr21:34575833:34576730	chr21	34575833	34576730	.	898	1.98035	1.80773	3.03227e-05	0.00077947	6.07653	4.57046	6.21961	0.953127	0.560076	2.74922
chr21:34718706:34719376	chr21	34718706	34719376	.	671	1.30176	2.17105	0.000684262	0.00837282	8.13222	10.9036	7.51819	3.82671	5.24685	1.57684
chr21:36167401:36168417	chr21	36167401	36168417	.	1017	1.24654	3.04438	1.083e-05	0.000348024	11.6779	12.6334	8.5035	5.0496	5.76964	2.94772
chr21:36184565:36185281	chr21	36184565	36185281	.	717	0.92115	3.48664	0.00010657	0.0020425	18.1309	22.8969	18.5947	10.9824	8.18372	12.2973
chr21:36570134:36570794	chr21	36570134	36570794	.	661	1.39291	3.32367	2.11194e-07	1.60313e-05	18.6957	15.6579	29.4374	8.28716	6.34075	9.60414
chr21:36584974:36585610	chr21	36584974	36585610	.	637	1.05797	4.20429	4.4367e-08	4.66392e-06	41.5717	33.6163	39.8802	15.8551	18.6862	20.7625
chr21:36625193:36625553	chr21	36625193	36625553	.	361	1.1893	3.80061	1.04296e-07	9.11341e-06	46.6804	54.8686	55.897	27.0287	25.0777	16.6085
chr21:36666546:36667551	chr21	36666546	36667551	.	1006	1.66456	2.83962	1.15927e-07	9.92968e-06	9.09347	8.69173	13.2529	3.91369	2.66639	3.15524
chr21:37810239:37810721	chr21	37810239	37810721	.	483	2.92614	1.2505	8.8865e-06	0.00029828	8.30703	7.01964	7.08735	1.77207	1.0413	0
chr21:38780117:38780937	chr21	38780117	38780937	.	821	0.965675	2.94714	0.000536027	0.00696304	13.0974	11.5197	10.9725	5.4211	5.51344	7.30287
chr21:39806738:39807457	chr21	39806738	39807457	.	720	1.23151	2.71683	8.58714e-05	0.00173443	15.6034	10.4094	10.2596	4.75504	7.21824	3.42889
chr21:43061419:43062989	chr21	43061419	43062989	.	1571	0.621295	6.13065	7.50253e-09	1.08897e-06	54.4508	54.7494	52.181	32.2532	35.963	36.7053
chr21:43068759:43069318	chr21	43068759	43069318	.	560	1.51636	2.32587	3.18707e-05	0.000809664	14.9028	9.55964	12.5474	3.66818	3.59249	5.66816
chr21:45601457:45601690	chr21	45601457	45601690	.	234	2.29877	1.37022	8.59283e-05	0.00173507	14.4031	8.38851	25.4083	3.65773	1.4329	4.52161
chr21:45604101:45605147	chr21	45604101	45605147	.	1047	1.89202	3.35543	2.72614e-11	1.2694e-08	16.555	15.5097	12.5619	4.08743	2.40185	5.55808
chr21:45612911:45613454	chr21	45612911	45613454	.	544	1.07712	3.27793	2.65548e-05	0.000701528	23.6017	23.946	22.521	8.18147	11.7108	13.2905
chr21:47541987:47542446	chr21	47541987	47542446	.	460	1.79177	1.97843	2.98732e-05	0.000771346	9.07128	15.905	11.7501	2.60494	2.55119	5.36695
chr22:18155194:18156258	chr22	18155194	18156258	.	1065	0.730421	3.99618	0.000235181	0.00372191	20.9468	14.5773	19.2856	9.9655	10.3895	12.7497
chr22:19450985:19452182	chr22	19450985	19452182	.	1198	0.967904	4.57294	2.16198e-08	2.62694e-06	27.999	23.9816	25.7168	10.7167	12.8746	16.1917
chr22:21428186:21428842	chr22	21428186	21428842	.	657	0.919894	3.15128	0.000437677	0.00595996	19.2981	14.6668	17.0022	9.11926	7.65522	10.1994
chr22:22109850:22110794	chr22	22109850	22110794	.	945	1.04338	4.39415	9.60449e-09	1.33807e-06	28.362	30.402	29.742	12.499	14.5474	15.8615
chr22:24456868:24457130	chr22	24456868	24457130	.	263	3.02422	1.1635	9.37395e-06	0.000311179	10.9842	10.1776	17.8113	2.60352	1.2749	0.670505
chr22:24500923:24501508	chr22	24500923	24501508	.	586	1.26946	2.30676	0.00040602	0.00563489	14.7893	8.22194	10.146	4.96602	5.14964	3.61111
chr22:24729339:24729642	chr22	24729339	24729642	.	304	2.24233	1.58116	3.75731e-05	0.000912115	8.97487	18.7839	16.0018	6.75717	0.551478	1.74022
chr22:28626016:28626456	chr22	28626016	28626456	.	441	2.71001	0.942195	0.000193243	0.00321901	7.27854	4.45105	6.94525	0	0.380157	2.39922
chr22:30608491:30609130	chr22	30608491	30609130	.	640	0.70216	5.08664	7.0678e-07	4.17331e-05	65.9521	68.3116	61.0882	35.3062	46.1036	38.575
chr22:30708071:30708413	chr22	30708071	30708413	.	343	1.22912	3.37791	1.11804e-06	5.90781e-05	46.3227	40.5797	36.2437	18.9647	18.0846	15.4236
chr22:30721202:30721513	chr22	30721202	30721513	.	312	1.80172	1.41798	0.000842395	0.0097702	8.74475	15.4425	10.9718	4.93793	2.14935	2.82601
chr22:31113121:31114109	chr22	31113121	31114109	.	989	0.935429	5.36998	1.27181e-11	6.84016e-09	49.819	50.5208	63.2136	30.1169	27.2918	27.9937
chr22:31375768:31376616	chr22	31375768	31376616	.	849	0.810362	3.48821	0.000525505	0.00685458	19.0927	15.7638	14.006	8.46835	9.87334	9.55449
chr22:32242011:32242752	chr22	32242011	32242752	.	742	0.66711	4.51047	8.11694e-05	0.00166811	39.5822	39.6815	32.0514	18.2255	24.6277	27.3307
chr22:32415923:32416698	chr22	32415923	32416698	.	776	0.860543	3.96897	1.75768e-05	0.000504124	23.5774	26.905	26.0036	13.8975	13.3947	14.771
chr22:33834009:33834640	chr22	33834009	33834640	.	632	0.644041	4.06763	0.000686221	0.00838795	30.2192	32.7529	32.2136	18.4183	21.4867	20.9267
chr22:36391889:36392202	chr22	36391889	36392202	.	314	2.55445	2.5068	1.0197e-10	3.53734e-08	27.6005	28.9834	30.9843	6.54197	6.40698	1.6848
chr22:36477093:36477540	chr22	36477093	36477540	.	448	0.959417	4.30089	2.79393e-07	2.02977e-05	62.6921	47.3999	61.1284	35.1534	27.6921	25.1918
chr22:37624707:37626460	chr22	37624707	37626460	.	1754	0.877843	3.66316	8.90991e-05	0.0017825	9.33305	10.4789	7.49844	4.97734	5.83045	4.0215
chr22:37643868:37644689	chr22	37643868	37644689	.	822	0.753625	3.84903	0.000409615	0.00566628	18.5483	16.0645	30.028	14.3693	11.6253	12.2281
chr22:37699608:37700247	chr22	37699608	37700247	.	640	1.99576	2.17202	1.56157e-06	7.7312e-05	10.0307	10.0376	11.2605	5.08195	1.30976	1.37768
chr22:38258854:38259265	chr22	38258854	38259265	.	412	1.41863	2.08754	0.000377174	0.00533837	12.8549	14.2931	14.4309	2.07745	5.69682	7.70429
chr22:40721201:40721654	chr22	40721201	40721654	.	454	1.98533	1.67355	6.6492e-05	0.00142076	7.07012	12.1847	11.1117	1.88526	4.43126	1.16526
chr22:44185191:44185846	chr22	44185191	44185846	.	656	1.04416	3.92183	7.6838e-07	4.43513e-05	33.5173	30.4665	27.19	18.7882	12.267	13.1719
chr22:46897444:46897960	chr22	46897444	46897960	.	517	0.699394	4.11048	0.000277749	0.00422685	38.1828	40.0383	43.5609	28.8062	28.5361	17.3955
chr22:47324994:47326043	chr22	47324994	47326043	.	1050	0.78157	3.76897	0.000329121	0.00480714	15.4378	13.7659	18.8747	6.5212	12.1346	9.237
chr22:47417796:47418372	chr22	47417796	47418372	.	577	1.31492	2.51953	8.70205e-05	0.00174999	13.9074	10.5151	15.6125	4.7468	7.26384	3.97306
chr22:47503320:47503809	chr22	47503320	47503809	.	490	1.93678	1.64672	8.65198e-05	0.00174247	7.53329	11.6537	8.08917	2.0961	2.05285	2.87907
chr3:8412539:8413325	chr3	8412539	8413325	.	787	1.40966	2.84116	3.22244e-06	0.000136515	13.8671	13.6046	10.3019	3.91521	4.68651	5.60174
chr3:8602114:8602744	chr3	8602114	8602744	.	631	1.35418	3.87513	1.23897e-09	2.51345e-07	30.5214	33.936	33.6923	13.293	15.1442	9.78129
chr3:9958061:9959052	chr3	9958061	9959052	.	992	1.54877	1.89709	0.000328121	0.00479466	5.66251	4.67703	4.90377	1.72562	2.53502	0.888824
chr3:10323611:10324206	chr3	10323611	10324206	.	596	2.26521	2.07476	1.99667e-07	1.5223e-05	12.387	10.7787	9.06886	3.15939	1.12516	2.36702
chr3:11201086:11201467	chr3	11201086	11201467	.	382	1.29915	2.32671	0.000339365	0.00492062	19.7464	11.6784	20.7523	3.58495	8.33858	9.2326
chr3:11571492:11571989	chr3	11571492	11571989	.	498	1.11561	2.4642	0.000839736	0.009741	12.2464	13.9747	16.642	7.90598	4.71303	7.08204
chr3:16782788:16784281	chr3	16782788	16784281	.	1494	0.941964	3.6505	2.61136e-05	0.000691512	11.6018	9.79426	10.8535	5.15607	5.49854	6.13777
chr3:17080680:17081744	chr3	17080680	17081744	.	1065	1.15644	3.27478	1.44327e-05	0.000433481	11.4529	10.556	14.3796	2.73248	7.08378	6.45762
chr3:17680658:17681498	chr3	17680658	17681498	.	841	1.13892	2.65596	0.000293744	0.00441551	7.25171	9.54827	12.6396	5.08863	3.58821	4.61301
chr3:17681537:17682454	chr3	17681537	17682454	.	918	0.86791	3.22309	0.00078902	0.00929409	14.8604	13.0239	10.0093	8.57773	4.74824	7.49168
chr3:18175830:18177176	chr3	18175830	18177176	.	1347	1.02105	2.91837	0.000428499	0.00586723	6.43397	9.00844	6.15273	4.19376	1.99138	4.45112
chr3:21459450:21459805	chr3	21459450	21459805	.	356	1.29439	3.72495	5.23404e-08	5.30128e-06	42.8279	47.1179	64.7795	14.9063	17.8952	30.216
chr3:21477203:21477730	chr3	21477203	21477730	.	528	0.939787	4.08441	2.35556e-06	0.000106607	40.4269	48.3293	35.4876	16.5346	24.1313	24.0467
chr3:21759631:21760168	chr3	21759631	21760168	.	538	1.65651	1.78597	0.000270459	0.00414757	6.86117	12.2723	7.36746	2.54545	2.49293	3.27775
chr3:22057722:22058389	chr3	22057722	22058389	.	668	0.9714	3.78847	6.76899e-06	0.000244092	24.9867	26.7136	28.5895	11.5317	14.5564	14.7832
chr3:23709648:23710566	chr3	23709648	23710566	.	919	0.757628	3.85916	0.000273307	0.0041719	22.7029	17.6699	17.6443	14.1565	9.851	10.3618
chr3:24296099:24296795	chr3	24296099	24296795	.	697	0.9866	3.42622	5.10562e-05	0.00116178	17.2696	21.2497	21.1962	12.5255	8.89961	8.60208
chr3:24406487:24407161	chr3	24406487	24407161	.	675	1.17299	2.44887	0.000549346	0.00710016	8.3218	12.1608	11.2105	3.29683	6.45761	4.17998
chr3:24513662:24514375	chr3	24513662	24514375	.	714	1.35165	2.92075	5.03745e-06	0.000193521	11.2389	13.9958	18.6729	5.754	4.46126	6.9154
chr3:25339380:25339691	chr3	25339380	25339691	.	312	1.59387	1.74734	0.000517073	0.00676368	14.9175	12.5828	16.1689	6.03525	2.68669	5.65201
chr3:28627634:28628501	chr3	28627634	28628501	.	868	0.977647	4.22508	2.86348e-07	2.06946e-05	31.9874	23.0254	29.0594	12.8189	14.4858	15.4401
chr3:29140842:29141439	chr3	29140842	29141439	.	598	0.997604	3.18763	0.000238112	0.00375886	17.4448	28.6469	12.6539	7.72893	8.4105	13.2699
chr3:30230216:30230615	chr3	30230216	30230615	.	400	1.20586	2.91683	3.46499e-05	0.000858134	24.8762	20.9675	29.7277	13.2666	7.54422	11.9031
chr3:30389076:30389512	chr3	30389076	30389512	.	437	1.57631	2.64844	3.01171e-06	0.000129543	15.7921	23.684	21.851	2.74204	9.97456	7.66708
chr3:30789317:30789640	chr3	30789317	30789640	.	324	2.05804	1.35739	0.000455482	0.00613856	3.96276	14.3198	15.5701	1.05668	5.6918	1.08854
chr3:30955676:30956887	chr3	30955676	30956887	.	1212	1.4405	2.13459	0.000225364	0.00360854	4.76708	3.0919	6.83806	1.69487	2.07487	1.60047
chr3:31146873:31147260	chr3	31146873	31147260	.	388	1.72211	1.55086	0.000785646	0.00927008	7.4455	11.9578	11.6088	3.08833	5.18503	0.908983
chr3:32225769:32226344	chr3	32225769	32226344	.	576	1.83171	1.63174	0.000240862	0.00379278	7.24442	4.64705	10.6349	2.67471	2.61952	0.918452
chr3:33433864:33434877	chr3	33433864	33434877	.	1014	1.14623	3.19263	2.61536e-05	0.000692308	11.8707	12.4948	11.5492	4.72691	8.43207	2.95644
chr3:34053222:34054060	chr3	34053222	34054060	.	839	0.842617	4.13759	1.51424e-05	0.000450505	19.7028	29.5639	30.2785	17.1386	14.1873	12.8211
chr3:34834462:34834782	chr3	34834462	34834782	.	321	2.20518	0.987412	0.000856385	0.00990362	5.99969	11.1182	8.41906	1.59983	1.04454	2.74677
chr3:35693273:35694099	chr3	35693273	35694099	.	827	1.1681	2.51965	0.000360673	0.00515844	9.31512	8.63103	9.15001	4.34681	4.66256	2.98525
chr3:37001257:37001828	chr3	37001257	37001828	.	572	0.99671	3.34207	7.27527e-05	0.001525	22.4464	20.59	25.5133	9.57659	9.37899	15.4146
chr3:37005936:37006343	chr3	37005936	37006343	.	408	1.14684	2.50382	0.00070987	0.00860427	19.6681	13.1211	21.1962	10.0695	10.6835	3.4577
chr3:37204581:37205356	chr3	37204581	37205356	.	776	1.60532	2.64916	1.18378e-06	6.19666e-05	13.4433	12.6476	8.35831	3.97071	3.0246	4.31767
chr3:37239595:37240068	chr3	37239595	37240068	.	474	1.67115	1.69743	0.000409398	0.00566608	9.48053	6.77645	11.7831	2.528	2.12214	4.09234
chr3:37304177:37304871	chr3	37304177	37304871	.	695	0.972672	3.05632	0.000317765	0.00468279	15.4719	17.2028	12.9617	8.86696	6.99544	7.35819
chr3:40588128:40588691	chr3	40588128	40588691	.	564	1.48659	2.30157	4.64109e-05	0.001078	13.0898	13.2886	9.5834	3.33865	5.05326	4.3773
chr3:40980848:40981582	chr3	40980848	40981582	.	735	1.82073	1.62883	0.000223298	0.00358836	7.20575	4.85569	5.39278	1.6303	2.28094	0.959688
chr3:41309458:41309880	chr3	41309458	41309880	.	423	1.60416	2.01866	0.00010084	0.00196249	10.2442	18.9837	10.6482	4.04685	4.75601	4.16886
chr3:41725236:41725462	chr3	41725236	41725462	.	227	2.22027	1.21757	0.00028749	0.00434744	13.4332	12.5777	17.4612	4.52462	0.738543	3.8842
chr3:42102871:42103816	chr3	42102871	42103816	.	946	0.602434	4.78014	8.95596e-05	0.00178913	39.3595	27.9176	36.3764	22.981	24.279	21.0642
chr3:43573231:43573902	chr3	43573231	43573902	.	672	1.27537	4.32276	6.81937e-11	2.58038e-08	37.257	41.9562	45.3101	21.6524	15.4677	14.1704
chr3:44264461:44265376	chr3	44264461	44265376	.	916	1.28808	2.32049	0.000326479	0.00477469	7.35879	5.64951	8.65436	2.80319	2.01326	4.04279
chr3:45587044:45587615	chr3	45587044	45587615	.	572	0.799696	4.45739	5.05925e-06	0.000194143	41.2453	48.3553	54.8063	33.2188	27.2577	22.197
chr3:45859134:45860067	chr3	45859134	45860067	.	934	1.06782	4.91305	1.90609e-11	9.75449e-09	48.9723	39.3576	41.0876	19.4275	19.3856	23.0341
chr3:46034233:46034764	chr3	46034233	46034764	.	532	0.643299	4.16161	0.00064795	0.00803051	35.5978	36.5614	48.7673	22.2021	23.0045	32.1527
chr3:49458547:49459130	chr3	49458547	49459130	.	584	0.982536	4.14231	5.3617e-07	3.36701e-05	36.0007	37.8893	44.425	21.6908	15.5018	22.6468
chr3:50087528:50088504	chr3	50087528	50088504	.	977	0.979581	3.36554	7.01815e-05	0.00148225	13.4701	12.0547	15.1216	7.18367	5.83427	7.58075
chr3:50137937:50138977	chr3	50137937	50138977	.	1041	1.41405	3.33389	1.00996e-07	8.85851e-06	12.0253	15.2562	13.6727	6.41314	5.63663	3.21855
chr3:50664600:50665466	chr3	50664600	50665466	.	867	1.07609	4.83867	6.84334e-11	2.58038e-08	39.799	39.5176	53.614	24.4827	20.3036	18.1021
chr3:50676532:50676777	chr3	50676532	50676777	.	246	3.20876	1.12758	8.36478e-06	0.000285942	9.78609	13.0571	18.3098	0	0.681502	3.5842
chr3:54916310:54916998	chr3	54916310	54916998	.	689	0.890752	4.45798	3.12082e-07	2.19597e-05	37.9683	40.662	43.9307	20.8697	23.6023	21.499
chr3:57903674:57904541	chr3	57903674	57904541	.	868	1.60233	3.34616	2.32325e-09	4.16504e-07	19.0445	14.1853	17.8507	5.7192	6.18062	4.87584
chr3:58577449:58578531	chr3	58577449	58578531	.	1083	1.16858	2.79285	0.000175544	0.00299171	6.37225	9.88624	9.1498	6.16443	3.25082	1.79111
chr3:58984141:58984520	chr3	58984141	58984520	.	380	1.38836	1.98903	0.000698011	0.00850958	9.29163	16.4359	16.1203	3.60382	6.17656	6.03278
chr3:59178051:59178427	chr3	59178051	59178427	.	377	2.74325	1.88149	3.9242e-08	4.23423e-06	10.217	14.2	22.4613	1.36219	3.11285	2.33876
chr3:59757435:59757923	chr3	59757435	59757923	.	489	1.25078	2.20152	0.000767571	0.00913919	9.18972	15.6916	12.1586	6.30116	4.79978	4.32743
chr3:60689820:60690078	chr3	60689820	60690078	.	259	1.6198	1.71002	0.000594133	0.00753032	16.1111	16.5356	18.782	1.9828	8.41483	6.12774
chr3:61319081:61319610	chr3	61319081	61319610	.	530	1.94194	2.0808	4.75059e-06	0.000183824	7.87318	10.7741	16.657	4.84476	2.53056	1.66361
chr3:62095351:62095591	chr3	62095351	62095591	.	241	2.30448	1.06478	0.000386582	0.00544148	15.3166	8.88531	11.9614	2.84119	1.39128	2.92685
chr3:62856057:62856493	chr3	62856057	62856493	.	437	1.63827	1.86908	0.000213078	0.0034719	8.44694	9.80027	16.4913	2.35032	3.45273	5.24589
chr3:62950896:62951473	chr3	62950896	62951473	.	578	1.17644	2.42766	0.000727959	0.00878515	14.161	12.658	9.35128	6.81172	6.96122	2.13564
chr3:63341426:63341804	chr3	63341426	63341804	.	379	1.64531	1.88435	0.000297261	0.0044525	18.2088	14.5959	7.13066	0.903333	4.42347	7.44455
chr3:64127172:64127567	chr3	64127172	64127567	.	396	1.14381	2.96679	8.43287e-05	0.00171174	32.0173	24.7842	20.9286	14.6974	5.927	14.6952
chr3:64155545:64156370	chr3	64155545	64156370	.	826	1.15342	4.13058	9.46593e-09	1.32352e-06	31.088	25.4924	29.4463	15.3359	10.7572	12.5959
chr3:64161964:64162726	chr3	64161964	64162726	.	763	1.49783	2.46615	2.36341e-05	0.000639272	12.6206	11.226	6.13941	3.81401	1.97752	4.85347
chr3:64676710:64677324	chr3	64676710	64677324	.	615	0.812643	3.66791	0.000264212	0.00407836	20.877	26.6944	29.5886	16.979	15.2656	11.4694
chr3:64958432:64959179	chr3	64958432	64959179	.	748	0.889113	3.19712	0.000551641	0.00712186	16.9503	16.6995	12.2842	8.00983	7.62043	9.19434
chr3:65251120:65252251	chr3	65251120	65252251	.	1132	0.621973	5.57691	3.77476e-07	2.54814e-05	47.07	54.2276	51.09	31.1514	37.1731	30.5328
chr3:66463576:66464178	chr3	66463576	66464178	.	603	1.33654	3.6039	2.24568e-08	2.70495e-06	29.5433	29.8891	24.7992	11.3553	10.565	11.4053
chr3:69855678:69856521	chr3	69855678	69856521	.	844	1.57623	1.86778	0.000432064	0.00590323	4.56375	3.80573	9.39264	3.04233	1.98637	0.835748
chr3:72387650:72388751	chr3	72387650	72388751	.	1102	0.664015	4.66371	3.20075e-05	0.00081196	25.9234	24.7753	32.8619	17.2424	17.343	18.0823
chr3:76088351:76089094	chr3	76088351	76089094	.	744	1.05662	3.593	7.71592e-06	0.000269417	23.2972	14.3909	26.1534	11.044	10.1401	9.48079
chr3:78307659:78308435	chr3	78307659	78308435	.	777	1.56082	2.48281	1.34543e-05	0.000411761	11.9801	10.1051	8.11567	3.08435	1.29459	5.90079
chr3:78386749:78387255	chr3	78386749	78387255	.	507	1.94033	1.37025	0.000607841	0.00766206	6.01449	6.33538	8.88402	3.37636	0.330669	1.73908
chr3:78968117:78968797	chr3	78968117	78968797	.	681	1.15439	2.46598	0.000849075	0.00983125	12.9619	6.5509	11.9054	7.79241	3.44654	2.84841
chr3:79416255:79416560	chr3	79416255	79416560	.	306	1.69568	2.51291	1.17762e-06	6.17093e-05	28.3221	29.1579	22.9626	10.6289	5.47874	8.64425
chr3:80136870:80137354	chr3	80136870	80137354	.	485	1.59626	2.24437	2.17055e-05	0.0005957	12.9055	12.5097	15.6022	4.23542	3.80236	5.4539
chr3:81424858:81425547	chr3	81424858	81425547	.	690	0.869009	3.46347	0.00029712	0.00445231	18.8403	20.9481	20.3668	7.19459	11.9055	13.8007
chr3:84123762:84124452	chr3	84123762	84124452	.	691	0.804186	3.71837	0.000231924	0.00368635	25.0841	22.4672	23.2054	17.0934	10.4326	13.0152
chr3:84326944:84327279	chr3	84326944	84327279	.	336	0.994405	2.90132	0.000656108	0.00810267	27.2263	19.1193	38.6074	13.7557	9.97913	18.8939
chr3:85962020:85962651	chr3	85962020	85962651	.	632	1.08035	2.71798	0.000400697	0.00557569	11.4274	14.1176	14.8239	4.60457	7.95804	6.41754
chr3:88087613:88088255	chr3	88087613	88088255	.	643	1.02869	2.74741	0.000626491	0.00783029	13.9775	11.6559	14.2902	6.12314	4.95387	8.50175
chr3:88817084:88817302	chr3	88817084	88817302	.	219	2.52847	1.2179	5.21469e-05	0.00118272	13.1911	17.9261	15.631	2.34495	2.29657	3.22087
chr3:89352804:89353424	chr3	89352804	89353424	.	621	1.31807	2.39348	0.000146123	0.00260083	10.8545	9.48267	13.6359	4.13482	4.31947	5.11138
chr3:94124007:94125062	chr3	94124007	94125062	.	1056	0.822367	3.54383	0.000331416	0.00483364	12.3105	13.8566	15.014	7.45677	8.57298	7.18062
chr3:97590720:97591609	chr3	97590720	97591609	.	890	1.01939	3.84728	2.10585e-06	9.78414e-05	20.0164	24.4612	19.029	11.925	8.28828	11.0957
chr3:98498452:98499443	chr3	98498452	98499443	.	992	0.980863	3.98614	2.20681e-06	0.000101665	16.3404	19.4277	26.6983	10.5263	9.29508	11.7325
chr3:98612373:98613222	chr3	98612373	98613222	.	850	1.21902	3.21415	4.76704e-06	0.000184255	12.6505	15.9552	15.6852	6.64587	7.69215	4.56416
chr3:98689800:98690547	chr3	98689800	98690547	.	748	0.720102	6.0398	2.75491e-10	7.67613e-08	114.361	93.2789	118.988	59.9593	68.1356	70.2542
chr3:98827305:98827888	chr3	98827305	98827888	.	584	1.32807	2.53018	8.33028e-05	0.00170087	17.0385	9.7779	12.9573	6.1555	6.60263	3.01957
chr3:98847864:98848524	chr3	98847864	98848524	.	661	0.692519	5.05039	1.24523e-06	6.41856e-05	66.2848	52.6431	64.8714	35.7384	37.2836	40.8176
chr3:99619600:99621453	chr3	99619600	99621453	.	1854	1.01402	3.55238	2.10171e-05	0.000583034	6.66552	9.7212	8.35731	5.26286	4.06916	2.85344
chr3:99656325:99656682	chr3	99656325	99656682	.	358	1.15106	2.93211	4.98998e-05	0.0011409	28.243	27.9134	28.1827	12.4322	12.6439	12.807
chr3:99664068:99665178	chr3	99664068	99665178	.	1111	1.16675	2.70388	0.000278375	0.00423452	11.1232	7.38843	4.37852	2.9275	2.26349	5.07918
chr3:101659247:101659858	chr3	101659247	101659858	.	612	1.05702	3.17447	0.000164434	0.00284287	14.161	17.2032	26.4953	8.95067	14.5187	4.03398
chr3:105716570:105717292	chr3	105716570	105717292	.	723	1.07692	2.8285	0.000245769	0.00385416	9.98912	13.8216	14.4533	5.20884	6.72453	6.0976
chr3:106279134:106279985	chr3	106279134	106279985	.	852	0.72411	4.75262	3.41687e-06	0.000142551	42.195	37.7	36.7949	21.0963	25.9738	23.5952
chr3:107168860:107169807	chr3	107168860	107169807	.	948	0.791703	4.50437	3.14821e-06	0.000134331	27.7644	33.694	28.3175	15.7097	18.0382	18.0435
chr3:107603953:107604360	chr3	107603953	107604360	.	408	3.16138	1.10125	1.20057e-05	0.000376561	11.8009	7.43527	4.41588	1.67825	0.821811	0
chr3:107711637:107712475	chr3	107711637	107712475	.	839	1.13394	3.43967	4.71185e-06	0.000183142	13.3903	19.5674	18.8972	9.3854	7.39336	6.72583
chr3:107727562:107728318	chr3	107727562	107728318	.	757	1.50384	3.69672	6.00445e-10	1.43158e-07	28.4094	20.7441	24.7523	11.5327	8.19422	6.28964
chr3:108053282:108054202	chr3	108053282	108054202	.	921	0.674051	4.66158	2.55936e-05	0.000681384	31.8893	29.838	38.3419	18.5865	21.2975	22.7848
chr3:108139635:108140226	chr3	108139635	108140226	.	592	1.15745	3.83877	1.32765e-07	1.10397e-05	34.4298	31.6502	31.6511	10.6988	16.7083	16.3832
chr3:108596594:108597227	chr3	108596594	108597227	.	634	1.48889	2.36702	2.80768e-05	0.00073177	12.6571	10.977	9.94618	4.32004	3.43761	4.17215
chr3:108851524:108852518	chr3	108851524	108852518	.	995	1.39723	2.65047	1.32398e-05	0.000407172	9.194	7.35308	9.41581	2.75267	4.0438	3.01289
chr3:109544915:109545551	chr3	109544915	109545551	.	637	1.55083	2.06804	0.000137224	0.0024833	8.81823	6.44313	11.8792	2.68731	1.8423	4.70616
chr3:109746142:109746770	chr3	109746142	109746770	.	629	0.956587	2.87275	0.000797732	0.00937125	13.0128	13.9012	17.1861	7.89231	7.996	6.7285
chr3:111253378:111254040	chr3	111253378	111254040	.	663	0.698251	4.17912	0.000173796	0.00296602	35.1	29.6065	34.7836	17.0407	23.7693	20.4802
chr3:111300790:111301478	chr3	111300790	111301478	.	689	1.0764	2.63737	0.000541011	0.00701464	12.1126	12.9497	9.6752	5.71433	5.59642	5.1188
chr3:111448407:111448688	chr3	111448407	111448688	.	282	1.20104	2.6347	0.000146765	0.00260985	35.8546	23.4132	27.4724	13.3546	13.079	11.2559
chr3:111654934:111656359	chr3	111654934	111656359	.	1426	1.46008	3.23126	9.34545e-08	8.3555e-06	9.22884	10.1362	8.59146	3.00108	2.58646	4.57551
chr3:111681970:111682960	chr3	111681970	111682960	.	991	0.952362	3.85457	6.80279e-06	0.000245056	16.5188	19.9875	19.9985	10.8824	8.12025	10.1428
chr3:111793545:111794456	chr3	111793545	111794456	.	912	1.13582	4.05703	2.43433e-08	2.87235e-06	27.6285	22.6972	23.3112	10.3235	10.6619	12.5683
chr3:112788788:112790069	chr3	112788788	112790069	.	1282	0.951014	3.98388	5.05416e-06	0.000194055	19.6546	15.7289	12.2267	7.07693	6.9309	10.7291
chr3:112816805:112817378	chr3	112816805	112817378	.	574	0.883119	3.45946	0.000193617	0.00322293	21.809	27.3577	23.2272	13.4202	13.7274	11.9815
chr3:114223730:114224518	chr3	114223730	114224518	.	789	0.751817	3.89343	0.000254115	0.00395568	26.4435	22.1645	20.5515	10.631	15.2988	15.1981
chr3:114945572:114946715	chr3	114945572	114946715	.	1144	0.623372	4.21269	0.000609133	0.00767277	19.7809	18.4062	19.6862	12.7189	10.5514	14.3356
chr3:114964366:114964770	chr3	114964366	114964770	.	405	1.58133	2.42661	1.02056e-05	0.000332735	15.0585	18.9462	22.243	9.72142	4.55344	4.35414
chr3:115300287:115301127	chr3	115300287	115301127	.	841	0.801969	4.84122	3.14185e-07	2.20011e-05	52.8612	34.3738	40.9181	23.8148	24.9182	24.9522
chr3:115463261:115463931	chr3	115463261	115463931	.	671	0.869104	4.39287	1.72827e-06	8.39687e-05	35.3991	38.2955	45.9146	16.8375	20.4877	28.1202
chr3:118947191:118947750	chr3	118947191	118947750	.	560	0.83606	3.44176	0.00061843	0.00775749	24.9335	30.9095	16.4082	17.4238	11.3762	11.6512
chr3:119314718:119315388	chr3	119314718	119315388	.	671	1.09096	3.71262	2.25431e-06	0.000103305	28.4628	26.0622	23.0916	10.7148	8.24505	17.608
chr3:119362161:119362807	chr3	119362161	119362807	.	647	0.966593	2.92989	0.000582208	0.00742591	12.4028	15.4451	16.9865	7.93732	6.47795	8.44919
chr3:120216128:120216505	chr3	120216128	120216505	.	378	1.46025	2.85288	1.27457e-06	6.531e-05	28.447	25.9645	25.7383	9.51009	10.6444	8.86379
chr3:120217728:120218188	chr3	120217728	120218188	.	461	1.26025	2.53226	0.000139017	0.0025091	11.8367	18.193	20.3226	6.68388	6.90963	7.26792
chr3:120397139:120397851	chr3	120397139	120397851	.	713	0.893206	3.27195	0.0006375	0.00793075	14.406	15.5171	21.226	14.4052	6.58371	6.43045
chr3:124147606:124148552	chr3	124147606	124148552	.	947	1.3399	2.35427	0.000185654	0.0031215	6.60948	9.23324	5.89779	1.80762	2.47845	4.28288
chr3:124537552:124537997	chr3	124537552	124537997	.	446	2.099	1.12677	0.000737323	0.00886967	4.67801	9.60251	6.05946	1.53526	1.50358	1.58155
chr3:124905231:124905553	chr3	124905231	124905553	.	323	1.60831	1.89199	0.000357526	0.00512186	10.4345	17.6789	19.5228	10.5995	1.55711	3.27572
chr3:126673276:126673783	chr3	126673276	126673783	.	508	2.28691	1.61923	9.38717e-06	0.000311469	8.21415	9.48437	9.2212	1.68486	1.65009	2.08279
chr3:127466360:127467427	chr3	127466360	127467427	.	1068	0.811433	4.05247	3.15408e-05	0.000803932	19.3852	17.0427	21.7619	10.7389	10.5173	11.8883
chr3:127773185:127773657	chr3	127773185	127773657	.	473	0.911366	3.04707	0.000831192	0.00967099	15.9474	23.7677	26.2824	10.8572	9.92428	14.1671
chr3:129383693:129384408	chr3	129383693	129384408	.	716	0.951071	4.3633	1.36752e-07	1.12816e-05	36.9848	40.1256	34.7251	18.4092	18.7318	20.6883
chr3:131121588:131122062	chr3	131121588	131122062	.	475	1.22334	3.06798	1.08746e-05	0.000349291	29.3953	20.6622	20.8616	9.36994	8.82365	12.2512
chr3:131265115:131265791	chr3	131265115	131265791	.	677	2.29348	2.9681	5.13581e-12	3.23929e-09	24.8916	13.7064	16.2337	3.28709	3.96217	3.90715
chr3:131447589:131448583	chr3	131447589	131448583	.	995	0.997407	3.29165	8.84959e-05	0.00177196	15.0007	12.016	10.8644	7.74188	4.88626	6.38024
chr3:131456703:131457299	chr3	131456703	131457299	.	597	1.21104	2.50177	0.000284098	0.0043027	10.4844	10.1628	16.9002	5.16125	4.77394	6.20301
chr3:131973684:131974602	chr3	131973684	131974602	.	919	2.11421	3.67139	1.13816e-14	1.83641e-11	20.4326	21.165	24.3099	2.60777	4.9255	7.67542
chr3:133287285:133287889	chr3	133287285	133287889	.	605	1.04061	2.87477	0.000330611	0.00482394	16.4471	17.1073	13.1031	7.07362	9.97583	5.53804
chr3:133314155:133314821	chr3	133314155	133314821	.	667	1.23023	2.30928	0.000736387	0.00886066	11.309	9.09623	8.64374	7.18603	2.26214	2.9082
chr3:141013647:141014303	chr3	141013647	141014303	.	657	1.14446	2.7617	0.000214032	0.00348008	11.7254	15.7533	13.163	9.64036	3.57244	5.09971
chr3:141362237:141362728	chr3	141362237	141362728	.	492	1.38069	2.4058	8.16857e-05	0.00167624	16.3101	13.0571	14.2816	6.61067	6.81502	3.22578
chr3:142614981:142615566	chr3	142614981	142615566	.	586	2.13692	1.51689	7.01149e-05	0.00148145	9.58569	7.30839	3.9969	1.16847	1.71655	1.80556
chr3:142876683:142877874	chr3	142876683	142877874	.	1192	1.47553	3.74832	4.77757e-10	1.18916e-07	17.7726	13.623	17.0797	7.46765	5.20388	4.73403
chr3:143140488:143140982	chr3	143140488	143140982	.	495	2.46647	1.04776	0.000232338	0.00369124	4.86339	9.01245	4.00373	0.345821	1.35474	1.42499
chr3:145835106:145836045	chr3	145835106	145836045	.	940	0.959946	3.48092	7.59561e-05	0.00157779	15.8784	16.8955	12.8418	6.19167	6.24226	11.0683
chr3:145884375:145884712	chr3	145884375	145884712	.	338	1.45687	2.00333	0.000349269	0.00502849	19.4679	14.7826	13.326	4.05164	6.94406	6.26069
chr3:147818870:147819353	chr3	147818870	147819353	.	484	1.1027	3.18647	3.34786e-05	0.000840661	30.1751	19.9093	23.8239	9.54939	10.7379	14.2094
chr3:147896179:147896767	chr3	147896179	147896767	.	589	1.03378	3.04976	0.000146891	0.00261047	19.8912	16.6631	17.7415	10.4627	8.82365	7.18544
chr3:148620778:148621209	chr3	148620778	148621209	.	432	1.06816	3.46798	1.41144e-05	0.000426721	30.0922	30.1542	40.8714	10.6988	19.4039	17.9608
chr3:149191132:149192168	chr3	149191132	149192168	.	1037	1.39743	3.68134	4.20769e-09	6.86893e-07	14.8575	21.51	16.1578	7.26325	6.14337	6.46193
chr3:149212207:149213210	chr3	149212207	149213210	.	1004	1.24254	2.72639	5.31083e-05	0.00119904	9.91085	9.41999	6.99856	3.58049	3.84057	3.68844
chr3:149269332:149269574	chr3	149269332	149269574	.	243	1.55179	2.49295	7.74324e-06	0.000270099	27.7393	38.1861	31.8816	12.6801	13.7983	6.53121
chr3:149396134:149396544	chr3	149396134	149396544	.	411	0.933262	3.2142	0.00046553	0.00624849	21.477	28.2215	36.3843	12.0785	10.1977	22.7401
chr3:149815075:149815804	chr3	149815075	149815804	.	730	1.68667	2.93042	4.46153e-08	4.68292e-06	17.1484	17.3558	11.1062	4.22092	3.67451	6.2807
chr3:149895495:149896092	chr3	149895495	149896092	.	598	1.9962	1.40157	0.00033999	0.00492659	4.83086	6.56492	7.23082	1.14503	2.8035	0.589775
chr3:149950709:149951439	chr3	149950709	149951439	.	731	1.05891	4.59184	1.83023e-09	3.47894e-07	48.0817	39.7904	43.8713	16.3922	19.9528	27.0183
chr3:150762457:150762842	chr3	150762457	150762842	.	386	0.819901	4.07895	2.5671e-05	0.000682657	51.1412	52.7018	60.6783	25.7216	30.4027	37.0046
chr3:150936703:150937403	chr3	150936703	150937403	.	701	1.1056	3.32077	1.7604e-05	0.000504489	21.2921	19.3466	15.678	11.9656	8.13135	6.03741
chr3:151739619:151740233	chr3	151739619	151740233	.	615	1.24821	2.729	4.98364e-05	0.00114039	13.831	17.4094	12.0112	6.68026	5.72461	5.73472
chr3:152046655:152047033	chr3	152046655	152047033	.	379	1.10073	2.69491	0.000409146	0.00566505	17.3619	21.1876	28.0473	7.67833	8.84693	14.4238
chr3:152848161:152848914	chr3	152848161	152848914	.	754	0.784813	4.02839	5.70714e-05	0.00126605	27.8839	26.98	25.5676	17.0273	14.4525	15.202
chr3:153618797:153620003	chr3	153618797	153620003	.	1207	0.780091	4.40905	8.76632e-06	0.000295677	22.8704	19.9588	22.8382	15.317	11.9452	10.9575
chr3:153961031:153961741	chr3	153961031	153961741	.	711	1.47329	2.15865	0.000145078	0.00258953	10.6092	6.02351	8.86903	2.64838	4.24429	2.23219
chr3:155134496:155135147	chr3	155134496	155135147	.	652	0.992261	2.82946	0.000855877	0.00990174	19.6922	9.57919	11.8822	6.56371	8.74245	5.40929
chr3:155429540:155430307	chr3	155429540	155430307	.	768	1.52273	2.81479	1.81131e-06	8.73305e-05	13.1653	14.1735	11.4951	3.78918	2.18293	7.57723
chr3:156207073:156207731	chr3	156207073	156207731	.	659	2.89159	1.35602	3.61883e-06	0.000149627	3.65308	6.7696	7.65509	1.03904	1.0176	0.267591
chr3:156554835:156555348	chr3	156554835	156555348	.	514	2.49928	0.943305	0.000445375	0.00603753	5.30809	5.90193	4.55678	0.333038	0	2.40155
chr3:157077872:157078162	chr3	157077872	157078162	.	291	0.891016	3.60613	9.17847e-05	0.001821	48.5336	50.8971	59.4369	22.9419	34.5669	27.8755
chr3:157177873:157178542	chr3	157177873	157178542	.	670	1.08954	3.23166	3.45918e-05	0.00085755	21.3191	14.6486	19.0924	5.87638	10.2591	9.73833
chr3:157878734:157879222	chr3	157878734	157879222	.	489	0.917526	3.13494	0.000484367	0.00643782	22.3179	19.7058	25.7909	10.1519	11.9994	13.7035
chr3:158443073:158443703	chr3	158443073	158443703	.	631	1.93733	1.78028	5.94141e-05	0.00130159	10.6825	6.50439	5.99608	0.542572	1.59413	3.91252
chr3:158464515:158465295	chr3	158464515	158465295	.	781	1.01146	2.89663	0.000517933	0.00677365	15.0012	7.76848	13.6106	6.35629	4.2932	7.4511
chr3:158909257:158909798	chr3	158909257	158909798	.	542	0.918192	3.24315	0.000764862	0.00911319	13.9172	24.6928	27.9227	6.31666	9.27949	19.5213
chr3:160099257:160099592	chr3	160099257	160099592	.	336	2.65984	1.0483	8.66778e-05	0.00174462	7.16481	7.43527	12.3329	1.01894	1.49687	1.57449
chr3:161057573:161058188	chr3	161057573	161058188	.	616	3.95357	0.940489	1.99217e-06	9.3897e-05	6.25293	3.76592	4.38721	0	0.544316	0.286271
chr3:161133134:161134165	chr3	161133134	161134165	.	1032	0.669744	4.8679	1.03314e-05	0.000336343	33.5913	33.891	35.6146	18.412	27.1293	19.138
chr3:161193814:161194197	chr3	161193814	161194197	.	384	1.79946	1.73289	0.000143398	0.0025688	14.6282	6.97057	14.5448	2.67471	3.4927	4.13303
chr3:161270035:161270866	chr3	161270035	161270866	.	832	0.987766	2.95579	0.000498354	0.00659214	9.83784	12.4398	13.426	8.22988	5.84355	3.81511
chr3:161986780:161987530	chr3	161986780	161987530	.	751	1.07685	2.61628	0.00059976	0.0075781	11.54	10.2173	9.59616	4.33083	6.02734	4.4614
chr3:162108553:162109816	chr3	162108553	162109816	.	1264	1.22399	4.77403	3.59441e-13	3.5124e-10	29.7113	30.0705	30.0755	12.4594	12.8655	13.1141
chr3:168058978:168060084	chr3	168058978	168060084	.	1107	0.948752	3.6712	2.43046e-05	0.000654347	16.6726	13.0571	14.485	8.65959	8.32946	5.89402
chr3:168602653:168603180	chr3	168602653	168603180	.	528	1.46607	2.15297	0.000168452	0.00289717	10.9426	15.8845	7.507	2.91787	5.08028	4.34177
chr3:169816270:169817070	chr3	169816270	169817070	.	801	0.756069	4.63489	3.93873e-06	0.0001599	38.2696	33.8625	43.1863	21.5847	20.0928	26.6385
chr3:170719621:170720517	chr3	170719621	170720517	.	897	1.18748	3.82318	1.14103e-07	9.80972e-06	21.4705	22.4799	20.2865	12.2136	6.1677	9.82958
chr3:170833536:170834850	chr3	170833536	170834850	.	1315	0.934465	3.92243	5.34413e-06	0.000202909	15.622	14.9271	13.838	8.07092	8.15936	6.97325
chr3:170850638:170851153	chr3	170850638	170851153	.	516	2.12534	1.71226	2.01957e-05	0.000564764	6.53164	14.5247	6.98325	2.98573	2.27431	1.02525
chr3:171471643:171471995	chr3	171471643	171471995	.	353	2.55678	2.17246	6.97214e-09	1.02921e-06	18.186	19.7151	22.9676	3.39454	5.69913	0.999109
chr3:171506029:171506732	chr3	171506029	171506732	.	704	0.897257	3.8243	2.41393e-05	0.000651151	25.5328	27.6288	23.5447	12.8872	16.6697	11.5224
chr3:171514976:171515434	chr3	171514976	171515434	.	459	0.98591	3.6419	1.69069e-05	0.000490244	31.469	38.0997	36.1121	18.2743	12.7837	22.283
chr3:171519462:171520024	chr3	171519462	171520024	.	563	2.35103	1.82091	1.77346e-06	8.5744e-05	8.83703	9.5087	10.2405	2.43242	0.297779	2.81898
chr3:171593728:171595041	chr3	171593728	171595041	.	1314	0.6516	4.37763	0.00016486	0.00284881	21.4966	18.1977	17.2764	12.6367	11.8656	11.8099
chr3:171694226:171694732	chr3	171694226	171694732	.	507	2.4164	2.30218	5.26261e-09	8.29819e-07	16.7773	15.4865	13.5037	4.05164	0.992008	3.47816
chr3:171799919:171800465	chr3	171799919	171800465	.	547	2.29012	1.97383	3.95649e-07	2.64654e-05	12.0296	10.1131	10.54	3.12946	1.22596	2.25667
chr3:172073562:172074181	chr3	172073562	172074181	.	620	0.988665	3.36994	6.50985e-05	0.00139831	24.3326	20.7228	19.1792	13.5289	9.73448	9.10156
chr3:172309986:172310497	chr3	172309986	172310497	.	512	1.56855	2.26052	2.72167e-05	0.000714452	13.1653	15.3353	10.5567	5.01509	3.2744	4.82187
chr3:173381398:173381817	chr3	173381398	173381817	.	420	1.66882	2.46446	2.60232e-06	0.000115408	24.838	16.9949	14.1561	4.48333	6.38664	6.71782
chr3:173695416:173696245	chr3	173695416	173696245	.	830	0.761751	4.65312	3.00913e-06	0.000129512	32.6785	35.9043	44.4993	22.068	24.2385	20.1838
chr3:176308527:176308914	chr3	176308527	176308914	.	388	1.40041	2.2392	0.000186558	0.00313171	10.341	22.9957	16.2523	5.29428	6.0492	7.27187
chr3:176484865:176485821	chr3	176484865	176485821	.	957	0.635331	5.9327	2.08044e-08	2.54569e-06	76.1372	69.7377	85.8481	52.7676	45.7226	50.6732
chr3:176513730:176514436	chr3	176513730	176514436	.	707	1.07365	2.65617	0.000565923	0.00726434	12.9392	8.58159	12.7417	6.53734	5.21681	4.48963
chr3:177527927:177528430	chr3	177527927	177528430	.	504	1.60191	2.7213	6.5588e-07	3.92284e-05	19.743	19.1193	17.1589	4.07575	7.65067	6.64784
chr3:178236479:178237147	chr3	178236479	178237147	.	669	1.7709	1.7158	0.000224526	0.00360093	10.7954	4.00104	5.38619	2.04701	2.50597	1.31796
chr3:178495209:178496171	chr3	178495209	178496171	.	963	1.00189	5.00681	4.7459e-11	1.87086e-08	44.6644	40.0254	47.5209	21.331	20.8909	23.8054
chr3:178544822:178545493	chr3	178544822	178545493	.	672	0.786237	3.57344	0.000575762	0.00736746	19.5838	22.5714	23.3253	13.2462	9.48017	15.2201
chr3:179483058:179483731	chr3	179483058	179483731	.	674	1.05655	2.58292	0.000837824	0.00973048	12.144	11.1198	10.6925	4.57161	6.21845	5.49436
chr3:181285322:181285826	chr3	181285322	181285826	.	505	1.83117	1.44564	0.0005997	0.0075781	8.26294	8.48063	5.35152	1.69487	1.65989	2.79355
chr3:183172532:183173412	chr3	183172532	183173412	.	881	1.44353	2.45182	3.32008e-05	0.000834894	9.83718	8.70965	6.95313	4.46899	2.47383	2.40194
chr3:184184355:184184689	chr3	184184355	184184689	.	335	1.80893	1.43089	0.000736221	0.0088602	11.977	11.1862	9.68067	2.55495	2.00178	4.73757
chr3:185411809:185412632	chr3	185411809	185412632	.	824	0.698906	4.39505	6.77526e-05	0.00144148	34.6693	34.4333	24.0516	19.528	20.3458	17.5487
chr3:187704229:187704977	chr3	187704229	187704977	.	749	0.856632	3.53575	0.000196904	0.00326354	18.4276	19.0597	20.6868	10.0561	11.863	10.1238
chr3:187960646:187961365	chr3	187960646	187961365	.	720	1.25071	2.59954	0.00013045	0.00238692	14.7117	8.1788	10.5098	3.32853	6.5197	4.16365
chr3:187961885:187962828	chr3	187961885	187962828	.	944	0.766835	4.4998	7.9053e-06	0.00027506	25.1619	28.5439	35.6901	15.4136	17.5819	19.4276
chr3:188203822:188204227	chr3	188203822	188204227	.	406	1.08947	3.17586	3.50267e-05	0.000864515	30.0428	28.1295	29.2884	11.384	14.0396	15.6363
chr3:188296277:188297073	chr3	188296277	188297073	.	797	1.2496	2.85634	5.83538e-05	0.00128567	11.6795	14.7773	10.1726	6.22869	1.6828	7.52278
chr3:188345381:188346011	chr3	188345381	188346011	.	631	1.60265	2.79815	6.02776e-07	3.66847e-05	19.3302	13.0088	14.8474	2.44158	6.37652	6.70717
chr3:188400679:188401294	chr3	188400679	188401294	.	616	0.889252	3.89661	1.69091e-05	0.000490244	31.7857	30.417	29.833	16.1177	14.1522	19.4664
chr3:188405181:188405556	chr3	188405181	188405556	.	376	1.05434	3.22414	5.75779e-05	0.00127318	28.5983	39.3911	29.2294	15.4792	11.5928	19.6979
chr3:189206093:189206675	chr3	189206093	189206675	.	583	2.66444	2.2621	5.20586e-10	1.27214e-07	11.8373	15.6103	12.3614	1.17449	2.87563	2.11732
chr3:189281560:189282165	chr3	189281560	189282165	.	606	0.624669	4.40249	0.000296779	0.00444912	42.3741	34.4526	48.1637	29.3777	24.8984	26.7715
chr3:189923388:189923939	chr3	189923388	189923939	.	552	1.22483	2.51218	0.000234141	0.00370968	14.828	13.2542	12.7293	8.37301	4.25198	4.79192
chr3:190103778:190104957	chr3	190103778	190104957	.	1180	0.620643	4.97364	1.82749e-05	0.000520491	34.0025	29.3378	32.3692	17.2632	22.1638	22.8648
chr3:191739624:191740658	chr3	191739624	191740658	.	1035	0.813	3.82169	0.000130878	0.00239397	14.8862	17.9309	18.2779	7.11189	11.8245	10.0524
chr3:193450166:193450891	chr3	193450166	193450891	.	726	0.775019	3.69097	0.000390708	0.0054818	18.1272	25.3168	22.3349	13.6757	11.777	12.8735
chr3:194443407:194444108	chr3	194443407	194444108	.	702	0.922138	3.22608	0.000390306	0.00547833	15.7748	13.2183	21.5586	9.99778	10.2691	6.28001
chr3:194458985:194459504	chr3	194458985	194459504	.	520	1.50683	2.3443	3.03152e-05	0.00077947	12.9628	16.8152	10.7408	4.60873	5.80325	3.73033
chr3:194860287:194861044	chr3	194860287	194861044	.	758	2.03426	1.18127	0.000808015	0.00946801	3.81115	2.58959	5.94222	0.6775	1.10587	1.16321
chr3:195272849:195273489	chr3	195272849	195273489	.	641	0.718826	4.15503	0.00011459	0.00216334	33.5505	33.9633	34.2909	22.1655	21.7081	17.8819
chr3:197098470:197099455	chr3	197098470	197099455	.	986	1.28246	3.34992	7.22729e-07	4.24221e-05	13.9983	15.5643	12.9736	5.55559	4.25074	7.6904
chr3:197247247:197248443	chr3	197247247	197248443	.	1197	0.981862	3.86388	4.38865e-06	0.000173079	17.162	12.8207	17.3094	6.14938	9.24383	8.54459
chr3:197562796:197563625	chr3	197562796	197563625	.	830	1.45815	2.1081	0.000207652	0.00340186	5.41418	6.87987	8.89986	3.09364	2.82782	1.69969
chr3:197634871:197636002	chr3	197634871	197636002	.	1132	1.48974	1.89279	0.00061943	0.00776582	2.26844	5.20206	5.88888	1.36098	2.2215	1.09046
chr4:3950010:3950305	chr4	3950010	3950305	.	296	1.42301	2.09325	0.000456213	0.00614484	24.3991	11.4543	21.9123	2.31326	9.06213	10.1278
chr4:5226014:5226382	chr4	5226014	5226382	.	369	1.62072	2.2252	1.98178e-05	0.00055554	18.2674	15.9586	19.0421	4.17516	6.81502	6.21262
chr4:5339452:5339880	chr4	5339452	5339880	.	429	1.3375	2.43102	0.000111416	0.00211377	16.8348	14.5586	19.3187	8.77854	7.03424	4.11055
chr4:5640041:5640559	chr4	5640041	5640559	.	519	1.05403	3.90524	9.09975e-07	5.01861e-05	34.9433	35.7581	43.7402	13.1932	17.7663	24.124
chr4:5724057:5724449	chr4	5724057	5724449	.	393	4.04032	1.00492	8.22975e-07	4.6917e-05	8.98427	7.71906	7.33508	0.871153	0.426589	0
chr4:11914363:11914982	chr4	11914363	11914982	.	620	1.07314	2.7137	0.000485688	0.0064492	14.7549	15.8299	10.1708	7.73078	7.30086	4.26636
chr4:13612790:13613376	chr4	13612790	13613376	.	587	2.30585	2.97436	1.84347e-12	1.39021e-09	22.1462	20.6718	21.1782	4.95756	4.28406	3.60496
chr4:13893401:13894215	chr4	13893401	13894215	.	815	0.628428	4.41965	0.000222369	0.00357936	31.9014	33.4998	28.7385	22.0541	18.5134	20.3389
chr4:17563031:17563533	chr4	17563031	17563533	.	503	0.95674	3.26508	0.000209463	0.00342363	24.5683	26.2526	22.2076	7.48707	13.9986	16.1268
chr4:22988976:22990030	chr4	22988976	22990030	.	1055	0.958594	4.08912	9.97109e-07	5.41803e-05	20.689	20.9738	21.0054	12.1693	10.0113	10.029
chr4:23008327:23009067	chr4	23008327	23009067	.	741	1.15783	2.64842	0.000245064	0.00384412	12.9953	11.3185	8.7531	6.4684	4.7512	3.56969
chr4:23023633:23024046	chr4	23023633	23024046	.	414	1.34329	2.79337	1.13449e-05	0.000360232	18.6077	23.7067	26.5465	7.0292	8.9089	11.0747
chr4:23085673:23086808	chr4	23085673	23086808	.	1136	1.08947	4.55611	8.55471e-10	1.89021e-07	34.1893	23.4054	25.5344	13.4112	12.3966	13.3499
chr4:23439955:23440864	chr4	23439955	23440864	.	910	0.903207	3.66969	5.84022e-05	0.00128601	18.3419	17.2564	17.6208	11.6629	10.1327	6.58863
chr4:23681942:23682873	chr4	23681942	23682873	.	932	0.992362	4.84082	7.32137e-10	1.67091e-07	35.4735	37.1445	48.9083	22.0405	19.7869	19.1101
chr4:24069245:24070114	chr4	24069245	24070114	.	870	0.937909	3.6288	4.38503e-05	0.00103257	18.0784	20.9213	15.5317	6.68985	10.2131	11.5535
chr4:24071767:24072157	chr4	24071767	24072157	.	391	1.84409	1.52048	0.000355618	0.00509905	10.6721	8.21493	11.5197	2.62683	2.14385	3.60804
chr4:24748993:24749666	chr4	24748993	24749666	.	674	1.12425	4.53748	3.00807e-10	8.30927e-08	44.7663	48.4506	46.5122	21.8422	17.1629	25.1171
chr4:24755133:24755719	chr4	24755133	24755719	.	587	2.45012	2.03649	8.81559e-08	7.95351e-06	11.7566	10.0319	10.7426	0.874863	1.14241	3.90538
chr4:25322132:25322729	chr4	25322132	25322729	.	598	1.36111	2.36121	0.000144999	0.00258878	10.1985	13.1298	11.4488	5.72514	5.607	2.06421
chr4:26570070:26570706	chr4	26570070	26570706	.	637	0.848711	4.74795	8.79454e-08	7.94486e-06	49.3821	54.9066	56.5677	31.1728	29.2136	28.7907
chr4:26694017:26694736	chr4	26694017	26694736	.	720	1.3874	2.41171	7.89516e-05	0.00163013	12.4827	8.92233	8.50793	4.51729	4.65693	2.20428
chr4:30621292:30621620	chr4	30621292	30621620	.	329	2.27473	2.18278	5.99056e-08	5.89539e-06	17.5614	22.7804	23.5478	5.7234	5.09573	2.14398
chr4:36836819:36837259	chr4	36836819	36837259	.	441	1.1001	3.30938	2.71894e-05	0.000714006	34.5731	31.1573	22.8785	8.53967	12.5452	20.3934
chr4:36840254:36840746	chr4	36840254	36840746	.	493	0.995771	3.75148	6.49905e-06	0.000236199	40.0416	28.2329	38.007	19.4446	14.9626	18.9577
chr4:38192173:38192697	chr4	38192173	38192697	.	525	1.07966	4.0721	6.75579e-08	6.50092e-06	41.8807	41.8075	44.2698	21.52	20.4373	18.474
chr4:38689065:38689824	chr4	38689065	38689824	.	760	1.07154	3.39868	1.44479e-05	0.000433749	15.838	22.071	16.8315	8.55908	9.26483	8.12105
chr4:52993167:52993488	chr4	52993167	52993488	.	322	0.964572	2.99063	0.00043536	0.00593774	30.9021	32.6967	30.2145	18.0751	15.0989	14.7865
chr4:54407310:54407938	chr4	54407310	54407938	.	629	1.77624	1.53584	0.000551349	0.00712073	5.86854	6.24138	6.87445	2.99364	0.7996	1.68212
chr4:54568604:54569420	chr4	54568604	54569420	.	817	1.0588	3.2409	6.57114e-05	0.00140885	14.3401	14.6339	16.3188	3.98097	7.18204	10.5762
chr4:54854156:54854603	chr4	54854156	54854603	.	448	1.40913	3.33088	8.88951e-08	7.9994e-06	26.5098	35.8486	32.575	12.9915	13.4718	9.05331
chr4:54944044:54944793	chr4	54944044	54944793	.	750	2.84114	0.853554	0.000142389	0.00255534	3.42383	4.52065	2.40224	0.228242	0.89413	0.235124
chr4:54948240:54948998	chr4	54948240	54948998	.	759	2.28087	1.16122	0.000312428	0.00462278	4.86339	3.2915	4.27276	0.225536	0.662646	1.62635
chr4:58014856:58015530	chr4	58014856	58015530	.	675	0.961181	3.76504	9.33706e-06	0.000310378	23.7766	26.1722	28.0261	13.4409	11.9217	14.6299
chr4:67438830:67439109	chr4	67438830	67439109	.	280	0.76292	3.71674	0.000484708	0.00644052	55.0258	56.0832	61.7719	45.2408	29.3386	27.0812
chr4:67652816:67653082	chr4	67652816	67653082	.	267	1.9024	1.56312	0.000216319	0.00350402	16.2295	18.7135	11.4714	4.48791	1.8837	5.94414
chr4:67900782:67901700	chr4	67900782	67901700	.	919	0.688998	4.71699	1.84414e-05	0.000524155	27.942	33.7864	43.1305	18.6269	22.4384	23.7938
chr4:70187629:70188142	chr4	70187629	70188142	.	514	2.56663	0.98482	0.000174487	0.00297661	5.62034	6.2491	4.55678	0.999114	0.978498	0.686159
chr4:72872228:72872873	chr4	72872228	72872873	.	646	0.791005	3.98785	0.000101613	0.0019724	22.3595	32.043	37.3723	17.4891	20.7615	14.4677
chr4:73723928:73724432	chr4	73723928	73724432	.	505	1.64008	2.37117	6.93271e-06	0.00024819	11.441	16.9613	15.341	5.76255	5.31166	2.79355
chr4:75073171:75073760	chr4	75073171	75073760	.	590	2.98578	1.90121	6.65718e-09	9.89027e-07	8.97666	13.6103	8.24498	1.45069	0.284151	2.0922
chr4:75411554:75412178	chr4	75411554	75412178	.	625	0.890001	3.86209	2.49127e-05	0.000666324	34.1527	22.8412	31.4213	17.8029	16.0943	13.8253
chr4:77115295:77115987	chr4	77115295	77115987	.	693	2.60286	0.855649	0.000395024	0.00552556	2.77908	4.37748	3.89974	1.23508	0	0.508926
chr4:77579213:77580562	chr4	77579213	77580562	.	1350	0.679683	4.75289	1.40429e-05	0.00042527	24.371	21.4136	27.0919	17.1182	15.6473	12.6706
chr4:79486961:79487764	chr4	79486961	79487764	.	804	0.935972	3.43973	0.000103103	0.00199534	13.5739	18.4217	19.7199	8.72941	8.54928	9.6506
chr4:79506757:79507236	chr4	79506757	79507236	.	480	2.0697	1.92202	3.94217e-06	0.000159936	11.0338	8.55057	15.3893	2.4964	3.14343	2.57166
chr4:80172015:80172280	chr4	80172015	80172280	.	266	2.10361	1.1274	0.000748356	0.00896734	7.24023	10.0628	16.9331	3.2177	2.52104	1.98883
chr4:80388543:80389080	chr4	80388543	80389080	.	538	1.10589	2.56998	0.000558884	0.00719128	14.0207	15.2575	13.3954	8.27272	6.54393	4.91662
chr4:86655048:86656153	chr4	86655048	86656153	.	1106	0.646433	4.59436	8.30625e-05	0.00169696	25.5394	23.5562	29.8108	15.3228	20.4635	14.5092
chr4:87013848:87014330	chr4	87013848	87014330	.	483	1.47016	2.28702	5.63153e-05	0.0012535	12.6267	14.0393	14.9207	4.96178	5.9007	4.01609
chr4:88477076:88477558	chr4	88477076	88477558	.	483	0.684837	4.86677	9.76371e-06	0.00032059	58.8138	83.1273	79.453	39.6943	56.9244	40.526
chr4:89533206:89534141	chr4	89533206	89534141	.	936	0.695292	4.1767	0.000214025	0.00348008	24.691	20.3993	25.2158	11.339	17.9113	14.13
chr4:89537198:89538136	chr4	89537198	89538136	.	939	1.05193	3.34149	4.14697e-05	0.000988378	14.1862	15.5832	12.4717	8.20359	3.74935	8.45093
chr4:89544056:89544922	chr4	89544056	89544922	.	867	0.853554	4.91178	3.18039e-08	3.54752e-06	36.8372	44.4573	51.5359	23.2981	22.624	27.4582
chr4:96427203:96427773	chr4	96427203	96427773	.	571	0.952602	4.01145	2.13698e-06	9.89746e-05	32.0421	37.5019	40.0724	17.6878	20.5525	18.2211
chr4:99351751:99352465	chr4	99351751	99352465	.	715	1.88117	2.6178	4.26918e-08	4.52748e-06	13.4678	13.7267	11.0873	3.83064	2.57922	3.94613
chr4:102092847:102093825	chr4	102092847	102093825	.	979	1.4373	2.72494	6.5055e-06	0.00023631	11.1475	7.47325	9.38567	2.44795	4.96612	2.88201
chr4:102186467:102187396	chr4	102186467	102187396	.	930	1.62945	2.6103	1.14695e-06	6.03759e-05	10.3543	7.48324	10.2676	3.86539	2.34349	2.84424
chr4:102276932:102278550	chr4	102276932	102278550	.	1619	1.89342	1.68388	0.000120523	0.00224541	2.97391	3.30661	2.11439	1.05733	0.207102	0.980287
chr4:103311134:103312211	chr4	103311134	103312211	.	1078	0.625855	4.23605	0.000728748	0.00879161	23.8207	19.0365	19.5544	14.2916	16.796	9.32424
chr4:103475243:103475958	chr4	103475243	103475958	.	716	1.75059	2.19878	1.26046e-05	0.000390755	8.51772	8.22449	10.8201	1.43448	5.15124	1.47773
chr4:103541109:103542544	chr4	103541109	103542544	.	1436	0.736405	4.41308	3.23577e-05	0.000818736	17.2115	18.64	18.9452	14.5433	9.80679	8.47329
chr4:103548989:103549453	chr4	103548989	103549453	.	465	1.55681	1.94482	0.000215222	0.00348962	9.31888	11.5127	13.1736	5.15385	3.24483	3.03385
chr4:105981665:105982834	chr4	105981665	105982834	.	1170	0.771955	4.79065	7.57634e-07	4.39137e-05	28.5319	27.1483	32.7998	15.0698	19.3442	17.3328
chr4:106481262:106482218	chr4	106481262	106482218	.	957	0.713025	4.27592	7.25499e-05	0.001523	26.6648	24.9863	22.4033	13.4155	15.9416	15.8469
chr4:106541983:106542843	chr4	106541983	106542843	.	861	0.695649	3.8894	0.000700025	0.00852813	22.5546	20.9328	18.8329	9.34441	14.0195	15.1561
chr4:108784815:108785664	chr4	108784815	108785664	.	850	1.891	1.40463	0.00081156	0.00949832	2.07695	7.55774	3.3914	2.21529	0.394469	0.829848
chr4:109132029:109133185	chr4	109132029	109133185	.	1157	0.818105	3.61066	0.000267559	0.00411876	11.9294	12.8013	14.6377	7.2497	6.6654	8.38276
chr4:110327728:110328708	chr4	110327728	110328708	.	981	0.631202	4.30799	0.000452064	0.00610401	23.5584	18.9179	29.9362	17.6242	15.0389	14.0211
chr4:111196896:111197453	chr4	111196896	111197453	.	558	0.995537	2.75954	0.000782247	0.00925304	14.9562	17.269	13.8839	7.05587	8.41251	7.58463
chr4:113816236:113817465	chr4	113816236	113817465	.	1230	0.878473	4.2573	2.38894e-06	0.000107907	21.3989	18.8602	19.0421	8.62867	10.7677	12.9031
chr4:114394989:114395716	chr4	114394989	114395716	.	728	1.08248	3.22502	3.39463e-05	0.000848412	13.4478	16.1779	21.0361	8.22988	8.06007	7.5091
chr4:114566618:114567727	chr4	114566618	114567727	.	1110	0.662754	4.08928	0.000496348	0.00656937	19.2301	18.0054	18.0168	12.9543	12.687	9.21431
chr4:114748357:114748814	chr4	114748357	114748814	.	458	1.94547	2.26765	8.57871e-07	4.82327e-05	16.8201	19.8707	9.8345	5.98014	2.92837	3.08022
chr4:123614139:123614702	chr4	123614139	123614702	.	564	1.1918	2.75421	0.000186517	0.00313171	10.5287	11.3902	25.8752	5.76676	5.05326	10.0053
chr4:123794876:123795673	chr4	123794876	123795673	.	798	1.54095	2.27211	8.10876e-05	0.00166692	11.0615	7.60299	6.32168	0.858053	5.67235	1.98883
chr4:125330702:125331850	chr4	125330702	125331850	.	1149	0.970491	4.02462	1.36871e-06	6.94158e-05	20.2535	19.1026	15.6804	9.83288	8.46272	9.8224
chr4:126310766:126311359	chr4	126310766	126311359	.	594	0.916932	3.13744	0.000629357	0.00785903	17.0219	16.2224	22.7485	8.93372	6.77371	13.953
chr4:126649819:126650401	chr4	126649819	126650401	.	583	1.66565	1.63483	0.000750075	0.0089864	4.95515	11.019	5.87168	3.52346	0.86269	2.4198
chr4:127618812:127619197	chr4	127618812	127619197	.	386	2.18154	1.38191	0.000142526	0.00255715	12.4735	7.85905	8.40162	3.99128	0.86865	1.37054
chr4:127622751:127623279	chr4	127622751	127623279	.	529	1.24417	2.40408	0.00038907	0.00546653	17.5965	13.8305	7.83339	5.17751	4.11993	7.33372
chr4:127759940:127760860	chr4	127759940	127760860	.	921	1.55037	2.14073	7.02058e-05	0.00148231	7.84162	6.5876	5.2818	2.41624	2.54842	1.72322
chr4:128225632:128225898	chr4	128225632	128225898	.	267	1.21221	2.74707	6.43727e-05	0.00138744	33.6612	36.0903	30.3654	13.4637	14.4417	15.1906
chr4:128230635:128231282	chr4	128230635	128231282	.	648	1.03259	3.5243	1.25103e-05	0.000388872	27.244	22.3058	19.7406	11.3593	11.3836	11.1575
chr4:128620044:128620452	chr4	128620044	128620452	.	409	1.54334	2.37045	2.16745e-05	0.000595083	15.3036	20.9424	16.7393	2.92976	7.78811	7.32965
chr4:129697877:129698327	chr4	129697877	129698327	.	451	1.61901	2.78627	4.93603e-07	3.15052e-05	19.928	27.3011	18.7758	7.97076	3.71728	9.7751
chr4:131178473:131178934	chr4	131178473	131178934	.	462	1.23671	3.07392	8.46042e-06	0.00028802	21.5379	31.2861	21.0586	10.7452	9.43481	11.0691
chr4:134948985:134949716	chr4	134948985	134949716	.	732	1.0311	3.57259	1.517e-05	0.00045094	17.9786	19.0148	26.8283	10.2896	13.5127	7.22716
chr4:138676001:138676640	chr4	138676001	138676640	.	640	1.48763	2.08916	0.000207891	0.00340497	6.26921	10.0376	10.979	2.67471	4.97709	1.92875
chr4:138813154:138813786	chr4	138813154	138813786	.	633	1.16648	2.44732	0.000495855	0.00656409	10.3952	12.4039	10.8158	4.59729	5.56183	4.7359
chr4:139656963:139657938	chr4	139656963	139657938	.	976	1.69553	1.75987	0.000239711	0.00377723	4.2754	5.66787	4.43036	1.05235	2.23303	1.08407
chr4:139818789:139820093	chr4	139818789	139820093	.	1305	0.856036	4.49807	6.84939e-07	4.07311e-05	24.2275	19.9641	21.6754	10.4939	13.8744	12.0264
chr4:139874976:139875477	chr4	139874976	139875477	.	502	1.55592	2.25264	3.84315e-05	0.000928404	12.7882	16.7072	10.0492	5.11499	2.6717	5.62049
chr4:140128834:140129903	chr4	140128834	140129903	.	1070	0.923273	3.33722	0.000198281	0.00328087	10.7994	12.1744	12.9654	6.55929	7.52072	4.77938
chr4:140288357:140289220	chr4	140288357	140289220	.	864	1.13079	2.75163	0.00021383	0.00347925	7.61593	9.29409	13.7628	5.34942	3.88077	4.69431
chr4:141566508:141567253	chr4	141566508	141567253	.	746	0.988802	3.46223	4.17368e-05	0.000992165	15.4898	18.1795	23.6682	9.17864	9.4387	10.1645
chr4:143012652:143013321	chr4	143012652	143013321	.	670	1.27244	3.17738	2.33519e-06	0.000106031	17.0073	21.3071	16.9412	8.94232	7.00624	6.84315
chr4:145815347:145816328	chr4	145815347	145816328	.	982	0.851158	3.63154	0.000187926	0.0031495	11.4404	17.4449	18.714	8.71597	7.34106	10.2358
chr4:145825070:145825462	chr4	145825070	145825462	.	393	2.03239	1.57769	8.57737e-05	0.00173296	9.80103	10.4434	12.378	3.48461	3.41271	0.897419
chr4:146206801:146207608	chr4	146206801	146207608	.	808	1.43646	3.27537	7.18718e-08	6.79539e-06	15.2944	19.6556	15.8316	6.14389	6.43209	6.11089
chr4:146220525:146221442	chr4	146220525	146221442	.	918	1.2831	4.69662	4.35837e-13	4.08627e-10	42.4831	34.9895	41.0186	16.969	12.7837	19.0174
chr4:148693348:148695102	chr4	148693348	148695102	.	1755	0.800241	3.75584	0.000180586	0.00306109	9.60207	8.74439	10.266	5.65728	6.01818	4.72257
chr4:148938920:148939463	chr4	148938920	148939463	.	544	2.95565	1.41588	1.12058e-06	5.91671e-05	7.67056	7.54462	7.6174	0.944016	0.924537	0.972478
chr4:149883911:149884478	chr4	149883911	149884478	.	568	1.28284	2.56967	0.00014771	0.00262167	13.8452	10.6817	17.4458	2.71238	9.74019	4.65694
chr4:150034990:150035578	chr4	150034990	150035578	.	589	1.12345	2.54087	0.000544656	0.00705399	14.4415	9.69489	14.0708	5.52199	5.12341	6.88605
chr4:150806743:150807481	chr4	150806743	150807481	.	739	0.945724	3.06624	0.000473521	0.0063276	10.4244	15.937	16.8222	7.41246	7.71323	7.1587
chr4:150918985:150919627	chr4	150918985	150919627	.	643	0.739299	4.42764	2.17834e-05	0.000597129	35.9422	39.6856	48.1942	21.5641	24.5086	27.9735
chr4:151157828:151158901	chr4	151157828	151158901	.	1074	0.673223	4.30891	0.000153702	0.00270244	23.6105	23.095	20.1305	13.5479	12.1757	16.2551
chr4:153406674:153407406	chr4	153406674	153407406	.	733	1.07113	3.42301	1.35568e-05	0.000413802	16.2024	21.6668	19.9094	11.2097	8.00509	8.17961
chr4:153602011:153602585	chr4	153602011	153602585	.	575	1.2885	4.03516	1.13521e-09	2.34778e-07	38.518	35.9997	44.4937	20.2441	15.1613	13.1874
chr4:154598222:154598654	chr4	154598222	154598654	.	433	2.26962	1.759	3.50105e-06	0.000145625	12.2315	13.1877	9.57012	1.58135	2.32309	3.25806
chr4:155628948:155629556	chr4	155628948	155629556	.	609	1.73261	2.59232	5.25424e-07	3.31531e-05	12.3861	17.5809	13.3129	4.2163	6.33159	2.31649
chr4:156827772:156828678	chr4	156827772	156828678	.	907	1.7527	2.38546	4.68649e-06	0.000182258	7.60876	7.47626	9.93208	4.71835	2.03323	0.583273
chr4:156887924:156888586	chr4	156887924	156888586	.	663	1.2733	2.33127	0.000567683	0.00728154	6.77793	17.7639	5.70668	3.3565	5.31016	3.72368
chr4:157243395:157244221	chr4	157243395	157244221	.	827	0.815769	3.96742	5.39345e-05	0.00121328	25.0344	23.3038	22.4393	15.9383	14.1904	10.0219
chr4:157244867:157245467	chr4	157244867	157245467	.	601	0.797636	4.20231	3.32512e-05	0.000835857	45.9311	30.8793	37.4725	16.52	29.0109	20.2457
chr4:157416031:157416780	chr4	157416031	157416780	.	750	0.765095	4.23987	3.74381e-05	0.000910111	30.6004	29.2652	33.6314	23.0525	14.3061	17.6343
chr4:157897190:157897880	chr4	157897190	157897880	.	691	0.81435	3.4245	0.000739632	0.00889045	16.955	21.176	19.5551	10.4047	14.3145	7.91118
chr4:158963387:158964396	chr4	158963387	158964396	.	1010	0.958909	2.97173	0.000516889	0.00676255	8.58075	11.1308	9.81113	4.74563	4.97968	5.4125
chr4:159927053:159927726	chr4	159927053	159927726	.	674	1.21474	2.68903	0.000103316	0.00199612	14.2871	14.2969	9.3559	5.58753	4.22855	6.5409
chr4:165569245:165569994	chr4	165569245	165569994	.	750	1.35379	2.4662	8.46635e-05	0.00171753	6.63366	11.6585	11.771	4.79308	4.02358	2.82148
chr4:169587638:169588162	chr4	169587638	169588162	.	525	1.70238	1.72087	0.00026865	0.00412822	10.0881	7.47776	8.23625	2.60848	1.91599	3.35891
chr4:170877589:170878191	chr4	170877589	170878191	.	603	1.10343	2.54943	0.000797022	0.0093645	17.8324	11.2454	8.06722	5.39378	7.22866	4.67908
chr4:170889987:170890767	chr4	170889987	170890767	.	781	1.67729	2.3691	3.66775e-06	0.00015105	9.24729	8.91091	10.1503	2.41101	3.2199	3.16107
chr4:174369387:174370514	chr4	174369387	174370514	.	1128	1.09679	3.11873	4.92157e-05	0.00112841	10.3864	9.01725	10.8612	4.40094	6.09364	3.59564
chr4:174382307:174382693	chr4	174382307	174382693	.	387	1.29721	3.17843	2.31225e-06	0.000105403	34.8354	35.5049	25.6053	8.40426	17.3281	13.2143
chr4:174756710:174757764	chr4	174756710	174757764	.	1055	1.36793	3.40643	8.20313e-08	7.55821e-06	15.5167	12.1783	14.3451	6.16578	4.92619	5.18163
chr4:177929436:177930204	chr4	177929436	177930204	.	769	2.09751	2.64812	2.97151e-09	5.12843e-07	15.2352	8.12176	14.0573	2.89384	3.27014	2.52246
chr4:178406505:178407053	chr4	178406505	178407053	.	549	1.67376	2.77277	1.32063e-07	1.10169e-05	17.2478	16.902	20.0187	5.61251	5.4967	5.78173
chr4:179553332:179553891	chr4	179553332	179553891	.	560	1.0664	2.8607	0.000223432	0.00358836	16.3358	17.526	16.4082	8.2534	6.58623	9.13203
chr4:180503434:180503709	chr4	180503434	180503709	.	276	1.86818	1.47188	0.000480031	0.00639181	20.3522	10.3447	10.4445	4.34156	4.8594	1.91677
chr4:181531078:181531973	chr4	181531078	181531973	.	896	0.908768	3.33207	0.000227903	0.00363984	14.5087	14.7378	13.2713	6.49573	7.48435	8.65969
chr4:182830137:182830849	chr4	182830137	182830849	.	713	2.10138	1.63093	4.18098e-05	0.000993411	6.30262	9.00993	3.53766	1.92069	1.64593	0.741975
chr4:182887249:182887627	chr4	182887249	182887627	.	379	1.44428	3.40222	2.57147e-08	2.97844e-06	37.2646	32.4876	48.9639	15.3567	14.1551	13.9585
chr4:183159372:183160263	chr4	183159372	183160263	.	892	0.614205	4.59587	0.00012941	0.00237212	31.3067	31.4082	34.3369	20.5341	20.1104	22.7348
chr4:183454987:183456040	chr4	183454987	183456040	.	1054	0.973171	2.9182	0.000630746	0.00787213	7.76573	12.0206	7.52124	5.03475	3.81744	5.01924
chr4:183899396:183900100	chr4	183899396	183900100	.	705	1.28581	3.56759	9.55802e-08	8.51265e-06	22.7648	19.9961	26.8335	8.49838	10.4632	9.505
chr4:185735827:185736886	chr4	185735827	185736886	.	1060	2.3759	1.42899	3.08402e-05	0.000790138	4.54222	3.53526	3.05946	0.322984	1.10712	0.665444
chr4:187825159:187825855	chr4	187825159	187825855	.	697	0.906623	3.10229	0.000647341	0.0080244	14.967	15.3613	16.0264	7.12233	6.97537	10.6261
chr4:189048217:189049014	chr4	189048217	189049014	.	798	1.80735	1.78441	0.000103921	0.00200557	5.22906	7.60299	5.41859	2.35965	2.10087	0.662943
chr4:189326356:189326829	chr4	189326356	189326829	.	474	2.33037	3.80449	8.96544e-18	4.78479e-14	43.6782	43.6705	57.0152	7.94514	13.4402	7.06859
chr4:189365779:189370617	chr4	189365779	189370617	.	4839	0.734065	6.64711	4.22275e-13	4.01335e-10	27.8929	23.7486	25.6904	15.8482	16.0408	14.6132
chr5:153159:153624	chr5	153159	153624	.	466	3.54077	1.57674	9.8999e-09	1.37097e-06	10.6765	12.6368	8.11916	1.10203	1.07929	0.378418
chr5:7926106:7926859	chr5	7926106	7926859	.	754	0.918142	4.48662	4.14114e-07	2.75468e-05	26.181	44.73	44.4446	24.0653	19.1218	17.5407
chr5:8525858:8526418	chr5	8525858	8526418	.	561	1.11212	2.99536	8.4927e-05	0.00172137	20.5979	16.2224	18.9481	8.23869	5.67796	11.9448
chr5:8773165:8773732	chr5	8773165	8773732	.	568	1.46258	2.67126	4.85289e-06	0.000187052	15.258	17.2792	14.2739	6.3289	5.90315	4.65694
chr5:9335480:9335728	chr5	9335480	9335728	.	249	1.83736	1.69872	0.000126364	0.00232673	15.4691	22.9329	16.642	3.43738	4.71303	7.08204
chr5:11053002:11053505	chr5	11053002	11053505	.	504	2.30671	1.1645	0.000308539	0.00458578	3.82123	11.684	3.57476	1.01894	1.99583	0.699773
chr5:13567697:13568538	chr5	13567697	13568538	.	842	1.31328	3.0609	4.60926e-06	0.00017986	15.058	8.47727	17.1181	4.47268	4.97771	6.91129
chr5:15573319:15574327	chr5	15573319	15574327	.	1009	0.835219	3.62938	0.000182589	0.00308675	17.0194	15.0327	13.7492	9.50066	8.14155	8.03941
chr5:27130606:27131432	chr5	27130606	27131432	.	827	2.07521	1.92397	3.5761e-06	0.000148214	5.23976	7.33638	7.84286	2.06991	1.41904	1.27939
chr5:28399988:28400702	chr5	28399988	28400702	.	715	0.86915	4.03369	1.0631e-05	0.000343061	30.7516	28.202	27.9701	15.3225	14.0685	18.2509
chr5:28707889:28708222	chr5	28707889	28708222	.	334	1.2702	2.3605	0.000321527	0.00472402	20.1816	20.3023	20.4982	12.813	6.52528	5.80769
chr5:33311832:33312552	chr5	33311832	33312552	.	721	2.25543	1.67079	9.05937e-06	0.000302765	6.67788	4.94997	7.99636	0.94969	2.09271	0.978323
chr5:33781458:33781813	chr5	33781458	33781813	.	356	1.17093	2.70399	0.00047884	0.00637902	17.1311	22.5565	32.8958	3.84678	6.59295	21.7952
chr5:35857870:35858379	chr5	35857870	35858379	.	510	0.87673	4.11293	5.4102e-06	0.000204664	43.1125	42.6872	43.4523	27.1877	21.6958	21.4377
chr5:36929035:36929456	chr5	36929035	36929456	.	422	2.13086	1.43117	0.000143094	0.00256402	9.88812	8.45718	8.9657	2.43386	0.397273	3.34299
chr5:38148072:38148346	chr5	38148072	38148346	.	275	1.40277	1.92338	0.00077621	0.00920886	14.5902	20.7647	19.6547	5.60231	7.31561	7.69496
chr5:40428337:40428515	chr5	40428337	40428515	.	179	2.44716	1.16017	0.00014015	0.00252627	21.5185	11.9629	20.1305	2.86897	5.61953	0.985155
chr5:52283309:52284110	chr5	52283309	52284110	.	802	1.9454	1.94101	1.22916e-05	0.000383448	7.80446	6.45256	6.5148	0.64033	2.92655	1.75903
chr5:52658267:52658770	chr5	52658267	52658770	.	504	1.13644	2.86617	0.000100464	0.00195627	17.514	17.703	21.806	9.17044	10.3118	6.29795
chr5:52669452:52670040	chr5	52669452	52670040	.	589	1.34913	2.66753	2.16439e-05	0.000594721	18.2563	12.1186	13.4591	5.23136	5.97731	5.98787
chr5:52693307:52694266	chr5	52693307	52694266	.	960	0.695425	4.4204	4.92049e-05	0.00112841	24.7425	27.6964	29.0896	16.0483	16.5903	17.6343
chr5:53656104:53657117	chr5	53656104	53657117	.	1014	1.72187	1.97534	4.58033e-05	0.00106746	5.22311	6.33538	4.79737	2.19464	1.15734	1.56517
chr5:53953835:53954393	chr5	53953835	53954393	.	559	3.30942	1.3852	4.2492e-07	2.81039e-05	6.60342	9.25752	6.44608	0.918685	1.19964	0
chr5:54716862:54717229	chr5	54716862	54717229	.	368	1.06127	4.0821	1.42238e-07	1.161e-05	52.3343	67.8873	63.1567	34.8876	28.7008	23.9596
chr5:54722724:54723648	chr5	54722724	54723648	.	925	0.73808	4.55353	9.44194e-06	0.000312987	28.2813	36.0751	29.606	17.0256	19.2117	20.0173
chr5:54929210:54931041	chr5	54929210	54931041	.	1832	1.41566	2.70845	8.54848e-06	0.000290083	5.08107	4.96767	4.72056	2.33599	2.10477	1.05883
chr5:55164618:55165214	chr5	55164618	55165214	.	597	0.656428	4.38653	0.000148761	0.00263548	39.2493	43.0424	44.363	22.6522	28.3628	29.2428
chr5:55307661:55308533	chr5	55307661	55308533	.	873	1.53146	2.29582	3.85522e-05	0.000930026	6.9859	5.92778	10.5253	3.33343	3.07261	1.61597
chr5:55465014:55465902	chr5	55465014	55465902	.	889	0.926988	3.38954	0.000164253	0.00284238	14.623	13.0473	17.2264	5.5841	8.67477	9.32296
chr5:56862706:56863393	chr5	56862706	56863393	.	688	1.38323	2.80183	6.57122e-06	0.000238254	14.4629	11.931	15.4505	6.46907	3.65515	5.89518
chr5:56999486:56999962	chr5	56999486	56999962	.	477	0.85704	3.67273	0.000118077	0.00221111	32.3002	38.9066	29.4614	19.379	14.7616	21.4421
chr5:57431418:57431936	chr5	57431418	57431936	.	519	2.42263	1.72193	1.41593e-06	7.12898e-05	9.89545	9.62718	9.3729	1.64915	1.93814	1.69887
chr5:57445107:57445598	chr5	57445107	57445598	.	492	1.65184	1.83251	0.000192668	0.00321176	8.80748	9.4301	11.7182	3.13137	2.72601	3.5842
chr5:57702833:57703387	chr5	57702833	57703387	.	555	1.22367	2.48474	0.000229726	0.00366315	12.4345	14.4686	12.9851	5.86027	6.04142	5.08375
[truncated: 798 more rows]

## Sheet: U5NSC Jun decreased in Fbw7-Del
Geneid	Chr	Start	End	Strand	Length	logFC	logCPM	PValue	FDR	Sample_NT_HsSc_U5F1_Jun_0218.FPKM	Sample_NT_HsSc_U5F2_Jun_0218.FPKM	Sample_NT_HsSc_U5F3_Jun_0218.FPKM	Sample_NT_HsSc_U5W1_Jun_0218.FPKM	Sample_NT_HsSc_U5W2_Jun_0218.FPKM	Sample_NT_HsSc_U5W3_Jun_0218.FPKM
chr1:1243311:1244225	chr1	1243311	1244225	.	915	-0.702224	3.95413	0.000483526	0.0064299	14.0321	14.6268	9.05763	18.8955	20.521	22.1633
chr1:1358009:1358666	chr1	1358009	1358666	.	658	-1.05803	3.31567	2.60486e-05	0.000690583	8.29289	10.0342	10.131	18.2108	20.8925	20.0999
chr1:1711101:1712359	chr1	1711101	1712359	.	1259	-0.788091	4.15242	2.95225e-05	0.000763996	11.8552	9.07115	9.44487	18.0835	16.6451	17.9284
chr1:2221919:2222691	chr1	2221919	2222691	.	773	-0.83349	4.02218	3.44982e-05	0.000855957	16.1945	14.0818	13.9846	34.3249	20.8206	23.9534
chr1:2261531:2262652	chr1	2261531	2262652	.	1122	-0.624366	4.7997	3.40167e-05	0.000849501	18.8814	20.0395	18.9481	28.2251	30.0334	30.9621
chr1:2461660:2461982	chr1	2461660	2461982	.	323	-1.61801	2.15409	5.19089e-05	0.0011781	6.9563	7.73453	3.90457	14.8393	12.976	30.0274
chr1:6496935:6498217	chr1	6496935	6498217	.	1283	-0.978304	3.05668	0.000329324	0.00480818	3.62764	5.28525	3.6511	10.0067	7.44818	7.28462
chr1:7360867:7361704	chr1	7360867	7361704	.	838	-0.674554	4.65898	2.47998e-05	0.000664321	21.2585	21.5073	26.0147	38.1992	39.2115	32.1962
chr1:8180842:8182030	chr1	8180842	8182030	.	1189	-0.765429	4.91932	8.28469e-07	4.71527e-05	24.2965	18.3099	13.0315	29.658	32.8531	32.6286
chr1:8205703:8206005	chr1	8205703	8206005	.	303	-0.984293	2.84602	0.000667765	0.00822174	18.009	11.1897	16.0546	28.2478	31.538	30.2634
chr1:8326628:8327174	chr1	8326628	8327174	.	547	-0.807218	3.45772	0.000643248	0.00798936	17.3108	12.0704	12.8456	25.0357	26.971	22.2443
chr1:8998305:8999298	chr1	8998305	8999298	.	994	-1.46831	4.63556	4.91565e-15	9.74422e-12	15.9846	11.669	11.4191	42.8815	33.9009	31.9333
chr1:9137955:9138444	chr1	9137955	9138444	.	490	-1.12073	4.86004	3.68604e-12	2.53205e-09	36.3563	38.6027	35.6659	80.6999	79.719	80.2539
chr1:9140496:9141220	chr1	9140496	9141220	.	725	-1.21069	2.39646	0.00061719	0.00774754	1.77094	5.1688	5.46717	9.20839	7.3997	11.9183
chr1:10544413:10545334	chr1	10544413	10545334	.	922	-1.28348	2.68694	6.75183e-05	0.00143738	5.57021	4.25794	1.56328	10.3971	8.36429	9.37179
chr1:10839086:10840023	chr1	10839086	10840023	.	938	-0.914666	3.84355	1.6743e-05	0.000487057	8.2128	12.7462	10.1801	17.8846	21.0902	19.5519
chr1:11039371:11039939	chr1	11039371	11039939	.	569	-0.759941	3.69255	0.00076208	0.00908941	15.2312	11.9173	22.1648	33.0931	19.4461	30.9917
chr1:12396061:12396887	chr1	12396061	12396887	.	827	-0.649267	5.37314	7.13406e-07	4.20528e-05	34.9317	45.3129	35.9465	67.4791	56.7616	57.7858
chr1:12537977:12538816	chr1	12537977	12538816	.	840	-0.634773	4.83033	2.80421e-05	0.00073177	24.4559	24.0053	30.2425	44.2219	42.1119	35.6884
chr1:12599710:12600814	chr1	12599710	12600814	.	1105	-0.859034	5.20236	2.77927e-09	4.82065e-07	24.8363	18.2484	27.229	36.2502	46.5777	44.8437
chr1:12609506:12610614	chr1	12609506	12610614	.	1109	-0.619792	6.85964	4.38327e-11	1.76866e-08	85.9622	76.9139	83.9917	119.009	130.763	129.753
chr1:12664189:12664629	chr1	12664189	12664629	.	441	-0.638962	4.51899	0.000113849	0.00215235	40.7598	35.6084	43.7142	58.6132	68.0482	60.3804
chr1:12668244:12668659	chr1	12668244	12668659	.	416	-2.22285	1.41552	7.36122e-05	0.00153785	1.92899	2.57375	1.29929	7.81839	9.26908	10.5975
chr1:15083195:15083805	chr1	15083195	15083805	.	611	-1.64521	2.16943	3.08926e-05	0.000791189	4.72807	2.33645	2.65387	13.7281	7.13402	10.1015
chr1:16442314:16443186	chr1	16442314	16443186	.	873	-1.0253	3.72083	5.40221e-06	0.000204588	9.92733	10.8335	8.25512	25.491	16.5153	17.1697
chr1:16502097:16503263	chr1	16502097	16503263	.	1167	-0.733848	5.07236	2.69661e-07	1.97562e-05	24.0669	21.7133	18.3719	34.471	35.4836	37.0214
chr1:17895691:17896709	chr1	17895691	17896709	.	1019	-0.742056	6.06218	4.42326e-10	1.13242e-07	39.3748	59.0152	48.2688	74.4195	72.8839	97.6028
chr1:19393009:19394296	chr1	19393009	19394296	.	1288	-0.609458	5.23305	5.73258e-06	0.000213716	23.4258	20.0891	25.1788	32.2959	33.4518	39.1568
chr1:19831275:19832202	chr1	19831275	19832202	.	928	-0.630644	4.87826	2.57729e-05	0.00068455	21.0991	23.6519	29.122	42.242	35.77	36.1047
chr1:19835286:19835820	chr1	19835286	19835820	.	535	-0.692561	4.64137	1.93441e-05	0.000544902	40.1979	28.0178	37.0439	53.7542	61.7326	55.0453
chr1:19967710:19967999	chr1	19967710	19967999	.	290	-1.82147	1.9656	2.25625e-05	0.000613876	3.87394	6.76866	5.59142	17.7084	15.6087	24.3231
chr1:22117937:22118451	chr1	22117937	22118451	.	515	-2.27584	2.76501	8.45049e-11	3.0378e-08	3.42798	3.11848	6.29713	16.6196	23.7639	21.9144
chr1:23017232:23018101	chr1	23017232	23018101	.	870	-0.69354	5.05487	1.10093e-06	5.83963e-05	26.3797	33.228	27.1287	46.0419	45.4773	48.6463
chr1:24329680:24330269	chr1	24329680	24330269	.	590	-0.862651	4.60444	3.06312e-07	2.16414e-05	30.4662	26.6158	29.3155	44.101	50.0107	63.3638
chr1:25005199:25005579	chr1	25005199	25005579	.	381	-1.03155	4.674	1.47107e-09	2.91094e-07	40.8601	43.0895	46.3424	71.8873	86.6848	107.842
chr1:30446769:30447770	chr1	30446769	30447770	.	1002	-0.639704	6.44547	8.94922e-10	1.96997e-07	56.8609	68.7429	77.857	100.283	111.766	104.363
chr1:31357896:31359196	chr1	31357896	31359196	.	1301	-1.01775	4.18673	2.13057e-07	1.61374e-05	6.5381	10.9729	9.83238	16.4471	20.489	18.1629
chr1:32056997:32057822	chr1	32056997	32057822	.	826	-0.894456	3.74377	4.47003e-05	0.0010488	12.4352	11.882	8.72484	24.04	20.4995	17.0792
chr1:32814735:32815253	chr1	32814735	32815253	.	519	-1.50863	1.88677	0.000465868	0.00625065	2.78309	2.75062	4.51288	8.57557	12.5979	7.47503
chr1:34127333:34128067	chr1	34127333	34128067	.	735	-0.625395	4.216	0.000677537	0.00831697	15.0666	20.6367	23.0419	32.1402	31.7051	26.3914
chr1:38478059:38479005	chr1	38478059	38479005	.	947	-0.600938	4.43948	0.00043275	0.00590795	15.4221	21.1046	17.3129	30.7295	26.9089	23.8351
chr1:41703624:41704984	chr1	41703624	41704984	.	1361	-0.749166	5.11438	1.62563e-07	1.28898e-05	19.2213	21.765	15.356	29.3059	30.6721	34.8539
chr1:43218506:43219185	chr1	43218506	43219185	.	680	-1.2012	2.90383	3.0579e-05	0.000784025	6.13645	6.56054	6.35887	15.1043	14.7926	14.0037
chr1:43438666:43439625	chr1	43438666	43439625	.	960	-0.616232	4.83423	3.56636e-05	0.000874017	21.3989	23.7929	24.3977	34.4146	36.1494	36.0033
chr1:44307106:44307588	chr1	44307106	44307588	.	483	-0.938851	3.02205	0.000647015	0.00802321	13.9558	11.0836	7.83339	22.6824	23.9499	16.7945
chr1:44555151:44555759	chr1	44555151	44555759	.	609	-0.767421	4.85403	6.45753e-07	3.87563e-05	28.7251	36.627	39.0512	52.001	64.417	60.8078
chr1:53882840:53883311	chr1	53882840	53883311	.	472	-0.961994	3.76029	1.07291e-05	0.000345187	21.4216	18.9032	16.4136	43.1581	32.3222	35.4927
chr1:55546639:55547395	chr1	55546639	55547395	.	757	-0.666914	4.45439	0.000103417	0.00199751	19.0809	26.6373	20.4682	39.573	34.7701	30.5164
chr1:57370157:57371307	chr1	57370157	57371307	.	1151	-0.890075	3.81185	3.36556e-05	0.000843274	9.06339	5.89137	10.018	15.0211	15.4395	15.9337
chr1:57482740:57483655	chr1	57482740	57483655	.	916	-0.826551	5.08892	7.92108e-09	1.14255e-06	25.931	28.2475	25.373	45.7855	48.1351	47.1659
chr1:57684277:57685140	chr1	57684277	57685140	.	864	-0.73653	3.79948	0.000443052	0.00602016	11.8883	12.8052	10.6349	20.0108	21.7323	17.1444
chr1:59058013:59058731	chr1	59058013	59058731	.	719	-0.757381	4.23136	4.44751e-05	0.00104422	14.9554	20.5995	21.8006	35.9505	31.9443	28.6955
chr1:61918205:61919930	chr1	61918205	61919930	.	1726	-0.750543	6.09961	4.24225e-11	1.76107e-08	31.3359	28.9485	28.0795	47.6055	57.502	43.6259
chr1:67865481:67866132	chr1	67865481	67866132	.	652	-0.955407	5.2699	3.0547e-11	1.3852e-08	31.7537	46.2538	42.0024	72.9885	85.3675	73.5663
chr1:68606045:68607845	chr1	68606045	68607845	.	1801	-0.938238	5.04665	5.60479e-10	1.35021e-07	10.0697	14.1687	13.205	25.8531	20.9445	24.7722
chr1:68682480:68683356	chr1	68682480	68683356	.	877	-1.06724	5.1069	1.31772e-12	1.06307e-09	27.8161	24.6203	22.8035	50.5542	56.3929	51.073
chr1:70507822:70508398	chr1	70507822	70508398	.	577	-2.17103	1.08616	0.00061672	0.00774442	1.11259	1.23706	0.936749	4.15345	4.64886	6.41802
chr1:94224013:94224900	chr1	94224013	94224900	.	888	-0.839156	4.54412	8.88434e-07	4.91936e-05	23.134	16.4782	15.8256	33.3496	34.7382	31.5749
chr1:95006668:95008203	chr1	95006668	95008203	.	1536	-0.603858	4.58166	0.000271779	0.00415981	12.7474	13.0117	10.7913	18.723	22.8117	14.0064
chr1:95082853:95083294	chr1	95082853	95083294	.	442	-1.08611	4.14258	4.37473e-08	4.61977e-06	21.06	30.2794	24.0496	49.5729	51.5844	58.6479
chr1:95552502:95553248	chr1	95552502	95553248	.	747	-0.634538	4.22239	0.000475352	0.00634473	17.6176	21.0218	19.0539	27.499	28.0538	33.9938
chr1:98667100:98667734	chr1	98667100	98667734	.	635	-1.38173	2.67996	2.31279e-05	0.000627292	3.5384	7.58749	4.82339	18.3313	8.71249	14.4407
chr1:99961457:99962222	chr1	99961457	99962222	.	766	-0.876665	4.29319	1.96048e-06	9.26552e-05	17.5996	21.1993	14.3476	35.5325	31.7352	30.388
chr1:100118270:100119333	chr1	100118270	100119333	.	1064	-0.639949	5.16038	3.96958e-06	0.000160495	27.9051	24.3184	25.7383	44.5651	32.9311	44.2514
chr1:110407081:110407306	chr1	110407081	110407306	.	226	-1.18656	3.08555	2.14085e-05	0.000590346	19.1738	18.1605	28.6993	65.8973	46.7341	37.4533
chr1:112451508:112452137	chr1	112451508	112452137	.	630	-0.80511	3.63886	0.000322247	0.00473075	13.5017	11.8964	16.5869	27.7151	20.2244	25.4717
chr1:113066696:113067202	chr1	113066696	113067202	.	507	-0.731634	4.66062	7.08336e-06	0.000251944	32.9214	39.4202	38.7343	54.0218	55.5525	74.7805
chr1:116199134:116199808	chr1	116199134	116199808	.	675	-1.07477	2.58522	0.000733233	0.00883415	4.51755	6.34477	5.33831	12.6801	9.18967	12.2787
chr1:117184900:117186562	chr1	117184900	117186562	.	1663	-0.730173	5.98149	4.67753e-10	1.17823e-07	22.9688	29.1867	33.2601	45.3945	44.5586	51.4289
chr1:144983936:144984581	chr1	144983936	144984581	.	646	-0.716661	4.36744	4.91599e-05	0.00112788	24.0986	28.452	18.6862	39.4831	38.1493	39.5816
chr1:150114283:150114680	chr1	150114283	150114680	.	398	-1.00157	2.8586	0.000558853	0.00719128	12.9039	8.51881	13.1278	27.9568	18.9553	22.5967
chr1:153746001:153746763	chr1	153746001	153746763	.	763	-1.24466	3.2049	3.98012e-06	0.000160827	9.46544	4.91137	6.13941	16.1534	14.2821	18.7205
chr1:153962803:153963483	chr1	153962803	153963483	.	681	-0.607448	4.48573	0.000256674	0.00398837	26.1595	26.7277	24.0753	39.4648	42.097	35.7347
chr1:155165937:155166455	chr1	155165937	155166455	.	519	-0.634244	4.82612	2.73192e-05	0.000716599	48.2403	43.3223	35.0616	65.9659	65.8969	65.2366
chr1:156474782:156475225	chr1	156474782	156475225	.	444	-1.02749	3.2507	9.46504e-05	0.00186717	14.4587	18.8896	7.30411	27.3736	25.676	30.1848
chr1:156643331:156644192	chr1	156643331	156644192	.	862	-0.670716	5.83809	1.16103e-08	1.55207e-06	44.4983	52.1677	56.2241	71.6897	90.6318	80.6021
chr1:156659847:156660917	chr1	156659847	156660917	.	1071	-0.919865	3.73654	2.58006e-05	0.000684791	8.54158	8.16422	8.4112	12.9465	17.845	16.7945
chr1:156765123:156766433	chr1	156765123	156766433	.	1311	-0.640815	5.91166	2.2032e-08	2.66768e-06	34.2774	32.6676	40.1289	49.7484	60.8704	56.2252
chr1:157051252:157052148	chr1	157051252	157052148	.	897	-0.672347	5.06327	2.18919e-06	0.000100988	24.5121	31.631	29.325	46.3736	48.0333	41.4808
chr1:160276646:160277574	chr1	160276646	160277574	.	929	-1.04678	3.67372	5.27573e-06	0.000200564	6.56479	11.5251	8.14538	19.532	14.9784	19.5515
chr1:160345501:160346540	chr1	160345501	160346540	.	1040	-0.604273	4.71411	0.000114653	0.00216394	21.6047	16.6436	20.9619	32.2611	32.0791	25.7732
chr1:160380000:160381550	chr1	160380000	160381550	.	1551	-0.902416	4.31526	8.94384e-07	4.94835e-05	10.6581	7.93863	7.66672	17.8797	16.5379	14.8942
chr1:160434830:160435201	chr1	160434830	160435201	.	372	-1.73253	1.57622	0.000501741	0.00662053	3.45144	2.87817	3.39026	13.3448	9.91475	9.48079
chr1:161641443:161641816	chr1	161641443	161641816	.	374	-1.30771	2.34665	0.000252511	0.00393778	4.72035	7.15695	10.1164	20.5967	13.4478	20.2747
chr1:162122038:162122639	chr1	162122038	162122639	.	602	-0.863881	3.24765	0.000729389	0.00879475	12.2635	11.5605	8.37991	19.3361	24.5069	14.9393
chr1:162229592:162230031	chr1	162229592	162230031	.	440	-1.51882	1.9763	0.000292312	0.00440022	3.28279	2.83892	6.55156	13.6167	8.38247	14.428
chr1:166153979:166154791	chr1	166153979	166154791	.	813	-1.29104	2.4616	0.000152924	0.00269217	3.94814	4.38983	2.65931	7.36944	8.24843	11.4959
chr1:166916396:166917262	chr1	166916396	166917262	.	867	-0.932224	4.65901	1.81715e-08	2.26752e-06	17.5856	21.4054	20.365	35.7369	37.1265	40.272
chr1:167105291:167105969	chr1	167105291	167105969	.	679	-0.624283	6.26172	4.17168e-09	6.8262e-07	82.9641	90.1431	92.6047	121.012	150.86	137.386
chr1:167132283:167133014	chr1	167132283	167133014	.	732	-1.33254	2.41697	0.000136798	0.00247937	3.06952	2.68157	5.90715	8.65262	9.61923	11.0816
chr1:167298065:167298380	chr1	167298065	167298380	.	316	-0.983059	2.94534	0.000490378	0.00650276	18.2839	10.7294	17.6747	28.1691	36.0764	28.4604
chr1:167458242:167459058	chr1	167458242	167459058	.	817	-1.0805	3.13994	7.02929e-05	0.0014837	5.10745	8.73668	6.17467	10.0572	16.2109	15.9723
chr1:176485812:176487182	chr1	176485812	176487182	.	1371	-0.621114	6.56304	4.27987e-10	1.11213e-07	53.6143	51.933	56.9021	78.5363	90.4891	80.7755
chr1:179320432:179320809	chr1	179320432	179320809	.	378	-1.41154	2.50127	3.91916e-05	0.00094087	4.6704	7.08121	11.4392	19.0202	18.1842	24.2588
chr1:180892137:180892725	chr1	180892137	180892725	.	589	-0.997889	3.00169	0.000392595	0.00549935	10.3543	6.36227	9.17664	20.6348	20.209	11.0776
chr1:181120881:181121597	chr1	181120881	181121597	.	717	-0.804619	3.5969	0.000397702	0.00555112	9.40119	11.9462	14.5743	22.4422	18.0042	22.1351
chr1:182730929:182731682	chr1	182730929	182731682	.	754	-0.827339	3.58745	0.000263978	0.0040772	10.6427	9.46666	13.3812	21.1139	18.8995	19.4117
chr1:183221886:183222428	chr1	183221886	183222428	.	543	-0.78824	3.55277	0.000528468	0.00688697	14.7783	17.0888	14.2674	26.4811	25.0085	28.2538
chr1:195403887:195404299	chr1	195403887	195404299	.	413	-1.11997	2.91144	0.00010991	0.00209092	7.3834	10.8019	14.8322	23.6255	25.5736	22.203
chr1:202500845:202501973	chr1	202500845	202501973	.	1129	-0.985462	5.04458	6.06109e-11	2.32616e-08	19.7594	19.1249	19.3094	42.9091	33.8566	38.5799
chr1:203115813:203117144	chr1	203115813	203117144	.	1332	-0.636839	5.70617	1.11984e-07	9.65412e-06	32.5321	32.8224	25.9702	47.679	42.2899	52.2938
chr1:203298029:203299134	chr1	203298029	203299134	.	1106	-1.3076	2.12496	0.000649318	0.00804459	2.03154	1.61344	2.60641	4.95281	4.54745	6.05879
chr1:203965873:203966231	chr1	203965873	203966231	.	359	-0.716039	5.05045	8.86709e-07	4.91766e-05	80.9165	51.6948	74.2754	116.346	113.479	111.012
chr1:208244719:208245579	chr1	208244719	208245579	.	861	-0.632894	4.80407	4.24989e-05	0.00100599	19.945	23.8343	31.8067	39.3658	39.1377	38.2998
chr1:208374347:208375284	chr1	208374347	208375284	.	938	-0.709674	5.79506	1.3574e-09	2.71402e-07	47.3947	41.8531	44.5618	69.7136	74.352	75.0115
chr1:208380745:208381655	chr1	208380745	208381655	.	911	-0.609946	5.56299	6.90889e-07	4.09691e-05	39.4623	36.4337	46.4758	61.8208	58.3368	66.5883
chr1:208405348:208405688	chr1	208405348	208405688	.	341	-0.736014	3.88355	0.000295199	0.00443037	32.4749	33.4914	29.0594	57.2279	52.6055	48.6106
chr1:208688453:208688797	chr1	208688453	208688797	.	345	-2.48008	1.41452	1.64502e-05	0.00048177	2.32597	1.55171	2.0889	11.4121	12.6344	10.2228
chr1:211688435:211689220	chr1	211688435	211689220	.	786	-1.06922	3.37244	1.65605e-05	0.00048337	7.55496	8.62719	8.48119	14.5918	18.7699	18.3971
chr1:214281118:214281725	chr1	214281118	214281725	.	608	-0.7816	3.6583	0.000441701	0.00600298	15.0461	17.6099	11.8532	23.3685	22.8863	30.4539
chr1:214296560:214297019	chr1	214296560	214297019	.	460	-1.20441	3.11032	9.22943e-06	0.000307559	10.4669	11.6378	10.5751	26.4215	22.5962	26.4514
chr1:214378304:214378943	chr1	214378304	214378943	.	640	-1.1201	4.58899	1.84292e-10	5.68275e-08	20.563	25.0941	24.4916	45.4701	48.7231	58.138
chr1:225961873:225962354	chr1	225961873	225962354	.	482	-0.689234	3.88071	0.000822116	0.00958468	21.3101	19.6217	27.6606	29.8325	37.2168	43.5369
chr1:226997844:226998513	chr1	226997844	226998513	.	670	-0.961426	3.15816	0.000278132	0.00423176	8.14436	9.85451	8.06722	20.9506	12.5111	17.3711
chr1:229366209:229366789	chr1	229366209	229366789	.	581	-0.835951	3.34912	0.00071247	0.00862823	13.5355	10.4427	12.404	26.2223	23.0843	15.7828
chr1:230875733:230876102	chr1	230875733	230876102	.	370	-2.24349	1.12438	0.000574468	0.00735362	3.03633	1.92915	0	6.01449	5.43728	13.3449
chr1:232820193:232820937	chr1	232820193	232820937	.	745	-0.753784	4.13449	8.19855e-05	0.00168025	18.0957	18.4435	14.9938	28.0324	23.6284	35.5052
chr1:233191472:233192395	chr1	233191472	233192395	.	924	-1.22012	4.38346	1.47953e-10	4.82106e-08	13.0269	12.1668	14.819	32.2355	36.1063	24.8101
chr1:234832625:234833294	chr1	234832625	234833294	.	670	-0.880949	3.51355	0.000183797	0.00309887	10.3002	9.32184	15.3277	19.9286	23.2707	21.0558
chr1:234879557:234880329	chr1	234879557	234880329	.	773	-1.09426	4.02776	7.97922e-08	7.40105e-06	13.4954	14.7744	11.1877	27.017	28.1946	29.2003
chr1:234881342:234882235	chr1	234881342	234882235	.	894	-0.663447	4.37226	0.00013497	0.00245394	17.7726	18.164	16.9285	27.5729	31.6921	24.4592
chr1:235120048:235120496	chr1	235120048	235120496	.	449	-1.18336	4.36656	2.65535e-10	7.51951e-08	25.3784	27.0253	30.4961	61.3814	62.3551	64.4103
chr1:235253620:235254673	chr1	235253620	235254673	.	1054	-0.895603	4.64138	1.71222e-07	1.34079e-05	11.5725	19.3007	18.2903	29.8837	25.9268	35.302
chr1:235805061:235806300	chr1	235805061	235806300	.	1240	-0.625403	4.13883	0.000836423	0.00972207	8.80116	11.5127	12.6408	18.0845	15.6833	16.9232
chr1:236063806:236065019	chr1	236063806	236065019	.	1214	-0.794464	4.56941	1.93545e-06	9.17225e-05	15.4675	12.7882	13.9504	27.6372	23.0621	22.6602
chr1:236724454:236725357	chr1	236724454	236725357	.	904	-0.682848	4.52919	4.64915e-05	0.00107915	15.4456	20.7267	21.9231	32.5699	32.2688	28.09
chr1:240270405:240271068	chr1	240270405	240271068	.	664	-0.651396	4.83386	1.57078e-05	0.000463946	29.7297	35.2056	34.1885	47.6937	50.4968	57.3645
chr1:244191947:244192422	chr1	244191947	244192422	.	476	-1.38418	2.10343	0.000445963	0.00604196	5.73185	3.37399	4.54205	17.6216	9.50952	8.89123
chr1:244318132:244319234	chr1	244318132	244319234	.	1103	-0.752269	3.77128	0.000401957	0.00558978	8.43928	8.41271	10.1273	12.7261	17.0233	15.6678
chr1:244320912:244321495	chr1	244320912	244321495	.	584	-1.42759	3.29589	9.28848e-08	8.32603e-06	8.51926	9.7779	8.02118	23.1564	29.2812	18.4194
chr1:244377419:244378153	chr1	244377419	244378153	.	735	-0.652758	5.53701	1.57036e-07	1.2552e-05	49.1301	46.6146	50.4961	72.199	87.3601	70.2972
chr1:246541060:246541689	chr1	246541060	246541689	.	630	-1.38376	2.90694	4.09148e-06	0.000164085	7.89722	5.66497	5.14766	22.5525	14.1038	12.5959
chr1:246795870:246796355	chr1	246795870	246796355	.	486	-0.627975	4.84095	2.53823e-05	0.000676536	47.2229	48.467	41.5202	73.2629	69.6814	69.3034
chr1:247107227:247107800	chr1	247107227	247107800	.	574	-1.05133	3.98123	3.03414e-07	2.15464e-05	19.2926	17.0985	16.008	34.5942	34.4645	39.9383
chr1:247197124:247197951	chr1	247197124	247197951	.	828	-0.61683	4.22395	0.000679307	0.00833132	15.7003	17.4567	19.3659	22.9483	29.1564	28.3256
chr10:3145115:3145595	chr10	3145115	3145595	.	481	-0.899947	3.87011	4.64829e-05	0.00107915	14.0138	31.5342	16.8556	32.7416	33.4602	49.8599
chr10:3514440:3515218	chr10	3514440	3515218	.	779	-0.614131	5.8514	7.14041e-08	6.76778e-06	62.2189	56.8097	55.5075	88.5574	96.845	81.9462
chr10:3827240:3827910	chr10	3827240	3827910	.	671	-0.747866	4.42629	1.69752e-05	0.000491047	22.244	22.605	25.7766	33.1648	40.2259	45.2026
chr10:4128161:4128962	chr10	4128161	4128962	.	802	-1.3594	3.39554	9.85594e-08	8.69981e-06	7.00401	6.89756	7.4134	16.0083	19.4406	19.3493
chr10:4473547:4474089	chr10	4473547	4474089	.	543	-1.02173	3.1578	0.000133729	0.00243712	14.4827	9.85893	6.63602	20.8066	21.3035	21.4339
chr10:6244267:6245016	chr10	6244267	6245016	.	750	-0.964148	3.20481	0.00023755	0.00375341	10.4855	5.23443	8.16761	17.5746	13.1884	16.2235
chr10:6260672:6261613	chr10	6260672	6261613	.	942	-0.686127	6.3286	7.46069e-11	2.76803e-08	64.2308	68.7645	62.3511	109.396	97.8845	107.079
chr10:8101744:8102459	chr10	8101744	8102459	.	716	-0.947065	3.20121	0.000754719	0.00903015	13.2249	2.24304	9.56199	12.9103	19.6684	16.2551
chr10:12549227:12550040	chr10	12549227	12550040	.	814	-0.964734	3.15689	0.000244453	0.003838	7.68941	6.79588	6.86143	16.4031	10.9157	14.5147
chr10:13857338:13859152	chr10	13857338	13859152	.	1815	-0.809466	5.24136	6.63484e-09	9.87822e-07	14.767	13.3712	16.8752	30.1808	23.8312	24.8726
chr10:14032731:14033736	chr10	14032731	14033736	.	1006	-0.634152	5.07126	9.50421e-06	0.000314551	21.2181	25.1883	31.5204	37.9458	37.4961	45.2251
chr10:14226938:14227264	chr10	14226938	14227264	.	327	-2.01628	1.18085	0.000823869	0.00960028	1.9632	2.18283	2.75486	9.42284	7.69034	11.3248
chr10:15669781:15670183	chr10	15669781	15670183	.	403	-1.04839	3.22785	8.66178e-05	0.00174392	13.9385	10.1843	19.6709	26.7604	22.4642	41.5696
chr10:17273327:17273565	chr10	17273327	17273565	.	239	-1.59041	3.19778	2.61743e-08	3.02662e-06	28.8751	11.1996	14.323	53.7181	59.6243	53.1242
chr10:22792428:22793222	chr10	22792428	22793222	.	795	-0.768107	4.72536	1.3854e-06	7.01086e-05	28.4646	21.5483	22.6626	38.1121	41.7542	44.363
chr10:24664232:24665368	chr10	24664232	24665368	.	1137	-0.977573	4.98486	6.17054e-10	1.46113e-07	19.9027	13.6542	22.0258	31.4661	34.7979	43.4265
chr10:29050351:29051104	chr10	29050351	29051104	.	754	-0.693738	3.88052	0.000646113	0.00801634	14.8998	13.2533	15.5317	26.1086	24.2358	20.3472
chr10:29346733:29347613	chr10	29346733	29347613	.	881	-0.778928	5.78115	1.42062e-10	4.69346e-08	49.7324	44.1559	42.9458	73.4468	70.9798	90.8736
chr10:33734483:33735227	chr10	33734483	33735227	.	745	-1.68166	2.64883	4.61393e-07	2.99173e-05	5.17021	2.39526	3.62754	12.6376	11.7017	12.0718
chr10:35240391:35240736	chr10	35240391	35240736	.	346	-1.25515	4.41899	2.68936e-11	1.26931e-08	29.2225	38.6806	40.0952	90.0435	80.9175	86.1327
chr10:44740703:44741538	chr10	44740703	44741538	.	836	-0.805655	3.55293	0.000822823	0.00959131	6.71915	10.2457	12.9307	12.9	25.2677	13.7109
chr10:44791196:44791590	chr10	44791196	44791590	.	395	-0.829431	4.98936	2.47803e-08	2.90906e-06	56.4769	53.3081	62.0325	90.5746	100.165	114.734
chr10:45906354:45906837	chr10	45906354	45906837	.	484	-0.859395	3.6512	0.00014596	0.00259871	13.2638	18.8033	21.9626	37.4902	26.6715	33.5197
chr10:48335793:48336748	chr10	48335793	48336748	.	956	-0.761118	4.75207	1.54427e-06	7.66391e-05	17.6272	24.8257	19.5999	33.8424	37.8789	33.2026
chr10:52294381:52294870	chr10	52294381	52294870	.	490	-0.697376	4.20882	0.000155913	0.00272955	25.2201	32.0476	27.5767	39.1272	46.8734	51.4633
chr10:73715969:73716724	chr10	73715969	73716724	.	756	-0.97636	3.56428	5.80509e-05	0.00127981	12.3129	12.5101	5.71962	13.8123	21.9541	24.7253
chr10:74094379:74095534	chr10	74094379	74095534	.	1156	-0.676078	4.71938	1.72686e-05	0.000498375	19.8532	14.9735	16.9882	24.8776	28.57	29.5939
chr10:77176867:77178519	chr10	77176867	77178519	.	1653	-0.67614	6.21899	1.137e-09	2.34778e-07	32.5256	41.2381	29.8645	61.6171	54.2604	49.6064
chr10:77289940:77290683	chr10	77289940	77290683	.	744	-0.635866	5.16368	4.47763e-06	0.000175811	33.4358	42.9327	35.8399	49.4678	64.6712	59.966
chr10:79604573:79605449	chr10	79604573	79605449	.	877	-0.650407	4.41116	0.000135504	0.00246171	18.3001	18.7196	18.6947	31.0352	28.6744	27.7483
chr10:79632819:79634149	chr10	79632819	79634149	.	1331	-0.616622	6.67607	3.30678e-10	8.92703e-08	53.7786	64.0853	63.6205	88.0987	99.8843	89.96
chr10:80416624:80417514	chr10	80416624	80417514	.	891	-1.15934	2.62817	0.000264479	0.0040813	5.58389	3.80526	2.62871	8.64553	9.40793	9.10411
chr10:80828269:80828980	chr10	80828269	80828980	.	712	-0.665337	4.19958	0.000311021	0.00460885	22.3156	17.2933	18.9784	31.4955	26.3718	35.4172
chr10:80886903:80887509	chr10	80886903	80887509	.	607	-0.718685	3.83279	0.000536571	0.00696879	14.5421	19.9907	17.5122	27.0732	27.0669	31.3756
chr10:80935597:80936344	chr10	80935597	80936344	.	748	-0.708602	3.80597	0.000804212	0.0094346	13.9465	15.9839	11.5616	17.6216	26.6715	23.5752
chr10:80982948:80983532	chr10	80982948	80983532	.	585	-1.63703	2.09544	4.98329e-05	0.00114039	3.01779	4.88059	1.84788	8.48592	10.89	11.1533
chr10:82224286:82225232	chr10	82224286	82225232	.	947	-0.69118	4.08189	0.000406297	0.00563553	14.5748	16.3937	9.13206	18.4377	22.4831	24.0213
chr10:86586136:86586906	chr10	86586136	86586906	.	771	-0.827891	3.39714	0.000597292	0.00755873	11.2407	9.72083	7.47779	15.5418	18.4827	16.6965
chr10:88677538:88678401	chr10	88677538	88678401	.	864	-0.715906	4.53405	2.25514e-05	0.000613815	16.5321	24.3712	19.1846	31.7003	29.8819	36.9422
chr10:98210810:98211031	chr10	98210810	98211031	.	222	-0.858292	3.26294	0.000845312	0.00979912	40.4844	20.8992	26.7817	51.6629	67.2108	42.0998
chr10:99292586:99293416	chr10	99292586	99293416	.	831	-0.650754	4.17112	0.000404425	0.00561967	16.8024	16.1053	16.6943	27.1913	23.2006	27.5867
chr10:99334207:99335196	chr10	99334207	99335196	.	990	-0.762278	5.32334	1.19429e-08	1.58735e-06	30.153	30.1016	28.9361	50.1441	55.5444	45.5997
chr10:100193715:100194622	chr10	100193715	100194622	.	908	-0.678273	5.55292	5.20809e-08	5.28271e-06	37.2949	38.5193	42.6609	55.6152	66.4689	67.3909
chr10:112120702:112121279	chr10	112120702	112121279	.	578	-0.856682	3.9365	5.78415e-05	0.00127682	13.6057	23.4636	18.3908	23.9891	30.7454	45.4586
chr10:115666790:115667371	chr10	115666790	115667371	.	582	-1.03905	3.52851	1.5419e-05	0.000456971	11.0304	17.4767	9.28701	27.942	22.7565	26.9665
chr10:116383413:116384151	chr10	116383413	116384151	.	739	-0.808622	5.97962	3.16985e-12	2.22146e-09	59.7229	57.7114	67.7763	107.017	107.758	109.528
chr10:118014239:118014920	chr10	118014239	118014920	.	682	-0.873737	3.68773	7.46577e-05	0.00155595	13.8842	12.5593	12.4163	21.5859	28.0235	21.7196
chr10:121154711:121155513	chr10	121154711	121155513	.	803	-0.741389	4.77147	1.82097e-06	8.75243e-05	22.5848	27.7781	25.1293	41.5696	44.4699	39.9681
chr10:121452767:121453353	chr10	121452767	121453353	.	587	-0.785804	4.70124	1.18489e-06	6.19666e-05	34.7231	27.3598	34.0692	51.3253	49.695	65.1897
chr10:121485086:121485802	chr10	121485086	121485802	.	717	-0.661486	4.1626	0.000431709	0.0059007	20.8169	21.6525	14.323	26.0234	30.6305	33.4486
chr10:121509623:121510608	chr10	121509623	121510608	.	986	-0.600451	4.61648	0.000182403	0.00308512	19.3697	19.3649	19.7344	25.0001	30.2653	33.4443
chr10:123468301:123469520	chr10	123468301	123469520	.	1220	-0.767823	3.94896	0.000165751	0.00286018	11.0503	9.5074	6.79322	17.96	15.803	13.0089
chr10:128770914:128771826	chr10	128770914	128771826	.	913	-0.619603	4.80648	5.33198e-05	0.00120264	19.1606	28.5358	24.075	34.1238	38.9284	36.891
chr10:134513495:134514883	chr10	134513495	134514883	.	1389	-1.12371	5.33324	7.61471e-15	1.39182e-11	16.4074	19.2707	18.6783	42.0251	40.1924	36.0557
chr10:134528677:134529335	chr10	134528677	134529335	.	659	-1.71898	4.65757	2.13374e-18	1.48039e-14	20.2137	19.2257	13.123	67.2777	55.2047	51.3775
chr10:134602394:134603079	chr10	134602394	134603079	.	686	-1.55944	2.49026	7.734e-06	0.000269912	2.80744	4.68227	4.20217	12.4768	13.93	7.96884
chr11:2420550:2422030	chr11	2420550	2422030	.	1481	-0.652414	4.77007	2.12935e-05	0.000588115	15.4965	14.5794	12.2869	22.7703	22.8664	21.0754
chr11:2846830:2848043	chr11	2846830	2848043	.	1214	-0.779332	3.73739	0.0005625	0.0072311	7.66765	6.46759	9.49815	16.0747	16.8478	7.5534
chr11:12777110:12778636	chr11	12777110	12778636	.	1527	-0.601961	6.02699	4.01911e-08	4.3165e-06	32.792	35.5257	32.9187	46.747	54.7852	52.0829
chr11:15892248:15892960	chr11	15892248	15892960	.	713	-0.797024	4.78041	3.73421e-07	2.52761e-05	26.336	24.7773	32.3443	50.6582	47.4967	46.7444
chr11:19665842:19666229	chr11	19665842	19666229	.	388	-1.58114	2.54549	4.88644e-06	0.000188136	10.7546	5.51897	4.6435	15.0004	25.061	23.6336
chr11:19681525:19682370	chr11	19681525	19682370	.	846	-0.837727	4.09744	1.3112e-05	0.000403956	14.0383	13.4995	15.1205	27.3162	24.7709	24.1794
chr11:19697927:19698646	chr11	19697927	19698646	.	720	-0.668533	6.11047	1.14951e-09	2.36656e-07	71.3297	70.883	79.0737	128.624	111.533	111.439
chr11:19911736:19912573	chr11	19911736	19912573	.	838	-0.668758	5.03833	2.54801e-06	0.000113466	28.9192	27.6826	33.3246	50.4557	48.2142	44.1909
chr11:20021819:20022751	chr11	20021819	20022751	.	933	-0.73226	5.121	2.59406e-07	1.91464e-05	27.5227	32.1319	23.5589	42.1991	44.5627	51.5987
chr11:27180214:27180717	chr11	27180214	27180717	.	504	-1.49	1.78356	0.000845957	0.00980496	2.54749	4.24873	2.85981	8.49115	9.64649	9.09705
chr11:28723567:28724383	chr11	28723567	28724383	.	817	-0.673183	3.98882	0.000603088	0.00761044	14.5366	15.726	13.6725	26.4001	23.8033	19.8574
chr11:31896147:31896827	chr11	31896147	31896827	.	681	-0.79322	4.43957	5.20706e-06	0.000198389	24.9811	19.3907	24.3399	35.4429	39.389	44.5388
chr11:31897173:31898330	chr11	31897173	31898330	.	1158	-0.763271	4.42291	1.18082e-05	0.000371208	15.9383	12.482	11.9801	21.5825	21.861	25.4311
chr11:31898599:31899016	chr11	31898599	31899016	.	418	-1.28345	3.42798	3.44824e-07	2.3687e-05	12.2865	17.93	13.3617	38.9049	32.086	35.0154
chr11:31904127:31905157	chr11	31904127	31905157	.	1031	-1.08078	5.1788	1.25868e-12	1.02738e-09	16.9676	24.5775	25.6884	45.9916	53.3356	42.247
chr11:34702365:34703591	chr11	34702365	34703591	.	1227	-0.643724	6.11121	2.47561e-09	4.41537e-07	43.4257	43.4845	44.3445	69.6166	67.9069	67.5477
chr11:34931153:34932152	chr11	34931153	34932152	.	1000	-1.12311	2.77617	0.000192236	0.00320609	4.17279	3.74738	4.32403	11.6403	8.04717	7.05371
chr11:36384435:36385544	chr11	36384435	36385544	.	1110	-0.615609	5.52031	5.4556e-07	3.41032e-05	33.6888	32.9564	30.5149	49.1954	47.7272	52.1085
chr11:40161873:40162663	chr11	40161873	40162663	.	791	-0.660926	5.31629	5.59685e-07	3.47457e-05	41.7969	37.9002	36.2158	56.0506	58.7091	68.8874
chr11:45200750:45201328	chr11	45200750	45201328	.	579	-1.19618	3.12522	1.64942e-05	0.000482296	7.20689	5.85576	13.3804	23.0607	19.1103	18.2739
chr11:47940622:47941406	chr11	47940622	47941406	.	785	-0.840733	4.37856	2.15122e-06	9.94348e-05	16.3559	20.6862	19.0496	33.146	35.6655	31.4497
chr11:63771609:63772453	chr11	63771609	63772453	.	845	-1.32911	4.5263	9.77431e-13	8.44751e-10	17.2837	11.826	16.6309	36.0596	41.6643	37.5641
chr11:65065925:65066798	chr11	65065925	65066798	.	874	-1.07321	2.77703	0.000356442	0.00510844	5.6925	3.47093	5.15355	10.1847	7.86456	12.3077
chr11:65625661:65626366	chr11	65625661	65626366	.	706	-0.966226	3.01568	0.000384083	0.0054151	7.50174	7.0772	7.65586	13.3357	14.7227	15.4862
chr11:66175977:66176664	chr11	66175977	66176664	.	688	-0.964396	3.1076	0.000389394	0.00546939	11.1971	5.1874	7.85616	17.4167	12.4275	17.9418
chr11:66185316:66186543	chr11	66185316	66186543	.	1228	-0.675065	4.76629	1.26514e-05	0.000392031	15.4219	18.8909	16.2855	26.4857	29.6253	24.5559
chr11:68238733:68239779	chr11	68238733	68239779	.	1047	-0.829603	4.05093	2.60104e-05	0.000689833	11.0367	11.5897	10.8411	15.3687	22.2572	21.8955
chr11:68508844:68509295	chr11	68508844	68509295	.	452	-1.58112	2.20611	3.75501e-05	0.000912115	4.97099	5.9219	3.18881	10.9829	17.0617	14.4351
chr11:68856568:68857204	chr11	68856568	68857204	.	637	-1.35199	2.17935	0.000432932	0.00590927	4.78704	4.48217	1.69703	11.018	6.57965	10.7965
chr11:69019297:69020179	chr11	69019297	69020179	.	883	-0.770486	3.85238	0.000190458	0.00318255	11.8142	10.7108	12.8546	19.7741	22.214	18.3732
chr11:69285617:69286812	chr11	69285617	69286812	.	1196	-1.26453	5.62668	1.87498e-19	2.16811e-15	23.7517	26.5581	21.9937	55.9632	56.2102	61.6315
chr11:69298378:69298942	chr11	69298378	69298942	.	565	-1.30152	2.31051	0.000276218	0.00420725	3.97679	5.68502	4.46434	13.331	12.4624	9.05122
chr11:69472851:69473266	chr11	69472851	69473266	.	416	-1.30537	3.09771	3.23432e-06	0.000136828	10.4165	11.5819	12.1267	21.8092	24.5832	38.1511
chr11:72411053:72411801	chr11	72411053	72411801	.	749	-1.03769	4.80306	4.32075e-10	1.11744e-07	17.7848	30.2573	24.5356	46.6236	47.8998	53.9152
chr11:72960186:72961220	chr11	72960186	72961220	.	1035	-0.768427	4.33513	1.72827e-05	0.000498575	11.6298	15.8619	15.1446	25.4705	24.621	22.3197
chr11:74398266:74399241	chr11	74398266	74399241	.	976	-0.698134	5.26631	1.78058e-07	1.38339e-05	30.9144	27.608	30.8279	51.5649	46.8937	46.6152
chr11:74431159:74431675	chr11	74431159	74431675	.	517	-1.13337	2.80778	0.000136377	0.00247279	6.20858	8.9741	9.06067	16.5553	19.7807	16.7133
chr11:76855628:76855913	chr11	76855628	76855913	.	286	-3.05379	1.36773	1.81328e-06	8.73648e-05	0.56116	3.74363	0.629958	14.3649	16.4132	11.0985
chr11:85375795:85377575	chr11	85375795	85377575	.	1781	-0.637514	6.56583	2.02633e-10	6.11246e-08	41.2719	41.681	41.4761	61.5139	72.1994	59.804
chr11:85830134:85830383	chr11	85830134	85830383	.	250	-2.02208	1.8966	8.03783e-06	0.000278285	6.41967	5.71029	3.60336	15.7487	29.5063	19.7504
chr11:85862235:85863674	chr11	85862235	85863674	.	1440	-0.829525	5.89918	2.53426e-12	1.83153e-09	27.1944	31.2282	30.6536	50.879	51.5755	55.7194
chr11:86197820:86198160	chr11	86197820	86198160	.	341	-2.01033	3.92077	2.59689e-16	7.50717e-13	16.9434	15.1758	19.549	61.7458	68.338	78.6044
chr11:86302780:86304613	chr11	86302780	86304613	.	1834	-0.602145	6.43535	2.32057e-09	4.16504e-07	37.0164	39.698	35.2673	56.376	56.0355	57.595
chr11:88135366:88136505	chr11	88135366	88136505	.	1140	-0.664321	5.5857	5.70116e-08	5.66685e-06	29.9866	35.2197	31.9245	50.003	49.8536	53.9856
chr11:92400469:92401384	chr11	92400469	92401384	.	916	-1.11832	5.83542	5.22733e-17	2.2667e-13	35.7427	48.5079	33.0439	95.8692	79.2491	79.3157
chr11:93231177:93232484	chr11	93231177	93232484	.	1308	-1.02337	3.42786	3.10994e-05	0.000795309	4.53991	7.09421	4.13229	11.2551	10.1256	10.6507
chr11:94808073:94808539	chr11	94808073	94808539	.	467	-1.99558	1.98268	4.79082e-06	0.000185071	4.12399	3.43901	1.54319	13.9291	12.9237	10.1954
chr11:100676321:100676776	chr11	100676321	100676776	.	456	-1.94566	2.44192	2.47912e-07	1.84551e-05	2.46369	3.52197	7.9021	16.1421	13.9708	23.203
chr11:100679465:100680182	chr11	100679465	100680182	.	718	-0.710921	4.52493	1.77159e-05	0.000506857	24.3644	24.1077	23.3365	39.5768	38.5267	39.542
chr11:100789730:100790444	chr11	100789730	100790444	.	715	-1.44158	2.07509	0.000272841	0.00416678	2.91803	3.74363	2.01587	9.09776	7.97214	6.6591
chr11:102575460:102575954	chr11	102575460	102575954	.	495	-1.03936	2.95102	0.000266585	0.00410742	10.6995	6.84947	11.6472	15.562	25.7401	18.8811
chr11:105728403:105728930	chr11	105728403	105728930	.	528	-1.00712	2.94998	0.000383375	0.00540621	8.51093	7.43527	11.943	17.5072	14.9233	23.7128
chr11:108910190:108910737	chr11	108910190	108910737	.	548	-0.903113	4.60015	6.80674e-08	6.54088e-06	28.4082	29.9582	32.8774	56.8523	53.2317	60.4971
chr11:112003467:112003788	chr11	112003467	112003788	.	322	-1.61629	3.31581	4.58484e-09	7.32941e-07	14.4542	19.9506	9.51197	39.3399	41.1314	54.7648
chr11:113050053:113050420	chr11	113050053	113050420	.	368	-0.99359	3.77069	7.52322e-06	0.00026493	20.9337	19.3964	32.3127	45.5864	42.3679	56.5447
chr11:113576737:113577541	chr11	113576737	113577541	.	805	-1.04903	3.07002	0.00010961	0.00208804	6.3798	6.20684	6.93815	11.6956	16.036	12.7054
chr11:116766803:116767634	chr11	116766803	116767634	.	832	-0.857177	4.41211	1.22958e-06	6.36154e-05	18.5183	15.0135	20.139	30.2448	35.2628	31.7926
chr11:117470833:117471658	chr11	117470833	117471658	.	826	-1.02273	3.34405	4.27099e-05	0.00101065	6.6062	9.28959	7.63424	14.5069	18.2669	14.9443
chr11:117488885:117489482	chr11	117488885	117489482	.	598	-1.0352	2.70612	0.000759215	0.0090674	4.83086	7.75855	7.83339	11.7365	12.0551	17.9881
chr11:117587245:117587829	chr11	117587245	117587829	.	585	-1.23048	2.52088	0.000203429	0.0033469	6.03559	5.49066	4.92767	12.5826	9.74372	16.5792
chr11:118869321:118870267	chr11	118869321	118870267	.	947	-0.721467	4.02933	0.000222419	0.00357936	13.5579	13.7557	10.8443	17.8954	23.7223	21.4144
chr11:119188886:119190008	chr11	119188886	119190008	.	1123	-1.04128	5.5482	7.62312e-15	1.39182e-11	27.2965	27.49	26.3113	55.7903	53.2955	57.9434
chr11:119454914:119455275	chr11	119454914	119455275	.	362	-1.69502	2.66299	2.64319e-07	1.93853e-05	8.86695	7.3942	6.96782	24.1167	25.9347	25.8181
chr11:119461137:119462220	chr11	119461137	119462220	.	1084	-0.929735	5.76885	1.45213e-13	1.52649e-10	32.128	33.0883	38.0613	69.4833	57.3782	69.7888
chr11:120512179:120512495	chr11	120512179	120512495	.	317	-1.25327	2.63089	0.000106517	0.00204204	11.6445	11.2585	9.66201	37.2603	17.4525	23.364
chr11:122124273:122125028	chr11	122124273	122125028	.	756	-1.11731	3.26807	2.14514e-05	0.000590748	4.6704	10.1497	8.57943	15.1709	16.1884	19.1271
chr11:125952180:125952908	chr11	125952180	125952908	.	729	-1.08821	5.02779	6.14794e-12	3.84274e-09	36.1052	23.7439	24.7144	63.4006	52.4335	65.0702
chr11:126531647:126532309	chr11	126531647	126532309	.	663	-0.670138	5.50502	1.32384e-07	1.10262e-05	51.0766	46.8321	59.5125	94.4984	75.6066	80.325
chr11:128402169:128403204	chr11	128402169	128403204	.	1036	-1.06989	3.90271	4.52672e-07	2.95809e-05	9.91455	7.75106	9.5649	16.0276	20.8753	20.4258
chr11:130253369:130254194	chr11	130253369	130254194	.	826	-0.754507	4.14058	6.95414e-05	0.00147367	16.7098	16.6349	13.3054	24.4545	23.7469	30.7426
chr11:130347773:130349170	chr11	130347773	130349170	.	1398	-0.758098	5.63224	1.02592e-09	2.19009e-07	22.8454	27.5711	28.2237	41.5097	44.6106	46.6715
chr11:133765760:133766434	chr11	133765760	133766434	.	675	-1.12205	4.21869	1.04519e-08	1.4388e-06	13.5526	20.6205	17.0826	33.7291	35.7652	41.7998
chr11:133884506:133884776	chr11	133884506	133884776	.	271	-1.635	1.97591	0.000114859	0.00216605	3.55332	9.87712	5.98344	25.2667	16.0844	18.8706
chr11:133896377:133897206	chr11	133896377	133897206	.	830	-1.3165	3.34546	3.31995e-07	2.29192e-05	8.31464	6.23488	5.64382	16.9119	16.9669	16.7844
chr12:1937854:1938627	chr12	1937854	1938627	.	774	-0.826861	4.58232	1.1756e-06	6.16502e-05	22.1869	27.4356	16.2943	42.2425	38.3384	36.4533
chr12:3287819:3288779	chr12	3287819	3288779	.	961	-0.705686	4.22472	0.000162587	0.00282335	16.1995	13.5553	13.686	28.3224	16.9219	25.8734
chr12:3366291:3367387	chr12	3366291	3367387	.	1097	-0.772788	5.16672	4.19047e-08	4.45912e-06	23.1155	23.0988	25.621	36.8267	38.0535	47.9035
chr12:12673843:12674762	chr12	12673843	12674762	.	920	-0.6132	5.25908	3.90412e-06	0.000158774	31.2261	33.7497	32.9002	53.7733	52.4815	43.319
chr12:13318203:13319156	chr12	13318203	13319156	.	954	-0.66445	4.69226	3.53314e-05	0.000869869	17.8324	26.3742	17.9413	31.5807	36.0253	30.6844
chr12:31506603:31507275	chr12	31506603	31507275	.	673	-0.880388	4.59125	1.38258e-07	1.13653e-05	22.4164	27.0454	25.1646	44.2579	46.5831	46.3784
chr12:32393443:32394452	chr12	32393443	32394452	.	1010	-0.78286	3.80544	0.000229402	0.00365884	9.69307	8.48063	11.595	15.9318	20.7487	14.4915
chr12:39999160:40000292	chr12	39999160	40000292	.	1133	-0.651498	4.41667	0.000158435	0.0027664	14.4485	13.2299	15.5838	23.7207	18.6441	25.681
chr12:44516535:44517036	chr12	44516535	44517036	.	502	-1.4635	2.16289	0.000140571	0.00252992	3.83646	4.9766	4.3068	9.20698	11.6887	15.4563
chr12:44976688:44977241	chr12	44976688	44977241	.	554	-1.94255	1.76725	7.9692e-05	0.0016431	4.63514	1.28842	0.650426	14.2136	6.65756	5.41124
chr12:48994358:48995482	chr12	48994358	48995482	.	1125	-0.874537	5.26723	1.04747e-09	2.21565e-07	19.1164	29.979	22.9014	38.3447	48.432	44.8302
chr12:57370319:57370861	chr12	57370319	57370861	.	543	-0.936956	3.18537	0.000441448	0.0060015	15.3694	7.55851	9.95403	28.0574	16.9811	18.5111
chr12:57940760:57941509	chr12	57940760	57941509	.	750	-0.702013	3.96698	0.000398283	0.00555435	14.5513	14.9895	17.0559	29.215	22.8003	23.7475
chr12:58247572:58247894	chr12	58247572	58247894	.	323	-1.41815	2.21838	0.000397022	0.00554345	0.993757	8.28699	12.8293	18.5491	25.9519	13.6488
chr12:90567824:90568648	chr12	90567824	90568648	.	825	-0.748621	4.68531	2.9006e-06	0.000125875	19.4536	25.7396	23.804	37.7637	39.2198	38.6885
chr12:93443680:93444740	chr12	93443680	93444740	.	1061	-0.805819	3.63817	0.000314094	0.0046415	8.31956	7.23205	9.33953	17.102	12.0088	14.4598
chr12:96018323:96018661	chr12	96018323	96018661	.	339	-1.90581	1.91905	1.77616e-05	0.000507956	5.2077	4.73752	2.65734	10.6042	20.7707	16.6459
chr12:97858048:97859476	chr12	97858048	97859476	.	1429	-0.673711	5.859	5.56519e-09	8.6674e-07	32.5701	31.7183	28.9983	46.1196	55.1401	47.6335
chr12:97989784:97990136	chr12	97989784	97990136	.	353	-1.07697	2.58592	0.000822048	0.00958468	8.63837	13.6489	8.67664	23.7617	15.1977	26.4764
chr12:103493964:103494663	chr12	103493964	103494663	.	700	-1.11884	2.657	0.00057743	0.007382	4.35621	9.17725	2.57383	13.9391	12.6935	8.3133
chr12:104907259:104908207	chr12	104907259	104908207	.	949	-0.668032	6.48149	1.0437e-10	3.60257e-08	71.7055	71.2658	74.4213	127.529	118.538	99.2276
chr12:106100120:106101048	chr12	106100120	106101048	.	929	-0.65093	4.70364	5.03658e-05	0.00114909	27.4685	19.5926	17.2604	30.7721	32.8441	37.964
chr12:106306469:106307580	chr12	106306469	106307580	.	1112	-0.933894	4.86734	2.17952e-09	4.0004e-07	19.1955	16.6892	17.4983	37.4075	32.4142	32.3506
chr12:106329796:106330401	chr12	106329796	106330401	.	606	-0.78209	3.56754	0.000616015	0.00773839	13.7716	14.1344	13.9734	19.7735	22.4086	29.9724
chr12:106477458:106478481	chr12	106477458	106478481	.	1024	-0.612961	5.6174	4.66886e-07	3.01046e-05	34.0105	35.3756	43.6344	54.8316	55.5011	62.3399
chr12:106502155:106503083	chr12	106502155	106503083	.	929	-0.712324	4.76456	5.2015e-06	0.000198286	20.9037	18.8243	25.9876	37.2214	33.0246	37.3945
chr12:106541725:106542055	chr12	106541725	106542055	.	331	-1.50993	1.93059	0.000360528	0.00515844	4.36383	6.46936	5.44314	14.4806	20.7662	11.1879
chr12:106829834:106830306	chr12	106829834	106830306	.	473	-1.17366	2.87108	6.35835e-05	0.00137428	7.12543	12.0725	7.999	21.3525	21.6207	18.2681
chr12:107161623:107163200	chr12	107161623	107163200	.	1578	-0.67718	5.92461	4.67619e-09	7.45825e-07	25.6299	33.8121	29.0004	44.2599	45.3652	51.6289
chr12:107287069:107287535	chr12	107287069	107287535	.	467	-1.05558	3.08274	0.000101207	0.00196805	14.0903	8.40648	11.1882	24.5592	24.7705	21.146
chr12:109037244:109038363	chr12	109037244	109038363	.	1120	-0.647828	5.1997	1.97342e-06	9.32036e-05	23.0707	28.3603	24.6122	35.9176	43.7086	39.3622
chr12:109900393:109901676	chr12	109900393	109901676	.	1284	-0.914424	4.52088	1.25222e-07	1.05308e-05	13.4993	11.1182	11.927	26.2638	22.8494	19.9141
chr12:111369160:111369607	chr12	111369160	111369607	.	448	-1.10244	3.14102	5.5327e-05	0.00123666	8.95602	9.16132	18.0972	22.1619	25.821	29.5217
chr12:114204469:114205562	chr12	114204469	114205562	.	1094	-0.65887	4.92374	6.22495e-06	0.000227936	20.3916	20.8786	22.5622	33.1723	33.5605	34.0113
chr12:115874767:115875235	chr12	115874767	115875235	.	469	-1.62982	2.41566	5.00557e-06	0.000192616	4.1064	4.5658	6.91476	17.5197	16.4432	14.2879
chr12:117562529:117563535	chr12	117562529	117563535	.	1007	-0.668822	3.98826	0.000620213	0.00777283	10.997	13.4677	11.2717	18.1891	18.8127	19.7882
chr12:120799350:120800008	chr12	120799350	120800008	.	659	-0.864571	3.38605	0.000373551	0.00529999	13.1511	10.8314	8.47528	18.9625	18.8256	21.6749
chr12:120851578:120852321	chr12	120851578	120852321	.	744	-1.27306	2.70836	4.432e-05	0.00104199	5.60858	5.51649	3.39026	12.6546	10.1401	12.562
chr12:122020103:122021116	chr12	122020103	122021116	.	1014	-0.730465	4.52304	1.16757e-05	0.000368376	16.9355	15.8385	17.5904	29.8808	27.1149	26.6079
chr12:122267248:122267718	chr12	122267248	122267718	.	471	-2.2823	1.16005	0.000366954	0.00523145	2.04448	1.89434	0	8.35919	6.76293	4.86721
chr12:123394345:123394802	chr12	123394345	123394802	.	458	-1.07271	3.38862	1.82656e-05	0.000520438	18.9226	12.0783	11.408	25.0418	32.2121	32.7274
chr12:124906666:124908403	chr12	124906666	124908403	.	1738	-0.67567	5.73418	1.29809e-08	1.69927e-06	23.9168	20.8427	25.5013	35.5561	36.3658	40.3823
chr12:125139713:125140877	chr12	125139713	125140877	.	1165	-0.741129	4.96879	4.31409e-07	2.83977e-05	20.2509	17.6149	21.8057	32.3261	32.5225	34.9658
chr12:125231749:125232540	chr12	125231749	125232540	.	792	-0.789036	3.91766	0.000173701	0.0029654	10.3347	10.5896	20.2461	24.2075	24.5547	22.0428
chr12:125239636:125240405	chr12	125239636	125240405	.	770	-1.13539	2.49291	0.000676904	0.00831214	2.91803	4.86673	5.14766	12.2273	7.62043	8.47361
chr12:130951076:130951758	chr12	130951076	130951758	.	683	-2.09297	2.94348	2.71864e-10	7.60562e-08	2.81977	2.09015	7.3861	18.2961	16.6913	17.2986
chr12:130967062:130967648	chr12	130967062	130967648	.	587	-1.64189	2.1798	3.10912e-05	0.000795309	2.7341	5.77595	1.84158	10.79	11.9954	9.61323
chr12:131006033:131006821	chr12	131006033	131006821	.	789	-1.01273	2.91331	0.000713223	0.00863585	7.11941	9.04672	1.8268	11.9328	11.8991	12.7396
chr12:131117983:131119032	chr12	131117983	131119032	.	1050	-0.931089	4.1934	1.4352e-06	7.19988e-05	15.4378	10.7068	8.9226	21.0309	23.7902	22.5047
chr12:132277831:132278724	chr12	132277831	132278724	.	894	-0.680365	4.25418	0.0001796	0.00304736	15.4388	16.9664	15.9209	27.7644	28.8792	20.7114
chr13:21567666:21568515	chr13	21567666	21568515	.	850	-0.932897	4.36667	2.21183e-07	1.6639e-05	15.6716	15.7453	17.8048	28.7988	31.3603	33.8163
chr13:24192358:24193033	chr13	24192358	24193033	.	676	-0.649636	5.62065	2.82993e-07	2.04948e-05	49.8569	49.0992	70.0949	99.5183	91.5127	73.5631
chr13:25204716:25205540	chr13	25204716	25205540	.	825	-0.726439	4.31944	5.77846e-05	0.00127637	15.5628	15.7898	22.4937	32.9914	25.8078	30.1386
chr13:30808429:30809499	chr13	30808429	30809499	.	1071	-0.650004	4.93635	8.29878e-06	0.000285034	23.0773	20.3272	22.542	31.647	34.4378	37.5408
chr13:31331224:31332104	chr13	31331224	31332104	.	881	-0.662652	4.60136	4.99708e-05	0.00114196	21.1317	21.4703	20.4504	27.3968	33.3015	39.2318
chr13:31848548:31848960	chr13	31848548	31848960	.	413	-0.865096	4.11248	9.57378e-06	0.000315999	24.0932	32.8376	30.5369	60.1001	56.4244	42.271
chr13:33403633:33404550	chr13	33403633	33404550	.	918	-0.874724	4.3331	1.43251e-06	7.19766e-05	15.5597	14.1902	15.8972	23.1226	30.1331	30.543
chr13:36872755:36873229	chr13	36872755	36873229	.	475	-0.611963	4.39869	0.000359279	0.00514379	33.4499	33.8109	36.4129	53.3366	59.2949	45.6635
chr13:39984307:39984991	chr13	39984307	39984991	.	685	-0.986551	3.08482	0.000243279	0.0038239	8.9032	8.8572	6.04944	16.4934	14.1951	16.7333
chr13:40976235:40977226	chr13	40976235	40977226	.	992	-0.699549	5.15629	4.55131e-07	2.96497e-05	29.6069	27.8823	23.7923	43.4856	47.8274	40.8859
chr13:44902593:44903354	chr13	44902593	44903354	.	762	-0.667392	4.32193	0.000191667	0.00319968	20.0088	23.4182	16.3144	28.081	29.7017	37.2588
chr13:45272048:45272750	chr13	45272048	45272750	.	703	-0.808644	4.2074	1.44203e-05	0.000433296	18.9485	19.0377	18.1962	35.7947	35.5331	27.0911
chr13:45337836:45338405	chr13	45337836	45338405	.	570	-1.03992	3.49789	2.20449e-05	0.000602394	10.4179	14.0879	13.2755	34.5366	25.5886	17.3249
chr13:46407683:46408601	chr13	46407683	46408601	.	919	-1.16148	4.08773	1.14812e-08	1.54541e-06	8.90651	12.6214	12.155	23.6562	24.8099	26.6721
chr13:48725987:48726249	chr13	48725987	48726249	.	263	-2.39285	0.877497	0.000676801	0.00831214	0.610235	2.71402	2.05515	9.76321	7.6494	11.3986
chr13:50501721:50502638	chr13	50501721	50502638	.	918	-0.758481	3.80641	0.000379357	0.00536372	10.8393	8.94177	13.3458	23.309	17.3493	15.3676
chr13:51898923:51899681	chr13	51898923	51899681	.	759	-0.815531	3.58903	0.000319098	0.00469944	10.784	11.5203	11.1566	20.0727	22.7508	16.0312
chr13:54784485:54785140	chr13	54784485	54785140	.	656	-0.850347	3.29122	0.000688458	0.00841085	10.0307	11.4249	9.33797	15.3959	16.8672	23.3869
chr13:59983569:59984391	chr13	59983569	59984391	.	823	-0.659491	4.40655	0.000127147	0.00233928	19.3058	21.6825	17.9511	29.7436	28.5187	34.9257
chr13:64023688:64024126	chr13	64023688	64024126	.	439	-1.26456	2.2763	0.000524465	0.00684412	7.67728	3.25187	6.97689	16.3773	11.4567	15.666
chr13:67136888:67137830	chr13	67136888	67137830	.	943	-1.07839	4.20625	4.61636e-08	4.7995e-06	8.85003	13.6248	14.7115	22.5096	26.1341	29.5463
chr13:68315331:68315665	chr13	68315331	68315665	.	335	-0.925803	4.13647	2.95923e-06	0.000128	39.7636	22.9051	43.563	60.2968	72.5647	69.4843
chr13:68828211:68829078	chr13	68828211	68829078	.	868	-0.690305	5.07779	8.88247e-07	4.91936e-05	27.9197	31.6599	28.8518	49.3035	45.1958	48.1489
chr13:78603971:78604887	chr13	78603971	78604887	.	917	-0.951878	3.1333	0.000323167	0.00473923	7.17575	5.05955	6.48369	11.7606	10.421	14.2305
chr13:85439837:85440467	chr13	85439837	85440467	.	631	-0.779217	4.45277	7.78924e-06	0.000271567	30.0127	25.1692	19.9869	47.4751	38.5248	43.5966
chr13:91794759:91795483	chr13	91794759	91795483	.	725	-0.900938	4.34677	6.22782e-07	3.77368e-05	17.9308	19.1984	20.6261	40.1391	31.9112	35.755
chr13:97125537:97126432	chr13	97125537	97126432	.	896	-0.859615	3.28429	0.000544292	0.00705059	7.70217	6.97057	7.64105	13.5646	14.7816	12.2023
chr13:97503363:97504359	chr13	97503363	97504359	.	997	-1.2272	2.4529	0.000350371	0.00504016	2.41462	4.47459	2.34923	7.03956	9.24846	5.3062
chr13:97980506:97980921	chr13	97980506	97980921	.	416	-1.47394	2.3846	5.58528e-05	0.00124582	8.48755	4.71854	5.19715	19.3402	8.46307	24.1623
chr13:98918029:98918943	chr13	98918029	98918943	.	915	-0.706372	4.77861	5.22943e-06	0.000199132	25.4331	18.9173	23.0379	38.3522	37.9272	33.9195
chr13:100750802:100753008	chr13	100750802	100753008	.	2207	-0.940702	4.07523	1.91215e-06	9.09912e-05	5.74484	5.25556	4.32664	10.2383	10.6348	8.62937
chr13:101106975:101107720	chr13	101106975	101107720	.	746	-1.04878	2.89238	0.000249888	0.00390316	6.02382	6.21932	6.27931	15.3742	12.3602	10.6373
chr13:101282407:101283392	chr13	101282407	101283392	.	986	-1.30245	3.19857	1.5064e-06	7.50282e-05	3.90649	5.06745	6.57814	13.0209	14.2825	10.9096
chr13:110200758:110201103	chr13	110200758	110201103	.	346	-0.968681	3.06452	0.000500157	0.00660717	23.6563	11.8621	10.9351	27.2109	39.7319	24.9734
chr13:111118591:111119160	chr13	111118591	111119160	.	570	-0.665741	5.10501	1.8875e-06	8.99272e-05	43.0794	42.8898	52.7861	76.8816	69.1186	73.9402
chr13:111280644:111281748	chr13	111280644	111281748	.	1105	-1.05511	3.52662	8.40713e-06	0.000286627	6.24538	7.42855	6.03277	15.3366	13.6547	11.969
chr13:111596092:111597187	chr13	111596092	111597187	.	1096	-0.628382	5.49922	6.0198e-07	3.66685e-05	30.4583	35.0055	31.0691	45.1382	46.5013	57.601
chr13:114896148:114897075	chr13	114896148	114897075	.	928	-0.706864	3.90042	0.000498751	0.00659392	13.1437	12.3067	10.2898	16.7861	19.5109	22.2329
chr14:33681168:33681813	chr14	33681168	33681813	.	646	-0.836025	4.16764	1.22696e-05	0.000382936	24.3471	14.9166	19.2439	37.3632	32.6994	34.941
chr14:35024234:35025526	chr14	35024234	35025526	.	1293	-0.804582	4.4887	2.47326e-06	0.000110706	13.033	13.1109	11.1473	22.6389	19.5785	23.0487
chr14:49193102:49193610	chr14	49193102	49193610	.	509	-1.69022	2.60283	6.47287e-07	3.88149e-05	5.99085	6.66107	3.18568	14.4613	19.1035	18.0154
chr14:51293110:51293929	chr14	51293110	51293929	.	820	-0.946311	3.36596	0.000142946	0.00256314	7.63315	6.31092	10.9859	15.2393	14.1071	18.7095
chr14:55029015:55029512	chr14	55029015	55029512	.	498	-0.609916	4.34604	0.000425435	0.00583677	31.5827	31.8911	31.8369	51.217	45.1105	49.2202
chr14:56023691:56024630	chr14	56023691	56024630	.	940	-0.753611	4.56574	6.89391e-06	0.000247194	18.781	17.8447	18.7835	32.7795	24.7907	36.0189
chr14:56424521:56425104	chr14	56424521	56425104	.	584	-0.832111	4.89425	8.68561e-08	7.90823e-06	30.7793	31.7782	46.276	67.4174	66.6004	59.1835
chr14:56490095:56490845	chr14	56490095	56490845	.	751	-0.713837	4.067	0.00038649	0.0054413	13.2497	12.831	23.7505	30.7717	29.9135	20.6633
chr14:56677377:56678163	chr14	56677377	56678163	.	787	-1.88223	1.41448	0.000529468	0.00689779	1.4275	0.680228	1.60251	4.13272	5.53861	4.25732
chr14:56966733:56967516	chr14	56966733	56967516	.	784	-1.82537	4.96198	6.08599e-23	2.11123e-18	15.3532	16.8432	19.7633	59.1712	57.7364	67.0282
chr14:57115040:57115899	chr14	57115040	57115899	.	860	-0.641688	5.19626	2.96557e-06	0.000128114	27.8061	31.3319	40.0141	52.3497	50.0999	51.8776
chr14:57363440:57364205	chr14	57363440	57364205	.	766	-1.90846	3.78902	4.0552e-14	5.51666e-11	5.86654	10.4832	5.88016	27.7109	28.89	26.7046
chr14:58441265:58442343	chr14	58441265	58442343	.	1079	-0.65562	5.45467	2.42032e-07	1.80561e-05	28.7071	33.9032	31.3916	47.9118	45.9909	54.0959
chr14:58524951:58525674	chr14	58524951	58525674	.	724	-2.59065	1.86554	1.07147e-07	9.33436e-06	0.886695	1.72531	1.24425	8.51179	6.9468	8.03772
chr14:64243507:64244185	chr14	64243507	64244185	.	679	-0.875425	3.79408	4.61228e-05	0.0010731	15.1274	12.0892	14.8592	20.4208	28.3942	28.568
chr14:64830199:64830614	chr14	64830199	64830614	.	416	-1.21992	2.60929	0.000135034	0.00245432	8.87335	9.43708	6.49644	20.9862	20.9562	16.1082
chr14:68744662:68746104	chr14	68744662	68746104	.	1443	-0.62859	5.50088	4.0325e-07	2.68756e-05	25.2472	23.9907	24.0973	38.1985	34.8543	40.4501
chr14:69259629:69260543	chr14	69259629	69260543	.	915	-0.612905	4.72082	0.000111158	0.00210945	18.0663	28.0834	21.4626	34.0492	30.7815	38.3521
chr14:69405212:69405664	chr14	69405212	69405664	.	453	-0.62589	4.31158	0.00050791	0.00667908	24.4458	40.9679	36.5904	52.148	56.9934	47.4919
chr14:77050555:77050980	chr14	77050555	77050980	.	426	-0.8728	3.34859	0.00049125	0.00651059	11.679	17.1744	20.3006	29.3339	37.3866	22.7673
chr14:77494621:77495649	chr14	77494621	77495649	.	1029	-0.650518	4.01084	0.000803829	0.00943171	13.7252	10.0582	11.9061	18.632	19.0622	18.5083
chr14:84841325:84842219	chr14	84841325	84842219	.	895	-0.949645	3.7266	1.83467e-05	0.00052232	7.53146	9.57032	12.4809	19.3177	19.8557	17.7328
chr14:89865979:89866545	chr14	89865979	89866545	.	567	-1.23129	2.51695	0.000230758	0.00367463	7.64247	5.97969	3.17757	15.0954	13.6012	11.1964
chr14:93427426:93428245	chr14	93427426	93428245	.	820	-0.698496	4.39668	7.13601e-05	0.00150257	14.4834	22.6323	20.8731	33.61	31.0765	29.032
chr14:93502190:93503846	chr14	93502190	93503846	.	1657	-0.879751	6.74955	1.50331e-16	5.21498e-13	40.3893	41.7847	54.6919	79.7539	88.2259	83.542
chr14:93528006:93528450	chr14	93528006	93528450	.	445	-1.20108	2.38422	0.000539625	0.00700321	5.04918	8.82208	6.07308	13.079	18.837	13.8697
chr14:95714836:95715149	chr14	95714836	95715149	.	314	-1.06319	3.8128	8.41074e-07	4.76972e-05	27.6005	27.2785	29.8367	56.1519	59.7985	61.2145
chr14:95715221:95716067	chr14	95715221	95716067	.	847	-0.726212	5.5548	7.15089e-09	1.04448e-06	36.1912	43.1896	45.3079	66.0878	69.8704	69.9541
chr14:95981316:95982011	chr14	95981316	95982011	.	696	-1.06009	2.69744	0.000514012	0.00672998	5.30361	6.66611	5.17724	10.8218	11.0803	13.9351
chr14:99857746:99858601	chr14	99857746	99858601	.	856	-1.01947	4.37493	2.1936e-08	2.6607e-06	15.1867	16.4688	15.5753	34.1963	33.2949	28.2231
chr14:99997225:99998153	chr14	99997225	99998153	.	929	-1.16706	5.08003	1.04142e-13	1.18449e-10	18.3123	25.1631	23.2725	47.3559	45.6569	56.5663
chr14:100000949:100002036	chr14	100000949	100002036	.	1088	-0.894171	5.14797	1.11922e-09	2.33891e-07	18.7339	21.4858	27.6545	37.1313	42.991	45.7065
chr14:100004482:100004901	chr14	100004482	100004901	.	420	-0.666483	4.02229	0.000582842	0.00742798	25.6023	28.8914	33.4598	43.203	48.6982	47.4446
chr14:100545189:100545992	chr14	100545189	100545992	.	804	-1.01761	2.95499	0.000325679	0.00476902	5.78888	7.3243	5.15406	11.0714	9.8004	16.2306
chr14:101308642:101309704	chr14	101308642	101309704	.	1063	-0.652479	4.71514	2.97003e-05	0.000767935	18.4196	16.9549	21.5252	31.08	30.4387	27.8698
chr14:103893854:103894484	chr14	103893854	103894484	.	631	-0.854962	4.82516	3.79656e-08	4.11571e-06	33.5736	32.2392	28.8383	56.6988	54.2004	60.644
chr14:104038222:104038746	chr14	104038222	104038746	.	525	-1.80405	1.68216	0.000195357	0.00324333	3.05699	1.35959	2.74542	5.54302	11.1766	8.73316
chr14:105132054:105133161	chr14	105132054	105133161	.	1108	-0.861684	3.61294	0.00016029	0.00279	8.54604	8.5358	5.69123	11.1237	14.6769	15.7563
chr15:28346635:28347315	chr15	28346635	28347315	.	681	-1.02206	3.81428	3.15459e-06	0.000134521	12.2549	14.674	12.9636	21.6176	35.2039	24.082
chr15:33375331:33376441	chr15	33375331	33376441	.	1111	-0.64356	5.22516	1.8885e-06	8.99272e-05	28.747	21.844	27.4063	42.2176	39.5357	40.316
chr15:36654400:36654963	chr15	36654400	36654963	.	564	-1.38428	3.07182	1.31535e-06	6.70531e-05	5.40664	8.85905	9.5834	16.0862	25.8608	20.0105
chr15:39508988:39509536	chr15	39508988	39509536	.	549	-0.825031	3.99254	3.16879e-05	0.000805904	19.5864	19.1773	22.6441	37.7285	36.3393	34.6904
chr15:39872020:39873250	chr15	39872020	39873250	.	1231	-0.657804	4.78916	1.9889e-05	0.000556861	20.7296	15.3658	15.3677	27.2556	29.0084	25.2123
chr15:40572018:40572673	chr15	40572018	40572673	.	656	-1.58706	1.69442	0.000701222	0.00853822	2.93583	1.90416	1.64788	5.74085	8.17802	5.91393
chr15:41157914:41158656	chr15	41157914	41158656	.	743	-0.647151	4.45904	0.000260377	0.00403595	18.3604	29.7811	20.1264	26.2647	36.7791	43.6703
chr15:41210331:41211655	chr15	41210331	41211655	.	1325	-1.09521	3.95053	3.95951e-07	2.64654e-05	4.36053	8.0806	9.51831	15.8908	16.9547	13.7082
chr15:42383855:42384455	chr15	42383855	42384455	.	601	-1.45626	2.01513	0.000343754	0.00496558	2.67041	2.96916	4.19692	8.82967	11.437	6.74856
chr15:57823067:57823622	chr15	57823067	57823622	.	556	-1.47135	3.00875	4.15156e-07	2.75896e-05	8.65963	8.02368	5.18469	22.7832	19.2978	19.0298
chr15:61342171:61342499	chr15	61342171	61342499	.	329	-1.62919	2.30313	1.54896e-05	0.000458673	8.78071	7.05108	4.38098	18.2108	14.7776	30.5518
chr15:62933974:62934787	chr15	62933974	62934787	.	814	-0.858645	3.98236	1.72172e-05	0.000497306	13.8015	13.1533	13.5015	23.7635	22.6553	27.0797
chr15:63071133:63072076	chr15	63071133	63072076	.	944	-0.760061	5.28324	4.64114e-08	4.81319e-06	34.5125	34.4039	21.9484	51.1369	53.1008	50.0634
chr15:63270496:63270922	chr15	63270496	63270922	.	427	-1.04909	3.24259	4.53366e-05	0.00105901	12.7792	16.2984	12.6582	26.459	31.0171	28.9086
chr15:63292033:63292987	chr15	63292033	63292987	.	955	-0.815886	4.51737	1.99686e-06	9.40544e-05	17.4776	14.5747	19.2431	31.5476	25.1035	33.7913
chr15:65660584:65660917	chr15	65660584	65660917	.	334	-1.27762	2.67602	7.59284e-05	0.00157779	8.64926	15.4939	7.55195	18.9632	36.14	21.6469
chr15:67138148:67138685	chr15	67138148	67138685	.	538	-1.01343	2.7747	0.000771365	0.00916392	10.1426	4.31191	9.37677	14.6363	17.7621	16.061
chr15:67436907:67437462	chr15	67436907	67437462	.	556	-0.708633	4.0628	0.000233355	0.00370175	23.0923	18.9359	24.9513	40.6402	34.6757	34.2536
chr15:69760435:69761416	chr15	69760435	69761416	.	982	-0.770505	5.02013	1.61491e-07	1.28342e-05	20.7561	27.2576	24.585	35.5611	43.8757	44.1755
chr15:70086208:70086853	chr15	70086208	70086853	.	646	-1.15075	3.76068	2.75106e-07	2.00703e-05	10.6829	14.3641	13.1082	24.6438	28.0281	31.9382
chr15:70177503:70178313	chr15	70177503	70178313	.	811	-1.03403	4.75787	5.20737e-10	1.27214e-07	26.3199	19.5829	18.661	47.2807	38.4498	47.1842
chr15:70315239:70316100	chr15	70315239	70316100	.	862	-0.877383	5.47132	2.58927e-11	1.23892e-08	35.0029	37.6767	35.323	64.7392	70.9884	62.5996
chr15:75063891:75064461	chr15	75063891	75064461	.	571	-2.27558	1.04604	0.000507222	0.00667263	1.12429	1.56258	0.315531	5.99585	4.11049	4.9413
chr15:75212822:75213107	chr15	75212822	75213107	.	286	-1.06597	2.90565	0.000215007	0.00348777	14.029	16.2224	18.2688	24.54	35.7574	41.3111
chr15:78342169:78343527	chr15	78342169	78343527	.	1359	-0.720355	5.06617	6.43764e-07	3.86704e-05	14.4077	21.2718	19.7535	28.7192	32.3209	29.9744
chr15:84362728:84363179	chr15	84362728	84363179	.	452	-1.7565	1.65856	0.000293773	0.00441551	1.77535	3.55314	3.18881	6.81697	11.1272	10.9239
chr15:89932839:89933510	chr15	89932839	89933510	.	672	-1.47046	3.03834	3.70376e-07	2.51043e-05	4.29889	7.96637	6.43457	17.3219	15.7171	18.6314
chr15:89938640:89939565	chr15	89938640	89939565	.	926	-3.04372	2.04676	4.7584e-10	1.18916e-07	1.21322	0.770828	0.583698	5.17612	6.51769	10.2835
chr15:89942572:89943316	chr15	89942572	89943316	.	745	-2.10652	2.3991	3.38601e-08	3.74513e-06	2.36968	1.9162	3.14387	8.04209	13.0519	11.125
chr15:91382410:91383163	chr15	91382410	91383163	.	754	-1.01064	3.2681	7.62876e-05	0.00158421	8.3013	8.52	7.64639	20.4328	14.0078	14.9681
chr15:92170444:92171875	chr15	92170444	92171875	.	1432	-0.648216	5.34752	8.52373e-07	4.80403e-05	22.303	25.4212	18.1175	34.1885	32.8977	36.2044
chr15:92176090:92176763	chr15	92176090	92176763	.	674	-1.14337	3.46174	3.21622e-06	0.000136515	12.3822	8.737	8.28666	19.3024	24.1276	21.9774
chr15:93001717:93002466	chr15	93001717	93002466	.	750	-1.90071	2.92686	1.46811e-09	2.91094e-07	3.63781	4.9965	3.60336	13.4663	14.7531	17.6343
chr15:93274100:93274424	chr15	93274100	93274424	.	325	-1.2823	2.7517	5.71663e-05	0.00126756	5.43203	12.0795	17.1853	22.6486	23.7288	37.4389
chr15:93346711:93348000	chr15	93346711	93348000	.	1290	-0.602577	8.04905	1.52383e-14	2.34941e-11	157.257	156.59	174.721	244.166	262.521	234.987
chr15:93543916:93544814	chr15	93543916	93544814	.	899	-0.634364	4.63691	7.27781e-05	0.00152502	18.3878	23.4224	22.4458	33.8936	30.7699	34.9155
chr15:95830549:95831281	chr15	95830549	95831281	.	733	-1.01069	3.24066	8.41277e-05	0.00170866	8.97703	6.57307	9.09443	15.8804	18.7548	15.1563
chr15:99319799:99320497	chr15	99319799	99320497	.	699	-0.95702	3.82511	8.62507e-06	0.000292049	16.3017	11.9986	11.8565	21.5508	27.5818	29.2643
chr15:101631378:101632671	chr15	101631378	101632671	.	1294	-0.715388	4.18217	0.000103227	0.00199612	9.92221	10.8943	10.4425	16.933	17.8791	16.4895
chr16:710655:711026	chr16	710655	711026	.	372	-2.61357	0.708446	0.000773025	0.0091805	0.862859	0	1.93729	4.60166	8.56274	4.7404
chr16:1040659:1041543	chr16	1040659	1041543	.	885	-0.740756	5.4201	1.17285e-08	1.56485e-06	38.9895	37.1008	31.5548	61.3159	59.1035	59.7772
chr16:1052394:1053493	chr16	1052394	1053493	.	1100	-0.965323	5.25047	1.23441e-11	6.69086e-09	22.9066	25.1447	21.6202	45.7522	49.5328	40.7191
chr16:1069210:1069870	chr16	1069210	1069870	.	661	-0.865573	3.97202	2.27862e-05	0.000618751	12.6257	17.8177	19.0798	34.9614	25.363	29.6128
chr16:4992983:4994067	chr16	4992983	4994067	.	1085	-0.687983	6.01578	4.36898e-09	7.0493e-07	48.8132	53.4517	33.8749	70.6814	69.223	79.8012
chr16:8985347:8986175	chr16	8985347	8986175	.	829	-0.794362	4.39648	6.94514e-06	0.000248506	14.3262	20.6645	19.9945	32.4192	31.1436	31.4822
chr16:9221368:9222204	chr16	9221368	9222204	.	837	-1.07662	4.90443	4.40839e-11	1.76866e-08	20.3251	24.3046	23.678	39.2675	43.8652	60.8878
chr16:11266562:11267147	chr16	11266562	11267147	.	586	-0.691331	4.06244	0.000300982	0.00449272	19.4453	21.0116	23.6739	35.3464	32.6144	35.5093
chr16:11782247:11782897	chr16	11782247	11782897	.	651	-0.72824	4.14796	0.000184105	0.00310311	23.1739	11.7868	25.1848	34.7096	32.4483	32.7765
chr16:11783438:11784353	chr16	11783438	11784353	.	916	-0.815734	3.6962	0.000189114	0.00316544	10.6878	8.76648	10.4246	15.8848	16.8381	20.0214
chr16:12246559:12246996	chr16	12246559	12246996	.	438	-1.27243	2.29416	0.000441505	0.0060015	4.39704	7.33342	6.58148	18.3688	15.6932	10.0652
chr16:15603185:15604104	chr16	15603185	15604104	.	920	-0.68034	5.00848	2.77416e-06	0.000121663	23.376	25.7972	30.7461	42.9815	47.0147	37.7603
chr16:15775712:15776478	chr16	15775712	15776478	.	767	-0.887197	3.2469	0.000609505	0.00767551	10.6716	5.58373	8.69128	18.0778	17.0491	11.2657
chr16:19359646:19360760	chr16	19359646	19360760	.	1115	-0.805761	3.77662	0.000189577	0.0031709	6.62119	8.32217	11.311	17.0414	14.4344	14.2339
chr16:19566433:19567327	chr16	19566433	19567327	.	895	-0.61097	5.34616	5.94078e-06	0.000220413	40.5264	40.6739	25.5657	48.7724	60.6909	53.9865
chr16:20192484:20193339	chr16	20192484	20193339	.	856	-1.18927	4.47422	2.1863e-10	6.42736e-08	16.8741	10.8402	18.9429	32.3965	33.099	41.2016
chr16:20956335:20956786	chr16	20956335	20956786	.	452	-2.00468	3.0748	7.09097e-11	2.65931e-08	8.87676	7.50107	4.78322	29.5402	25.2216	31.2111
chr16:21522546:21523619	chr16	21522546	21523619	.	1074	-0.689909	5.79844	3.7886e-09	6.33381e-07	36.163	38.0487	44.1193	62.4797	63.8441	64.3635
chr16:21524504:21524862	chr16	21524504	21524862	.	359	-0.881261	3.31768	0.000419563	0.00577794	13.8586	19.8826	23.0856	30.0402	36.4252	37.8228
chr16:21532397:21533499	chr16	21532397	21533499	.	1103	-0.712374	5.03785	5.65729e-07	3.49824e-05	21.9712	22.4878	22.5414	36.1608	34.6546	39.0096
chr16:23093165:23094249	chr16	23093165	23094249	.	1085	-0.726946	5.08664	3.27439e-07	2.27133e-05	24.5545	24.5056	20.9227	36.6029	43.8824	35.4311
chr16:23336025:23336516	chr16	23336025	23336516	.	492	-1.61513	1.9092	0.000170823	0.00292996	3.58823	3.62696	2.92956	13.9172	8.51877	8.9605
chr16:24697229:24698311	chr16	24697229	24698311	.	1083	-0.726892	5.61525	6.0205e-09	9.2617e-07	31.8613	30.3178	39.4273	56.7444	50.6199	60.7348
chr16:25075099:25075599	chr16	25075099	25075599	.	501	-0.972112	3.22813	0.000252831	0.00394018	7.36789	13.8911	15.4635	16.4006	28.7781	26.3986
chr16:29625715:29626845	chr16	29625715	29626845	.	1131	-0.630846	4.98337	1.17125e-05	0.000369071	22.1368	23.6667	19.2753	31.3303	32.6108	36.9525
chr16:48177443:48178224	chr16	48177443	48178224	.	782	-1.08541	3.50182	5.6956e-06	0.000212795	8.41453	10.2687	8.29418	21.0146	18.4371	17.8147
chr16:49788726:49789140	chr16	49788726	49789140	.	415	-1.0424	3.45496	2.06011e-05	0.000574249	20.1098	16.3397	13.4583	43.311	29.4901	30.5944
chr16:50189298:50189830	chr16	50189298	50189830	.	533	-0.833377	3.88742	6.64476e-05	0.00142025	16.8622	21.0922	20.6196	40.1458	26.1068	38.0477
chr16:51389866:51390317	chr16	51389866	51390317	.	452	-0.945805	3.02084	0.000506236	0.00666461	10.6521	11.0542	13.5525	22.3445	24.8507	20.6774
chr16:51393113:51393861	chr16	51393113	51393861	.	749	-1.36191	4.07328	1.49236e-10	4.83833e-08	10.7137	16.2008	10.1029	34.0535	31.784	29.1943
chr16:51558727:51559578	chr16	51558727	51559578	.	852	-0.618583	6.46365	7.39228e-10	1.67607e-07	82.318	83.5683	78.242	121.555	127.114	126.255
chr16:51670537:51671275	chr16	51670537	51671275	.	739	-1.21101	2.75208	7.35903e-05	0.00153785	5.86371	4.34647	5.36359	9.26558	12.931	14.0788
chr16:51873635:51874454	chr16	51873635	51874454	.	820	-1.38373	4.13055	4.2968e-11	1.76398e-08	10.7647	15.0156	9.0084	31.94	30.4631	28.3869
chr16:51883135:51884323	chr16	51883135	51884323	.	1189	-0.788543	5.05745	1.80991e-07	1.39679e-05	18.8973	18.0097	24.0931	32.1055	27.9181	45.3834
chr16:52763367:52764146	chr16	52763367	52764146	.	780	-0.600185	5.30626	9.27775e-06	0.000308827	35.1847	32.4864	52.4335	61.2303	62.1162	58.3288
chr16:52889486:52889733	chr16	52889486	52889733	.	248	-0.853053	3.53869	0.000238279	0.00375946	37.5344	30.9403	28.3329	69.7151	57.4605	48.352
chr16:53949193:53950094	chr16	53949193	53950094	.	902	-0.823762	4.27798	8.55029e-06	0.000290083	15.124	16.6181	13.982	31.883	20.8168	28.3478
chr16:54177905:54178820	chr16	54177905	54178820	.	916	-1.20449	3.15074	1.14813e-05	0.000363398	7.00838	3.89621	5.9007	16.6323	9.88326	12.5134
chr16:56580948:56582012	chr16	56580948	56582012	.	1065	-0.609867	4.64802	0.000125095	0.00231196	15.5217	20.7769	18.9472	29.0928	27.7054	27.3207
chr16:68661833:68662465	chr16	68661833	68662465	.	633	-1.60492	3.2784	5.57172e-09	8.6674e-07	5.83146	8.17528	7.96952	27.0429	18.2746	21.4509
chr16:70725744:70726408	chr16	70725744	70726408	.	665	-0.880947	3.40261	0.000262772	0.004064	10.8603	9.66027	11.9209	22.1378	20.6726	16.9713
chr16:72075963:72077026	chr16	72075963	72077026	.	1064	-0.95659	4.34403	1.87128e-07	1.433e-05	12.9721	14.7587	10.4985	24.4545	22.3743	27.5121
chr16:72404554:72405672	chr16	72404554	72405672	.	1119	-0.651724	4.93296	1.19853e-05	0.000376091	20.5097	17.7011	24.7952	35.0318	35.957	27.8934
chr16:73070935:73071457	chr16	73070935	73071457	.	523	-0.813039	3.96036	6.93313e-05	0.00147206	22.0945	20.1307	21.0139	40.5861	44.2364	26.2997
chr16:75374448:75375432	chr16	75374448	75375432	.	985	-0.821257	4.5327	1.30707e-06	6.67782e-05	18.4118	15.5801	16.0962	25.1993	31.6576	31.867
chr16:77257792:77258530	chr16	77257792	77258530	.	739	-1.31896	2.78847	1.75966e-05	0.000504484	4.56066	6.76117	3.9008	10.4238	15.4265	12.1698
chr16:80971815:80973088	chr16	80971815	80973088	.	1274	-0.619085	5.63359	2.50967e-07	1.86226e-05	34.1392	29.2742	28.001	45.4155	47.2419	48.0306
chr16:81160454:81161270	chr16	81160454	81161270	.	817	-0.933664	4.37554	4.26303e-07	2.81417e-05	11.7864	18.347	21.6113	30.8001	34.4738	33.0238
chr16:82677654:82678317	chr16	82677654	82678317	.	664	-2.411	1.14175	0.00017679	0.00300999	1.20852	0.268745	1.08535	5.67168	5.04968	3.45249
chr16:84617561:84618009	chr16	84617561	84618009	.	449	-1.23323	2.94285	1.8025e-05	0.000514514	9.65096	8.34605	11.2354	25.9251	19.0426	23.9575
chr16:85602930:85604304	chr16	85602930	85604304	.	1375	-0.663209	4.40268	0.000129638	0.00237472	12.0223	11.161	11.9238	19.4213	15.1189	21.1611
chr16:85616845:85618027	chr16	85616845	85618027	.	1183	-0.786822	4.39873	7.3377e-06	0.000259079	13.9735	10.559	14.0114	22.284	21.2573	23.1049
chr16:85626194:85628510	chr16	85626194	85628510	.	2317	-0.810547	5.64558	1.10844e-10	3.80711e-08	17.8709	15.4803	13.2968	26.5232	27.2783	28.2361
chr16:86754175:86754768	chr16	86754175	86754768	.	594	-0.940526	4.50527	1.52468e-07	1.22292e-05	20.5343	26.4365	30.6346	47.8386	61.5279	38.8904
chr16:86801864:86802407	chr16	86801864	86802407	.	544	-1.25139	4.1721	6.74157e-10	1.55924e-07	15.6362	23.946	18.2155	51.2915	42.2205	43.7615
chr16:86860670:86861265	chr16	86860670	86861265	.	596	-0.938488	3.32431	0.000242568	0.00381445	10.2327	13.1739	9.97574	12.9248	24.4723	26.6289
chr16:87604744:87605740	chr16	87604744	87605740	.	997	-0.661707	4.74586	2.87602e-05	0.000747334	18.995	25.0577	17.7096	26.9564	35.1442	35.5515
chr16:87894014:87894762	chr16	87894014	87894762	.	749	-0.876172	5.50725	4.19274e-11	1.75236e-08	50.7831	38.3577	38.0061	74.7348	74.3119	85.2284
chr16:87903942:87904627	chr16	87903942	87904627	.	686	-0.622078	4.8927	2.44184e-05	0.000656137	37.1985	34.5968	29.1525	51.6539	49.8549	54.2395
chr17:273199:273537	chr17	273199	273537	.	339	-1.22552	2.7654	5.04887e-05	0.00115114	10.8888	12.107	11.1608	28.7827	23.738	27.5698
chr17:854572:855462	chr17	854572	855462	.	891	-0.610943	5.23431	6.39314e-06	0.000233082	27.9195	36.2501	35.3865	44.7647	56.8239	50.0726
chr17:3497536:3498253	chr17	3497536	3498253	.	718	-0.89941	3.23721	0.000415206	0.0057259	8.494	9.44425	8.53163	13.828	20.0806	15.473
chr17:5411961:5412587	chr17	5411961	5412587	.	627	-0.712459	3.86474	0.000511689	0.00670969	16.126	15.3686	20.1144	28.3938	30.4817	25.5936
chr17:5673267:5673826	chr17	5673267	5673826	.	560	-1.21474	3.44964	2.10302e-06	9.78414e-05	8.02459	13.7021	12.5474	34.8477	17.3637	27.0812
chr17:5800412:5800908	chr17	5800412	5800908	.	497	-1.20338	3.03118	1.55101e-05	0.000458887	8.07303	10.0533	10.5128	23.0768	23.2753	19.5148
chr17:5805850:5806528	chr17	5805850	5806528	.	679	-2.29933	2.85442	3.11366e-11	1.39372e-08	2.36365	4.46773	3.44946	23.4461	12.3453	14.8034
chr17:5824943:5825942	chr17	5824943	5825942	.	1000	-0.756803	4.49342	7.65015e-06	0.000267659	17.4936	17.4878	14.4134	26.8755	27.8298	28.9202
chr17:5847784:5848390	chr17	5847784	5848390	.	607	-1.44916	2.43726	3.31111e-05	0.000832939	4.23043	5.29166	3.85862	15.2287	12.7049	8.71546
chr17:6063284:6064161	chr17	6063284	6064161	.	878	-0.848334	3.99117	2.96062e-05	0.000765876	12.4299	15.6496	9.84973	23.0062	18.9035	26.5117
chr17:6090257:6091795	chr17	6090257	6091795	.	1539	-1.39688	5.4971	1.31413e-20	2.27937e-16	13.4525	16.0011	18.7309	43.3793	42.3753	40.7914
chr17:6093864:6094444	chr17	6093864	6094444	.	581	-1.88298	2.4617	2.21092e-07	1.6639e-05	3.31481	4.91419	3.101	17.0887	11.2536	13.6582
chr17:6160531:6161109	chr17	6160531	6161109	.	579	-0.682836	4.63963	2.10613e-05	0.000583667	28.8275	33.2854	35.7847	55.5823	48.3548	52.9942
chr17:8695006:8695709	chr17	8695006	8695709	.	704	-0.693138	4.07631	0.000427382	0.00585656	12.5384	21.2919	20.2177	23.8293	34.5301	28.5555
chr17:9390065:9391240	chr17	9390065	9391240	.	1176	-0.918624	3.68298	3.39253e-05	0.000848194	6.9601	6.82831	8.27302	14.1196	15.1113	12.446
chr17:15648067:15648803	chr17	15648067	15648803	.	737	-1.21792	2.73958	7.35571e-05	0.00153763	5.22633	3.63188	6.60046	11.3811	13.421	11.2457
chr17:17722889:17723843	chr17	17722889	17723843	.	955	-0.713558	4.17403	0.000145411	0.00259215	13.6124	16.817	11.6968	21.5097	26.859	20.681
chr17:19584564:19585317	chr17	19584564	19585317	.	754	-0.739904	4.31101	3.69246e-05	0.000899519	16.6026	19.88	21.7444	35.1898	28.9051	32.9766
chr17:19861118:19862002	chr17	19861118	19862002	.	885	-0.613424	5.93494	3.83895e-08	4.15517e-06	51.8651	58.8773	52.32	81.0453	85.8137	82.4925
chr17:27044446:27046040	chr17	27044446	27046040	.	1595	-0.663817	4.60844	3.90292e-05	0.000938595	12.4771	11.6354	10.844	18.3524	20.2861	16.8051
chr17:27365351:27366182	chr17	27365351	27366182	.	832	-0.631903	4.81373	3.37105e-05	0.000844039	24.4981	25.3085	28.8009	41.1494	34.4568	46.2052
chr17:28165961:28166327	chr17	28165961	28166327	.	367	-1.38908	2.00491	0.000683116	0.00836179	5.24769	4.37607	6.87289	20.9896	12.7907	9.60996
chr17:29421446:29422106	chr17	29421446	29422106	.	661	-0.680419	4.92192	4.15264e-06	0.000165867	30.593	34.2855	39.795	59.046	55.545	52.8228
chr17:30630238:30631226	chr17	30630238	30631226	.	989	-1.12177	4.54768	2.47656e-10	7.10016e-08	14.6049	14.7954	14.5737	33.4055	27.1222	35.3042
chr17:33067581:33068469	chr17	33067581	33068469	.	889	-1.88313	2.83134	5.51663e-09	8.63148e-07	3.24955	3.61309	2.83729	12.9012	9.24052	13.8853
chr17:33083360:33084601	chr17	33083360	33084601	.	1242	-0.820321	4.3672	4.29511e-06	0.000170477	11.7591	13.9366	9.71921	22.1902	20.6525	19.7356
chr17:33091816:33092231	chr17	33091816	33092231	.	416	-2.42528	2.015	8.77999e-08	7.94205e-06	3.85798	3.00271	1.29929	15.2253	13.2991	16.5321
chr17:39861444:39862372	chr17	39861444	39862372	.	929	-0.699429	4.02052	0.000484366	0.00643782	17.794	9.79631	11.2484	25.06	19.6704	18.7922
chr17:41188091:41188786	chr17	41188091	41188786	.	696	-0.73528	4.06271	0.000148377	0.00263015	19.8309	17.9472	15.014	26.8086	27.2189	34.2044
chr17:42022595:42023270	chr17	42022595	42023270	.	676	-1.37191	2.61466	2.39953e-05	0.000648032	5.93535	4.22359	3.99781	12.6614	14.3841	9.91276
chr17:42993466:42994760	chr17	42993466	42994760	.	1295	-0.888013	5.45457	2.38635e-11	1.16595e-08	24.5385	21.6341	24.4861	47.0584	43.7571	40.0346
chr17:46064682:46065254	chr17	46064682	46065254	.	573	-1.86732	2.41636	5.58816e-07	3.47407e-05	3.08099	2.17998	5.97416	17.0285	10.8255	13.2334
chr17:46902889:46903622	chr17	46902889	46903622	.	734	-1.817	3.58244	2.50503e-12	1.82947e-09	6.34096	6.80723	7.85473	23.3217	27.8654	22.8237
chr17:47515844:47516808	chr17	47515844	47516808	.	965	-0.951508	4.89142	2.14806e-09	3.95312e-07	19.7912	19.0466	23.3378	31.7529	41.3477	47.1466
chr17:48036446:48037121	chr17	48036446	48037121	.	676	-2.05574	1.68313	3.38988e-05	0.000848142	1.18707	2.63974	1.06608	7.09036	7.93607	5.4781
chr17:48970410:48971474	chr17	48970410	48971474	.	1065	-0.686062	7.06858	1.63033e-13	1.68824e-10	96.7472	87.6315	104.717	160.412	148.287	156.473
chr17:55678453:55679433	chr17	55678453	55679433	.	981	-0.936713	4.15806	1.00157e-06	5.42885e-05	13.088	11.278	12.3051	25.6511	22.0456	22.6495
chr17:55993767:55994295	chr17	55993767	55994295	.	529	-0.66473	4.4084	0.000109564	0.00208804	31.5523	27.3236	32.6959	53.3931	47.5376	44.3357
chr17:56109804:56110995	chr17	56109804	56110995	.	1192	-1.21483	4.22939	6.80936e-10	1.56955e-07	8.07845	8.83251	11.0338	21.5413	23.2065	19.9717
chr17:56301593:56302147	chr17	56301593	56302147	.	555	-0.90923	3.05789	0.000705356	0.00857374	8.38606	9.96729	11.6866	18.1977	17.8222	20.335
chr17:56708567:56709159	chr17	56708567	56709159	.	593	-0.975765	4.08908	1.06303e-06	5.67768e-05	17.5919	22.5691	16.7104	42.1459	40.4281	29.1426
chr17:56735980:56737097	chr17	56735980	56737097	.	1118	-0.643464	4.11167	0.000615673	0.0077361	12.3455	10.8536	12.2476	16.077	19.3442	20.0318
chr17:57244830:57245423	chr17	57244830	57245423	.	594	-0.872052	3.82312	5.5425e-05	0.00123845	13.7796	22.5311	13.0425	35.4467	26.2481	28.4998
chr17:59563665:59564521	chr17	59563665	59564521	.	857	-1.46852	2.43643	3.36713e-05	0.000843362	4.86906	2.49867	1.89208	9.38802	6.6512	10.0826
chr17:60710846:60711802	chr17	60710846	60711802	.	957	-0.771978	4.29593	2.13866e-05	0.000590346	15.5964	16.7818	12.2371	27.5465	26.9781	21.7434
chr17:60834468:60835305	chr17	60834468	60835305	.	838	-0.94616	3.28331	0.000212653	0.00346742	6.32008	6.3883	10.3199	17.5676	12.4037	14.3094
chr17:60876265:60876654	chr17	60876265	60876654	.	390	-1.04525	3.51292	1.22104e-05	0.00038143	15.2261	19.2173	21.2506	35.992	45.1364	33.4599
chr17:64416860:64417594	chr17	64416860	64417594	.	735	-0.905115	3.66474	5.65848e-05	0.00125829	11.1362	10.6825	13.2368	27.0164	18.0195	20.6333
chr17:64457870:64458633	chr17	64457870	64458633	.	764	-0.693267	4.53985	2.76343e-05	0.000723497	21.8471	23.1233	23.818	41.227	35.5487	34.3914
chr17:64545228:64546428	chr17	64545228	64546428	.	1201	-0.608865	4.22546	0.00084806	0.00982278	10.5569	12.9266	12.9013	21.5224	18.7053	15.1235
chr17:64726458:64727020	chr17	64726458	64727020	.	563	-1.89301	2.14974	3.26713e-06	0.000137548	3.70585	3.48652	1.92009	13.0743	13.4	7.83049
chr17:65014730:65015619	chr17	65014730	65015619	.	890	-1.0965	3.99257	1.36274e-07	1.12556e-05	10.2787	9.02258	14.1705	25.0041	24.2997	22.1914
chr17:68985269:68986012	chr17	68985269	68986012	.	744	-0.870186	4.84822	2.27702e-08	2.73795e-06	27.6115	30.7005	22.7632	49.4678	49.1231	49.7742
chr17:70147244:70148667	chr17	70147244	70148667	.	1424	-0.643321	6.22088	1.68441e-09	3.25527e-07	37.3053	41.4788	43.3972	59.3846	66.7536	64.5187
chr17:70178200:70179586	chr17	70178200	70179586	.	1387	-3.23001	3.36758	1.72178e-20	2.38914e-16	1.0414	1.80119	1.29898	10.8608	14.2629	13.8582
chr17:71488837:71489308	chr17	71488837	71489308	.	472	-1.31547	2.31868	0.000219483	0.00354463	5.10038	5.67097	6.10739	12.6935	16.6939	12.7027
chr17:73401703:73402186	chr17	73401703	73402186	.	484	-1.596	1.79362	0.000423282	0.00581301	4.97392	2.21215	2.23349	10.9641	7.62043	10.566
chr17:74964813:74966314	chr17	74964813	74966314	.	1502	-0.885466	4.26946	1.8255e-06	8.75885e-05	10.4715	7.12836	8.87645	17.3233	16.7426	15.0279
chr17:74990036:74991088	chr17	74990036	74991088	.	1053	-1.54978	3.26153	2.64661e-08	3.05527e-06	2.59104	4.74502	6.15959	14.7935	13.3737	11.0528
chr17:75470935:75471690	chr17	75470935	75471690	.	756	-0.838848	3.85678	6.09836e-05	0.00132801	12.9497	10.8579	16.4439	25.5867	22.6194	23.7923
chr17:77921210:77921804	chr17	77921210	77921804	.	595	-0.877093	4.54873	3.70522e-07	2.51043e-05	21.309	27.2918	33.6112	48.0459	47.0545	55.422
chr17:78942469:78943004	chr17	78942469	78943004	.	536	-1.44555	3.11235	5.88764e-07	3.61171e-05	12.5759	5.32676	6.72269	17.8846	20.6434	29.6098
chr17:79017742:79018804	chr17	79017742	79018804	.	1063	-0.99832	3.43076	5.38802e-05	0.00121292	6.64312	8.39354	4.57623	15.9426	10.4091	12.9395
chr17:79523096:79524035	chr17	79523096	79524035	.	940	-0.658811	4.55267	6.25965e-05	0.00135675	17.2443	21.4516	18.5918	27.6804	32.9948	29.6406
chr17:79699356:79699884	chr17	79699356	79699884	.	529	-1.60181	2.51552	4.34186e-06	0.000171791	4.24742	4.04794	6.81164	14.2382	11.0921	20.6678
chr17:80240975:80241886	chr17	80240975	80241886	.	912	-0.831283	4.41667	3.25366e-06	0.000137394	17.2458	18.3925	14.0262	22.7116	31.9857	33.8377
chr18:4157328:4158017	chr18	4157328	4158017	.	690	-1.03637	2.83816	0.000395808	0.00553317	4.65194	6.46546	8.35562	12.9006	13.6063	13.2896
chr18:4907899:4908857	chr18	4907899	4908857	.	959	-0.775513	4.01139	9.6662e-05	0.00189912	14.225	13.0253	9.01779	20.349	19.055	22.9852
chr18:10086460:10086988	chr18	10086460	10086988	.	529	-1.03734	3.55031	1.28608e-05	0.000397453	11.8321	19.2277	11.2392	30.0943	25.9872	30.6683
chr18:12968224:12969044	chr18	12968224	12969044	.	821	-0.738368	4.16274	8.20022e-05	0.00168025	16.6161	18.475	12.9475	26.063	27.5672	26.634
chr18:13135989:13136898	chr18	13135989	13136898	.	910	-0.723108	4.77042	3.10978e-06	0.000133019	23.9856	23.1392	19.7987	34.4244	39.7937	36.4312
chr18:13235293:13235783	chr18	13235293	13235783	.	491	-0.804761	3.57266	0.000518133	0.00677498	22.227	16.718	12.109	36.6071	26.9741	26.218
chr18:20863817:20864373	chr18	20863817	20864373	.	557	-0.903075	6.34613	1.3628e-15	3.1517e-12	85.8646	111.169	107.389	189.929	195.641	182.675
chr18:26667541:26668522	chr18	26667541	26668522	.	982	-0.839971	4.09572	1.42247e-05	0.000428959	13.4016	9.99446	13.2099	21.4413	23.389	20.8307
chr18:31895350:31896097	chr18	31895350	31896097	.	748	-0.950218	3.13373	0.00032997	0.00481661	8.36789	6.44125	8.18945	16.2485	11.8789	16.5027
chr18:32709777:32710215	chr18	32709777	32710215	.	439	-0.766586	3.77741	0.000342863	0.00495483	23.0319	23.1696	21.3411	36.6539	48.118	30.1269
chr18:33407457:33407965	chr18	33407457	33407965	.	509	-0.646603	4.93751	8.82053e-06	0.000297244	44.4584	43.4723	51.3249	69.6161	73.1202	75.1795
chr18:39945366:39946006	chr18	39945366	39946006	.	641	-0.738678	4.4167	3.29892e-05	0.000831078	26.54	17.5384	29.5127	47.2685	34.7853	40.9907
chr18:42323974:42325004	chr18	42323974	42325004	.	1031	-1.34563	2.50784	8.56502e-05	0.00173158	1.86799	4.67319	2.27176	5.81121	7.6426	8.89411
chr18:43599763:43600451	chr18	43599763	43600451	.	689	-1.16873	4.73446	8.01115e-12	4.83316e-09	19.3336	26.4173	24.8417	50.4352	58.8841	48.8846
chr18:43741712:43742288	chr18	43741712	43742288	.	577	-1.4195	3.49236	3.43453e-08	3.78234e-06	10.0134	12.9892	7.80624	20.1739	26.1498	36.3688
chr18:48050267:48051094	chr18	48050267	48051094	.	828	-0.962972	3.1353	0.000298535	0.00446483	5.42726	9.26715	6.09264	11.991	13.9708	14.4823
chr18:48274975:48275524	chr18	48274975	48275524	.	550	-1.61805	2.32678	1.72491e-05	0.00049802	6.12787	1.94669	4.25852	9.33718	11.2782	17.9549
chr18:50193928:50194451	chr18	50193928	50194451	.	524	-1.56031	2.22546	3.99366e-05	0.000956108	4.59423	3.06492	4.81365	14.0473	8.95836	14.1343
chr18:53670844:53671473	chr18	53670844	53671473	.	630	-0.998066	3.41856	4.51661e-05	0.00105631	11.7184	8.78071	12.2972	26.0848	18.8938	20.7133
chr18:53695446:53696173	chr18	53695446	53696173	.	728	-0.873084	3.8802	4.74385e-05	0.001097	12.1251	17.8937	11.8792	17.4003	29.7071	29.5519
chr18:53710411:53711762	chr18	53710411	53711762	.	1352	-0.690192	5.11347	1.92318e-06	9.13282e-05	19.3492	24.6816	14.1256	29.7542	30.0082	34.1729
chr18:56006142:56006797	chr18	56006142	56006797	.	656	-1.29529	2.12553	0.00085621	0.00990362	2.20187	2.72022	5.76757	7.82843	9.96696	8.33327
chr18:56038792:56039229	chr18	56038792	56039229	.	438	-0.910264	5.18901	3.40824e-10	9.05991e-08	46.1689	59.4822	66.6375	102.396	102.58	117.964
chr18:56179272:56179794	chr18	56179272	56179794	.	523	-1.12019	3.6089	2.84532e-06	0.000124078	10.7404	11.2595	21.0139	35.3492	31.4142	26.2997
chr18:56208521:56209633	chr18	56208521	56209633	.	1113	-0.619997	6.8858	6.06854e-11	2.32616e-08	75.1269	89.6241	85.9562	117.351	137.222	130.395
chr19:1260702:1261534	chr19	1260702	1261534	.	833	-0.631908	4.89869	2.1457e-05	0.000590748	27.5514	32.7759	22.9265	42.1275	41.2582	45.7263
chr19:1360609:1362589	chr19	1360609	1362589	.	1981	-0.820703	3.99221	4.20994e-05	0.000998925	4.94195	6.12538	6.00257	10.4558	11.4249	8.18957
chr19:2047152:2047935	chr19	2047152	2047935	.	784	-0.870265	3.36379	0.000346427	0.00498964	8.39307	8.6492	9.88166	15.7208	18.1763	15.295
chr19:2380870:2382098	chr19	2380870	2382098	.	1229	-0.60627	6.07416	3.10198e-08	3.49944e-06	41.7879	45.4465	42.5132	73.264	58.384	65.8595
chr19:2517761:2519089	chr19	2517761	2519089	.	1329	-0.928094	4.33716	2.9422e-07	2.10901e-05	10.7478	9.66754	10.4386	18.9343	19.0482	20.8321
chr19:2549494:2550251	chr19	2549494	2550251	.	758	-0.765359	4.5195	6.45062e-06	0.000234685	26.0429	21.6584	18.302	35.23	36.2724	41.1777
chr19:3387687:3388180	chr19	3387687	3388180	.	494	-2.45486	1.0441	0.000244614	0.00383966	1.94929	0.722456	0.364713	6.23739	7.1268	4.28363
chr19:3458856:3460169	chr19	3458856	3460169	.	1314	-1.28443	3.63879	5.31684e-08	5.36166e-06	4.51918	6.11118	5.48457	14.7211	11.8656	12.6151
chr19:5193150:5193889	chr19	5193150	5193889	.	740	-0.889516	3.46384	0.000235549	0.0037257	13.6635	7.71661	8.76493	22.2073	18.8039	15.2513
chr19:5664639:5665011	chr19	5664639	5665011	.	373	-1.46585	1.9005	0.00061083	0.00768996	3.44218	3.82727	7.24536	11.4733	12.1355	16.5469
chr19:6241422:6242310	chr19	6241422	6242310	.	889	-1.0273	3.1641	0.000120617	0.00224655	8.12388	6.624	4.25594	15.2119	10.5606	13.2902
chr19:8503742:8503973	chr19	8503742	8503973	.	232	-1.72783	1.69694	0.000338796	0.00491441	3.45888	6.9225	6.98927	30.2519	15.1752	12.1616
chr19:8527617:8527828	chr19	8527617	8527828	.	212	-2.29512	0.94278	0.000779983	0.00923975	1.51407	5.05038	0.849849	11.3044	12.6528	13.3089
chr19:9136917:9137434	chr19	9136917	9137434	.	518	-0.604998	4.67904	0.000107574	0.00205833	36.8697	36.8606	42.4334	60.1449	59.2275	57.1922
chr19:11202149:11203694	chr19	11202149	11203694	.	1546	-0.852042	6.39321	8.95326e-15	1.55513e-11	34.2576	40.6295	41.0214	64.9959	72.0046	71.9743
chr19:11205303:11206217	chr19	11205303	11206217	.	915	-0.694656	6.15592	2.97142e-10	8.24628e-08	63.8459	52.4613	61.2374	86.9939	99.1238	101.566
chr19:11815042:11816489	chr19	11815042	11816489	.	1448	-0.89723	4.46708	3.89682e-07	2.6132e-05	9.97532	11.8307	9.70518	19.388	15.9776	23.3825
chr19:12099191:12100100	chr19	12099191	12100100	.	910	-0.803305	4.7828	3.13627e-07	2.20011e-05	24.162	20.0017	20.9866	33.2958	39.6095	41.082
chr19:12110990:12111998	chr19	12110990	12111998	.	1009	-0.614304	5.2211	3.84964e-06	0.000157203	27.6765	29.7116	29.4626	45.4675	42.7016	44.7411
chr19:16383624:16384347	chr19	16383624	16384347	.	724	-0.609366	4.91015	3.14495e-05	0.000802194	32.1427	35.9851	29.3644	48.9428	46.312	53.5848
chr19:16670390:16671194	chr19	16670390	16671194	.	805	-1.06267	3.87897	1.03587e-06	5.5712e-05	9.5697	13.522	11.6382	30.8339	23.5334	17.9629
chr19:17245699:17247199	chr19	17245699	17247199	.	1501	-0.702015	6.14566	2.60904e-10	7.41866e-08	34.2154	31.3857	41.6511	56.5663	59.42	58.3893
chr19:18484675:18485829	chr19	18484675	18485829	.	1155	-0.667307	4.15492	0.000366985	0.00523145	10.2826	14.2139	10.6073	19.119	20.0308	16.4892
chr19:33963337:33964889	chr19	33963337	33964889	.	1553	-0.691963	7.28553	1.2804e-14	2.01896e-11	72.0301	75.722	82.2531	125.989	119.179	126.267
chr19:37068033:37068820	chr19	37068033	37068820	.	788	-1.39896	2.97862	1.34769e-06	6.84501e-05	5.90642	4.98201	4.80143	16.0754	11.9142	13.6509
chr19:42806084:42807305	chr19	42806084	42807305	.	1222	-0.889749	3.75545	5.22345e-05	0.00118394	9.19348	8.46964	4.86542	13.448	14.8168	13.7091
chr19:42856463:42857025	chr19	42856463	42857025	.	563	-1.58819	1.94034	0.000223219	0.00358826	2.85065	2.2187	4.16018	7.60131	14.2934	5.95118
chr19:44123155:44124360	chr19	44123155	44124360	.	1206	-0.68747	3.87872	0.000817683	0.00955225	10.7793	9.9137	6.57329	14.3361	15.4304	14.3297
chr19:44281509:44282496	chr19	44281509	44282496	.	988	-0.602725	5.03986	1.59546e-05	0.000469835	25.6657	25.1053	27.7182	39.85	39.7064	39.6236
chr19:46133645:46134405	chr19	46133645	46134405	.	761	-0.615159	6.82361	8.10706e-11	2.92952e-08	110.509	118.652	122.637	180.404	190.561	167.537
chr19:46458995:46460191	chr19	46458995	46460191	.	1197	-0.683826	5.09611	1.81848e-06	8.75243e-05	18.9051	19.3802	26.9424	35.3232	38.0958	31.0846
chr19:46462185:46462918	chr19	46462185	46462918	.	734	-0.749296	4.82592	1.31853e-06	6.71657e-05	24.7079	27.2289	33.6281	42.4456	52.5332	48.5303
chr19:47174051:47174444	chr19	47174051	47174444	.	394	-0.831241	3.39569	0.00053473	0.00694862	17.1083	19.4751	19.2057	31.2819	37.019	30.8824
chr19:47644579:47645167	chr19	47644579	47645167	.	589	-0.779424	3.77795	0.000289578	0.00437044	11.9892	17.875	20.4945	27.6099	27.0402	31.4363
chr19:48101945:48102669	chr19	48101945	48102669	.	725	-0.605458	5.16239	9.26295e-06	0.000308528	39.4035	32.9819	43.9858	56.4309	60.1225	60.5646
chr19:48673143:48674026	chr19	48673143	48674026	.	884	-0.764979	4.34886	3.01689e-05	0.000776667	20.3338	12.5155	17.3238	24.2055	25.2233	36.3059
chr19:49127010:49127628	chr19	49127010	49127628	.	619	-0.774754	4.12022	4.47429e-05	0.00104911	22.557	19.3149	18.9191	37.3336	32.2298	34.7558
chr19:49376047:49376871	chr19	49376047	49376871	.	825	-0.643049	4.56209	0.000106275	0.00203852	22.177	25.0907	18.7811	35.4813	39.423	28.2148
chr19:52324697:52325458	chr19	52324697	52325458	.	762	-2.11124	2.5261	8.02424e-09	1.15263e-06	2.10619	3.27855	2.60085	11.9063	13.6408	9.02542
chr19:54931229:54932356	chr19	54931229	54932356	.	1128	-0.611652	4.60175	0.000144337	0.00258229	16.6468	17.2435	16.4515	26.2539	22.2938	28.4525
chr19:55624469:55625461	chr19	55624469	55625461	.	993	-0.646942	4.17116	0.000574426	0.00735362	15.5158	13.6575	12.3378	22.0657	26.5065	16.5155
chr19:57764825:57765683	chr19	57764825	57765683	.	859	-0.612857	4.55189	0.000270707	0.00414789	16.4415	28.2523	19.2962	29.4935	33.3737	34.6937
chr19:58986019:58986371	chr19	58986019	58986371	.	353	-1.88013	1.61885	0.000153478	0.00269918	2.72791	4.04412	3.06235	11.6384	9.97348	14.9866
chr2:3172097:3173530	chr2	3172097	3173530	.	1434	-0.611136	6.22486	8.17137e-09	1.17134e-06	42.4173	38.8252	41.9638	57.6574	68.9771	61.6093
chr2:3199432:3199932	chr2	3199432	3199932	.	501	-1.82603	1.75747	9.24622e-05	0.00183077	2.88309	2.84945	2.1577	11.6171	10.0389	6.68765
chr2:3285914:3286716	chr2	3285914	3286716	.	803	-0.685786	4.87993	8.49864e-06	0.000289144	34.3768	23.3336	25.3537	42.4223	53.6562	37.9916
chr2:3469097:3470196	chr2	3469097	3470196	.	1100	-0.668706	4.8102	1.52185e-05	0.000452188	15.3197	21.5758	21.6202	34.3919	28.1956	30.1386
chr2:8256036:8256528	chr2	8256036	8256528	.	493	-0.750518	4.261	4.16123e-05	0.000990415	23.7645	31.1286	30.698	45.1392	43.1876	55.4424
chr2:8395536:8396072	chr2	8395536	8396072	.	537	-0.687564	4.02646	0.000633806	0.00790179	21.2196	23.5935	23.4856	25.5019	33.7172	50.8997
chr2:8609763:8610529	chr2	8609763	8610529	.	767	-0.66599	5.86245	1.25999e-08	1.65879e-06	61.0999	49.3229	64.3625	83.4705	91.3656	102.771
chr2:8773725:8774452	chr2	8773725	8774452	.	728	-0.600738	4.26353	0.000770601	0.00916392	18.7387	23.7765	19.3037	32.9195	28.5557	32.2165
chr2:10344751:10345266	chr2	10344751	10345266	.	516	-0.658623	5.24746	1.44763e-06	7.25515e-05	67.4936	54.9864	46.7878	78.6241	95.1963	94.3229
chr2:12146779:12147592	chr2	12146779	12147592	.	814	-0.689294	4.6241	1.88942e-05	0.000533745	21.2938	24.7721	22.5763	36.8019	39.9557	33.7954
chr2:12208725:12209337	chr2	12208725	12209337	.	613	-1.70748	2.65182	2.78679e-07	2.02883e-05	3.40358	5.53097	4.70259	14.5211	15.042	14.9589
chr2:15183004:15183613	chr2	15183004	15183613	.	610	-1.08502	3.63319	3.23266e-06	0.000136828	12.1027	9.65367	16.2447	25.8175	31.606	23.1269
chr2:16108068:16108634	chr2	16108068	16108634	.	567	-1.30843	2.63156	5.82818e-05	0.00128449	3.96276	8.18274	5.71962	11.4725	19.2191	13.3734
chr2:20227036:20228036	chr2	20227036	20228036	.	1001	-0.641148	5.22681	1.9322e-06	9.16935e-05	26.9357	28.7012	31.3179	46.6859	48.7372	39.9898
chr2:20347949:20349701	chr2	20347949	20349701	.	1753	-0.841636	6.22015	8.09763e-14	9.68644e-11	30.6701	27.79	32.4775	49.8995	55.0862	58.0432
chr2:23503143:23503629	chr2	23503143	23503629	.	487	-1.13899	2.66949	0.00038671	0.00544218	6.59104	12.0919	4.43946	13.7086	23.0647	14.1219
chr2:24652151:24653346	chr2	24652151	24653346	.	1196	-0.758858	7.15066	7.00541e-16	1.80013e-12	83.3323	84.0012	96.8629	151.573	141.997	153.342
chr2:27623472:27624741	chr2	27623472	27624741	.	1270	-0.822596	3.53771	0.000379743	0.00536809	5.56035	7.44698	6.24204	12.131	12.6727	9.16427
chr2:28139550:28140038	chr2	28139550	28140038	.	489	-1.25237	2.63153	0.00010225	0.00198325	7.22049	6.20366	7.73728	23.1043	11.3138	16.2279
chr2:28631182:28632764	chr2	28631182	28632764	.	1583	-0.660062	6.38853	2.04995e-10	6.15695e-08	41.9732	37.7635	42.7942	60.557	68.9449	64.1651
chr2:29710984:29711537	chr2	29710984	29711537	.	554	-1.25987	3.65866	9.60419e-08	8.5428e-06	9.84968	13.5284	15.9354	36.4611	30.5642	26.7379
chr2:30818668:30819492	chr2	30818668	30819492	.	825	-0.674411	4.12323	0.000317392	0.00467828	17.1191	14.2757	16.3789	24.0692	25.4014	26.9323
chr2:33107915:33108691	chr2	33107915	33108691	.	777	-0.748524	4.70575	3.20469e-06	0.000136155	22.1012	24.3441	27.8252	38.7747	36.68	49.2489
chr2:36635414:36635976	chr2	36635414	36635976	.	563	-0.847222	3.25774	0.000781993	0.00925304	9.69222	11.4104	14.0806	18.5472	20.8445	23.8047
chr2:40598779:40599622	chr2	40598779	40599622	.	844	-0.811921	3.42042	0.000678858	0.00832877	10.2684	8.88004	7.47142	14.1975	17.8773	14.8345
chr2:43115553:43116194	chr2	43115553	43116194	.	642	-1.27028	4.12831	1.27572e-09	2.58046e-07	17.7491	18.6229	10.3835	39.9957	30.5529	42.8496
chr2:43327969:43329073	chr2	43327969	43329073	.	1105	-0.814691	4.47957	6.65715e-06	0.000240565	11.0384	10.8198	21.5223	24.0119	25.6405	26.3317
chr2:43333878:43334838	chr2	43333878	43334838	.	961	-0.981503	5.10803	9.35396e-11	3.27767e-08	24.3827	19.1259	28.122	40.4352	54.7783	46.2418
chr2:43337602:43337950	chr2	43337602	43337950	.	349	-1.70925	2.64934	3.10611e-07	2.18784e-05	7.81765	7.66962	8.25985	21.0911	33.6259	23.2429
chr2:43395404:43396825	chr2	43395404	43396825	.	1422	-0.687031	6.10159	1.08247e-09	2.27198e-07	35.8906	31.9999	42.5713	61.0331	52.582	64.2374
chr2:46980621:46981436	chr2	46980621	46981436	.	816	-1.28202	3.2181	2.89947e-06	0.000125875	4.1303	7.21659	7.94859	20.9781	13.149	12.5342
chr2:47536740:47538696	chr2	47536740	47538696	.	1957	-0.665616	5.8464	1.22756e-08	1.61916e-06	20.5843	26.1697	21.0825	38.5749	32.6389	36.3138
chr2:55338432:55339505	chr2	55338432	55339505	.	1074	-0.623373	5.40617	9.55724e-07	5.2129e-05	33.9215	28.2457	30.1958	48.1349	48.0782	46.3023
chr2:58796250:58797543	chr2	58796250	58797543	.	1294	-0.908505	3.95238	8.88178e-06	0.000298266	6.57347	8.41209	9.46787	14.0226	15.8062	15.9444
chr2:64693755:64694401	chr2	64693755	64694401	.	647	-0.724473	4.574	1.84137e-05	0.000523616	21.5808	28.6838	32.0237	50.7989	35.7583	49.0598
chr2:65272692:65273478	chr2	65272692	65273478	.	787	-1.05093	3.11258	9.02945e-05	0.00179863	7.54536	7.70926	5.26539	14.3558	15.5507	12.772
chr2:68052492:68053181	chr2	68052492	68053181	.	690	-1.43645	3.72917	1.47267e-09	2.91094e-07	10.2343	12.9309	7.05005	29.2745	28.6705	24.0235
chr2:69247620:69248604	chr2	69247620	69248604	.	985	-1.10481	2.98874	0.000122199	0.00227175	2.93285	4.16677	7.68229	10.0797	9.53133	11.9949
chr2:69396500:69397742	chr2	69396500	69397742	.	1243	-1.02617	5.74014	4.43982e-15	9.33438e-12	28.0183	32.8755	23.4813	63.3496	53.9499	54.6194
chr2:69902194:69903147	chr2	69902194	69903147	.	954	-0.856762	5.01866	1.28964e-08	1.69141e-06	25.0663	21.1368	25.4955	42.8851	51.6655	35.3055
chr2:70335516:70336650	chr2	70335516	70336650	.	1135	-0.66079	5.4365	1.75444e-07	1.36768e-05	29.9773	30.0293	27.9379	47.961	45.7897	45.3675
chr2:70823251:70824555	chr2	70823251	70824555	.	1305	-0.603665	4.95169	3.38113e-05	0.000846259	21.8908	17.5028	16.2911	26.4971	27.6204	30.8093
chr2:71203323:71205116	chr2	71203323	71205116	.	1794	-0.60133	4.75513	8.65107e-05	0.00174247	12.8823	12.0357	10.4445	16.6029	19.1573	17.9881
chr2:72742635:72743337	chr2	72742635	72743337	.	703	-0.875139	3.74086	5.46587e-05	0.00122369	14.6109	12.1841	12.3017	26.2982	25.0401	20.5691
chr2:85968869:85970123	chr2	85968869	85970123	.	1255	-0.819127	3.79576	0.000168588	0.00289879	5.11528	9.81101	8.61361	11.3212	15.2287	14.7538
chr2:85992246:85992839	chr2	85992246	85992839	.	594	-1.19157	3.50947	2.42123e-06	0.000109081	18.1026	6.60913	8.79608	25.072	29.3528	23.1561
chr2:86012182:86012833	chr2	86012182	86012833	.	652	-0.83992	3.66896	0.000151539	0.00267322	13.2923	13.4109	14.0929	24.1545	20.0562	28.9397
chr2:96685443:96686351	chr2	96685443	96686351	.	909	-0.811423	4.23259	1.16461e-05	0.000367914	12.5357	16.0975	15.6582	28.2478	25.8206	23.4736
chr2:97074364:97075758	chr2	97074364	97075758	.	1395	-0.778256	4.92815	1.7007e-07	1.33347e-05	15.3014	16.3736	16.0149	26.0147	29.564	26.167
chr2:97750672:97751308	chr2	97750672	97751308	.	637	-0.660814	4.03523	0.0006352	0.00791363	19.1482	19.0492	20.3644	26.3356	36.3196	29.898
chr2:99914521:99914915	chr2	99914521	99914915	.	395	-1.04848	2.91251	0.000282728	0.00428946	9.34509	15.8117	10.4908	26.0023	18.2504	29.4649
chr2:100902076:100903261	chr2	100902076	100903261	.	1186	-0.656414	5.86252	1.89393e-08	2.35064e-06	42.3558	32.4995	38.5857	63.7962	63.0452	52.1891
chr2:105405283:105406628	chr2	105405283	105406628	.	1346	-1.10897	2.7617	0.000312873	0.0046274	3.69632	3.84469	1.4724	6.86761	7.47323	5.2405
chr2:105452283:105452710	chr2	105452283	105452710	.	428	-0.698686	3.99679	0.000443785	0.00602498	22.4989	25.8497	35.3601	50.3946	45.8294	39.1415
chr2:106084072:106084923	chr2	106084072	106084923	.	852	-1.55052	4.60958	1.06918e-15	2.55792e-12	15.258	15.4989	12.265	31.1422	47.2252	48.0182
chr2:106629740:106630097	chr2	106629740	106630097	.	358	-4.04823	0.604318	1.98634e-05	0.000556368	0.448301	0.498454	0	5.73793	5.61953	7.38866
chr2:109789608:109790478	chr2	109789608	109790478	.	871	-0.976729	3.45088	5.52325e-05	0.00123494	8.66029	7.78527	8.06722	17.6881	18.6705	11.9451
chr2:109901244:109902443	chr2	109901244	109902443	.	1200	-0.786715	4.73716	7.46369e-07	4.34422e-05	14.4443	18.4395	15.4644	28.3876	30.0372	24.8349
chr2:114721123:114721754	chr2	114721123	114721754	.	632	-0.98341	2.90408	0.000551522	0.00712164	6.60251	6.77645	9.40751	16.5223	16.1813	12.277
chr2:119966099:119967135	chr2	119966099	119967135	.	1037	-0.653165	5.33297	6.85114e-07	4.07311e-05	27.703	34.588	27.6246	47.5413	43.9736	49.8249
chr2:121257629:121258349	chr2	121257629	121258349	.	721	-1.41434	3.61745	4.1121e-09	6.77666e-07	9.34904	8.66246	8.9959	23.03	23.0198	26.1701
chr2:121269459:121269618	chr2	121269459	121269618	.	160	-1.9598	1.53271	0.000171474	0.00293605	10.0307	4.46116	4.5042	22.4676	28.2908	25.3493
chr2:121667756:121668232	chr2	121667756	121668232	.	477	-1.07338	2.89356	0.000184798	0.00311196	8.41152	8.23024	12.0867	19.7379	21.088	19.5936
chr2:121709366:121710506	chr2	121709366	121710506	.	1141	-0.602936	4.86687	5.14236e-05	0.00116899	20.3955	19.393	20.3696	26.4049	29.6803	35.3922
chr2:121832329:121833109	chr2	121832329	121833109	.	781	-0.79982	3.74652	0.000294647	0.00442577	12.9462	13.9376	9.68893	14.466	22.5393	26.8691
chr2:128155548:128156275	chr2	128155548	128156275	.	728	-0.760911	5.74048	3.33494e-10	8.96815e-08	47.8389	52.9457	61.8709	94.291	89.5819	91.3203
chr2:129395870:129397179	chr2	129395870	129397179	.	1310	-0.700538	5.87619	2.07032e-09	3.83037e-07	36.5088	36.9153	28.3318	56.1894	51.8305	57.6143
chr2:129401383:129402381	chr2	129401383	129402381	.	999	-1.67968	4.40314	1.48901e-16	5.21498e-13	10.2818	9.82439	9.55846	32.043	29.5358	33.7152
chr2:133038988:133039234	chr2	133038988	133039234	.	247	-0.889122	3.39465	0.000227772	0.00363952	30.5389	29.6207	26.2593	49.206	57.6931	53.5454
chr2:136946819:136947374	chr2	136946819	136947374	.	556	-1.05209	3.05761	0.000131466	0.00239967	8.37098	12.196	7.45299	16.3177	18.3932	23.4701
chr2:144574348:144575082	chr2	144574348	144575082	.	735	-0.821867	3.64659	0.000259807	0.00402802	8.73425	13.3531	13.9722	18.3991	24.178	20.8732
chr2:150216486:150217070	chr2	150216486	150217070	.	585	-0.932995	4.51934	8.71782e-08	7.91678e-06	23.3193	27.1483	29.258	48.8672	43.8468	59.3838
chr2:153312769:153313140	chr2	153312769	153313140	.	372	-0.996971	2.82546	0.00062081	0.0077761	11.2172	10.5533	14.5297	21.1676	24.3362	27.0203
chr2:153474374:153475322	chr2	153474374	153475322	.	949	-0.670356	5.45584	1.28582e-07	1.07742e-05	39.7424	34.2226	32.0847	56.4593	55.6476	57.0466
chr2:153899822:153900282	chr2	153899822	153900282	.	461	-0.928603	3.29072	0.000319425	0.00470258	8.00718	17.806	16.8053	27.1068	22.5472	30.9843
chr2:161173510:161174477	chr2	161173510	161174477	.	968	-0.717081	5.62202	1.05272e-08	1.4463e-06	42.9415	31.7075	39.8305	70.5594	61.6562	56.2912
chr2:161929279:161929616	chr2	161929279	161929616	.	338	-1.24888	2.24447	0.000636979	0.00792588	6.64759	7.39128	9.0617	15.7001	15.3761	23.9993
chr2:168801378:168801899	chr2	168801378	168801899	.	522	-1.32216	2.74577	1.88253e-05	0.000532449	7.07148	6.15333	7.59329	13.7732	20.5547	17.9045
chr2:170333006:170333407	chr2	170333006	170333407	.	402	-1.45558	1.88848	0.000743206	0.00892568	4.39157	2.21948	6.72269	11.0714	10.426	15.3532
chr2:176651067:176651587	chr2	176651067	176651587	.	521	-1.14839	2.67839	0.000390711	0.0054818	12.0138	3.76759	5.53299	10.514	20.2724	17.262
chr2:179320313:179321031	chr2	179320313	179321031	.	719	-0.726334	4.62512	6.95003e-06	0.000248553	23.6608	24.5705	28.3157	42.3788	42.2038	41.9396
chr2:191837683:191838357	chr2	191837683	191838357	.	675	-3.13244	1.08644	1.47814e-05	0.000442421	0.237766	0	1.33458	5.32565	3.97391	4.96372
chr2:197791094:197792106	chr2	197791094	197792106	.	1013	-0.819486	3.89516	7.30217e-05	0.00152874	8.55534	13.0356	9.60422	18.2504	17.3773	19.3228
chr2:197874959:197875893	chr2	197874959	197875893	.	935	-0.983644	4.70604	4.89994e-09	7.7616e-07	14.0752	21.5663	20.0401	33.504	41.0606	35.0799
chr2:200663371:200663773	chr2	200663371	200663773	.	403	-1.28234	2.69567	6.67397e-05	0.00142386	9.15958	11.5127	5.81187	12.3183	27.0402	25.3794
chr2:201001276:201001670	chr2	201001276	201001670	.	395	-1.37201	2.3619	0.000126334	0.00232673	4.06308	9.9388	6.3857	14.3012	19.0993	19.1968
chr2:202192152:202192930	chr2	202192152	202192930	.	779	-1.29643	2.25058	0.000449617	0.00608315	2.47227	3.66514	3.7005	6.59236	11.4062	6.11201
chr2:202834481:202835375	chr2	202834481	202835375	.	895	-1.14436	3.78339	3.20044e-07	2.22938e-05	8.60738	11.1654	8.25351	25.4382	17.6079	18.915
chr2:202836128:202836913	chr2	202836128	202836913	.	786	-0.607406	4.81605	6.03689e-05	0.00131835	30.424	24.0653	29.5696	45.3	45.4317	37.4672
chr2:202901134:202902384	chr2	202901134	202902384	.	1251	-0.925338	3.75378	2.73054e-05	0.000716509	6.15796	7.84537	7.77703	10.1258	16.2155	14.9419
chr2:205222083:205222706	chr2	205222083	205222706	.	624	-0.920443	3.91915	8.73983e-06	0.000295214	14.1459	16.3004	18.7675	26.3356	33.5836	33.0643
chr2:205356268:205356684	chr2	205356268	205356684	.	417	-0.674191	4.03651	0.000444202	0.00602635	29.2503	30.383	29.3799	46.7978	45.0281	50.3232
chr2:206639341:206640530	chr2	206639341	206640530	.	1190	-0.893305	5.40905	1.28244e-10	4.29833e-08	31.2892	20.3939	22.4074	51.6422	44.9413	41.6406
chr2:206699577:206700489	chr2	206699577	206700489	.	913	-0.90217	3.94577	1.65029e-05	0.000482296	13.0081	14.2679	7.1041	23.6242	19.4642	21.4393
chr2:206756747:206758069	chr2	206756747	206758069	.	1323	-0.813348	4.44852	3.25971e-06	0.000137436	13.9505	12.0043	9.26033	19.279	21.669	21.1931
chr2:207902372:207902954	chr2	207902372	207902954	.	583	-1.56113	2.65063	2.10573e-06	9.78414e-05	5.23044	3.673	6.48976	11.7449	17.2538	16.6361
chr2:207987623:207988590	chr2	207987623	207988590	.	968	-0.825065	4.81597	1.49855e-07	1.2146e-05	20.8905	22.4902	18.7985	43.3259	34.6383	32.2445
chr2:214991563:214993152	chr2	214991563	214993152	.	1590	-0.770189	3.65427	0.00045914	0.00617707	5.24879	6.39714	5.43903	9.90485	10.2277	8.9835
chr2:220551980:220552307	chr2	220551980	220552307	.	328	-1.01482	3.80489	3.46613e-06	0.000144433	29.8476	26.1141	26.366	53.2333	43.9568	69.8919
chr2:220563162:220564553	chr2	220563162	220564553	.	1392	-0.644299	5.41361	5.40662e-07	3.38735e-05	26.4027	20.3829	24.2036	38.7372	34.3248	38.1316
chr2:223991024:223991813	chr2	223991024	223991813	.	790	-1.84259	3.23312	2.70824e-10	7.60562e-08	3.25047	5.64704	6.15764	19.5017	21.0092	13.1699
chr2:224127351:224128437	chr2	224127351	224128437	.	1087	-0.727912	5.36914	3.08323e-08	3.48964e-06	27.7576	26.4305	30.9949	49.2915	49.0455	42.6662
chr2:224402216:224404206	chr2	224402216	224404206	.	1991	-0.992344	6.16271	7.40369e-17	3.02158e-13	23.6989	27.1569	20.994	47.8896	46.733	48.3592
chr2:224589697:224591017	chr2	224589697	224591017	.	1321	-0.637721	6.16891	4.27735e-09	6.9337e-07	40.4571	47.955	38.8705	66.2179	70.6894	61.0058
chr2:225774288:225775231	chr2	225774288	225775231	.	944	-0.738195	3.76577	0.000509878	0.0066986	11.7309	8.50646	11.2605	17.9523	18.6474	16.0651
chr2:227342395:227343558	chr2	227342395	227343558	.	1164	-0.694175	4.33613	0.000145263	0.00259083	11.5819	16.2503	11.2992	21.6183	26.0692	15.4527
chr2:230766402:230766917	chr2	230766402	230766917	.	516	-0.693828	3.91199	0.000758949	0.0090674	15.5515	21.7871	28.2822	34.5017	40.2878	30.7575
chr2:232578605:232578973	chr2	232578605	232578973	.	369	-1.99914	1.41346	0.000325561	0.0047683	3.91443	2.90157	0.48826	9.74204	11.3584	9.07998
chr2:234117997:234118942	chr2	234117997	234118942	.	946	-0.677352	6.034	9.61423e-10	2.07799e-07	53.4407	54.5149	51.0412	83.6003	81.8753	88.917
chr2:234912191:234913798	chr2	234912191	234913798	.	1608	-0.729298	6.91315	6.86409e-14	8.50412e-11	58.6873	51.714	58.2633	86.336	103.321	90.0357
chr2:235046005:235046592	chr2	235046005	235046592	.	588	-0.733886	4.80937	4.17779e-06	0.000166297	33.8452	29.1341	43.2035	60.2629	70.7093	45.2853
chr2:235298071:235298700	chr2	235298071	235298700	.	630	-0.640866	4.47245	0.00014671	0.00260985	31.8436	24.6426	24.5944	40.2141	46.3032	40.3069
chr2:235504940:235505624	chr2	235504940	235505624	.	685	-0.919896	4.1783	1.40269e-06	7.08217e-05	20.6179	15.1093	17.8853	34.2363	31.8167	35.7834
chr2:235638374:235639288	chr2	235638374	235639288	.	915	-0.765924	4.98463	1.80912e-07	1.39679e-05	22.8021	24.3779	28.945	43.9647	42.5078	42.7848
chr2:235904614:235905598	chr2	235904614	235905598	.	985	-0.624052	4.3621	0.00039865	0.005555	17.4341	14.1308	16.8279	19.4643	29.445	25.7801
chr2:235959559:235960146	chr2	235959559	235960146	.	588	-0.643656	5.27012	1.03101e-06	5.54937e-05	51.3137	52.1987	48.7189	80.0594	78.1223	79.7741
chr2:235962952:235963490	chr2	235962952	235963490	.	539	-0.991357	5.69845	1.70888e-14	2.5226e-11	72.0575	62.9033	56.8248	136.247	121.305	124.65
chr2:236115649:236116145	chr2	236115649	236116145	.	497	-2.48862	1.06659	0.000185976	0.00312558	1.61461	0.718095	0.725022	4.47759	4.38519	9.22517
chr2:236152973:236153845	chr2	236152973	236153845	.	873	-0.794733	5.95387	9.28552e-12	5.50623e-09	48.1659	51.3059	55.5157	82.1593	91.9863	94.5343
chr2:236993979:236994889	chr2	236993979	236994889	.	911	-1.11877	3.65818	1.11007e-06	5.87916e-05	10.3941	7.24756	7.71301	20.1058	17.4826	17.8085
chr2:237016613:237017850	chr2	237016613	237017850	.	1238	-1.29115	2.84257	2.62832e-05	0.000695473	4.01878	1.87383	3.63829	7.605	5.28136	10.6831
chr2:237690812:237692011	chr2	237690812	237692011	.	1200	-1.03567	3.06682	0.000144752	0.00258675	3.34358	4.75858	5.10476	8.41643	10.4781	8.08238
chr2:238185476:238186109	chr2	238185476	238186109	.	634	-0.712048	5.01534	8.44987e-07	4.77793e-05	36.1993	37.1529	41.4898	69.1206	63.7279	55.0723
chr2:238583066:238584215	chr2	238583066	238584215	.	1150	-0.721848	3.78348	0.00062966	0.00785999	8.79216	7.13786	10.4967	14.7365	13.7035	15.1808
chr2:239847839:239848255	chr2	239847839	239848255	.	417	-2.02641	1.96228	8.87613e-06	0.000298266	2.69411	4.70722	2.59234	22.9884	12.4631	5.4975
chr2:240217160:240217736	chr2	240217160	240217736	.	577	-0.926014	3.95034	1.14183e-05	0.000362065	18.0797	15.4633	20.6085	27.5908	27.8931	47.6767
chr2:240248206:240249026	chr2	240248206	240249026	.	821	-0.775772	4.18195	4.52589e-05	0.00105797	15.6387	16.3015	16.0198	21.6844	25.1168	35.4404
chr20:2668852:2669598	chr20	2668852	2669598	.	747	-0.985542	2.9126	0.000514674	0.00673737	7.94939	5.25546	6.02972	14.8953	12.3437	11.0952
chr20:4199425:4199757	chr20	4199425	4199757	.	333	-1.58764	3.43148	3.34028e-09	5.7081e-07	21.2061	17.6839	7.57463	47.8075	45.3106	48.1898
chr20:4684470:4685215	chr20	4684470	4685215	.	746	-1.1439	2.57341	0.000408672	0.00566054	6.66923	4.06648	3.13966	10.0965	10.7871	10.1645
chr20:4697028:4697692	chr20	4697028	4697692	.	665	-1.19946	3.39382	1.91633e-06	9.11276e-05	9.17096	10.4653	8.12788	22.3952	24.4541	16.9713
chr20:4700446:4701739	chr20	4700446	4701739	.	1294	-0.693541	4.78698	5.56735e-06	0.00020913	15.9996	16.4105	15.8726	27.3838	25.9118	24.8025
chr20:5803664:5804412	chr20	5803664	5804412	.	749	-1.1515	3.85179	1.07497e-07	9.33436e-06	11.9994	12.3888	10.584	28.3398	26.6359	22.8374
chr20:8311485:8313222	chr20	8311485	8313222	.	1738	-0.624634	5.53575	6.24026e-07	3.77462e-05	20.2231	17.7625	24.5684	35.1622	30.0959	31.1491
chr20:10617804:10618624	chr20	10617804	10618624	.	821	-0.685752	4.40208	0.000105154	0.00202319	19.1574	20.2138	18.8727	40.4497	24.3	28.9967
chr20:10630075:10631285	chr20	10630075	10631285	.	1211	-0.6104	6.05446	6.74232e-08	6.49697e-06	35.6501	46.8588	47.3108	62.6205	59.1134	76.1579
chr20:10651905:10652738	chr20	10651905	10652738	.	834	-0.63053	4.81176	3.71555e-05	0.000903873	22.3226	25.2478	30.8921	36.1247	43.822	41.2312
chr20:11339337:11339722	chr20	11339337	11339722	.	386	-1.20788	2.48423	0.000307585	0.00457651	8.31564	6.93445	9.33513	14.6347	18.676	23.756
chr20:11438053:11438686	chr20	11438053	11438686	.	634	-0.747773	3.8673	0.000265985	0.00409998	17.7199	16.3248	16.1981	31.3203	24.5921	28.6487
chr20:15799113:15799363	chr20	15799113	15799363	.	251	-1.34848	2.50309	6.961e-05	0.00147432	12.7882	9.24225	13.6382	29.3259	40.0755	21.7794
chr20:17004964:17005543	chr20	17004964	17005543	.	580	-1.34572	2.59816	4.10454e-05	0.000979274	6.08762	5.84566	4.65952	10.6251	12.4292	19.4585
chr20:17891479:17892025	chr20	17891479	17892025	.	547	-1.04152	3.81476	2.09923e-06	9.78135e-05	12.0296	15.9852	21.4094	31.2946	37.3916	32.5605
chr20:21080923:21081806	chr20	21080923	21081806	.	884	-1.77333	2.06537	1.74276e-05	0.000501504	1.99707	2.42235	1.42667	9.10128	5.68946	5.38603
chr20:24386327:24386766	chr20	24386327	24386766	.	440	-1.29606	3.08236	5.44421e-06	0.000205383	6.93033	8.92233	16.3789	30.3458	26.6715	21.6421
chr20:30191800:30192573	chr20	30191800	30192573	.	774	-0.731363	4.43061	2.27113e-05	0.000617199	23.0163	21.9024	16.7598	34.7229	33.5732	34.4028
chr20:31012986:31013577	chr20	31012986	31013577	.	592	-1.51988	2.23266	5.6982e-05	0.00126469	4.33762	2.11001	4.8694	11.2772	11.3277	10.1278
chr20:35019397:35020448	chr20	35019397	35020448	.	1052	-0.683935	4.64402	2.06951e-05	0.000576174	18.3071	18.9981	16.6124	27.6624	32.988	25.9821
chr20:36825950:36826816	chr20	36825950	36826816	.	867	-0.915432	3.5822	0.000115649	0.00217918	6.2938	8.23283	13.5074	20.7313	18.1765	13.6274
chr20:42365531:42365813	chr20	42365531	42365813	.	283	-1.27333	2.23454	0.000523772	0.00683841	6.80531	8.19719	12.0961	22.3806	23.1036	19.9398
chr20:42410716:42411107	chr20	42410716	42411107	.	392	-0.786322	4.57155	2.06012e-06	9.64448e-05	44.6265	42.7908	44.1228	76.4203	81.6863	68.8276
chr20:42593552:42594377	chr20	42593552	42594377	.	826	-0.701955	4.61039	2.47535e-05	0.000663345	22.9274	27.2207	16.3591	39.9976	31.6626	36.7203
chr20:43965937:43966905	chr20	43965937	43966905	.	969	-0.731944	4.10692	0.000119701	0.00223189	14.4095	12.5226	12.2715	22.4356	24.0488	18.7444
chr20:44844162:44845086	chr20	44844162	44845086	.	925	-0.613676	5.25489	4.36147e-06	0.000172225	30.7103	28.9373	37.397	50.1516	45.6731	52.6169
chr20:44978873:44979954	chr20	44978873	44979954	.	1082	-0.714773	5.5662	8.4523e-09	1.20415e-06	35.0056	30.016	33.6358	56.164	53.6106	52.3161
chr20:46827569:46828582	chr20	46827569	46828582	.	1014	-1.83937	2.39102	6.00829e-07	3.66589e-05	2.21586	2.46376	1.59912	9.11618	6.94406	6.6085
chr20:47035148:47037012	chr20	47035148	47037012	.	1865	-0.711182	6.67579	1.51053e-12	1.18944e-09	39.1548	43.8223	41.3469	70.4919	60.6774	72.3336
chr20:47367605:47368370	chr20	47367605	47368370	.	766	-1.22856	3.55011	3.86031e-07	2.59775e-05	8.59029	10.2502	7.76181	21.2301	16.6336	24.6327
chr20:48388616:48389399	chr20	48388616	48389399	.	784	-0.618912	6.65802	3.09059e-10	8.44194e-08	91.7096	107.887	104.332	167.906	153.322	145.078
chr20:48504564:48505361	chr20	48504564	48505361	.	798	-0.69113	4.19664	0.000164232	0.00284238	16.8939	16.9949	17.8362	29.3883	24.7903	29.3905
chr20:48841080:48841977	chr20	48841080	48841977	.	898	-0.786046	4.1861	2.46133e-05	0.000660568	15.37	13.3139	15.0474	22.4938	25.9502	27.0994
chr20:48942187:48942692	chr20	48942187	48942692	.	506	-0.707338	5.12875	7.23544e-07	4.24341e-05	64.387	40.556	50.561	83.2227	90.1198	81.5498
chr20:48955193:48956430	chr20	48955193	48956430	.	1238	-0.793364	4.75699	5.21799e-07	3.30314e-05	16.9826	14.9907	15.2808	29.0373	23.2922	29.7703
chr20:49709915:49710501	chr20	49709915	49710501	.	587	-1.67762	1.85032	0.000195737	0.00324885	4.37456	0.911993	2.45544	8.16539	9.99613	7.20992
chr20:49955186:49955678	chr20	49955186	49955678	.	493	-1.22638	2.34214	0.00052768	0.00687907	5.85974	5.79137	5.48178	17.3612	14.2825	8.58464
chr20:50741417:50742114	chr20	50741417	50742114	.	698	-1.53249	2.54646	5.60578e-06	0.000210346	4.82855	3.06785	4.12992	12.5075	12.7298	9.85296
chr20:55857137:55858356	chr20	55857137	55858356	.	1220	-0.763278	4.61881	3.31388e-06	0.000138839	14.339	16.6745	13.1434	28.2029	23.9106	22.8378
chr20:55862284:55863049	chr20	55862284	55863049	.	766	-1.04023	3.3853	2.61094e-05	0.000691512	9.63789	8.15356	7.99701	20.1127	18.8223	14.2732
chr20:59087571:59087865	chr20	59087571	59087865	.	295	-0.745696	3.95271	0.000222545	0.00357936	34.2745	33.2697	47.6376	67.8924	54.5571	70.5371
chr20:59954389:59955119	chr20	59954389	59955119	.	731	-2.23631	1.0276	0.000700743	0.00853389	0.219551	1.46468	0.739403	3.51262	3.2108	4.8247
chr20:60024791:60025663	chr20	60024791	60025663	.	873	-0.616103	4.50504	0.000222495	0.00357936	18.0163	18.3966	24.3526	29.4126	32.6465	30.9054
chr20:60203628:60204196	chr20	60203628	60204196	.	569	-1.3918	2.00609	0.00069507	0.0084767	3.38471	1.56807	5.69951	9.62708	8.54452	9.91734
chr20:60328112:60329541	chr20	60328112	60329541	.	1430	-1.05939	5.48512	1.57803e-14	2.38009e-11	21.9975	18.4686	19.9067	45.9676	42.4399	37.6116
[truncated: 594 more rows]
