# Supplementary material for: Global and context-specific transcriptional consequences of oncogenic Fbw7 mutations
Source: eLife. 2022 Feb 28;11:e74338. doi: 10.7554/eLife.74338 (PMC8926403; doi:10.7554/eLife.74338)
Supplement: Figure 6—source data 4. — NSC, neural stem cell. [file elife-74338-fig6-data4.xlsx]

## Sheet: Sheet1
	DNA Sample ID	CT raw		Average	Delta Ct	Delta Delta Ct	Min DDCt	Fold change	CT raw		Average
DRA	U5NSC WT _1	19.6987	19.6719	19.6853	4.25243	0	0	1	15.4085	15.4572	15.4328
DRA	U5NSC Fbw7-/- _1	20.0174	19.9627	19.9901	4.34486	0.0924296	-0.0924296	0.937942	15.6556	15.6348	15.6452
DRB	U5NSC WT _1	22.1227	22.2413	22.182	6.74915	0	0	1	15.4085	15.4572	15.4328
DRB	U5NSC Fbw7-/- _1	21.6392	21.6741	21.6566	6.01141	-0.73774	0.73774	1.66756	15.6556	15.6348	15.6452
DPA	U5NSC WT _1	24.1366	24.1553	24.146	8.71314	0	0	1	15.4085	15.4572	15.4328
DPA	U5NSC Fbw7-/-_1	23.1167	23.1574	23.137	7.49184	-1.2213	1.2213	2.33157	15.6556	15.6348	15.6452
DPB	U5NSC WT _1	27.408	27.3478	27.3779	11.945	0	0	1	15.4085	15.4572	15.4328
DPB	U5NSC Fbw7-/- _1	25.7345	25.7047	25.7196	10.0744	-1.87059	1.87059	3.65681	15.6556	15.6348	15.6452
DRA	U5NSC WT _2	19.9406	19.9233	19.932	4.72928	0	0	1	15.2039	15.2015	15.2027
DRA	U5NSC Fbw7-/- _2	20.0103	20.0551	20.0327	4.53128	-0.197994	0.197994	1.1471	15.5178	15.4851	15.5014
DRB	U5NSC WT _2	22.2778	22.2509	22.2643	7.06167	0	0	1	15.2039	15.2015	15.2027
DRB	U5NSC Fbw7-/- _2	21.7287	21.7521	21.7404	6.23899	-0.822675	0.822675	1.76868	15.5178	15.4851	15.5014
DPA	U5NSC WT _2	24.3025	24.2384	24.2704	9.06776	0	0	1	15.2039	15.2015	15.2027
DPA	U5NSC Fbw7-/- _2	23.2813	23.2668	23.274	7.77261	-1.29514	1.29514	2.45401	15.5178	15.4851	15.5014
DPB	U5NSC WT _2	26.9276	26.8884	26.908	11.7053	0	0	1	15.2039	15.2015	15.2027
DPB	U5NSC Fbw7-/- _2	25.8539	25.7824	25.8182	10.3167	-1.38861	1.38861	2.61827	15.5178	15.4851	15.5014
DRA	U5NSC WT _3	20.1855	20.1098	20.1476	4.54971	0	0	1	15.598	15.5979	15.5979
DRA	U5NSC Fbw7-/- _3	20.3044	20.2894	20.2969	4.53041	-0.0192952	0.0192952	1.01346	15.7741	15.7589	15.7665
DRB	U5NSC WT _3	22.6337	22.4888	22.5613	6.96333	0	0	1	15.598	15.5979	15.5979
DRB	U5NSC Fbw7-/- _3	21.8354	21.6474	21.7414	5.97495	-0.988386	0.988386	1.98396	15.7741	15.7589	15.7665
DPA	U5NSC WT _3	24.7793	24.8015	24.7904	9.19247	0	0	1	15.598	15.5979	15.5979
DPA	U5NSC Fbw7-/- _3	23.4273	23.4388	23.4331	7.66659	-1.52588	1.52588	2.87963	15.7741	15.7589	15.7665
DPB	U5NSC WT _3	27.2342	27.248	27.2411	11.6431	0	0	1	15.598	15.5979	15.5979
DPB	U5NSC Fbw7-/- _3	26.1425	26.1126	26.1276	10.3611	-1.28206	1.28206	2.43187	15.7741	15.7589	15.7665
	P value	Mean of WT	Mean of Fbw7-/-	Difference	SE of difference	t ratio	df	q value
DRA	0.617889	1	1.033	-0.03333	0.06173	0.5399	4	0.312034
DRB	0.000908	1	1.807	-0.8067	0.09135	8.831	4	0.000917
DPA	0.000743	1	2.553	-1.553	0.167	9.303	4	0.000917
DPB	0.007604	1	2.903	-1.903	0.3823	4.979	4	0.00512
