# Supplementary material for: Global and context-specific transcriptional consequences of oncogenic Fbw7 mutations
Source: eLife. 2022 Feb 28;11:e74338. doi: 10.7554/eLife.74338 (PMC8926403; doi:10.7554/eLife.74338)
Supplement: Source data 1. — Experimental conditions of all CUT&RUN experiments included in the study. [file elife-74338-data1.xlsx]

## Sheet: CUT&RUN
TF/histone	Cell Type	Fbw7 mutational status	Replicate	pA-Mnase Digesion Duration	Antibody	C&R Protocol	# of cells
H3K27ac	Hct116	WT	1	3 min	anti-H3K27ac	Manual CUT&RUN	1 million
H3K27ac	Hct116	WT	2	3 min	anti-H3K27ac	Manual CUT&RUN	1 million
H3K27ac	Hct116	WT	3	3 min	anti-H3K27ac	Manual CUT&RUN	1 million
H3K27ac	Hct116	Fbw7-/-	1	3 min	anti-H3K27ac	Manual CUT&RUN	1 million
H3K27ac	Hct116	Fbw7-/-	2	3 min	anti-H3K27ac	Manual CUT&RUN	1 million
H3K27ac	Hct116	Fbw7-/-	3	3 min	anti-H3K27ac	Manual CUT&RUN	1 million
H3K27ac	Hct116	Fbw7R/+	1	3 min	anti-H3K27ac	Manual CUT&RUN	1 million
H3K27ac	Hct116	Fbw7R/+	2	3 min	anti-H3K27ac	Manual CUT&RUN	1 million
H3K27ac	Hct116	Fbw7R/+	3	3 min	anti-H3K27ac	Manual CUT&RUN	1 million
Negative Control for H3K27ac	Hct116	WT		3 min	IgG	Manual CUT&RUN	1 million
Negative Control for H3K27ac	Hct116	Fbw7-/-		3 min	IgG	Manual CUT&RUN	1 million
Negative Control for H3K27ac	Hct116	Fbw7R/+		3 min	IgG	Manual CUT&RUN	1 million
H3K27me3	Hct116	WT	1	30 min	anti-H3K27me3	Auto CUT&RUN	0.1 million
H3K27me3	Hct116	WT	2	30 min	anti-H3K27me3	Auto CUT&RUN	0.1 million
H3K27me3	Hct116	WT	3	30 min	anti-H3K27me3	Auto CUT&RUN	0.1 million
H3K27me3	Hct116	Fbw7-/-	1	30 min	anti-H3K27me3	Auto CUT&RUN	0.1 million
H3K27me3	Hct116	Fbw7-/-	2	30 min	anti-H3K27me3	Auto CUT&RUN	0.1 million
H3K27me3	Hct116	Fbw7-/-	3	30 min	anti-H3K27me3	Auto CUT&RUN	0.1 million
H3K27me3	Hct116	Fbw7R/+	1	30 min	anti-H3K27me3	Auto CUT&RUN	0.1 million
H3K27me3	Hct116	Fbw7R/+	2	30 min	anti-H3K27me3	Auto CUT&RUN	0.1 million
H3K27me3	Hct116	Fbw7R/+	3	30 min	anti-H3K27me3	Auto CUT&RUN	0.1 million
Negative Control for H3K27me3	Hct116	WT		30 min	IgG	Auto CUT&RUN	0.1 million
Negative Control for H3K27me3	Hct116	Fbw7-/-		30 min	IgG	Auto CUT&RUN	0.1 million
Negative Control for H3K27me3	Hct116	Fbw7R/+		30 min	IgG	Auto CUT&RUN	0.1 million
H3K4me1	Hct116	WT	1	30 min	anti-H3K4me1	CUT&RUN with nuclei	5 million
H3K4me1	Hct116	Fbw7-/-	1	30 min	anti-H3K4me1	CUT&RUN with nuclei	5 million
Negative Control for H3K4me1	Hct116	Fbw7-/-		30 min	IgG	CUT&RUN with nuclei	5 million
cJun	Hct116	WT	1	30 min	anti-cJun	Auto CUT&RUN	1 million
cJun	Hct116	WT	2	30 min	anti-cJun	Auto CUT&RUN	1 million
cJun	Hct116	WT	3	30 min	anti-cJun	Auto CUT&RUN	1 million
cJun	Hct116	Fbw7-/-	1	30 min	anti-cJun	Auto CUT&RUN	1 million
cJun	Hct116	Fbw7-/-	2	30 min	anti-cJun	Auto CUT&RUN	1 million
cJun	Hct116	Fbw7-/-	3	30 min	anti-cJun	Auto CUT&RUN	1 million
cJun	Hct116	Fbw7R/+	1	30 min	anti-cJun	Auto CUT&RUN	1 million
cJun	Hct116	Fbw7R/+	2	30 min	anti-cJun	Auto CUT&RUN	1 million
cJun	Hct116	Fbw7R/+	3	30 min	anti-cJun	Auto CUT&RUN	1 million
cMyc	Hct116	WT	1	30 min	anti-cMyc	Auto CUT&RUN	1 million
cMyc	Hct116	WT	2	30 min	anti-cMyc	Auto CUT&RUN	1 million
cMyc	Hct116	WT	3	30 min	anti-cMyc	Auto CUT&RUN	1 million
cMyc	Hct116	Fbw7-/-	1	30 min	anti-cMyc	Auto CUT&RUN	1 million
cMyc	Hct116	Fbw7-/-	2	30 min	anti-cMyc	Auto CUT&RUN	1 million
cMyc	Hct116	Fbw7-/-	3	30 min	anti-cMyc	Auto CUT&RUN	1 million
cMyc	Hct116	Fbw7R/+	1	30 min	anti-cMyc	Auto CUT&RUN	1 million
cMyc	Hct116	Fbw7R/+	2	30 min	anti-cMyc	Auto CUT&RUN	1 million
cMyc	Hct116	Fbw7R/+	3	30 min	anti-cMyc	Auto CUT&RUN	1 million
Negative Control for cJun and cMyc	Hct116	WT		30 min	IgG	Auto CUT&RUN	1 million
Negative Control for cJun and cMyc	Hct116	Fbw7-/-		30 min	IgG	Auto CUT&RUN	1 million
Negative Control for cJun and cMyc	Hct116	Fbw7R/+		30 min	IgG	Auto CUT&RUN	1 million
cJun	U5-NSC	WT	1	30 min	anti-cJun	Auto CUT&RUN	0.5 million
cJun	U5-NSC	WT	2	30 min	anti-cJun	Auto CUT&RUN	0.5 million
cJun	U5-NSC	WT	3	30 min	anti-cJun	Auto CUT&RUN	0.5 million
cJun	U5-NSC	Fbw7-/-	1	30 min	anti-cJun	Auto CUT&RUN	0.5 million
cJun	U5-NSC	Fbw7-/-	2	30 min	anti-cJun	Auto CUT&RUN	0.5 million
cJun	U5-NSC	Fbw7-/-	3	30 min	anti-cJun	Auto CUT&RUN	0.5 million
Negative Control for cJun	U5-NSC	WT		30 min	IgG	Auto CUT&RUN	0.5 million
Negative Control for cJun	U5-NSC	Fbw7-/-		30 min	IgG	Auto CUT&RUN	0.5 million
