# Supplementary material for: Global and context-specific transcriptional consequences of oncogenic Fbw7 mutations
Source: eLife journal article supplement (doi:10.7554/elife.74338), 2022-02-28
Supplement: supp [file ImageJ quantification.xlsx]

## Sheet: Sheet1
Trial 02
	Band	Background
HLA-DR WT	186.067	216.61
HLA-DR Del	165.953	221.103
Tub WT	233.845	252.61
Tub Del	232.826	252.4
											Ratio (Net protein/Net Loading Control)		Fold Increase
Trial 02											WT	Del
Lane (Sample)	Protein HLA-DR	Inverted Protein HLA-DR	Background	Inverted Background	Net value		Ratio (Net protein/Net Loading Control)			Trial 01	1.62766	2.81751	1.73102
WT	186.067	68.933	216.61	38.39	30.543		1.62766			Trial 02	0.81267	1.79687	2.21107
Del	165.953	89.047	221.103	33.897	55.15		2.81751
Lane (Sample)	Loading Control	Inverted Loading Control	Background	Inverted Background
WT	233.845	21.155	252.61	2.39	18.765
Del	232.826	22.174	252.4	2.6	19.574
Trial 01
	Band	Background
HLA-DR WT	84.846	118.701
HLA-DR Del	81.358	152.647
Tub WT	192.687	234.346
Tub Del	194.306	233.98
Trial 01
Lane (Sample)	Protein HLA-DR	Inverted Protein HLA-DR	Background	Inverted Background	Net value		Ratio (Net protein/Net Loading Control)
WT	84.846	170.154	118.701	136.299	33.855		0.81267
Del	81.358	173.642	152.647	102.353	71.289		1.79687
Lane (Sample)	Loading Control	Inverted Loading Control	Background	Inverted Background
WT	192.687	62.313	234.346	20.654	41.659
Del	194.306	60.694	233.98	21.02	39.674
NSC
HLA-DRDPDQ WT	196.288
HLA-DRDPDQ Del	175.49
Tub WT	221.425
Tub Del	228.127
Lane (Sample)	Protein HLA-DR	Inverted Protein HLA-DR	Background	Inverted Background	Net value		Ratio (Net protein/Net Loading Control)				Ratio (Net protein/Net Loading Control)		Fold Increase
WT	196.288	58.712	235.973	19.027	39.685		2.87781				WT	Del
Del	175.49	79.51	235.814	19.186	60.324		8.39816			Trial 01	2.87781	8.39816	2.91825
Lane (Sample)	Loading Control	Inverted Loading Control	Background	Inverted Background
WT	221.425	33.575	235.215	19.785	13.79
Del	228.127	26.873	235.31	19.69	7.183
